# Supplementary material for: Multiscale mapping of transcriptomic signatures for cardiotoxic drugs
Source: PubMed Central journal article supplement — Nat Commun. 2024 Sep 11;15:7968. doi: 10.1038/s41467-024-52145-4 (PMC11390749; doi:10.1038/s41467-024-52145-4), 2024-09-11
Supplement: 41467_2024_52145_MOESM1_ESM.pdf [file 41467_2024_52145_MOESM1_ESM.pdf]

# Multiscale Mapping of Transcriptomic Signatures for Cardiotoxic Drugs

## Supplementary Information

Jens Hansen,<sup>1,2</sup> Yuguang Xiong,<sup>1,2</sup> Mustafa Siddiq,<sup>1,2</sup> Priyanka Dhanan,<sup>1,2</sup> Bin Hu,<sup>1,2</sup> Bhavana Shewale,<sup>1,3</sup> Arjun S. Yadaw,<sup>1,2</sup> Gomathi Jayaraman,<sup>1,2</sup> Rosa Tolentino,<sup>1,2</sup> Yibang Chen,<sup>1,2</sup> Pedro Martinez,<sup>1,2</sup> Kristin G. Beaumont,<sup>4</sup> Robert Sebra,<sup>4</sup> Dusica Vidovic,<sup>5</sup> Stephan C. Schürer,<sup>5</sup> Joseph Goldfarb,<sup>1,2</sup> James Gallo,<sup>2,6</sup> Marc R. Birtwistle,<sup>1,7</sup> Eric A. Sobie,<sup>1,2</sup> Evren U. Azeloglu,<sup>1,2,8</sup> Seth Berger,<sup>9</sup> Angel Chan,<sup>1,10</sup> Christoph Schaniel,<sup>1,11</sup> Nicole C. Dubois,<sup>\*,1,3</sup> Ravi Iyengar<sup>\*,1,2</sup>

1 Mount Sinai Institute for Systems Biomedicine, Icahn School of Medicine at Mount Sinai, New York, NY 10029, USA

2 Department of Pharmacological Sciences, Icahn School of Medicine at Mount Sinai, New York, NY 10029, USA

3 Department of Cell, Developmental and Regenerative Biology, Icahn School of Medicine at Mount Sinai, New York, NY 10029, USA

4 Department of Genetics and Genomic Sciences, Icahn School of Medicine at Mount Sinai, New York, NY 10029, USA

5 Institute for Data Science and Computing, University of Miami, Coral Gables, FL 33146, USA

6 School of Pharmacy and Pharmaceutical Sciences, University of Buffalo SUNY System, Buffalo, NY 14260, USA

7 Chemical and Biomolecular Engineering, Clemson University, Clemson, SC, 29634, USA

8 Department of Medicine, Division of Nephrology, Icahn School of Medicine at Mount Sinai, New York, NY 10029, USA

9 Center for Genetic Medicine Research, Children's National Research Institute, Washington DC USA, 20012, Washington, DC 20012, USA

10 Cardiology Division, Department of Medicine, Memorial Sloan Kettering Cancer Center New York, NY 10065, USA

11 Department of Medicine, Division of Hematology and Medical Oncology, Tisch Cancer Institute, Icahn School of Medicine at Mount Sinai, New York, NY 10029, USA

\*These authors jointly supervised this work.

Address correspondence to

Jens Hansen - [jens.hansen@mssm.edu](mailto:jens.hansen@mssm.edu)

or

Nicole Dubois - [nicole.dubois@mssm.edu](mailto:nicole.dubois@mssm.edu)

or

Ravi Iyengar - [ravi.iyengar@mssm.edu](mailto:ravi.iyengar@mssm.edu)

## **Supplementary Note 1**

### **Organization of Supplementary Information in two parts**

The supplementary information is organized in two parts. The first part contains the supplementary notes 1 and 2, most supplementary figures and supplementary tables. The second part contains supplementary figures with very detailed information that can span multiple pages. For the first investigation of our supplementary information, we suggest to focus (and eventually print) only the first part (pages 1 - 78) that includes referenced page positions for the figures of the second part.

Part 1: Pages 1-78: Main Supplementary Information

Page 2: Supplementary Note 1

Pages 2-10: Supplementary Note 2

Pages 11-75: Most Supplementary Figures

Pages 76-78: Supplementary Tables

Part 2: Pages 79-341: Supplementary Figures with very detailed information

Pages 79-93: Supplementary Figure 11

Pages 94-97: Supplementary Figure 12

Pages 98-111: Supplementary Figure 14B

Pages 112-125: Supplementary Figure 14C

Pages 126-139: Supplementary Figure 14D

Pages 140-154: Supplementary Figure 14E

Pages 155-173: Supplementary Figure 17

Pages 174-182: Supplementary Figure 29

## **Supplementary Note 2**

### **Drug-selective gene expression profiles allow for identification of SCPs which agree with prior knowledge of SCPs associated with cardiac diseases and drug effects**

Up- and downregulated genes in each cell line/drug combination were subjected to enrichment analysis using the Molecular Biology of the Cell Ontology (MBCO) <sup>28</sup> and Fisher's exact test. Predicted subcellular processes (SCPs) were ranked by decreasing significance for each list of genes and SCP level. We will refer to these ranks as enrichment ranks.

As outlined in the main text, the SVD-based identification of drug-selective gene expression profiles greatly increased the number of predicted SCPs that are up- or downregulated in at least two of three, three of four, four of five or four of six cell lines (i.e.,  $\geq 66\%$ ) by the same drugs (Supplementary Fig. 15A). The median overlap between downregulated level-1, -2, -3, -4 SCPs among the top 5, 5, 10 and 5 predicted SCPs increased from 2 to 3.5, 1 to 3, 1 to 4 and 0 to 1, respectively. The median overlap between upregulated level-1, -2, -3, -4 SCPs among the top 5, 5, 10 and 5 predicted SCPs increased from 1 to 3, 0 to 3, 1 to 4 and 0 to 1, respectively. These results depend on the complete SVD-pipeline, since removal of the first eigenarray alone improved the median number of drug-selective overlapping up- or downregulated SCPs in only one case (upregulated level-2 SCPs, from 0 to 1).

Analysis of drug-selective gene expression profiles enabled identification of enrichment patterns that were obscured within the complete gene expression profiles. For example, our decomposition pipeline allowed identification of SCPs that were selectively downregulated by the group of anthracyclines that have high rates of cardiotoxicity<sup>100</sup>. These SCPs are involved in iron metabolism and single protein turn-over (Supplementary Fig. 14/B/C/D/E). They form parent-child relationships within three MBCO branches (Supplementary Fig. 15B). The observed downregulation of 'Cellular iron storage' is in agreement with the suggested interference of anthracyclines with iron metabolism<sup>101</sup> and ferroptosis as a disease mechanism involved in heart failure<sup>38</sup>. The clinical relevance of our unbiased findings from transcriptomic data is suggested by the use of iron chelators as supportive therapy<sup>42</sup>, though the protective effect of iron chelators might involve mechanisms that are not primarily targeting iron homeostasis<sup>43</sup>. Identified down-regulation of SCPs involved in protein degradation might explain cardiotoxicity by interference with sarcomere turn-over<sup>30</sup>, as supported by the cardiotoxic effects of proteasome inhibitors<sup>102</sup>. The almost exclusive downregulation of these SCPs by anthracyclines could not be documented using the complete gene expression profiles (Supplementary Fig. 15C).

SCPs predicted from the drug-selective gene expression profiles of other drugs often describe functions that are supported by prior knowledge as well, based on transcriptomic and orthogonal methodologies.

For example, enrichment analysis of nilotinib-selective gene expression profiles leads to a more consistent prediction of upregulated SCPs involved in centrosome and mitotic spindle dynamics as well as mitosis compared to analysis of nilotinib's complete gene expression profiles (Supplementary Fig. 14B/C/D). Similar results were obtained for the kinase inhibitors imatinib, ponatinib, sorafenib and regorafenib. In agreement, previous morphological analysis documents centrosome aberrations and mitotic spindle defects induced by treatment of primary human fibroblasts with imatinib or nilotinib<sup>103</sup>. Centrosome defects were also observed in disease-unaffected cells from patients treated with imatinib, nilotinib, sorafenib, sunitinib, dasatinib and bosutinib<sup>104</sup>.

There are two MBCO level-3 SCPs that refer to increased cholesterol synthesis activity, 'Cholesterol synthesis' and 'Cholesterol-sensitive control of SREBP activation'. Though multiple drugs upregulate these SCPs at varying ranks, analysis of lapatinib-selective gene

expression profiles predicts upregulation of both SCPs at top enrichment ranks (5x rank 1 and ranks 2, 3, 4, 5, 6, respectively) (Supplementary Fig. 14D). In agreement, mevalonate pathway activity was found to be increased in lapatinib-resistant and lapatinib + trastuzumab-resistant cells <sup>105</sup>. Resistance was reversed by statin treatment that inhibits cholesterol synthesis.

**SCPs associated with cardiotoxic and non-cardiotoxic responses to TKI treatment describe cellular dysfunctions involved in drug-independent cardiomyopathy development.**

In the main text, we briefly describe SCPs involved in muscle contraction and sarcomere renewal, energy metabolism and ferroptosis. Here, we discuss identified and additional pathways in more detail.

Our F1 score and AUC statistics generate lists of SCPs that are up- or downregulated by cardiotoxic or non-cardiotoxic TKIs. Within each toxicity group combined up- and downregulated SCPs were ranked by decreasing AUC. We will refer to these ranks as AUC ranks to distinguish them from the enrichment ranks that are described above.

As already indicated in the main results section, we distinguish between SCPs whose activity for an association with a cardiotoxic response reaches sufficient levels after TKI treatment or is already sufficient at baseline levels. The first set of SCPs was identified by screening for those SCPs that are up- or downregulated at higher ranks by cardiotoxic TKIs, as compared to non-cardiotoxic TKIs. Treatment with a cardiotoxic TKI might change the SCP activity beyond a threshold that separates non-association from association with a cardiotoxic response. Treatment with a non-cardiotoxic TKI might move the SCP activity across the threshold in the opposite direction, changing its status from sufficient to insufficient for association with a cardiotoxic response. Both sets of SCPs can be organized based on the SCP activity that favors a cardiotoxic response. SCPs upregulated by cardiotoxic TKIs and downregulated by non-cardiotoxic TKIs are SCPs whose higher activity could favor a cardiotoxic response ('bad SCPs'). In contrast, SCPs downregulated by cardiotoxic TKIs and upregulated by non-cardiotoxic TKIs are SCPs whose lower activity could favor a cardiotoxic response ('good SCPs'). We use this classification in comparing the inferred SCPs from this data set to previously published data, since presence or absence of sufficient SCP activity is associated with presence or absence of cardiomyopathy development. We followed this principle in our figures as well. For SCPs that are upregulated by cardiotoxic and downregulated by non-cardiotoxic TKIs we use the colors red and orange, respectively (Supplementary Figs. 17 and 18). For SCPs downregulated by cardiotoxic and upregulated by non-cardiotoxic TKIs we use the colors blue and light blue, respectively. The same color scheme was applied in our network-based visualization that integrates identified SCPs into the MBCO parent-child hierarchy and groups SCPs participating in similar functions into the same module (Fig. 2C, Supplementary Fig. 19).

For both TKI groups we focused on the top 10 level-1, 10 level-2, 25 level-3 and 10 level-4 SCPs based on increasing AUC ranks (Supplementary Fig. 18). Six level-1, two level-2, eleven level-3 and four level-4 of those SCPs were predicted to be relevant for cardiotoxicity and regulated by both TKI groups in the opposite direction. In these cases, both TKI groups link the same SCP activities (i.e., higher or lower) to be associated with a cardiotoxic response. This approach was mostly successful. We only obtained conflicting results for one level-4 SCP that was downregulated by both TKI groups.

Identified SCPs were mapped back to the TKIs that increase or decrease their activity. To document which TKIs contributed to the identification of an SCP we show which cardiotoxic (Supplementary Fig. 20) or non-cardiotoxic (Supplementary Fig. 21) TKIs up- or downregulate an identified SCP at specified enrichment ranks.

### **Sarcomere dynamics**

SCPs involved in muscle contractility were discussed in the main section. Here we want to add some more details. Identified level-1 SCP 'Cellular contraction', its level-3 grandchild SCPs 'Thin myofilament organization', 'Myofibril formation' and the level-4 SCPs 'Actin filament depolymerization' and 'Myoglobin synthesis' (Fig. 2B, Supplementary Fig. 19), are all involved in dynamics and turnover of the sarcomere, as already described in the main results section. The identified SCPs whose lower activities favor a cardiotoxic response, belong to those SCPs that were identified with evidence for both the cardiotoxic and non-cardiotoxic group: four of five SCPs were downregulated by cardiotoxic TKIs and at the same time upregulated by non-cardiotoxic TKIs (Supplementary Fig. 18). In addition, the level-2 SCP 'Myofibril formation and organization', a child of 'Cellular contraction' is identified (Supplementary Fig. 19), because it is downregulated by the non-cardiotoxic TKIs (Supplementary Fig. 18). Overall, all cardiotoxic TKIs, except vandetinib and trastuzumab downregulate (Supplementary Fig. 20), while 13 of 17 non-cardiotoxic TKIs upregulate (Supplementary Fig. 21) at least one of the contractility-related SCPs in one to six or one to five cell lines, respectively. Four of six SCP genes of the SCP 'Thin myofilament organization' that are inhibited by cardiotoxic and induced by non-cardiotoxic TKIs are components of tropomyosin or inhibitory troponin. Both complexes interact to block the binding of the myosin head to the thin myofilament during muscle contraction. This mechanism is also targeted by the new drug mavacamten that was recently approved by the FDA to treat obstructive HCM <sup>33</sup>, suggesting clinical relevance of our findings.

### **Electrical transmission**

Four cardiotoxic TKIs, trametinib, trastuzumab, lapatinib and bevacizumab upregulate 'Potassium transmembrane transport' in three of four (enrichment ranks 2, 3, 9), two of three (7, 10), two of five (7, 10) and one of four (17) cell lines (Fig. 2B, Supplementary Fig. 20), respectively. The SCP with an AUC rank of 7 (Fig. 2B, Supplementary Fig. 18) is predicted based on potassium channels, transporters and components of the sodium potassium ATPase

(Supplementary Data 11). Among the SCP genes is *SUR2A* coding for a regulatory subunit of the cardiac ATP-sensitive potassium channel involved in genetic DCM <sup>106</sup>.

The level-3 SCP 'Gap junction organization' is predicted with an AUC rank of 24 for the cardiotoxic TKIs (Fig. 2B, Supplementary Fig. 18). It is downregulated by the cardiotoxic TKI dabrafenib in one of five (enrichment rank 24), pazopanib in two of six (1, 3), ponatinib in three of six (15, 16, 17), vandetinib in one of three (9) and vevacizumab in four of four (13, 2x14, 15) treated cell lines (Supplementary Fig. 20). In agreement, multiple connexins that form the building block of gap junctions are downregulated in explanted heart from patients with idiopathic cardiomyopathy <sup>107</sup>.

## Energy metabolism

We identified multiple SCPs that suggest interference with cardiac energy metabolism as a major trigger for TKI-induced cardiotoxicity.

The level-2 SCPs 'Mitochondrial energy production', 'Fatty acid metabolism', 'Carbohydrate metabolism and transport' and 'Post-translational protein modification in Mitochondria' were upregulated by cardiotoxic TKIs with the AUC ranks one to four, respectively (Supplementary Fig. 18). Their upregulated level-3 child SCPs 'Citric acid cycle' and 'Desaturation of fatty acids' were predicted with AUC ranks 1 and 11, respectively (Fig. 2B, Supplementary Figs. 18, 19). Three of these level-2 and -3 SCPs map to ventricular cardiomyocytes in the adult heart (Fig. 3A, Supplementary Fig. 23) as the cell type with the highest energy requirement. These SCPs that interact with each other to ensure energy supply were almost exclusively predicted based on their induction by pazopanib (Supplementary Fig. 20), a TKI with a high rate of cardiotoxicity (>10%) (Supplementary Data 3). Genes of these SCPs induced by pazopanib are involved in the citric acid cycle and oxidative phosphorylation, fatty acid activation, elongation and desaturation as well as glucose import, release from glycogen and degradation (Supplementary Data 11).

Many studies document an overall reduction in oxidative phosphorylation during heart failure <sup>34</sup>, in agreement with the enrichment results obtained in adult and hiPSC-derived DCM and adult HCM cardiomyocytes (Fig. 3B, Supplementary Fig. 24). Nevertheless, compensatory upregulation of oxidative phosphorylation was suggested for a large DCM subgroup that is caused by truncating titin variants <sup>35-37</sup>. Another prominent molecular phenotype observed in these studies is a shift from fatty acid oxidation towards glycolysis. Upregulated genes mapping to carbohydrate catabolism and fatty acid anabolism might support such interpretation of our data as well, though the level-3 and -4 child SCPs that specifically describe these functions, were not among the top predictions. For the non-cardiotoxic TKIs, we predict the level-2 SCP 'Carbohydrate metabolism and transport' and its level-3 child 'Glycolysis and Gluconeogenesis' at ranks 1 and 25, respectively (Supplementary Figs. 18 and 19), based on a set of partly overlapping genes (Supplementary Data 11B and C), further supporting glucose utilization as a cellular function whose higher activity favors a cardiotoxic response to TKI-treatment.

Polyunsaturated fatty acids (PUFAs) generated by genes mapping to the upregulated SCP “Fatty acid desaturation” (Supplementary Data 11C) <sup>39,40</sup> can be deoxygenized by lipoxygenases, resulting in cardiotoxic PUVA hydroperoxides <sup>38</sup>. PUVA hydroperoxides are a main stimulator of ferroptosis, a potentially major mechanism involved in heart failure.

The involvement of ferroptosis in drug-induced cardiomyopathy was also predicted for the cardiotoxic anthracyclines based on the downregulation of ‘Cellular iron storage’ (Supplementary Figs. 14D, 15B), as discussed above. However, upregulated transporter activities involved in import of iron-containing molecules, such as transferrin or haptoglobin-hemoglobin complexes, are predicted as part of the level-3 SCP ‘Cellular iron uptake and export’ for the non-cardiotoxic TKIs with AUC rank 23 (Supplementary Fig. 18). These seemingly contradictory results could indicate that it is the balance in cellular iron content rather than an increase or decrease of iron levels that is associated with cardiotoxicity.

The level-3 SCP ‘Serine and glycine metabolism’ was identified for cardiotoxic and non-cardiotoxic TKIs as an SCP whose higher activity indicates a cardiotoxic response with the AUC ranks 19 and 5, respectively (Supplementary Fig. 18). Seven cardiotoxic (Supplementary Fig. 20) and twelve non-cardiotoxic (Supplementary Fig. 21) TKIs up- and downregulate this SCP, respectively, in one to six cell lines. Dabrafenib, a TKI with a cardiotoxicity frequency between 1 and 10%, upregulated this SCP in all five cell lines with top enrichment ranks (3x1, 2, 3), followed by pazopanib (ranks 2x2, 3, 4, 5) (Supplementary Fig. 20). Identified SCP genes are involved in serine and glycine biosynthesis (Supplementary Data 11C). Stimulation of serine biosynthesis in hiPSC-derived cardiomyocytes from patients with genetic DCM rescues contractile dysfunction in-vitro by increasing the glucose flux into the citric acid cycle and oxidative phosphorylation <sup>108</sup>. The seemingly contradictory findings could indicate a compensatory upregulation of mRNAs coding for serine and glycine metabolism proteins or suggest that levels of serine could be a driver of energy balance in cardiomyocytes. These hypotheses need to be experimentally verified.

Two level-3 SCPs involved in cholesterol synthesis and another SCP predicted based on genes involved in cholesterol export (Supplementary Data 11C) were up- and downregulated by the cardiotoxic TKIs, with the AUC ranks 15, 22 and 23, respectively (Fig. 2B, Supplementary Fig. 18). Both synthesis SCPs were also downregulated by non-cardiotoxic drugs, with the AUC ranks 3 and 24. Our results link higher intracellular cholesterol levels, either based on increased synthesis or decreased export, to a cardiotoxic response. While six cardiotoxic (Supplementary Fig. 20) and eleven non-cardiotoxic (Supplementary Fig. 21) TKIs induce the described pathway activities in opposite directions with varying enrichment ranks, it is, in particular, the cardiotoxic TKI lapatinib that upregulates both cholesterol synthesis SCPs with top enrichment ranks (5x1 and 2, 3, 4, 5, 6). Our observations agree with the results of a meta-analysis documenting a cardioprotective effect of statin treatment against chemotherapy-induced cardiomyopathy <sup>44</sup>, though statins might induce multiple cardioprotective mechanisms besides inhibition of HMG-CoA reductase, the rate-controlling enzyme in cholesterol synthesis <sup>109</sup>.

Since lapatinib resistance of breast cancer cells due to increased cholesterol synthesis could be reversed *in-vitro* by statin treatment<sup>105</sup>, our results might suggest a potential effect of statin treatment on lapatinib's cardiotoxicity as well. Potential detrimental effects of statin treatment in heart failure<sup>110</sup> and involvement of cholesterol biosynthesis intermediates in the antioxidant defense against ferroptosis<sup>38</sup> might indicate the need for correct balance of cholesterol homeostasis and TKI-selective supportive statin therapy.

### **Cellular antioxidant systems**

The level-1 and -2 SCPs 'Cellular redox homeostasis' and 'Cellular antioxidant defense systems' in parent-child relationships (Supplementary Fig. 19) were predicted with AUC ranks 2 and 5 (Supplementary Fig. 18), respectively. Both were downregulated by vandetinib in three of three (enrichment ranks 3, 4, 5 and 3, 4, 7) and bevacizumab in two of four (6, 7 and 7, 8) treated cell lines (Supplementary Fig. 20). Multiple animal models document involvement of oxidative stress in heart failure and oxidative stress biomarkers are increasingly used in the monitoring of heart failure patients<sup>111</sup>. Reduction of oxidative stress is a protective mechanism against ferroptosis<sup>38</sup>, a cardiotoxic mechanism that is also suggested based on other identified SCPs.

### **Posttranslational protein modification and translational quality control**

The cardiotoxic TKI dabrafenib upregulates the level-1 SCP 'Posttranslational protein modification' and its level-2 child SCP 'Posttranslational protein modification and quality control during secretory pathway' (Supplementary Fig. 19) in two of five treated cell lines (both enrichment ranks 1, 2) (Supplementary Fig. 20). Both SCPs were predicted for the cardiotoxic drugs with AUC ranks of 1 and 7, respectively (Supplementary Fig. 18). Many of the upregulated SCP genes participate in protein folding, quality control and stress response in the endoplasmic reticulum (ER) (Supplementary Data 11B). Their upregulation could be a response to protein accumulation in the ER that can be differentiated into two phases<sup>112</sup>. The initial physiological ER stress response of the heart addresses the accumulation of proteins in the ER, while in case of prolonged stress a pathological response triggers autophagy and apoptosis.

### **Cellular signaling pathways**

Among the identified signaling pathways were PDGF, Natriuretic receptor, HIF-1 alpha, Oncostatin M and Hippo signaling (Fig. 2B, Supplementary Fig. 18).

PDGF signaling was identified as an SCP that favors a non-cardiotoxic response with the AUC rank 14 (Fig. 2B, Supplementary Fig. 18) and preferentially maps to cardiac fibroblasts and smooth muscle cells in the adult human heart (Fig. 3A, Supplementary Fig. 23). It is downregulated by seven cardiotoxic TKIs in one to six cell lines (Supplementary Fig. 20). Ponatinib (cardiotoxicity 1-10%), trastuzumab (>10%) and sorafenib (1-10%) downregulated



the SCP in all treated cell lines (enrichment ranks 4, 3x6, 13; 2, 4, 5, 11 and 5, 6, 10, 15, respectively). In agreement with our results, PDGF and PDGF signaling in the heart increase during disease states and are generally considered to play an important role during cardioprotection <sup>113</sup>, as supported by the PDGF-induced increase in cell survival and contractility of engineered cardiac tissue <sup>114,115</sup>.

The level-4 SCPs 'Atrial -', 'Brain-' and 'C-type natriuretic receptor signaling' and their level-3 parent SCP 'Natriuretic peptide receptor signaling' (Supplementary Fig. 19) were identified to favor a non-cardiotoxic response (Supplementary Fig. 18). They were upregulated by six, four, two and six overlapping non-cardiotoxic drugs in one to four cell lines, respectively (Supplementary Fig. 21). The SCP 'Atrial natriuretic peptide receptor signaling' was additionally downregulated by the three cardiotoxic TKIs lapatinib, ponatinib and vandetanib in one of their treated cell lines (enrichment ranks 4, 4 and 2, respectively). Induced genes contain the ligands *NPPA*, *NPPB* and *NPPC* as well as receptor genes (Supplementary Data 11C and D). Though our data was generated *in vitro*, the classification into cardiotoxic and non-cardiotoxic drugs is based on clinical data. A potential explanation for the identified association could be that both secreted ANP and BNP have a protective effect on cardiac preload, afterload and cardiovascular growth <sup>116</sup>. The endopeptidase neprilysin degrades several endogenous vasoactive peptides including natriuretic peptides <sup>117</sup>. Treatment schemes of patients with chronic heart failure that combine neprilysin and angiotensin II receptor inhibition achieve better results than treatment with an angiotensin converting enzyme (ACE) inhibitor <sup>45,46</sup>, suggesting clinical relevance of our findings <sup>117</sup>.

We identified genes involved in the inhibition of HIF-1 alpha signaling (Supplementary Data 11C) as associated with a non-cardiotoxic response with the AUC rank 20 (Fig. 2B, Supplementary Fig. 18). They were downregulated by the two cardiotoxic TKIs dabrafenib and pazopanib in two (enrichment ranks 8, 8) and three (1, 6, 6) of five treated cell lines, respectively (Supplementary Fig. 20). In agreement, only short-term HIF-1 signaling in acute stress situations has a cardioprotective effect, while continuously active HIF-1 signaling might be harmful <sup>118</sup>, suggesting an explanation of why its inhibition under long-term TKI treatment might improve cardiac outcomes.

A similar effect was described for Oncostatin M (OSM) receptor signaling that favors a cardiotoxic response (Supplementary Fig. 18), since it is downregulated by two non-cardiotoxic TKIs in two and four cell lines (Supplementary Fig. 21). Stimulation of OSM signaling cascades mitigates cardiac damage in acute stress conditions, while its chronic activation contributes to the development of heart failure <sup>119</sup>.

The level-3 SCP 'Hippo signaling' was downregulated by cardiotoxic TKIs with an AUC rank of 13 (Fig. 2B, Supplementary Fig. 18). Pazopanib downregulates this SCP in three of five treated cell lines (enrichment ranks 1, 2x6) (Supplementary Fig. 20). It preferentially maps to cardiac fibroblasts in the adult human heart (Supplementary Fig. 23). Five of six downregulated genes inhibit the Hippo downstream transcription factor YAP1 (Supplementary Data 11C). Consistent

with this finding, increased YAP activity and expression of hypertrophic target genes was also observed in HCM patient tissue and a HCM murine model <sup>120</sup>.

### **Extracellular matrix organization**

Fibrillar collagen constitutes the most abundant protein in the cardiac extracellular matrix (ECM) which provides structural organization for the correct alignment of cardiomyocytes, generates myocardial stiffness and helps in force transmission <sup>121</sup>. Diffuse interstitial fibrosis, a histopathological feature observed in non-ischemic cardiomyopathies or hypertensive heart disease is characterized by excessive deposition of type I and III collagen, by changing ratios of type I to type III collagen and by an increase in collagen crosslinking. The degree of collagen crosslinking, but not total collagen deposition correlates with surrogate parameters (e.g., myocardial stiffness) or hospitalization in patients with hypertensive heart disease <sup>47,48</sup>. In agreement, 'Collagen fiber cross-linking' is downregulated by eleven non-cardiotoxic TKIs in one to six cell lines (Supplementary Fig. 21), identified with the AUC rank 7 and consequently categorized as an SCP that favors a cardiotoxic response (Supplementary Fig. 18). Downregulation of the SCP 'Elastin cross-linking and assembly' (AUC rank 16) is predicted based on genes shared with the collagen-cross linking SCP. The SCP 'Collagen fibril organization by fibril-associated bridges' that contains the FACIT collagens is upregulated by eleven non-cardiotoxic TKIs in one to six cell lines (Supplementary Fig. 21) and was identified with the AUC rank 17 as an SCP whose higher activity favors a non-cardiotoxic response (Supplementary Fig. 18). The reduced expression of FACIT collagen during progressive liver cirrhosis is associated with a loss of flexibility <sup>122</sup>. Whether FACIT collagen can exhibit a similar effect on the cardiac wall needs to be investigated.

### **Water transmembrane transport**

Down- and upregulation of aquaporins that are the main components of the level-3 SCP 'Water transmembrane transport' is predicted with AUC ranks of 9 and 2 for cardiotoxic and non-cardiotoxic TKIs, respectively (Fig. 2B, Supplementary Fig. 18). Three cardiotoxic drugs, dabrafenib, pazopanib and ponatinib, downregulate the SCP in two of three (enrichment ranks 6, 7), one of five (4) and two of six (6, 9) treated cell lines (Supplementary Fig. 20). The induced and repressed SCP genes, aquaporins 1, 3, 7 and 10 (Supplementary Data 11C) might be related to their function in transmembrane transport of water (AQP1, 3, 7, 10), CO<sub>2</sub> and NO (AQP1) or urea and the energy substrate glycerol (AQP 3, 7, 10) <sup>123</sup>.

**A**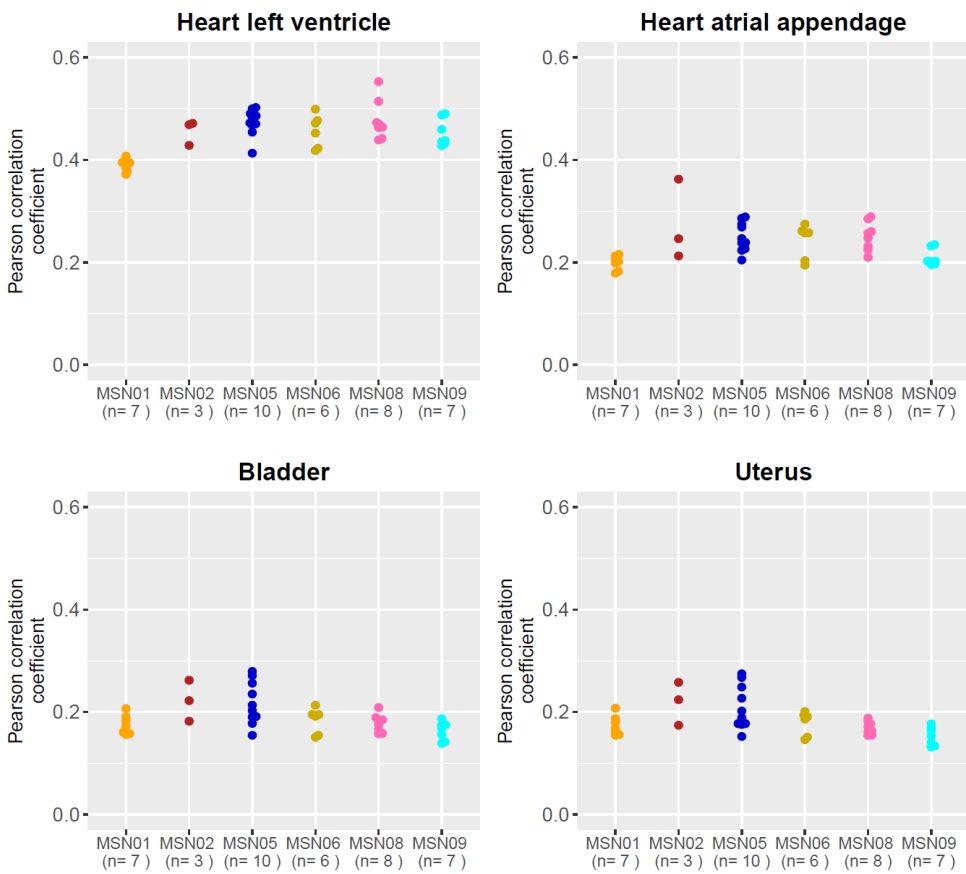**B**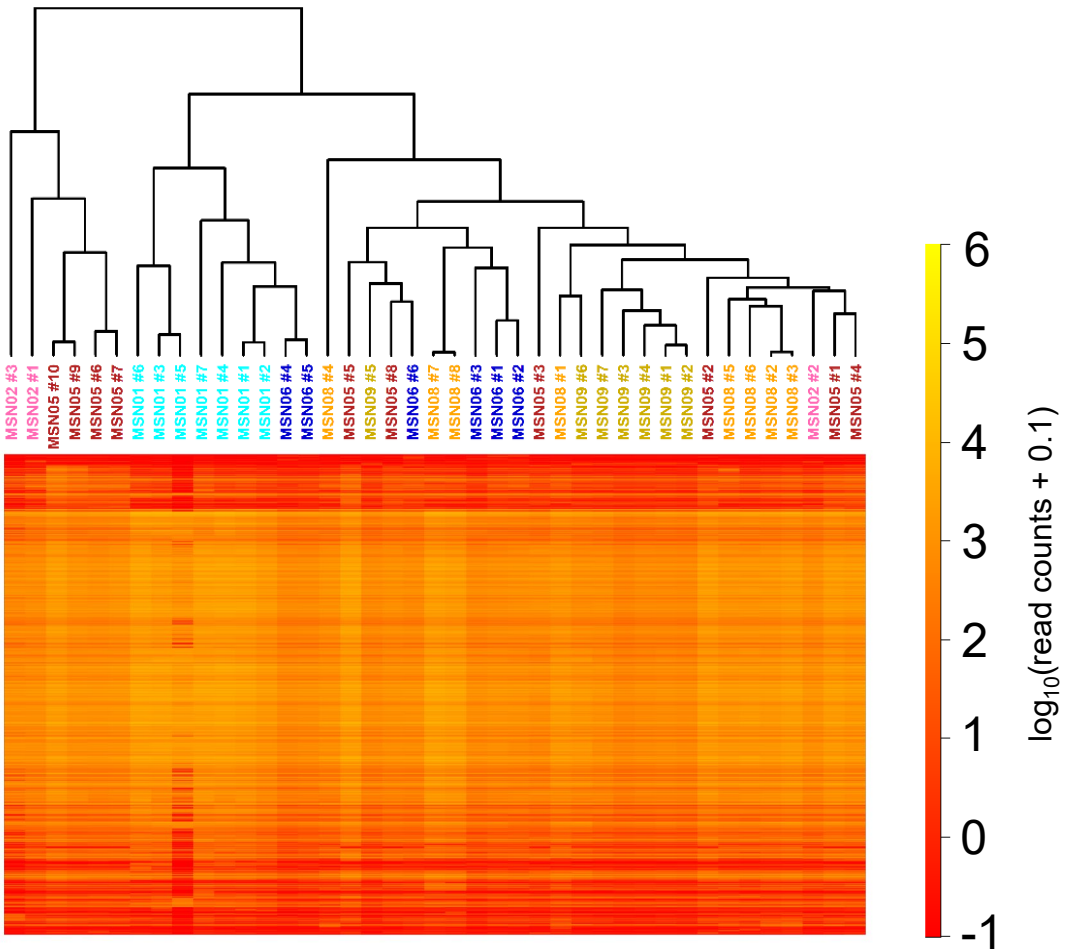

**Supplementary Fig. 1. Basal gene expression of six hiPSC-derived cardiomyocyte cell lines map to the human heart and show cell line specificity. (A)** Raw read counts of vehicle-treated replicates <sup>16</sup> were correlated with median gene expression levels for each tissue in the GTEx database. Pearson correlation coefficients are shown for each replicate of all cell lines and the top four tissues with the highest correlation coefficients. Numbers of replicates are provided in parentheses. **(B)** Gene expression raw counts obtained in all replicates of vehicle-treated cell lines <sup>16</sup> were subjected to pairwise correlation analysis, followed by hierarchical clustering. Visualized matrix shows the  $\log_{10}(\text{read counts} + 0.1)$ . Rows and columns were re-arranged according to clustering results. Replicates of the same cell line are colored with the same color.

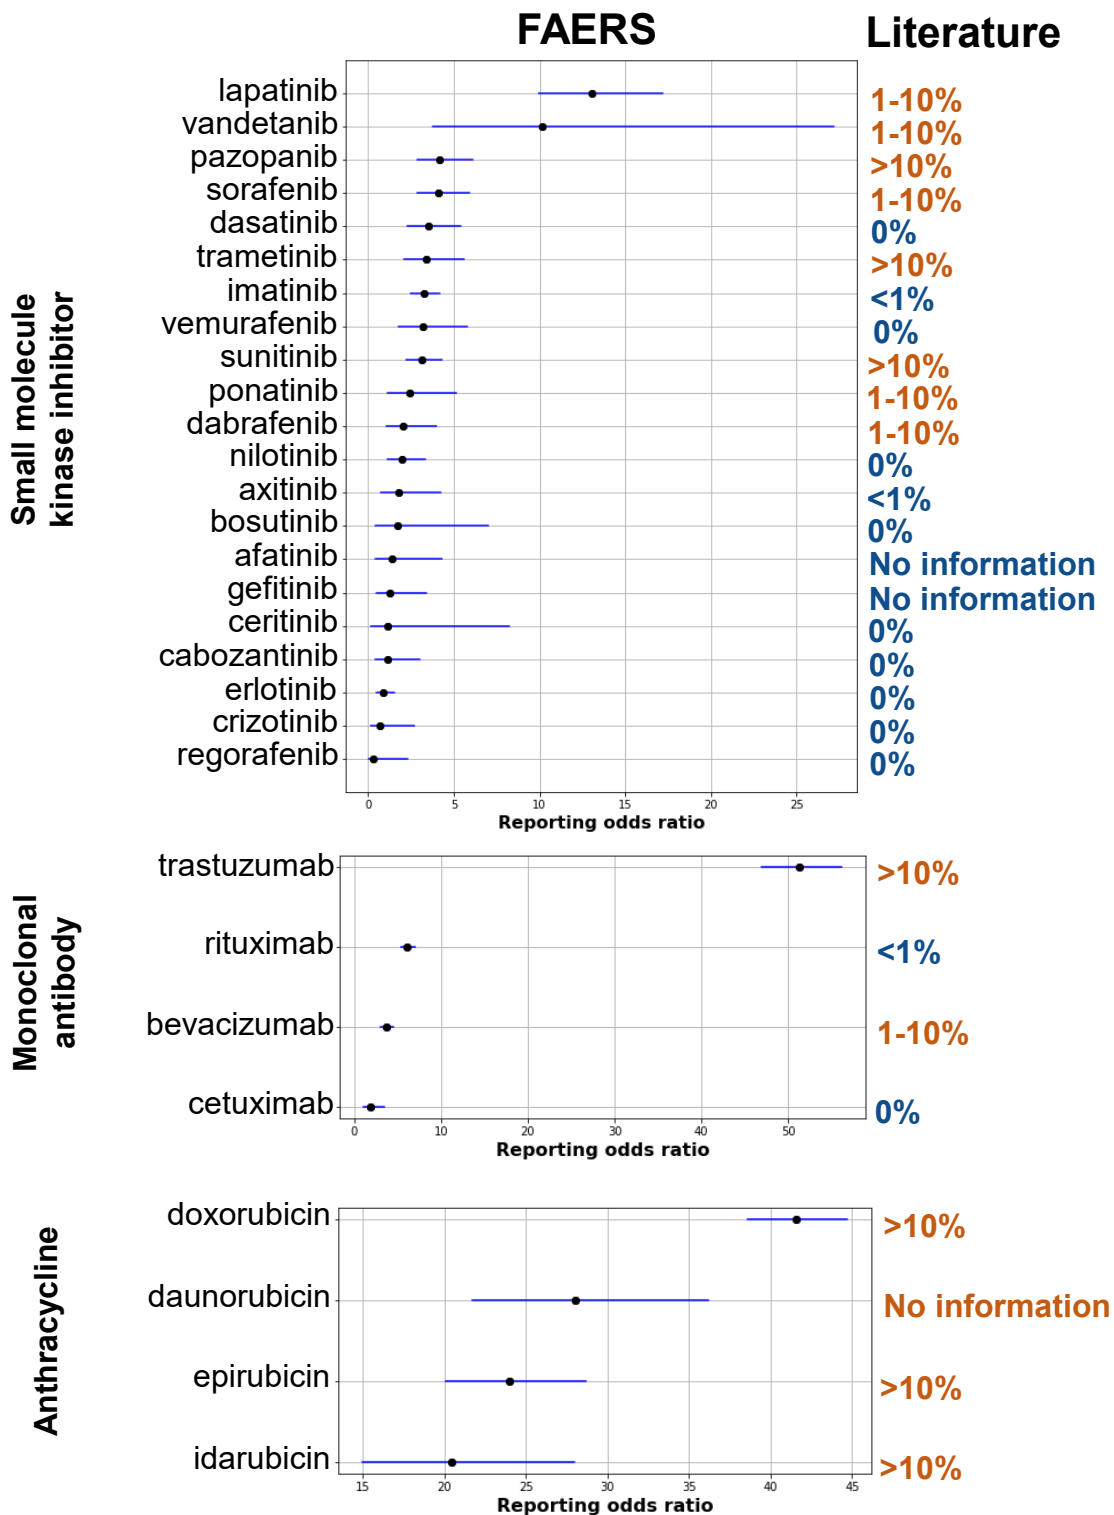

**Supplementary Fig. 2**

**Supplementary Fig. 2. Cardiac toxicity of kinase inhibitors and monoclonal antibodies curated from the FAERS database.** Risk profiles were curated from the FAERS database. Horizontal lines indicate 95% confidence intervals. Blue and orange comments describe published cardiotoxicity levels as outlined in Supplementary Data 3.

**A**

266 drug/cell line combinations  
(54 drugs, 6 cell lines)

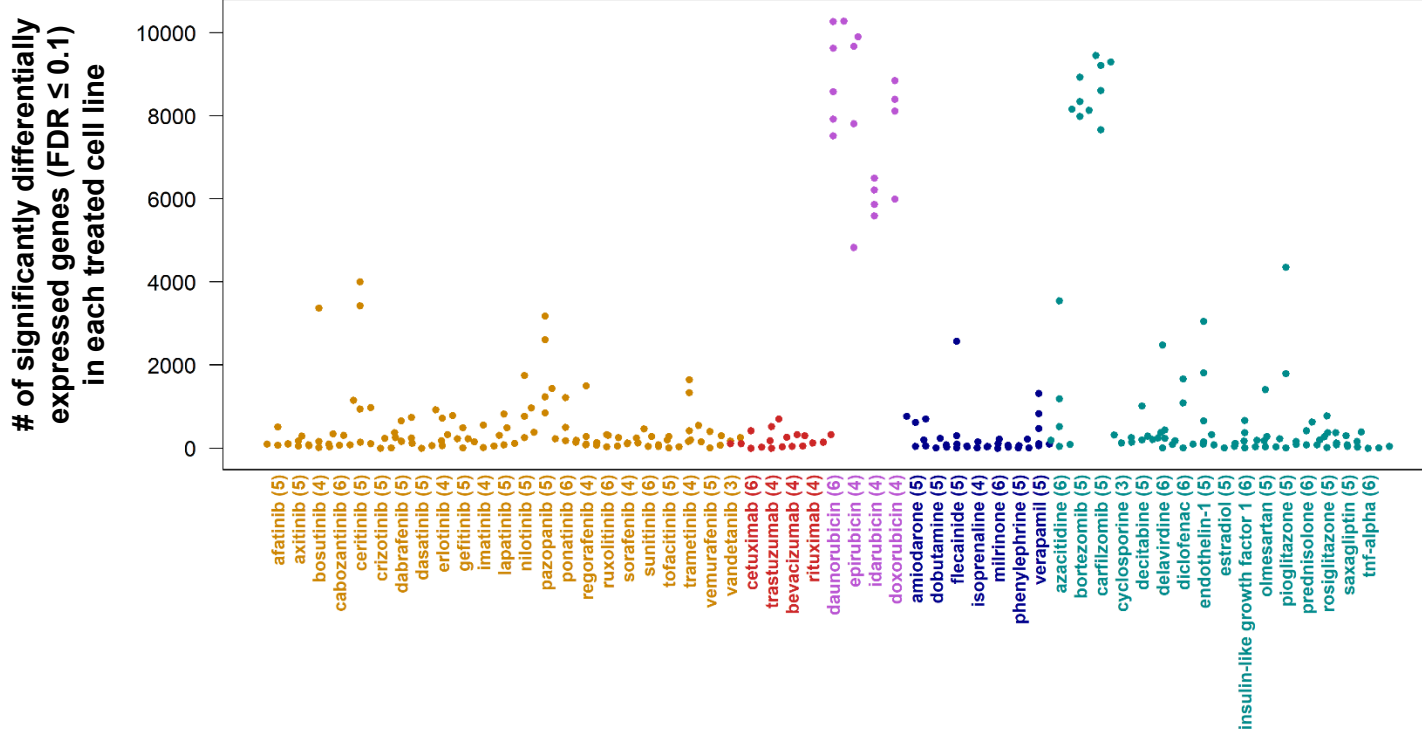

23 Small molecule kinase inhibitors

4 Monoclonal antibodies

4 Anthracyclines

7 Cardiac-acting drugs

16 Non-cardiac-acting drugs

27 Tyrosine kinase inhibitors (TKIs)

# Gene expression profiles of 266 drug/cell combinations

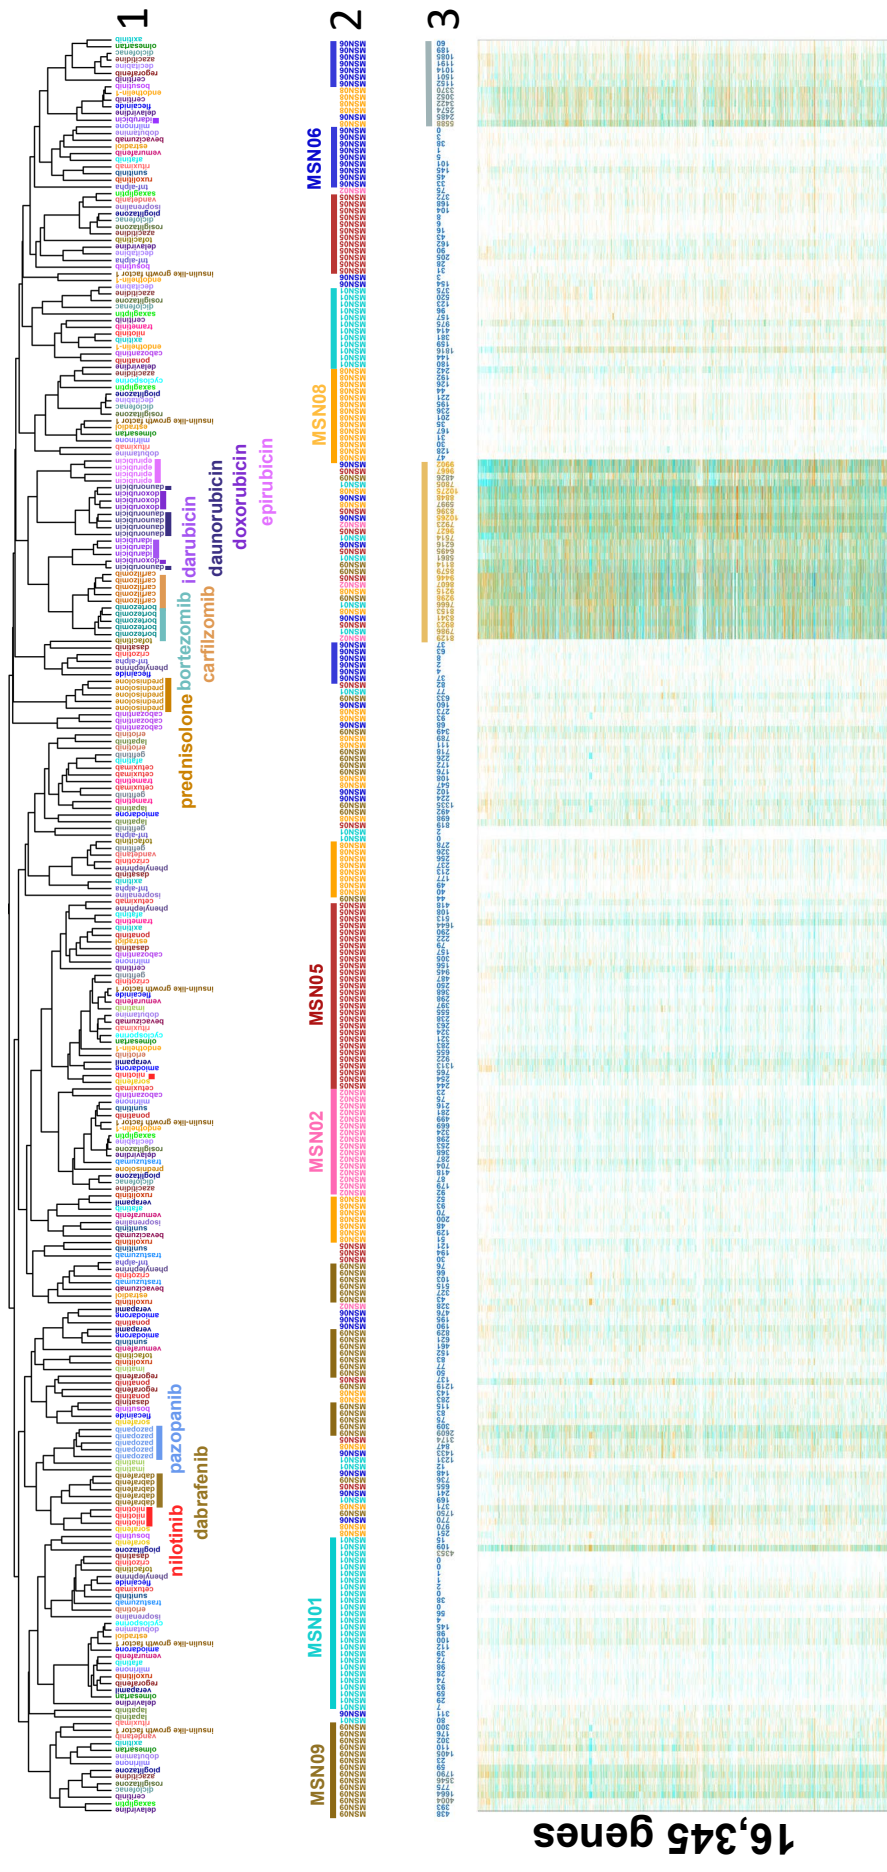

**Supplementary Fig. 3. Drug-induced gene expression profiles in six hiPSC-derived cardiomyocyte cell lines.** (A) Three to six hiPSC-derived cardiomyocyte cell lines were stimulated with one out of 54 drugs or vehicle for 48h, followed by bulk RNAseq and identification of 266 lists of DEGs. The number of DEGs induced by the different drugs in the different cell lines showed great variation ( $FDR \leq 10\%$ ). Total numbers of treated cell lines for each drug are shown in parentheses next to the drug labels. (B) Significance p-values were transformed into  $-\log_{10}(p\text{-values})$  and defined to be positive or negative for up- or downregulated genes, respectively. Pairwise correlation analysis followed by hierarchical clustering, documents that only a few gene expression profiles are determined by the drug used for treatment (1), while most profiles are determined by the treated cell line (2) or the number of significant DEGs (3). Fig. 1B shows the same dendrogram.



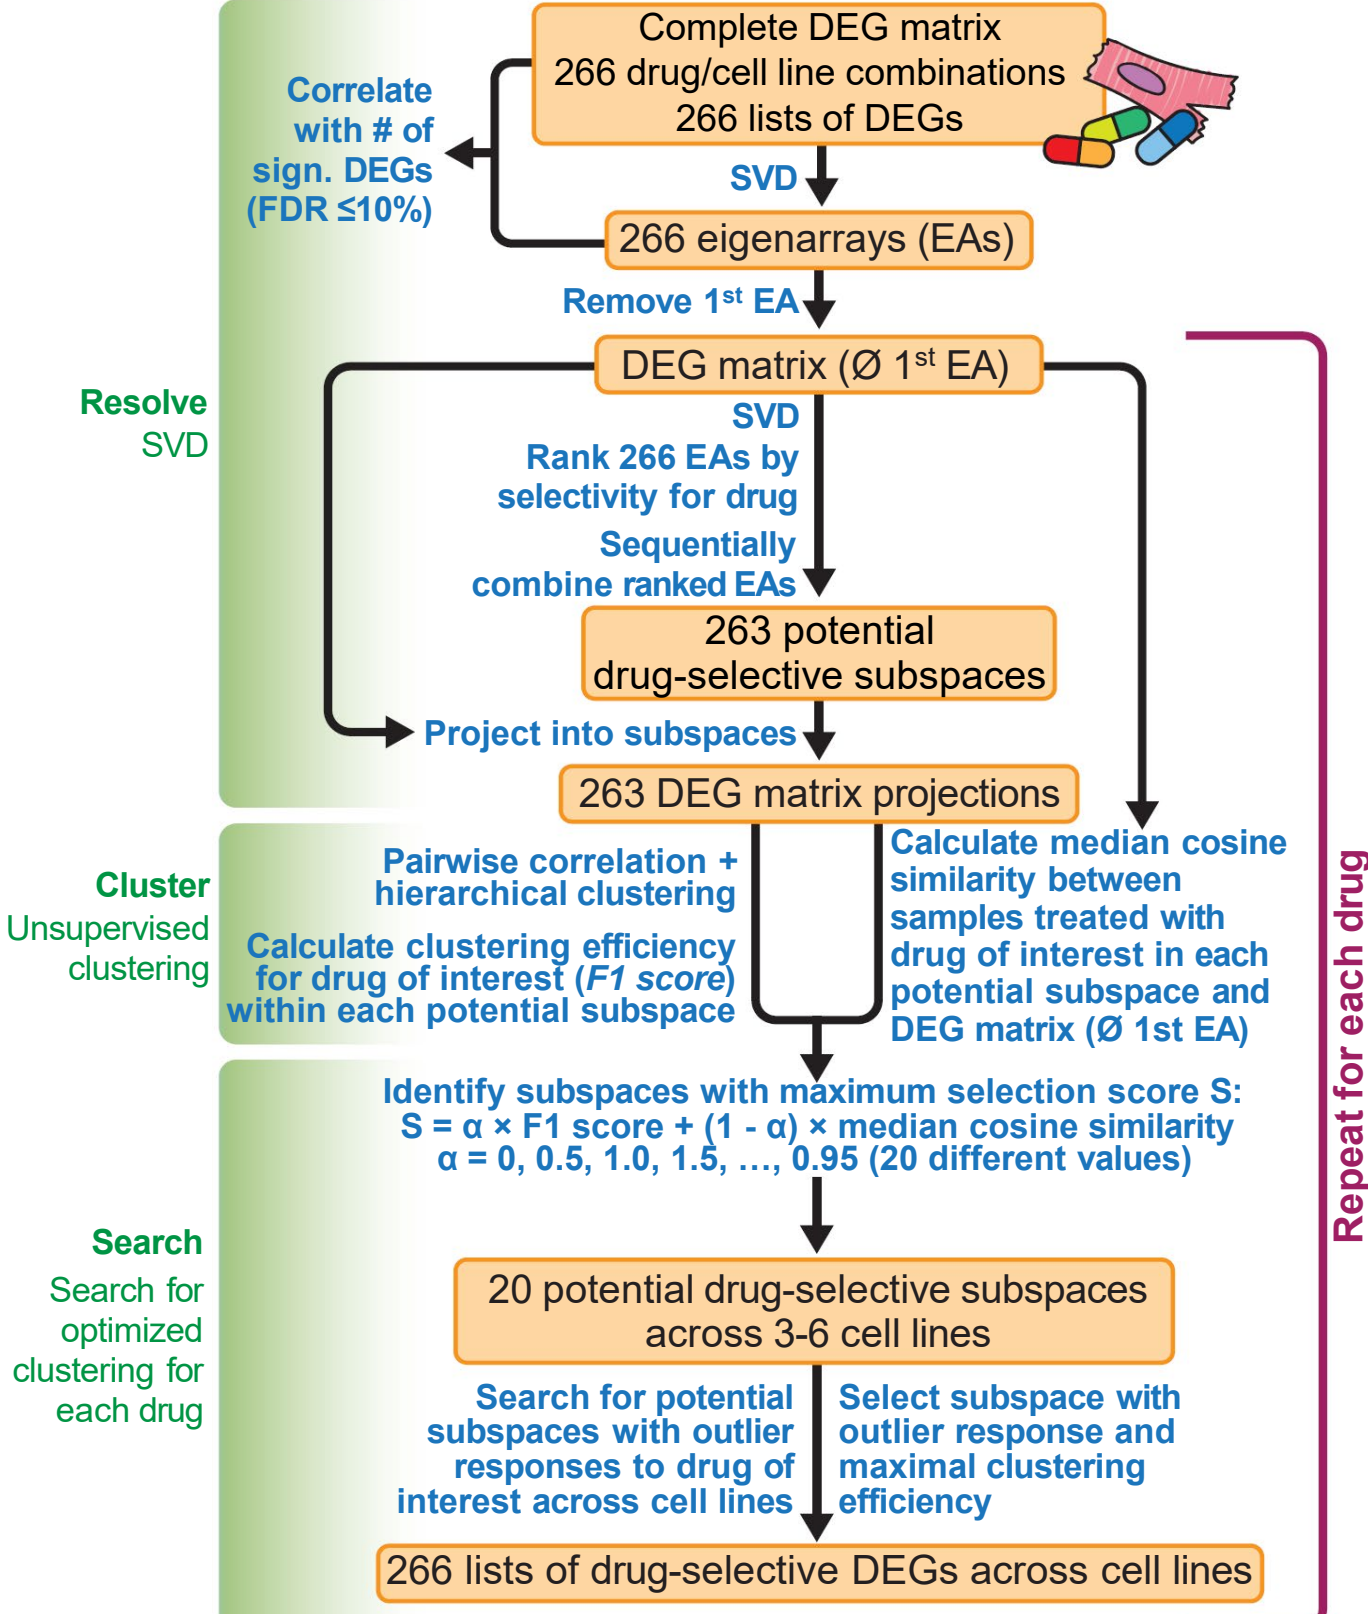

**Supplementary Fig. 4. Computational pipeline for the identification of drug-selective and outlier gene expression responses.** Our pipeline subjects drug-induced DEGs to Singular Value Decomposition (SVD) to identify drug-selective gene expression profiles and cell lines that respond differently to a drug of interest than the other cell lines. See methods for details. &: and; ∅: without. Flow chart is used with permission from Mount Sinai Health System, licensed under CC BY.

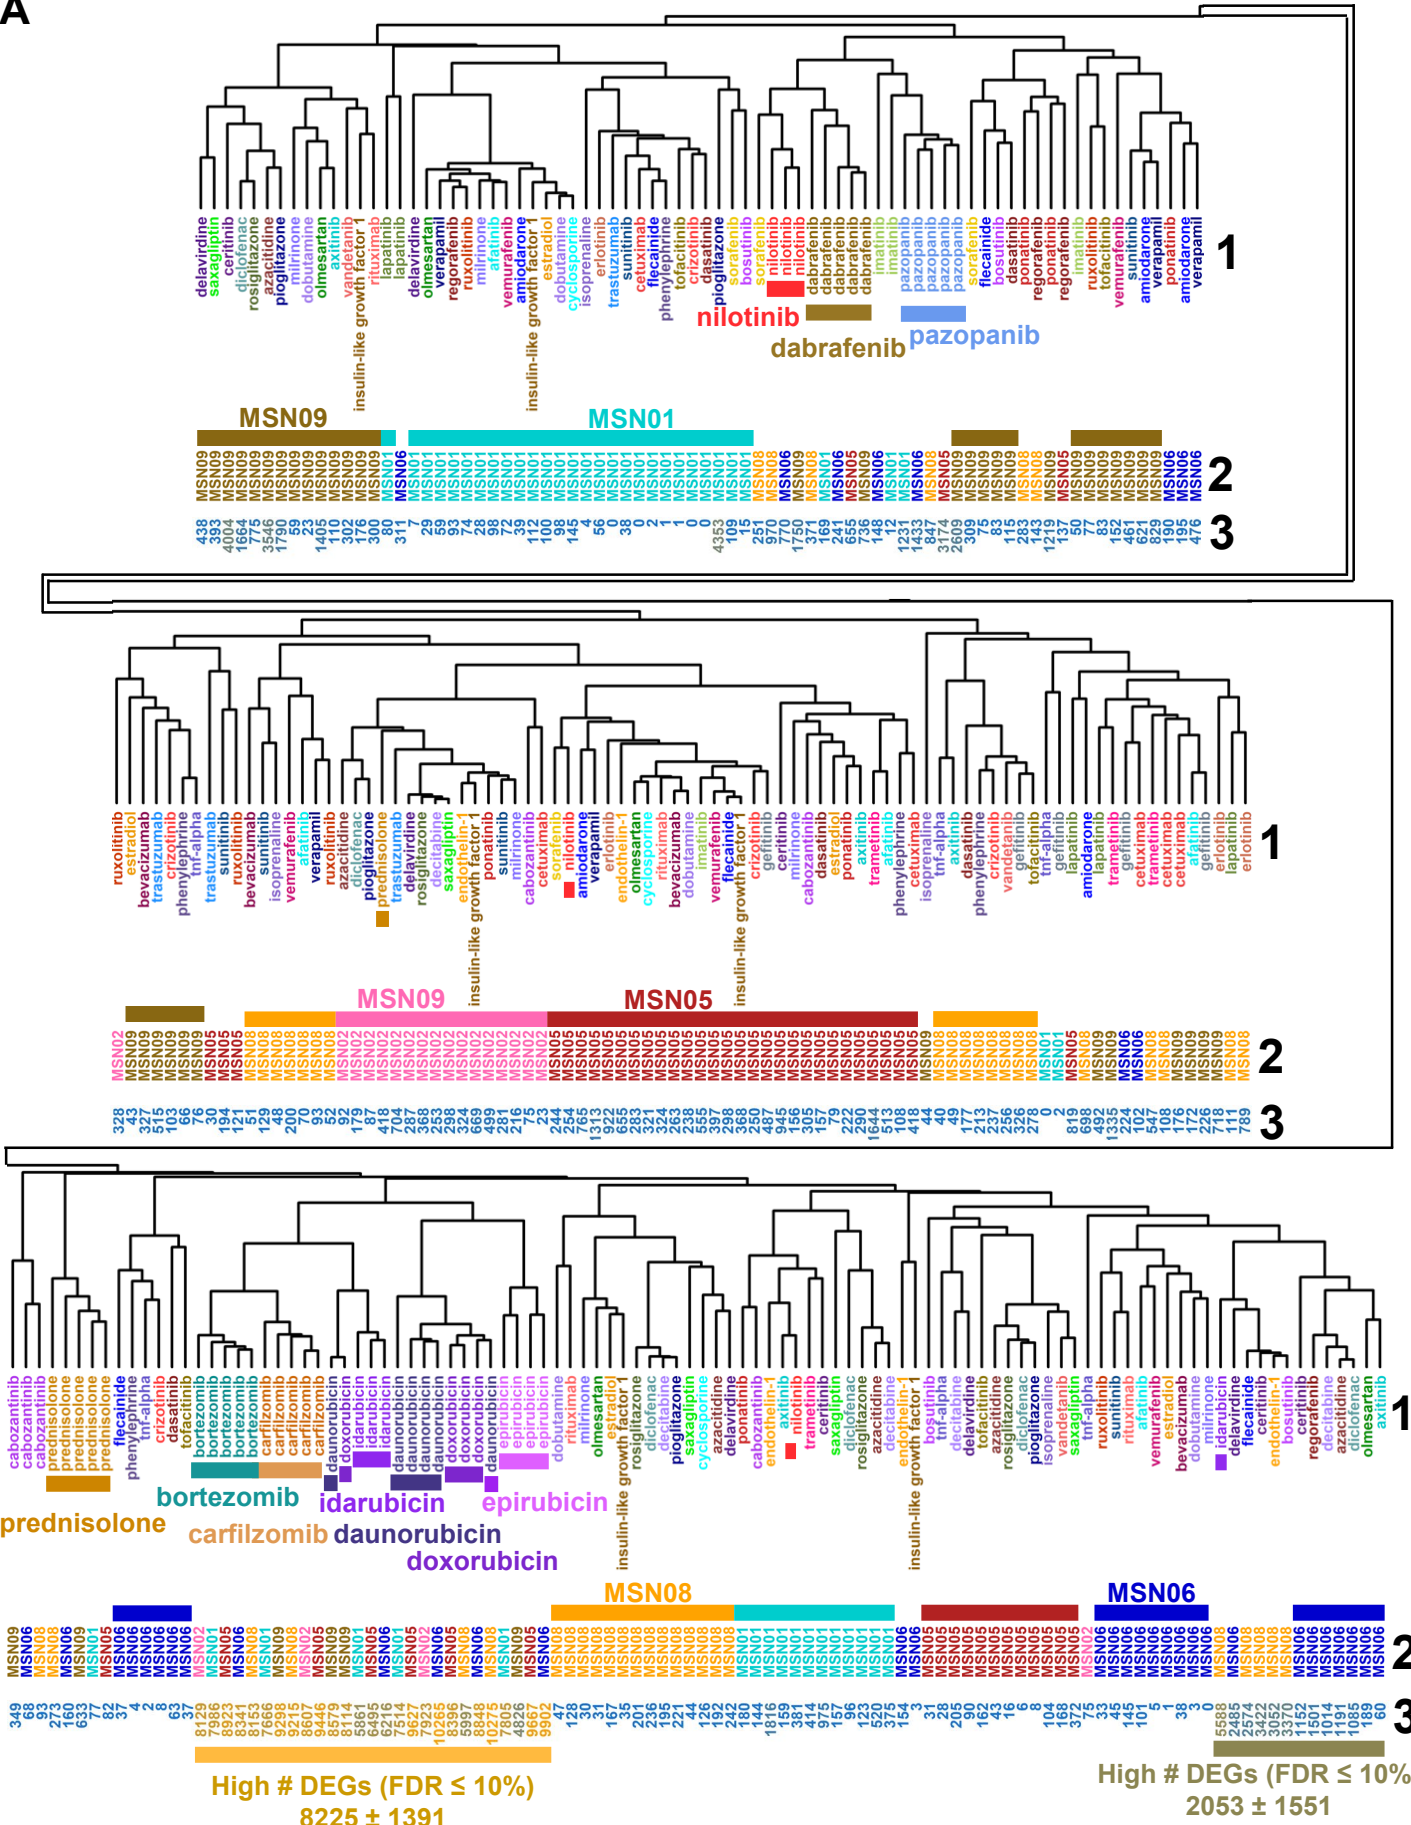

**B****dasatinib cluster in complete gene expression profiles**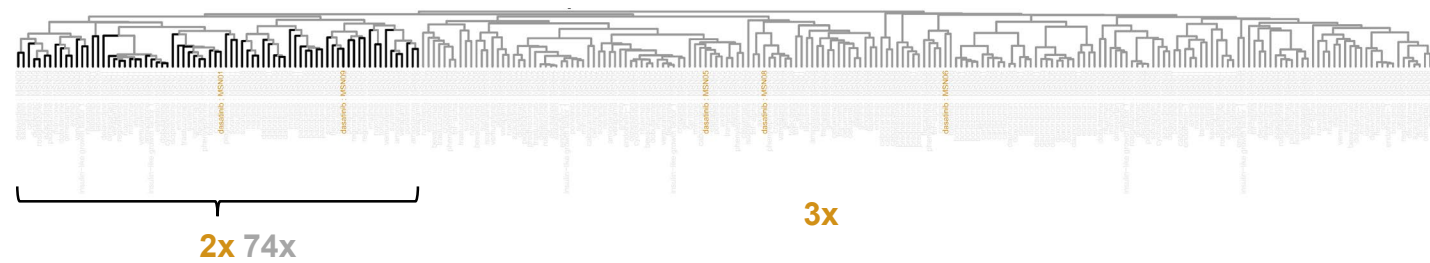

Cluster with highest F1 score  
for dasatinib-treated cell lines  
Precision = 2/76, Recall = 2/5, F1-score = 0.05

**Supplementary Fig. 5**

**Supplementary Fig. 5. Clustering efficiency of drug-induced gene expression profiles in six hiPSC-derived cardiomyocyte cell lines.** (A) To allow detailed investigation of the clustering results we visualized dendrogram and dendrogram labels of Supplementary Fig. 3B at larger sizes. Fig. 1B shows the same dendrogram with a focus on the drugs. (B) For each drug, we calculated one F1 score for each cluster that can be obtained by cutting the dendrogram at any height and contains at least two cell line/drug combinations. The F1 score is the harmonic mean of the precision (how many cell line/drug combinations within a cluster were treated with the drug) and the recall (how many cell line/drug combinations treated with the drug were in that cluster). The cluster with the highest F1 score that was selected for further analysis in this example is labeled black.

**A**

266 samples/lists of DEGs

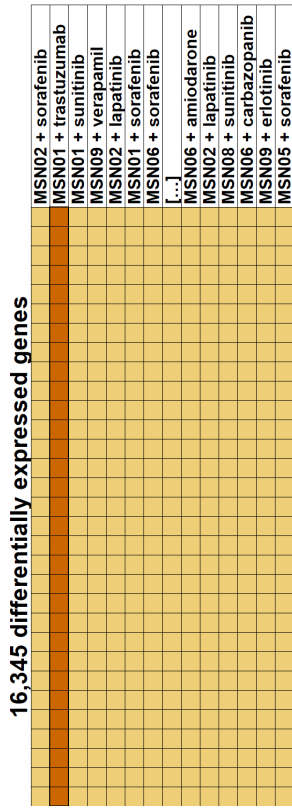

266 eigenarrays

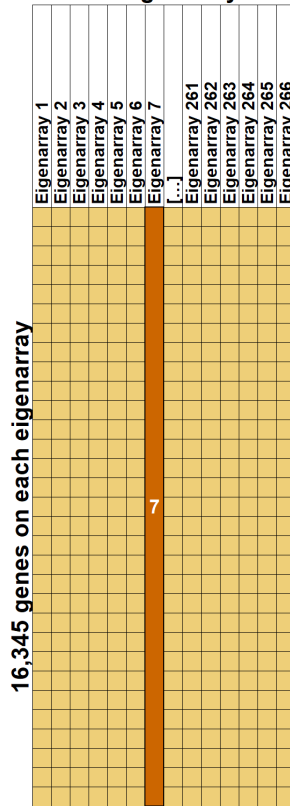

266 singular values

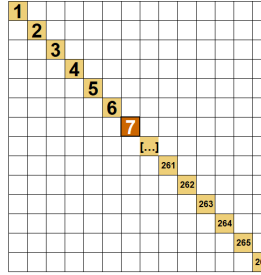

266 coefficients for each eigenarray

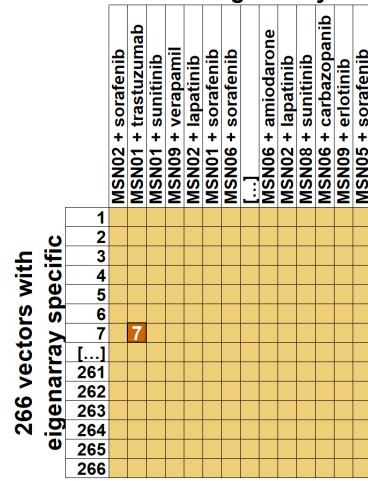

The gene expression profile of each sample is a linear combination of all eigenarrays.

**B**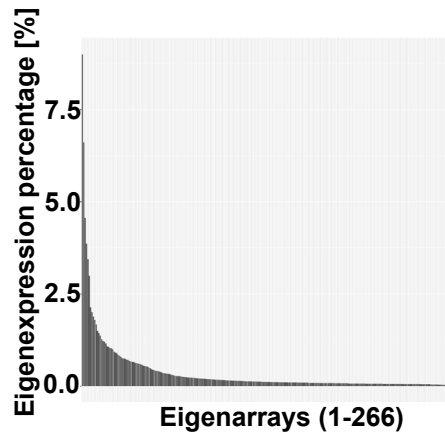**C**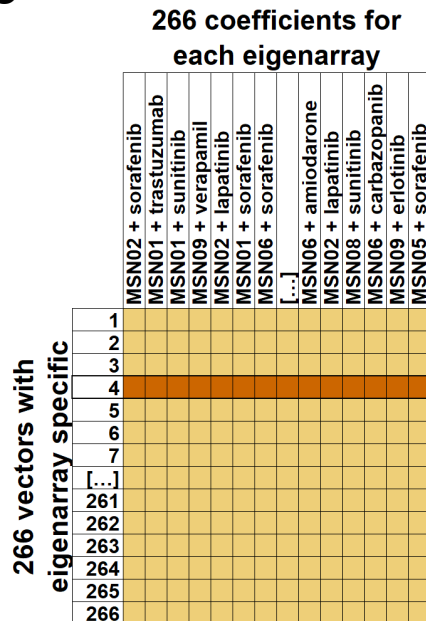**D**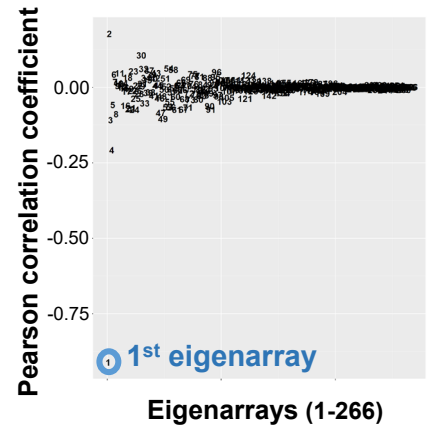

For each eigenarray:

Correlate coefficients of that eigenarray with # of significantly differentially expressed genes in each sample.

E

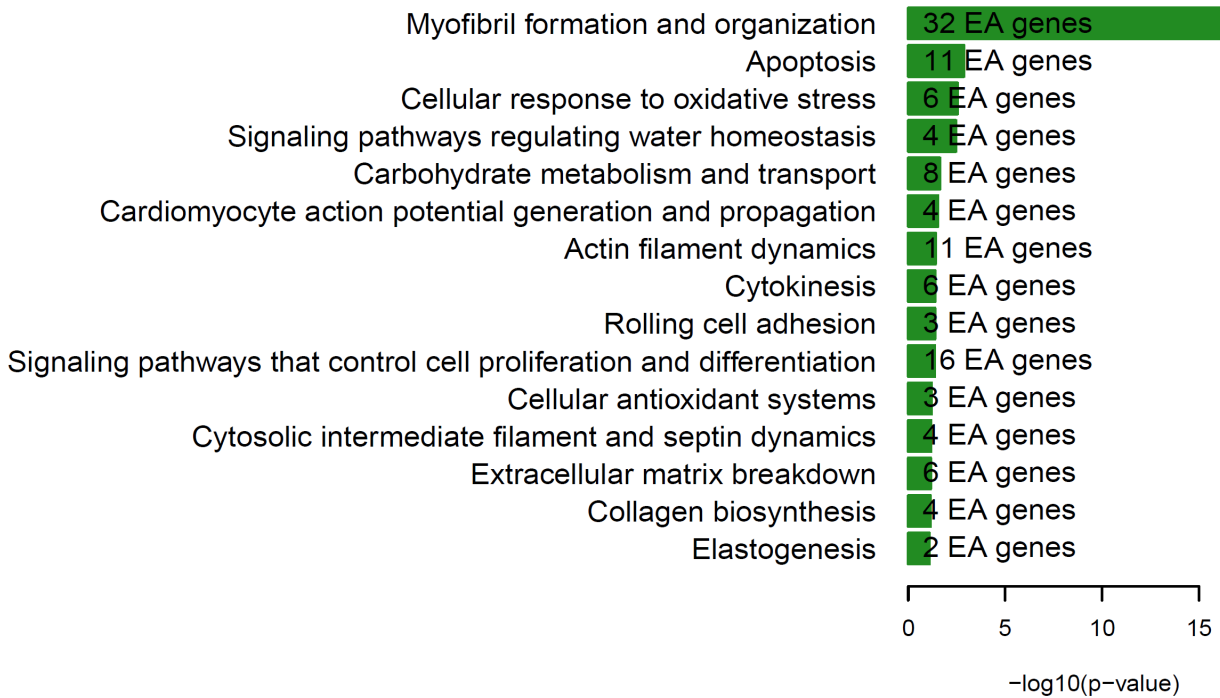

**Supplementary Fig. 6**

**Supplementary Fig. 6. Identification of drug-selective gene expression responses using Singular Value Decomposition.** (A) Singular value decomposition (SVD) decomposes the input data matrix into a matrix of left singular vectors or eigenarrays, a diagonal matrix of singular or eigenexpression values and a matrix of right singular vectors. Each cell line/drug combination gene expression vector in the full matrix is a linear combination of all eigenarrays. Cell line/drug combination specific coefficients of this linear combination are documented in the matrix of right singular vectors. The eigenexpression values in the diagonal document how much each eigenarray contributes to the complete gene expression dataset of all cell line/drug combinations and need to be considered for the linear combination as well. To calculate the contribution of the seventh eigenarray to the complete gene expression profile induced by trametinib in cell line MSN09 it must be multiplied with highlighted eigenexpression value and the highlighted coefficient, both labeled with seven. (B) SVD of the gene expression matrix identified 266 orthonormal eigenarrays that are sorted by their relative contribution to the total variance. (C) For each eigenarray, we calculated the Pearson correlation between the cell line/drug combination-specific coefficients and the number of significant DEGs in the corresponding complete gene expression profiles. (D) Our results document a high correlation with the number of significant DEGs for the first eigenarray. (E) Pathway enrichment analysis of the top 600 genes of the first eigenarray identifies muscle contraction.

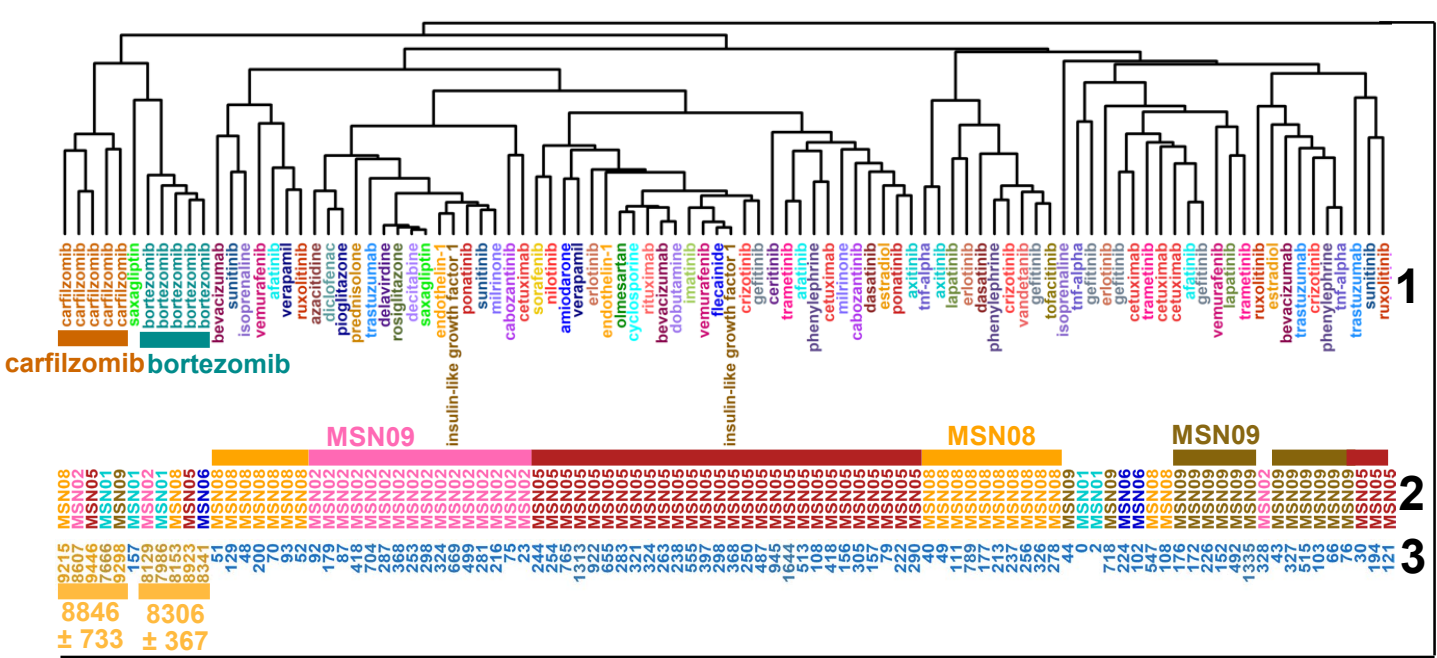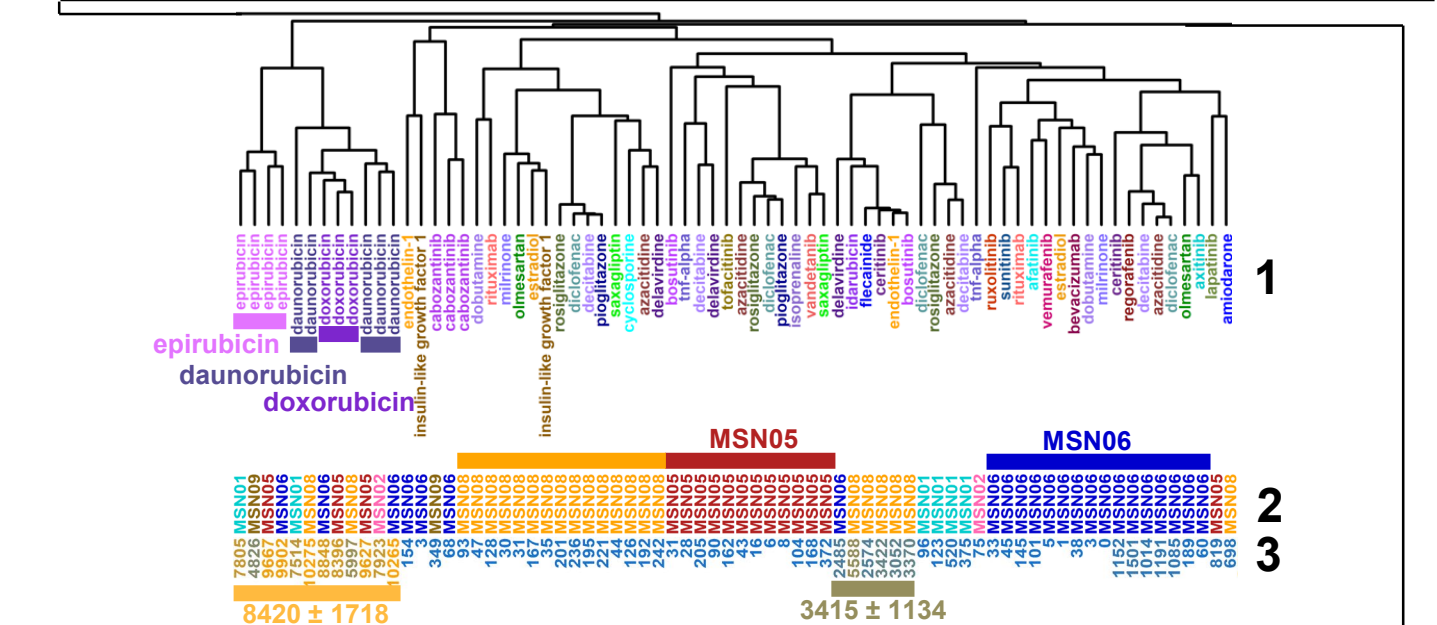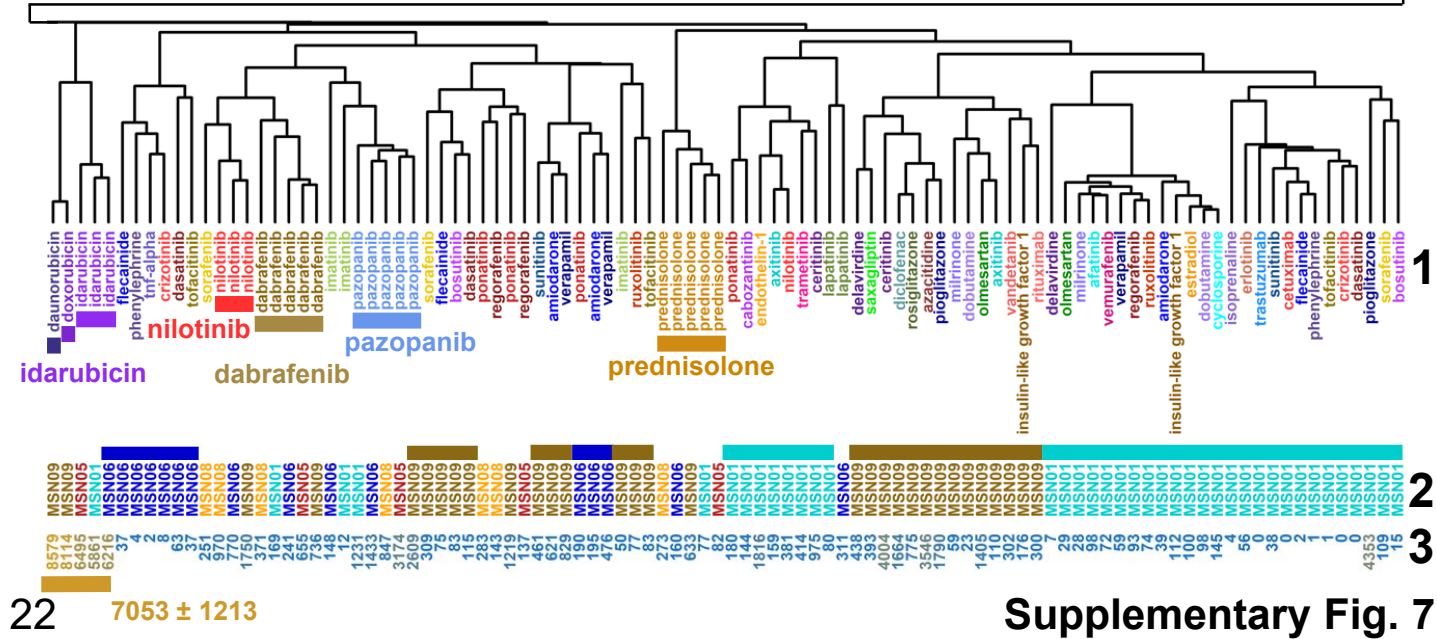

Supplementary Fig. 7

**Supplementary Fig. 7. Clustering of DEGs after removal of first eigenarray.** Removal of the first eigenarray from the complete DEG matrix disrupts hierarchical clustering by the number of significant DEGs (3).

## Complete dataset

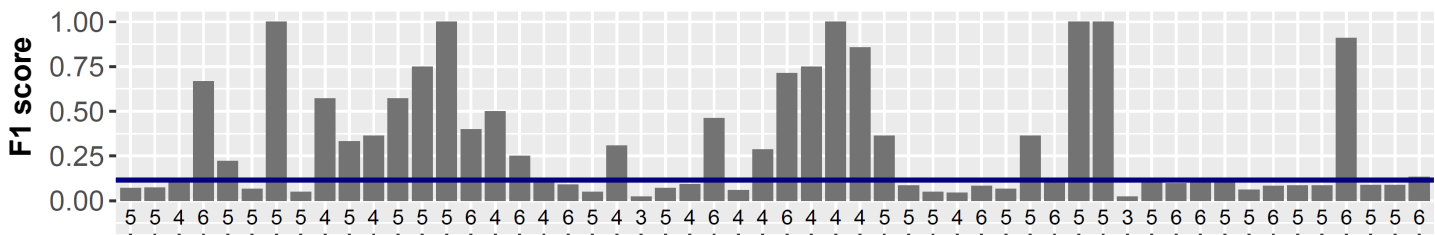

## After removal of 1<sup>st</sup> eigenarray

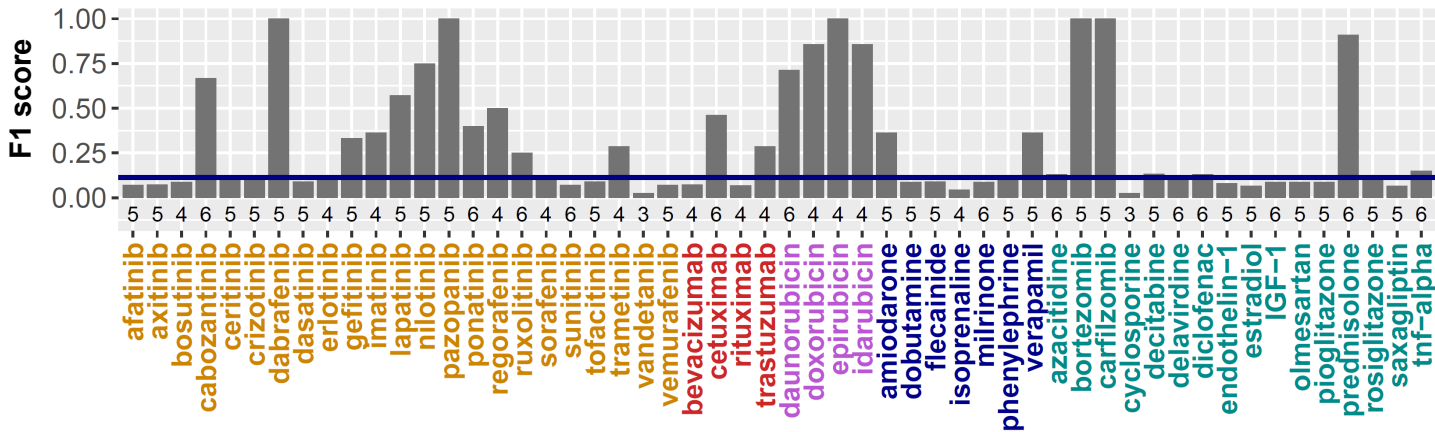

## Supplementary Fig. 8

**Supplementary Fig. 8. Clustering efficiency after removal of the first eigenarray.** DEG matrix after removal of the first eigenarray was subjected to pairwise correlation analysis and hierarchical clustering, followed by calculation of the highest F1 scores for each drug (bottom figure). Numbers of treated cell lines are shown below the bars. To allow easier comparison, we added the F1 scores calculated for each drug using the complete DEG profiles (top figure) that is also shown in Fig. 1C.

A

### 266 coefficients for each eigenarray

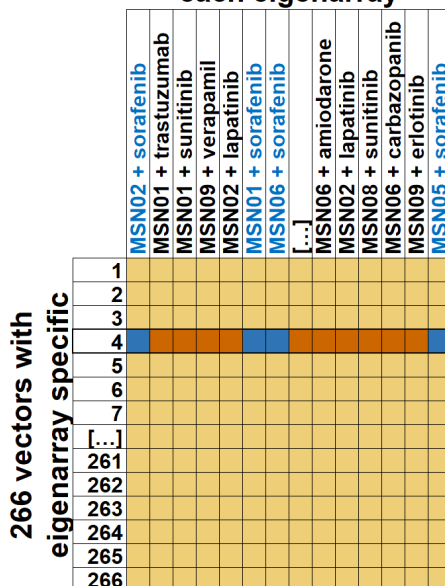

For each drug and eigenarray:

Use two-sided student's t-test to investigate if the coefficients for an eigenarray of interest significantly differ between all samples of a drug of interest and all other samples.



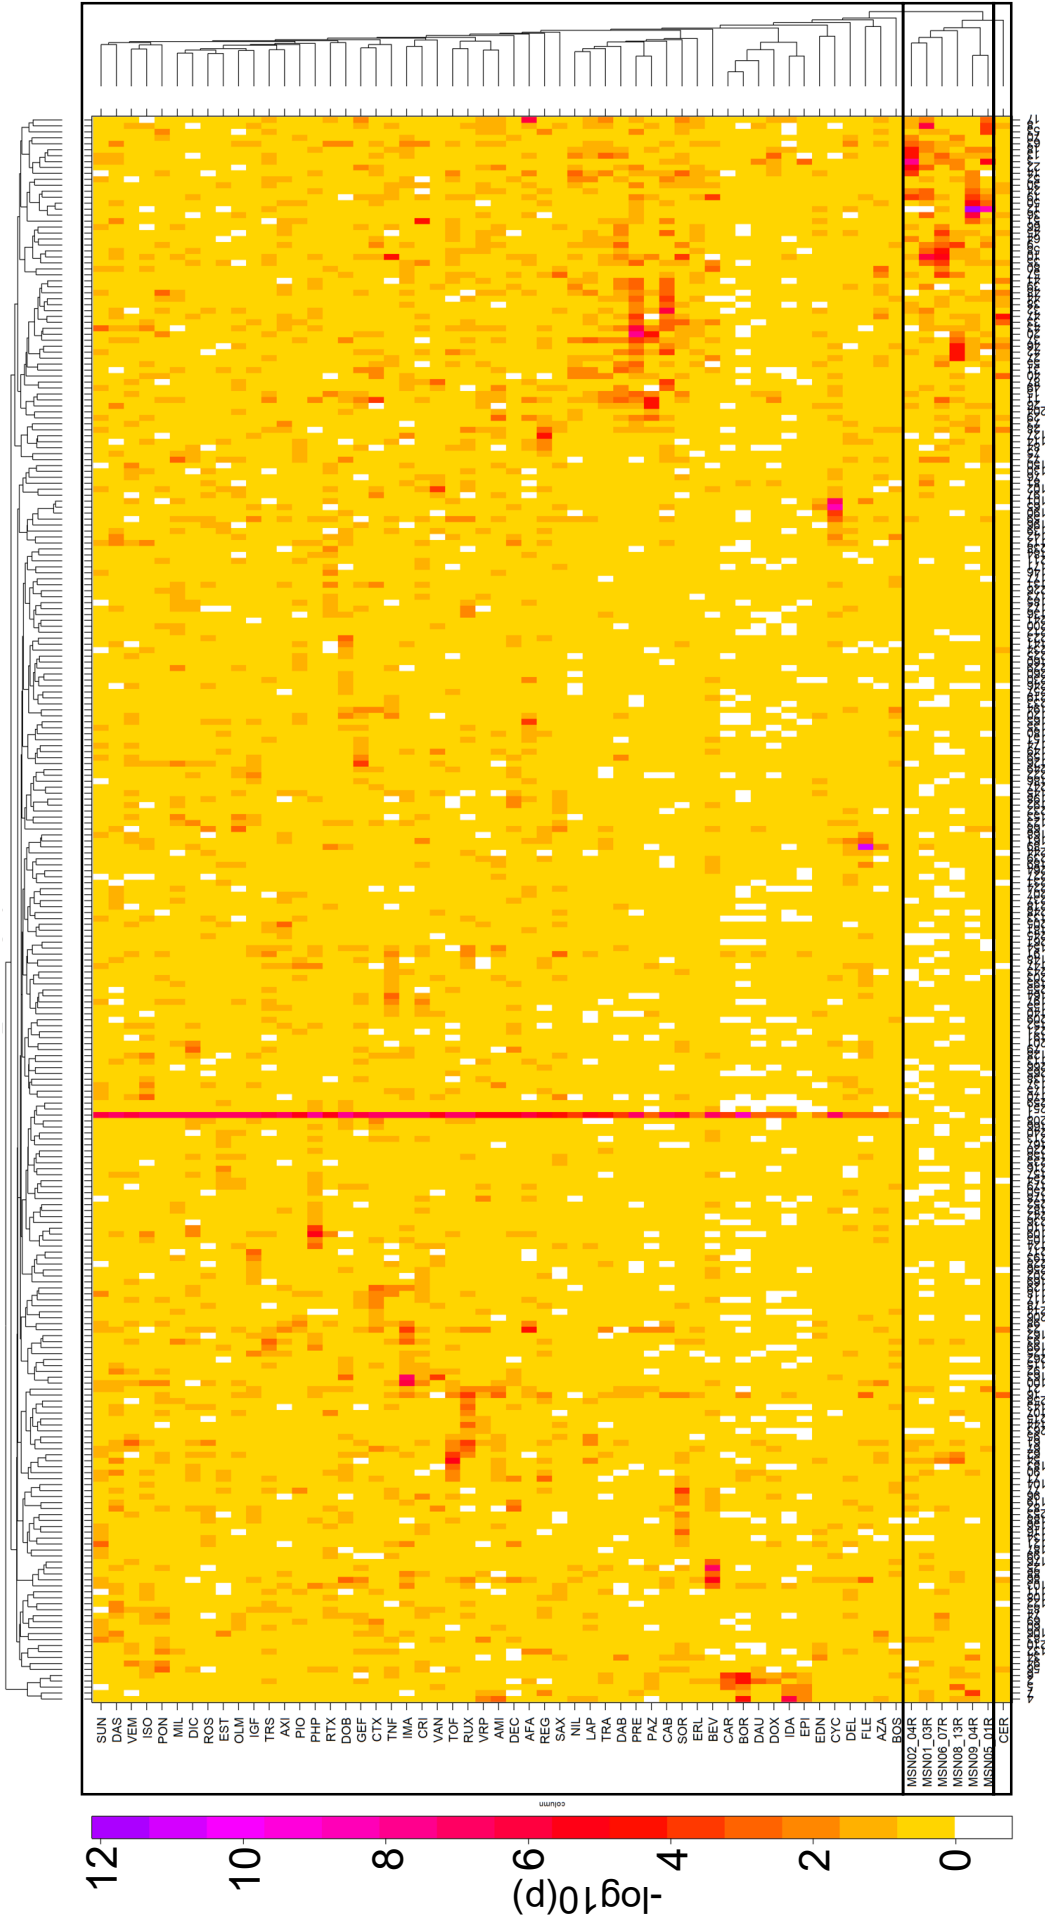

Eigenarray numbers

**Supplementary Fig. 9. Cell-line- and drug-selective effects are captured by different eigenarrays. (A)** For each eigenarray and drug, we analyzed if the coefficients that are related to the gene expression profiles for that drug on that eigenarray significantly differ from all other coefficients on that eigenarray. Consequently, we calculated one p-value for each drug-eigenarray combination. Similarly, we calculated one p-value for each cell line-eigenarray combination. **(B)** All p-values were transformed into  $-\log_{10}(\text{p-values})$  and used to calculate pairwise correlation coefficients between all drugs and cell lines, followed by hierarchical clustering. The initial heatmap of  $-\log_{10}(\text{p-values})$  was rearranged according to the clustering results. Grouping of the six cell lines into a single separated cluster (boxed) suggests that the eigenarray decomposition allows differentiation of cell-line-specific effects from drug-specific effects.

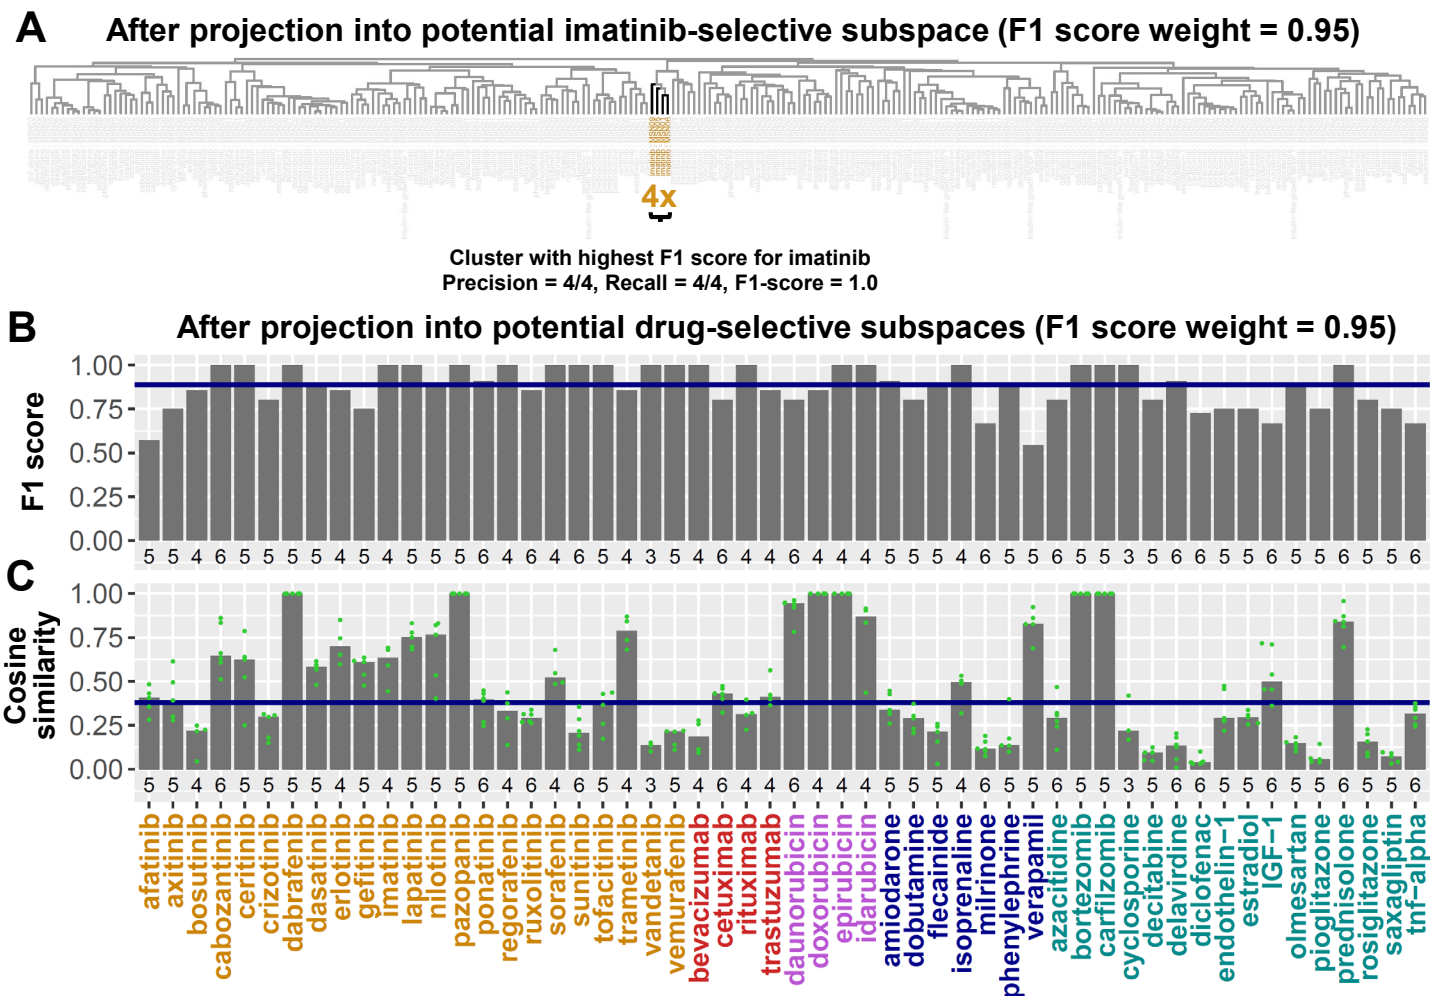

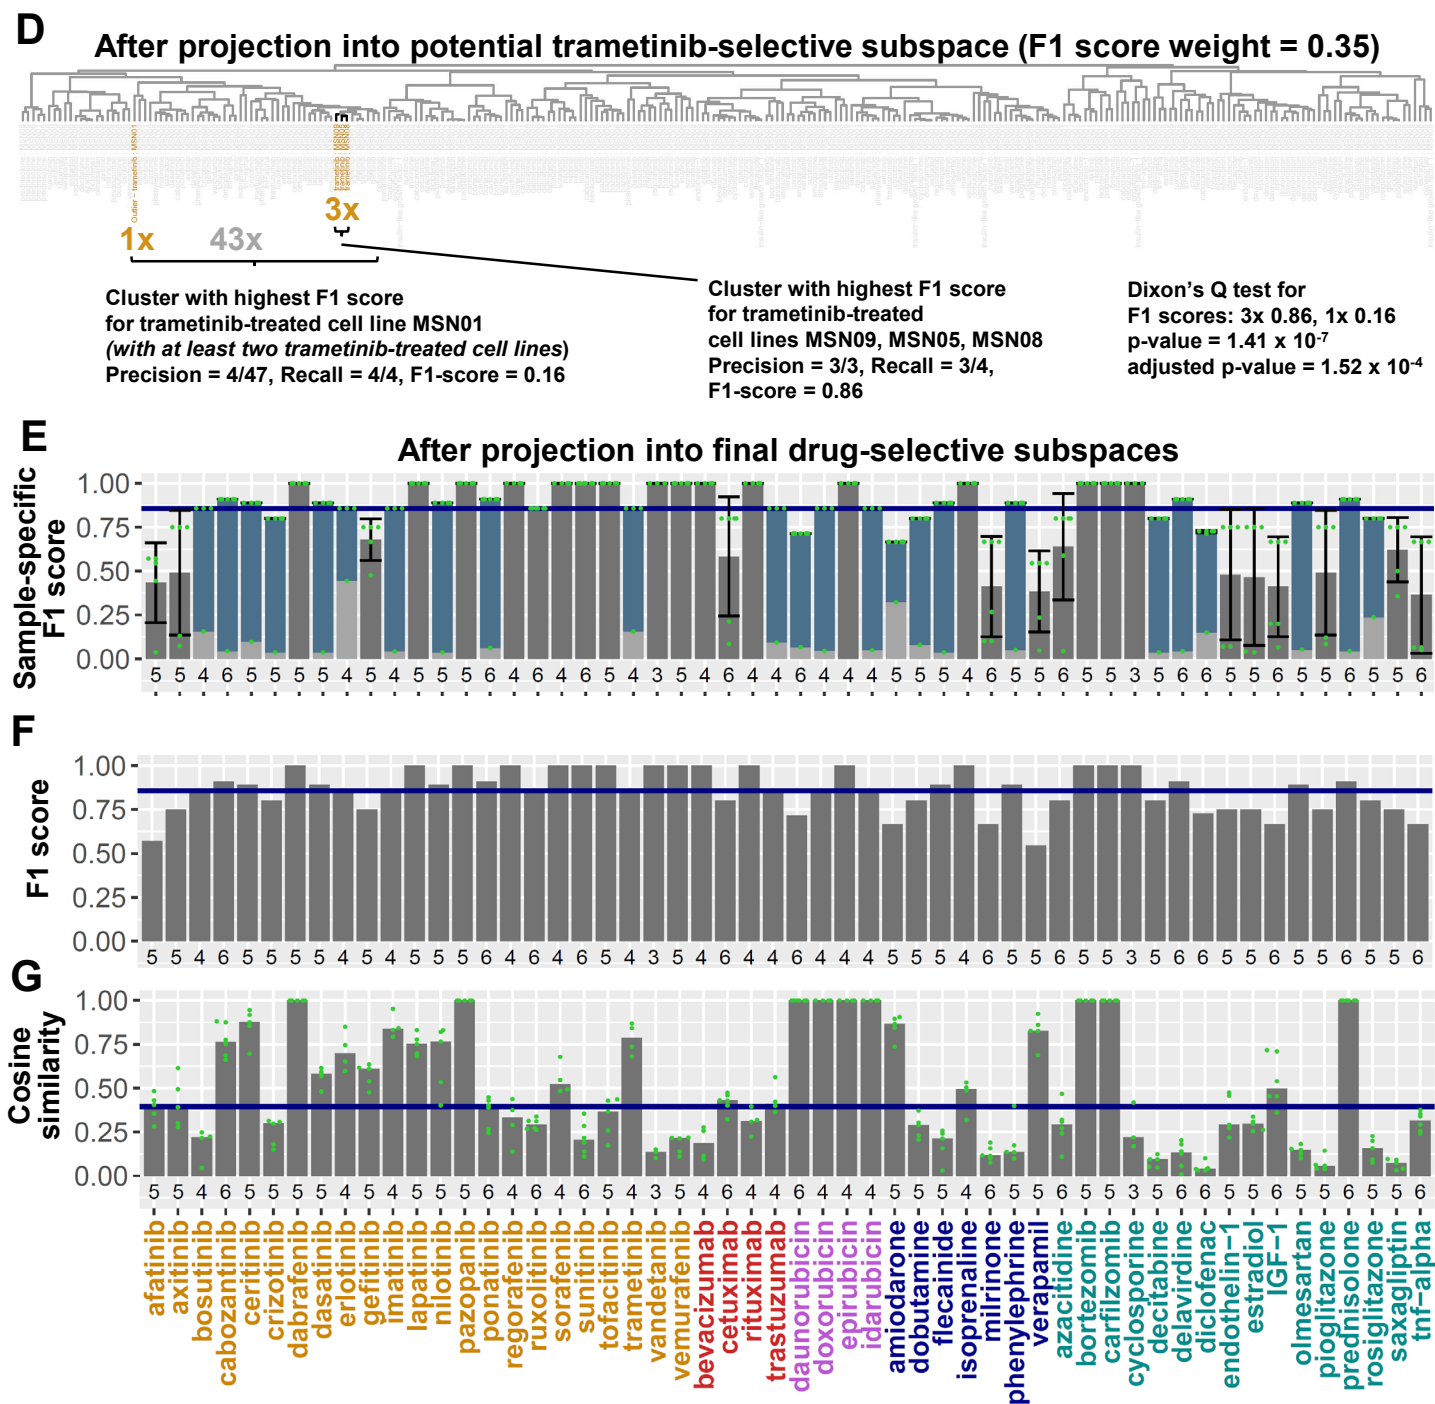

**Supplementary Fig. 10**

**Supplementary Fig. 10. Identification of drug-selective gene expression profiles and outlier responses.** (A) For each drug, we ranked all eigenarrays by their ability to separate the coefficients associated with cell line/drug combinations treated with that drug from all other coefficients, i.e., we ranked them by increasing p-values. The top 3 to 266 eigenarrays were combined to yield 264 potential drug-selective subspaces. Gene expression profiles after removal of the first eigenarray were projected into the subspaces, followed by pairwise correlation, hierarchical clustering and F1 score calculation for the drug

of interest. The example shows the F1 score calculation for imatinib after projection of the data into one of the potential imatinib-selective subspaces. **(B/C)** Cosine similarities between the projected gene expression profiles and the gene expression profiles after removal of the first eigenarray were calculated for each drug. For each potential drug-selective subspace, we calculated weighted averages between the F1 score and the median cosine similarity with changing relative contributions as defined by 20 different F1 score weights (ranging from 0.00 to 0.95 in steps of 0.05). Each F1 score weight allowed us to select one drug-selective subspace, i.e., that subspace with the highest weighted mean or selection score. Shown are **(B)** F1 scores and **(C)** single (green dots) as well as median (bars) cosine similarities obtained based on an F1 score weight of 0.95. Blue lines indicate median heights of all bars. Numbers of treated cell lines are shown below the bars. **(D)** For each drug, we screened all 20 potential drug-selective subspaces (that are defined by different F1 score weights) for subspaces where one cell line/drug combination shows a different transcriptomic response to the drug of interest than all other cell line/drug combinations. We calculated cell line/drug combination-specific F1 scores, using the same approach described above, except that the cell line/drug combination of interest has to be part of the corresponding cluster. Dixon's Q test applied to cell line/drug combination-specific F1 scores was used to identify outliers (adj. p-value  $\leq 0.05$ ). **(E)** F1-scores of non-outlier cell line/drug combinations in the final drug-selective subspaces were averaged. Blue and dark gray bars indicate averaged F1 scores for drugs with and without identified outliers, respectively. Error bars show standard deviations for non-outlier cell line/drug combinations. F1 scores identified for outlier cell line/drug combinations are visualized separately (light gray bars). Green dots show individual drug-selective F1-scores. The larger the difference between the top of the blue and light gray bars, the larger the difference in F1 scores between regular and outlier responses. The blue line indicates the median height of blue and dark gray bars. Numbers of treated cell lines are shown below the bars. **(F)** Projection of gene expression profiles into the final drug-selective subspaces leads to a great increase in drug-specific F1 scores. Notice that the F1 scores are the maximum cell line/drug combination-specific F1-scores shown in E. This figure is the same as figure 1D. **(G)** Cosine similarities (green dots) and median cosine similarities (bars) between complete DEG profiles and DEG profiles in final drug-selective subspaces are shown. The blue line shows the median height of all bars.

**Supplementary Fig. 11: Clustering results for each drug after removal of the first eigenarray and in the final drug-selective subspaces. See pages 79 - 93.**

**Supplementary Fig. 12: Identification of outlier responses. See pages 94 - 97.**

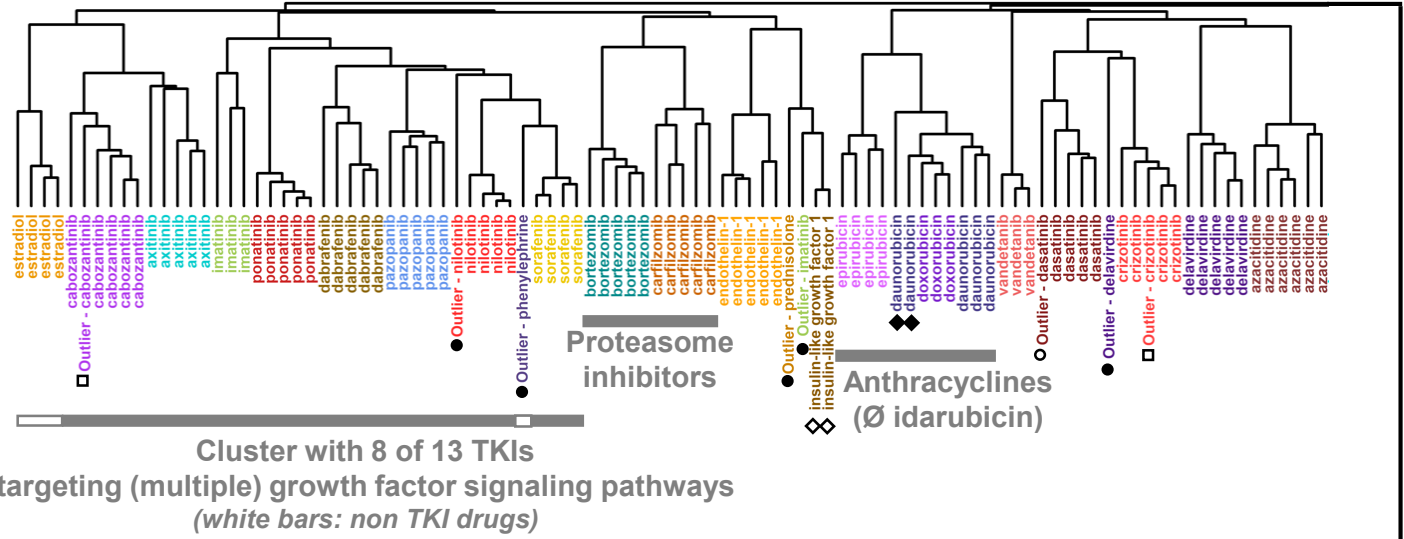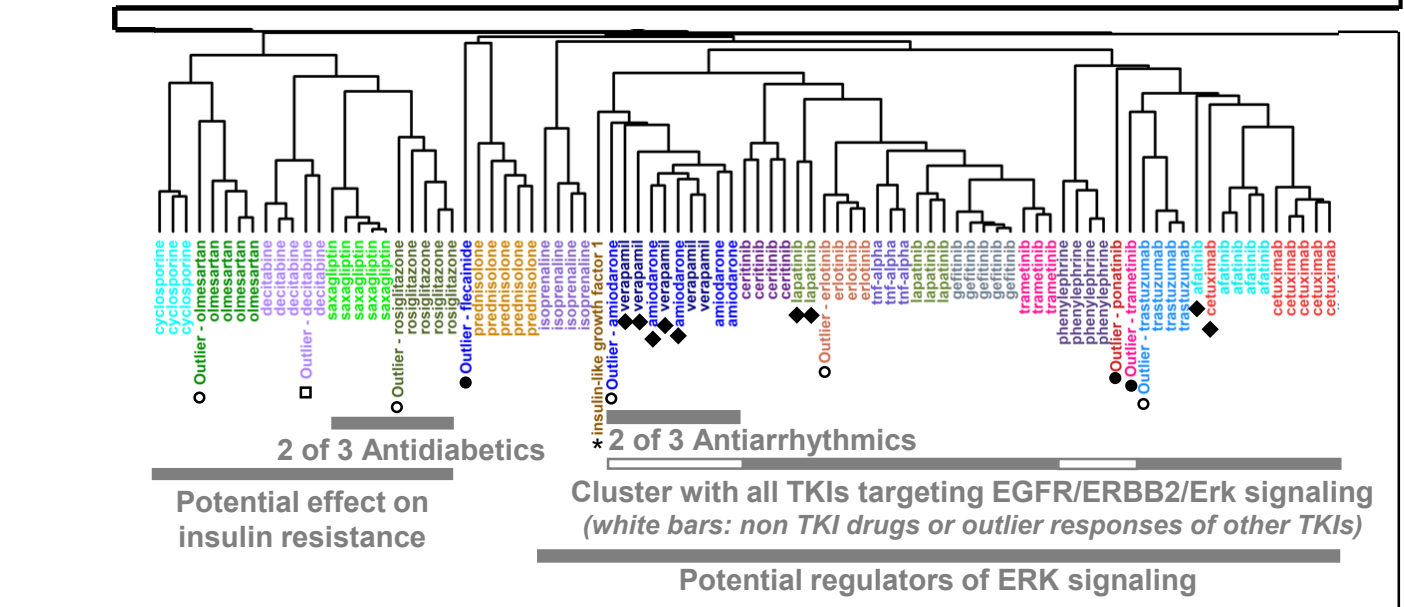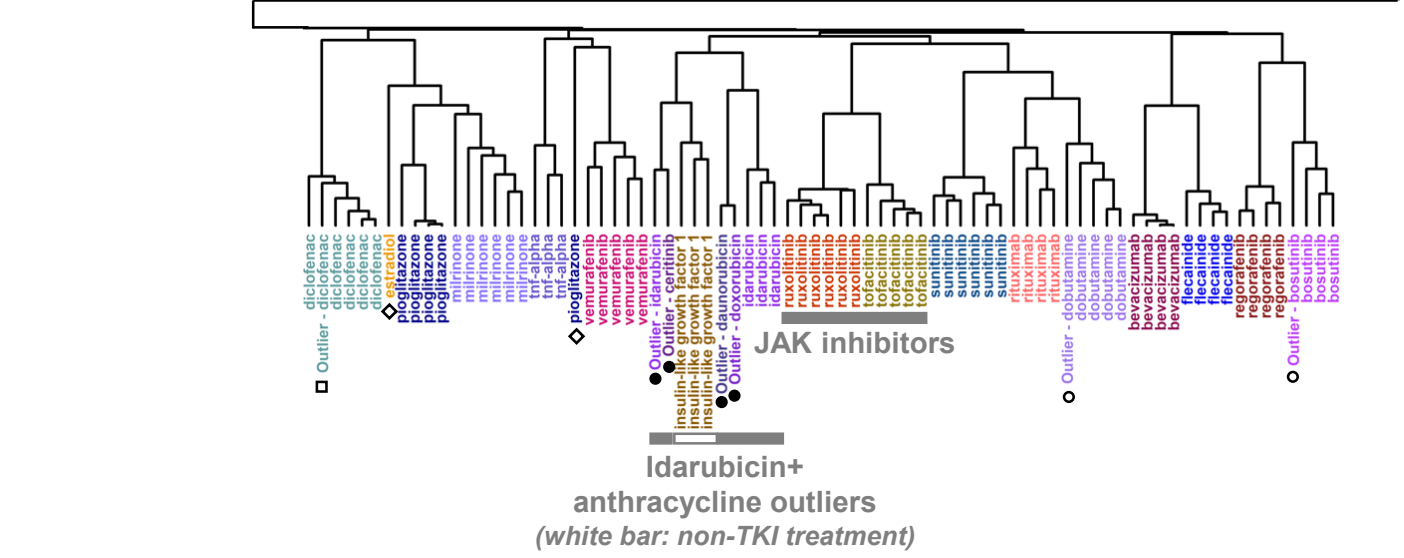

**Supplementary Fig. 13. Clustering of merged drug-selective gene expression profiles.** Drug-selective gene expression profiles obtained after projection of the complete gene expression matrix into drug-selective subspaces were merged, followed by pairwise correlation and hierarchical clustering. Outlier cell line/drug combinations are labeled with 'Outlier'. Closed circles label outlier responses that show great outlier characteristics in this dendrogram as well, and do not cluster together with the other cell line/drug combinations treated with the same drugs. Open circles label outlier responses with minor outlier characteristics in this dendrogram, i.e., those outliers that are grouped together with the cell line/drug combinations treated with the same drug in a larger cluster, but get separated from them after sub-clustering. Closed squares label outlier responses that are grouped together with the cell line/drug combinations treated with the same drug. Asterisks label cell line/drug combinations that do not cluster together with the other cell line/drug combinations treated with the same drug and were not identified as outlier responses. Bars label clusters that are composed of cell line/drug combinations from different drugs with closely related potential mechanisms. Fig. 1E shows the same dendrogram, drug labels and most of the bars.

**A**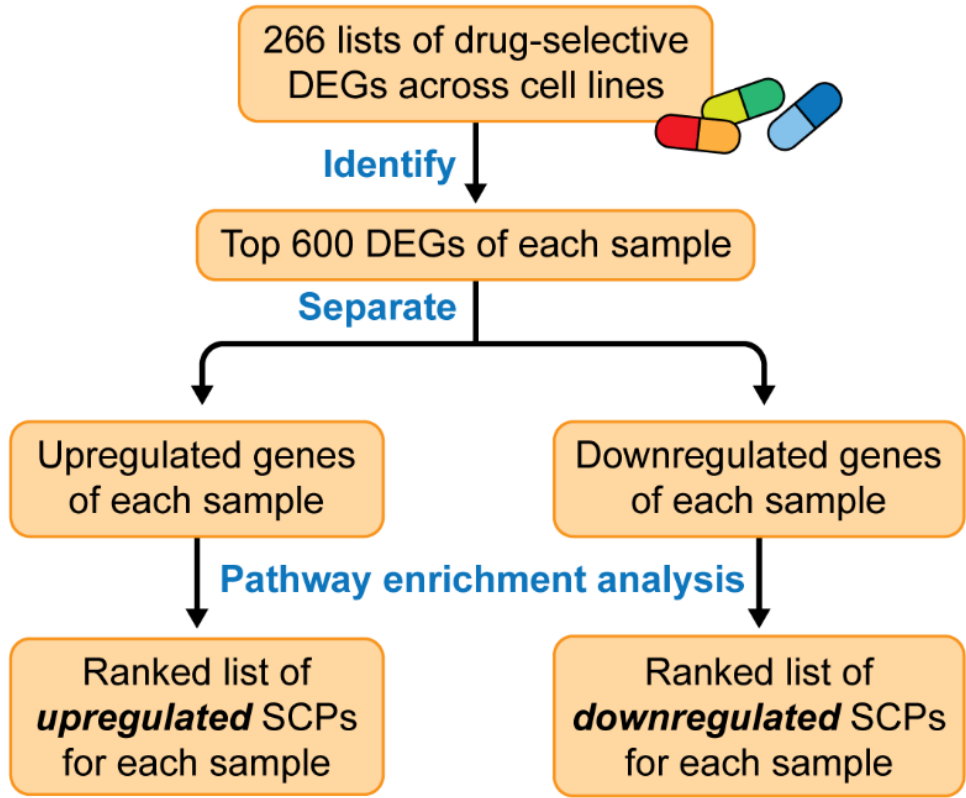**Supplementary Fig. 14**

**Supplementary Fig. 14. Top Subcellular Processes predicted from complete gene expression profiles, after removal of first eigenarray and from drug-selective gene expression profiles. (A)** Complete, decomposed gene expression profiles and gene expression profiles after removal of the first eigenarray were subjected to pathway enrichment analysis using the Molecular Biology of the Cell Ontology and Fisher’s Exact Test to identify up- and downregulated subcellular processes (SCPs). Flow chart is used with permission from Mount Sinai Health System, licensed under CC BY.

**Supplementary Figs. 14B-E: Top Subcellular Processes predicted from complete gene expression profiles, after removal of first eigenarray and from drug-selective gene expression profiles.**

14B: MBCO level-1 SCPs: pages 98 - 111

14C: MBCO level-2 SCPs: pages 112 - 125

14D: MBCO level-3 SCPs: pages 126 - 139

14E: MBCO level-3 SCPs: pages 140 - 154



**A**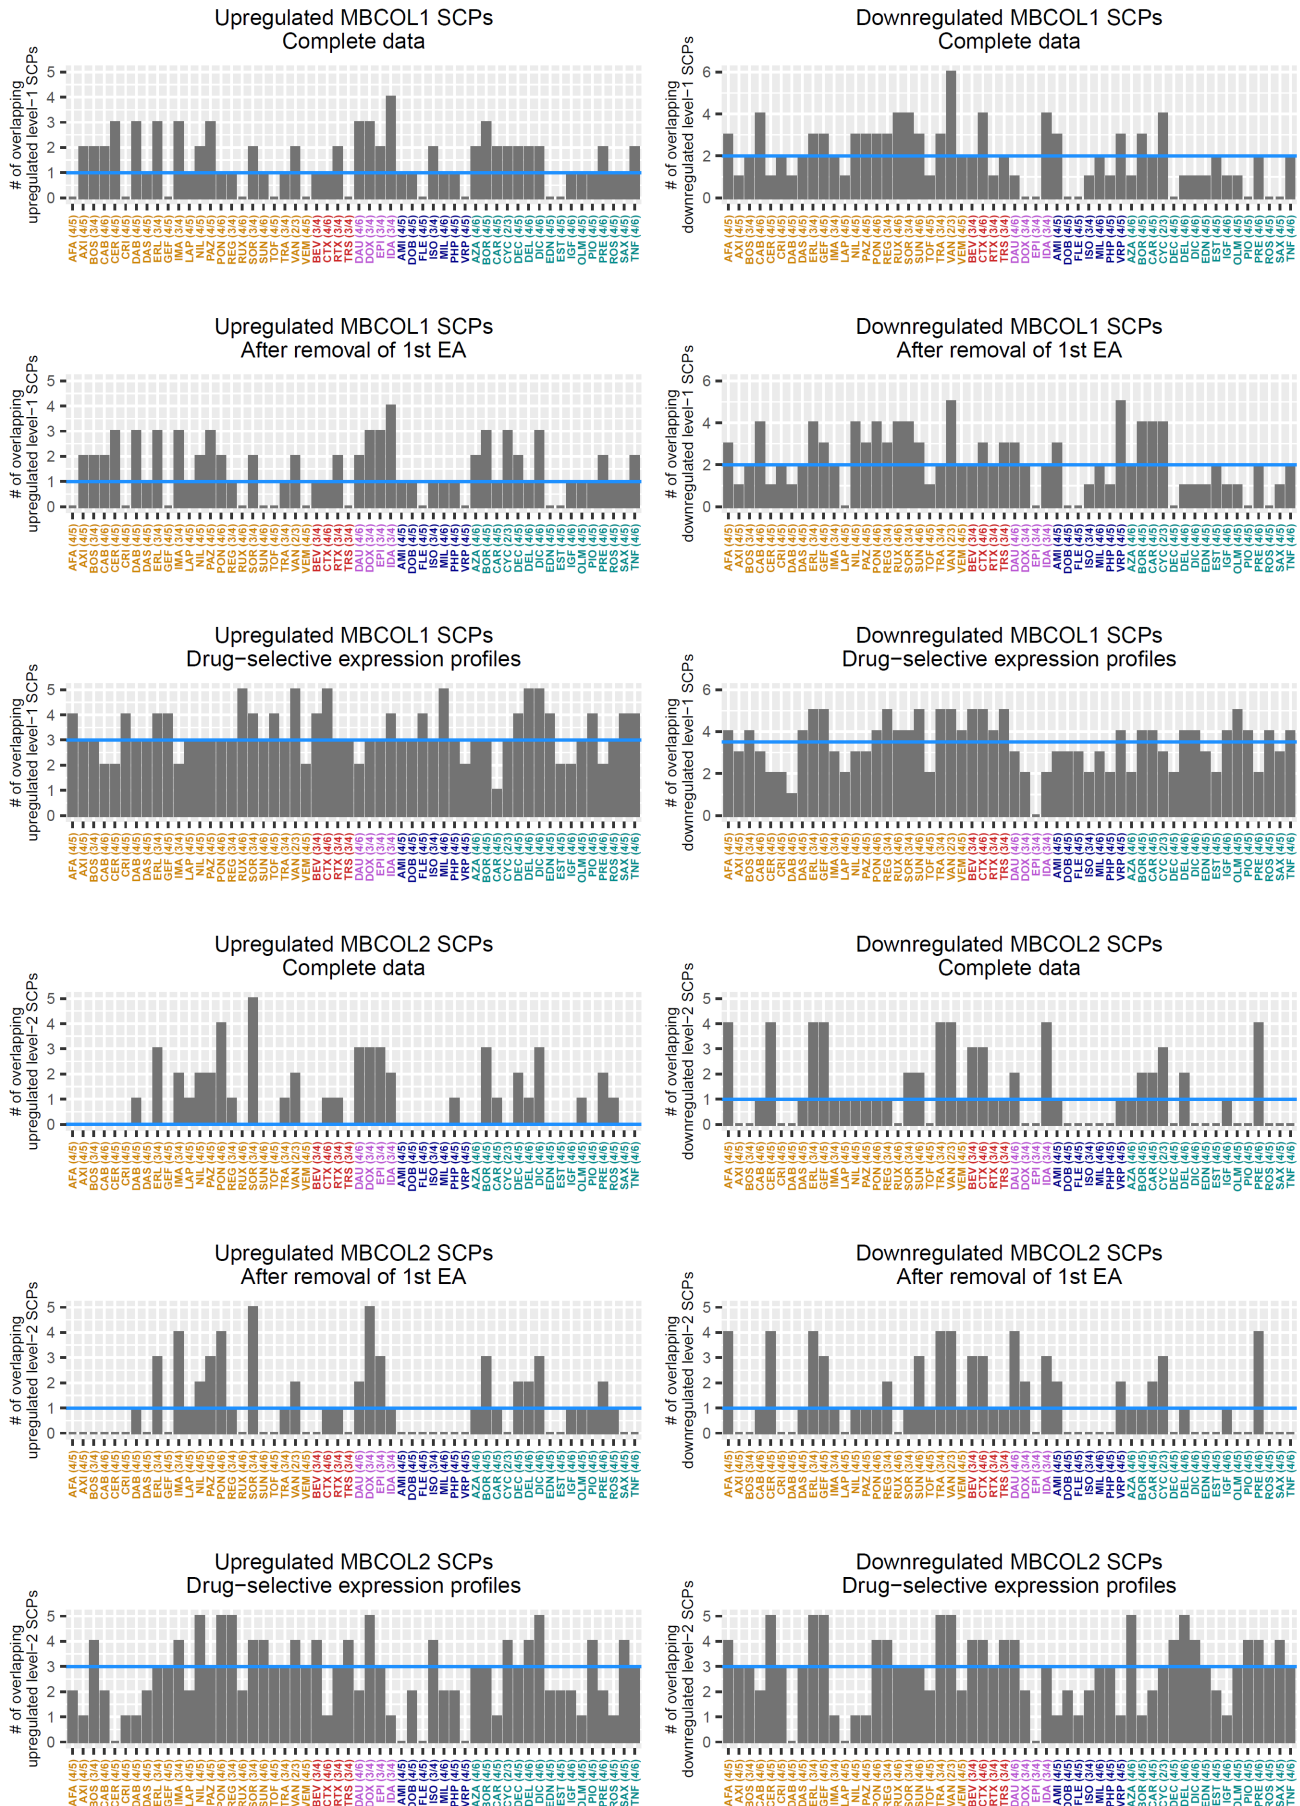

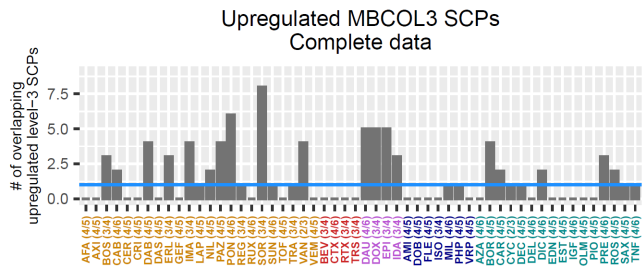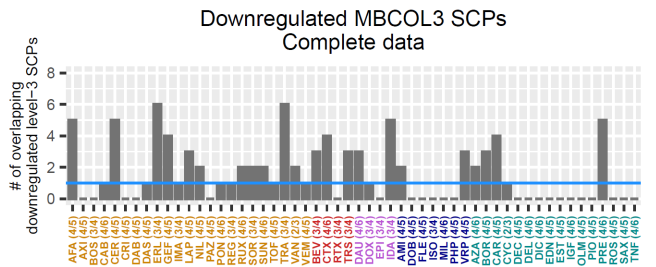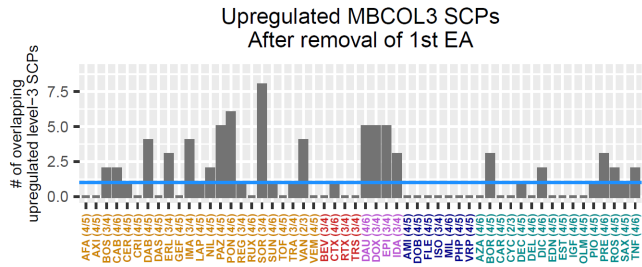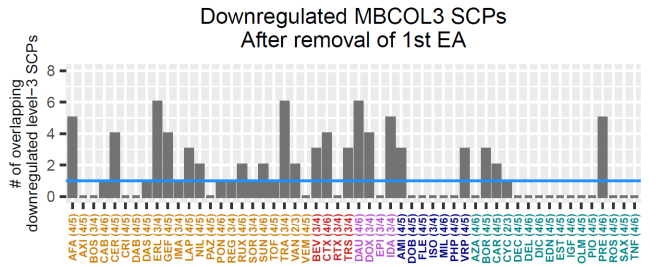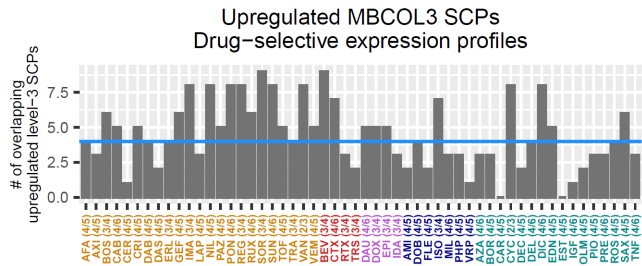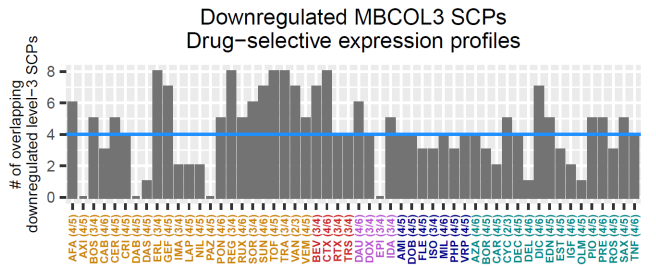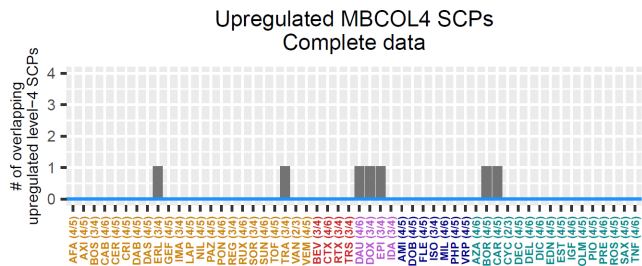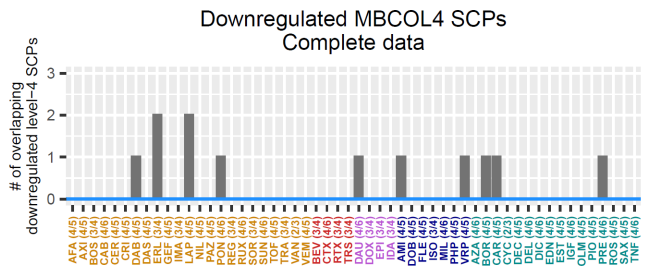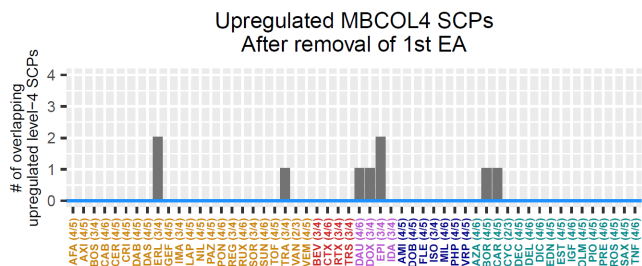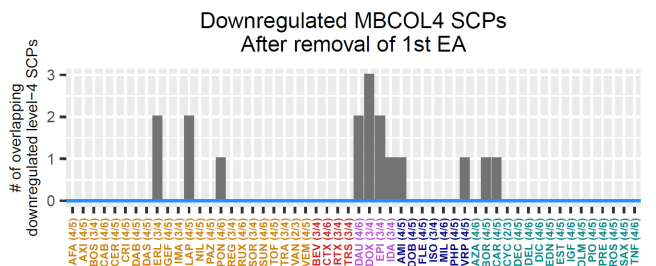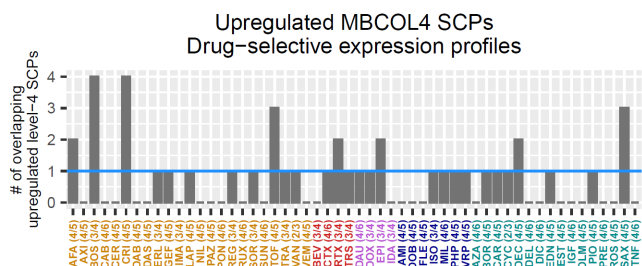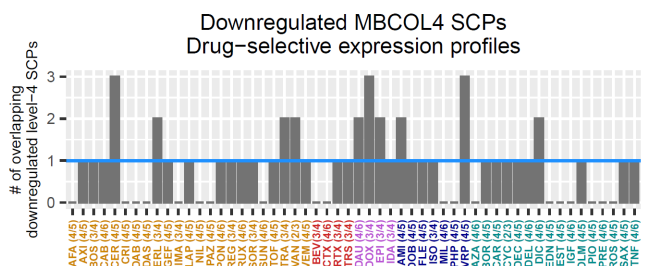

**B**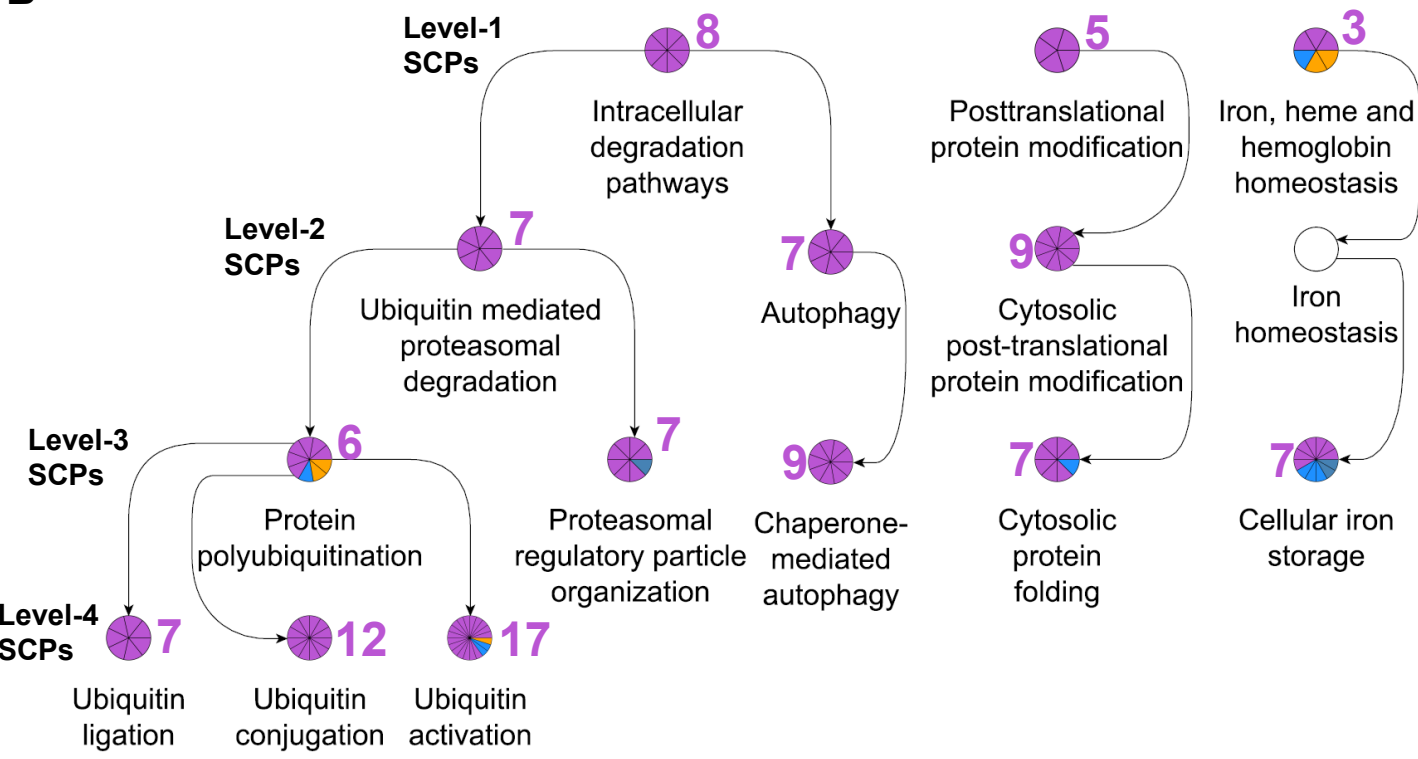**C**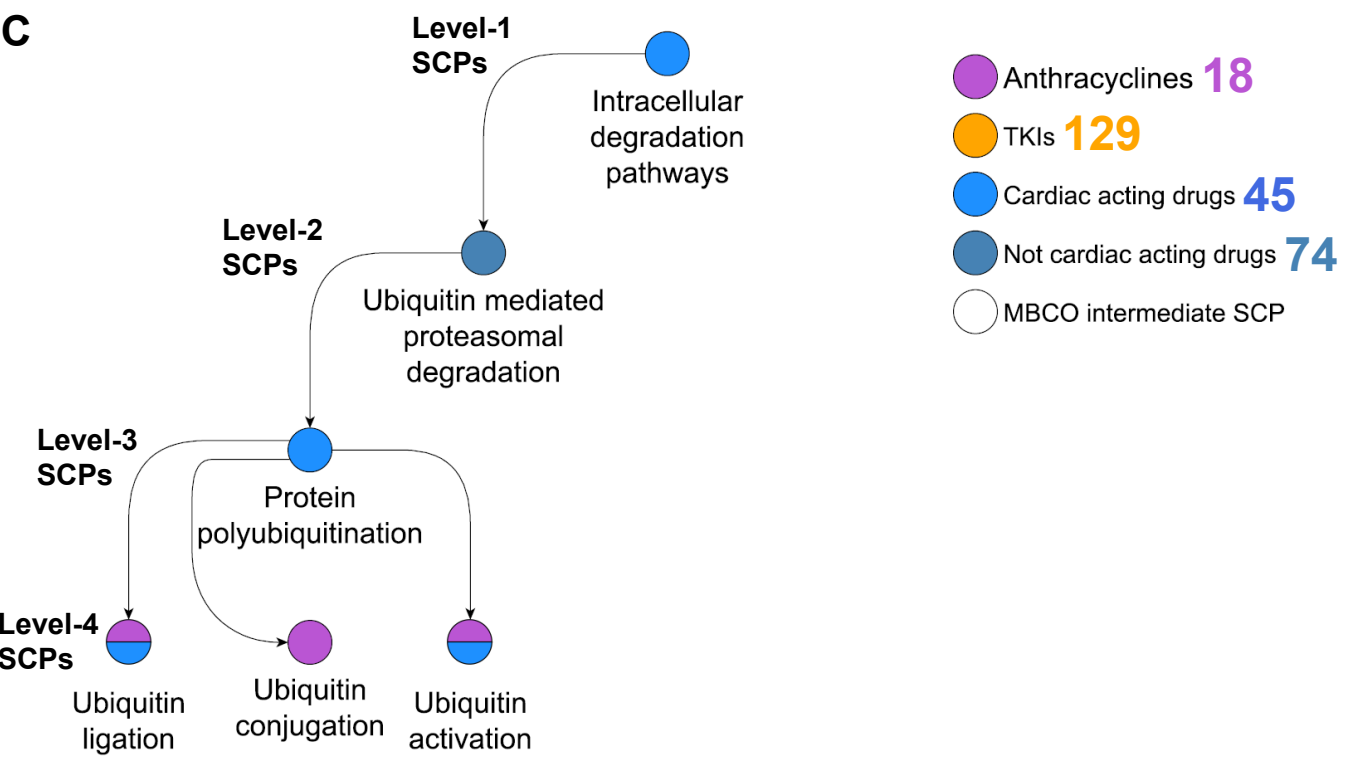

**Supplementary Fig. 15. SVD decomposition increases the consistency of identified SCPs by the same drug across different cell lines and reveals potentially cardiotoxic SCPs. (A)** We analyzed, for each drug, how many up- or downregulated level-1, -2, -3 and -4 SCPs were predicted in at least 66% of all treated cell lines with a maximum rank of five, five, ten and five, respectively. The minimum numbers that equal or exceed 66% and the total numbers of treated cell lines are given as nominators and denominators, respectively, in brackets after the drug abbreviations. The blue line documents the median of overlapping SCP counts. For drug abbreviations see Supplementary Data 3. **(B)** The top five, five, ten and five level-1, -2, -3 and -4 SCPs predicted from downregulated genes in the drug-selective gene expression profiles were integrated into the MBCO hierarchy. Selected SCPs in parent-child relationships (arrows) are shown. Any drug that downregulates an SCP is added as a new pie slice colored according to the drug's class. Purple numbers next to the SCPs indicate the number of anthracycline-treated cell line/drug combinations for which the SCP was predicted (i.e., the number of purple slices). Numbers next to the drug classes in the legend indicate how many cell line/drug combinations were treated with drugs of that class in total. **(C)** The top five, five, ten and five level-1, -2, -3 and -4 SCPs predicted from downregulated genes in the complete gene expression profiles were integrated into the MBCO hierarchy, as described in B. The same SCPs are shown, if predicted.

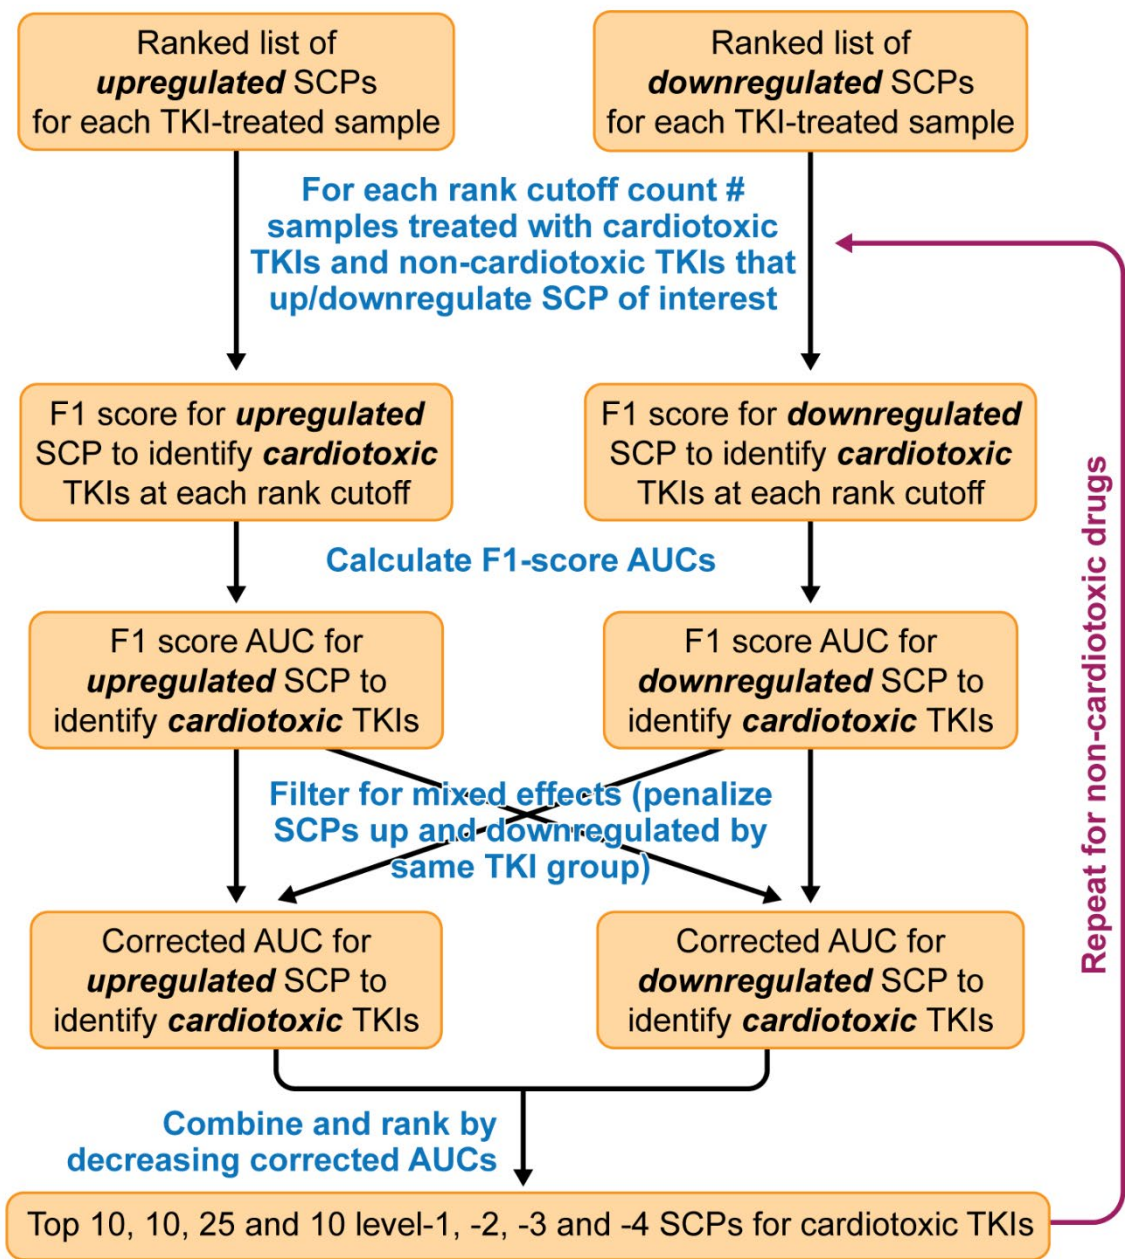

**Supplementary Fig. 16**

**Supplementary Fig. 16. Identification of SCPs associated with cardiotoxic and non-cardiotoxic TKIs.** SCPs that were predicted from pathway enrichment analysis of drug-selective gene expression profiles were subjected to our computational pipeline that searches for SCPs associated with a cardiotoxic or non-cardiotoxic response to TKI treatment. See methods for details. Flow chart is used with permission from Mount Sinai Health System, licensed under CC BY.

**Supplementary Fig. 17. F1 score and Area Under the Curve statistics.** See pages 155 - 173.

Up/Downregulated at higher ranks by  
cardiotoxic drugs      non-cardiotoxic drugs

Level-3 SCPs

| Biological Process                                        | Upregulated by cardiotoxic drugs | Downregulated by cardiotoxic drugs | Upregulated by non-cardiotoxic drugs | Downregulated by non-cardiotoxic drugs |
|-----------------------------------------------------------|----------------------------------|------------------------------------|--------------------------------------|----------------------------------------|
| Thin myofilament organization                             | 21                               | 19                                 |                                      |                                        |
| Myofibril formation                                       | 6                                | 6                                  |                                      |                                        |
| Potassium TM transport                                    | 7                                |                                    |                                      |                                        |
| Gap junction organization                                 | 24                               |                                    |                                      |                                        |
| Chloride TM transport                                     | 17                               |                                    |                                      |                                        |
| Water TM transport                                        | 9                                | 2                                  |                                      |                                        |
| Citric acid cycle                                         | 1                                |                                    |                                      |                                        |
| Glycolysis and Gluconeogenesis                            |                                  |                                    | 25                                   |                                        |
| Polyol pathway                                            | 4                                |                                    |                                      |                                        |
| Serine and glycine metabolism                             | 19                               | 5                                  |                                      |                                        |
| Aspartate and arginine metabolism                         |                                  |                                    | 12                                   |                                        |
| Transamination pathways                                   | 25                               |                                    |                                      |                                        |
| GABA metabolism                                           |                                  |                                    | 18                                   |                                        |
| Desaturation of fatty acids                               | 11                               |                                    |                                      |                                        |
| Cholesterol-sensitive control of SREBP activation         | 15                               | 24                                 |                                      |                                        |
| Cholesterol synthesis                                     | 22                               | 3                                  |                                      |                                        |
| Cellular cholesterol uptake and efflux                    | 23                               |                                    |                                      |                                        |
| Cellular iron uptake and export                           |                                  |                                    | 23                                   |                                        |
| Natriuretic peptide receptor signaling                    |                                  |                                    | 15                                   |                                        |
| Prostaglandin E2 receptor signaling                       |                                  |                                    | 21                                   |                                        |
| Adrenergic receptor signaling                             | 8                                |                                    |                                      |                                        |
| Hippo signaling                                           | 13                               |                                    |                                      |                                        |
| Thyroid hormone receptor signaling                        | 10                               |                                    |                                      |                                        |
| PDGF receptor signaling                                   | 14                               |                                    |                                      |                                        |
| VEGF receptor signaling                                   | 12                               | 9                                  |                                      |                                        |
| HIF-1 receptor signaling pathway                          | 20                               |                                    |                                      |                                        |
| Leptin receptor signaling                                 | 5                                | 1                                  |                                      |                                        |
| GCSF receptor signaling                                   | 16                               | 8                                  |                                      |                                        |
| Oncostatin-M receptor signaling                           |                                  |                                    | 10                                   |                                        |
| Collagen fiber crosslinking                               |                                  |                                    | 7                                    |                                        |
| Collagen fibril organization by fibril-associated bridges |                                  |                                    | 17                                   |                                        |
| Elastin cross-linking and assembly                        |                                  |                                    | 16                                   |                                        |
| Biglycan synthesis                                        | 18                               | 13                                 |                                      |                                        |
| Amyloid degradation, uptake and aggregation inhibition    |                                  |                                    | 11                                   |                                        |
| Lysosomal glycoprotein degradation                        | 2                                |                                    |                                      |                                        |
| Epithelial intermediate filament dynamics                 |                                  |                                    | 20                                   |                                        |
| Axonal intermediate filament dynamics                     |                                  |                                    | 14                                   |                                        |
| Restriction point                                         | 3                                | 4                                  |                                      |                                        |
| Inhibition of apoptosis                                   |                                  |                                    | 22                                   |                                        |

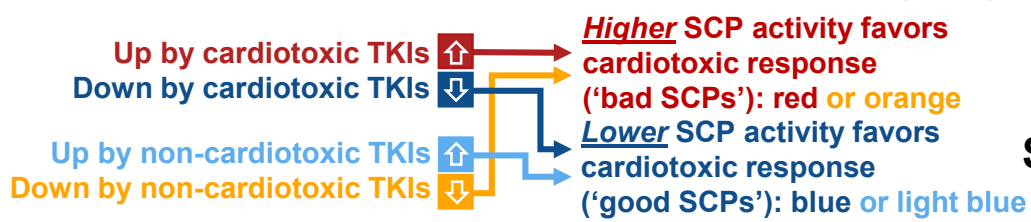

Supplementary Fig. 18

Up/Downregulated at higher ranks by  
**cardiotoxic drugs**      **non-cardiotoxic drugs**

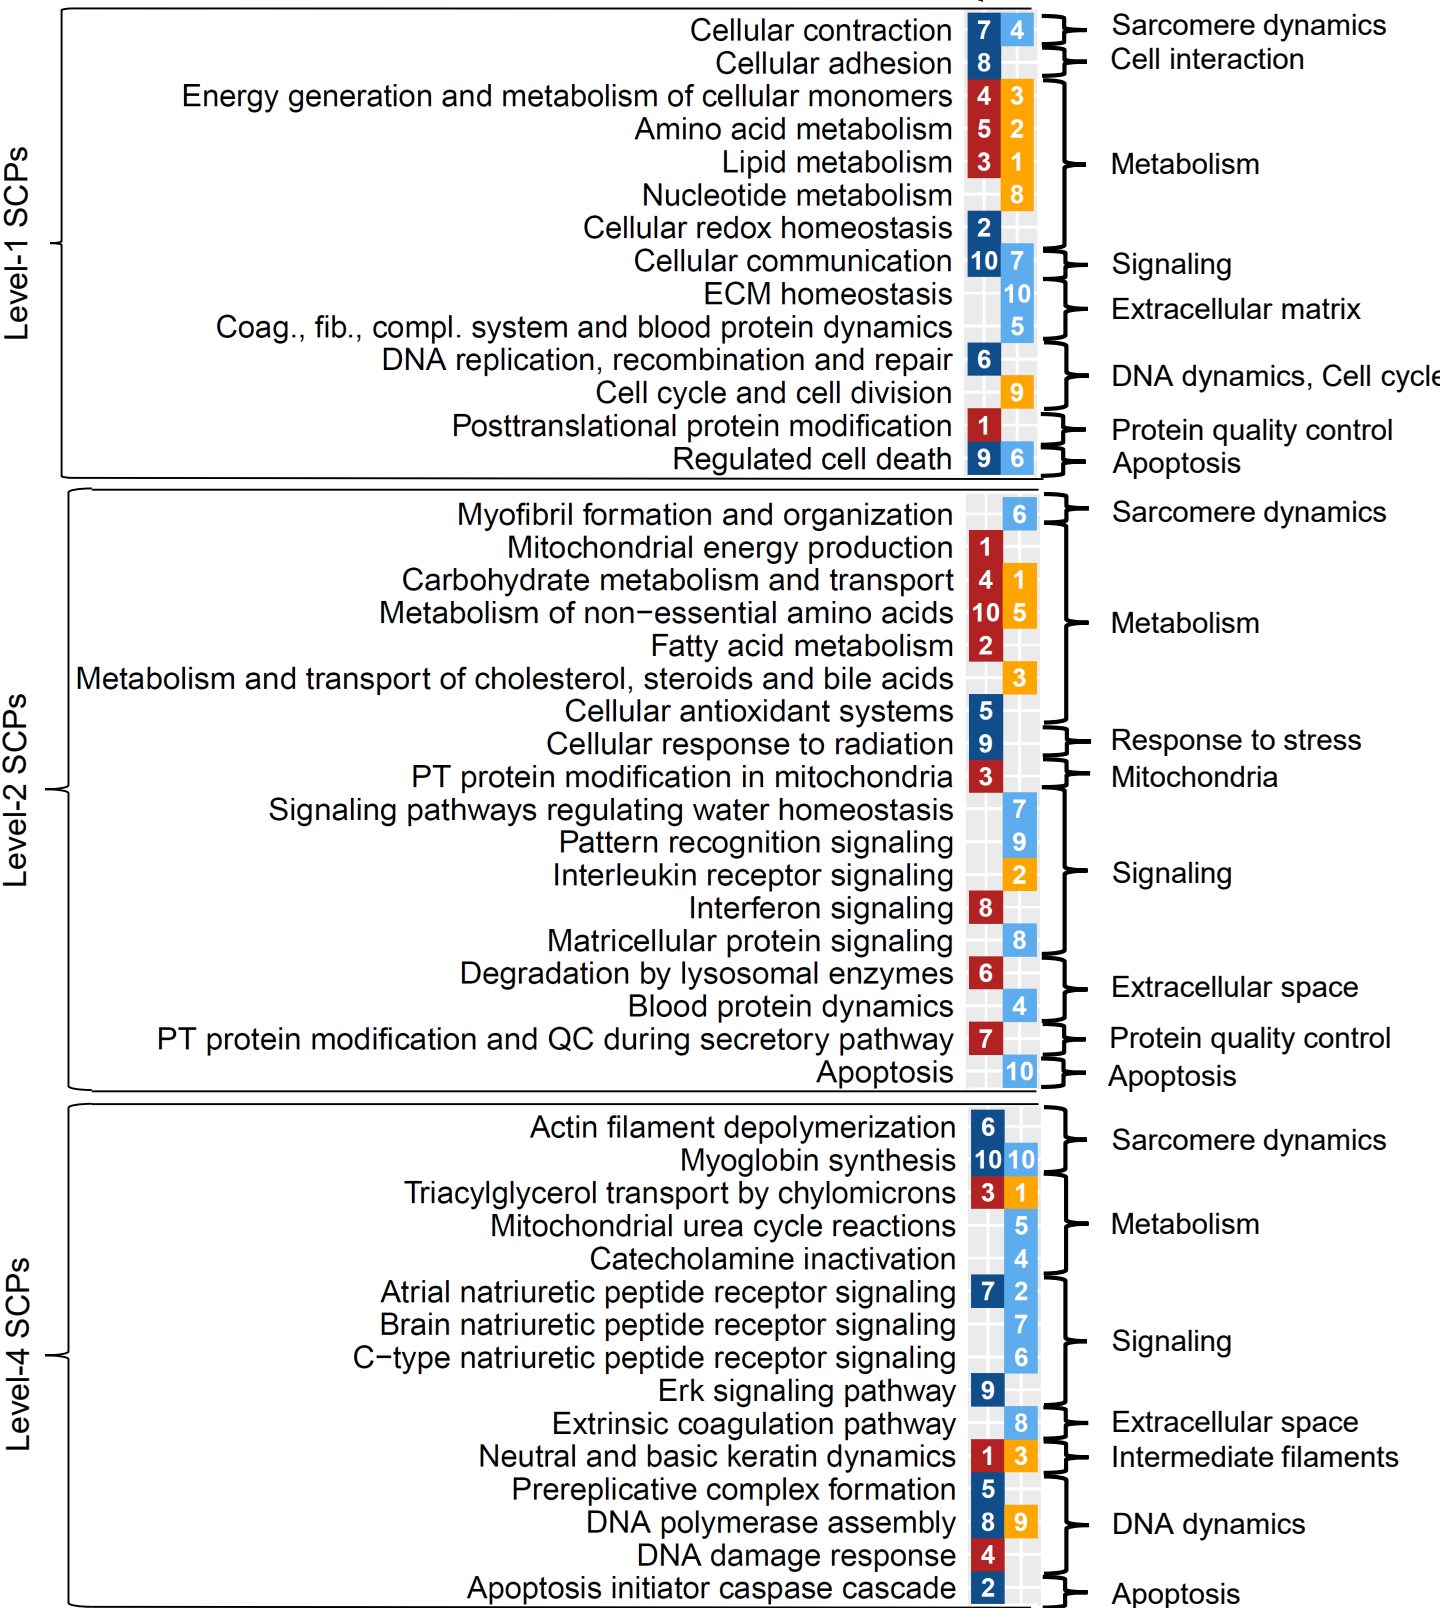

**Up by cardiotoxic TKIs** ↑ **Down by cardiotoxic TKIs** ↓  
**Up by non-cardiotoxic TKIs** ↑ **Down by non-cardiotoxic TKIs** ↓

**Higher SCP activity favors cardiotoxic response ('bad SCPs'): red or orange**  
**Lower SCP activity favors cardiotoxic response ('good SCPs'): blue or light blue**

**Supplementary Fig. 18. SCPs associated with cardiotoxic and non-cardiotoxic responses.** Predicted up- and downregulated subcellular processes (SCPs) of the same level were ranked by significance for each drug and cell line. We searched for those SCPs that are up- or downregulated at higher significance ranks by cardiotoxic or non-cardiotoxic TKIs. Identified SCPs were ranked by their selectivity for either cardiotoxic or non-cardiotoxic drugs (white numbers). To simplify our findings, we defined that SCPs that are upregulated by cardiotoxic drugs (red) or downregulated by non-cardiotoxic drugs (orange) are associated with a cardiotoxic response after upregulation or at baseline level, respectively. For these SCPs a higher activity favors a cardiotoxic response. Similarly, we defined that SCPs downregulated by cardiotoxic (dark blue) or upregulated by non-cardiotoxic drugs (light blue) are associated with a non-cardiotoxic response after downregulation or at baseline level, respectively. For these SCPs a lower activity favors a cardiotoxic response. Shown are the top 25, 10, 10 and 10 predicted level-3, -1, -2 and -4 SCPs for cardiotoxic and non-cardiotoxic TKIs. The level-3 SCPs that are up- or downregulated by cardiotoxic TKIs are also shown in Fig. 2B.



# Muscle contractility

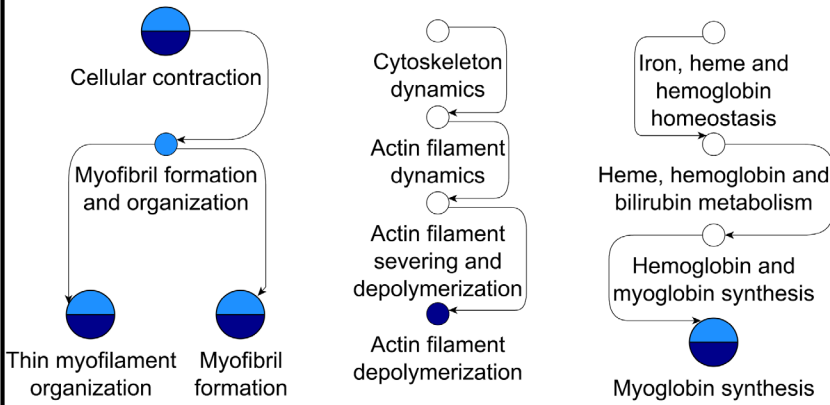

# Electric transmission

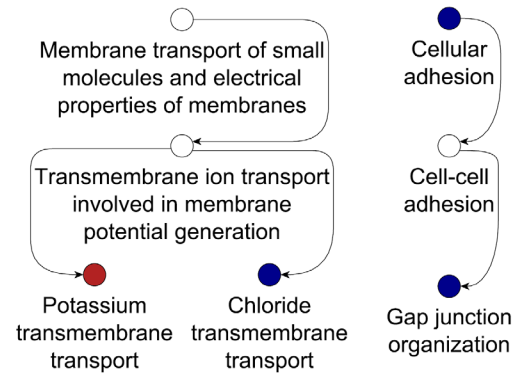

# Metabolism

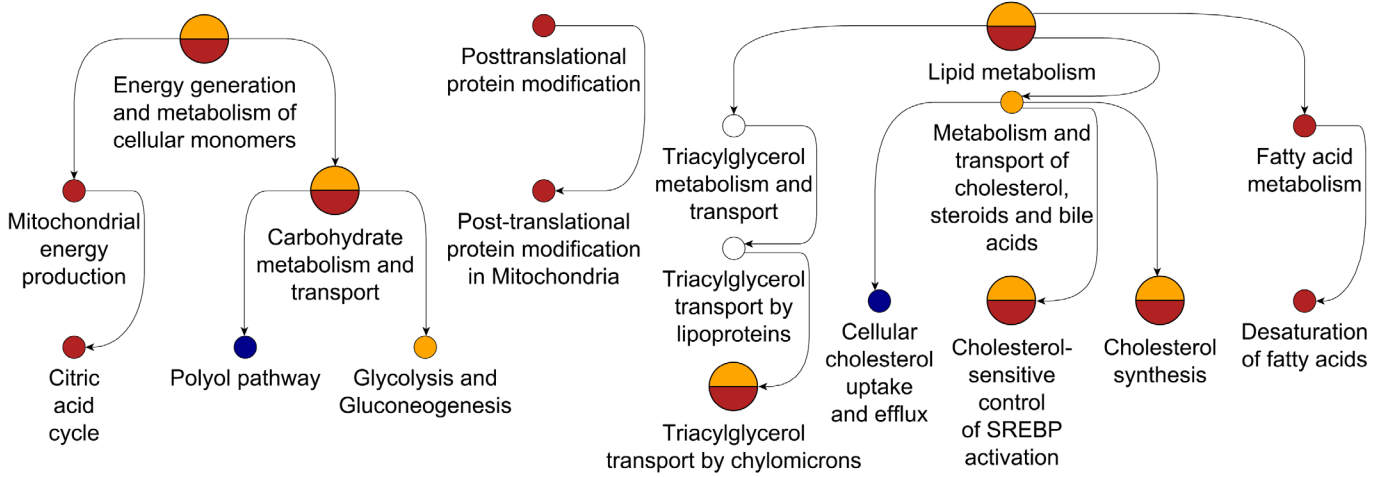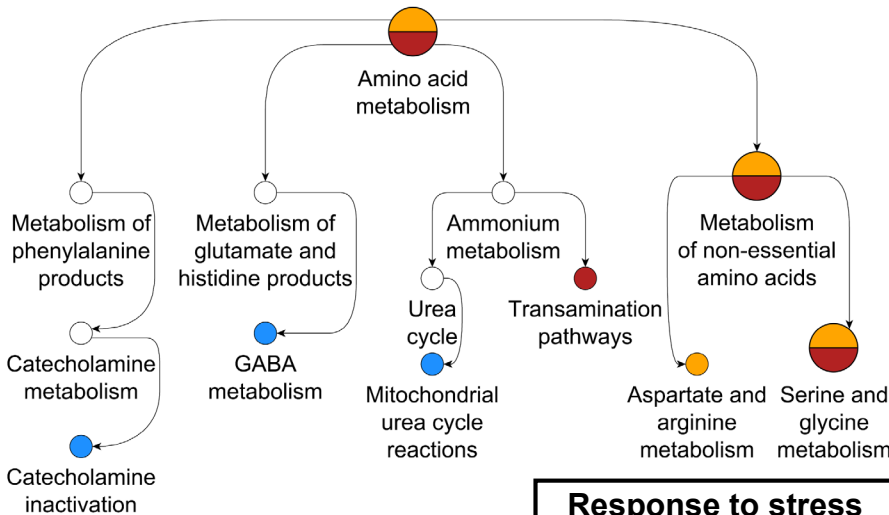

# Response to stress

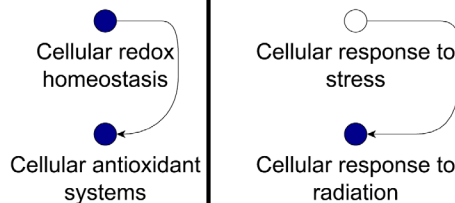

**Up by cardiotoxic TKIs** (red up arrow)

**Down by cardiotoxic TKIs** (blue down arrow)

**Up by non-cardiotoxic TKIs** (blue up arrow)

**Down by non-cardiotoxic TKIs** (yellow down arrow)

**MBCO Intermediate SCP** (white circle)

**Higher SCP activity favors cardiotoxic response ('bad SCPs'):** red or orange

**Lower SCP activity favors cardiotoxic response ('good SCPs'):** blue or light blue

# Signaling

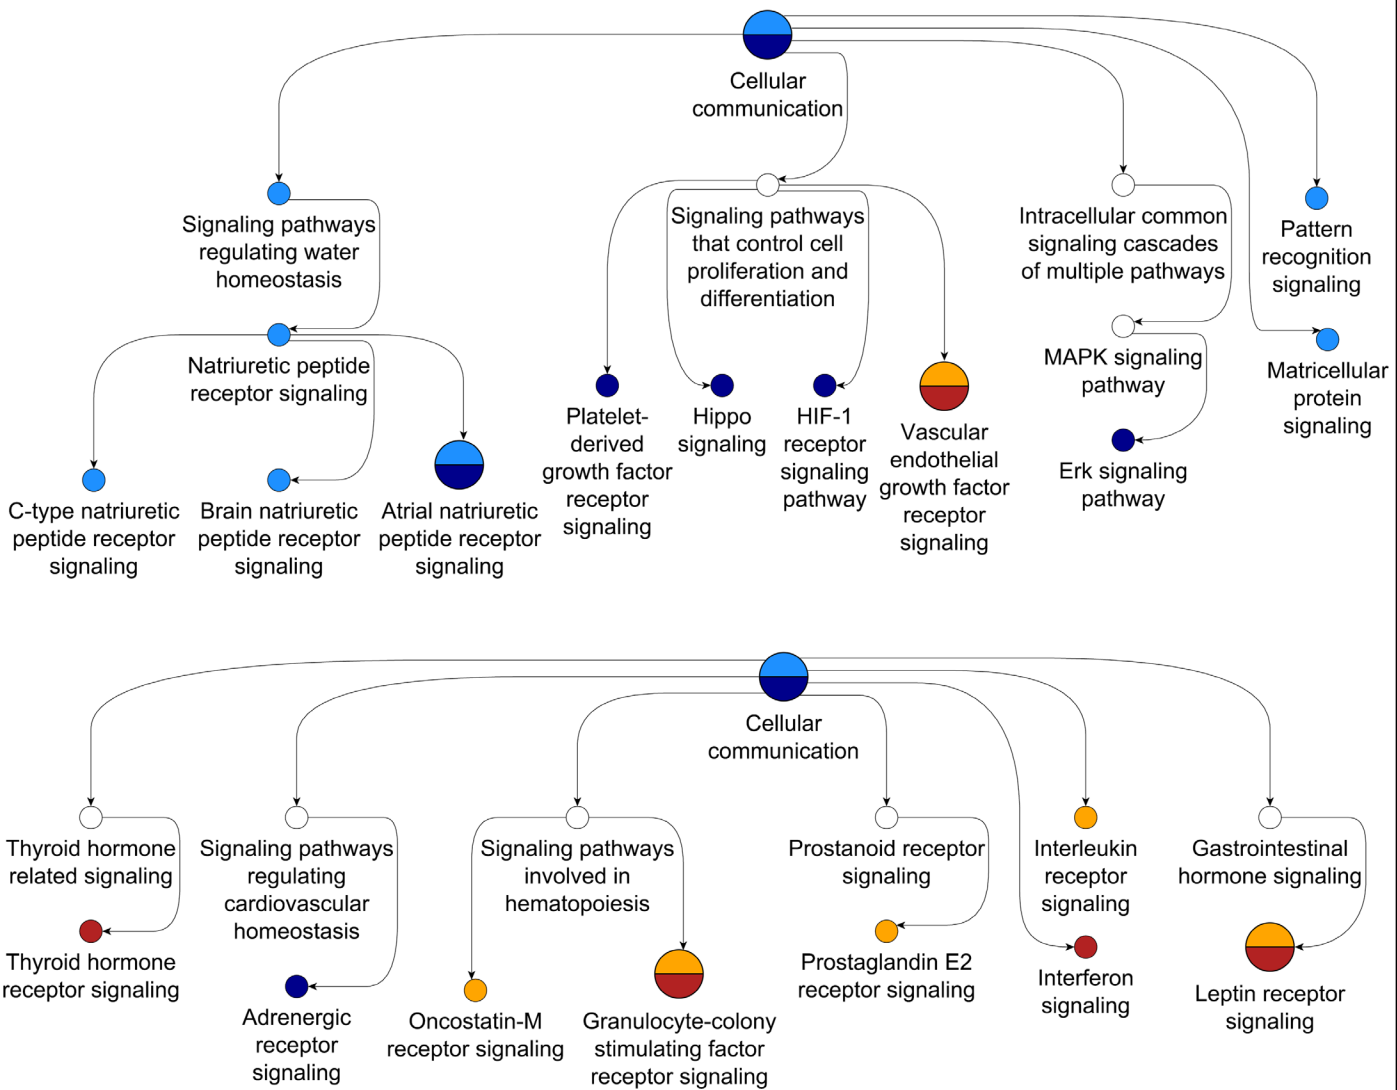

# Extracellular matrix and intracellular degradation

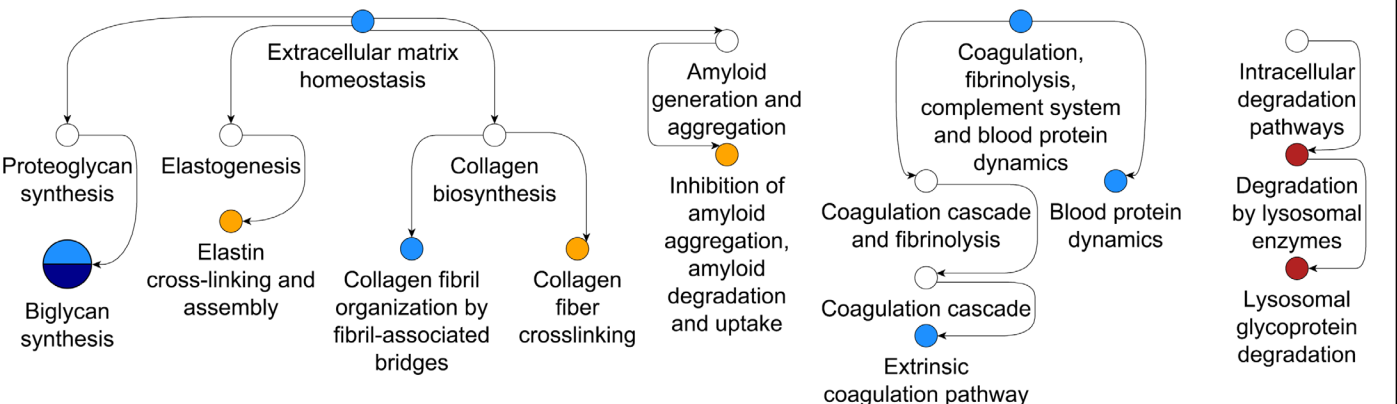

Up by cardiotoxic TKIs
Up by non-cardiotoxic TKIs
MBCO Intermediate
  
Down by cardiotoxic TKIs
Down by non-cardiotoxic TKIs

## Cell cycle, DNA dynamics

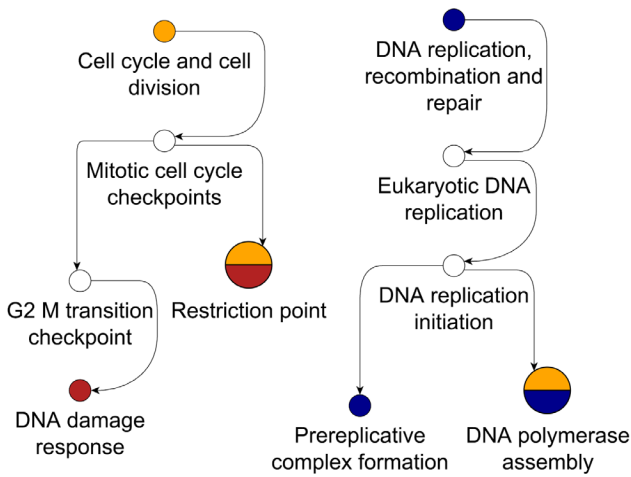

## Apoptosis

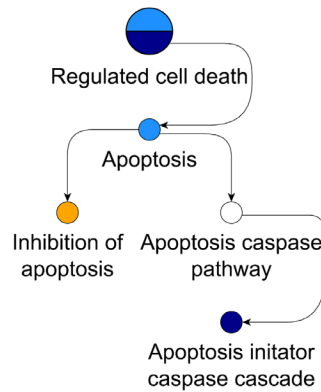

## Transmembrane transport

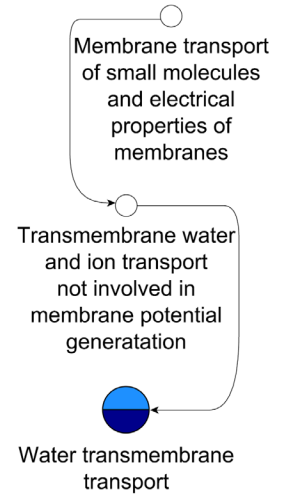

## Posttranslational modification

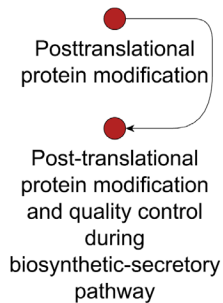

## Intermediate filaments

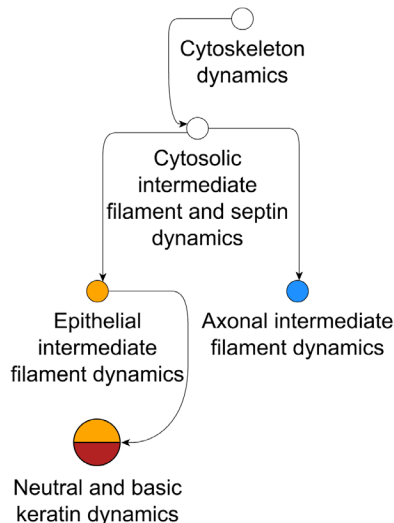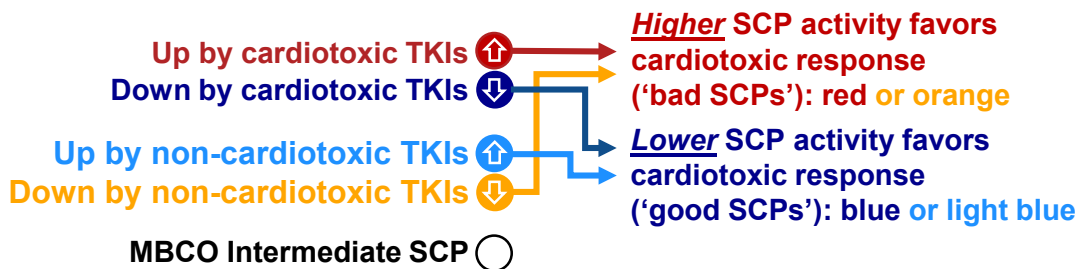

**Supplementary Fig. 19. Integration of identified SCPs into the MBCO hierarchy.** Up- and downregulated SCPs associated with a cardiotoxic or non-cardiotoxic response were integrated into the MBCO hierarchy. Arrows point from parent to child SCPs. Each tree starts with a level-1 SCP and then consecutively connects it to predicted level-2, -3 and -4 SCPs. Not predicted SCPs that are ancestors of predicted SCPs are in white. Red/orange: SCPs whose higher activity favors a cardiotoxic response, Dark blue/light blue: SCPs whose lower activity favors a cardiotoxic response. The muscle contractility SCPs, and selected SCPs involved in Energy metabolism are also shown in Fig. 2C.

Level-3  
SCPs

|                                                   | dabrafenib (n=5) | lapatinib (n=5) | pazopanib (n=5) | ponatinib (n=6)     | sorafenib (n=4) | sunitinib (n=6) | trametinib (n=4) | vandetanib (n=3) | bevacizumab (n=4) | trastuzumab (n=4) | # variants |
|---------------------------------------------------|------------------|-----------------|-----------------|---------------------|-----------------|-----------------|------------------|------------------|-------------------|-------------------|------------|
| Thin myofilament organization                     | 5                | 7;12<br>17      |                 | 1;1;1<br>1;1        |                 | 3;3;4<br>7;7;7  | 22               |                  | 3;3<br>5;7        |                   | 13         |
| Myofibril formation                               | 10<br>10         |                 | 9               | 3;4;8<br>12;12      | 8               |                 |                  |                  | 8                 |                   | 15         |
| Potassium TM transport                            |                  | 7<br>10         |                 |                     |                 |                 | 2;3<br>9         |                  | 17                | 7<br>10           | 44         |
| Gap junction organization                         | 24               |                 | 1;3             | 15;16<br>17         |                 |                 |                  | 9                | 13;14<br>14;15    |                   | 21         |
| Chloride TM transport                             |                  |                 |                 | 14;14<br>16         |                 | 12<br>12        |                  | 8                |                   |                   | 21         |
| Water TM transport                                | 6;7              |                 | 4               | 6;9                 |                 |                 |                  |                  |                   |                   | 7          |
| Citric acid cycle                                 |                  |                 | 1;1<br>2;3      |                     |                 |                 |                  |                  |                   |                   | 15         |
| Polyol pathway                                    |                  |                 |                 |                     |                 |                 |                  |                  | 1;1<br>1;1        |                   | 2          |
| Serine and glycine metabolism                     | 1;1;1<br>2;3     |                 | 1;1;3<br>4;5    | 5;5;5<br>5;6        | 2;11<br>19;21   | 12              | 4                | 12<br>14         |                   |                   | 15         |
| Transamination pathways                           |                  |                 | 6;10<br>10;11   |                     |                 |                 |                  |                  |                   |                   | 8          |
| Desaturation of fatty acids                       | 3                | 3;4             | 2;7<br>10       |                     | 7;8<br>14;14    |                 |                  |                  |                   |                   | 8          |
| Cholesterol-sensitive control of SREBP activation |                  | 2;3;4<br>5;6    | 4;5;8<br>8;8    | 15<br>15            | 14              | 7               |                  |                  |                   |                   | 6          |
| Cholesterol synthesis                             | 1;4<br>5         | 1;1;1<br>1;1    | 2;2<br>13       |                     | 2;4             | 1;1<br>3;8      |                  | 2                |                   |                   | 19         |
| Cellular cholesterol uptake and efflux            | 4                | 4<br>22         |                 |                     |                 | 3;3<br>7        |                  | 1<br>15          |                   |                   | 43         |
| Adrenergic receptor signaling                     | 9                | 9               |                 | 10;13<br>14         |                 |                 |                  |                  | 2;6<br>7;9        |                   | 44         |
| Hippo signaling                                   |                  |                 | 3;5<br>7        |                     |                 |                 |                  |                  |                   |                   | 46         |
| Thyroid hormone receptor signaling                |                  |                 |                 |                     |                 |                 |                  |                  | 4;4<br>6          |                   | 9          |
| PDGF receptor signaling                           |                  | 20              | 9               | 4;6;6<br>6;13       | 5;6<br>10;15    |                 | 15<br>30         | 9<br>13          |                   | 2;4<br>5;11       | 18         |
| VEGF receptor signaling                           | 7;7<br>10        |                 | 6;10<br>10;11   |                     |                 |                 |                  |                  |                   |                   | 15         |
| HIF-1 receptor signaling pathway                  | 8;8              |                 | 1;6<br>6        |                     |                 |                 |                  |                  |                   |                   | 12         |
| Leptin receptor signaling                         |                  | 3;5<br>5;6      |                 |                     |                 |                 |                  |                  |                   | 4                 | 8          |
| GCSF receptor signaling                           |                  | 7;8<br>11;12    |                 |                     |                 |                 |                  |                  | 15                | 11                | 5          |
| Biglycan synthesis                                | 12               | 18;19<br>21;28  | 15              | 9;10;10<br>11;12;14 | 8               |                 | 26<br>28         | 5;8<br>10        |                   | 15;17<br>19       | 0          |
| Lysosomal glycoprotein degradation                |                  |                 | 4;4;5<br>8;8    |                     |                 |                 |                  |                  |                   |                   | 9          |
| Restriction point                                 |                  |                 |                 |                     |                 | 2;3;4<br>6;11   |                  | 9                |                   |                   | 13         |

Up by cardiotoxic TKIs  
(‘bad SCPs’)

Down by cardiotoxic TKIs  
(‘good SCPs’)

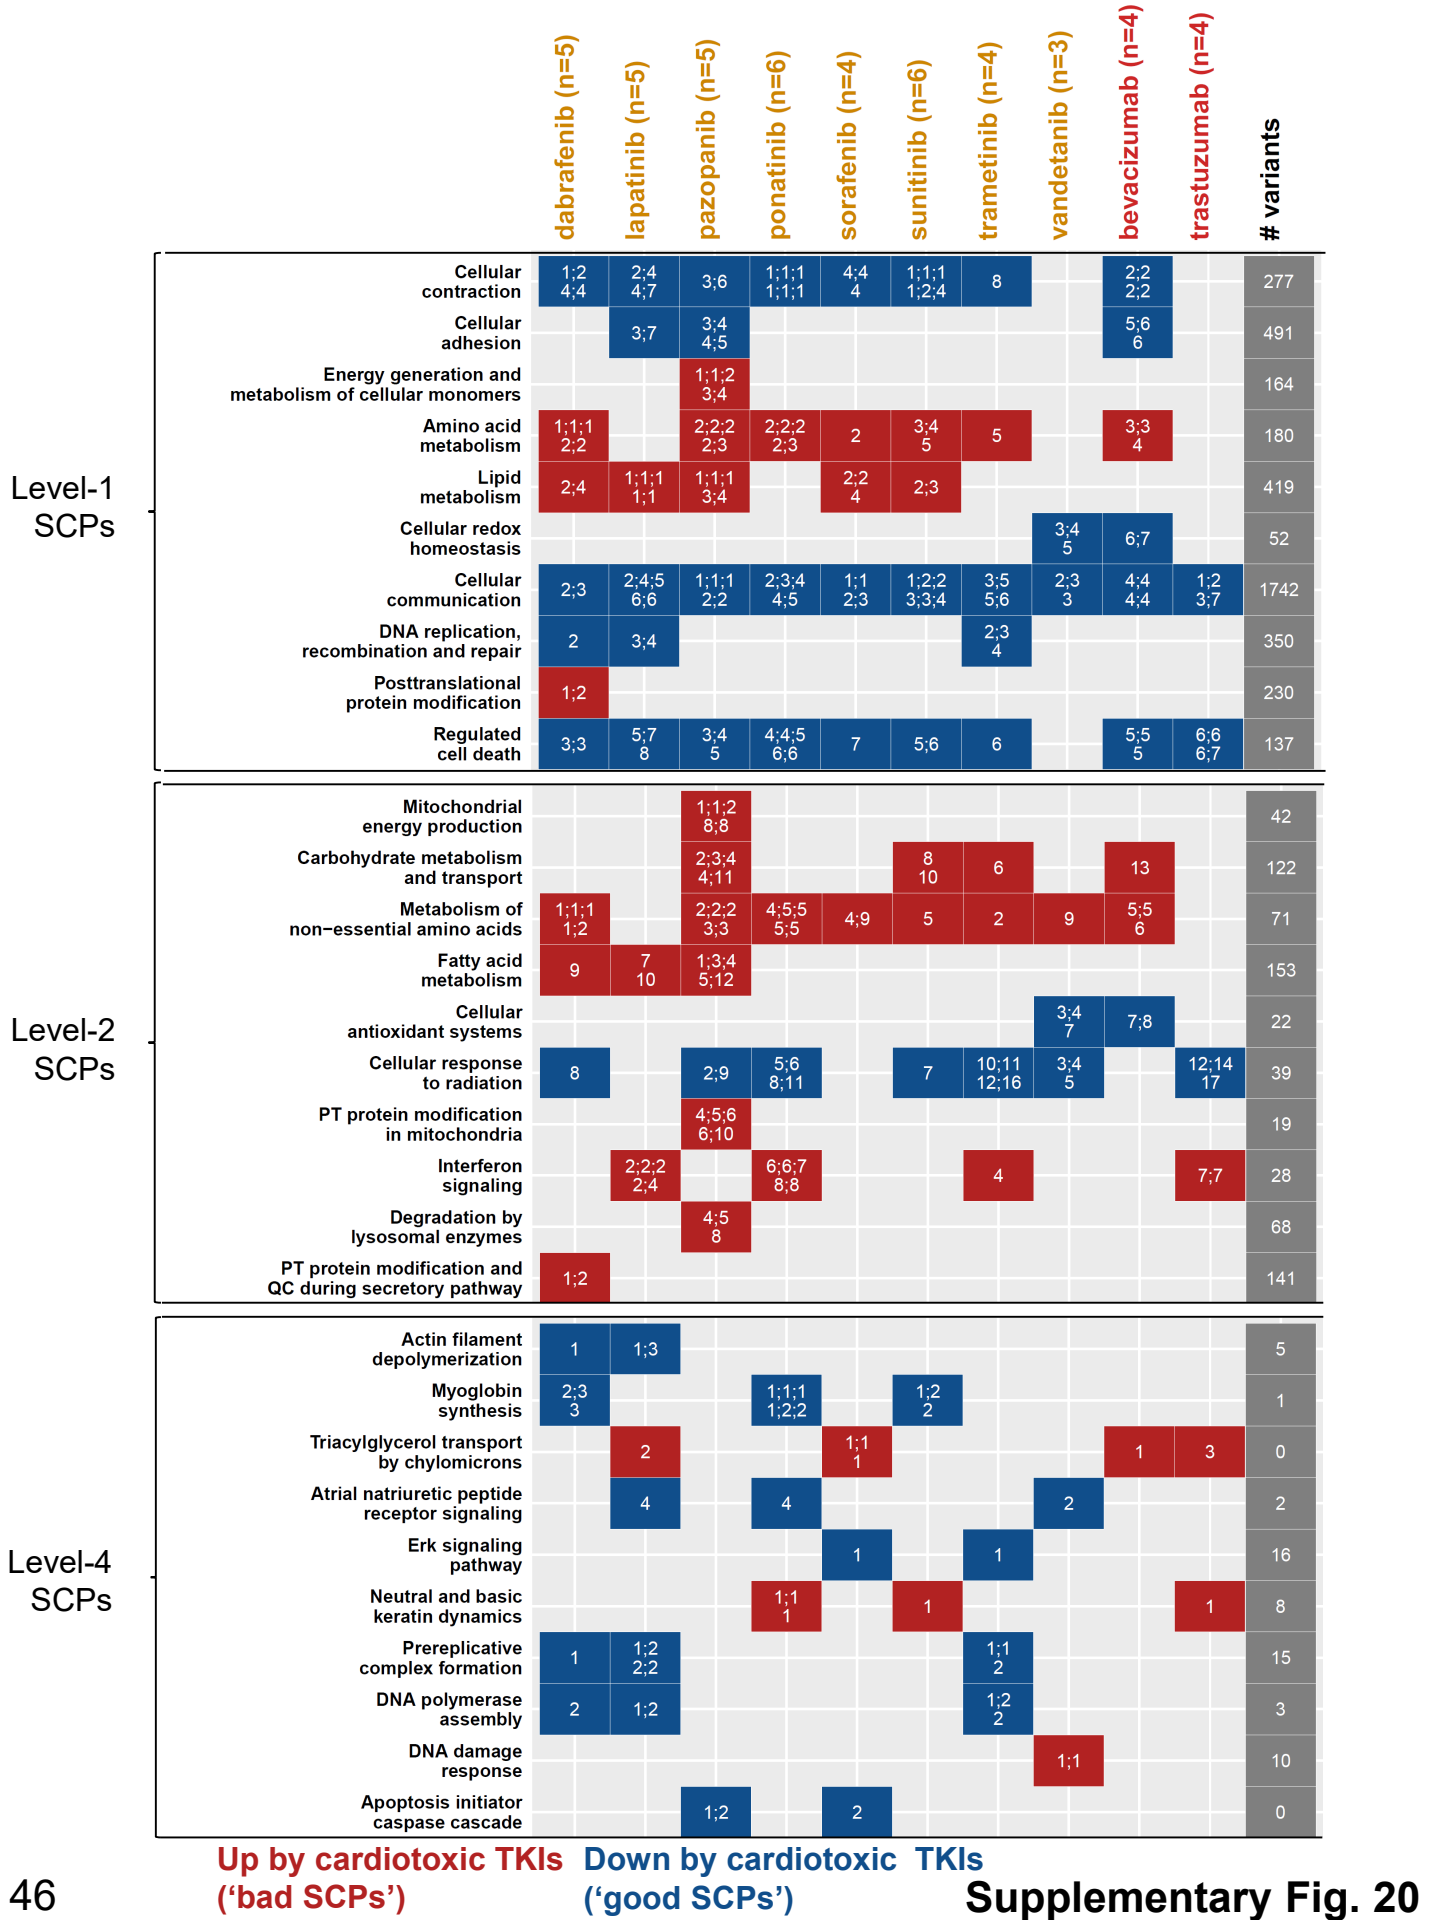

**Supplementary Fig. 20. Regulation of identified SCPs by each cardiotoxic TKI.** SCPs that were up- or downregulated at higher ranks by cardiotoxic TKIs were mapped back to the individual drugs that upregulated (red) or repressed (dark blue) them. Numbers indicate significance ranks as shown in Suppl. Figs. 14B/C/D/E for level-1, -2, -3 and -4 SCPs. Only ranks that were below the maximum rank cutoff in our F1 score and AUC statistics are shown (20, 20, 30, 20 for level-1, -2, -3 and -4 SCPs). Numbers in parentheses after drug labels indicate total numbers of treated cell lines for each TKI. Number of genomic variants that are underrepresented in the general population and map to SCP genes are shown in the last column. See methods for details. Note that this representation gives an estimation of the recall for each SCP, but does not allow conclusions about the precision that was favored during identification of SCPs associated with a cardiotoxic response. Drug labels of small molecule kinase inhibitors and monoclonal antibodies are colored orange and red, respectively.

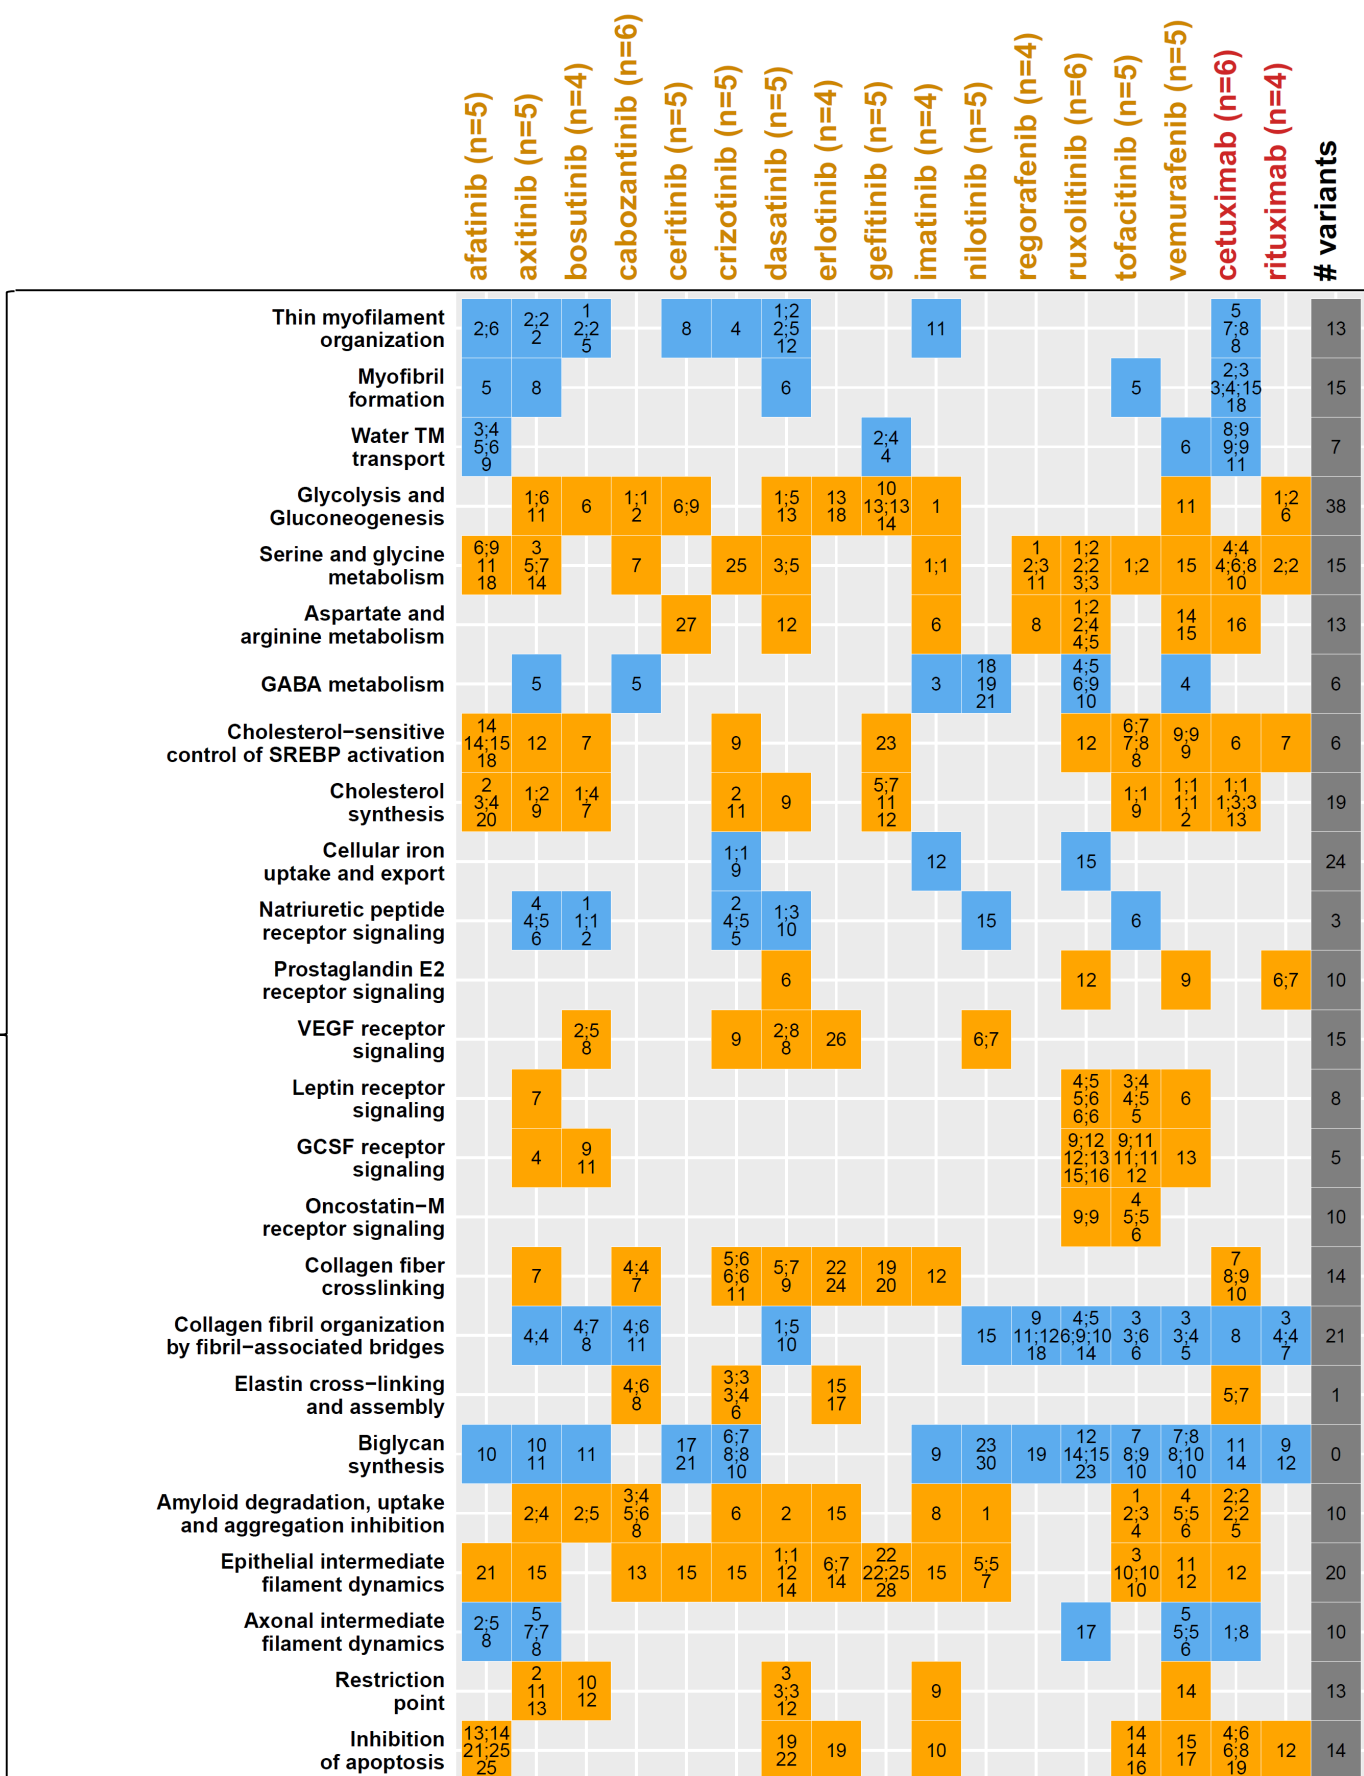

Up by non-cardiotoxic TKIs ('good SCPs')  
 Down by non-cardiotoxic TKIs ('bad SCPs')



Level-1 SCPs

|                                                       | afatinib (n=5)  | axitinib (n=5)  | bosutinib (n=4) | cabozantinib (n=6) | ceritinib (n=5) | crizotinib (n=5) | dasatinib (n=5) | erlotinib (n=4) | gefitinib (n=5) | imatinib (n=4) | nilotinib (n=5) | regorafenib (n=4) | ruxolitinib (n=6) | tofacitinib (n=5) | vemurafenib (n=5) | cetuximab (n=6)   | rituximab (n=4) | # variants |
|-------------------------------------------------------|-----------------|-----------------|-----------------|--------------------|-----------------|------------------|-----------------|-----------------|-----------------|----------------|-----------------|-------------------|-------------------|-------------------|-------------------|-------------------|-----------------|------------|
| Cellular contraction                                  | 1<br>1,2<br>3   | 1,2<br>3        | 1<br>1,2<br>3   |                    | 3,5             | 2,2<br>6         | 1,1<br>1,2<br>2 | 2,5<br>5        | 2,6<br>7        | 4              |                 | 4                 |                   | 3,7<br>7          | 3                 | 1,1<br>2,2<br>3   |                 | 277        |
| Energy generation and metabolism of cellular monomers |                 | 6,6<br>6        | 6               | 2<br>3,6<br>7      | 4,5             |                  | 5               |                 | 6,8             | 2              |                 |                   |                   |                   | 4,8               |                   | 3,4<br>5        | 164        |
| Amino acid metabolism                                 | 3<br>3,3<br>3   | 4<br>5,5<br>5   |                 | 2,5<br>6           |                 | 5,7              | 4<br>4,4<br>4   |                 |                 | 1,3<br>4       |                 | 2<br>3,3<br>4     | 1,1<br>2,2<br>2,2 | 2,8               | 2,5<br>5,6<br>7   | 2,2<br>3,3<br>3,3 | 4,5<br>5        | 180        |
| Lipid metabolism                                      | 2<br>2,2<br>4   | 1,2<br>7        | 3<br>3,4<br>5   | 7                  |                 | 2,3<br>6         |                 |                 | 3,3<br>4,4<br>6 |                |                 |                   |                   | 1<br>1,4<br>6     | 2,2<br>3,3<br>4   | 1,2<br>3,4<br>4   | 6,6             | 419        |
| Nucleotide metabolism                                 |                 |                 | 6               |                    | 5,6             |                  |                 | 5,7<br>7        |                 |                |                 |                   |                   |                   |                   |                   |                 | 59         |
| Cellular communication                                | 1,2<br>3,3<br>6 | 1,1<br>2,2<br>3 |                 | 1,1<br>1,2<br>3,3  | 1,1<br>1,2<br>3 | 2<br>3,5<br>6    | 2,3<br>3,4<br>6 |                 | 1,1<br>1,2<br>3 |                | 6               | 4,5               | 2,3<br>3,5<br>5   | 2,2<br>2,2<br>6   | 2,2<br>2,2<br>3   | 2,3<br>4,4<br>5,5 | 2,2<br>5        | 1742       |
| ECM homeostasis                                       | 1<br>2,4<br>4   | 1,2<br>2,4<br>5 | 1<br>2,2<br>2   | 1,4<br>3           | 1,1<br>2,2<br>4 | 1,1<br>1,1<br>1  | 1<br>1,2<br>2   | 1,3             | 1,2<br>2,2<br>5 | 2,3            | 4               | 2<br>2,3<br>3     | 1,1<br>1,1<br>2,2 | 1,1<br>1,1<br>1   | 1,1<br>1,1<br>3,4 | 1,1<br>2,3<br>3,4 | 1,1<br>1        | 524        |
| Coag., fib., compl. system and blood protein dynamics |                 |                 | 5,6             | 5                  | 4,5             | 3,4<br>4         | 2,3<br>3,3<br>5 | 3,5<br>8        | 1<br>3,3<br>5   | 6              |                 |                   | 2,3<br>3,3<br>4   | 2,3<br>3          | 4,4               | 4,6<br>6,6<br>6   |                 | 94         |
| Cell cycle and cell division                          | 1,1<br>1,1<br>2 | 4,6             |                 |                    | 1,1<br>1,1<br>1 |                  |                 | 1<br>1,1<br>1   | 1,1<br>1        |                |                 |                   |                   | 7                 |                   | 1,1<br>1,1<br>1   |                 | 532        |
| Regulated cell death                                  | 4,4<br>5        | 1,3<br>3,4<br>5 |                 |                    | 3,6             |                  | 3,4<br>5        | 2<br>3,4<br>4   | 4<br>4,5<br>6   |                | 4,5             |                   |                   | 4<br>6,6<br>7     |                   | 2,4<br>4,5<br>5   |                 | 137        |

Level-2 SCPs

|                                                                  |                  |                   |               |                 |                 |                 |                 |               |                  |     |                |               |                    |                 |                 |                    |               |     |
|------------------------------------------------------------------|------------------|-------------------|---------------|-----------------|-----------------|-----------------|-----------------|---------------|------------------|-----|----------------|---------------|--------------------|-----------------|-----------------|--------------------|---------------|-----|
| Myofibril formation and organization                             | 1,2<br>3,3<br>13 | 2,2<br>2          | 1<br>1,4<br>6 |                 | 3               | 1,2<br>8        | 1,1<br>1,2<br>5 | 4,5<br>7      | 1,7<br>10        | 10  |                | 10            |                    | 7<br>13         |                 | 1,1<br>1,1<br>2    |               | 273 |
| Carbohydrate metabolism and transport                            | 11               | 8<br>11<br>12     | 8             | 1<br>1,5<br>10  | 6,8<br>15       |                 | 2<br>11         | 19            | 6<br>11,13<br>14 | 2   |                |               |                    |                 | 2<br>11         |                    | 2,2<br>9      | 122 |
| Metabolism of non-essential amino acids                          | 6<br>6,6<br>7    | 7,8<br>9,10<br>11 | 13            | 6               | 17              | 7<br>14         | 1,7<br>13<br>15 |               |                  | 1,1 |                | 1<br>2,4<br>4 | 1,1<br>1,1<br>1,2  | 2,4             | 9,9<br>11       | 4,5<br>6,6,9<br>11 | 5,7           | 71  |
| Metabolism and transport of cholesterol, steroids and bile acids | 2,3<br>4,6<br>10 | 1,3<br>15         | 4<br>10<br>13 |                 |                 | 1,4<br>6        | 10              |               | 6<br>10,13<br>14 |     |                |               | 1,1<br>3,4<br>12   | 1,1<br>1,2<br>4 | 1,2<br>3,3<br>4 | 6,8                |               | 143 |
| Signaling pathways regulating water homeostasis                  |                  | 9<br>12,12<br>14  | 2<br>3,4<br>6 | 2               | 13              | 7,9<br>10<br>10 | 2,2<br>10       |               |                  |     | 11             |               |                    | 11              |                 |                    |               | 30  |
| Pattern recognition signaling                                    |                  |                   |               |                 | 7,7<br>10<br>15 | 5<br>13         |                 |               |                  |     |                |               | 7,9<br>10          |                 | 4               |                    |               | 125 |
| Interleukin receptor signaling                                   |                  |                   |               |                 |                 |                 |                 |               |                  |     |                |               | 4,6<br>6,6<br>7,9  | 4<br>5,5<br>6   |                 |                    |               | 21  |
| Matricellular protein signaling                                  | 1<br>4,5<br>7    | 2,4<br>8          | 2<br>2,5<br>7 | 1,2<br>2,4<br>6 | 1,2<br>8        | 1,2<br>2        | 1,2<br>3,4<br>5 |               | 4<br>5,5<br>5    | 6   | 7<br>7,7<br>10 | 6<br>7,7<br>9 | 2,4<br>5,6,7<br>12 | 1,2<br>2,3<br>5 | 1,1<br>2,3<br>4 | 2,3<br>4,6<br>10   | 3<br>3,3<br>4 | 34  |
| Blood protein dynamics                                           |                  | 7                 |               |                 |                 |                 |                 |               |                  |     |                |               | 5,6<br>6,10<br>10  | 3,3<br>3,3<br>6 | 5               |                    |               | 10  |
| Apoptosis                                                        | 3,5<br>6         | 1,1<br>4,6<br>9   |               |                 | 4<br>12         |                 | 3,6<br>7        | 2<br>3,3<br>4 | 4<br>5,7<br>7    | 13  | 11<br>12       |               | 18                 | 4,7<br>10<br>10 |                 | 1,2<br>2,6,6<br>13 |               | 123 |

Level-4 SCPs

|                                               |                 |     |          |     |   |                 |     |          |                 |          |   |     |               |                 |     |     |          |   |
|-----------------------------------------------|-----------------|-----|----------|-----|---|-----------------|-----|----------|-----------------|----------|---|-----|---------------|-----------------|-----|-----|----------|---|
| Myoglobin synthesis                           | 2,3<br>3,4<br>4 |     | 2        |     |   |                 | 1,2 |          | 1,1<br>1,1<br>1 |          |   | 1,1 | 3             | 1,1<br>2,2<br>2 | 2,2 | 1,2 |          | 1 |
| Triacylglycerol transport by chylomicrons     | 1               | 2,3 | 1,1<br>1 | 3,3 |   | 1               | 2,3 |          |                 |          |   | 2   |               |                 | 1,1 |     |          | 0 |
| Mitochondrial urea cycle reactions            |                 |     |          |     |   |                 | 2   | 1,2<br>2 |                 |          |   |     |               |                 |     |     |          | 7 |
| Catecholamine inactivation                    |                 |     |          |     | 1 |                 |     |          |                 |          |   |     |               |                 |     |     | 1,1<br>2 | 2 |
| Atrial natriuretic peptide receptor signaling |                 | 3   | 2,2<br>2 |     |   | 3<br>3,4<br>4   | 4   |          |                 |          | 1 |     | 1,2           |                 |     |     |          | 2 |
| Brain natriuretic peptide receptor signaling  |                 | 3   | 2,2<br>2 |     |   | 3<br>3,4<br>4   | 2,4 |          |                 |          |   |     |               |                 |     |     |          | 3 |
| C-type natriuretic peptide receptor signaling |                 |     | 2,2<br>2 |     |   |                 | 4   |          |                 |          |   |     |               |                 |     |     |          | 0 |
| Extrinsic coagulation pathway                 |                 |     |          |     |   | 1,1<br>1,2<br>2 |     |          |                 |          |   |     | 1<br>1,1<br>6 | 2<br>3,3<br>3   |     |     |          | 3 |
| Neutral and basic keratin dynamics            |                 |     |          |     | 1 | 3               |     | 1,1      | 3,4             |          |   |     |               |                 |     | 1   |          | 8 |
| DNA polymerase assembly                       |                 |     |          |     |   | 2<br>2,2<br>4   |     |          | 2<br>2,2<br>2   | 2,3<br>3 |   |     |               |                 |     |     |          | 3 |

Up by non-cardiotoxic TKIs ('good SCPs')  
Down by non-cardiotoxic TKIs ('bad SCPs')

**Supplementary Fig. 21. Regulation of identified SCPs by each non-cardiotoxic TKI.** SCPs that were up- or downregulated at higher ranks by non-cardiotoxic TKIs were mapped back to the individual drugs that down- (orange) or upregulated (light blue) them. Numbers indicate significance ranks as shown in Suppl. Figs. 14B/C/D/E for level-1, -2, -3 and -4 SCPs. Only ranks that were below the maximum rank cutoff in our F1 score and AUC statistics are shown (20, 20, 30, 20 for level-1, -2, -3 and -4 SCPs). Numbers after drug indicates total numbers of treated cell lines for each TKI. Number of genomic variants that are underrepresented in the general population and map to SCP genes are shown in the last column. See methods for details. Note that this representation gives an estimation of the recall for each SCP, but does not allow conclusions about the precision that was favored during identification of SCPs associated with a non-cardiotoxic response. Drug labels of small molecule kinase inhibitors and monoclonal antibodies are colored orange and red, respectively.

**A**

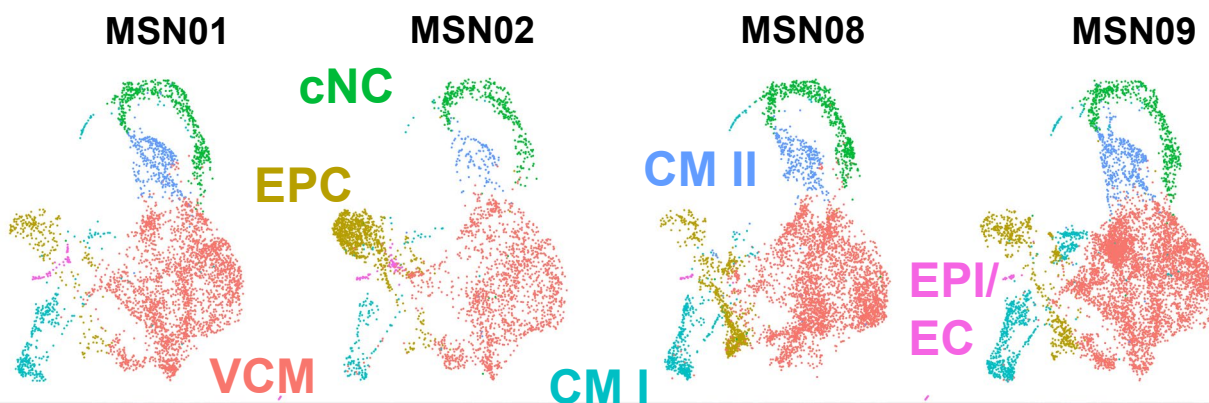

**B**

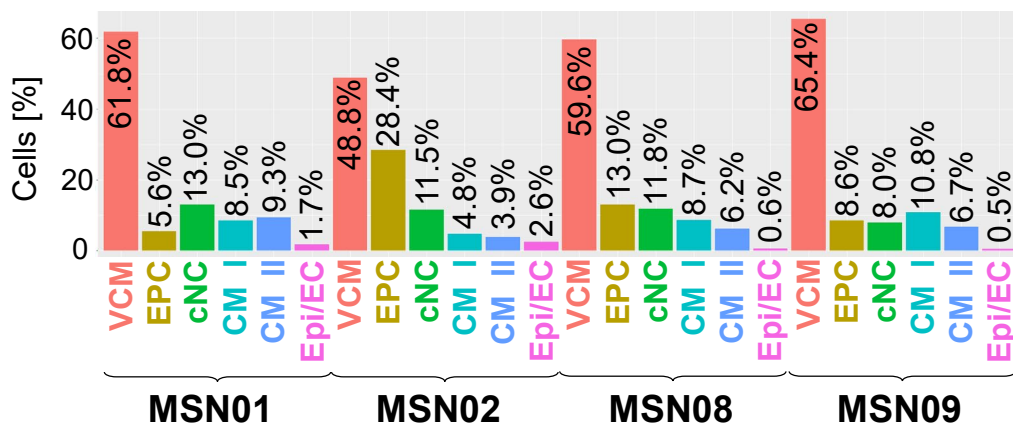

C

**Enrichment analysis for marker genes of cell types in the adult heart**

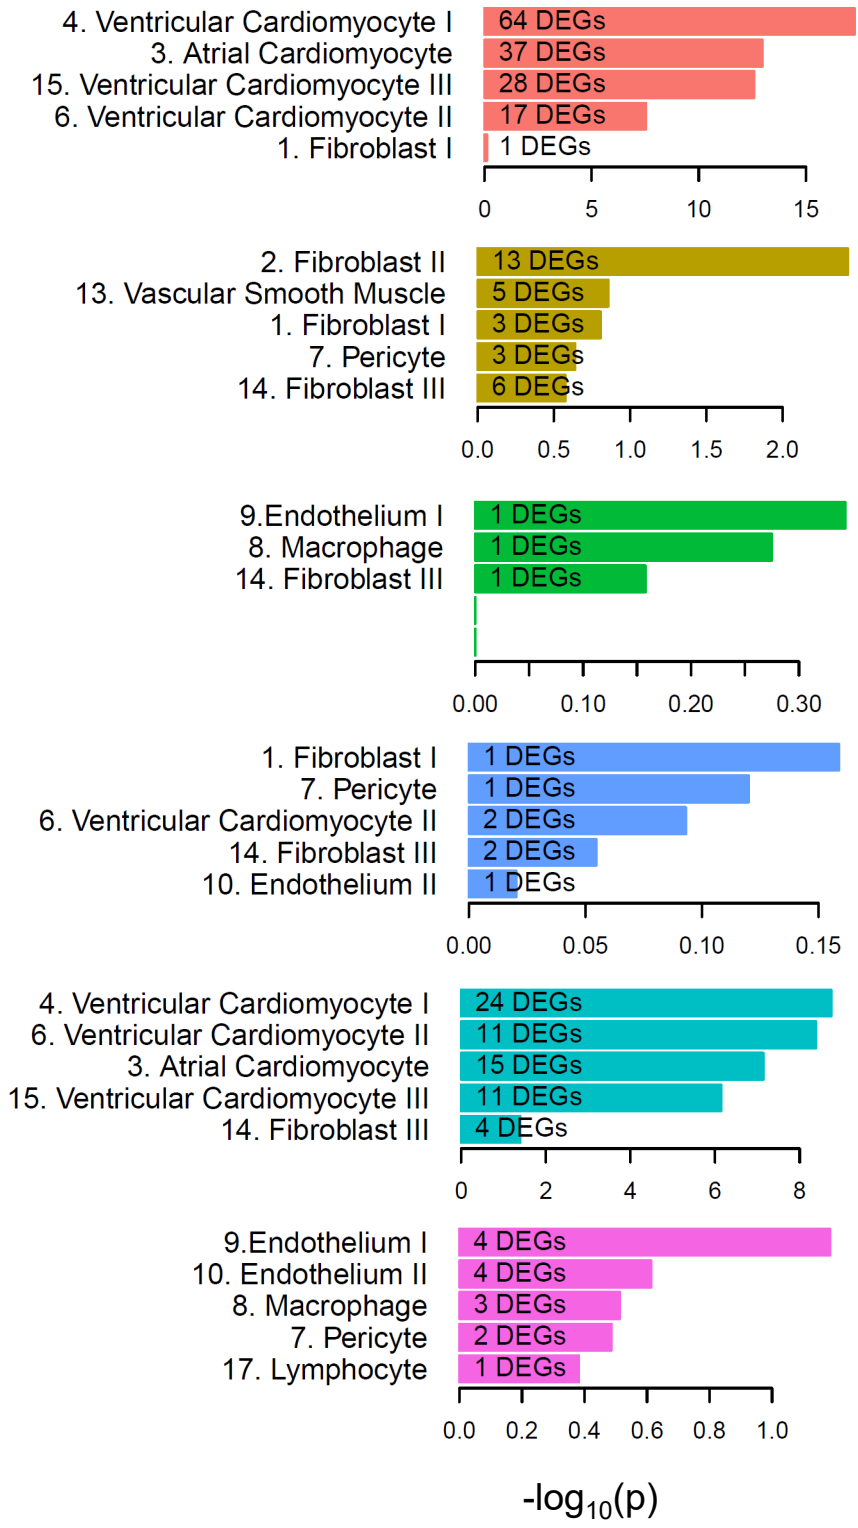

D

**Enrichment analysis for marker genes of cell types in the developing heart**

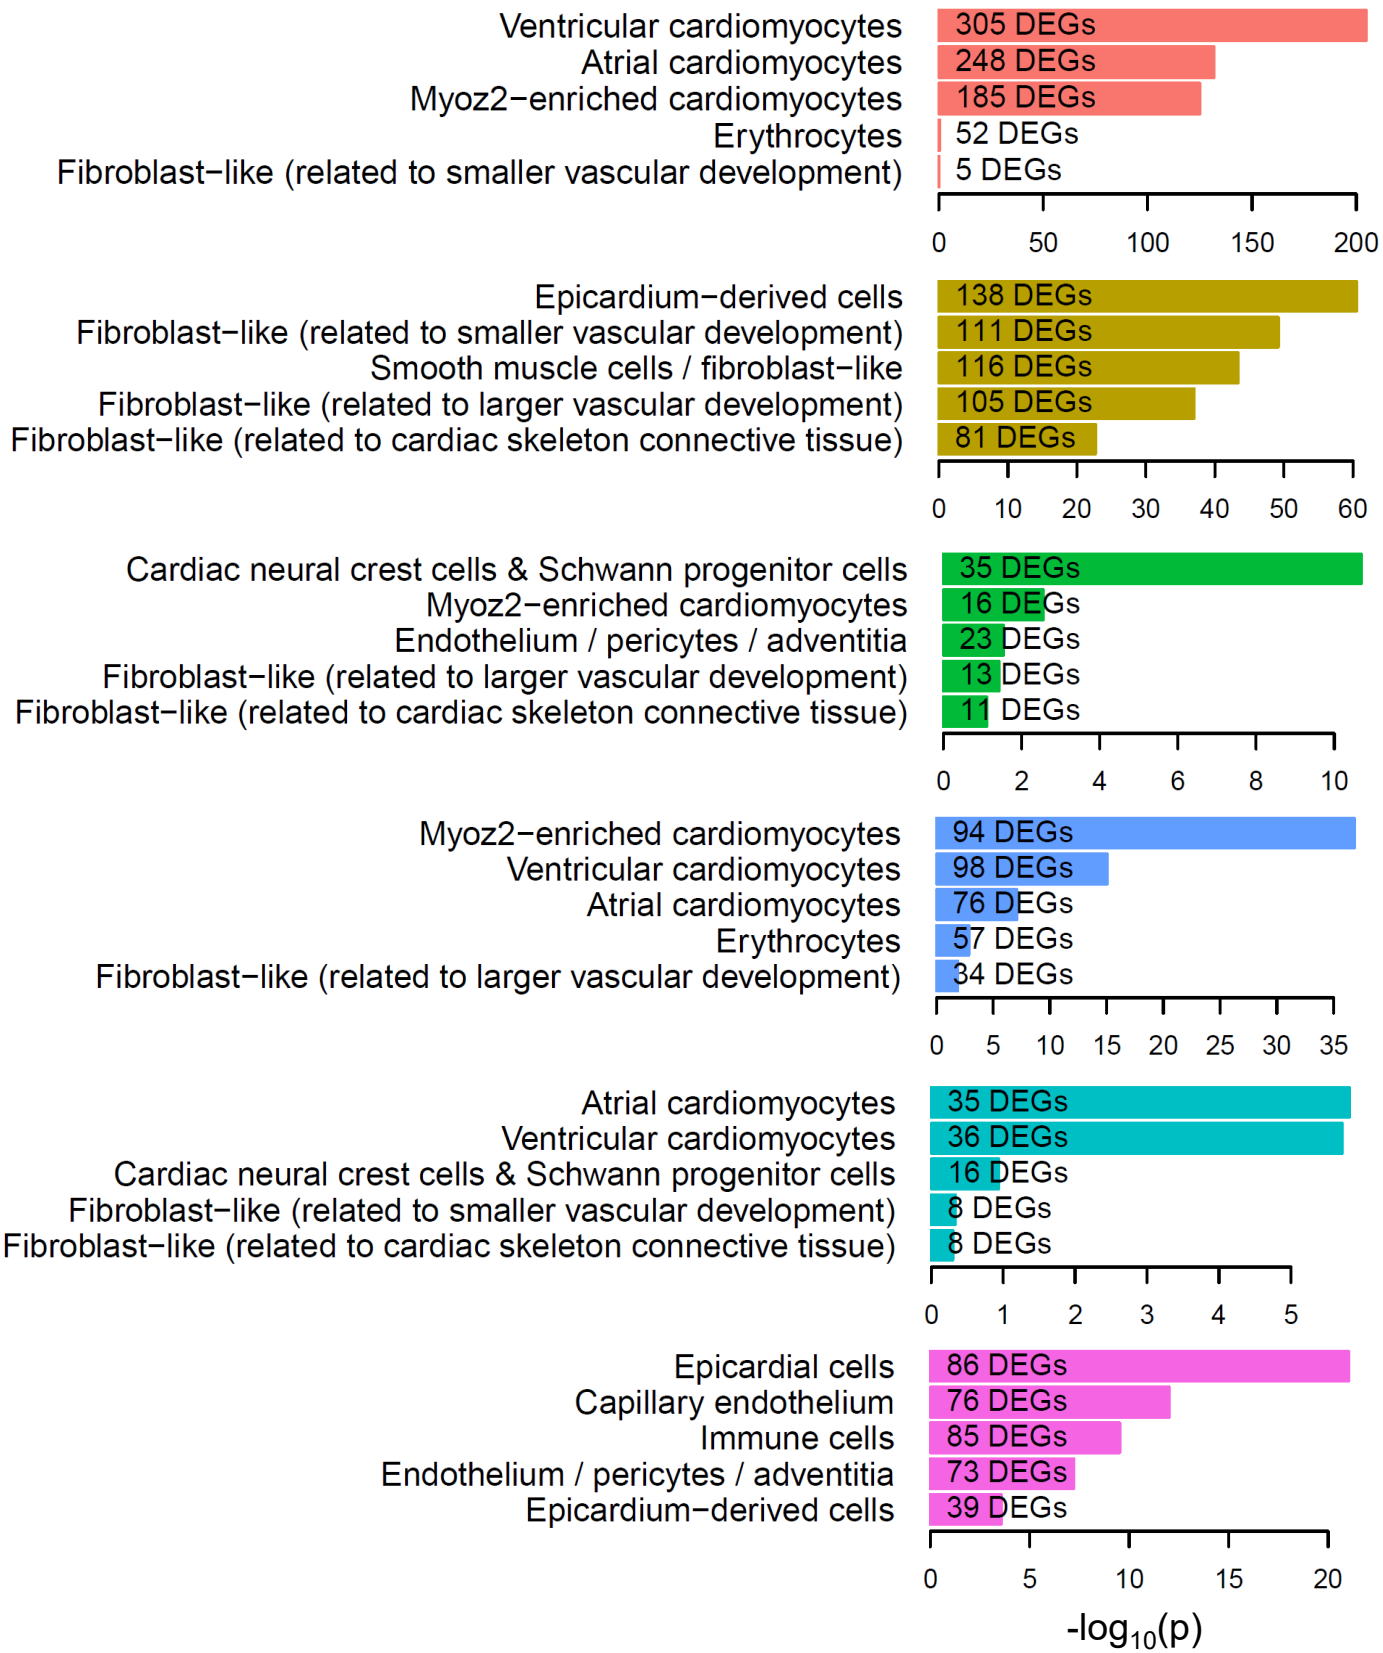

Supplementary Fig. 22

**Supplementary Fig. 22. Single cell RNAseq identifies five different cellular subtypes.** **(A)** Single cell RNAseq analysis of four of our six different hiPSC-derived cardiomyocyte cell lines identifies one ventricular cardiomyocyte (VCM) subtype, two additional cardiomyocyte subtypes (CM I and CM II), one epicardial-cell-derived subtype (EPC), one cardiac neural crest (cNC) subtype and one epicardial (EPI) or endothelial (EC) cell subtype. **(B)** Cell counts of the identified subtypes document that most of our cells are ventricular cardiomyocytes in all four cell lines. A and B are updated versions of two supplemental figures in our previous publication <sup>16</sup>. **(C)** Subtype-specific marker genes were subjected to pathway enrichment analysis using cell type marker genes identified from single nucleus RNAseq of the human adult heart or **(D)** cell type marker genes identified from single nucleus RNAseq of the human fetal heart. Enrichment results were used for cell type annotations shown in (A).

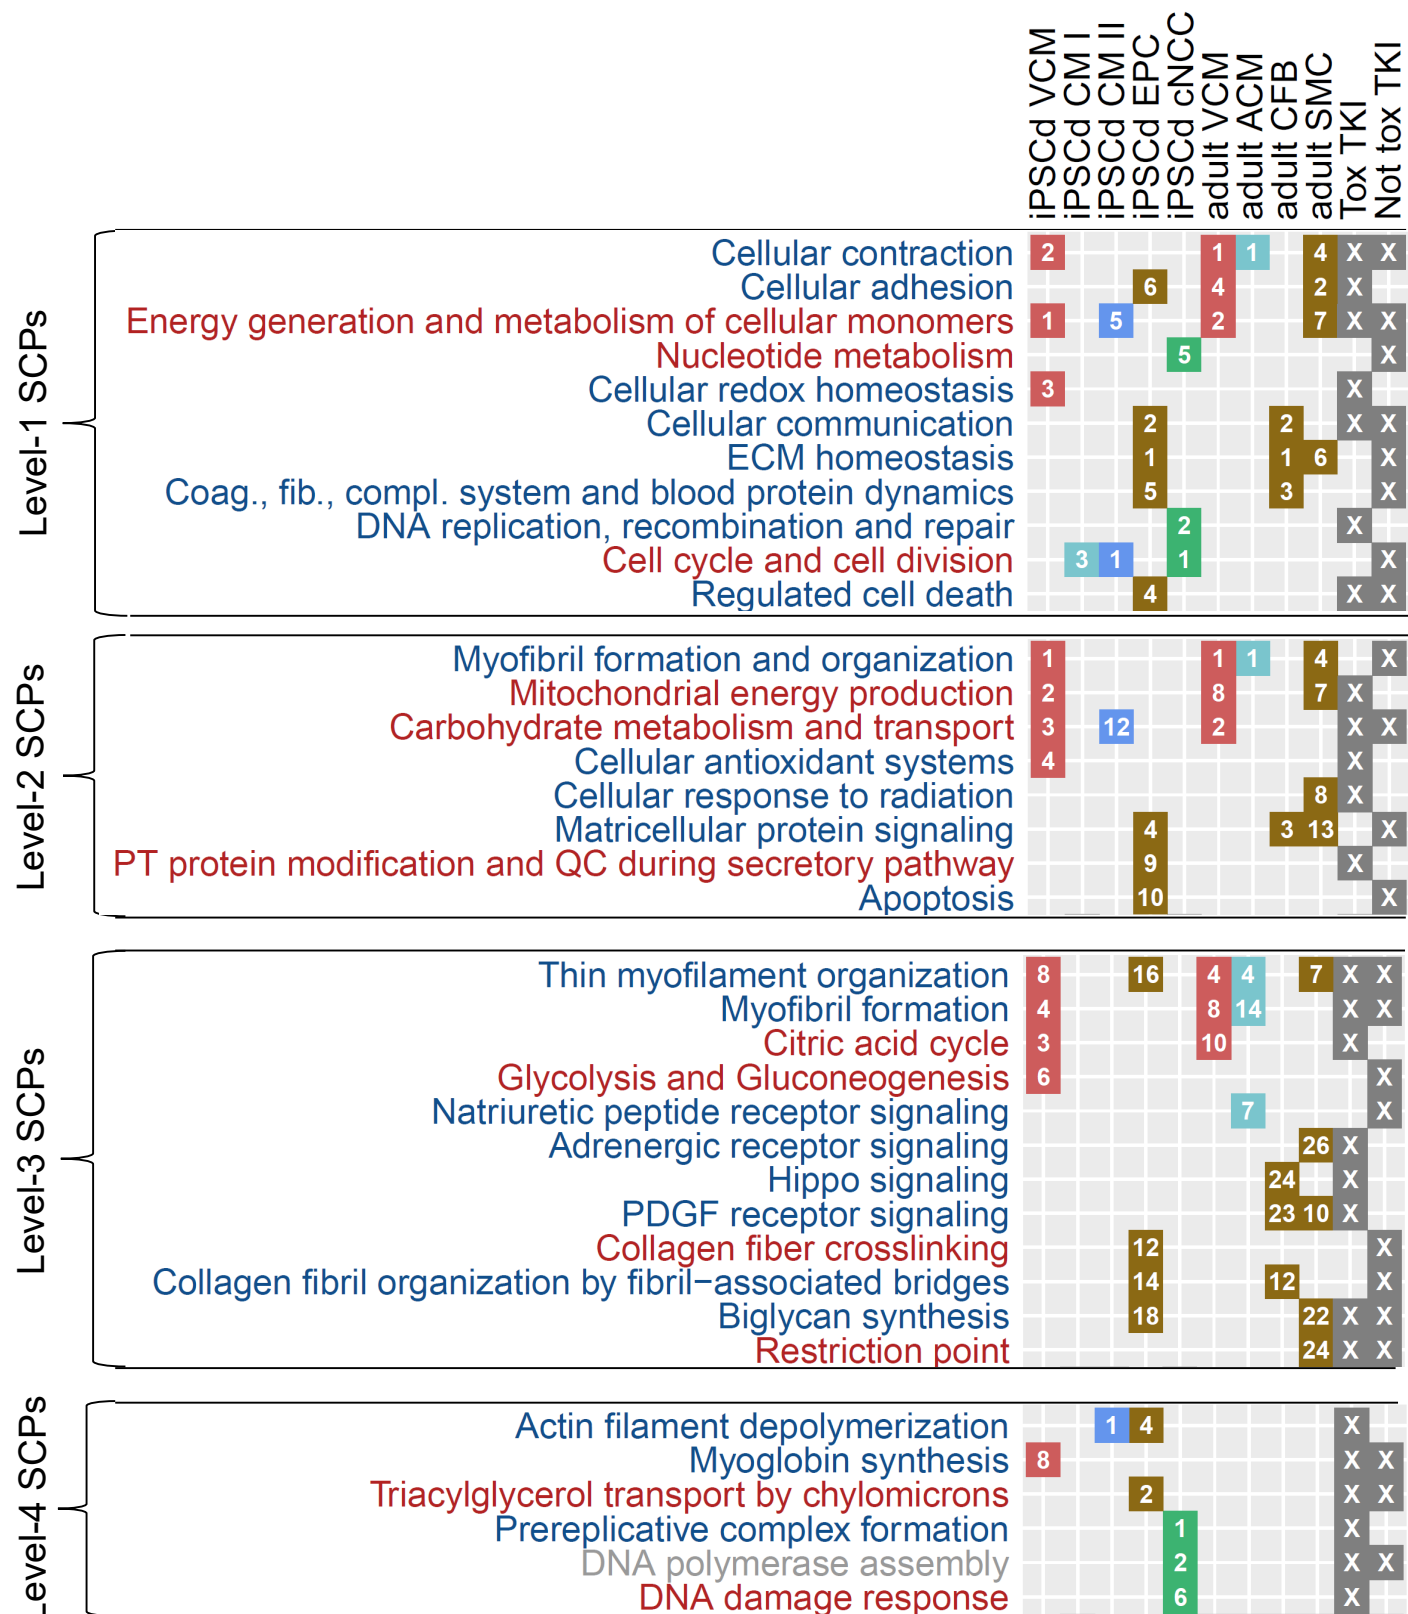

**Supplementary Fig. 23. SCPs can be mapped to cellular cardiac cell types.** Subtype marker genes identified by single cell RNAseq analysis of our four cell lines <sup>16</sup> were subjected to enrichment analysis using MBCO and Fisher's exact test. Significant SCPs (nominal p-value  $\leq 0.05$ ) were ranked by significance (numbers in the diagram). Similarly, we subjected cell type marker genes obtained from single nucleus RNAseq of the adult human heart <sup>29</sup> to pathway enrichment analysis. The last two columns indicate if the SCP was identified based on cardiotoxic and/or non-cardiotoxic TKIs. SCPs whose higher and lower activity is associated with a cardiotoxic response are in red and blue, respectively. Results for level-3 SCPs identified based on cardiotoxic TKIs are also shown in main figure 3A.

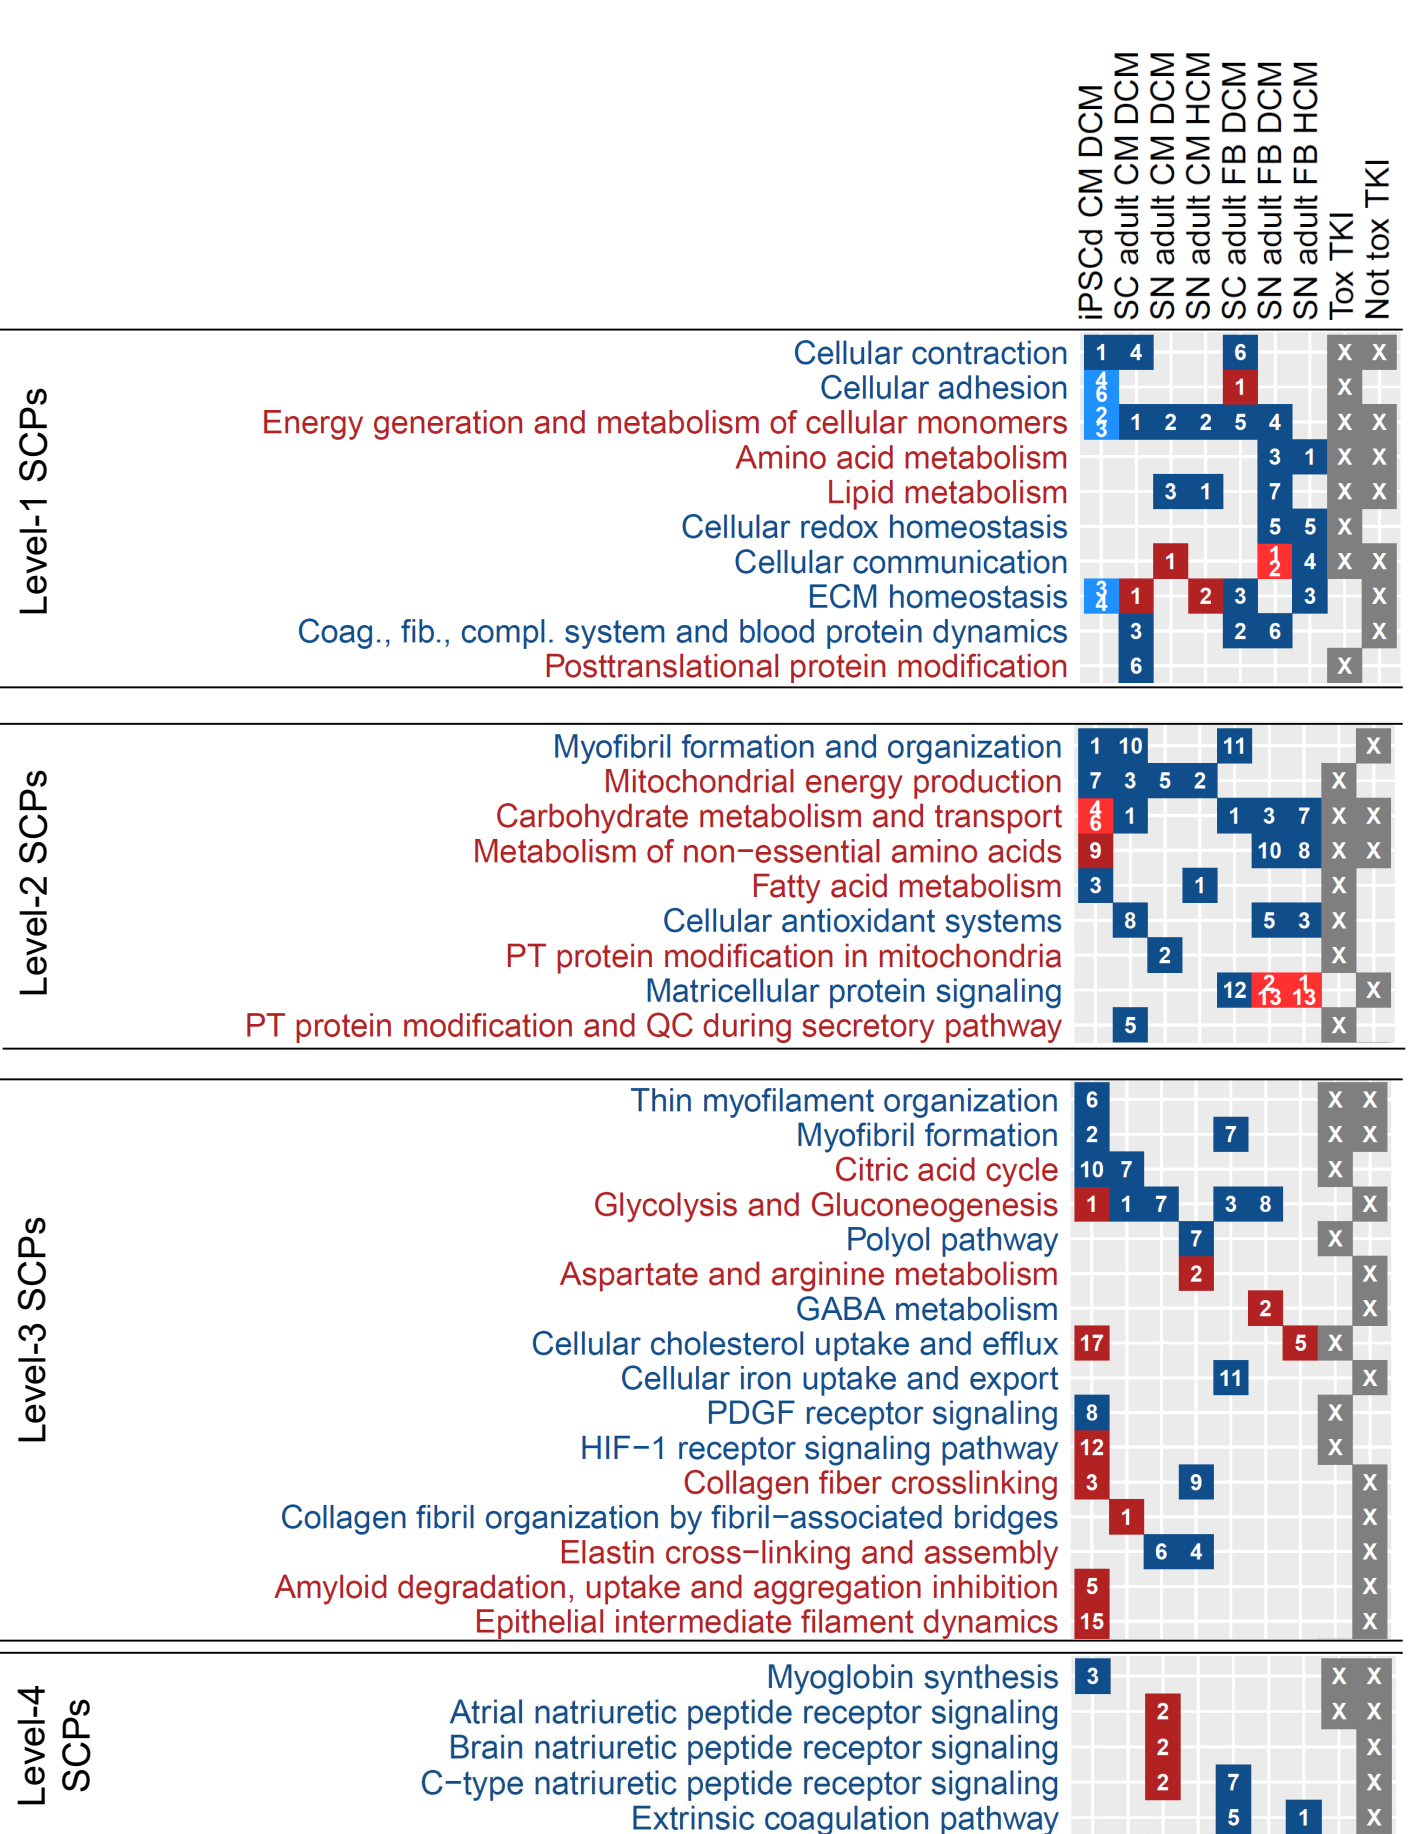



**Supplementary Fig. 24. SCPs indicative of TKI-induced cardiotoxicity partially overlap with prior knowledge obtained from single cell and single nucleus RNAseq studies.** DEGs in heart cells from patients with DCM or HCM obtained by single cell (SC) <sup>13</sup> and nucleus (SN) <sup>14</sup> RNAseq, respectively, as well as in hiPSC-derived cardiomyocytes from infant DCM patients (GSE184899) were subjected to pathway enrichment analysis using MBO and Fisher's exact test. Significantly up- or downregulated SCPs of each cell type (nominal p-value  $\leq 0.05$ ) were ranked by significance (numbers in the diagram). Only SCPs that overlap with SCPs for which higher (red) or lower (blue) activity favors a cardiotoxic response are shown. The last two columns indicate whether the SCP was identified based on cardiotoxic and/or non-cardiotoxic TKIs. iPSCd: iPSC-derived, CM: cardiomyocyte, FB: Cardiac fibroblast. Results for level-3 SCPs that were predicted based on cardiotoxic TKIs are also shown in main Figure 3B.

Up/Downregulated at higher ranks by  
anthracyclines      TKIs with high cardiotoxicity

Level-3 SCPs

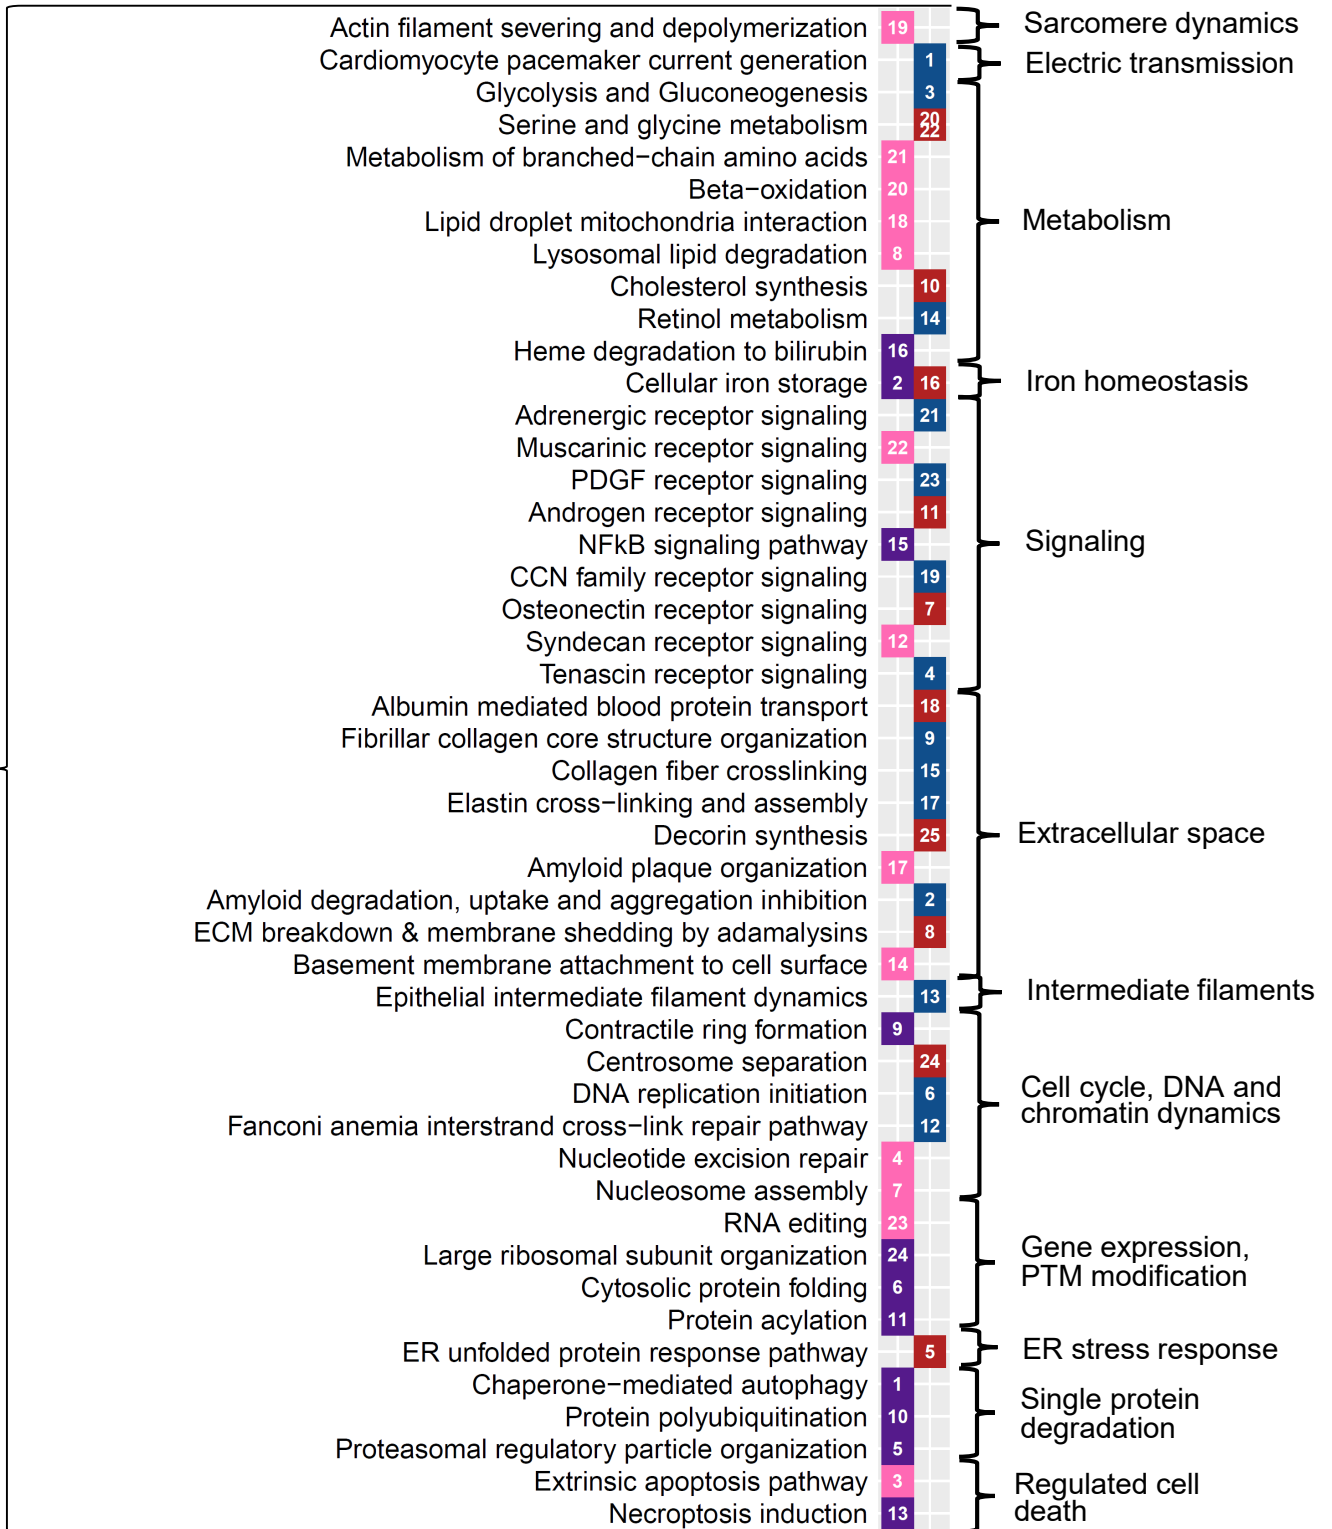

Up by anthracyclines ↑

Down by anthracyclines ↓

Up by very cardiotoxic TKIs ↑

Down by very cardiotoxic TKIs ↓

Up/Downregulated at higher ranks by  
**anthracyclines**      **TKIs with high cardiotoxicity**

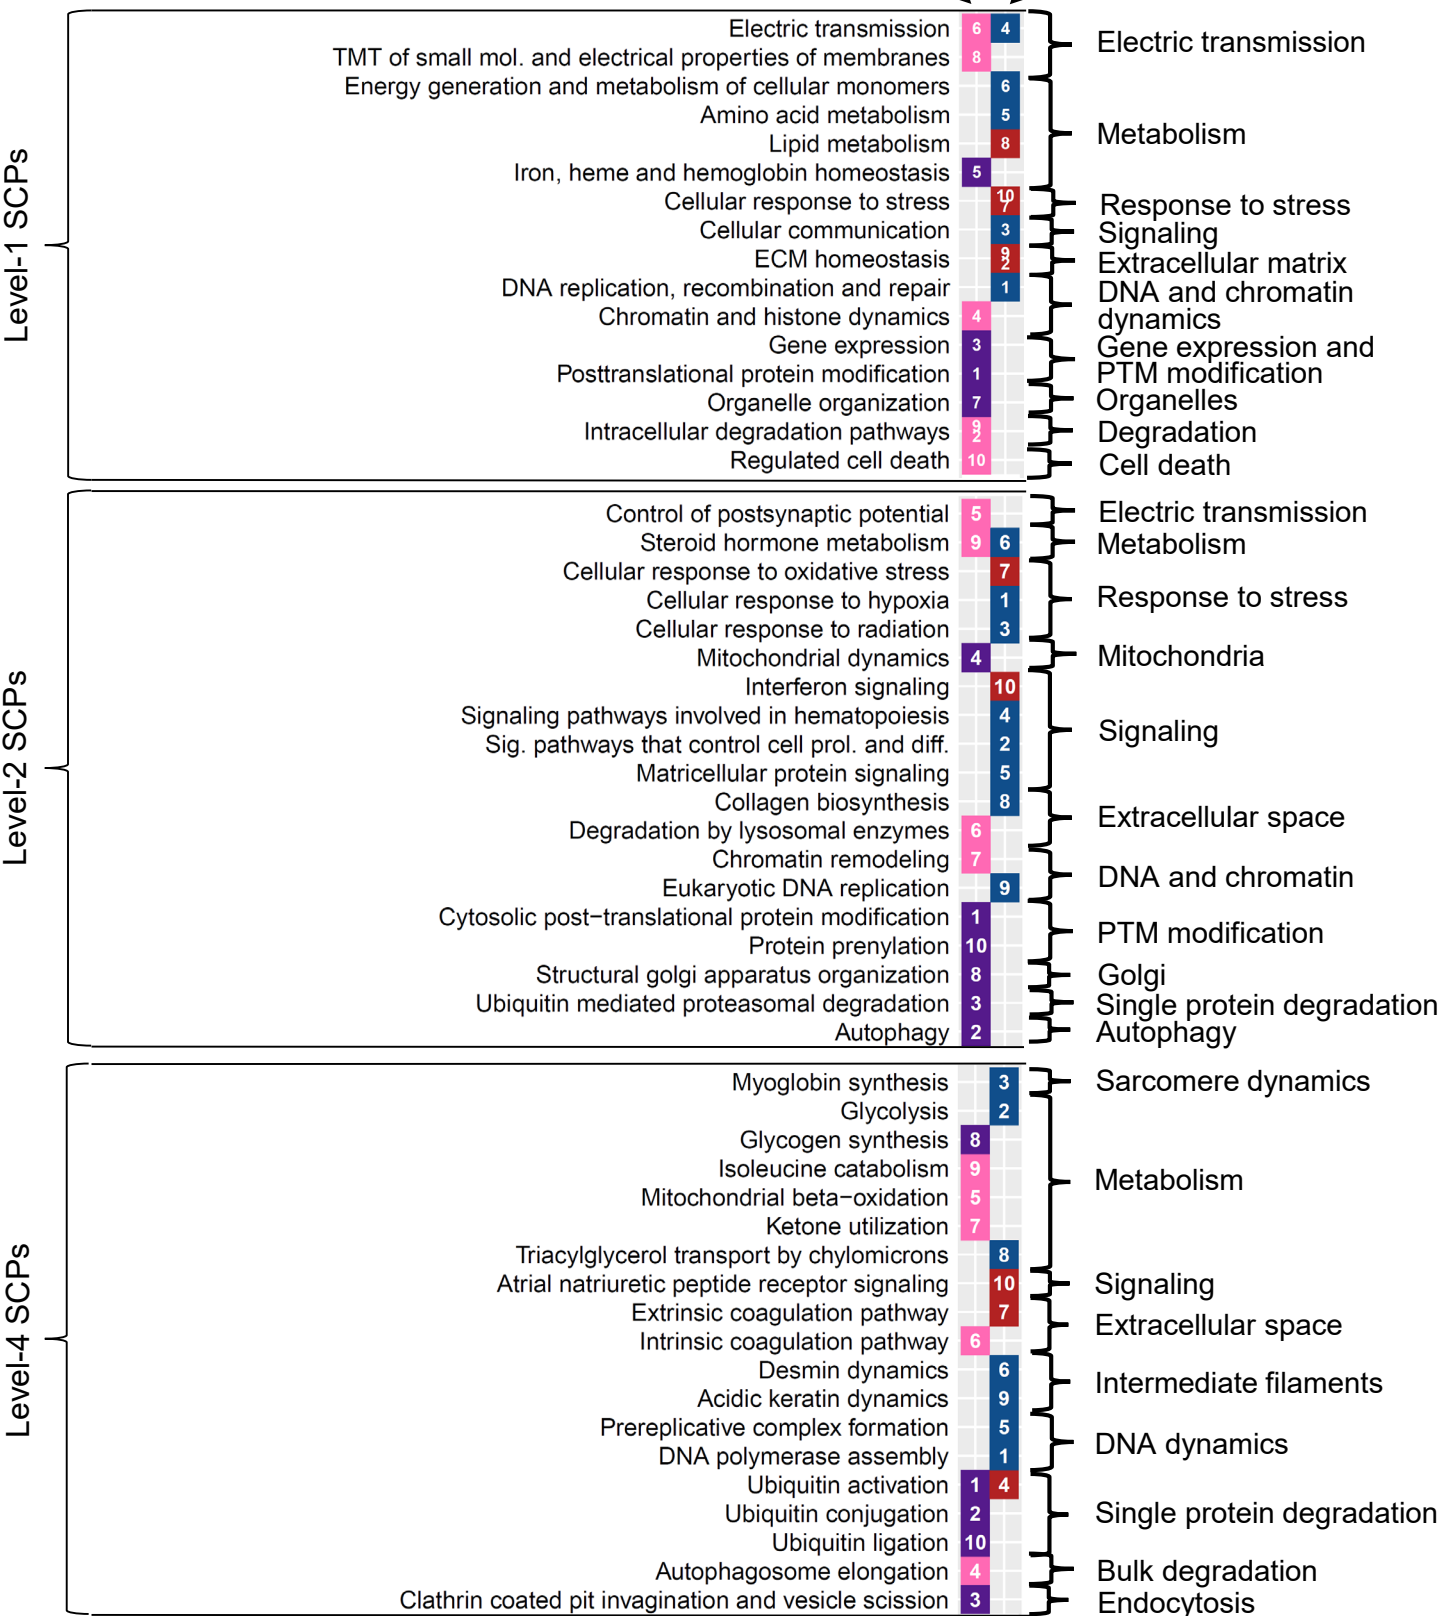

Up by anthracyclines ↑  
 Down by anthracyclines ↓

Up by very cardiotoxic TKIs ↑  
 Down by very cardiotoxic TKIs ↓

**Supplementary Fig. 25. SCPs associated with responses to anthracycline and highly cardiotoxic TKIs.** Predicted up- and downregulated subcellular processes (SCPs) of the same level were ranked by significance for each drug and cell line. We searched for those SCPs that are up- or downregulated at higher significance ranks by anthracyclines or highly cardiotoxic TKIs (cardiotoxicity frequency > 10%). Identified SCPs were ranked by their selectivity for either anthracyclines or TKIs (white numbers). Shown are the top 25, 10, 10 and 10 predicted level-3, -1, -2 and -4 SCPs for both drug groups. The level-3 SCPs that are up- or downregulated by anthracyclines are also shown in Fig. 2D. PTM: post-translational modification.

## Iron, heme and myoglobin homeostasis

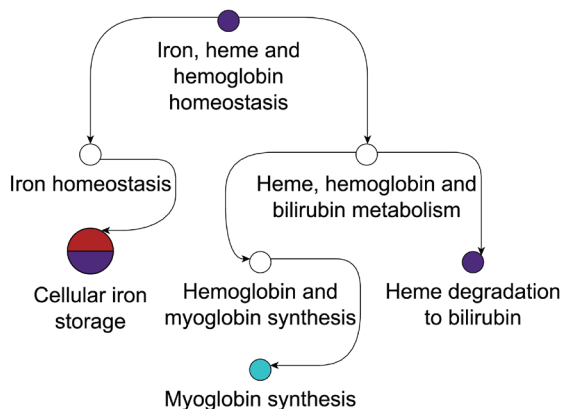

## PTM modification

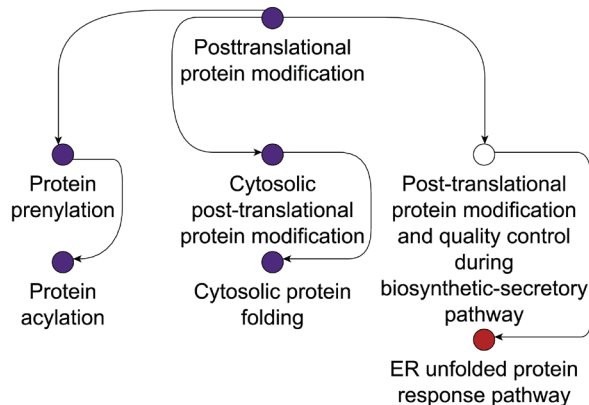

## Single protein degradation

## Bulk degradation

## Cell death

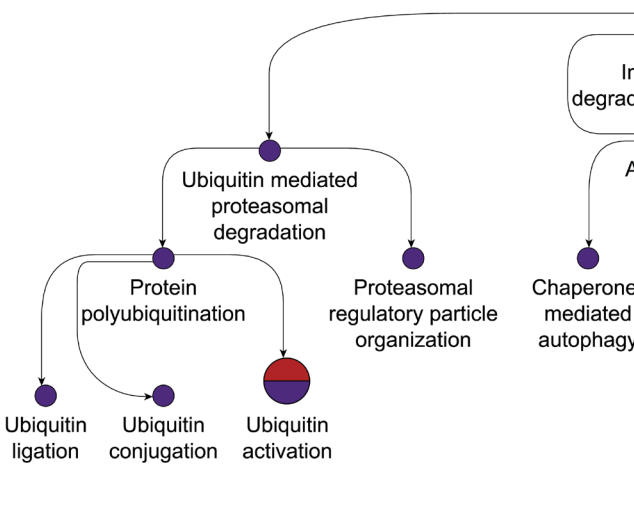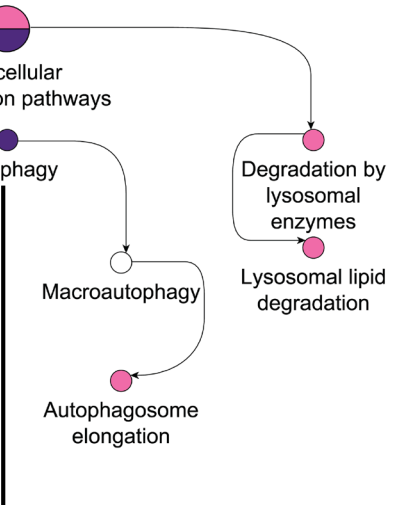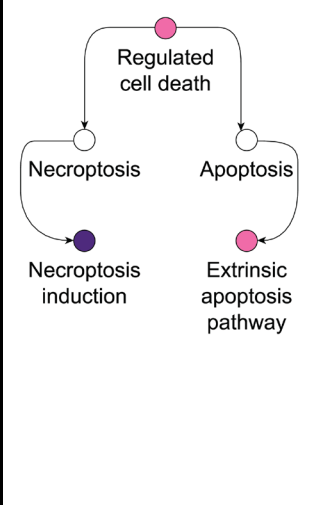

## Chromatin, DNA and cell cycle dynamics

## Organelle dynamics

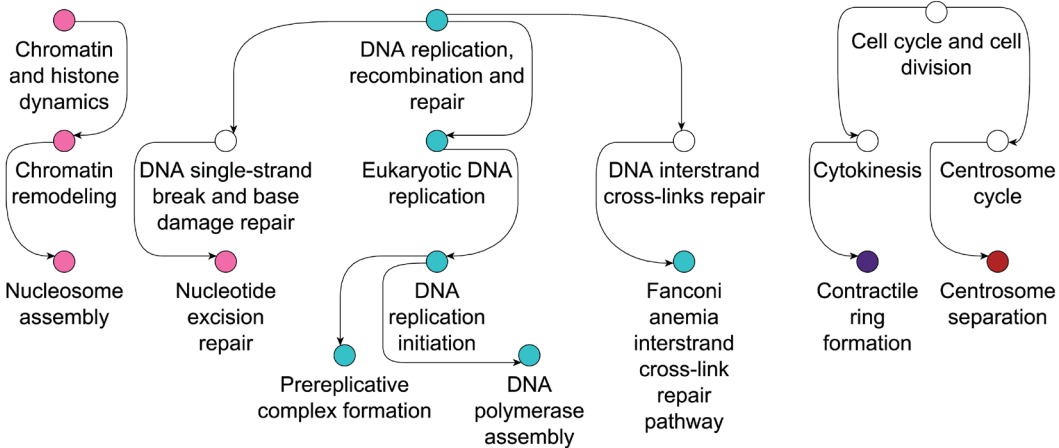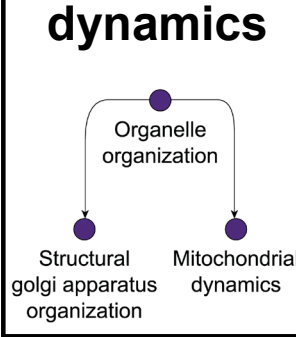

Up by anthracyclines ↑ Up by very cardiotoxic TKIs ↑  
 Down by anthracyclines ↓ Down by very cardiotoxic TKIs ↓

## Cytoskeleton dynamics

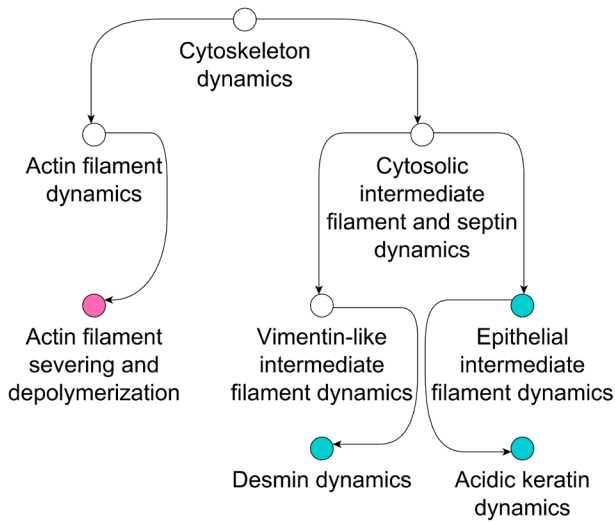

## Electric transmission

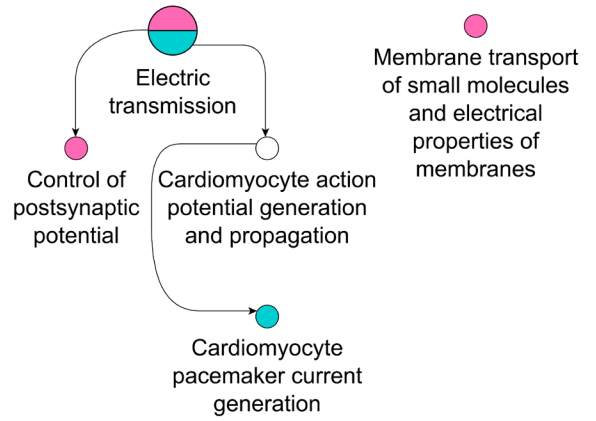

## Metabolism

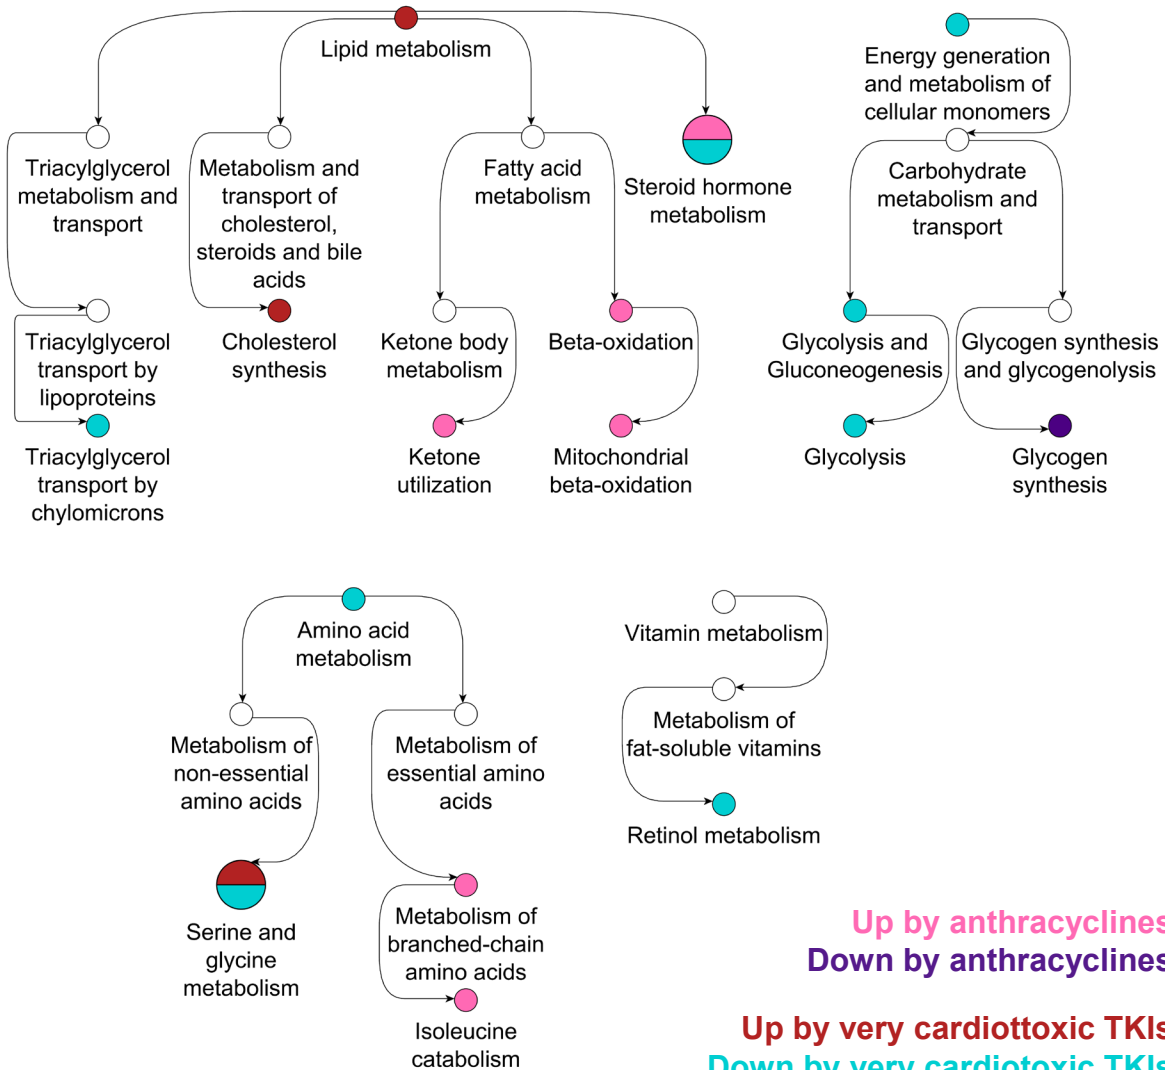

## Response to stress

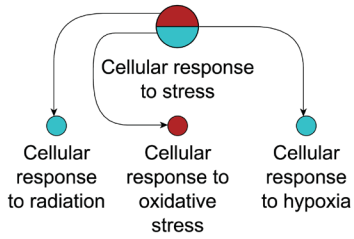

## Vesicle traffic

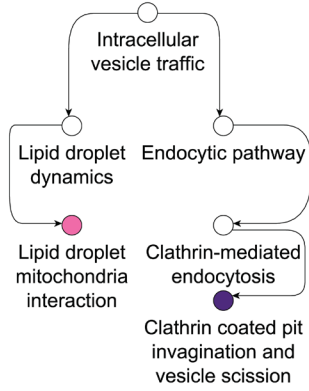

## Gene expression

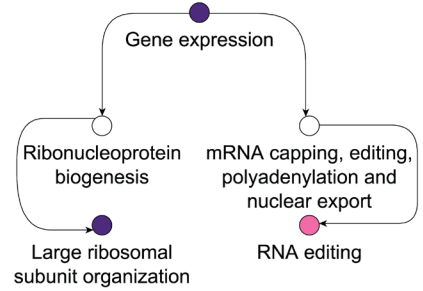

## Extracellular space

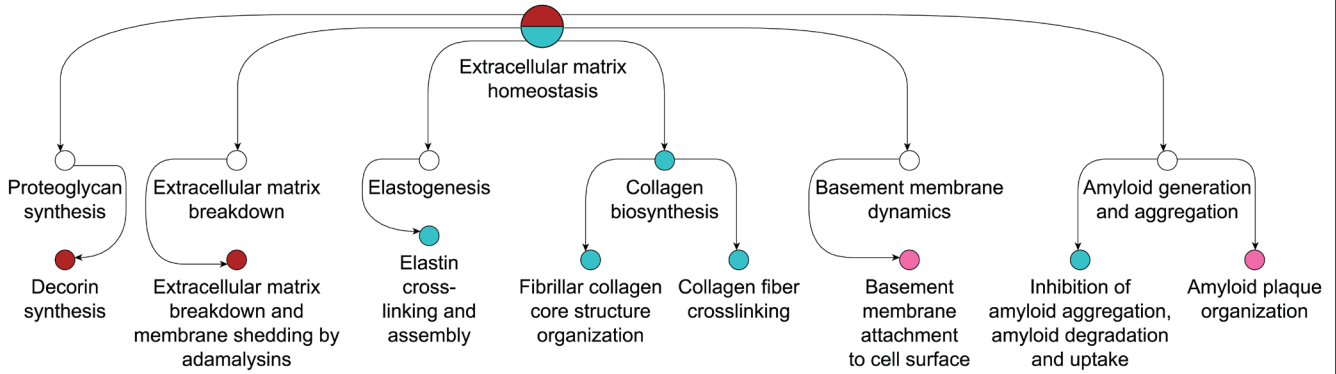

## Signaling

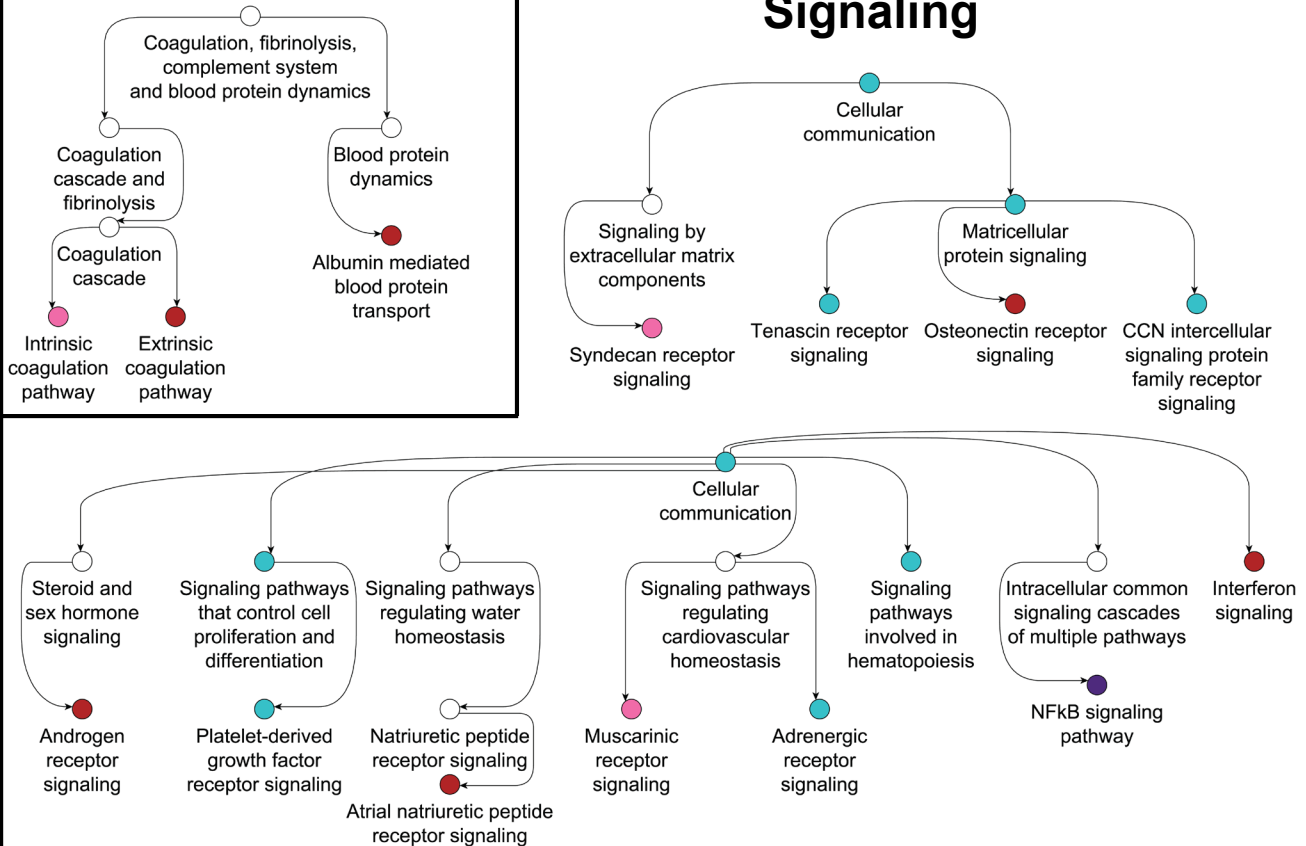

Up by anthracyclines ↑

Up by very cardiotoxic TKIs ↑

Down by anthracyclines ↓

Down by very cardiotoxic TKIs ↓

**Supplementary Fig. 26. Integration of identified SCPs into the MBCO hierarchy.** Up- and downregulated SCPs associated with anthracycline or highly cardiotoxic TKI treatment were integrated into the MBCO hierarchy. Arrows point from parent to child SCPs. Each tree starts with a level-1 SCP and then consecutively connects it to predicted level-2, -3 and -4 SCPs. Non-predicted SCPs that are ancestors of predicted SCPs are in white. Most of the SCPs on the first page are also shown in main figure 2E. PTM: post-translational modification.



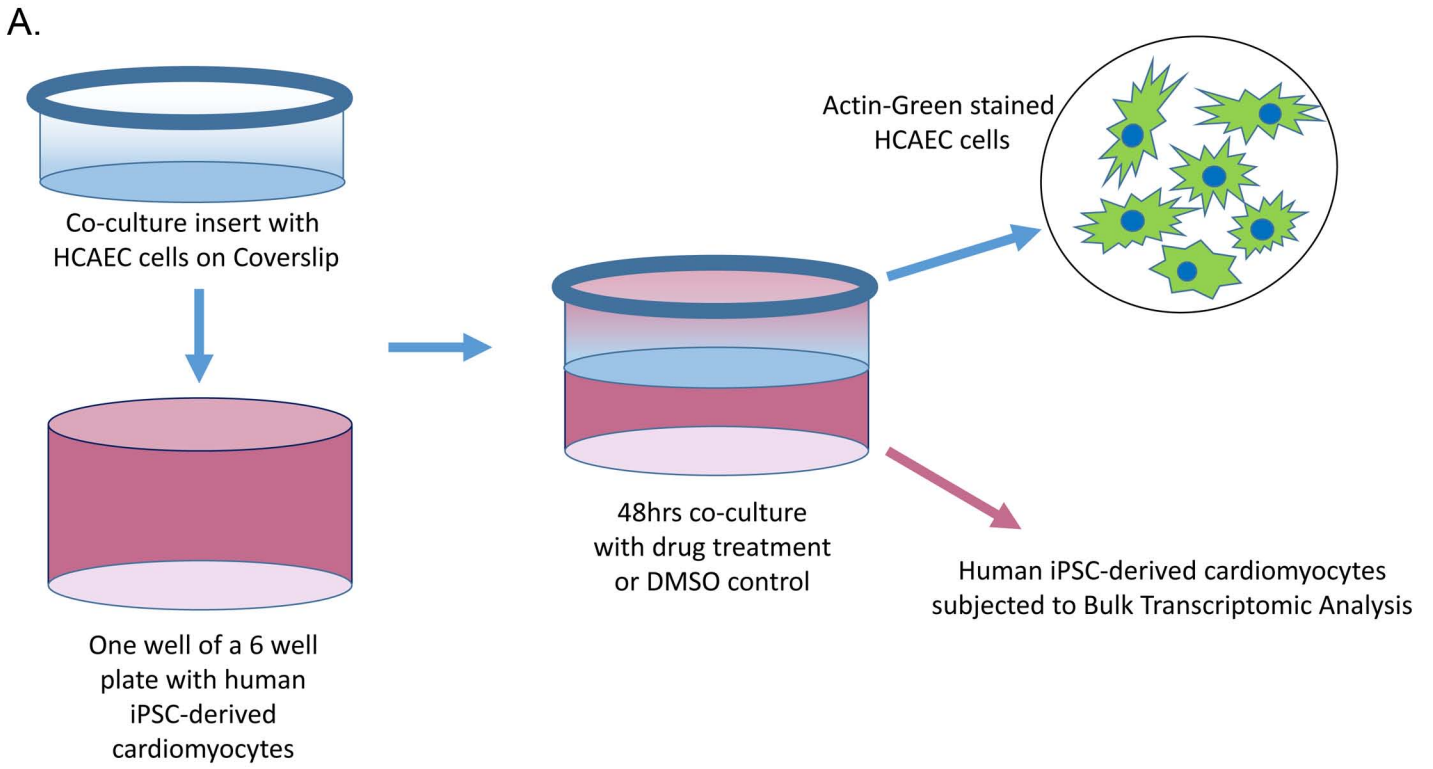

**B. Human Coronary Artery Endothelial Cells (HCAEC) stained with Actin-Green**

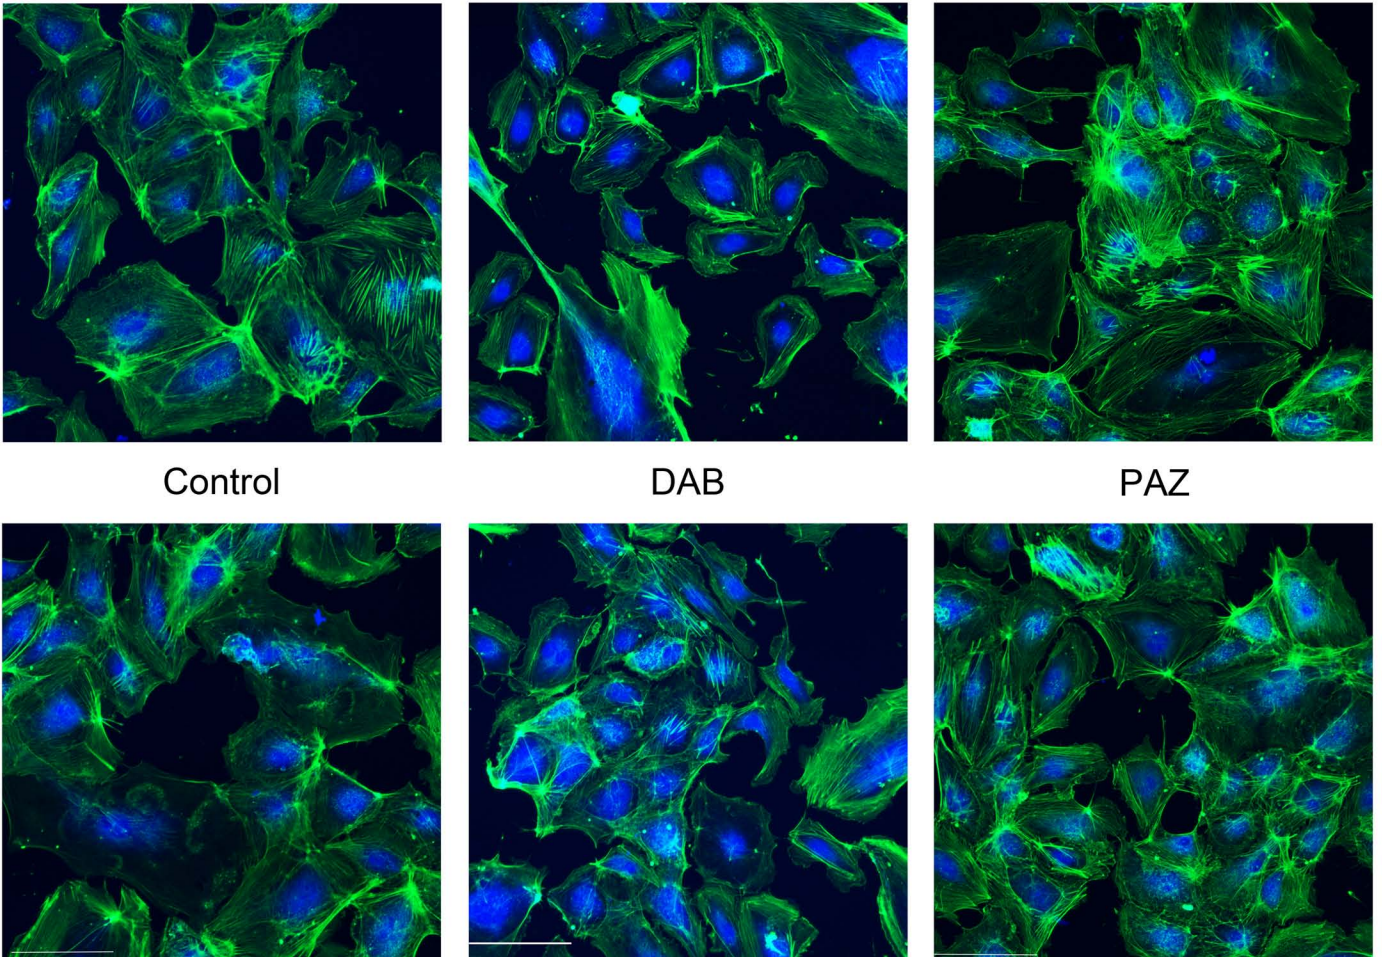

**Supplementary Fig. 27. Cardiomyocyte-endothelial cell cocultures. (A)** iPSC-derived cardiomyocyte (CM) cell lines MSN08 and MSN09 were incubated for 24 hours with or without human coronary artery endothelial cells (HCAEC). HCAEC were seeded on a well insert consisting of a glass coverslip and a porous filter allowing communication between HCAEC and iPSC-CM. Pazopanib, dabrafenib or control vehicles were added to the media, followed by an additional 48 hours before cardiomyocyte harvesting and HCAEC fixation. Cardiomyocytes were subjected to bulk transcriptomic sequencing. **(B)** ACTIN green staining of HCAEC documents endothelial cell phenotypes.

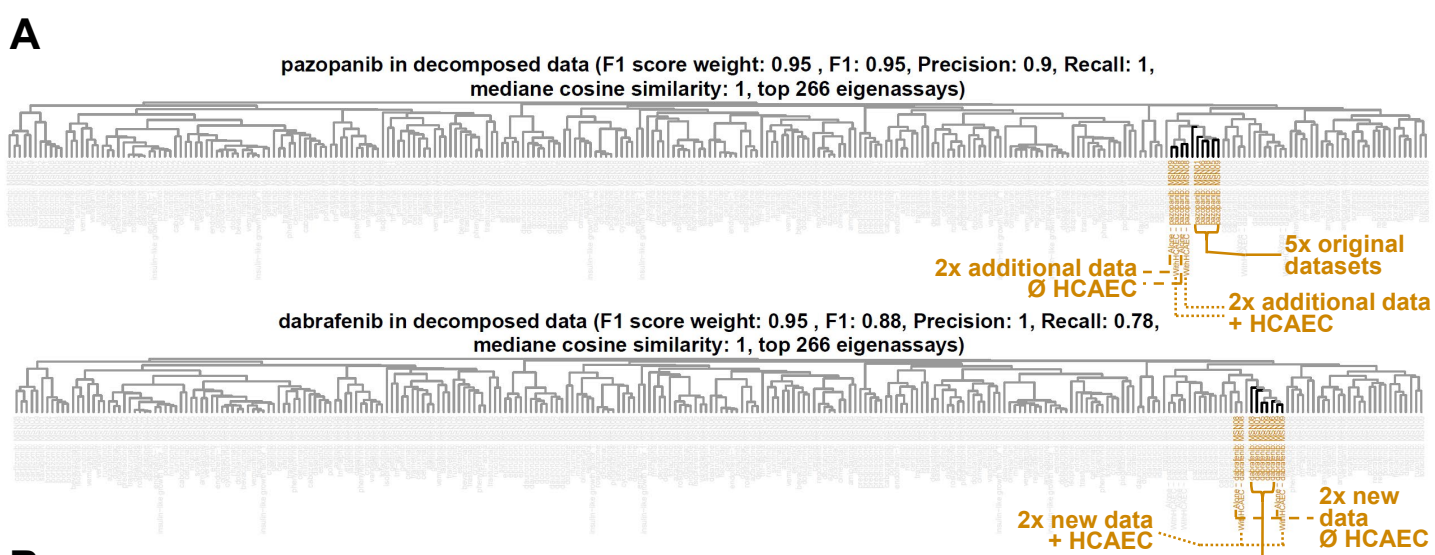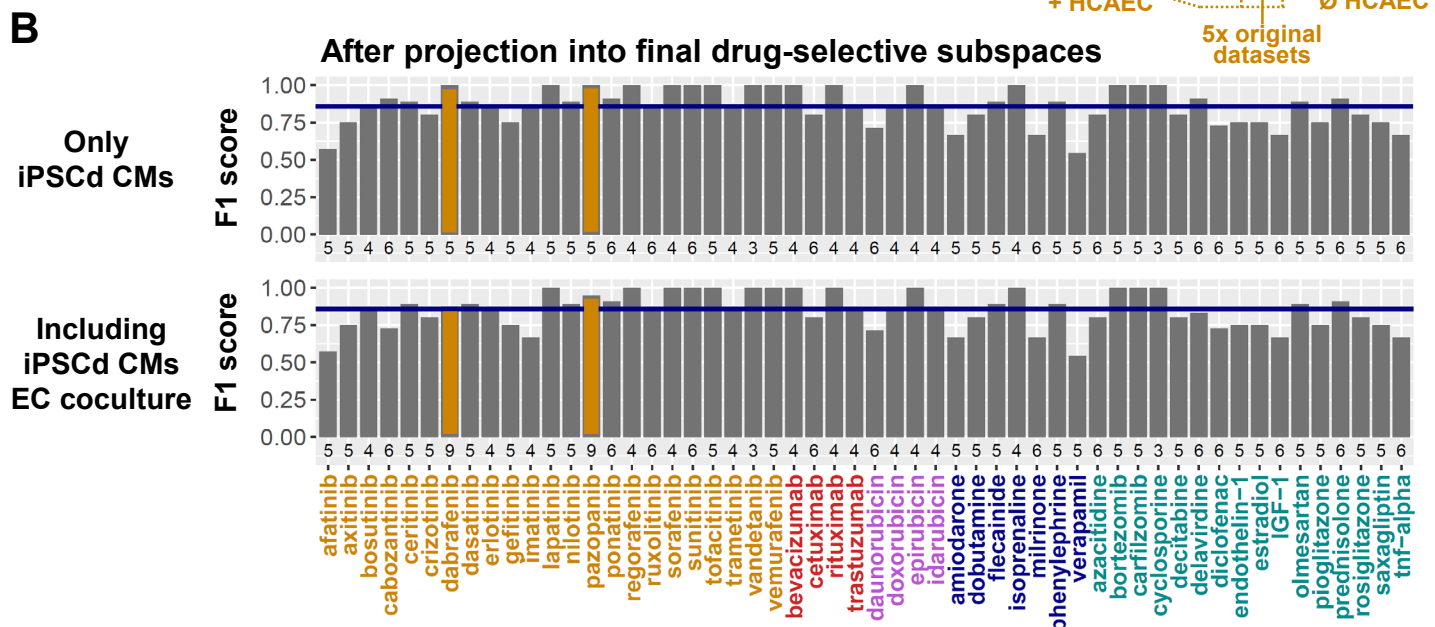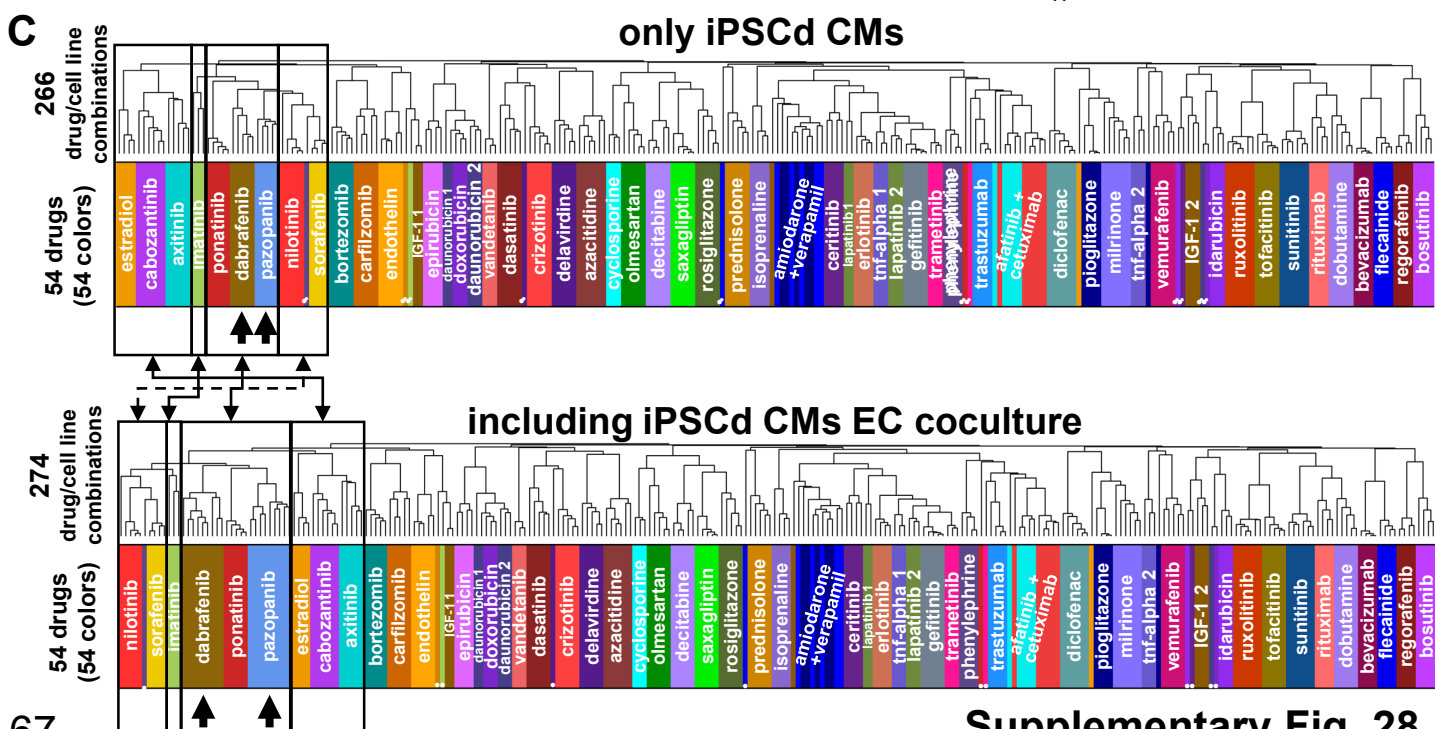

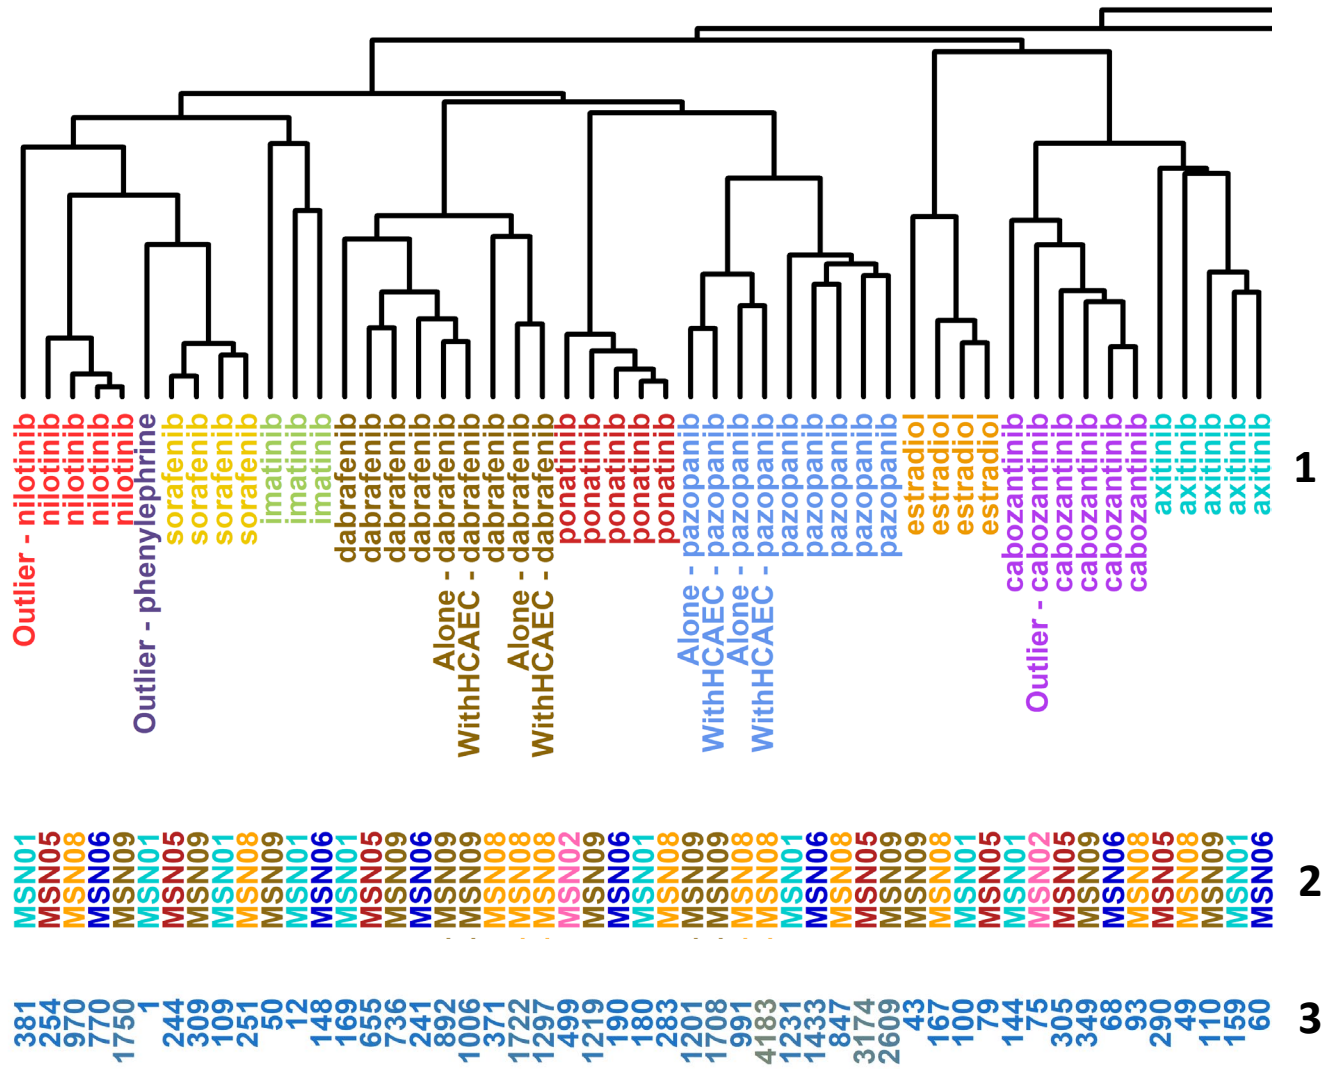

**Supplementary Fig. 28. Projection of DEGs from cardiomyocyte-endothelial cell co-culture experiments into drug-selective subspaces.** DEGs induced by pazopanib or dabrafenib with or without HCAEC coculture were calculated in cell lines MSN08 and MSN09. The generated additional eight lists of DEGs were merged with the original 266 lists. **(A)** Projection of the combined 274 lists of DEGs into the pazopanib- or dabrafenib-selective subspaces (that were identified using only the original data of 266 lists of DEGs) revealed close clustering of the new pazopanib and dabrafenib-treated cell lines with the existing cell lines treated with the same drugs. A different clustering behavior of the new data generated with or without HCAEC coculture was not observed. **(B)** Comparison of the F1 scores obtained for each drug within its selective subspace, obtained either after projecting the 266 (upper panel) or 274 (lower panel) lists of DEGs, shows only minor differences. Orange bars highlight F1 scores for pazopanib and dabrafenib. The upper panel is identical with the panels shown in Figure 1D and Suppl. Figure 10B. **(C)** All drug-selective DEGs, generated by projecting either the original 266 (upper panel) or the extended 274 (lower panel) lists of DEGs were merged, followed by pairwise correlation and hierarchical clustering. The new data caused small rearrangements in the clustering behavior of nine drugs that cluster close to pazopanib and dabrafenib. Boxes frame treatments that got rearranged against each other. The upper panel is identical with the one shown in Figure 1E. **(D)** The figure shows drug treatments (1), cell lines (2) and number of significant DEGs (3) mapping to the dendrogram area that is framed in C, lower panel.

**Supplementary Fig. 29. Top Subcellular Processes predicted from complete gene expression profiles, after removal of first eigenarray and from drug-selective gene expression profiles of all dabrafenib or pazopanib-treated samples. See pages 174 - 182.**

A

# pazopanib

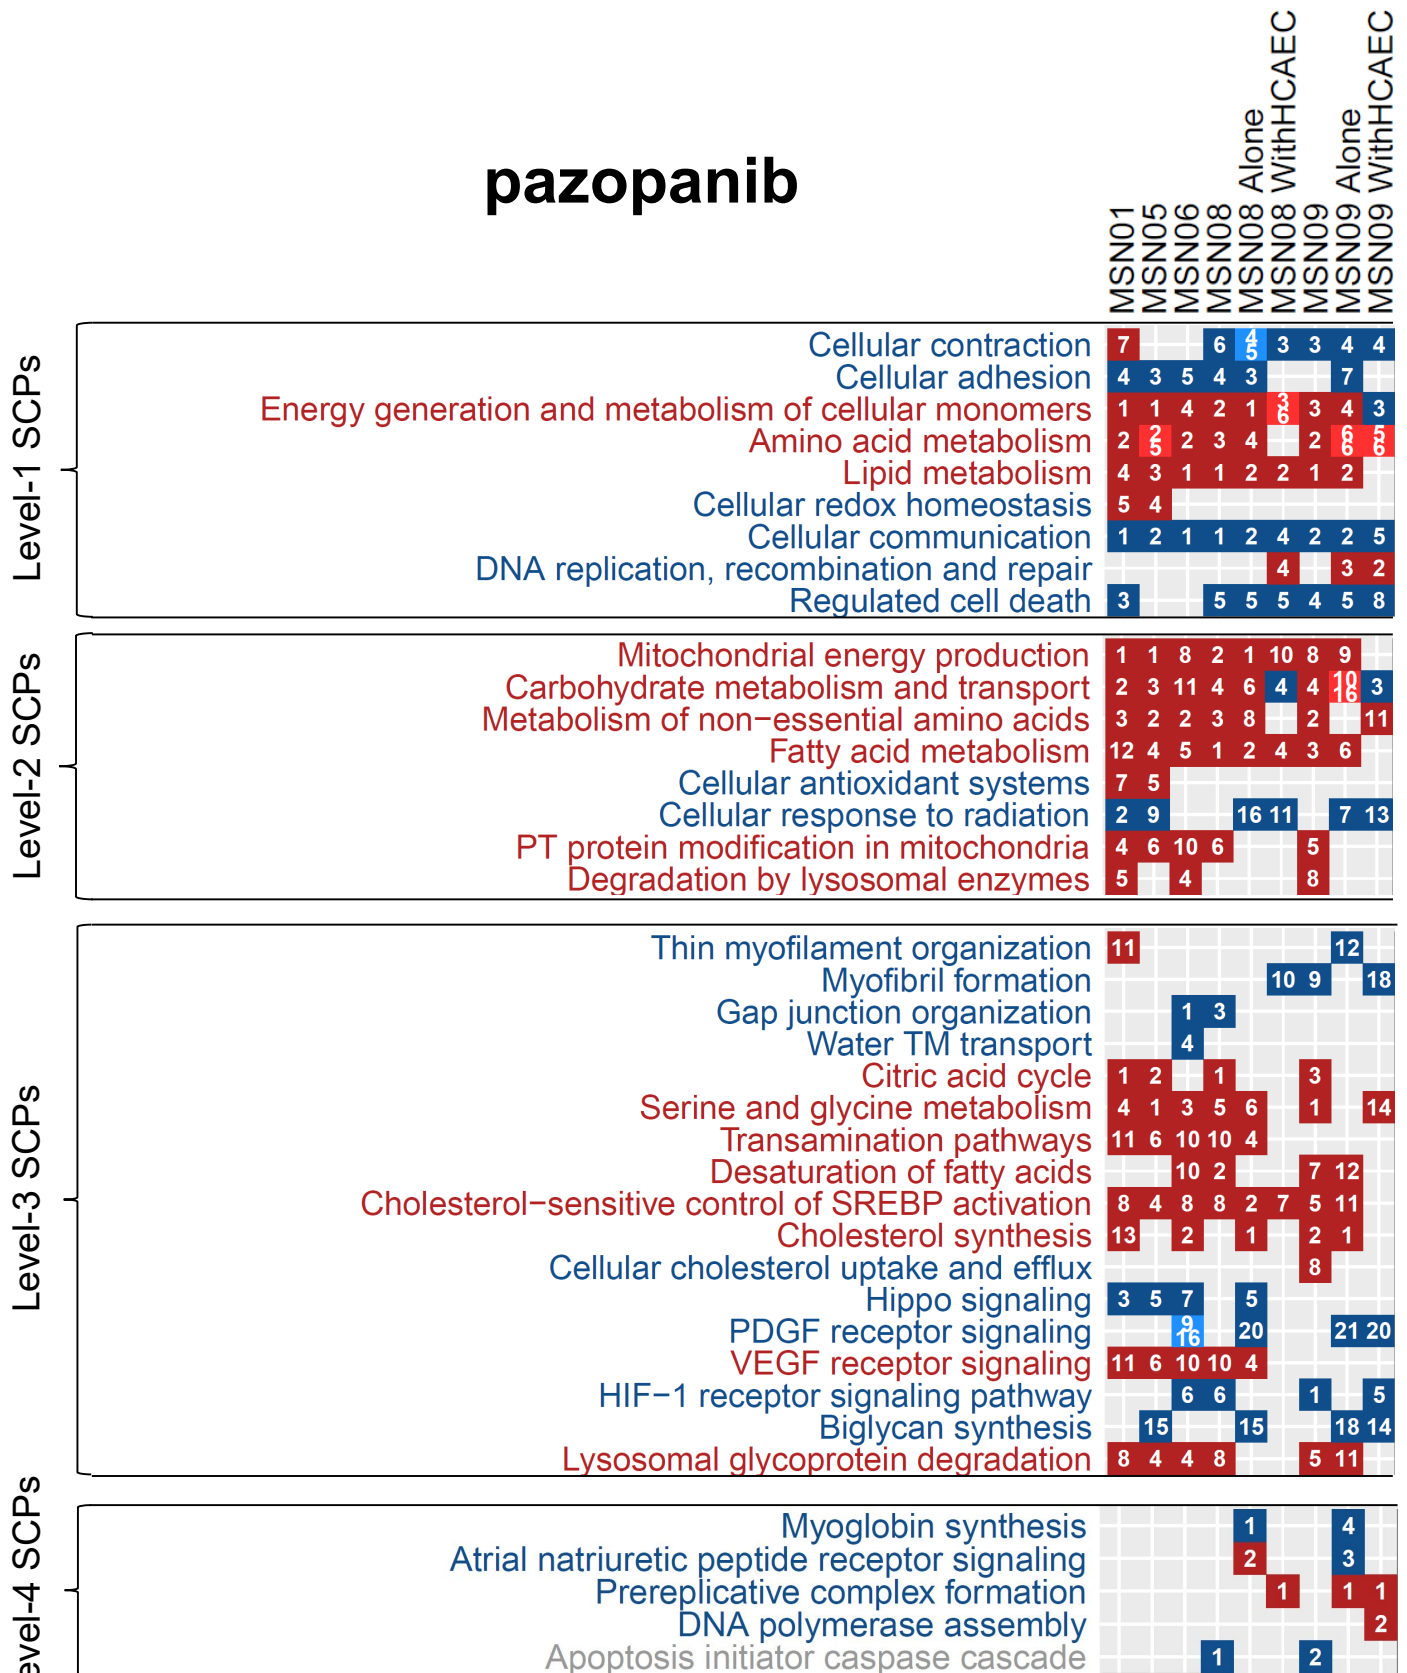

70

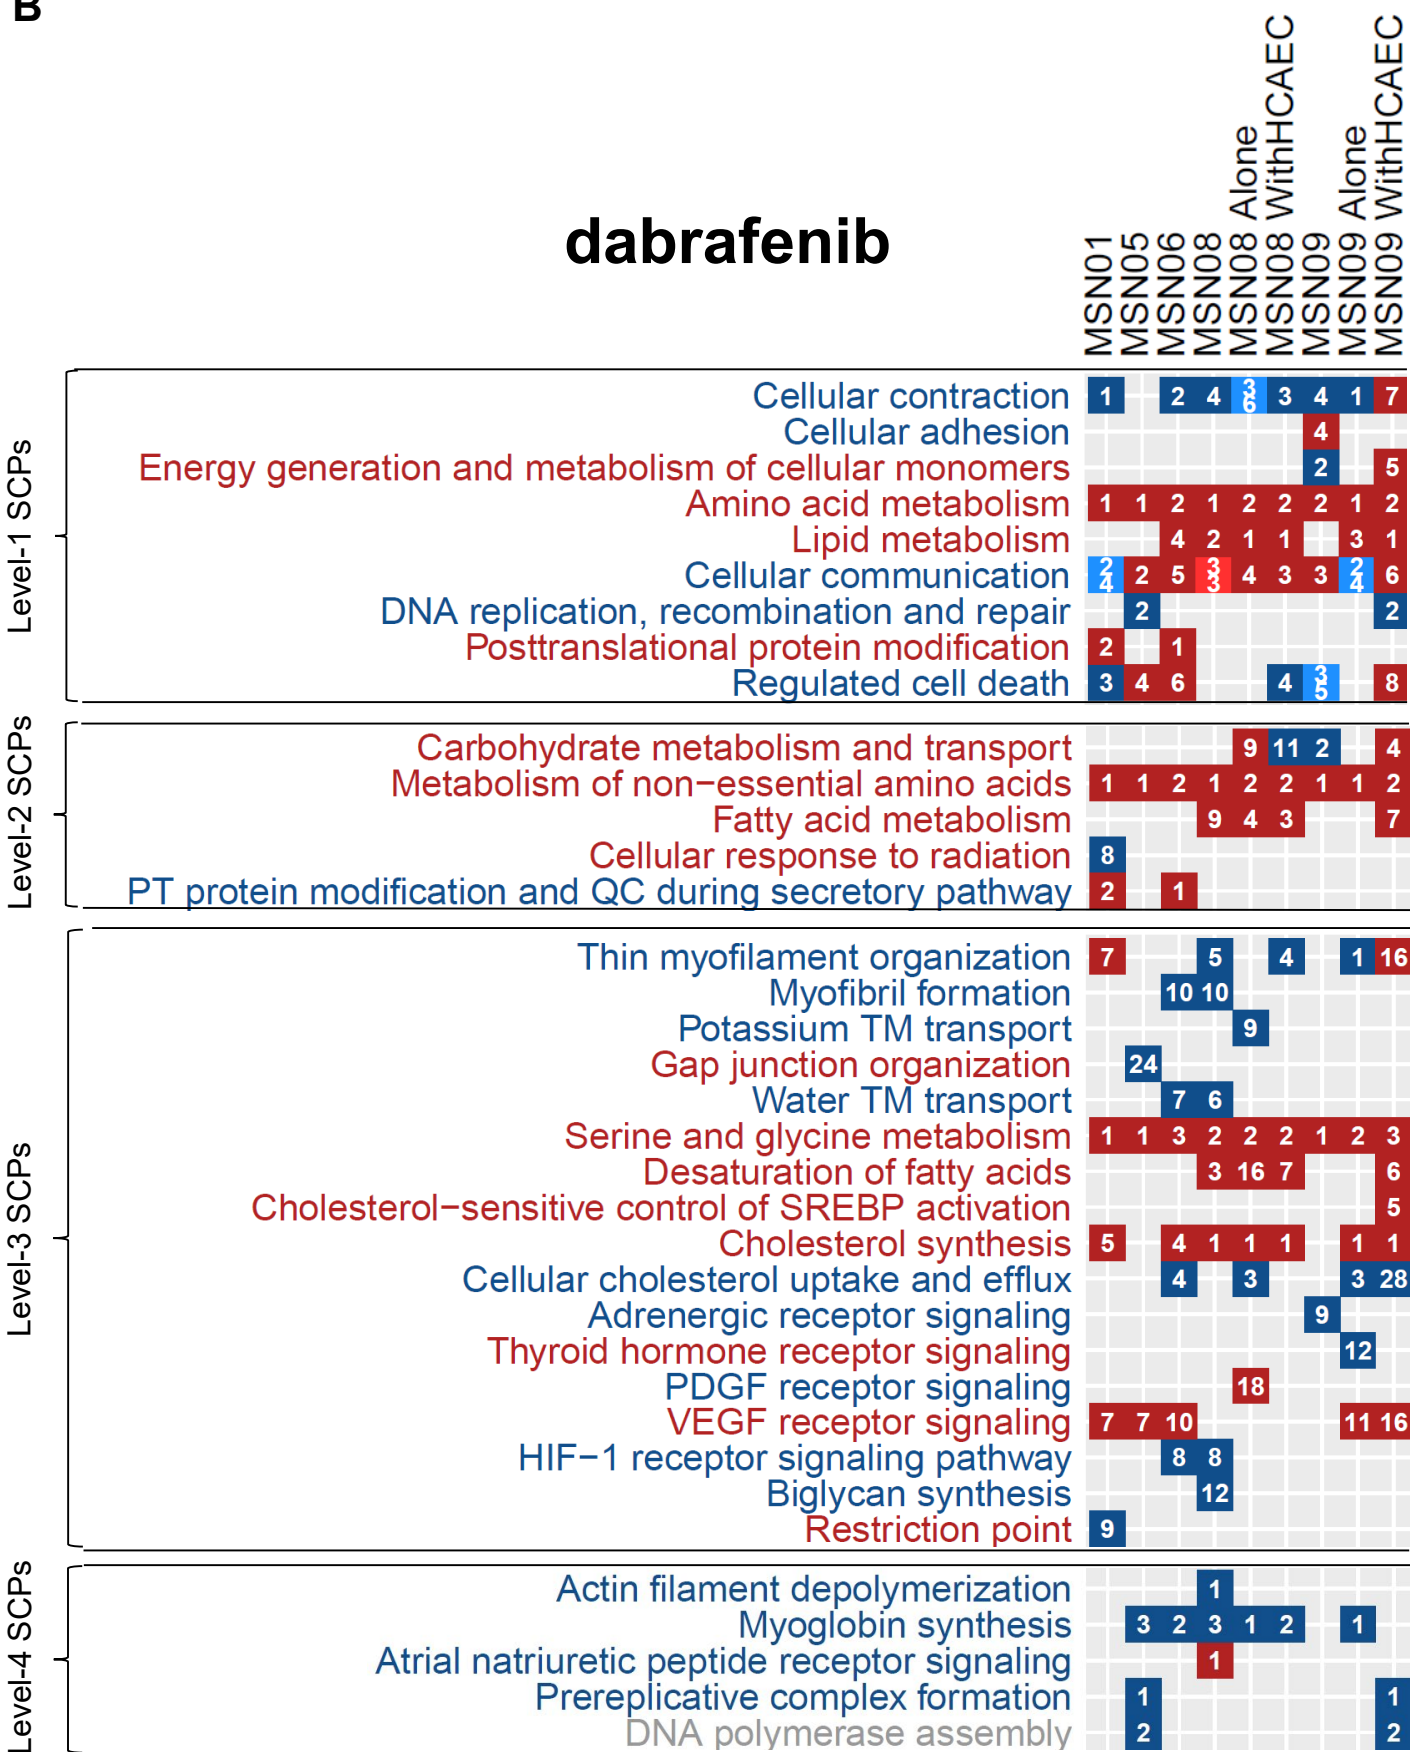

**Supplementary Fig. 30. Coculture with HCAEC has only minor influence on up or down regulation of cardiotoxic pathways.** (A) Enrichment results ( $p$ -value  $\leq 0.05$ ) of DEGs induced by pazopanib were filtered for pathways for which a higher (red SCP names) or lower (blue SCP names) activity favors a cardiotoxic response, as predicted from the cardiotoxic drugs. Gray labels an SCP with conflicting results. Since our F1 score and AUC statistics only considered SCPs with a maximum  $p$ -value of 0.05 and a maximum significance rank of 20, 20, 30 and 20 for level-1, -2, -3 and -4 SCPs, we filtered the pazopanib-induced pathways using the same criteria. Numbers show enrichment ranks in indicated cell lines. Ranks on a red or blue field indicate up- or downregulation. Bright red fields indicate up- and downregulation with the upper and lower rank in that field, respectively. Reversely, light blue fields indicate down- and upregulation with the upper and lower rank in that field, respectively. Original datasets are only labeled with the stimulated cell lines, additional datasets are further labeled with 'Alone' or 'With HCAEC', if they were obtained from cardiomyocytes cultured without or with HCAEC, respectively. (B) The figure shows described results obtained for dabrafenib treatments.



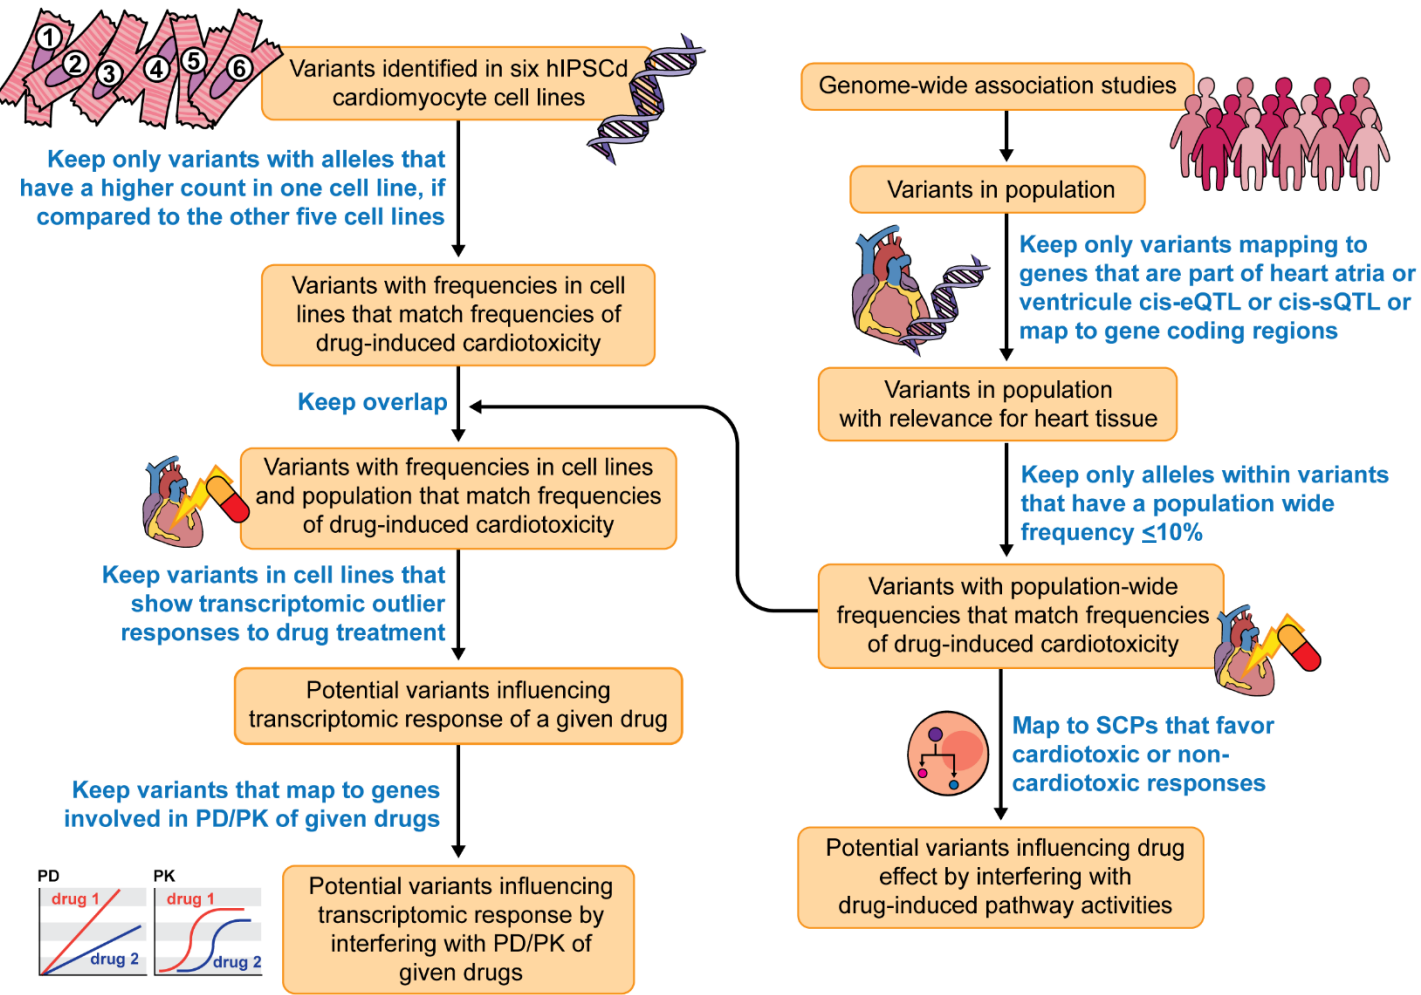

**Supplementary Fig. 31**

**Supplementary Fig. 31. Computational pipeline for the identification of potential genomic variants associated with anthracycline- and TKI-induced cardiotoxicity.** The flow chart shows the steps involved in our pipeline for the identification of genomic variant candidates associated with drug-induced cardiotoxicity. See methods for details. Flow chart is used with permission from Mount Sinai Health System, licensed under CC BY.

### A Genomic variants associated with outlier responses

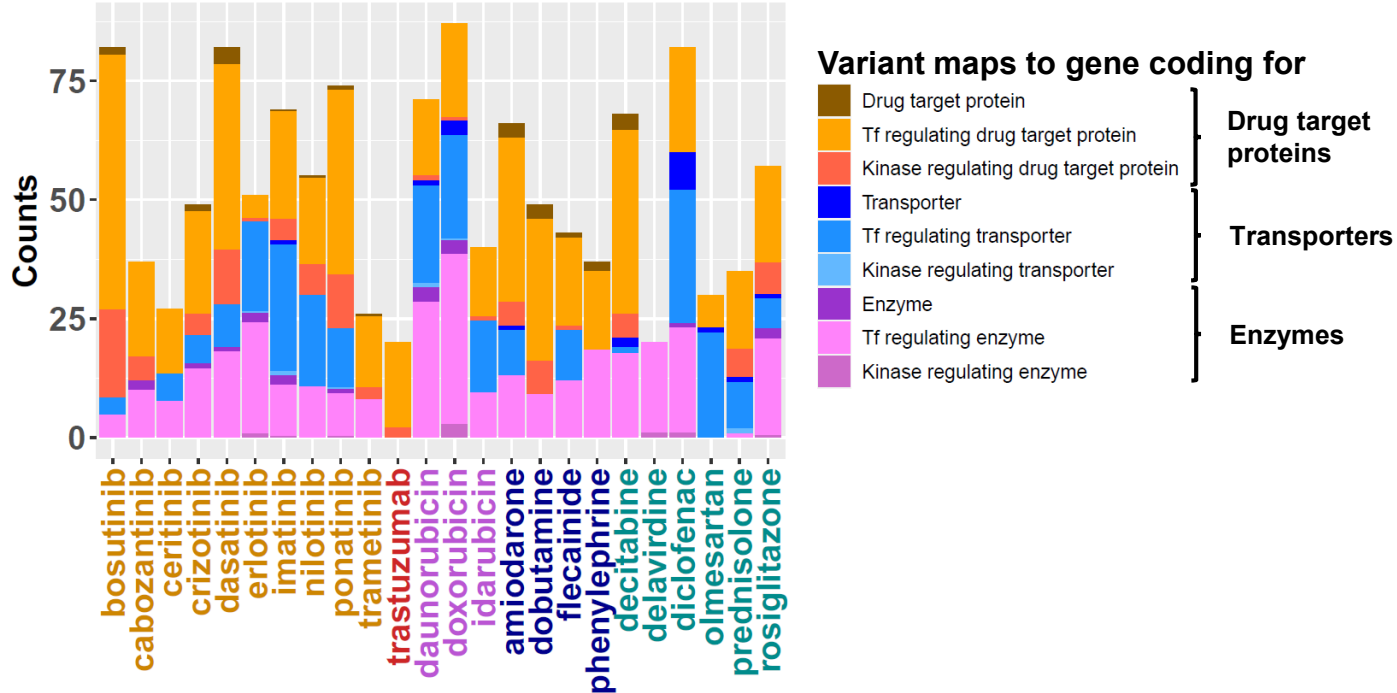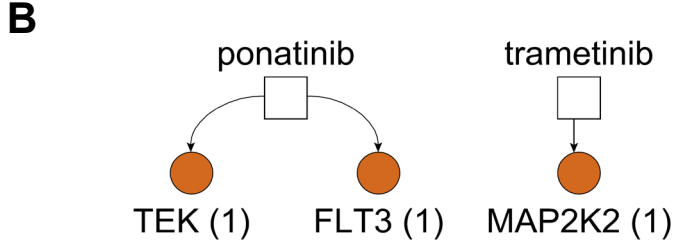

### C Genes with genomic variants associated with outlier responses

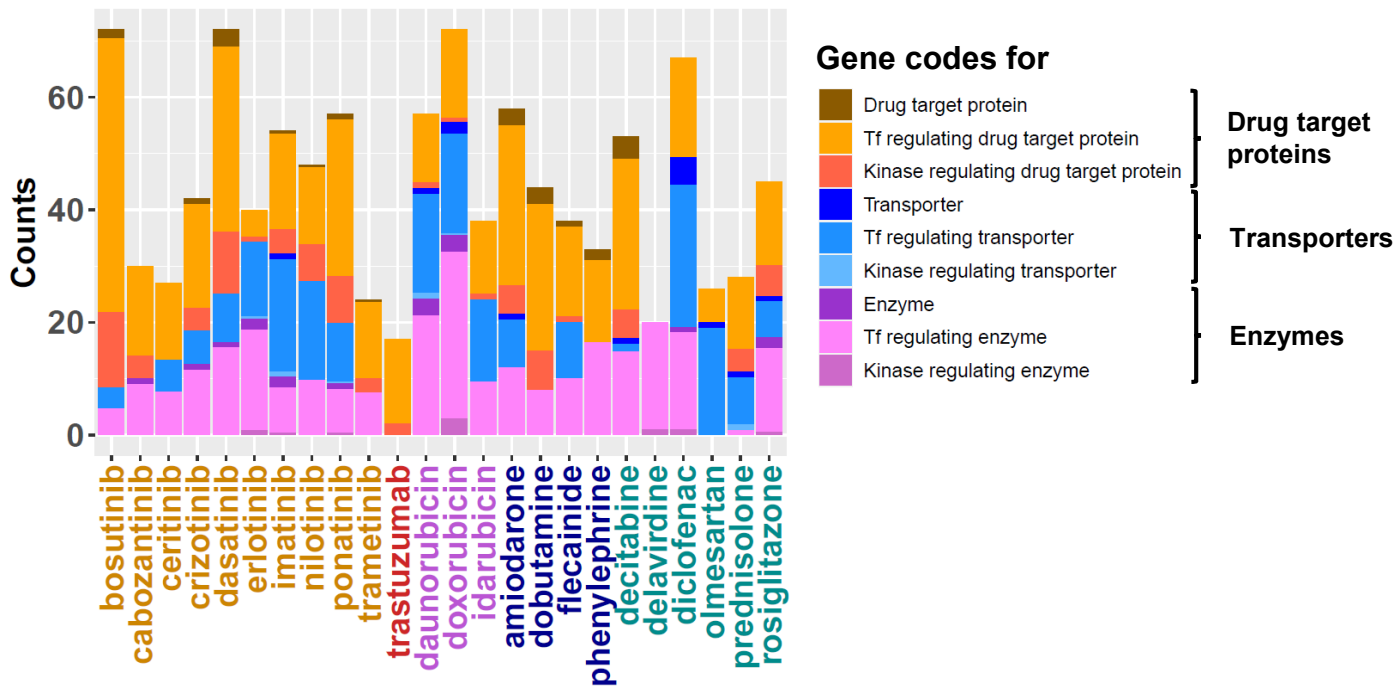

D

## Non-cardiotoxic TKIs

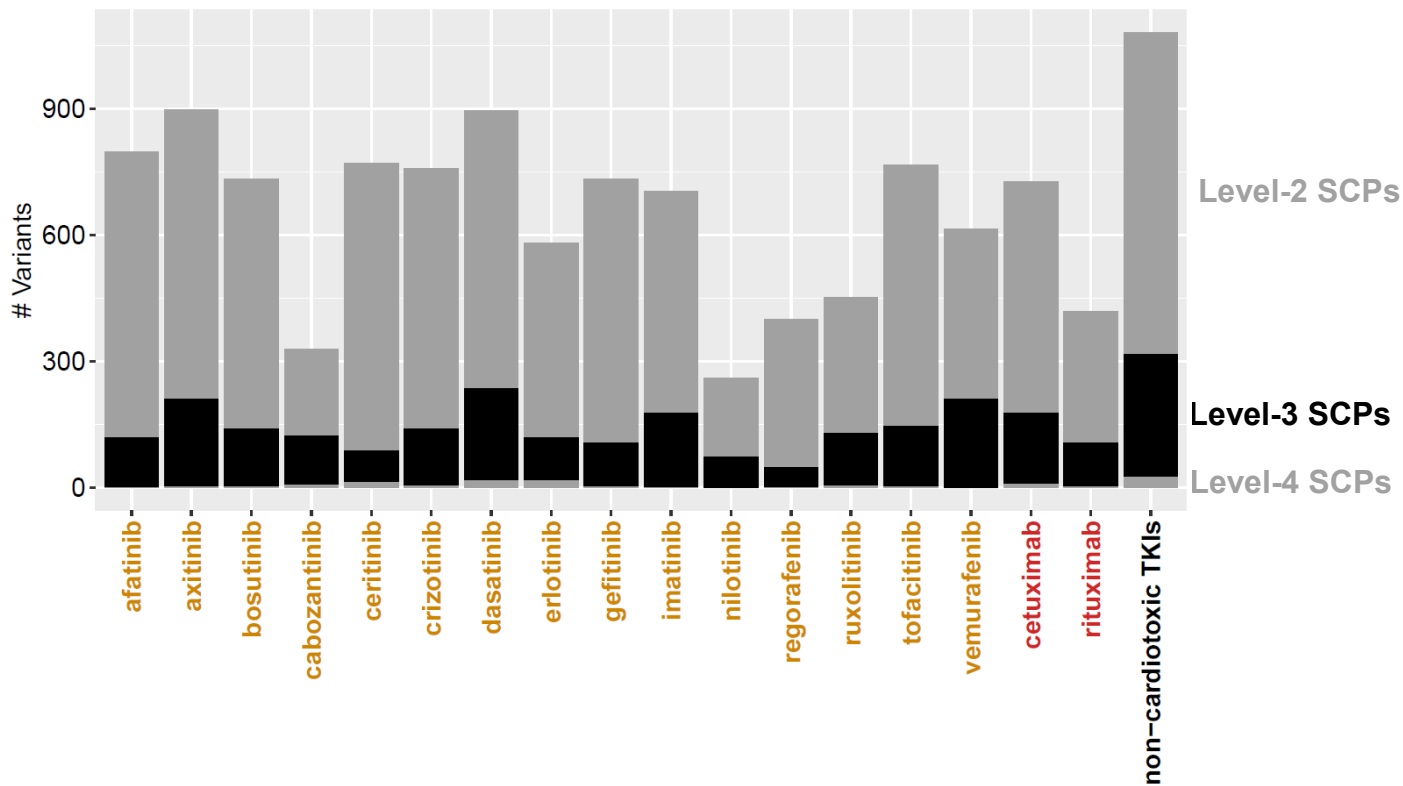

## Supplementary Fig. 32

**Supplementary Fig. 32. Identification of potential genomic variants associated with anthracycline- and TKI-induced cardiotoxicity.** (A) Genomic variants that our algorithm identified as potential regulators of genes involved in a drug's pharmacodynamics (PD) or -kinetics (PK) are shown for all identified small molecule kinase inhibitors (orange), monoclonal antibodies against kinases (red), anthracyclines (purple), cardiac (blue) and non-cardiac (turquoise) acting drugs. The results for the cardiotoxic TKIs and anthracyclines are also shown in Fig. 4E. (B) Three example genes each targeted by one identified variant (numbers in brackets) and code for drug target proteins are shown. (C) Since multiple variants map to the same genes, we also counted the number of genes with at least one variant. (D) Variants passing our population-wide criteria were mapped to up- or downregulated level-2, -3 and -4 SCPs that we predicted to be up- or downregulated at higher ranks by non-cardiotoxic TKIs. Variants that are part of identified SCPs of multiple levels are only counted for the lowest level SCPs (with the highest level numbers) to prevent double counting. See Fig. 4G for results obtained for cardiotoxic TKIs.

**(A) Metadata****1. Materials/Reagents:** Company name, Catalogue and lot numbers

| PRODUCT                                                                                               | COMPANY NAME             | CAT #     | Storage            | Usable life |
|-------------------------------------------------------------------------------------------------------|--------------------------|-----------|--------------------|-------------|
| DMEM (500 mL)                                                                                         | Life Technologies        | 11965-118 | +4°C               | M           |
| IMDM                                                                                                  | Life Technologies        | 12440-053 | +4°C               | M           |
| DMEM/F12                                                                                              | Life Technologies        | 11330057  | +4°C               | M           |
| Penicillin/Streptomycin (100x)                                                                        | Life Technologies        | 15140-122 | +4°C               | M           |
| Sodium-Pyruvate (100 mM)                                                                              | Life Technologies        | 11360-070 | +4°C               | M           |
| L-Glutamine (200 mM)                                                                                  | Life Technologies        | 25030-081 | +4°C               | M           |
| Non-Essential Amino Acids (100x)                                                                      | Life Technologies        | 11140-050 | +4°C               | M           |
| Fetal Bovine Serum (FBS; 500 mL)                                                                      | Corning                  | 35-011-CV | +4°C               | M           |
| EDTA                                                                                                  | Corning                  | 46-034-CI | RT                 | M           |
| KnockOut Serum Replacement                                                                            | Life Technologies        | 10828-028 | -20°C<br>+4°C      | M           |
| mTeSR™:<br>1) mTeSR™ Basal medium<br>2) mTeSR™ 1.5X Supplement                                        | STEMCELL<br>Technologies | 05850     | +4°C<br>-20°C      | M           |
| 2-Mercaptoethanol                                                                                     | MP Biomedicals           | 194705    | RT                 | N/A         |
| TrypLE Express (1X)                                                                                   | Life Technologies        | 12605010  | +4°C               | M           |
| ReLeSR™                                                                                               | STEMCELL<br>Technologies | 05872     | RT                 | M           |
| Gelatin                                                                                               | Sigma                    | G1890     | RT                 | M           |
| Matrigel                                                                                              | Corning                  | 254248    | -20°C<br>+4°C      | M           |
| Dulbecco's phosphate-buffered<br>saline (DPBS)                                                        | Life Technologies        | 14190-136 | +4°C               | M           |
| DMSO                                                                                                  | Fisher Scientific        | BP2311    | RT                 | M           |
| FGF2                                                                                                  | R&D Systems              | 223-FB-10 | -20°C<br>+4°C      | M           |
| Thiazovivin                                                                                           | Millipore                | 420220    | -20°C<br>+4°C      | M           |
| Irradiated MEFs (Mouse Embryonic<br>Fibroblasts)                                                      | Global Stem              | GSC-6001G | Liquid<br>Nitrogen | M           |
| mRNA Reprogramming Kit                                                                                | Stemgent                 | 00-0071   | -70°C              | M           |
| microRNA Booster Kit                                                                                  | Stemgent                 | 00-0073   | -70°C              | M           |
| B18R                                                                                                  | Stemgent                 | 03-0071   | -70°C              | M           |
| Pluriton Supplement (2500x)                                                                           | Stemgent                 | 01-0061   | -80°C              | M           |
| Pluriton Medium (500 mL)                                                                              | Stemgent                 | 01-0015   | -20°C<br>+4°C      | M           |
| Stemfect RNA Transfection Kit:<br>1) Stemfect Transfection Buffer<br>2) Stemfect Transfection Reagent | Stemgent                 | 00-0069   | +4°C               | M           |

|                                                             |                      |           |       |     |
|-------------------------------------------------------------|----------------------|-----------|-------|-----|
| PureLink™ Genomic DNA Mini Kit                              | Life Technologies    | K1820-001 | RT    | N/A |
| e-Myco™ plus Mycoplasma PCR Detection KIT                   | iNtRON Biotechnology | 25235     | -20°C | M   |
| 50 ml conical tube                                          | BD FALCON            | 352098    | RT    | N/A |
| 15 ml conical tube                                          | BD FALCON            | 352099    | RT    | N/A |
| 75 cm <sup>2</sup> Cell Culture Flask                       | Corning              | 430641    | RT    | N/A |
| 50 mL Rapid Flow Conical Filter with a 0.2 µm aPES membrane | Thermo Scientific    | 564-0020  | RT    | N/A |
| 6 well Tissue Culture (TC) plate                            | Corning              | 353046    | RT    | N/A |
| 2 ml Aspirating pipettes                                    | BD FALCON            | 357558    | RT    | N/A |
| 5 ml Serological Pipettes                                   | BD FALCON            | 357543    | RT    | N/A |
| 10 ml Serological Pipettes                                  | BD FALCON            | 357551    | RT    | N/A |
| Hemocytometer                                               | Thermo Scientific    | 0267110   | RT    | N/A |
| 1 mL filter tips                                            | USA Scientific       | 1126-7810 | RT    | N/A |
| 200 µL filter tips                                          | USA Scientific       | 1120-8810 | RT    | N/A |
| 20 µL filter tips                                           | USA Scientific       | 1123-1810 | RT    | N/A |
| 0.1-10 µL filter tips                                       | USA Scientific       | 1121-3810 | RT    | N/A |
| Cryovials                                                   | Nunc                 | 377367    | RT    | N/A |
| Cryo 1°C freezing container                                 | Nalgene              | 5100-0001 | RT    | N/A |
| 2-Propanol                                                  | Thermo Scientific    | A417-4    | RT    | N   |

M; according to manufacture's shelf-life information; RT, room temperature

**2. Subject(s):** subject ID (de-identified), age, gender/sex, race/ethnicity

**3. Fibroblast(s):** subject ID (de-identified), passage number, dates of each passage, date of biopsy, date of initial plating, date of freezing.

**4. Microscopy pictures:** subject ID (de-identified), passage number, date, microscope name (company, catalogue number), magnification.

**(B) Materials used for co-culture experiments**

|                                                                                  |                                 |                    |
|----------------------------------------------------------------------------------|---------------------------------|--------------------|
| HCAEC                                                                            | PromoCell                       | Catalog# C-12221   |
| Endothelial Cell Growth Medium MV Kit                                            | PromoCell                       | Catalog# C-22120   |
| DetachKit (Trypsin/EDTA)                                                         | PromoCell                       | Catalog# C-41210   |
| ActinGreen 488 Ready Probes Reagent                                              | ThermoFisher                    | Catalog# R37110    |
| Poly-L-lysine hydrobromide                                                       | Sigma-Aldrich                   | Catalog# P1274     |
| Glass circular coverslips (18mm)                                                 | FisherScientific                | Catalog# 12-545-86 |
| Nunc Polycarbonate Cell Culutre Inserts<br>in 6-well plates – Pore size of 0.4µm | ThermoFisher                    | Catalog# 140640    |
| Paraformaldehyde 32% aqueous solution                                            | Electron Microscopy<br>Services | Catalog# 15714S    |
| ProLong Gold Antifade Mountant with DAPI                                         | ThermoFisher                    | Catalog# P36931    |

**Supplementary Table 1.** Description of materials used in this study. **(A)** This table lists the materials used for the initial experiments. It is taken from the Supplementary Information for Schaniel et al. (Stem Cell Reports. 2021 Dec 14;16(12):3036-3049, pages 9 and 10) <sup>16</sup>, since the two studies were conducted concurrently. © 2021 The Author(s), released under a Creative Commons Attribution-NonCommercial-NoDerivs 4.0 International license. **(B)** This table lists additional materials used for the coculture experiments.

**afatinib after removal of 1st eigenarray , F1: 0.07 , Precision: 0.04 , Recall: 0.4**

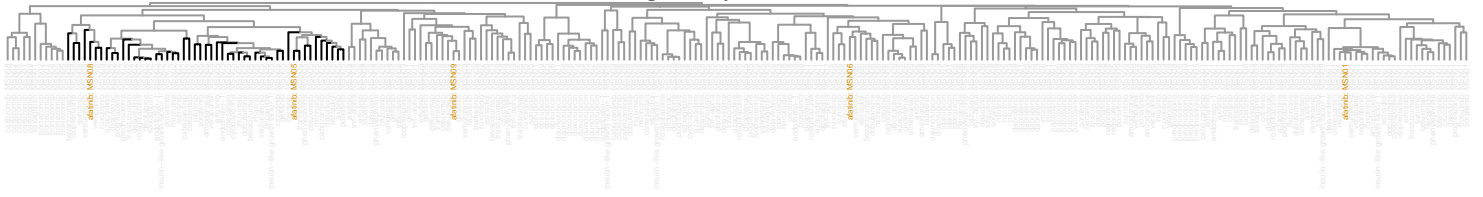

**afatinib in decomposed data (F1 score weight: 0.95 , F1: 0.57, Precision: 1, Recall: 0.4, mediane cosine similarity: 0.41, top 23 eigenarrays)**

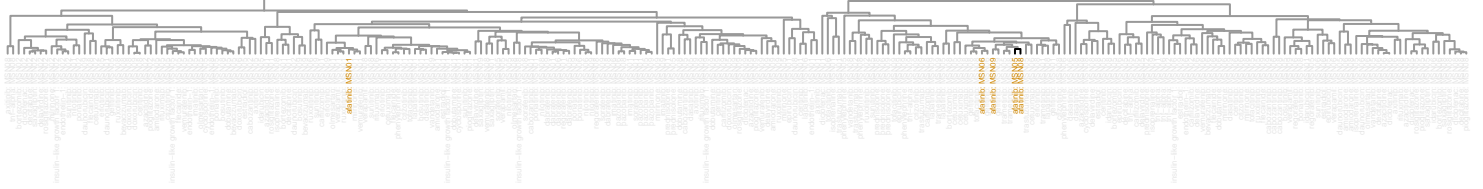

**axitinib after removal of 1st eigenarray , F1: 0.07 , Precision: 0.04 , Recall: 0.4**

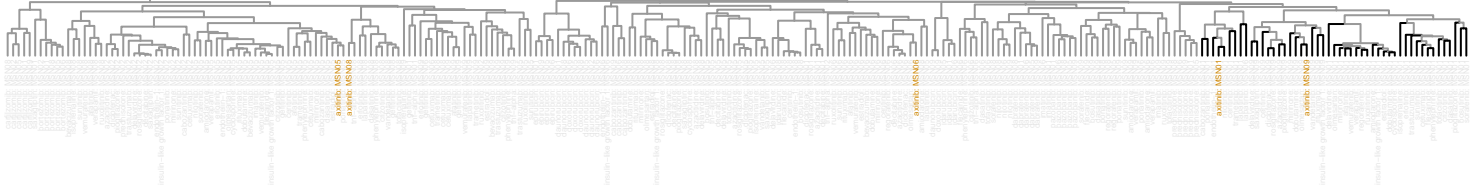

**axitinib in decomposed data (F1 score weight: 0.95 , F1: 0.75, Precision: 1, Recall: 0.6, mediane cosine similarity: 0.39, top 50 eigenarrays)**

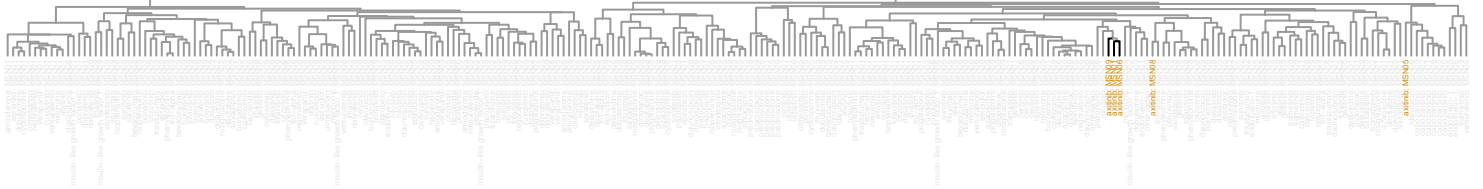

**bosutinib after removal of 1st eigenarray , F1: 0.09 , Precision: 0.05 , Recall: 0.5**

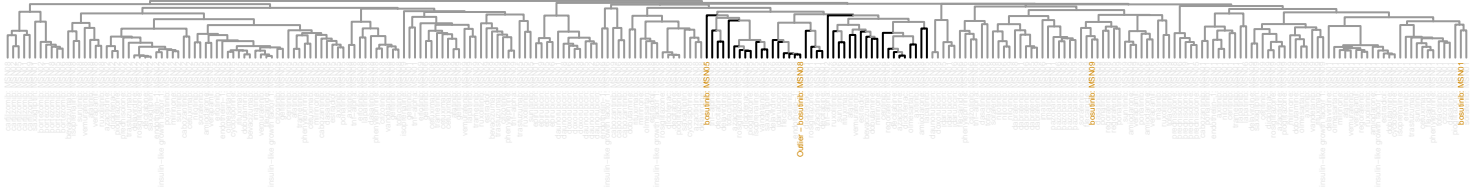

**bosutinib in decomposed data (F1 score weight: 0.65 , F1: 0.86, Precision: 1, Recall: 0.75, mediane cosine similarity: 0.22, top 24 eigenarrays)**

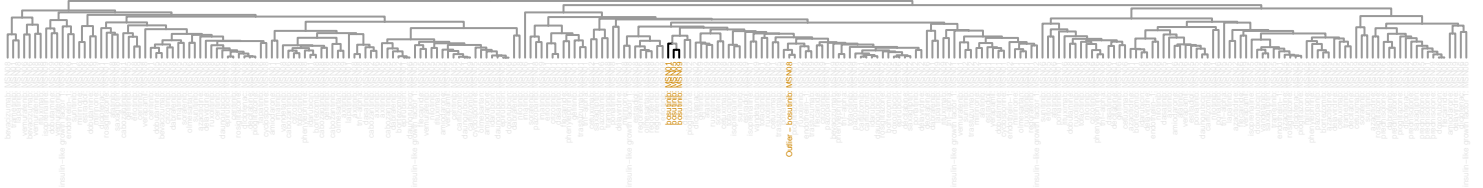

**cabozantinib after removal of 1st eigenarray , F1: 0.67 , Precision: 1 , Recall: 0.5**

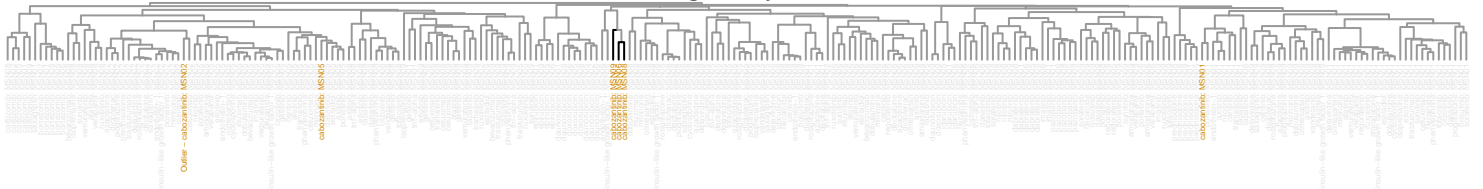

**cabozantinib in decomposed data (F1 score weight: 0.5 , F1: 0.91, Precision: 1, Recall: 0.83, mediane cosine similarity: 0.76, top 57 eigenarrays)**

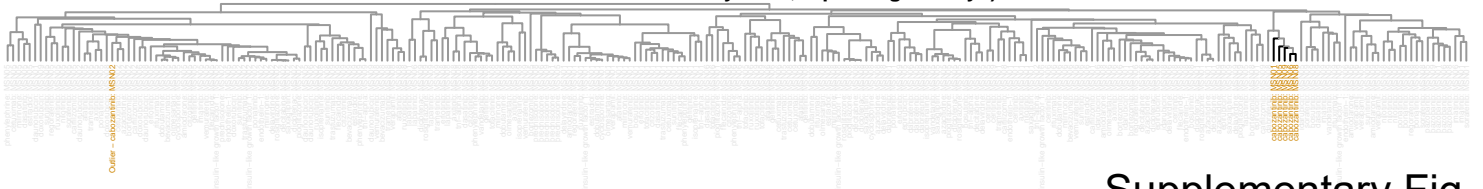

**ceritinib after removal of 1st eigenarray , F1: 0.12 , Precision: 0.07 , Recall: 0.4**

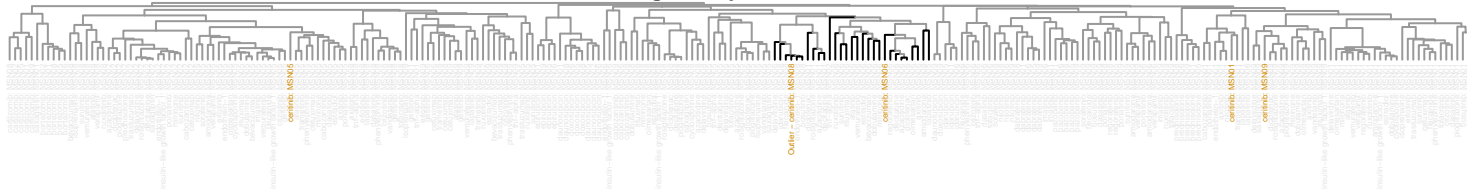

**ceritinib in decomposed data (F1 score weight: 0.15 , F1: 0.89, Precision: 1, Recall: 0.8, mediane cosine similarity: 0.88, top 86 eigenarrays)**

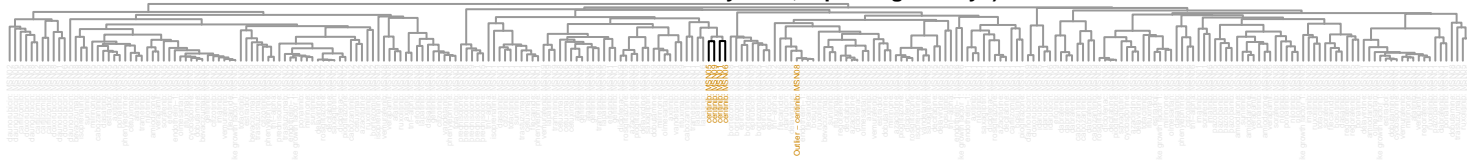

**crizotinib after removal of 1st eigenarray , F1: 0.1 , Precision: 0.06 , Recall: 0.4**

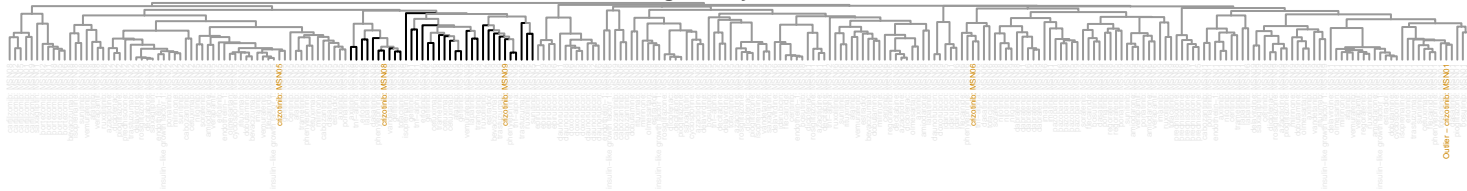

**crizotinib in decomposed data (F1 score weight: 0.6 , F1: 0.8, Precision: 0.8, Recall: 0.8, mediane cosine similarity: 0.3, top 23 eigenarrays)**

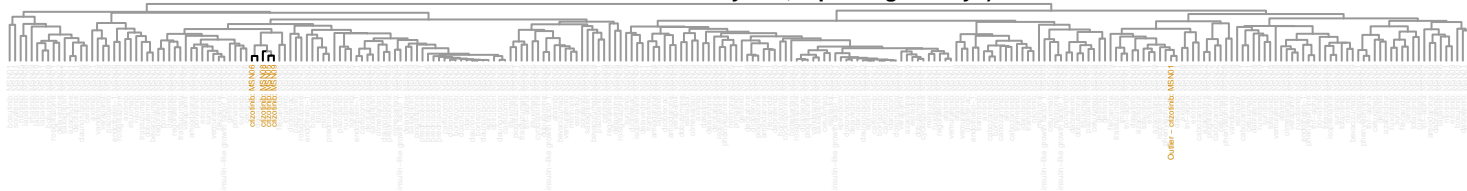

**dabrafenib after removal of 1st eigenarray , F1: 1 , Precision: 1 , Recall: 1**

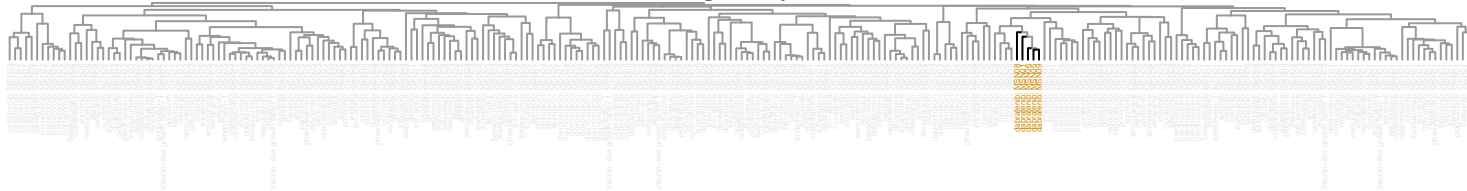

**dabrafenib in decomposed data (F1 score weight: 0.95 , F1: 1, Precision: 1, Recall: 1, mediane cosine similarity: 1, top 266 eigenarrays)**

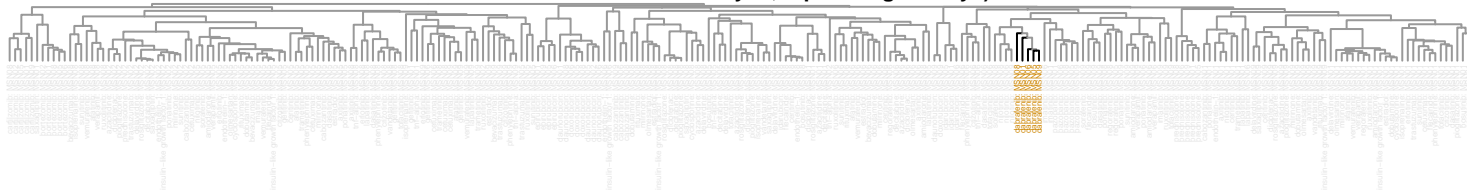

**dasatinib after removal of 1st eigenarray , F1: 0.09 , Precision: 0.05 , Recall: 0.4**

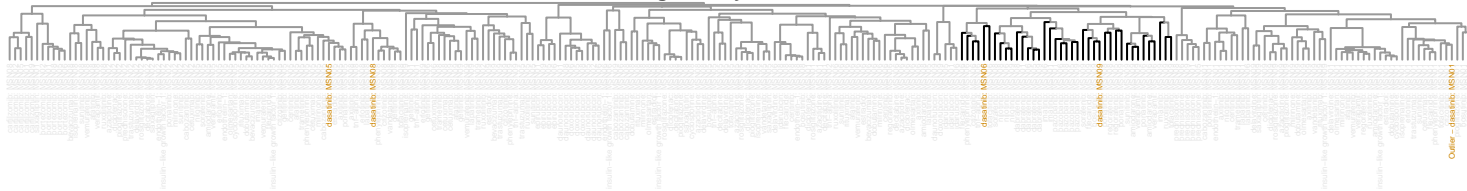

**dasatinib in decomposed data (F1 score weight: 0.6 , F1: 0.89, Precision: 1, Recall: 0.8, mediane cosine similarity: 0.58, top 43 eigenarrays)**

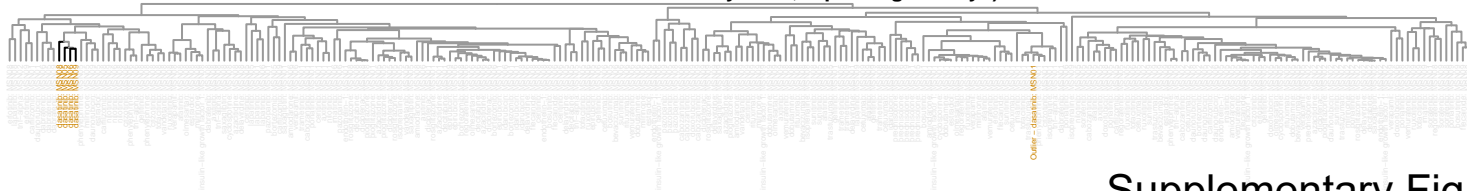



**erlotinib after removal of 1st eigenarray , F1: 0.11 , Precision: 0.06 , Recall: 0.5**

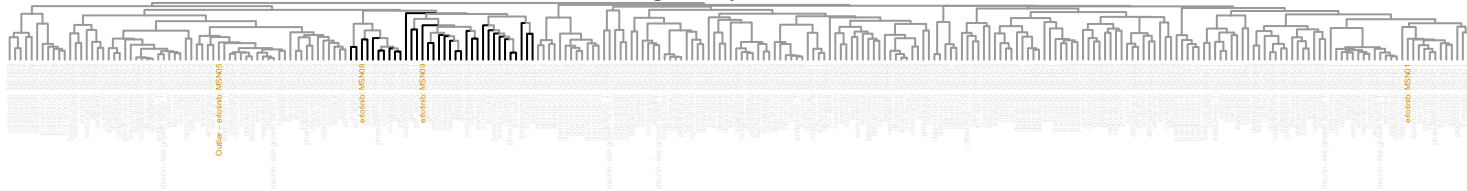

**erlotinib in decomposed data (F1 score weight: 0.55 , F1: 0.86, Precision: 1, Recall: 0.75, mediane cosine similarity: 0.7, top 25 eigenarrays)**

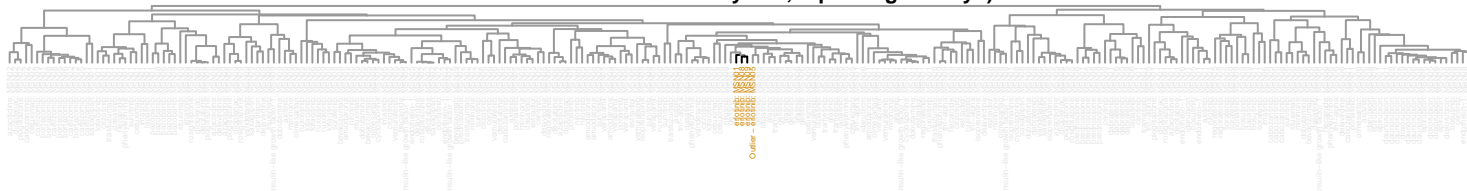

**gefitinib after removal of 1st eigenarray , F1: 0.33 , Precision: 0.23 , Recall: 0.6**

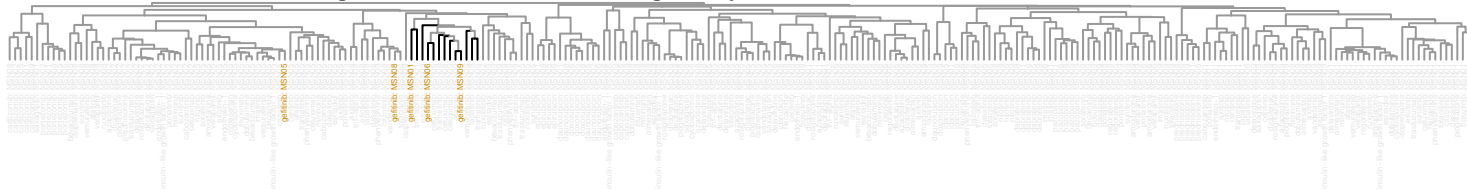

**gefitinib in decomposed data (F1 score weight: 0.95 , F1: 0.75, Precision: 1, Recall: 0.6, mediane cosine similarity: 0.61, top 16 eigenarrays)**

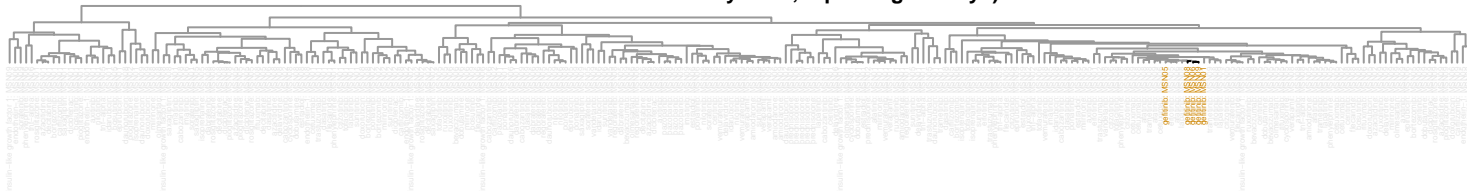

**imatinib after removal of 1st eigenarray , F1: 0.36 , Precision: 0.29 , Recall: 0.5**

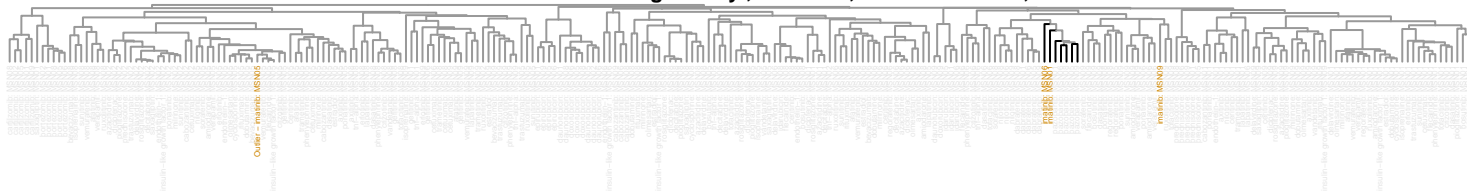

**imatinib in decomposed data (F1 score weight: 0.4 , F1: 0.86, Precision: 1, Recall: 0.75, mediane cosine similarity: 0.84, top 146 eigenarrays)**

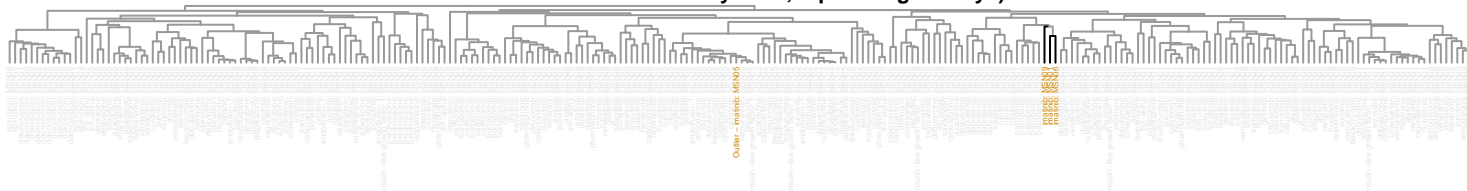

**lapatinib after removal of 1st eigenarray , F1: 0.57 , Precision: 1 , Recall: 0.4**

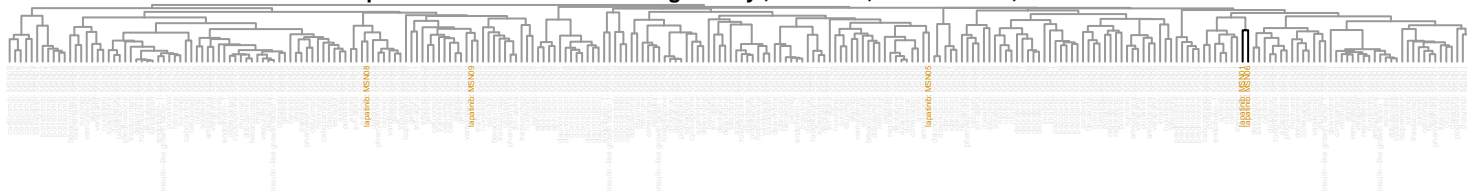

**lapatinib in decomposed data (F1 score weight: 0.95 , F1: 1, Precision: 1, Recall: 1, mediane cosine similarity: 0.75, top 37 eigenarrays)**

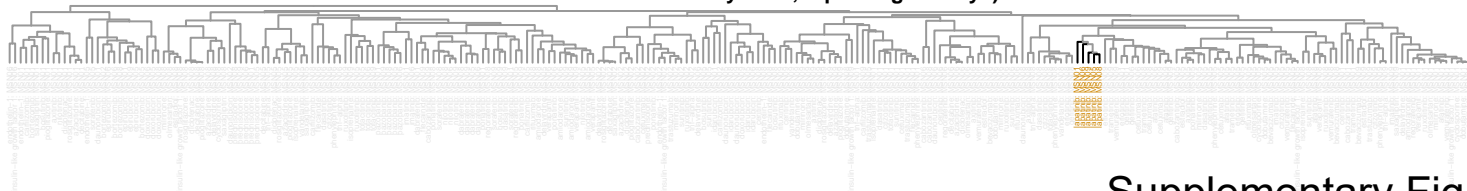

**nilotinib after removal of 1st eigenarray , F1: 0.75 , Precision: 1 , Recall: 0.6**

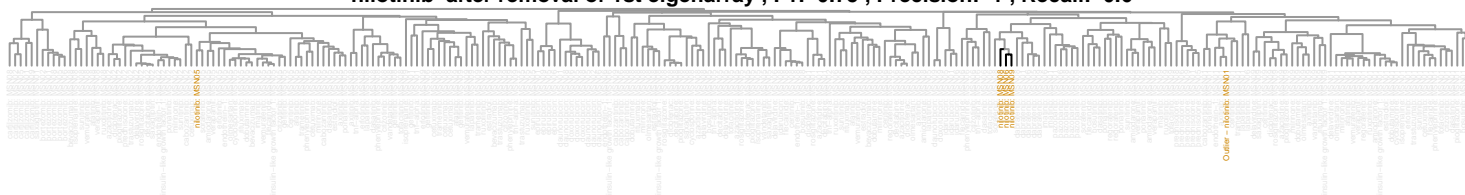

**nilotinib in decomposed data (F1 score weight: 0.65 , F1: 0.89, Precision: 1, Recall: 0.8, mediane cosine similarity: 0.77, top 21 eigenarrays)**

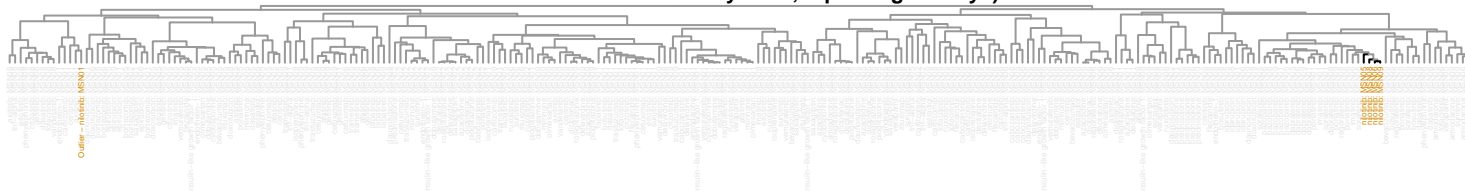

**pazopanib after removal of 1st eigenarray , F1: 1 , Precision: 1 , Recall: 1**

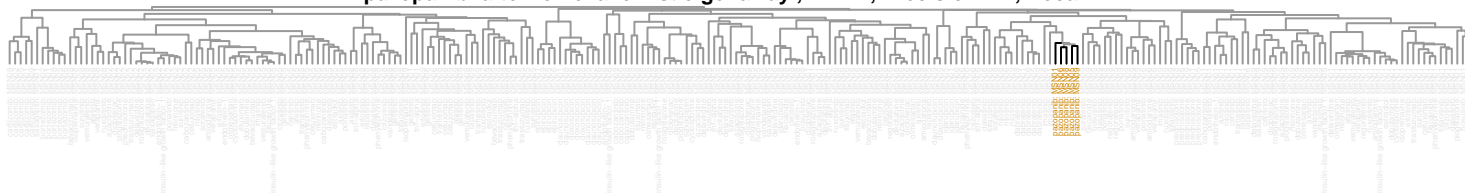

**pazopanib in decomposed data (F1 score weight: 0.95 , F1: 1, Precision: 1, Recall: 1, mediane cosine similarity: 1, top 266 eigenarrays)**

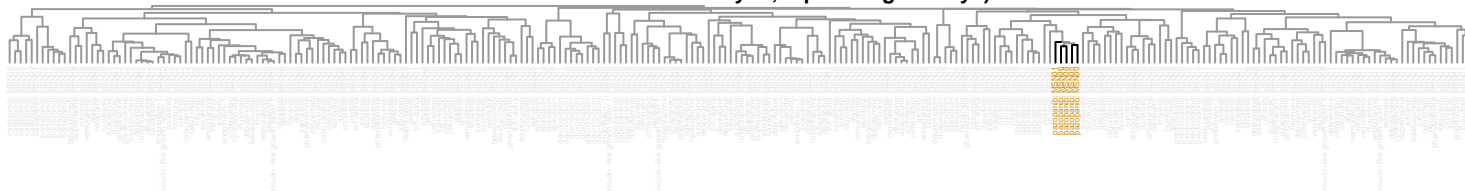

**ponatinib after removal of 1st eigenarray , F1: 0.4 , Precision: 0.5 , Recall: 0.33**

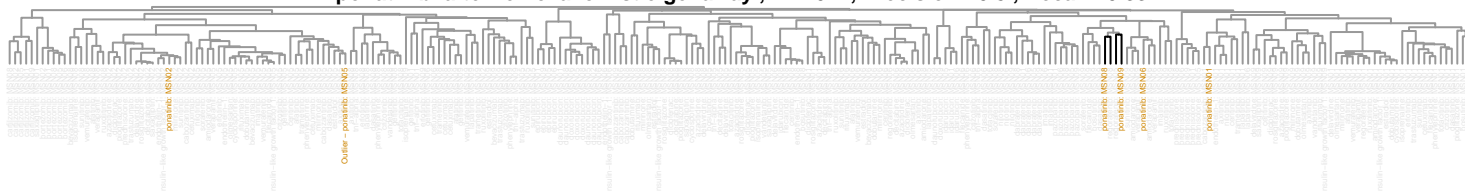

**ponatinib in decomposed data (F1 score weight: 0.7 , F1: 0.91, Precision: 1, Recall: 0.83, mediane cosine similarity: 0.4, top 15 eigenarrays)**

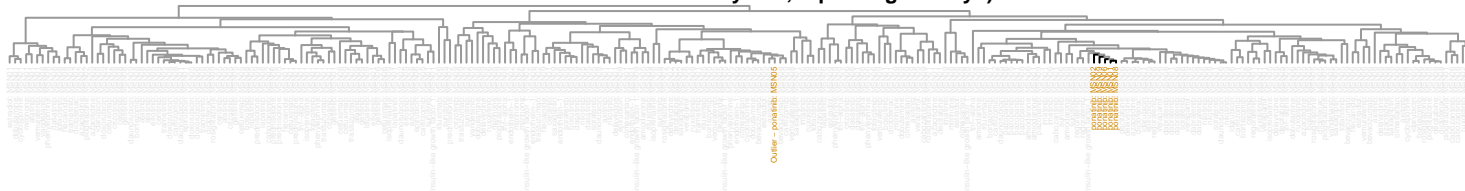

**regorafenib after removal of 1st eigenarray , F1: 0.5 , Precision: 0.5 , Recall: 0.5**

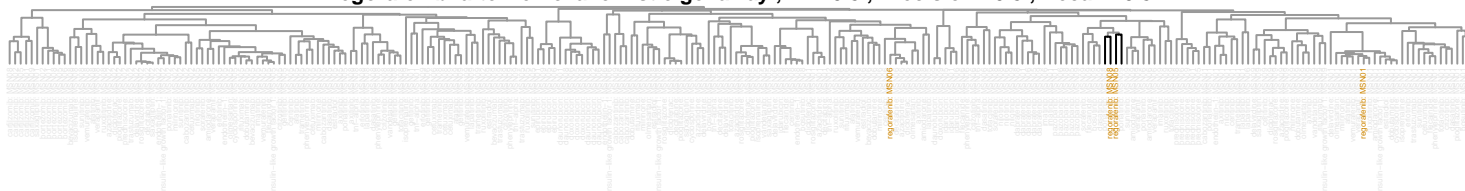

**regorafenib in decomposed data (F1 score weight: 0.95 , F1: 1, Precision: 1, Recall: 1, mediane cosine similarity: 0.33, top 16 eigenarrays)**

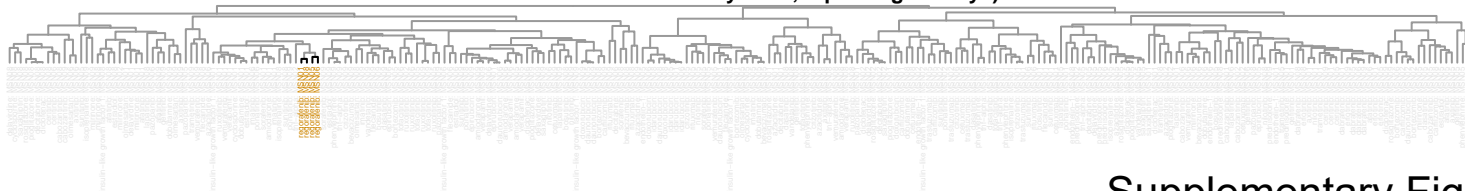

**ruxolitinib after removal of 1st eigenarray , F1: 0.25 , Precision: 0.2 , Recall: 0.33**

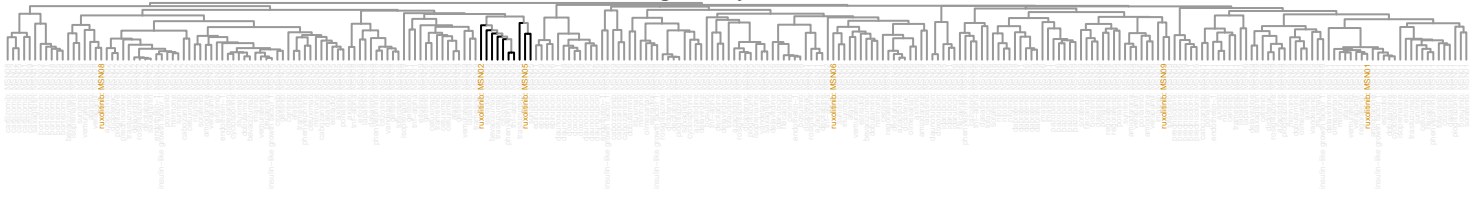

**ruxolitinib in decomposed data (F1 score weight: 0.95 , F1: 0.86, Precision: 0.75, Recall: 1, mediane cosine similarity: 0.29, top 12 eigenarrays)**

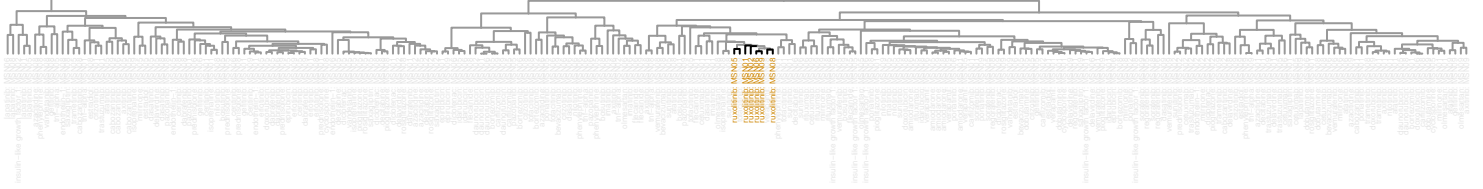

**sorafenib after removal of 1st eigenarray , F1: 0.11 , Precision: 0.06 , Recall: 0.5**

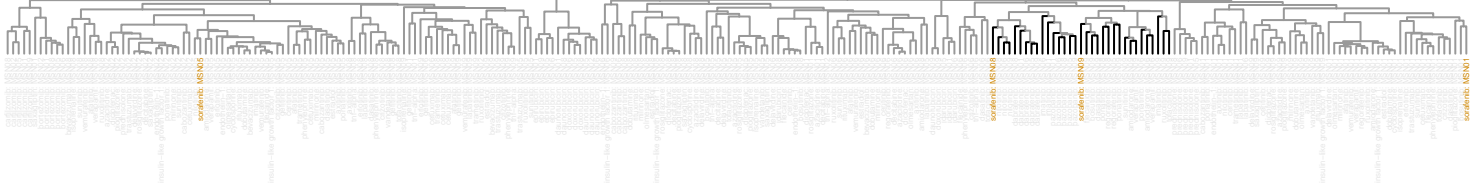

**sorafenib in decomposed data (F1 score weight: 0.95 , F1: 1, Precision: 1, Recall: 1, mediane cosine similarity: 0.52, top 19 eigenarrays)**

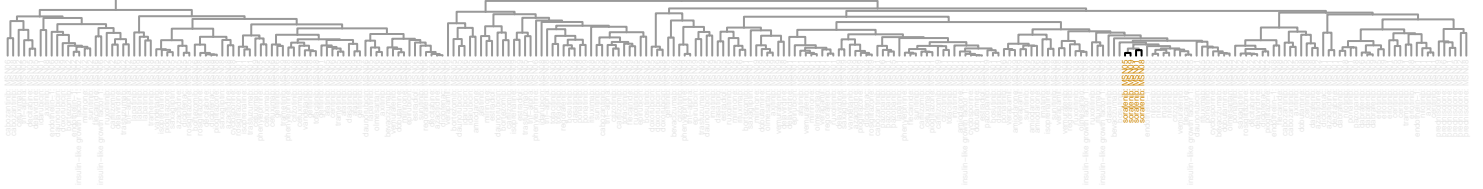

**sunitinib after removal of 1st eigenarray , F1: 0.07 , Precision: 0.04 , Recall: 0.33**

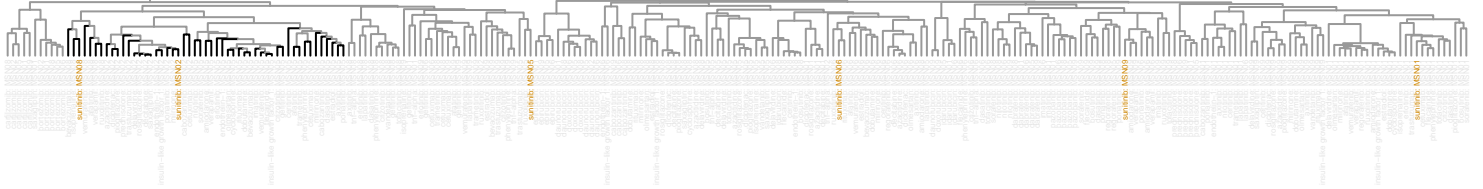

**sunitinib in decomposed data (F1 score weight: 0.95 , F1: 1, Precision: 1, Recall: 1, mediane cosine similarity: 0.2, top 14 eigenarrays)**

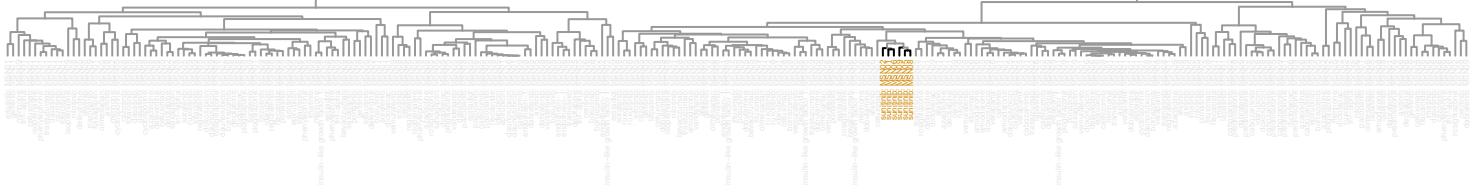

**tofacitinib after removal of 1st eigenarray , F1: 0.09 , Precision: 0.05 , Recall: 0.4**

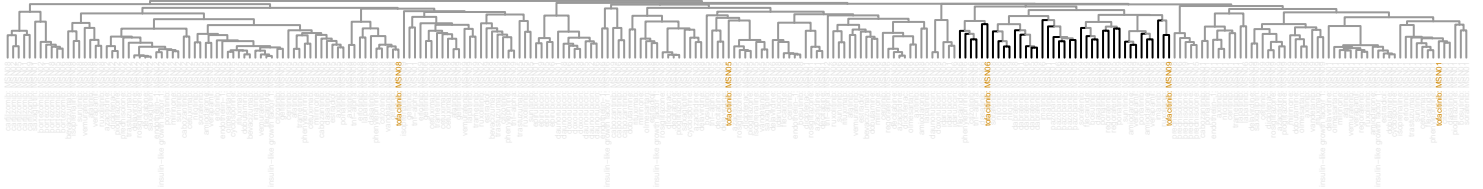

**tofacitinib in decomposed data (F1 score weight: 0.95 , F1: 1, Precision: 1, Recall: 1, mediane cosine similarity: 0.37, top 12 eigenarrays)**

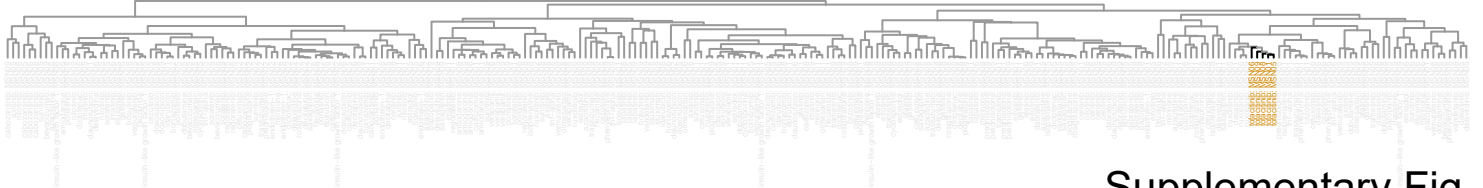

**trametinib after removal of 1st eigenarray , F1: 0.29 , Precision: 0.2 , Recall: 0.5**

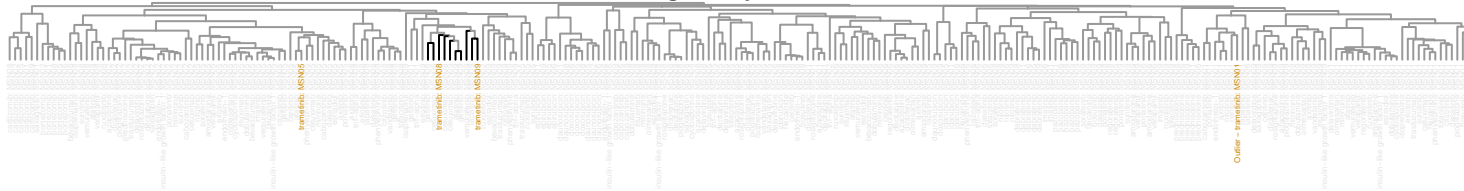

**trametinib in decomposed data (F1 score weight: 0.35 , F1: 0.86, Precision: 1, Recall: 0.75, mediane cosine similarity: 0.79, top 31 eigenarrays)**

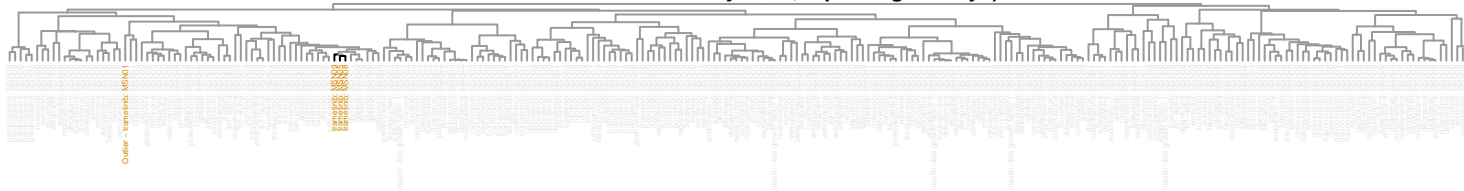

**vandetanib after removal of 1st eigenarray , F1: 0.02 , Precision: 0.01 , Recall: 0.67**

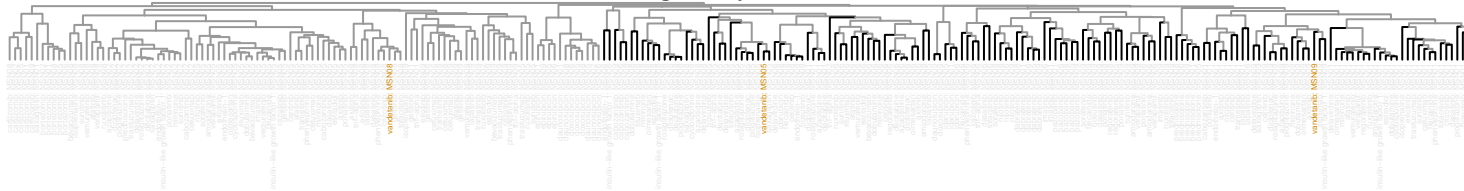

**vandetanib in decomposed data (F1 score weight: 0.95 , F1: 1, Precision: 1, Recall: 1, mediane cosine similarity: 0.14, top 16 eigenarrays)**

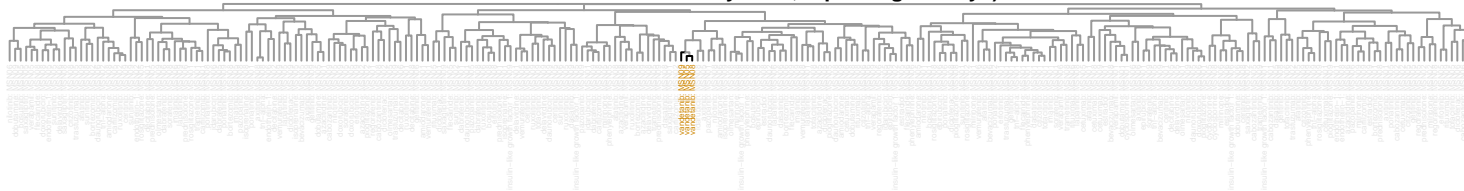

**vemurafenib after removal of 1st eigenarray , F1: 0.07 , Precision: 0.04 , Recall: 0.4**

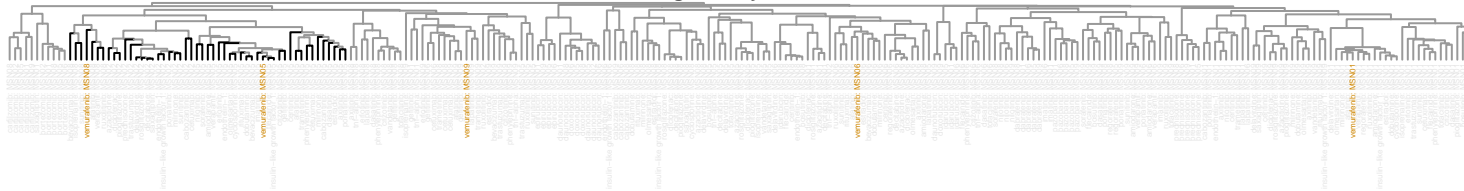

**vemurafenib in decomposed data (F1 score weight: 0.95 , F1: 1, Precision: 1, Recall: 1, mediane cosine similarity: 0.21, top 19 eigenarrays)**

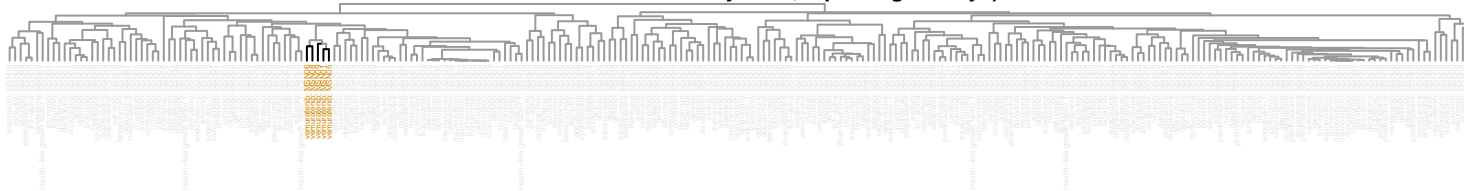

**bevacizumab after removal of 1st eigenarray , F1: 0.07 , Precision: 0.04 , Recall: 0.5**

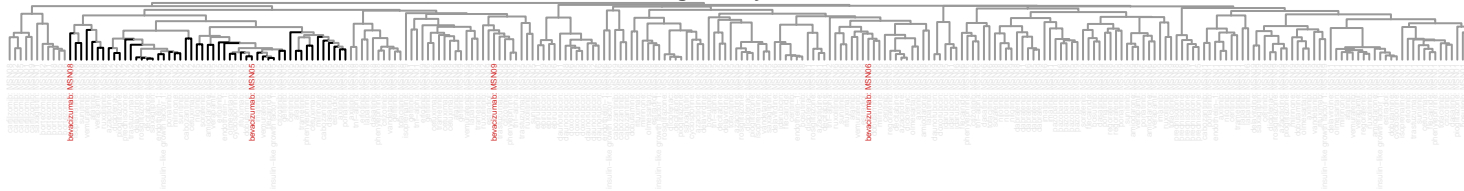

**bevacizumab in decomposed data (F1 score weight: 0.95 , F1: 1, Precision: 1, Recall: 1, mediane cosine similarity: 0.19, top 8 eigenarrays)**

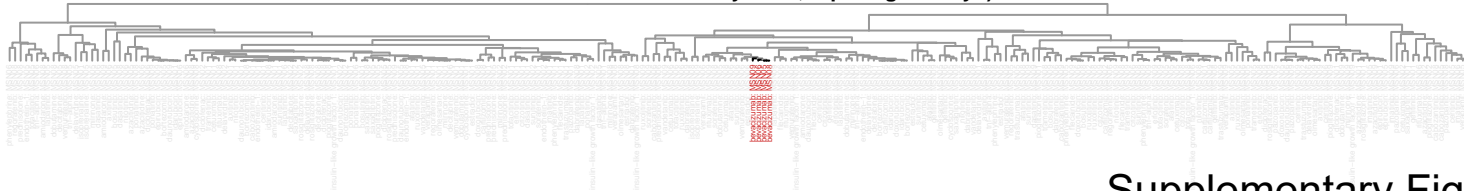

**cetuximab after removal of 1st eigenarray , F1: 0.46 , Precision: 0.43 , Recall: 0.5**

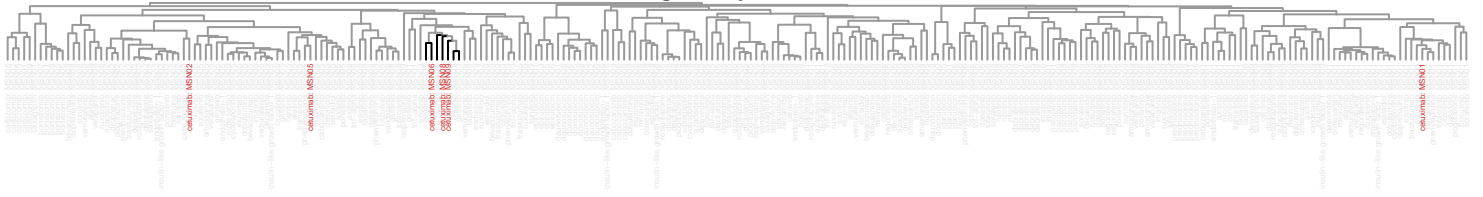

**cetuximab in decomposed data (F1 score weight: 0.95 , F1: 0.8, Precision: 1, Recall: 0.67, mediane cosine similarity: 0.43, top 23 eigenarrays)**

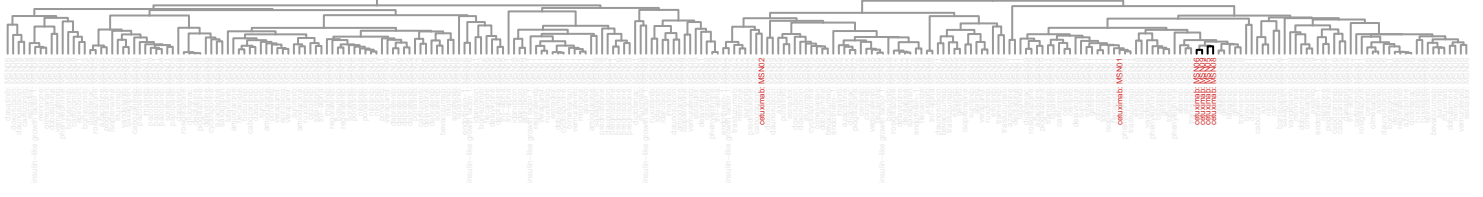

**rituximab after removal of 1st eigenarray , F1: 0.07 , Precision: 0.04 , Recall: 0.5**

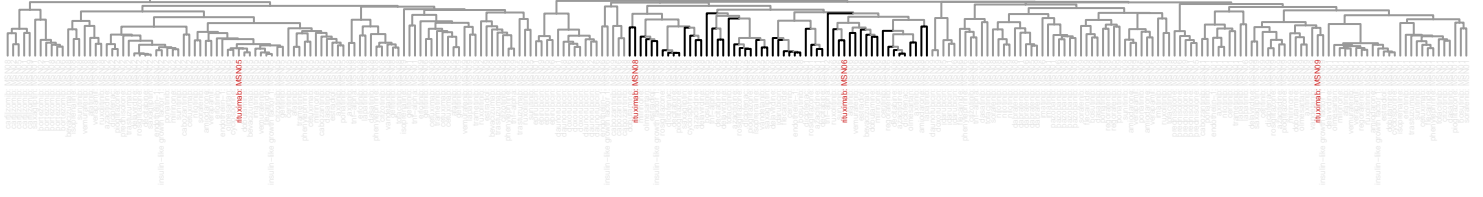

**rituximab in decomposed data (F1 score weight: 0.95 , F1: 1, Precision: 1, Recall: 1, mediane cosine similarity: 0.31, top 44 eigenarrays)**

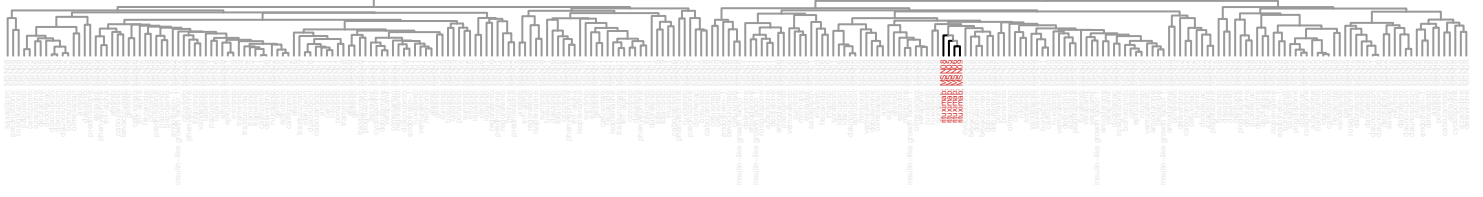

**trastuzumab after removal of 1st eigenarray , F1: 0.29 , Precision: 0.2 , Recall: 0.5**

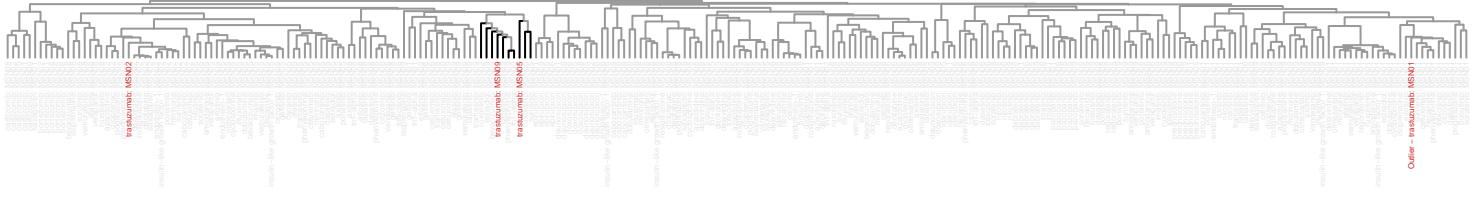

**trastuzumab in decomposed data (F1 score weight: 0.65 , F1: 0.86, Precision: 1, Recall: 0.75, mediane cosine similarity: 0.41, top 29 eigenarrays)**

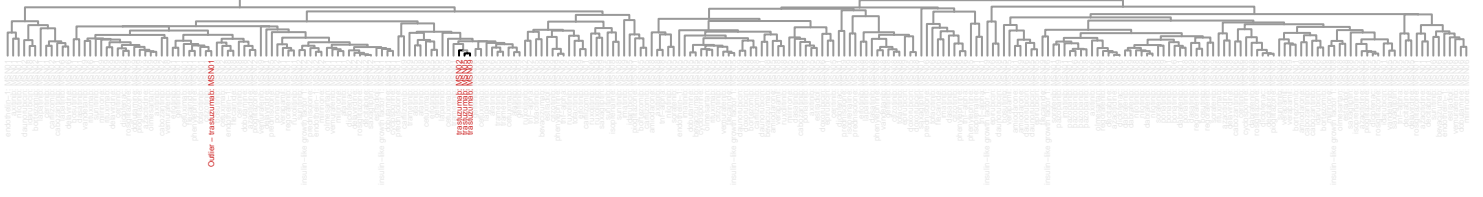

**daunorubicin after removal of 1st eigenarray , F1: 0.71 , Precision: 0.62 , Recall: 0.83**

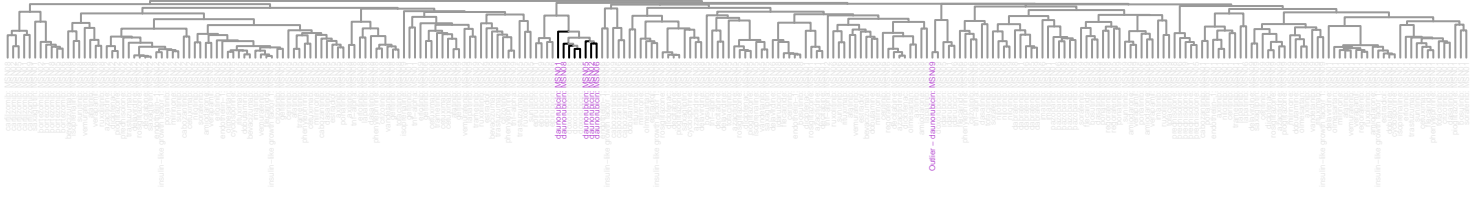

**daunorubicin in decomposed data (F1 score weight: 0 , F1: 0.71, Precision: 0.62, Recall: 0.83, mediane cosine similarity: 1, top 266 eigenarrays)**

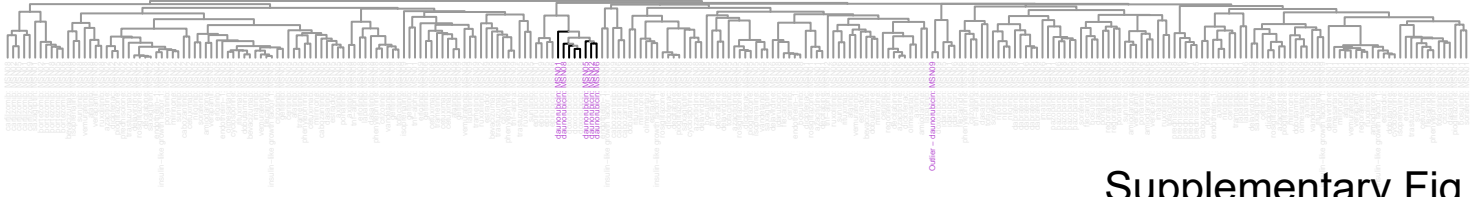

**doxorubicin after removal of 1st eigenarray , F1: 0.86 , Precision: 1 , Recall: 0.75**

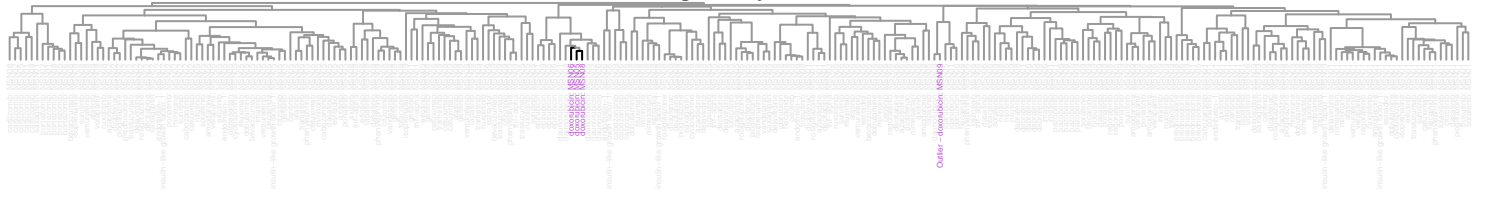

**doxorubicin in decomposed data (F1 score weight: 0 , F1: 0.86, Precision: 1, Recall: 0.75, mediane cosine similarity: 1, top 266 eigenarrays)**

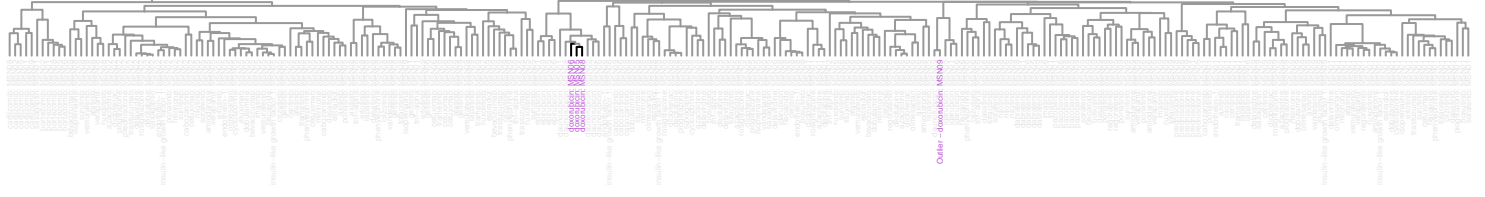

**epirubicin after removal of 1st eigenarray , F1: 1 , Precision: 1 , Recall: 1**

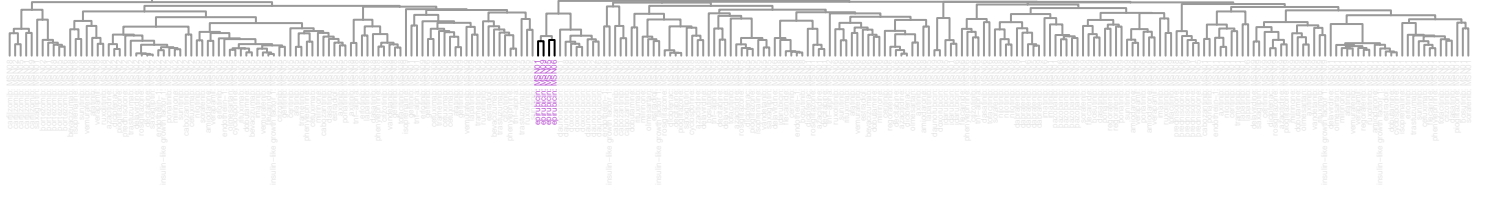

**epirubicin in decomposed data (F1 score weight: 0.95 , F1: 1, Precision: 1, Recall: 1, mediane cosine similarity: 1, top 266 eigenarrays)**

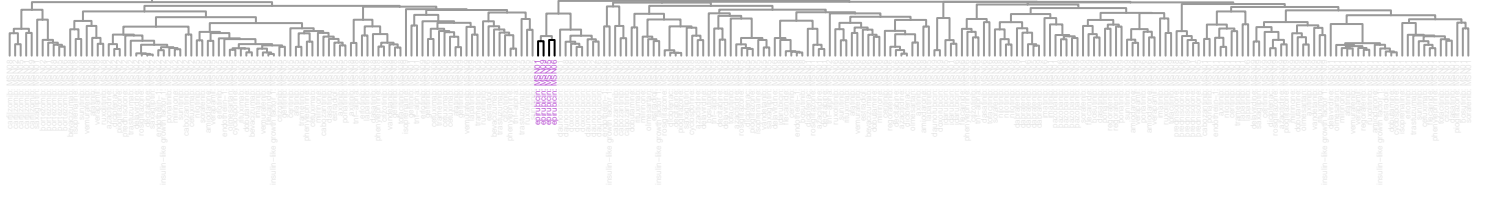

**idarubicin after removal of 1st eigenarray , F1: 0.86 , Precision: 1 , Recall: 0.75**

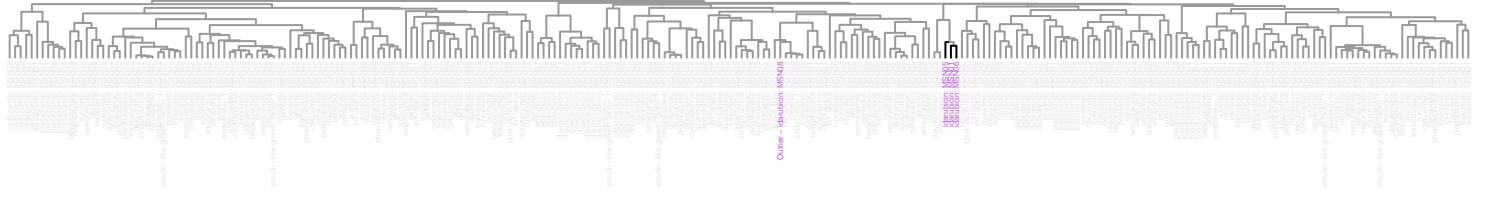

**idarubicin in decomposed data (F1 score weight: 0 , F1: 0.86, Precision: 1, Recall: 0.75, mediane cosine similarity: 1, top 266 eigenarrays)**



**amiodarone after removal of 1st eigenarray , F1: 0.36 , Precision: 0.33 , Recall: 0.4**

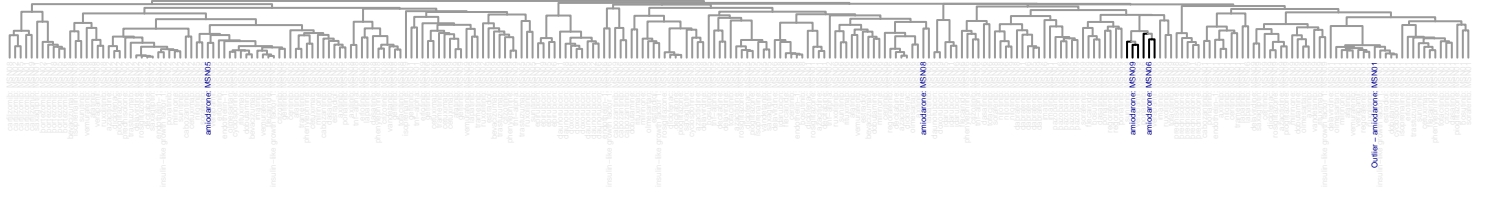

**amiodarone in decomposed data (F1 score weight: 0.5 , F1: 0.67, Precision: 0.57, Recall: 0.8, mediane cosine similarity: 0.87, top 161 eigenarrays)**

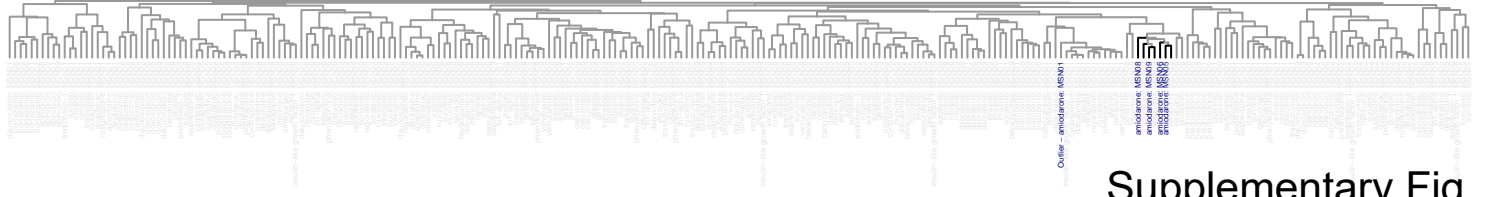

**dobutamine after removal of 1st eigenarray , F1: 0.09 , Precision: 0.05 , Recall: 0.4**

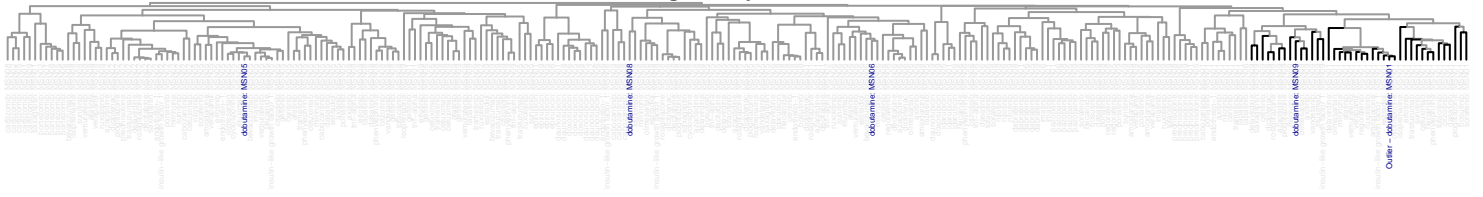

**dobutamine in decomposed data (F1 score weight: 0.55 , F1: 0.8, Precision: 0.8, Recall: 0.8, mediane cosine similarity: 0.29, top 31 eigenarrays)**

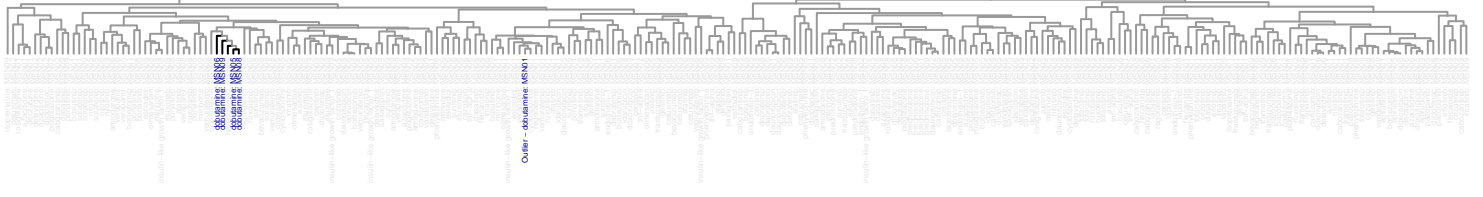

**flecainide after removal of 1st eigenarray , F1: 0.09 , Precision: 0.05 , Recall: 0.4**

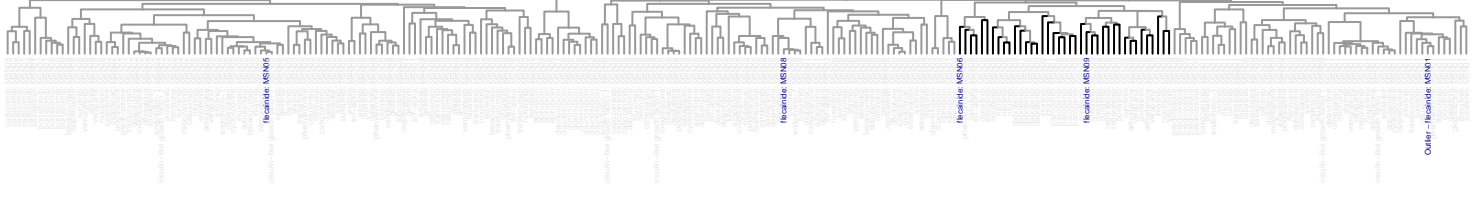

**flecainide in decomposed data (F1 score weight: 0.55 , F1: 0.89, Precision: 1, Recall: 0.8, mediane cosine similarity: 0.21, top 24 eigenarrays)**

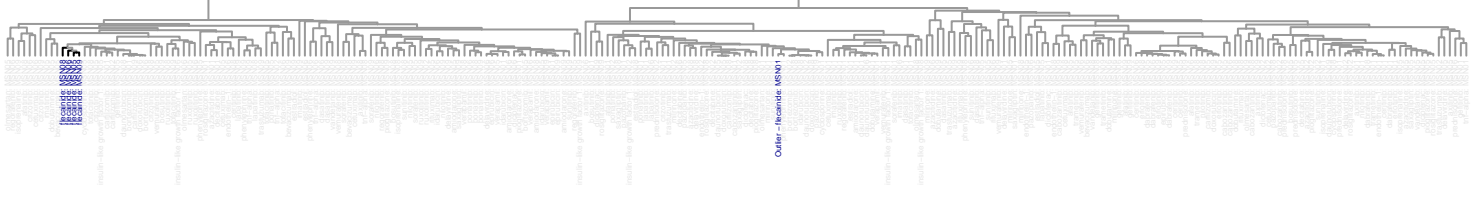

**isoprenaline after removal of 1st eigenarray , F1: 0.04 , Precision: 0.02 , Recall: 0.5**

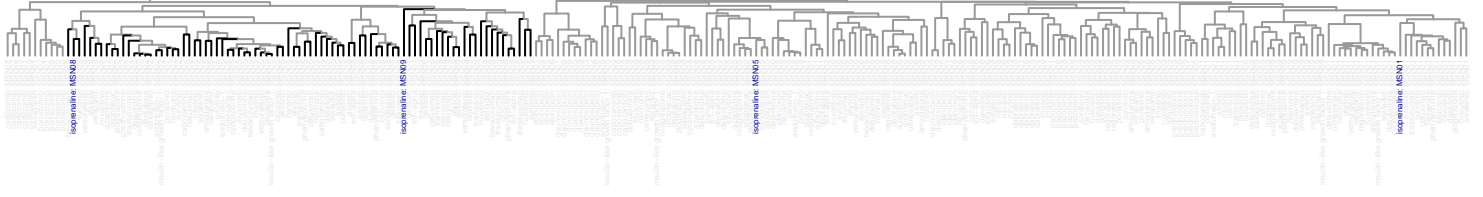

**isoprenaline in decomposed data (F1 score weight: 0.95 , F1: 1, Precision: 1, Recall: 1, mediane cosine similarity: 0.5, top 34 eigenarrays)**

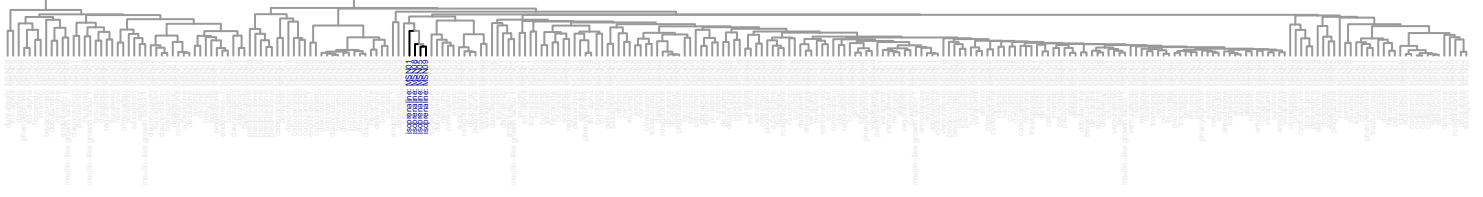

**milrinone after removal of 1st eigenarray , F1: 0.09 , Precision: 0.05 , Recall: 0.33**

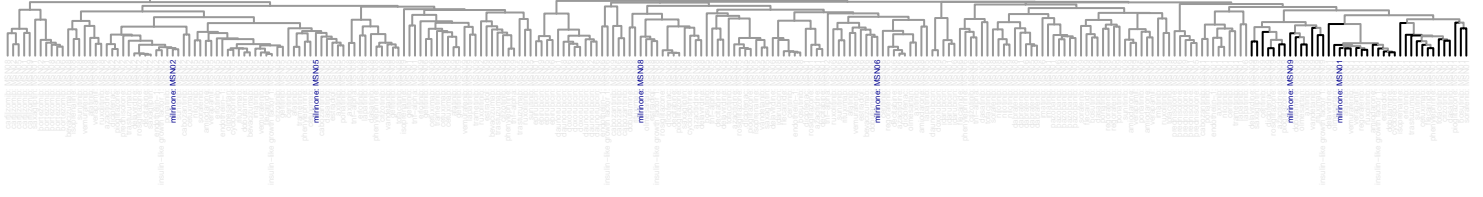

**milrinone in decomposed data (F1 score weight: 0.95 , F1: 0.67, Precision: 1, Recall: 0.5, mediane cosine similarity: 0.12, top 14 eigenarrays)**

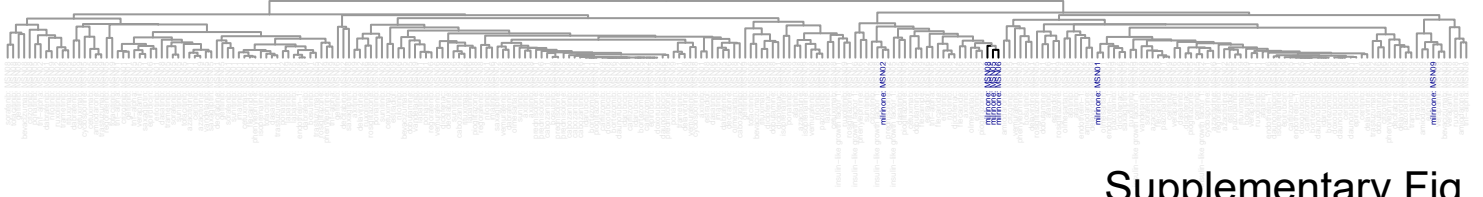

**phenylephrine after removal of 1st eigenarray , F1: 0.1 , Precision: 0.06 , Recall: 0.4**

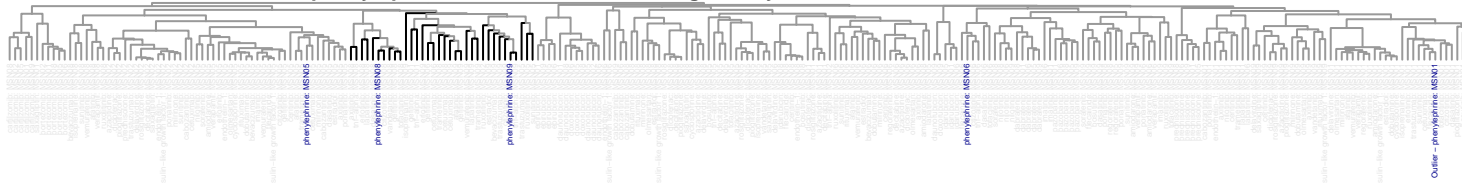

**phenylephrine in decomposed data (F1 score weight: 0.55 , F1: 0.89, Precision: 1, Recall: 0.8, mediane cosine similarity: 0.14, top 13 eigenarrays)**

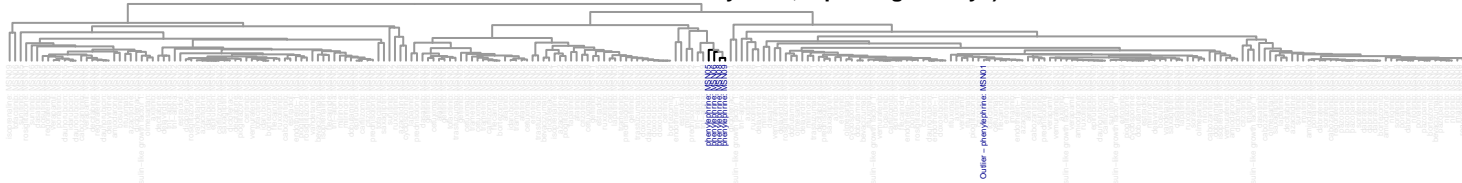

**verapamil after removal of 1st eigenarray , F1: 0.36 , Precision: 0.33 , Recall: 0.4**

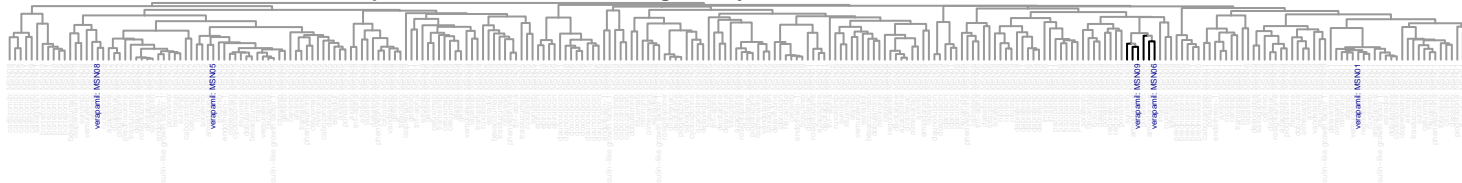

**verapamil in decomposed data (F1 score weight: 0.95 , F1: 0.55, Precision: 0.5, Recall: 0.6, mediane cosine similarity: 0.83, top 91 eigenarrays)**

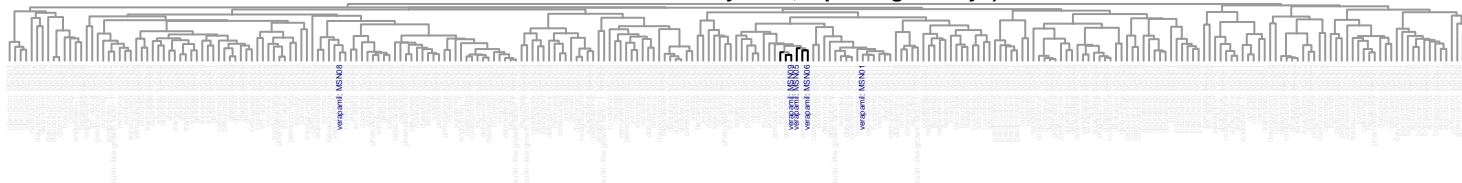

**azacitidine after removal of 1st eigenarray , F1: 0.13 , Precision: 0.07 , Recall: 0.67**

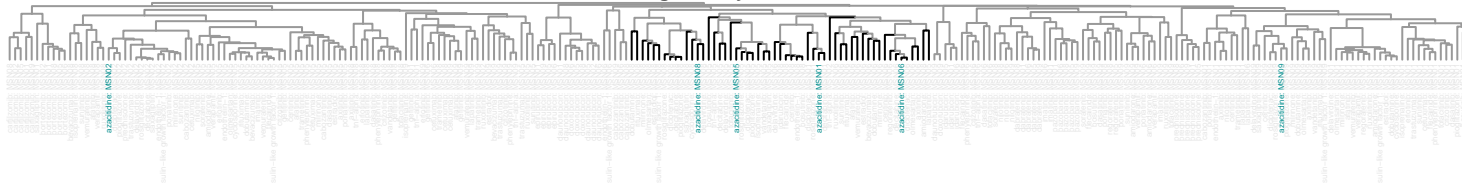

**azacitidine in decomposed data (F1 score weight: 0.95 , F1: 0.8, Precision: 1, Recall: 0.67, mediane cosine similarity: 0.29, top 15 eigenarrays)**

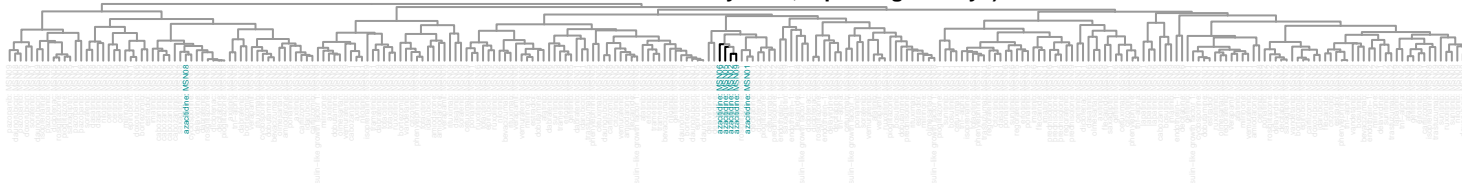

**bortezomib after removal of 1st eigenarray , F1: 1 , Precision: 1 , Recall: 1**

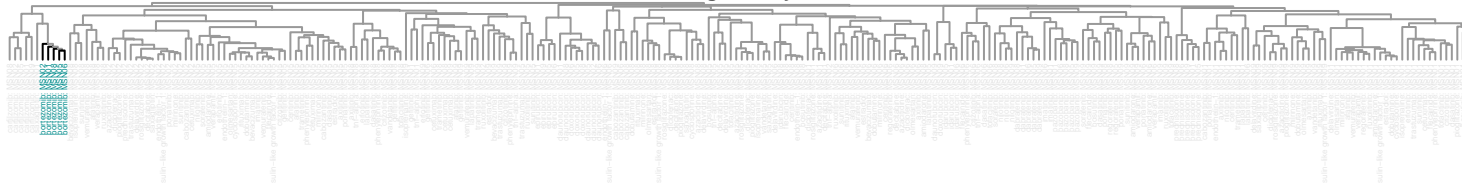

**bortezomib in decomposed data (F1 score weight: 0.95 , F1: 1, Precision: 1, Recall: 1, mediane cosine similarity: 1, top 266 eigenarrays)**

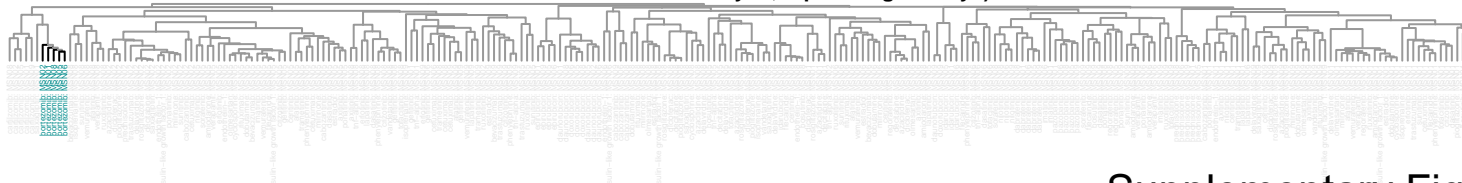



**carfilzomib after removal of 1st eigenarray , F1: 1 , Precision: 1 , Recall: 1**

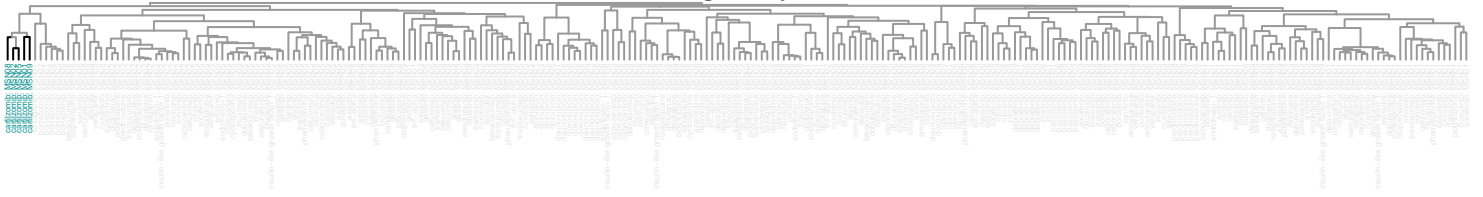

**carfilzomib in decomposed data (F1 score weight: 0.95 , F1: 1, Precision: 1, Recall: 1, mediane cosine similarity: 1, top 266 eigenarrays)**

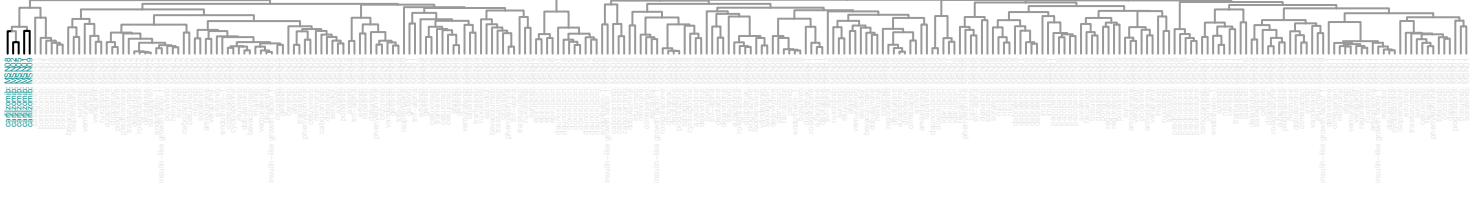

**cyclosporine after removal of 1st eigenarray , F1: 0.02 , Precision: 0.01 , Recall: 0.67**

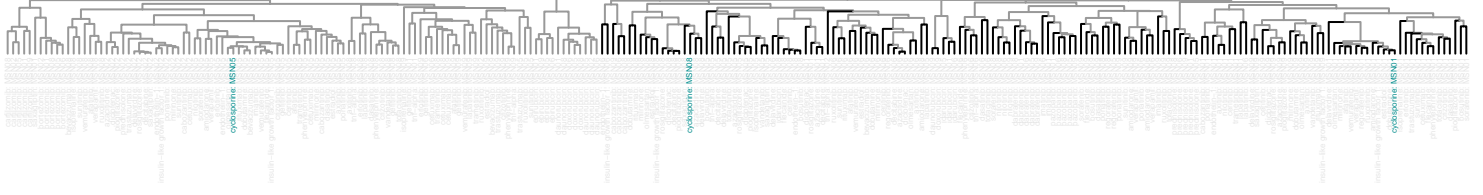

**cyclosporine in decomposed data (F1 score weight: 0.95 , F1: 1, Precision: 1, Recall: 1, mediane cosine similarity: 0.22, top 34 eigenarrays)**

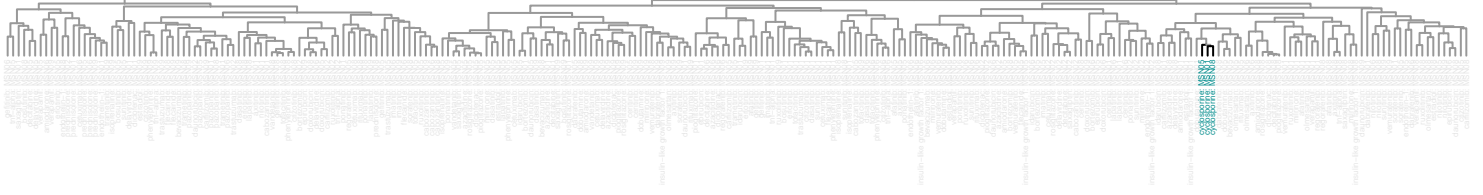

**decitabine after removal of 1st eigenarray , F1: 0.13 , Precision: 0.07 , Recall: 0.8**

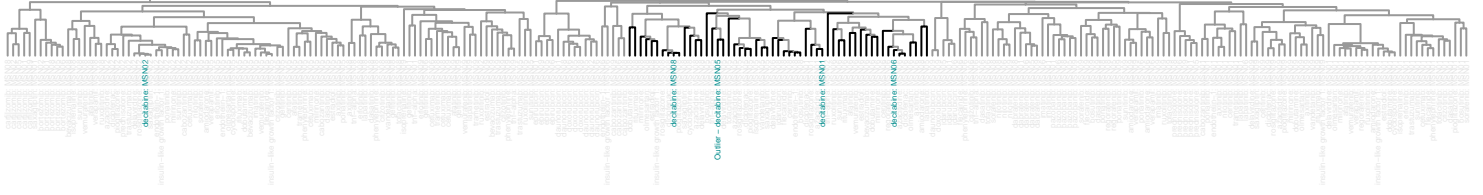

**decitabine in decomposed data (F1 score weight: 0.65 , F1: 0.8, Precision: 0.8, Recall: 0.8, mediane cosine similarity: 0.09, top 12 eigenarrays)**

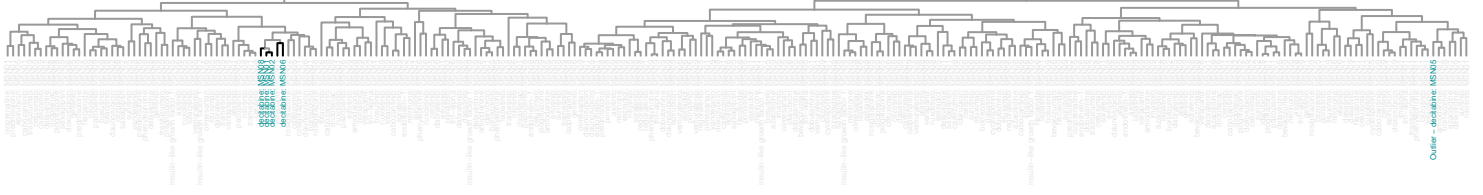

**delavirdine after removal of 1st eigenarray , F1: 0.1 , Precision: 0.05 , Recall: 0.5**

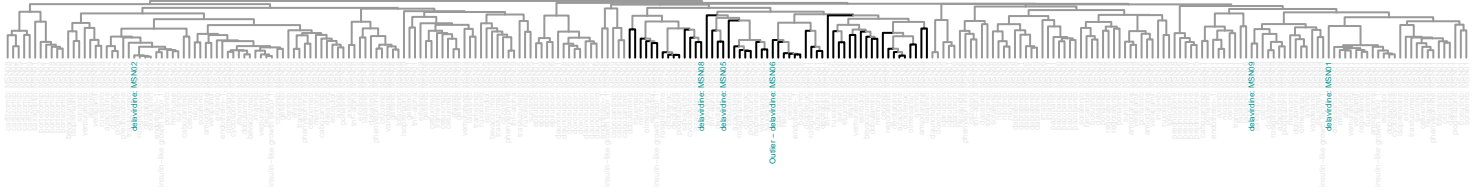

**delavirdine in decomposed data (F1 score weight: 0.55 , F1: 0.91, Precision: 1, Recall: 0.83, mediane cosine similarity: 0.13, top 14 eigenarrays)**

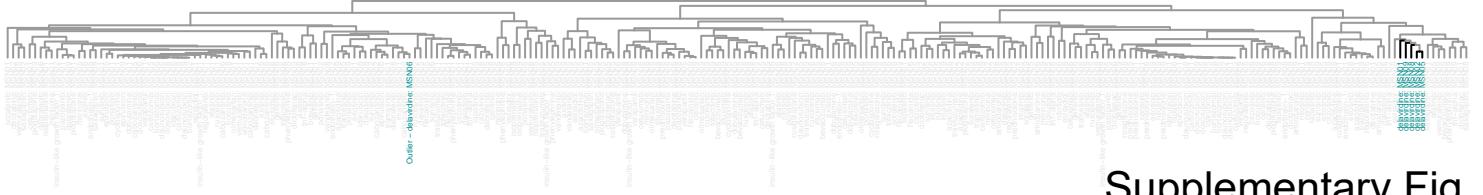

**diclofenac after removal of 1st eigenarray , F1: 0.13 , Precision: 0.07 , Recall: 0.67**

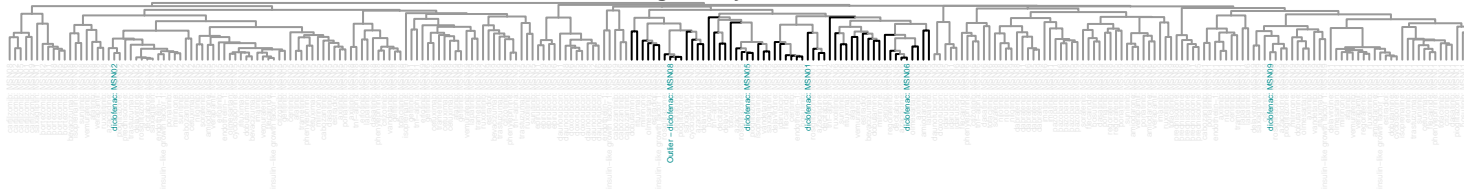

**diclofenac in decomposed data (F1 score weight: 0.65 , F1: 0.73, Precision: 0.8, Recall: 0.67, mediane cosine similarity: 0.04, top 6 eigenarrays)**

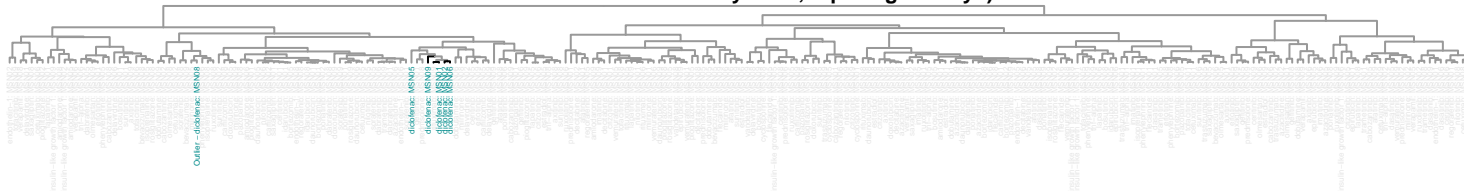

**endothelin-1 after removal of 1st eigenarray , F1: 0.08 , Precision: 0.05 , Recall: 0.4**

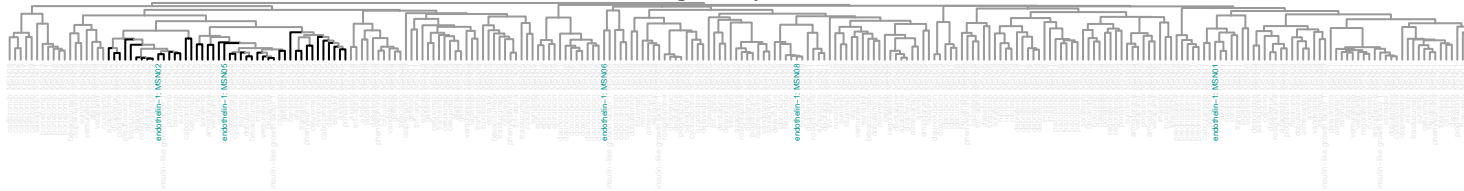

**endothelin-1 in decomposed data (F1 score weight: 0.95 , F1: 0.75, Precision: 1, Recall: 0.6, mediane cosine similarity: 0.29, top 21 eigenarrays)**

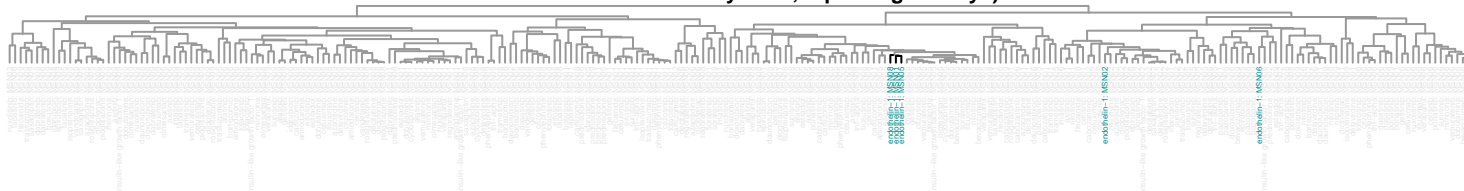

**estradiol after removal of 1st eigenarray , F1: 0.07 , Precision: 0.04 , Recall: 0.4**

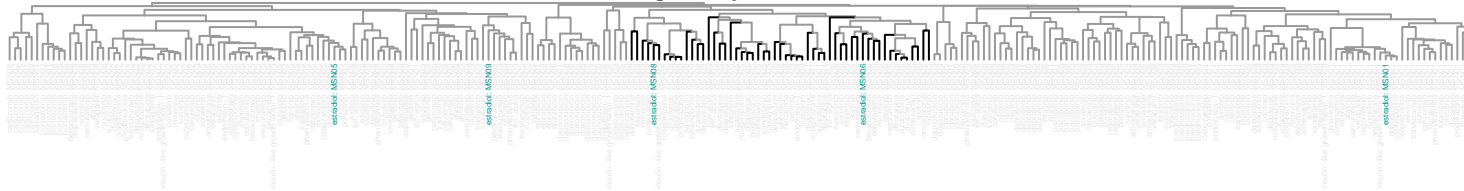

**estradiol in decomposed data (F1 score weight: 0.95 , F1: 0.75, Precision: 1, Recall: 0.6, mediane cosine similarity: 0.3, top 34 eigenarrays)**

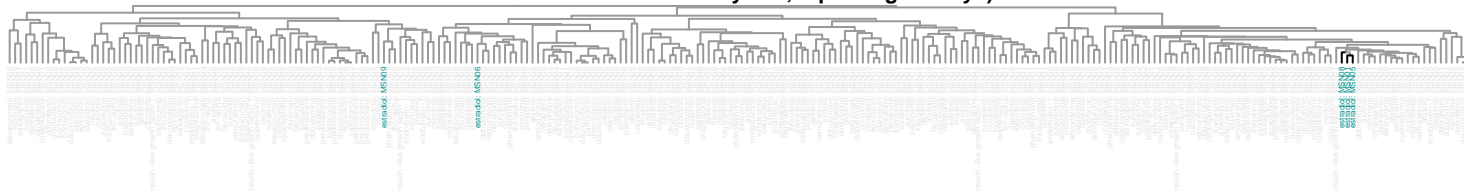

**insulin-like growth factor 1 after removal of 1st eigenarray , F1: 0.09 , Precision: 0.05 , Recall: 0.33**

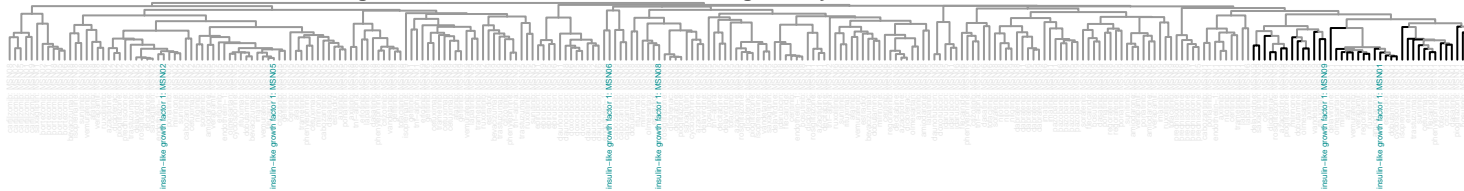

**insulin-like growth factor 1 in decomposed data (F1 score weight: 0.95 , F1: 0.67, Precision: 1, Recall: 0.5, mediane cosine similarity: 0.5, top 63 eigenarrays)**

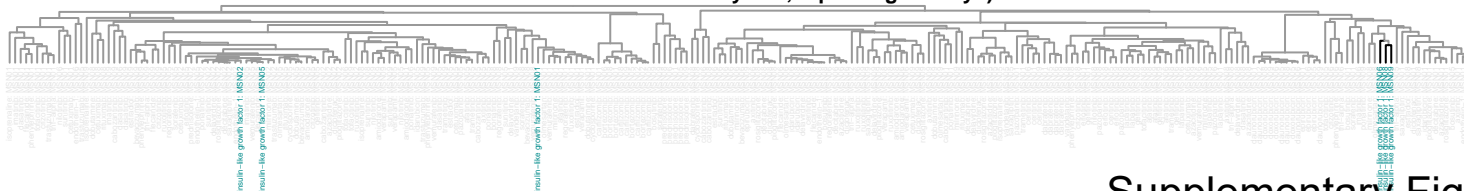

**olmesartan after removal of 1st eigenarray , F1: 0.09 , Precision: 0.05 , Recall: 0.4**

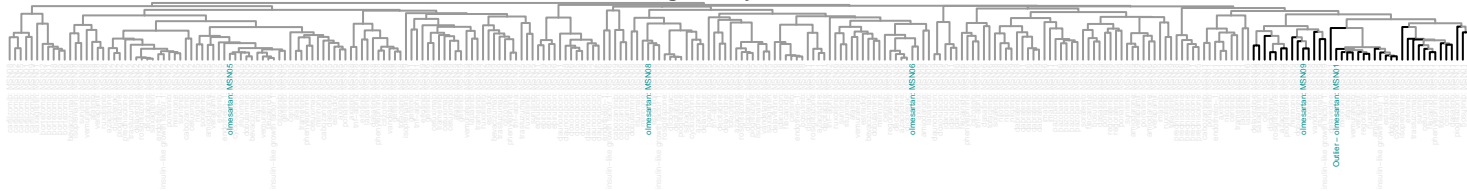

**olmesartan in decomposed data (F1 score weight: 0.55 , F1: 0.89, Precision: 1, Recall: 0.8, mediane cosine similarity: 0.15, top 17 eigenarrays)**

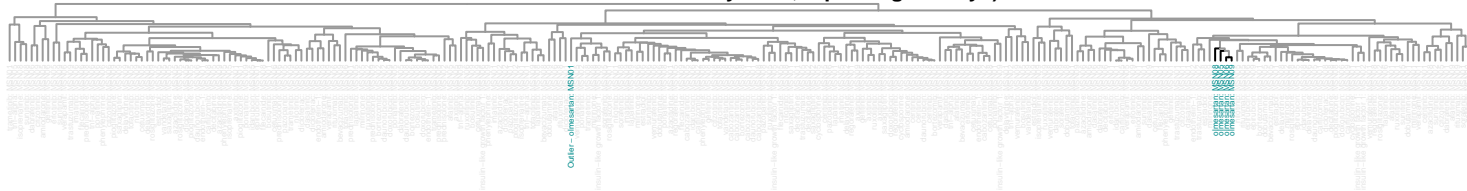

**pioglitazone after removal of 1st eigenarray , F1: 0.09 , Precision: 0.05 , Recall: 0.4**

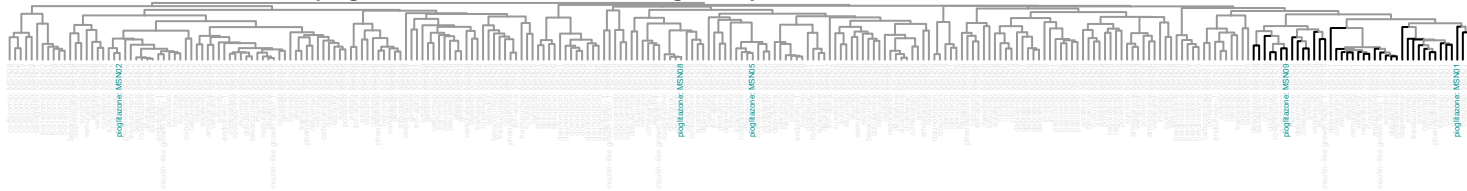

**pioglitazone in decomposed data (F1 score weight: 0.95 , F1: 0.75, Precision: 1, Recall: 0.6, mediane cosine similarity: 0.06, top 8 eigenarrays)**

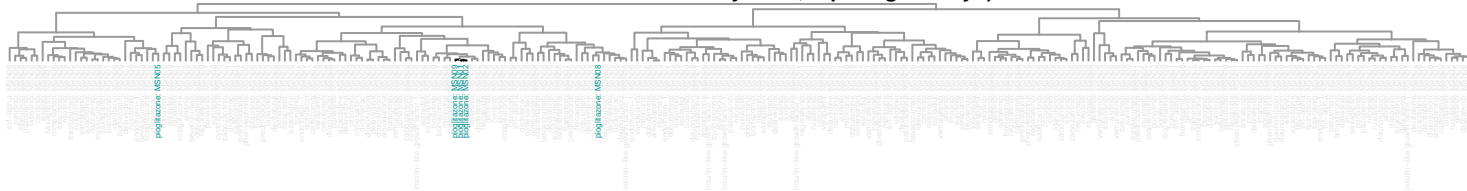

**prednisolone after removal of 1st eigenarray , F1: 0.91 , Precision: 1 , Recall: 0.83**

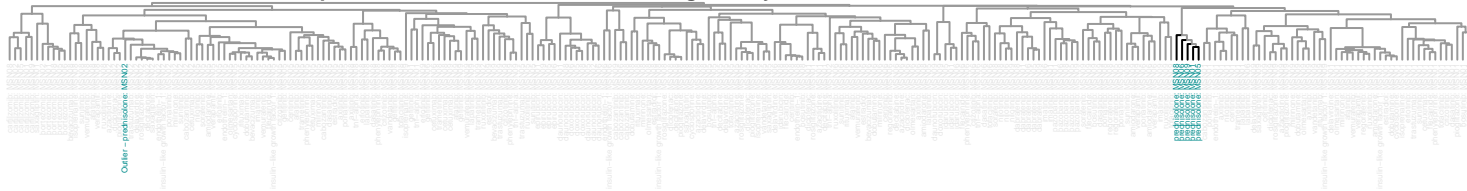

**prednisolone in decomposed data (F1 score weight: 0 , F1: 0.91, Precision: 1, Recall: 0.83, mediane cosine similarity: 1, top 266 eigenarrays)**

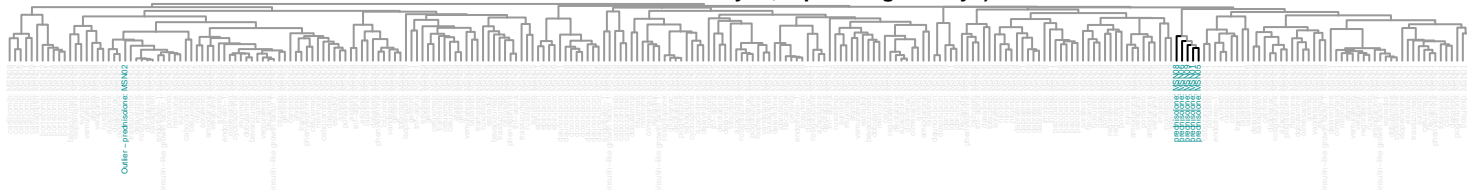

**rosiglitazone after removal of 1st eigenarray , F1: 0.1 , Precision: 0.05 , Recall: 0.6**

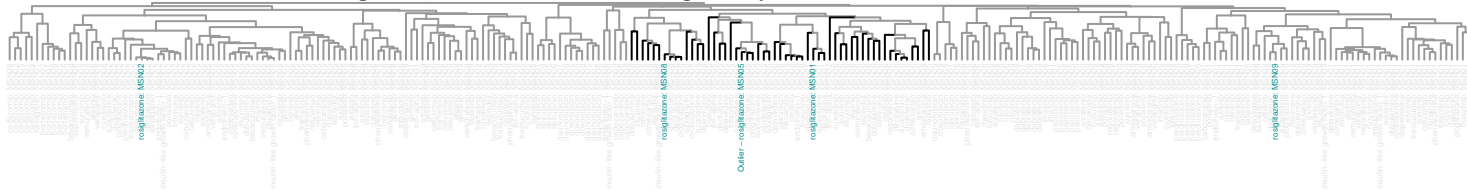

**rosiglitazone in decomposed data (F1 score weight: 0.6 , F1: 0.8, Precision: 0.8, Recall: 0.8, mediane cosine similarity: 0.16, top 17 eigenarrays)**

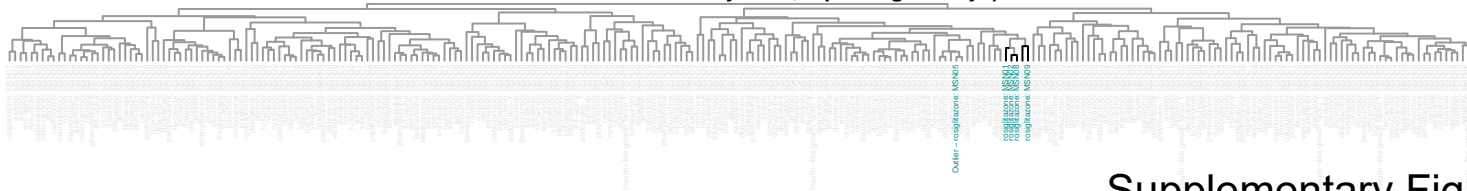

**saxagliptin after removal of 1st eigenarray , F1: 0.07 , Precision: 0.04 , Recall: 0.4**

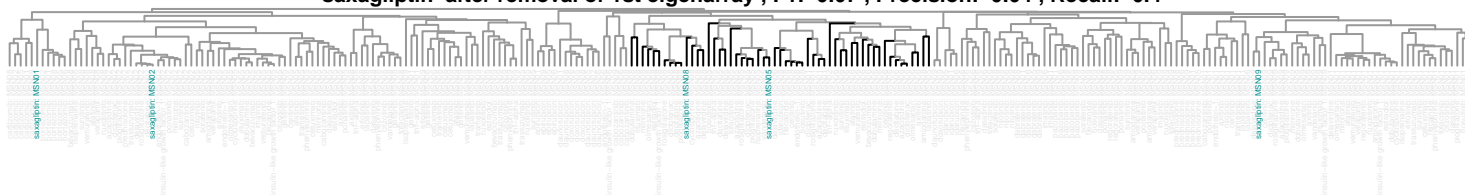

**saxagliptin in decomposed data (F1 score weight: 0.95 , F1: 0.75, Precision: 1, Recall: 0.6, median cosine similarity: 0.07, top 5 eigenarrays)**

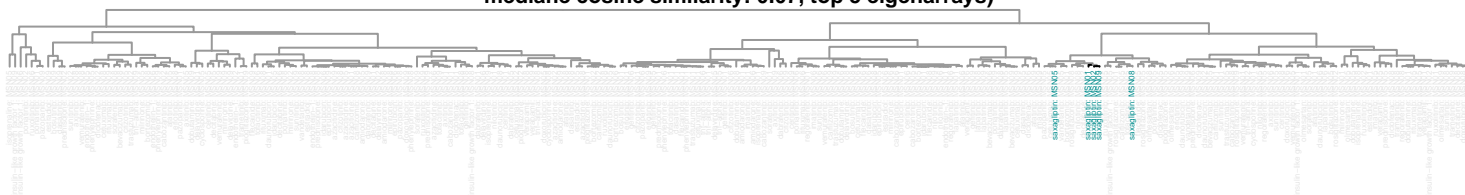

**tnf-alpha after removal of 1st eigenarray , F1: 0.15 , Precision: 0.09 , Recall: 0.5**

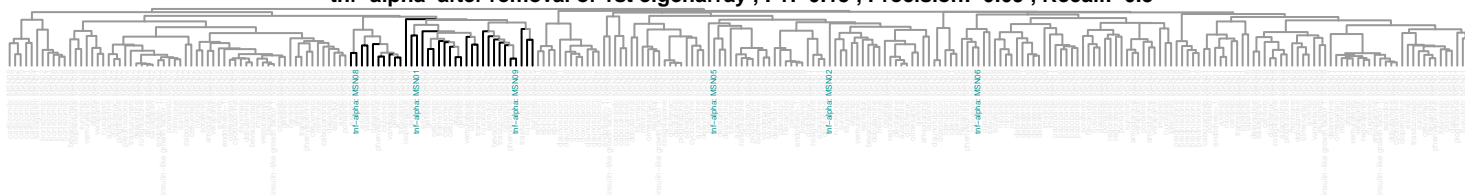

**tnf-alpha in decomposed data (F1 score weight: 0.95 , F1: 0.67, Precision: 1, Recall: 0.5, median cosine similarity: 0.32, top 17 eigenarrays)**

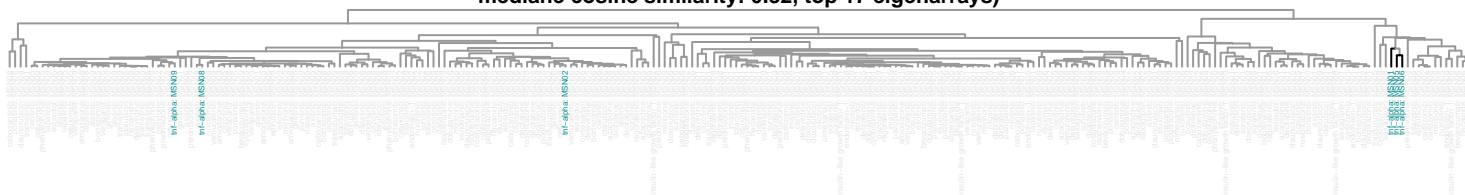

**Supplementary Figure 11.** Clustering results for each drug after removal of the first eigenarray and in the final drug-selective subspaces. Clusters with the highest F1 scores are labeled black. Small molecule kinase inhibitors, monoclonal antibodies, anthracyclines, cardiac acting and non-cardiac acting drugs are labeled orange, red, purple, blue and gray-blue. The cluster dendrogram shown in Suppl. Figure 10D is part of this figure set as well.

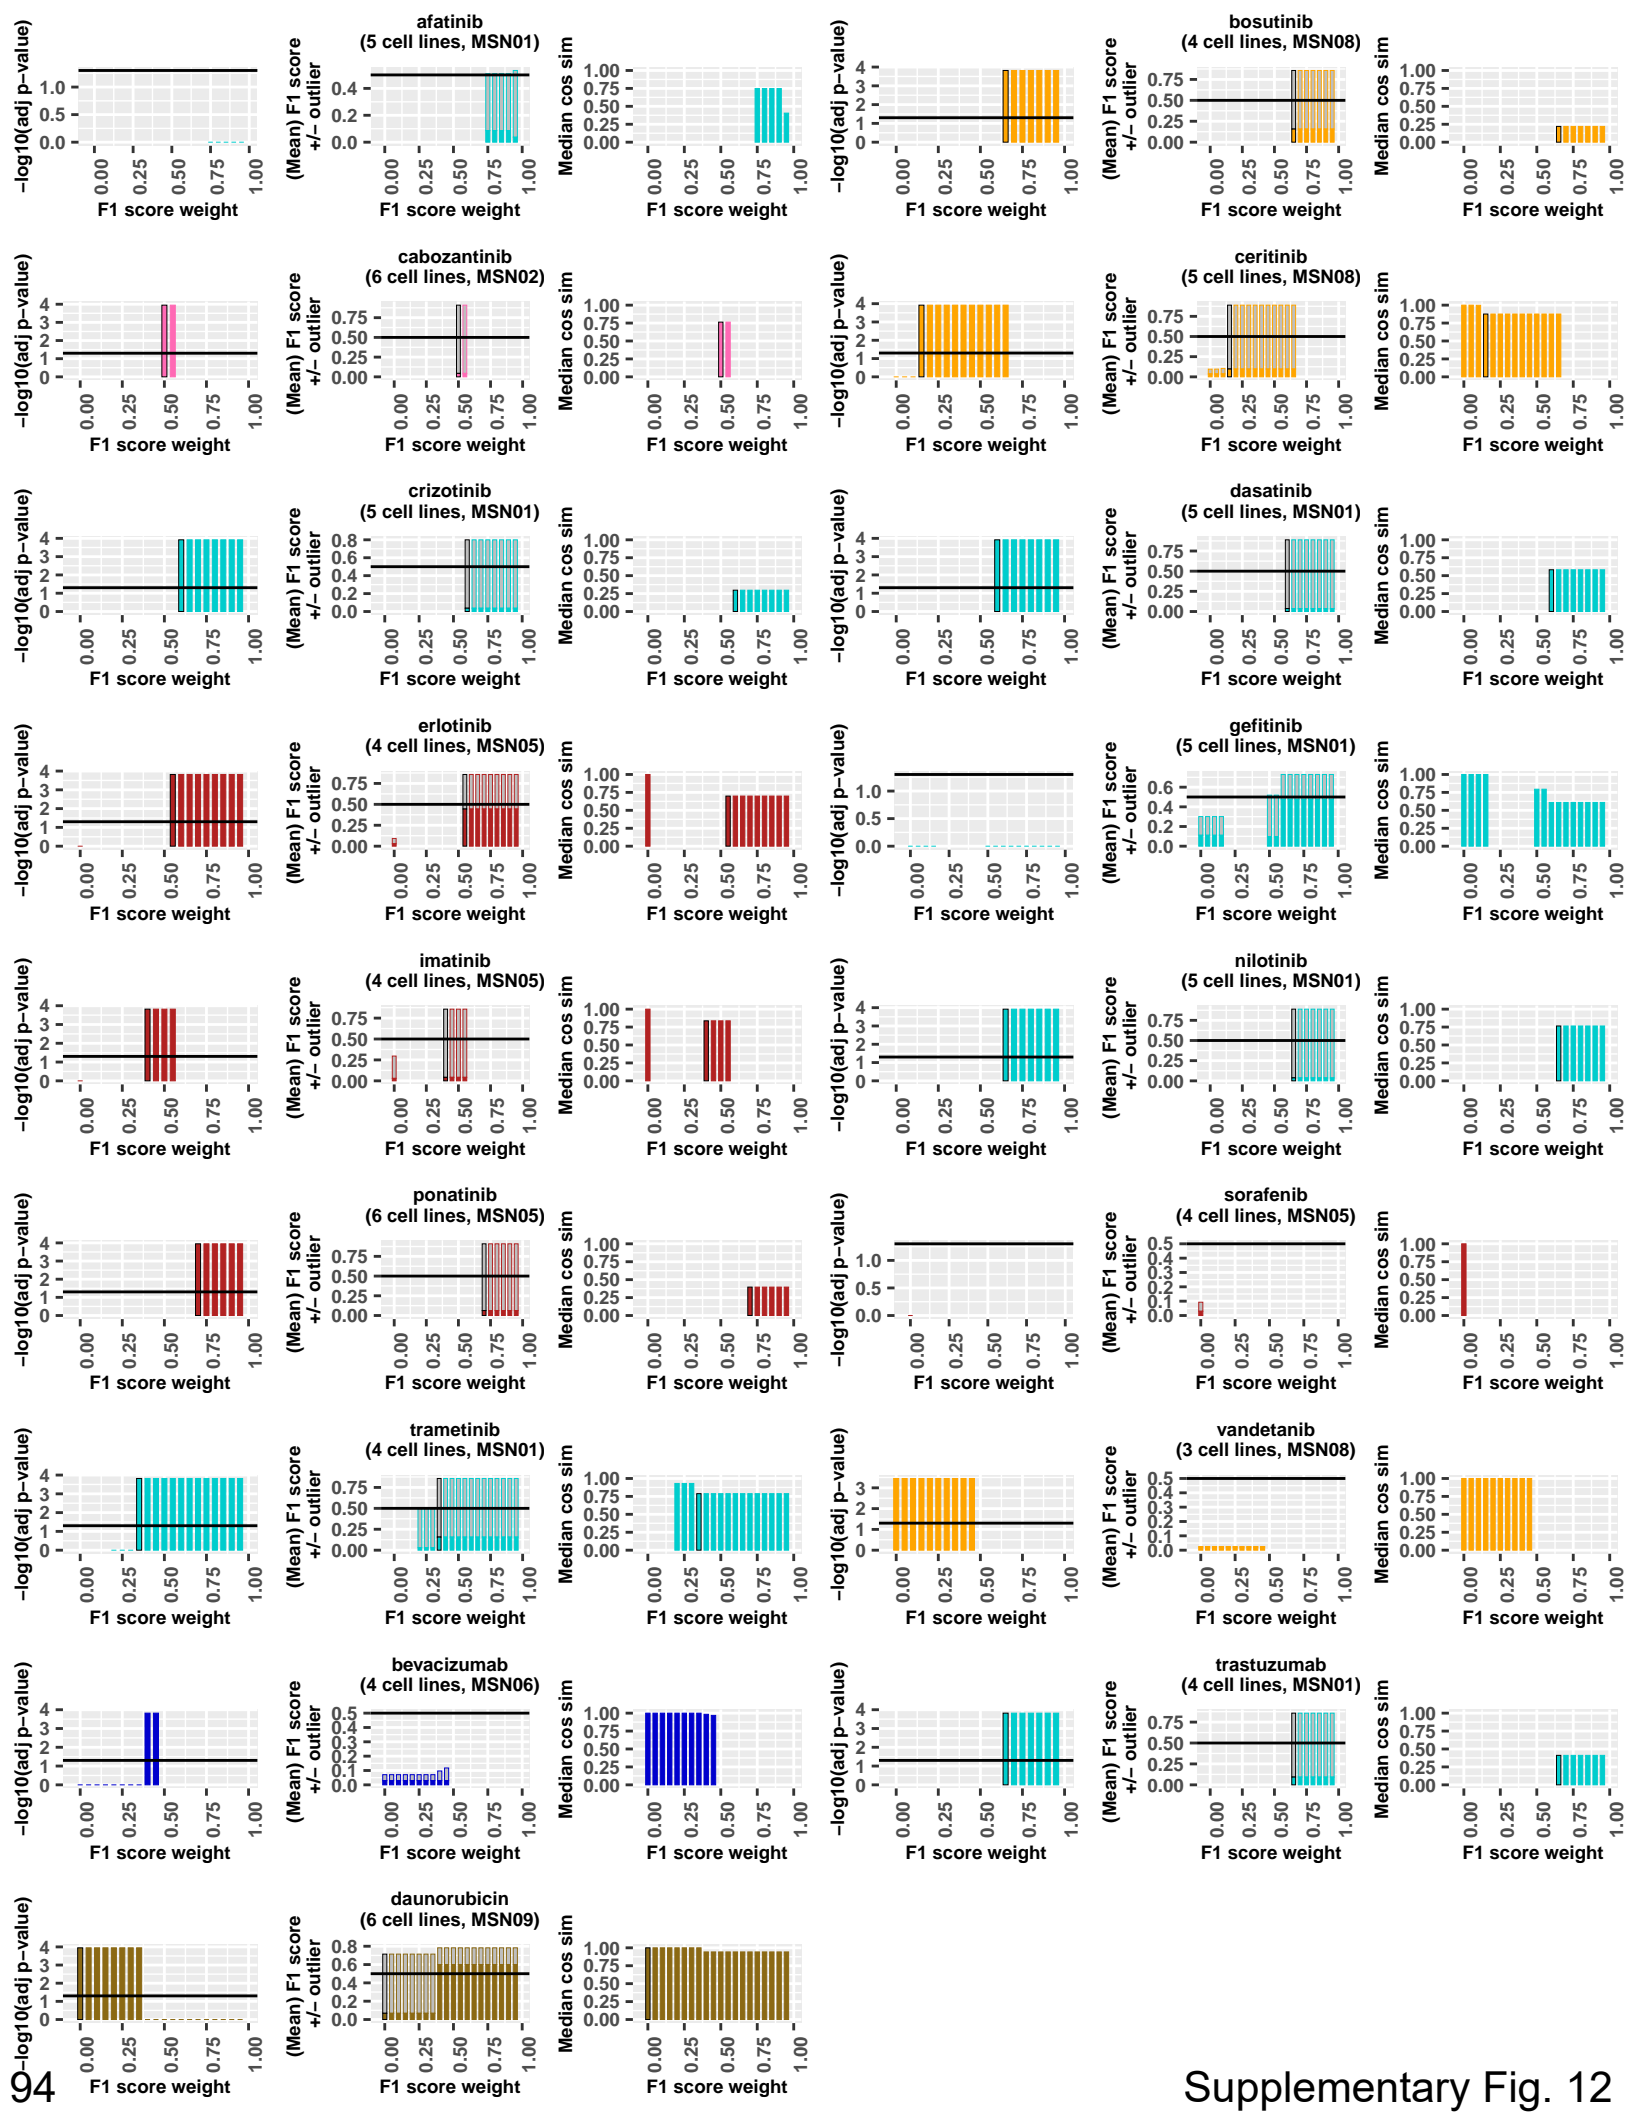

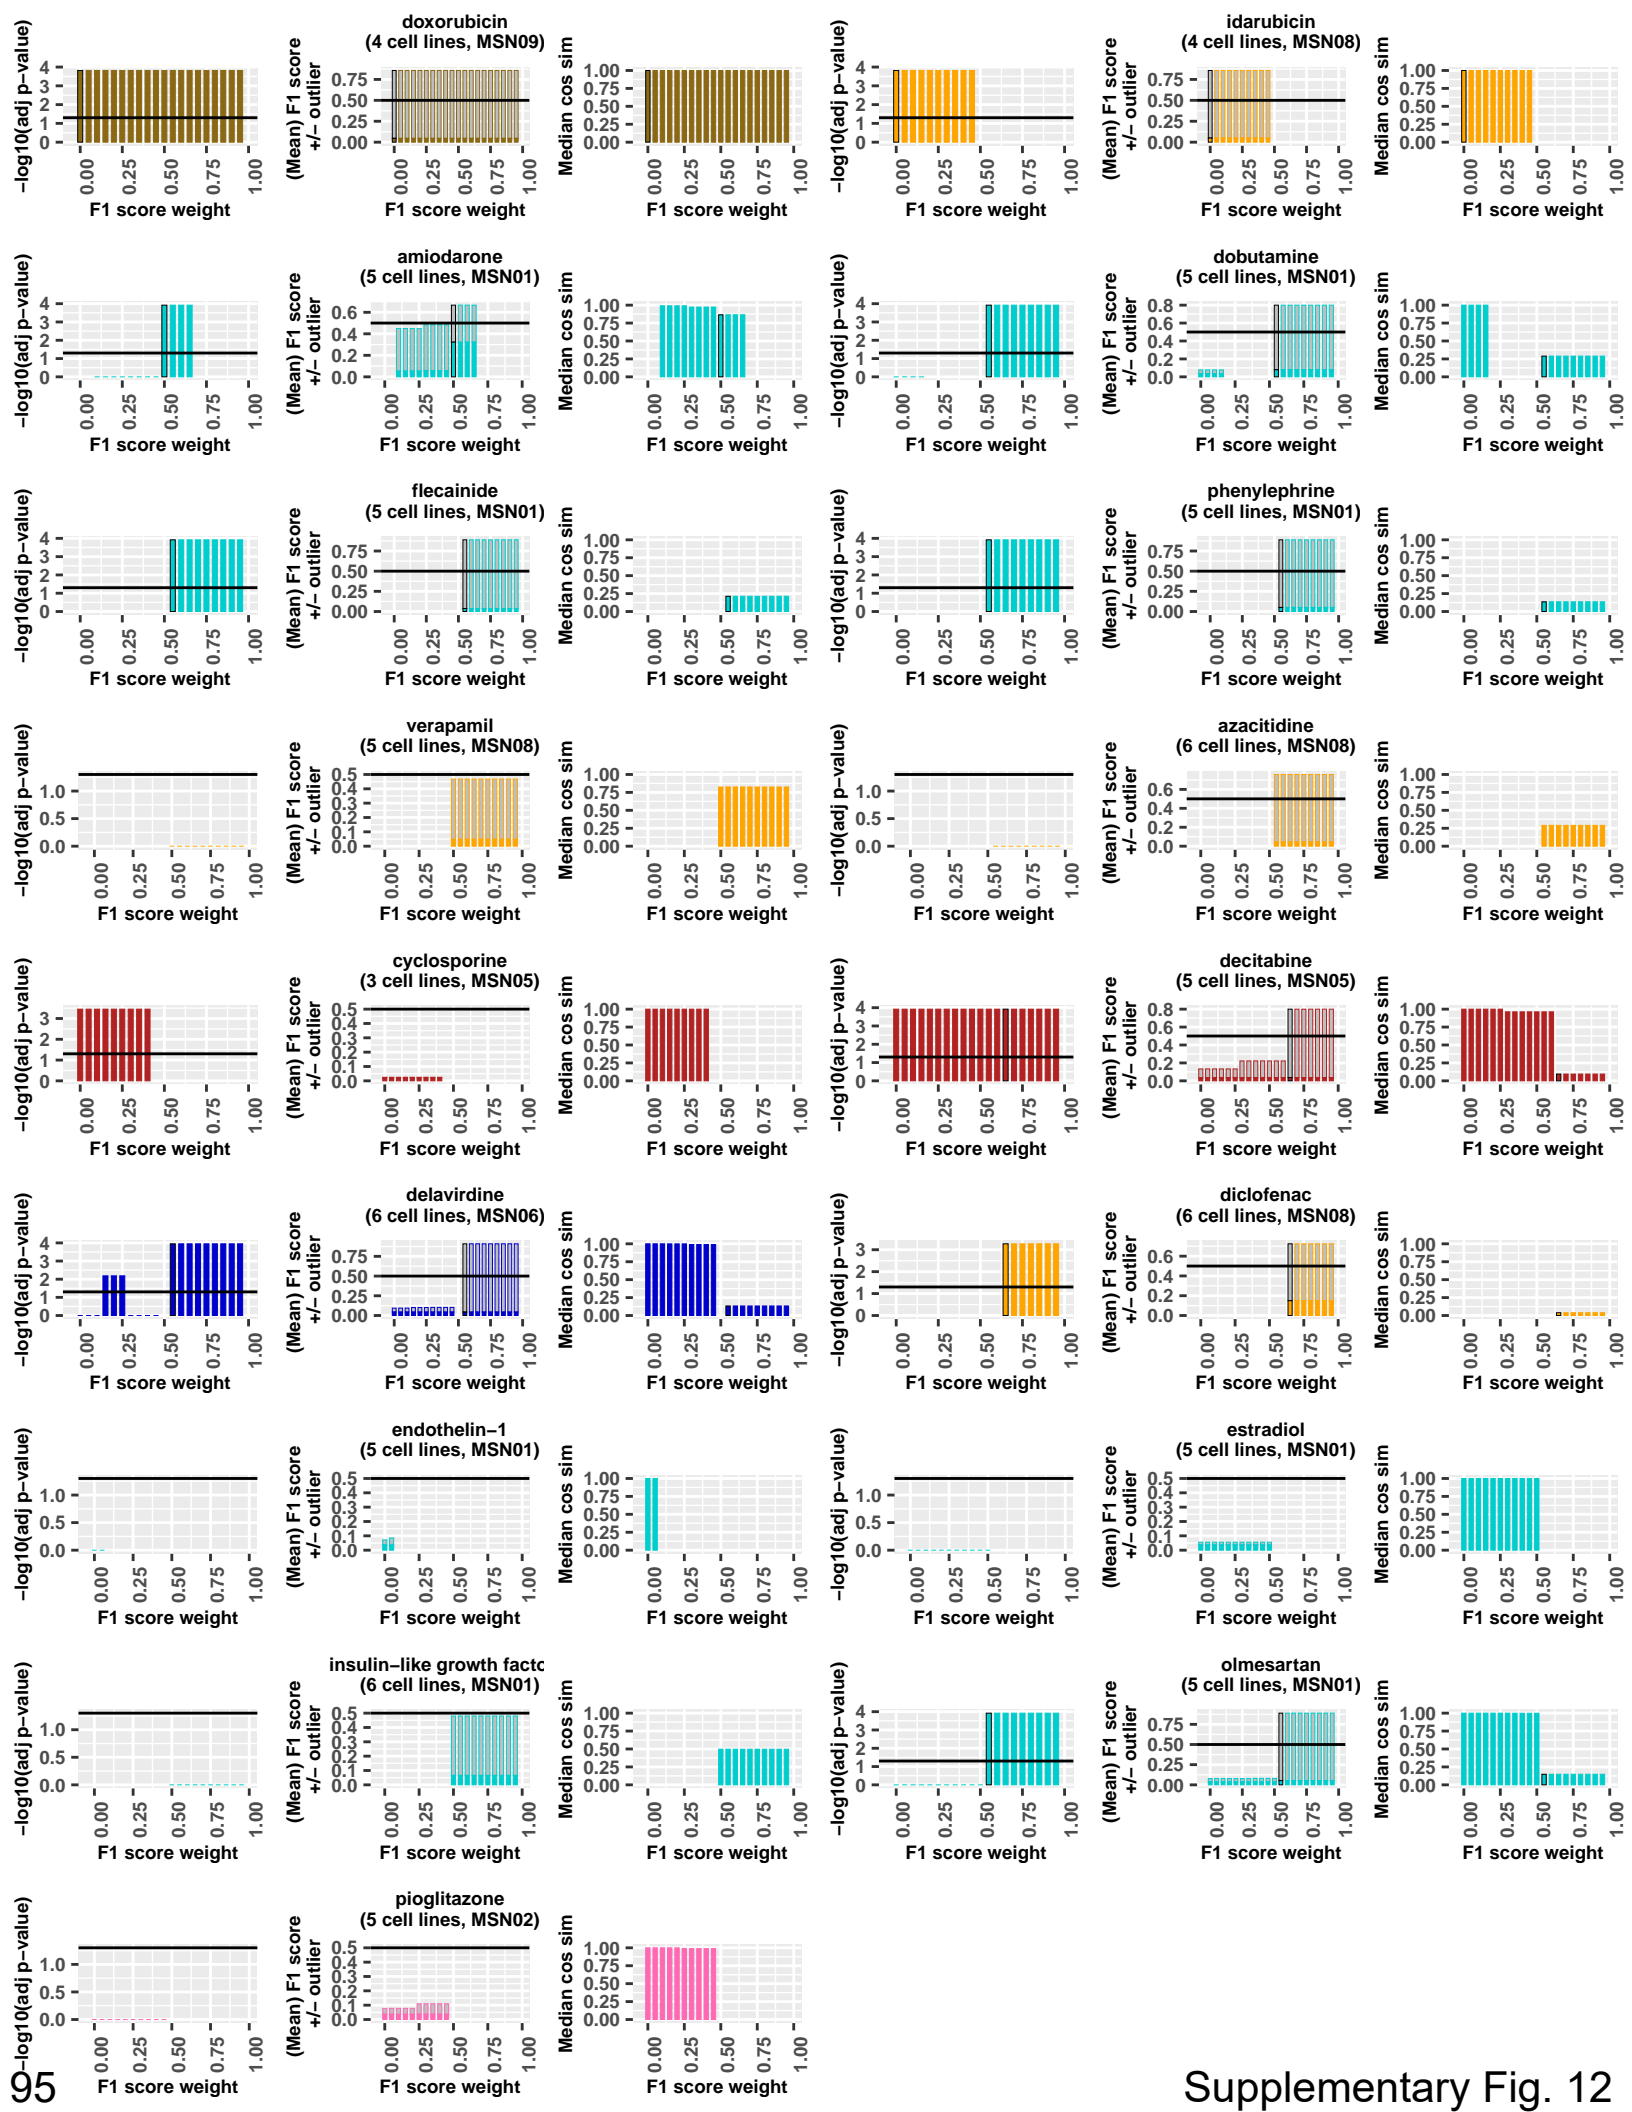

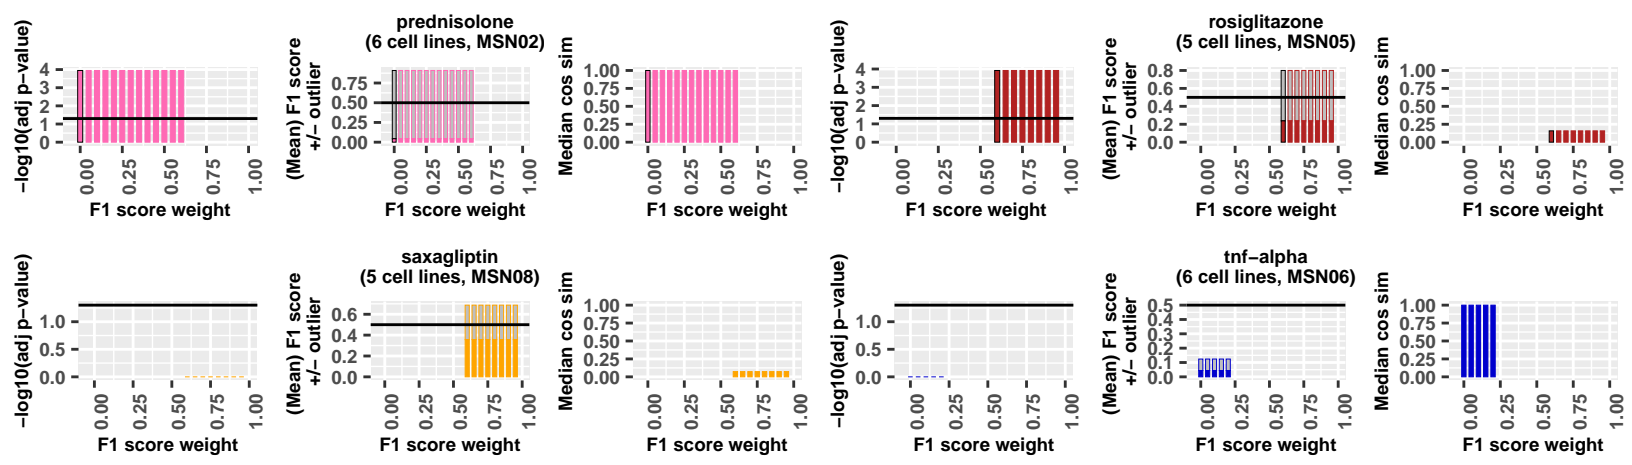



**Supplementary Figure 12.** Identification of outlier responses. For each drug, we screened all 20 potential drug-selective subspaces (that are defined by different F1 score weights) for subspaces where one cell line/drug combination shows a different transcriptomic response to the drug of interest than all other cell line/drug combinations. As shown for an example in Suppl. Figure 10D, we calculated cell line/drug combination-specific F1 scores, using the same approach described above, except that the cell line/drug combination of interest has to be part of the corresponding cluster. Dixon's Q test of cell line/drug combination-specific F1 scores was used to identify outliers (adj. p-value = 0.05). Identified outliers were only accepted, if the mean F1 score of all non-outlier cell line/drug combinations was larger than 0.5 (empty bars in middle figure). We selected that subspace with the most significant adjusted p-value as the final drug-selective subspace (black frame). Mean F1 scores of all non-outlier cell line/drug combinations and decreasing F1 score weight were used as first and second tiebreakers, respectively. If no outlier was identified, we selected that subspace with the highest selection score based on an F1 score weight of 0.95.

**MBCOL1  
afatinib**  
(is c.toxic: no)

**MBCOL1  
axitinib**  
(is c.toxic: no)

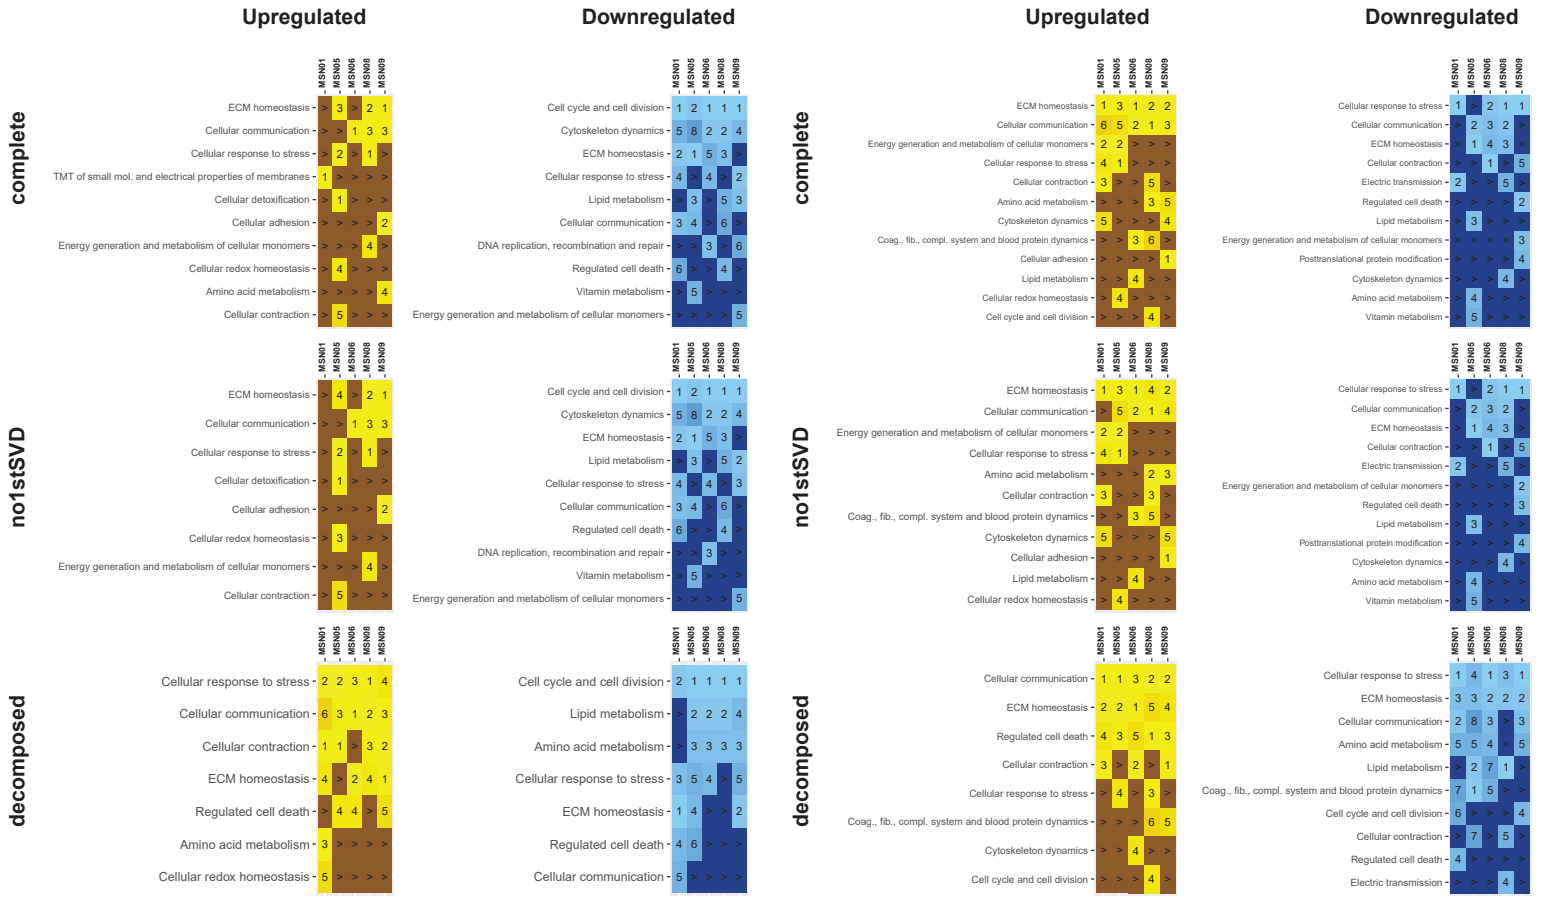

**MBCOL1  
bosutinib**  
(is c.toxic: no)

**MBCOL1  
cabozantinib**  
(is c.toxic: no)

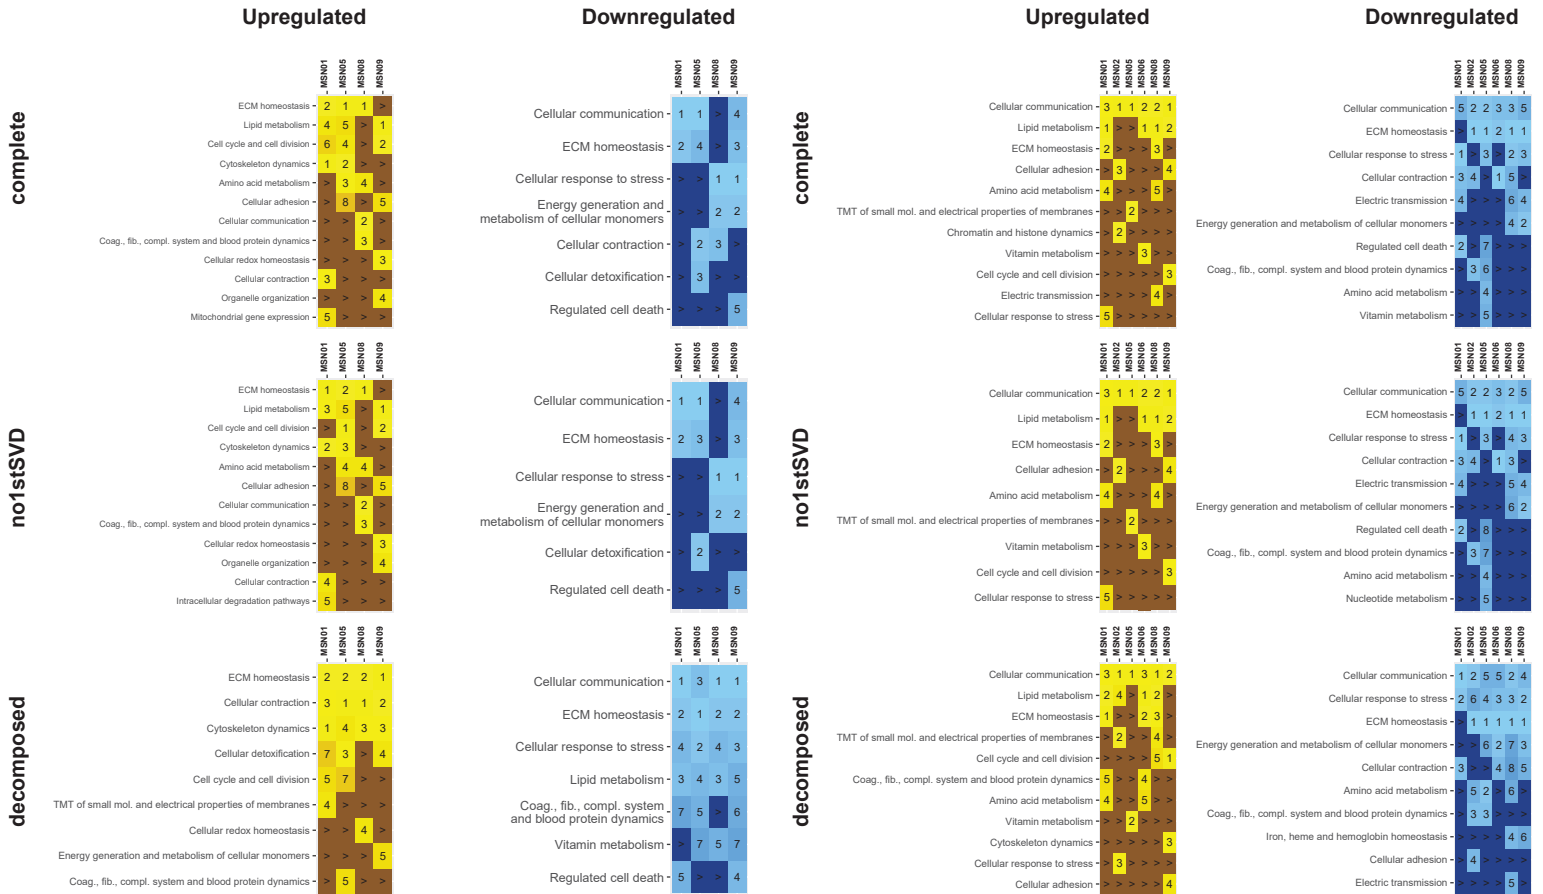

**MBCOL1  
ceritinib  
(is c.toxic: no)**

**MBCOL1  
crizotinib  
(is c.toxic: no)**

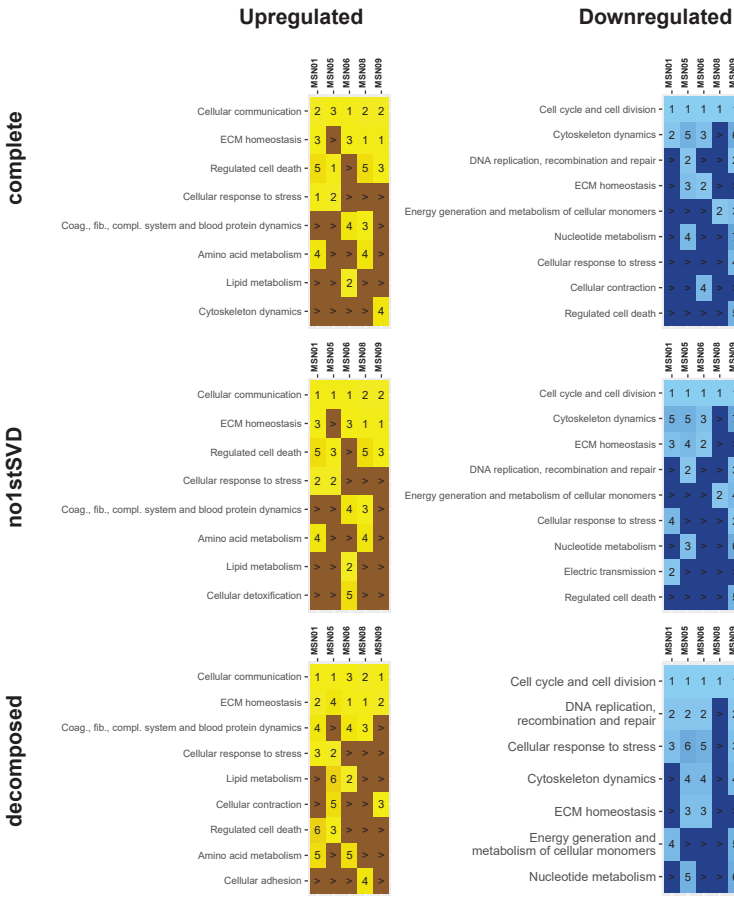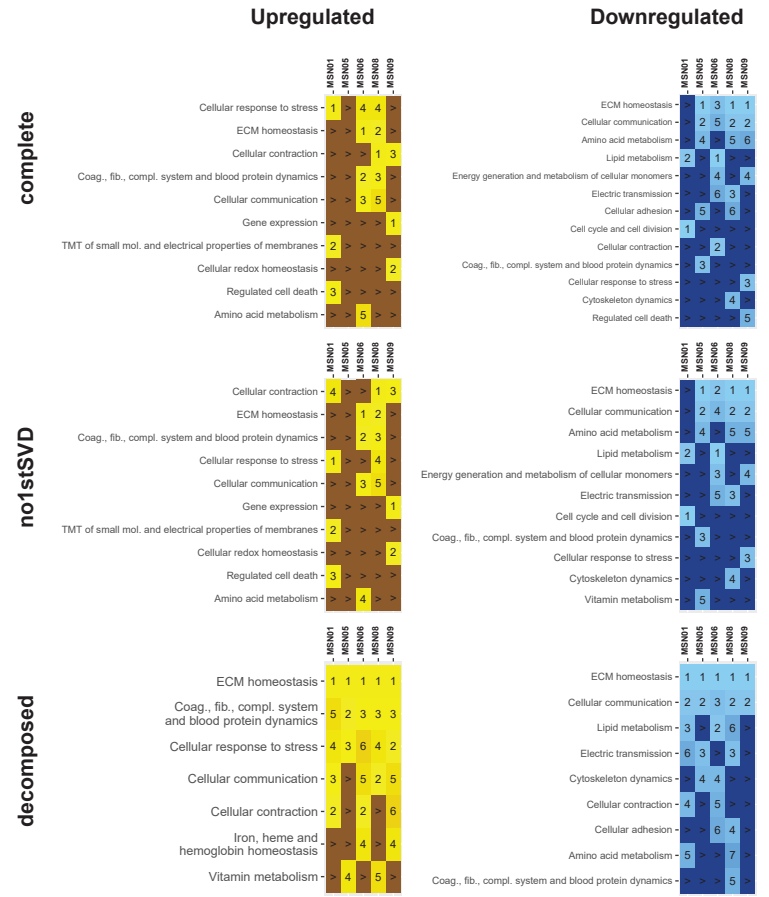

**MBCOL1  
dabrafenib  
(is c.toxic: yes)**

**MBCOL1  
dasatinib  
(is c.toxic: no)**

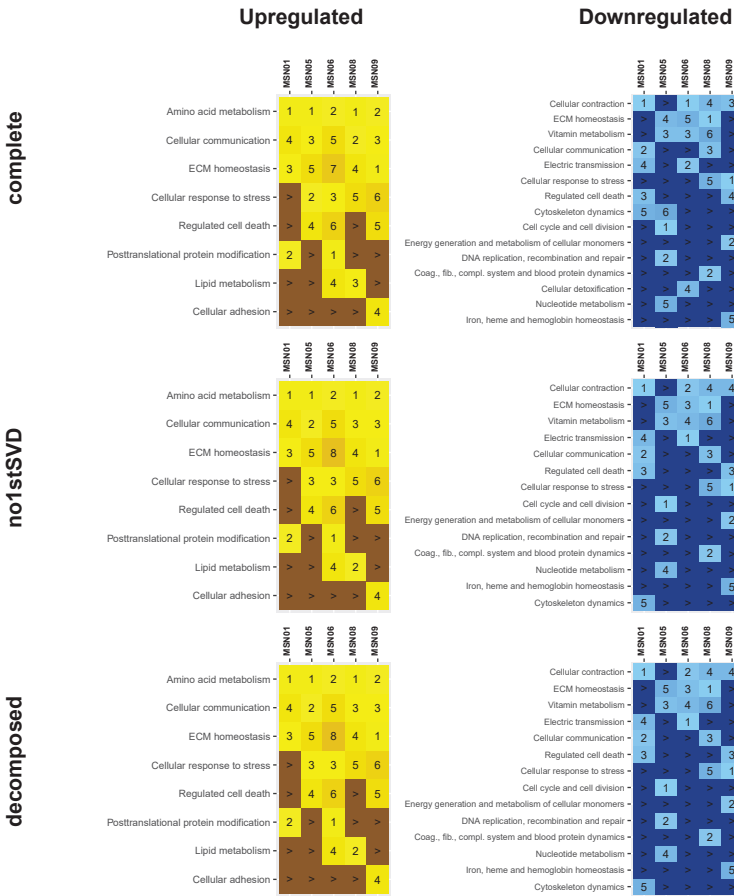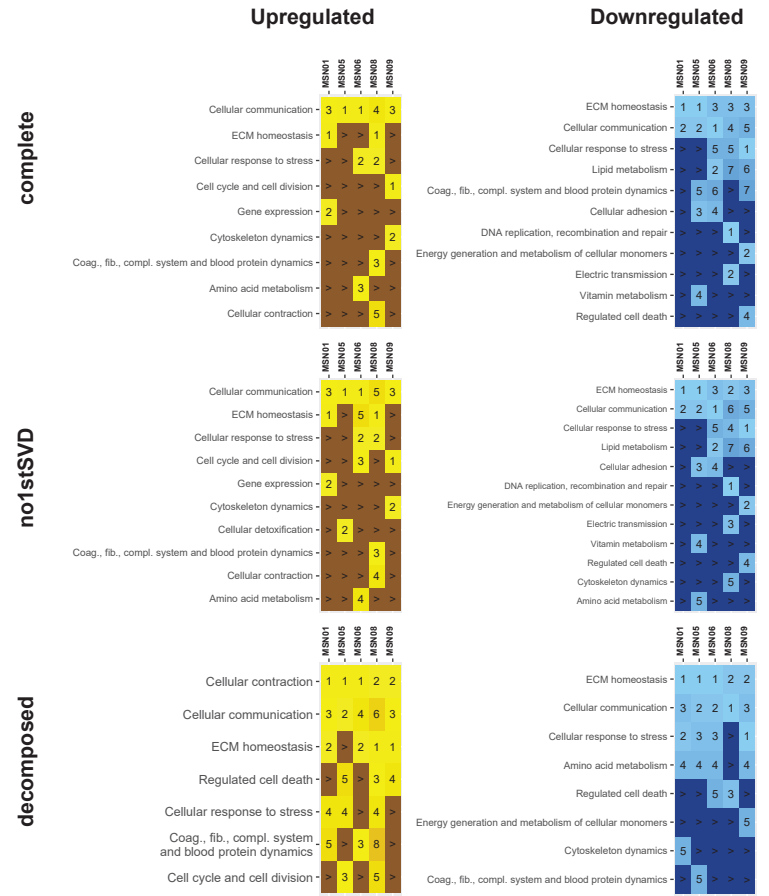

**MBCOL1  
erlotinib  
(is c.toxic: no)**

**MBCOL1  
gefitinib  
(is c.toxic: no)**

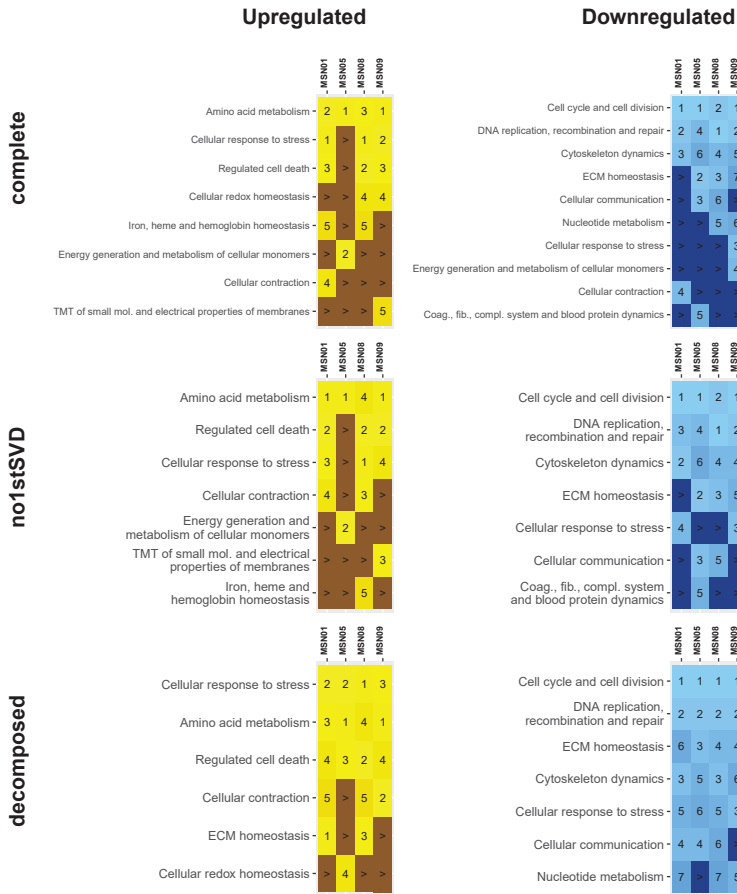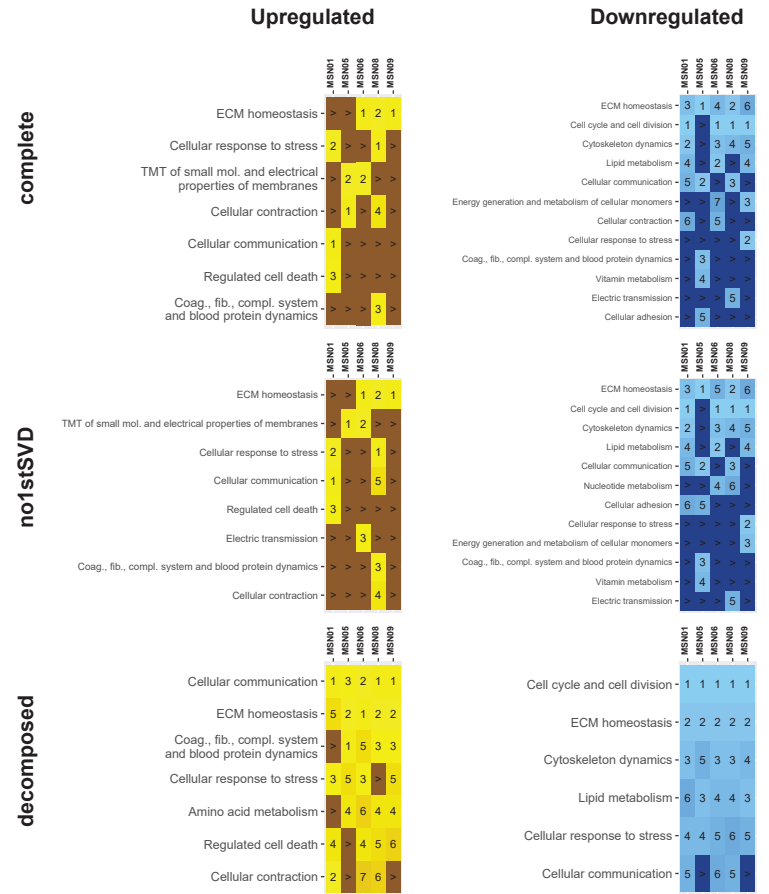

**MBCOL1  
imatinib  
(is c.toxic: no)**

**MBCOL1  
lapatinib  
(is c.toxic: yes)**

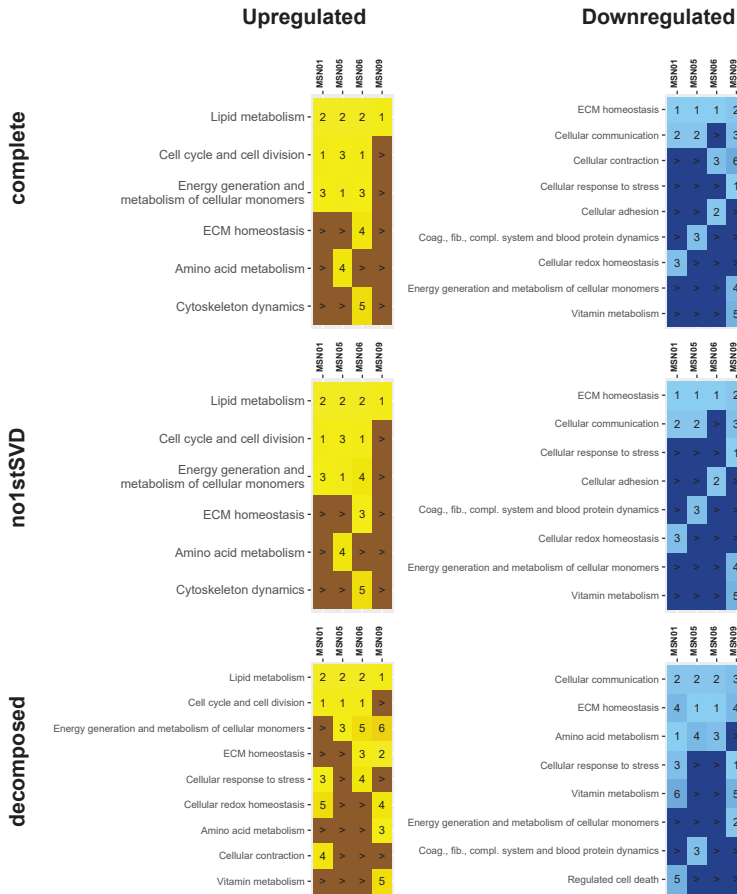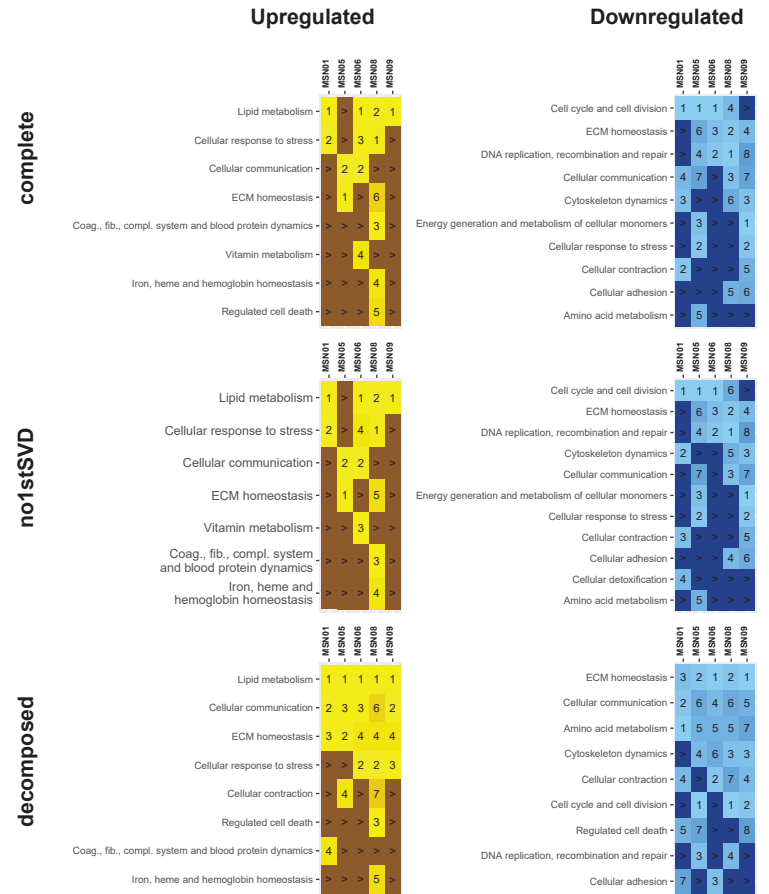

**MBCOL1**  
**nilotinib**  
(is c.toxic: no)

**Upregulated**

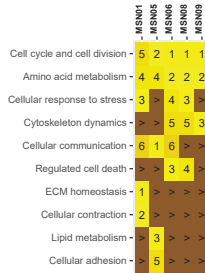

**Downregulated**

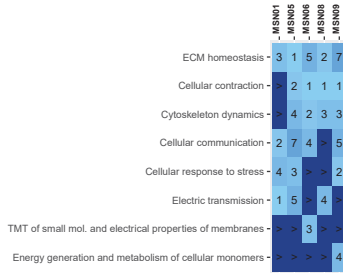

**MBCOL1**  
**pazopanib**  
(is c.toxic: yes)

**Upregulated**

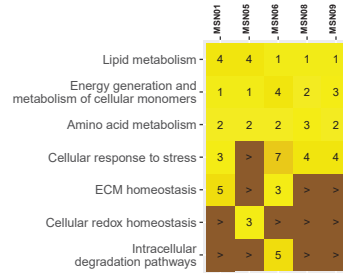

**Downregulated**

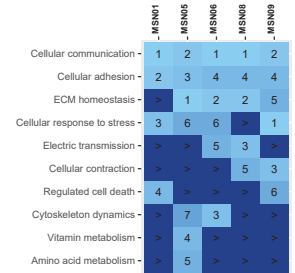

complete

no1stSVD

decomposed

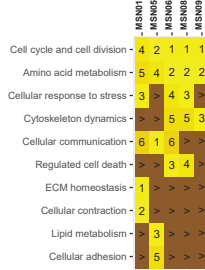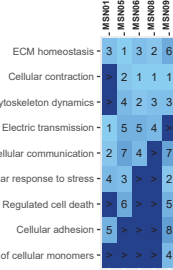

complete

no1stSVD

decomposed

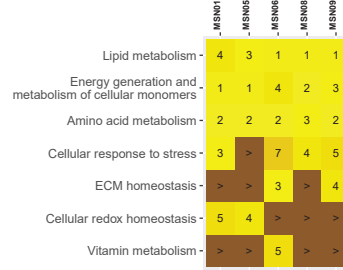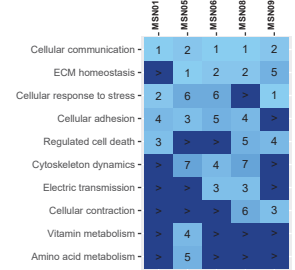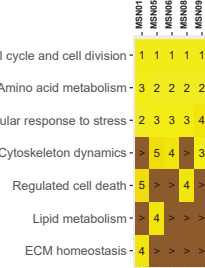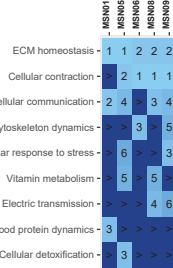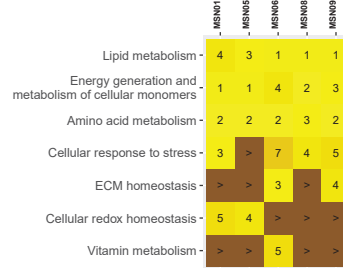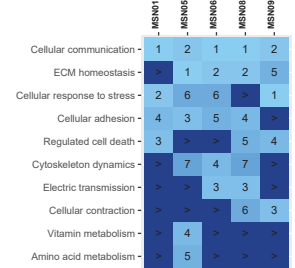

**MBCOL1**  
**ponatinib**  
(is c.toxic: yes)

**Upregulated**

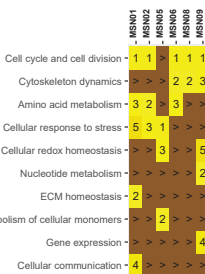

**Downregulated**

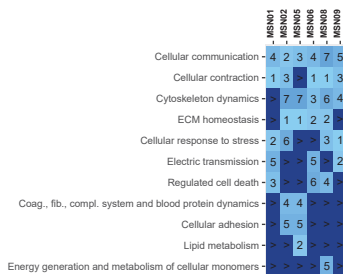

**MBCOL1**  
**regorafenib**  
(is c.toxic: no)

**Upregulated**

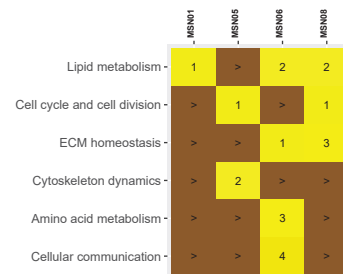

**Downregulated**

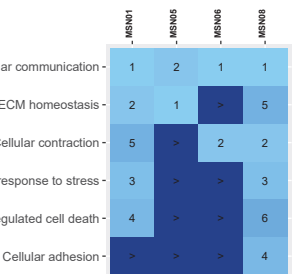

complete

no1stSVD

decomposed

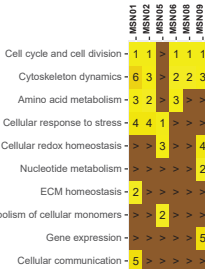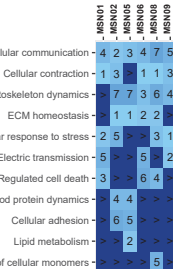

complete

no1stSVD

decomposed

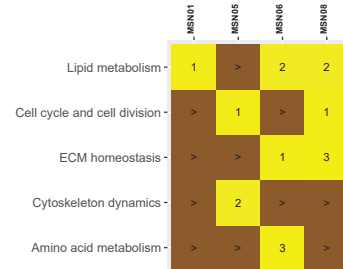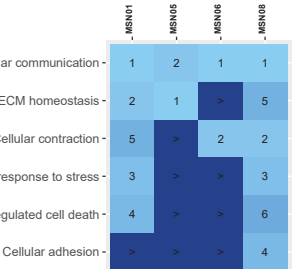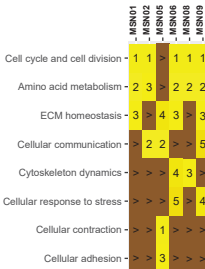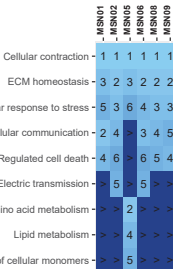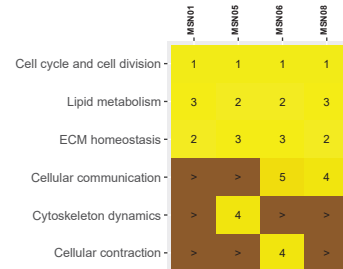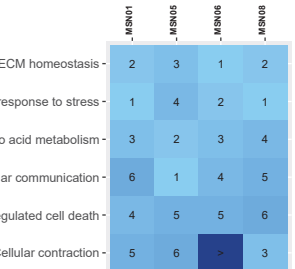

**MBCOL1  
ruxolitinib  
(is c.toxic: no)**

**MBCOL1  
sorafenib  
(is c.toxic: yes)**

**complete**

**Upregulated**

|                                           | _MSN01 | _MSN02 | _MSN05 | _MSN06 | _MSN08 | _MSN09 |
|-------------------------------------------|--------|--------|--------|--------|--------|--------|
| ECM homeostasis                           | >>>    | 1      | 1      | 1      | >      |        |
| Cellular communication                    | >>>    | 2      | 4      | 3      | >      |        |
| Cellular adhesion                         | >>>    | >      | >      | 2      | 2      |        |
| Gene expression                           | >      | 1      | >      | >      | >      |        |
| Cellular redox homeostasis                | 1      | >      | >      | >      | >      |        |
| Cell cycle and cell division              | >>     | 1      | >      | >      | >      |        |
| DNA replication, recombination and repair | >>     | 2      | >      | >      | >      |        |
| Lipid metabolism                          | >>     | >      | 3      | >      | >      |        |
| Electric transmission                     | >>     | >      | 3      | >      | >      |        |

**Downregulated**

|                                                       | _MSN01 | _MSN02 | _MSN05 | _MSN06 | _MSN08 | _MSN09 |
|-------------------------------------------------------|--------|--------|--------|--------|--------|--------|
| Cellular communication                                | 1      | 2      | 5      | 1      | 3      | 3      |
| ECM homeostasis                                       | 3      | 1      | 1      | 2      | 1      | >      |
| Cellular response to stress                           | 2      | 4      | 4      | 2      | 1      |        |
| Regulated cell death                                  | 5      | 2      | 3      | 4      | >      |        |
| Cellular contraction                                  | 6      | 7      | 3      | 4      | >      |        |
| Energy generation and metabolism of cellular monomers | >      | >      | 6      | 6      | 2      |        |
| Cytoskeleton dynamics                                 | 4      | >      | >      | 7      | >      |        |
| Coag., fib., compl. system and blood protein dynamics | 6      | 6      | 5      | >      | >      |        |
| Cellular adhesion                                     | 3      | >      | >      | >      | >      |        |
| Lipid metabolism                                      | >      | >      | >      | >      | 4      |        |
| Cell cycle and cell division                          | 4      | >      | >      | >      | >      |        |
| Electric transmission                                 | >      | >      | 5      | >      | >      |        |
| Cellular protrusion dynamics                          | 5      | >      | >      | >      | >      |        |

**complete**

**Upregulated**

|                              | _MSN01 | _MSN05 | _MSN08 | _MSN09 |
|------------------------------|--------|--------|--------|--------|
| Cell cycle and cell division | 1      | 1      | 1      | 1      |
| Lipid metabolism             | 2      | 2      | >      | 2      |
| Amino acid metabolism        | >      | >      | 2      | >      |
| Cytoskeleton dynamics        | >      | >      | >      | 3      |
| Cellular communication       | >      | >      | >      | 4      |
| Cellular adhesion            | >      | >      | >      | 5      |

**Downregulated**

|                             | _MSN01 | _MSN05 | _MSN08 | _MSN09 |
|-----------------------------|--------|--------|--------|--------|
| Cellular communication      | 1      | 2      | 2      | 2      |
| ECM homeostasis             | 4      | 1      | 1      | 5      |
| Cellular response to stress | 3      | 3      | 4      | 1      |
| Cellular contraction        | 2      | >      | 3      | 3      |
| Vitamin metabolism          | 5      | 4      | >      | >      |
| Regulated cell death        | 6      | >      | 4      | >      |
| Electric transmission       | 5      | >      | >      | >      |

**no1stSVD**

|                                           | _MSN01 | _MSN02 | _MSN05 | _MSN06 | _MSN08 | _MSN09 |
|-------------------------------------------|--------|--------|--------|--------|--------|--------|
| ECM homeostasis                           | >>>    | >      | 1      | 1      | 1      |        |
| Cellular communication                    | >>>    | >      | 2      | 4      | 3      |        |
| Cellular adhesion                         | >>>    | >      | >      | 3      | 2      |        |
| Gene expression                           | >      | 1      | >      | >      | >      |        |
| Cellular contraction                      | 1      | >      | >      | >      | >      |        |
| Cell cycle and cell division              | >>     | 1      | >      | >      | >      |        |
| Electric transmission                     | >>     | 2      | >      | 2      | >      |        |
| DNA replication, recombination and repair | >>     | 2      | >      | >      | >      |        |
| Cellular redox homeostasis                | 2      | >      | >      | >      | >      |        |
| Lipid metabolism                          | >      | >      | 3      | >      | >      |        |

|                                                       | _MSN01 | _MSN02 | _MSN05 | _MSN06 | _MSN08 | _MSN09 |
|-------------------------------------------------------|--------|--------|--------|--------|--------|--------|
| Cellular communication                                | 1      | 2      | 5      | 1      | 5      | 3      |
| ECM homeostasis                                       | 3      | 1      | 1      | 5      | 1      | >      |
| Cellular response to stress                           | 2      | 4      | 4      | 2      | 1      |        |
| Regulated cell death                                  | 5      | 2      | 3      | 3      | >      |        |
| Cellular contraction                                  | 6      | 7      | 3      | 4      | 6      | 2      |
| Energy generation and metabolism of cellular monomers | >      | >      | 6      | 6      | 2      |        |
| Cytoskeleton dynamics                                 | 4      | >      | >      | 7      | >      |        |
| Coag., fib., compl. system and blood protein dynamics | 6      | 6      | 5      | >      | >      |        |
| Cellular adhesion                                     | 3      | >      | >      | >      | >      |        |
| Lipid metabolism                                      | >      | >      | >      | >      | 4      |        |
| Cell cycle and cell division                          | 4      | >      | >      | >      | >      |        |
| Electric transmission                                 | >      | >      | 5      | >      | >      |        |
| Cellular protrusion dynamics                          | 5      | >      | >      | >      | >      |        |

**no1stSVD**

|                              | _MSN01 | _MSN05 | _MSN08 | _MSN09 |
|------------------------------|--------|--------|--------|--------|
| Cell cycle and cell division | 1      | 1      | 1      | 1      |
| Lipid metabolism             | 2      | 2      | >      | 2      |
| Amino acid metabolism        | >      | >      | 2      | >      |
| Cytoskeleton dynamics        | >      | >      | >      | 3      |
| Cellular communication       | >      | >      | >      | 4      |
| Cellular adhesion            | >      | >      | >      | 5      |

|                             | _MSN01 | _MSN05 | _MSN08 | _MSN09 |
|-----------------------------|--------|--------|--------|--------|
| Cellular communication      | 1      | 2      | 3      | 2      |
| Cellular response to stress | 3      | 3      | 2      | 1      |
| ECM homeostasis             | 4      | 1      | 1      | >      |
| Cellular contraction        | 2      | >      | 4      | 3      |
| Regulated cell death        | 6      | 6      | 5      | 4      |
| Vitamin metabolism          | 5      | 4      | >      | >      |
| Electric transmission       | 5      | >      | >      | >      |

**decomposed**

|                                                       | _MSN01 | _MSN02 | _MSN05 | _MSN06 | _MSN08 | _MSN09 |
|-------------------------------------------------------|--------|--------|--------|--------|--------|--------|
| ECM homeostasis                                       | 2      | 2      | 1      | 1      | 1      | 1      |
| Coag., fib., compl. system and blood protein dynamics | >      | 3      | 4      | 3      | 2      | 3      |
| Cellular communication                                | 3      | >      | 2      | 5      | 3      | 5      |
| Cell cycle and cell division                          | 1      | 1      | >      | 4      | >      | 2      |
| Lipid metabolism                                      | >      | >      | 3      | 2      | 4      | 4      |
| Cellular response to stress                           | >      | 5      | 5      | >      | >      | >      |
| DNA replication, recombination and repair             | >      | 4      | >      | >      | >      | >      |
| Iron, heme and hemoglobin homeostasis                 | >      | >      | >      | >      | 5      | >      |

|                                                       | _MSN01 | _MSN02 | _MSN05 | _MSN06 | _MSN08 | _MSN09 |
|-------------------------------------------------------|--------|--------|--------|--------|--------|--------|
| Cellular contraction                                  | 2      | 1      | 2      | 1      | 1      | 3      |
| Amino acid metabolism                                 | 1      | 2      | 1      | 2      | 2      | 2      |
| ECM homeostasis                                       | 5      | 3      | 3      | 3      | 1      | 1      |
| Cellular communication                                | 4      | 6      | 5      | 4      | 6      | 5      |
| Regulated cell death                                  | 7      | 4      | 6      | 7      | 5      | 4      |
| Cytoskeleton dynamics                                 | 6      | 5      | >      | 7      | 7      |        |
| Coag., fib., compl. system and blood protein dynamics | >      | 4      | >      | 4      | >      |        |
| Cellular response to stress                           | 3      | >      | >      | >      | >      |        |
| Electric transmission                                 | >      | >      | 5      | >      | >      |        |

**decomposed**

|                                                       | _MSN01 | _MSN05 | _MSN08 | _MSN09 |
|-------------------------------------------------------|--------|--------|--------|--------|
| Cell cycle and cell division                          | 1      | 1      | 1      | 1      |
| Cytoskeleton dynamics                                 | 4      | 3      | 5      | 3      |
| Lipid metabolism                                      | 2      | 2      | 4      | >      |
| Cellular response to stress                           | 5      | 5      | 3      | >      |
| Regulated cell death                                  | >      | 4      | >      | 4      |
| Coag., fib., compl. system and blood protein dynamics | >      | 7      | >      | 5      |
| ECM homeostasis                                       | >      | >      | >      | 2      |
| Amino acid metabolism                                 | >      | >      | 2      | >      |
| Mitochondrial gene expression                         | 3      | >      | >      | >      |

|                                                       | _MSN01 | _MSN05 | _MSN08 | _MSN09 |
|-------------------------------------------------------|--------|--------|--------|--------|
| Cellular communication                                | 3      | 1      | 2      | 1      |
| Cellular response to stress                           | 1      | 2      | 3      | 2      |
| ECM homeostasis                                       | 2      | 3      | 1      | 3      |
| Cellular contraction                                  | 4      | 4      | >      | 4      |
| Amino acid metabolism                                 | 5      | 6      | >      | >      |
| Vitamin metabolism                                    | >      | >      | >      | 5      |
| Coag., fib., compl. system and blood protein dynamics | 5      | 5      | >      | >      |

**MBCOL1  
sunitinib  
(is c.toxic: yes)**

**MBCOL1  
tofacitinib  
(is c.toxic: no)**

**complete**

**Upregulated**

|                                                       | _MSN01 | _MSN02 | _MSN05 | _MSN06 | _MSN08 | _MSN09 |
|-------------------------------------------------------|--------|--------|--------|--------|--------|--------|
| Amino acid metabolism                                 | >>     | 1      | 5      | 1      | 2      |        |
| ECM homeostasis                                       | >      | 3      | 2      | 1      | >      |        |
| Cellular communication                                | >>     | 3      | 4      | 4      | 1      |        |
| Energy generation and metabolism of cellular monomers | 1      | 2      | >      | >      | >      |        |
| Cellular response to stress                           | 2      | 1      | >      | 4      | >      |        |
| Coag., fib., compl. system and blood protein dynamics | >      | 4      | >      | >      | 3      |        |
| Organelle organization                                | 3      | >      | >      | >      | >      |        |
| Lipid metabolism                                      | >      | 3      | >      | >      | >      |        |
| Mitochondrial gene expression                         | 4      | >      | >      | >      | >      |        |
| Electric transmission                                 | >      | >      | >      | >      | 4      |        |
| Iron, heme and hemoglobin homeostasis                 | >      | >      | >      | >      | 5      |        |

**Downregulated**

|                                                       | _MSN01 | _MSN02 | _MSN05 | _MSN06 | _MSN08 | _MSN09 |
|-------------------------------------------------------|--------|--------|--------|--------|--------|--------|
| ECM homeostasis                                       | 4      | 1      | 1      | 1      | 1      | 1      |
| Cellular contraction                                  | 4      | >      | 2      | 3      | 3      | 3      |
| Cellular communication                                | 2      | 3      | 4      | 5      | 7      |        |
| Coag., fib., compl. system and blood protein dynamics | 3      | 4      | >      | 4      | 8      |        |
| Regulated cell death                                  | 2      | >      | >      | 6      | 5      |        |
| Cytoskeleton dynamics                                 | 3      | 4      | >      | 6      | 6      |        |
| Cellular response to stress                           | >      | >      | >      | 2      | 4      |        |
| Cell cycle and cell division                          | 1      | >      | >      | >      | >      |        |
| Energy generation and metabolism of cellular monomers | >      | >      | >      | >      | 2      |        |
| Electric transmission                                 | >      | >      | 3      | >      | >      |        |
| Cellular adhesion                                     | 5      | >      | >      | >      | >      |        |

**complete**

**Upregulated**

|                             | _MSN01 | _MSN05 | _MSN08 | _MSN09 |
|-----------------------------|--------|--------|--------|--------|
| ECM homeostasis             | >      | 1      | 1      | 2      |
| Cellular communication      | >      | 4      | >      | 3      |
| Cellular response to stress | 2      | >      | >      | 1      |
| Vitamin metabolism          | >      | 3      | >      | 4      |
| Cellular contraction        | 1      | >      | >      | >      |
| Cellular adhesion           | >      | >      | >      | 2      |
| Amino acid metabolism       | >      | 2      | >      | >      |
| Regulated cell death        | 3      | >      | >      | >      |

**Downregulated**

|                                                          | _MSN01 | _MSN05 | _MSN08 | _MSN09 |
|----------------------------------------------------------|--------|--------|--------|--------|
| Cellular communication                                   | 2      | 2      | 4      | 1      |
| ECM homeostasis                                          | 4      | 1      | 2      | 7      |
| Lipid metabolism                                         | 3      | 2      | 4      | 4      |
| Coag., fib., compl. system and blood protein dynamics    | 6      | 3      | >      | 5      |
| Energy generation and metabolism of cellular monomers    | 1      | >      | >      | 1      |
| Electric transmission                                    | 5      | 3      | >      | 3      |
| Cellular response to stress                              | 8      | >      | >      | 2      |
| Cellular adhesion                                        | 7      | >      | >      | 5      |
| Cell cycle and cell division                             | 1      | >      | >      | >      |
| TMT of small mol. and electrical properties of membranes | 3      | >      | >      | >      |
| Cytoskeleton dynamics                                    | >      | >      | >      | 4      |

**no1stSVD**

|                                                       | _MSN01 | _MSN02 | _MSN05 | _MSN06 | _MSN08 | _MSN09 |
|-------------------------------------------------------|--------|--------|--------|--------|--------|--------|
| Amino acid metabolism                                 | >      | 2      | 6      | 1      | 2      |        |
| ECM homeostasis                                       | >      | 3      | 1      | 1      | >      |        |
| Cellular communication                                | >      | 3      | 5      | >      | 1      |        |
| Energy generation and metabolism of cellular monomers | 1      | 2      | >      | >      | >      |        |
| Cellular response to stress                           | 2      | 1      | >      | >      | >      |        |
| Cellular adhesion                                     | >      | 4      | >      | >      | 3      |        |
| Coag., fib., compl. system and blood protein dynamics | >      | 2      | >      | >      | 2      |        |
| Organelle organization                                | 3      | >      | >      | >      | >      |        |
| Lipid metabolism                                      | >      | 3      | >      | >      | >      |        |
| Vitamin metabolism                                    | >      | 4      | >      | >      | >      |        |
| Mitochondrial gene expression                         | 4      | >      | >      | >      | >      |        |
| Electric transmission                                 | >      | >      | >      | >      | 4      |        |
| Iron, heme and hemoglobin homeostasis                 | >      | >      | >      | >      | 5      |        |

|                                                       | _MSN01 | _MSN02 | _MSN05 | _MSN06 | _MSN08 | _MSN09 |
|-------------------------------------------------------|--------|--------|--------|--------|--------|--------|
| ECM homeostasis                                       | 4      | 1      | 1      | 1      | 1      | 1      |
| Cellular contraction                                  | 4      | >      | 2      | 3      | 3      | 3      |
| Cellular communication                                | 2      | 3      | 2      | 5      | 7      |        |
| Cytoskeleton dynamics                                 | 3      | 4      | >      | 7      | 6      |        |
| Regulated cell death                                  | 2      | >      | >      | 6      | 5      |        |
| Coag., fib., compl. system and blood protein dynamics | >      | 3      | >      | 4      | 8      |        |
| Cellular response to stress                           | >      | 3      | >      | 2      | 4      |        |
| Cell cycle and cell division                          | 1      | >      | >      | >      | >      |        |
| Energy generation and metabolism of cellular monomers | >      | >      | >      | >      | 2      |        |
| Electric transmission                                 | >      | >      | 3      | >      | >      |        |
| Cellular adhesion                                     | 5      | >      | >      | >      | >      |        |

**no1stSVD**

**Upregulated**

|                 | _MSN01 | _MSN05 | _MSN08 | _MSN09 |
|-----------------|--------|--------|--------|--------|
| ECM homeostasis | &gt    |        |        |        |

**MBCOL1  
trametinib  
(is c.toxic: yes)**

**MBCOL1  
vandetanib  
(is c.toxic: yes)**

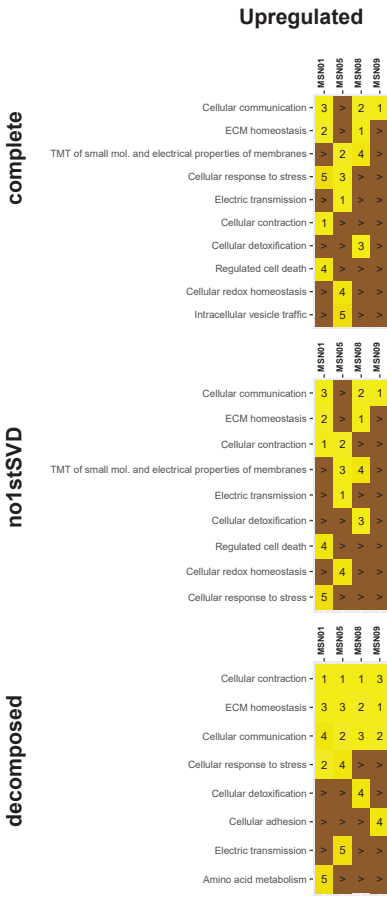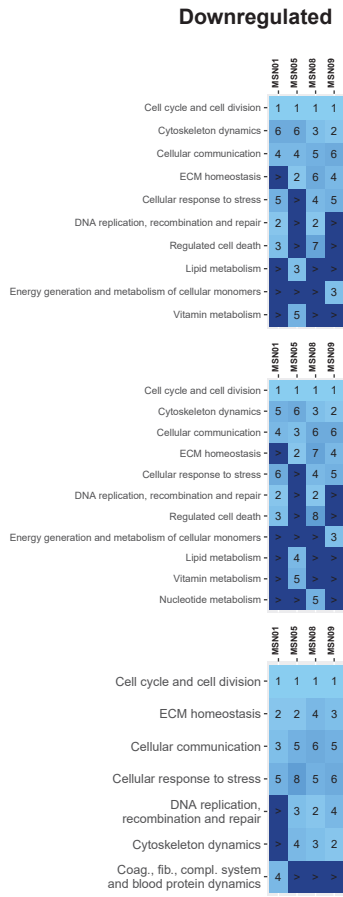

**MBCOL1  
vemurafenib  
(is c.toxic: no)**

**MBCOL1  
bevacizumab  
(is c.toxic: yes)**

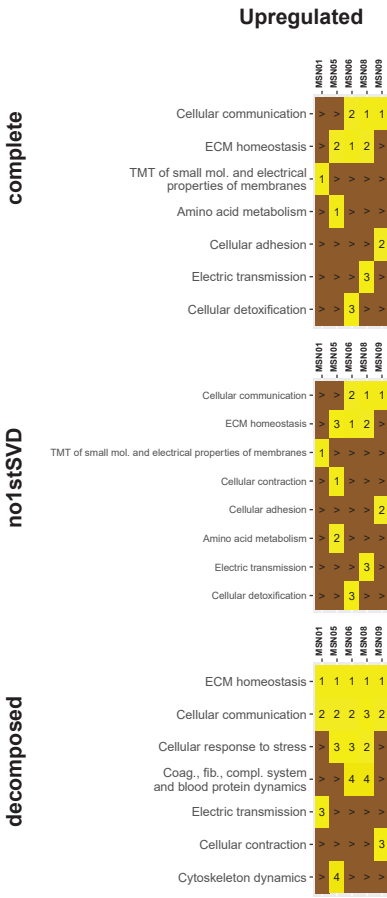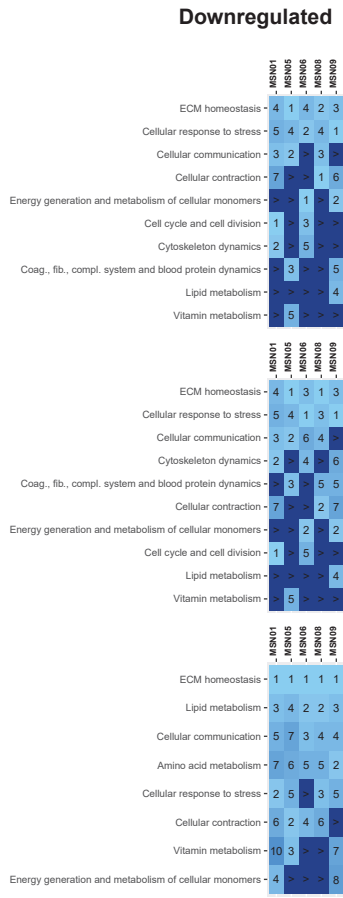

**MBCOL1  
cetuximab  
(is c.toxic: no)**

**MBCOL1  
rituximab  
(is c.toxic: no)**

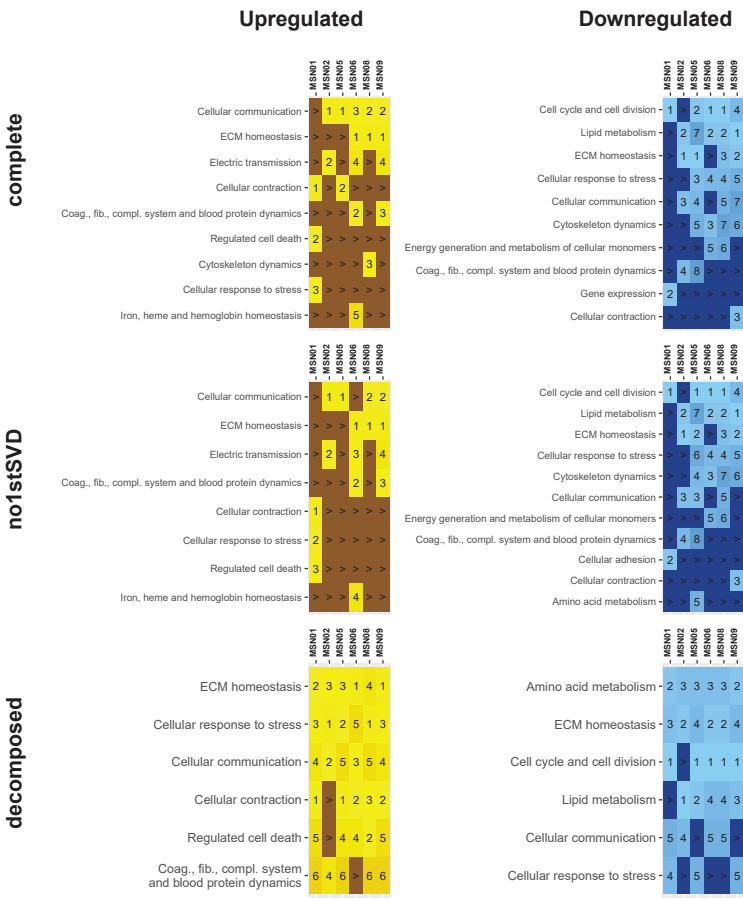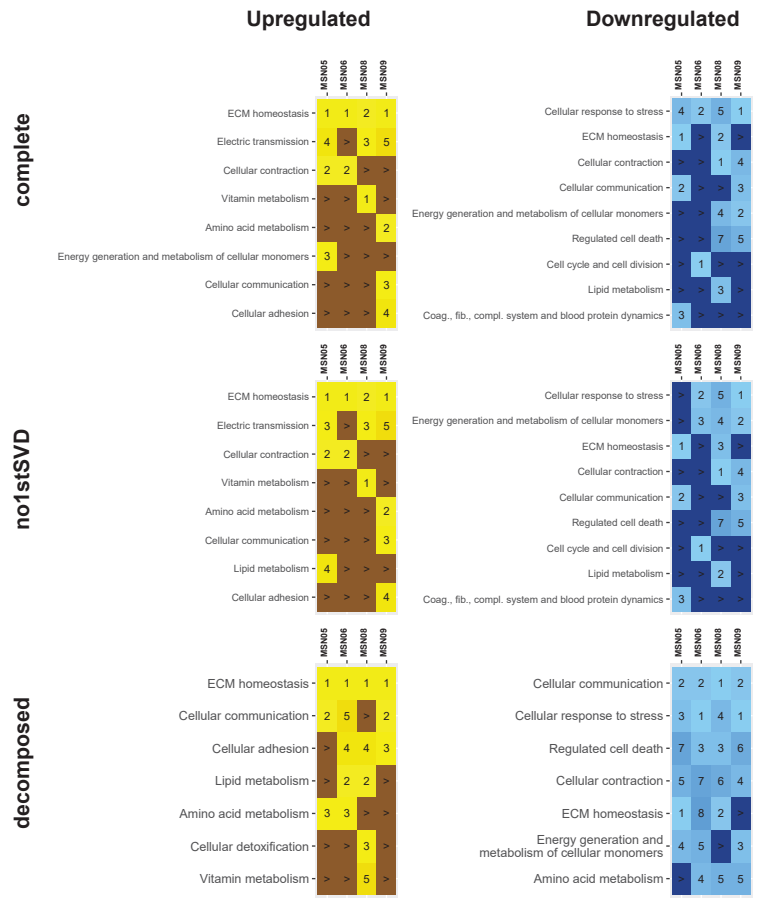

**MBCOL1  
trastuzumab  
(is c.toxic: yes)**

**MBCOL1  
daunorubicin  
(is c.toxic: yes)**

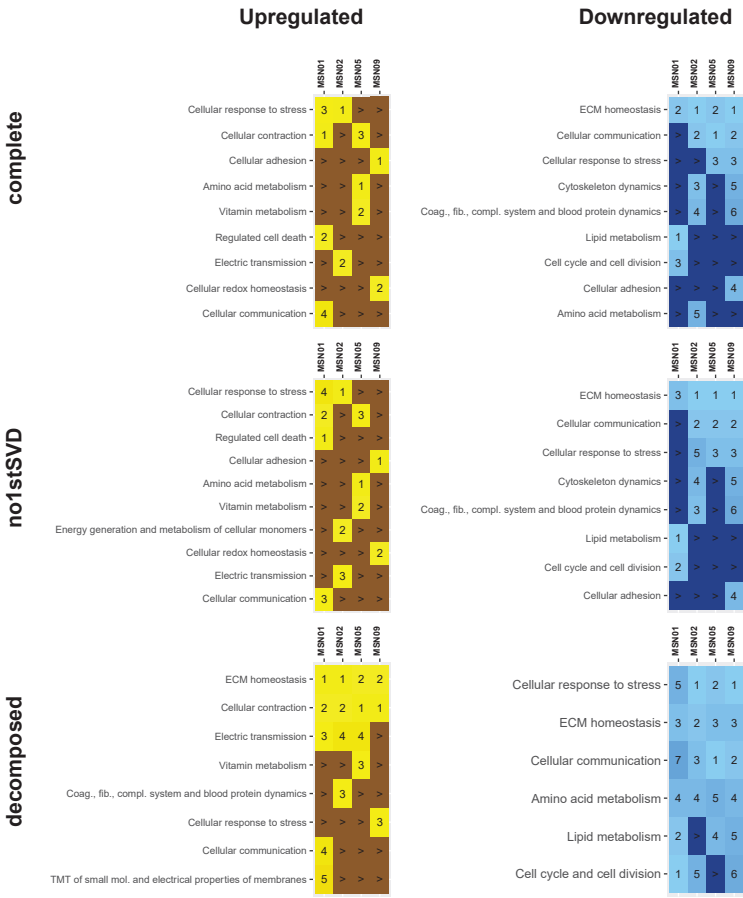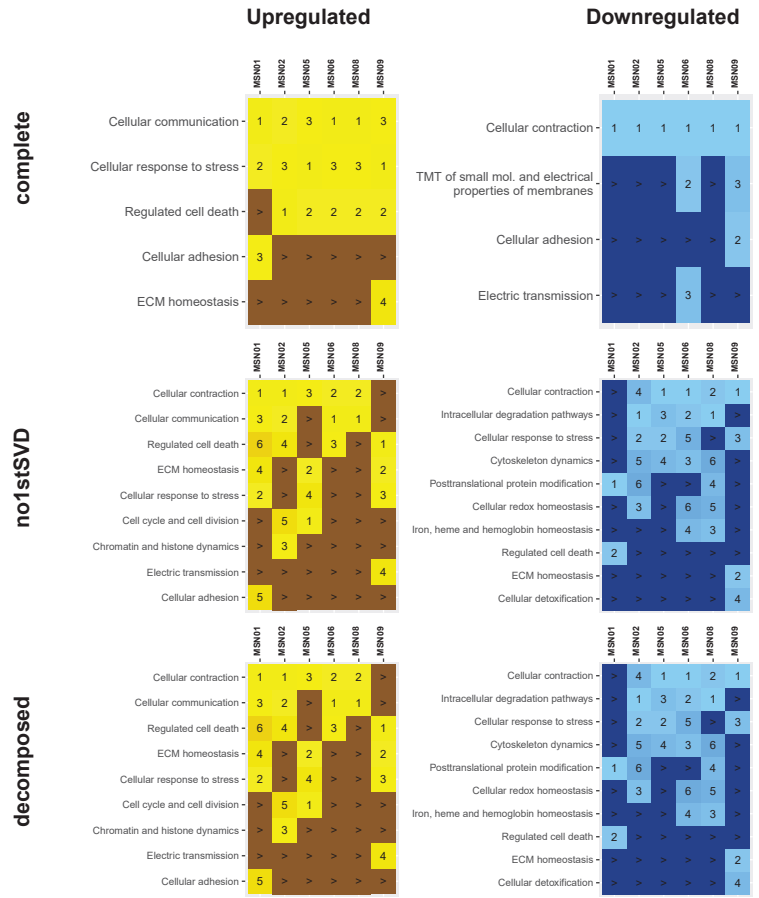



**MBCOL1  
doxorubicin**  
(is c.toxic: yes)

**MBCOL1  
epirubicin**  
(is c.toxic: yes)

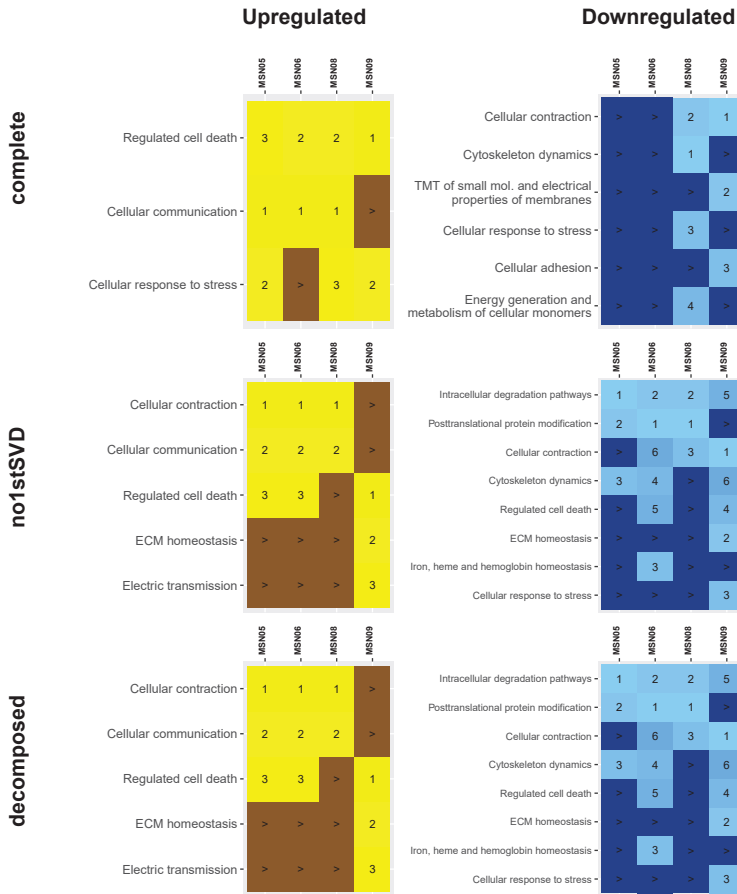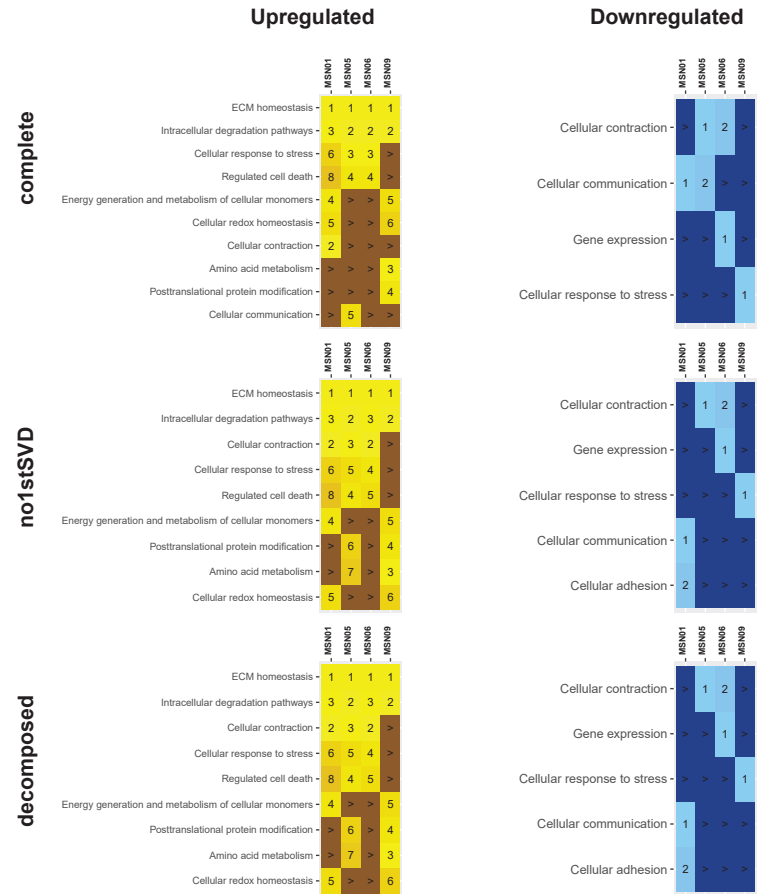

**MBCOL1  
idarubicin**  
(is c.toxic: yes)

**MBCOL1  
amiodarone**  
(is c.toxic: nd)

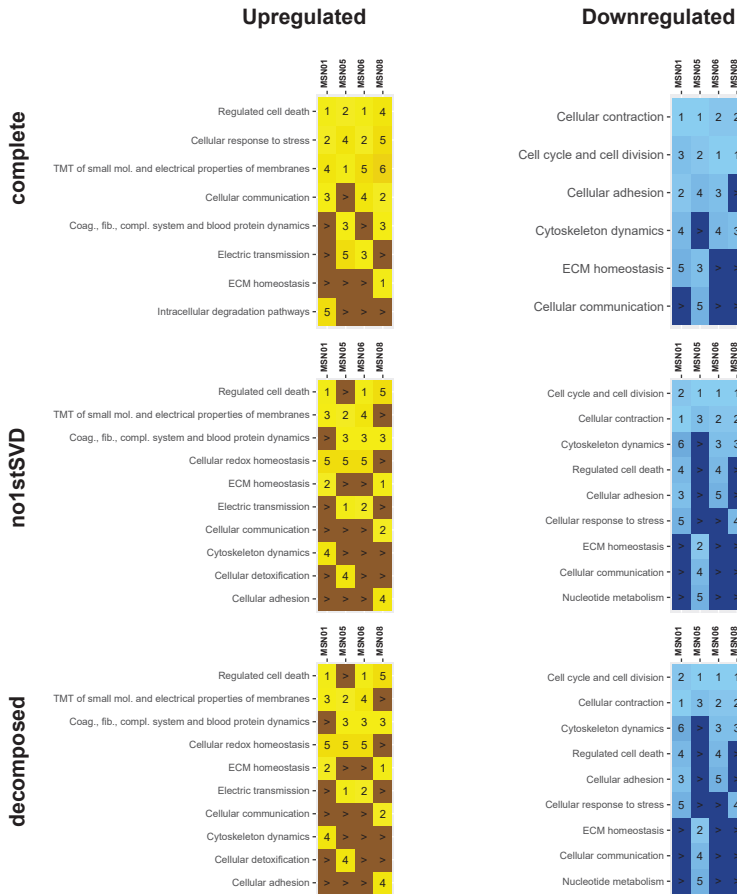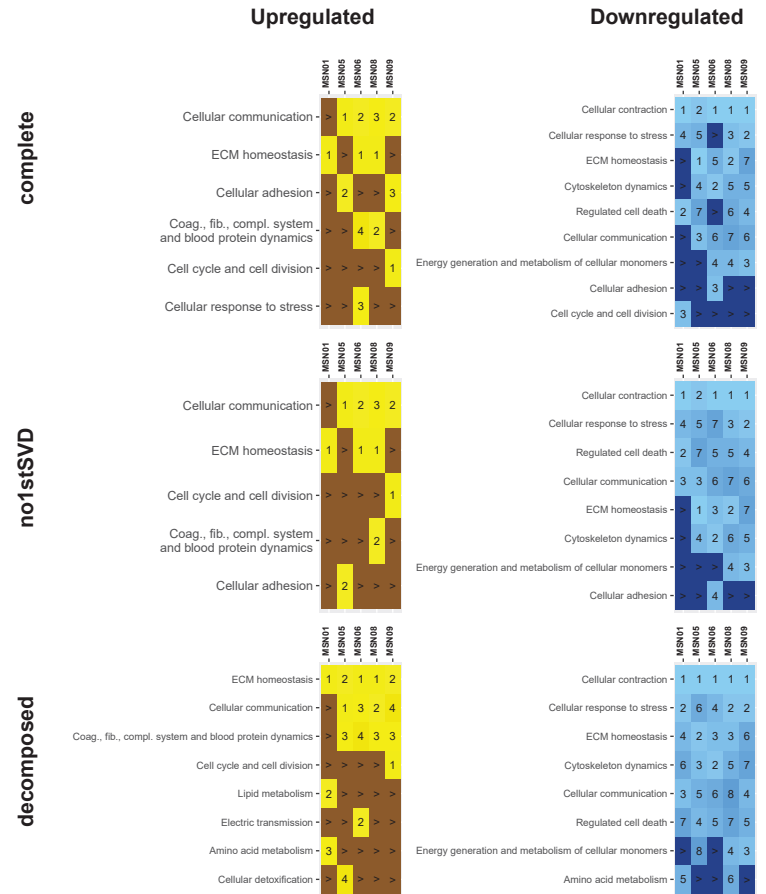

**MBCOL1  
dobutamine  
(is c.toxic: nd)**

**MBCOL1  
flecainide  
(is c.toxic: nd)**

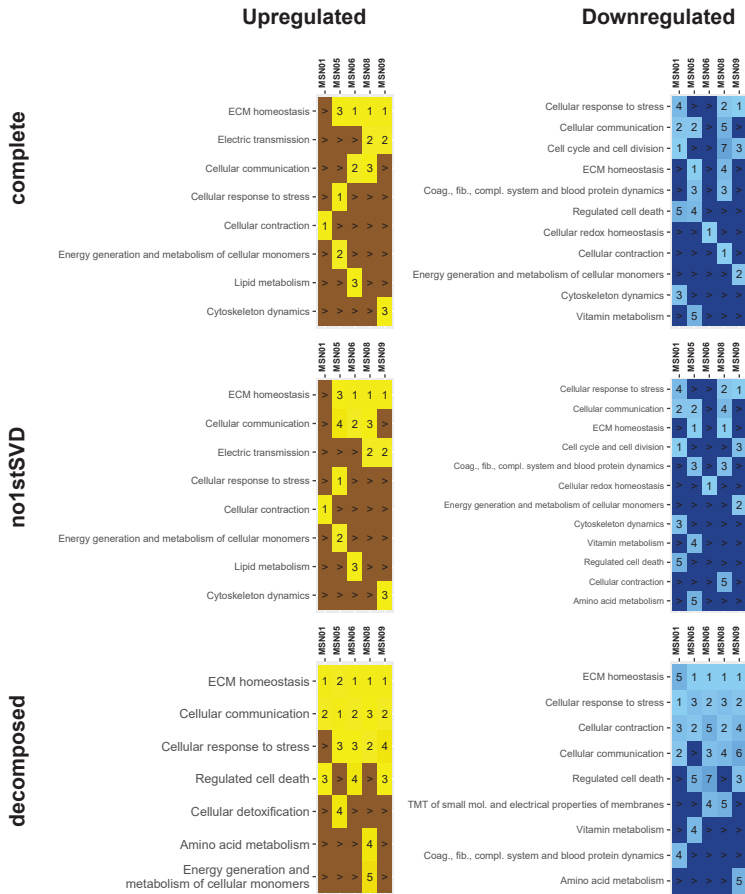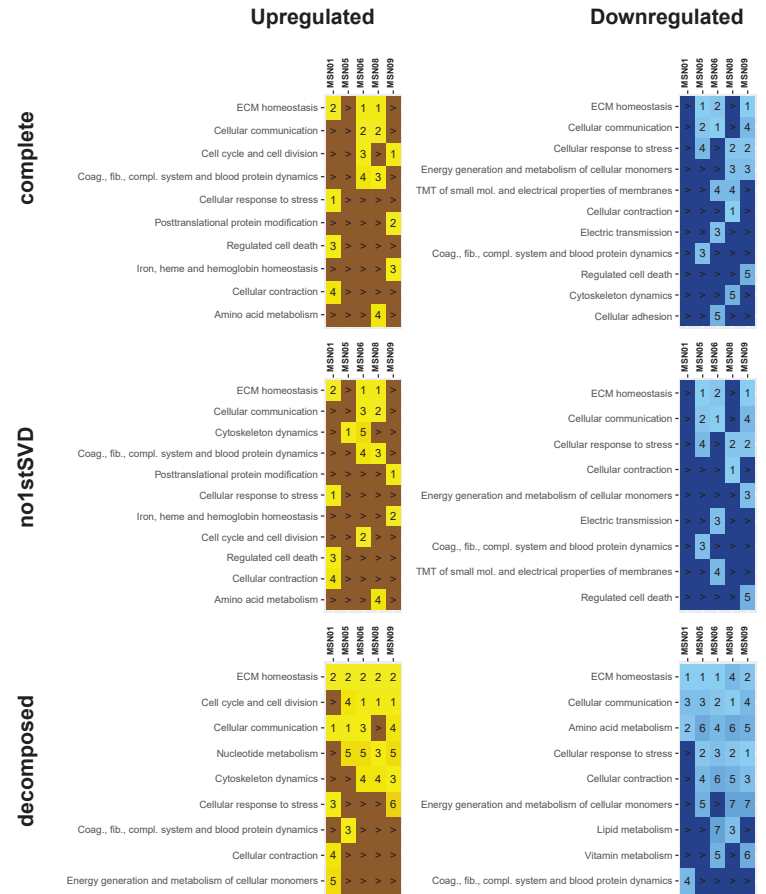

**MBCOL1  
isoprenaline  
(is c.toxic: nd)**

**MBCOL1  
milrinone  
(is c.toxic: nd)**

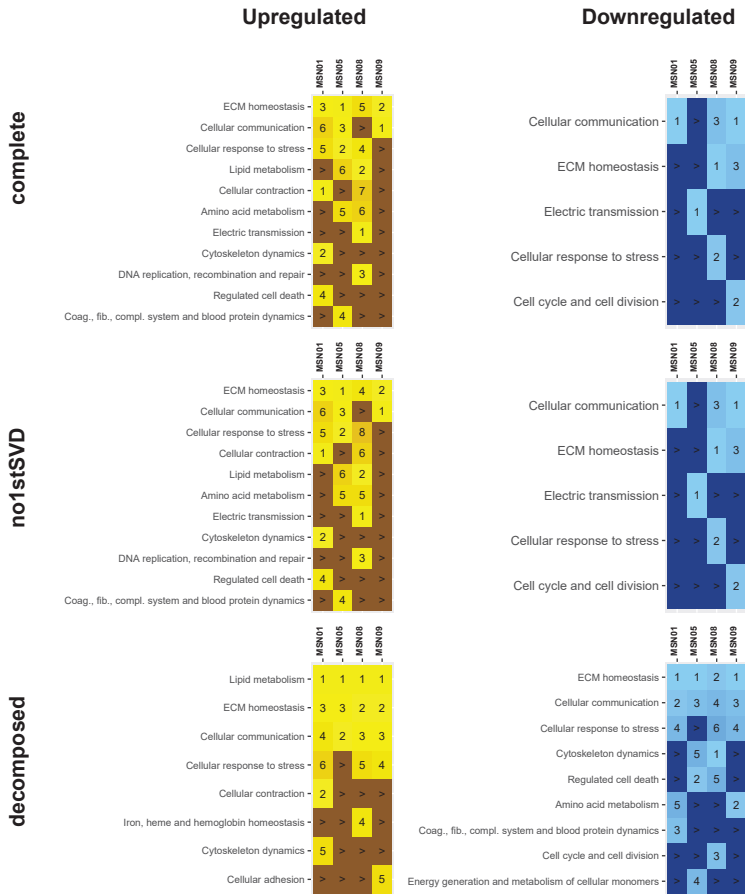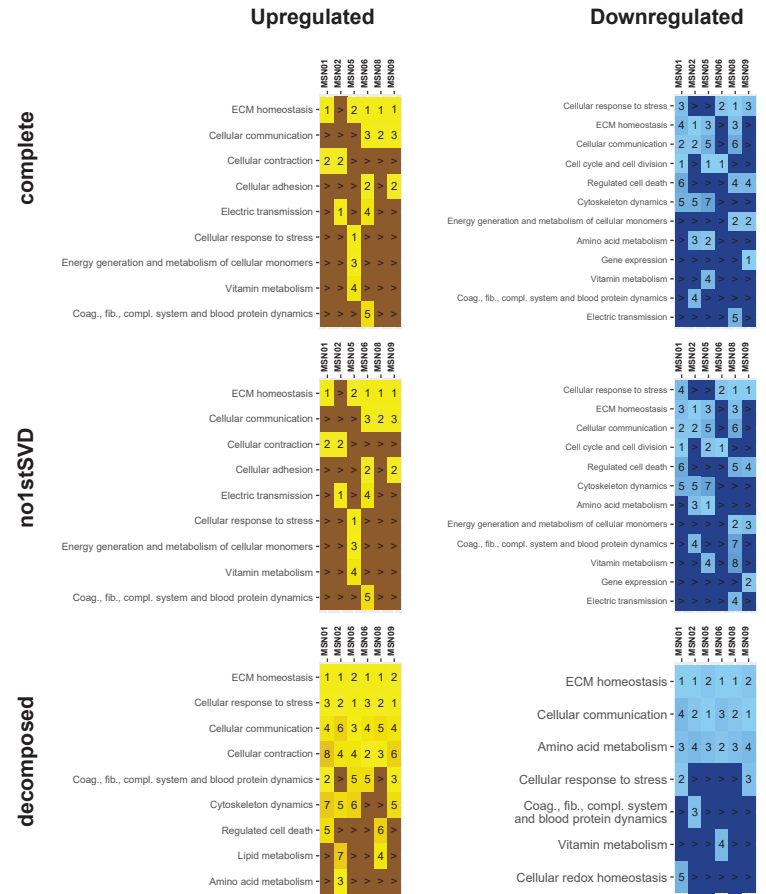

**MBCOL1  
phenylephrine  
(is c.toxic: nd)**

**MBCOL1  
verapamil  
(is c.toxic: nd)**

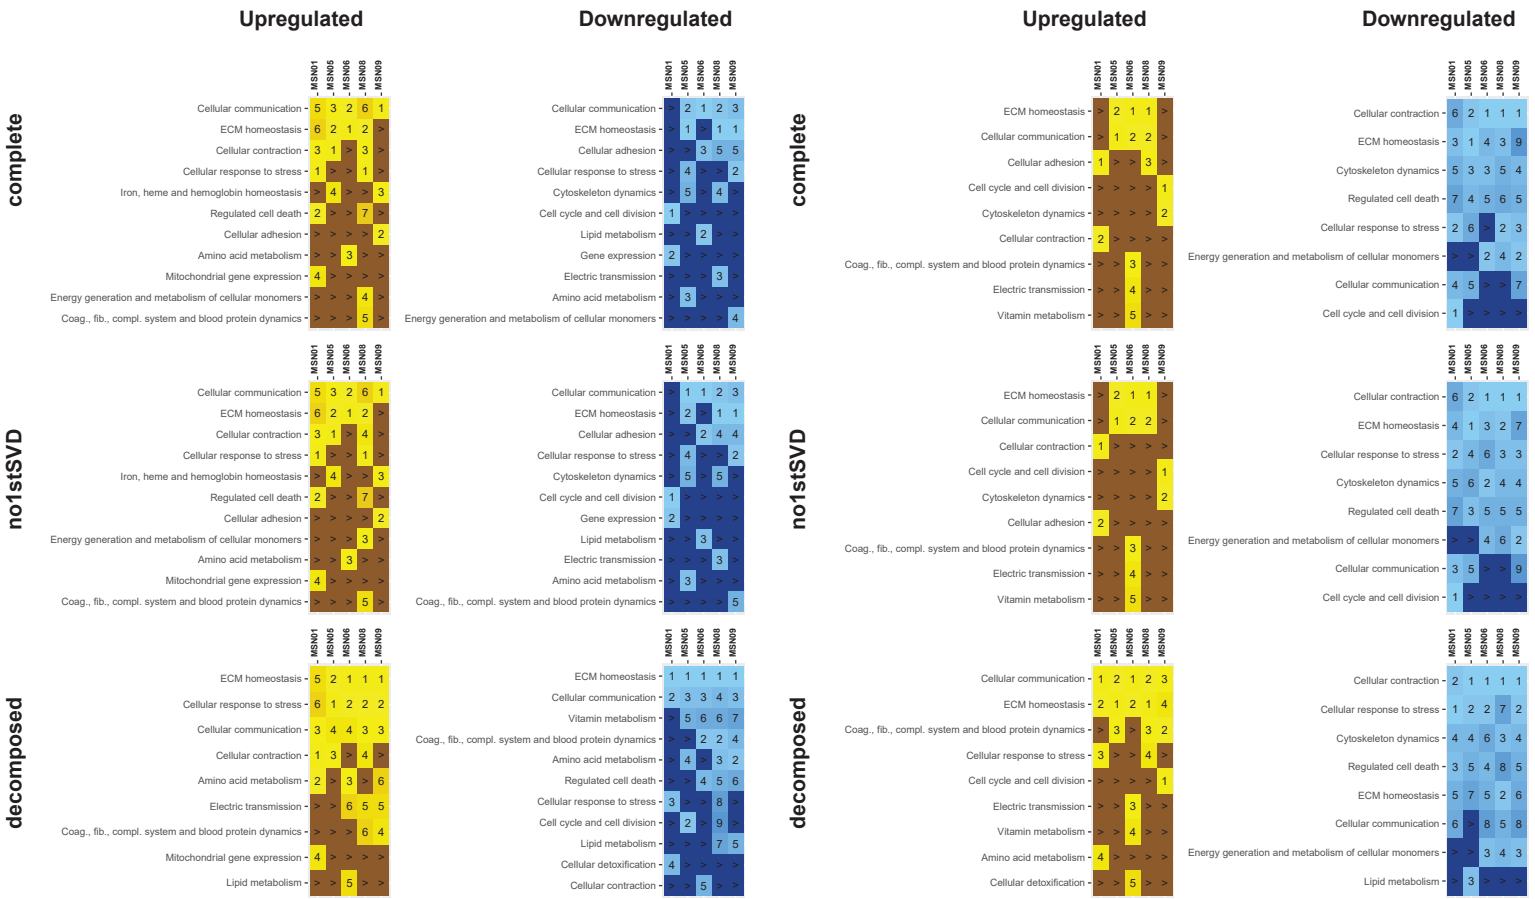

**MBCOL1  
azacitidine  
(is c.toxic: nd)**

**MBCOL1  
bortezomib  
(is c.toxic: yes)**

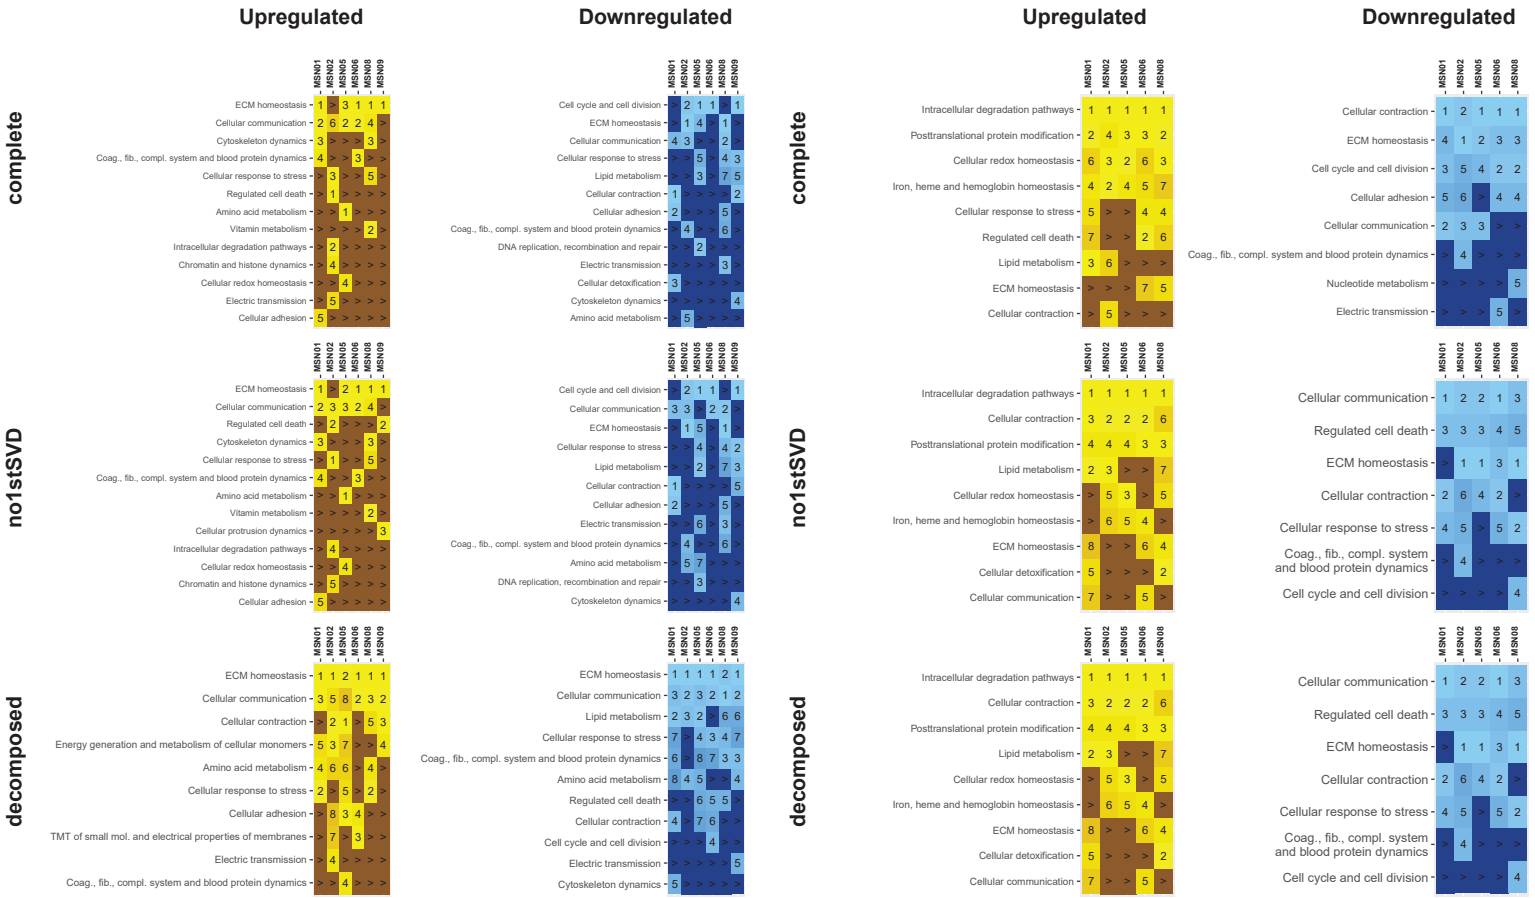

**MBCOL1  
carfilzomib  
(is c.toxic: yes)**

**MBCOL1  
cyclosporine  
(is c.toxic: nd)**

**Upregulated**

**Downregulated**

**Upregulated**

**Downregulated**

**complete**

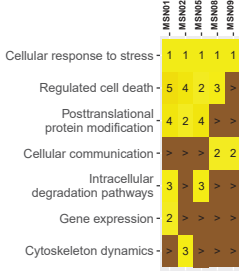

Energy generation and metabolism of cellular monomers

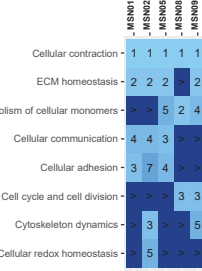

**complete**

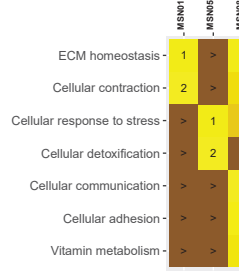

Coag., fib., compl. system and blood protein dynamics

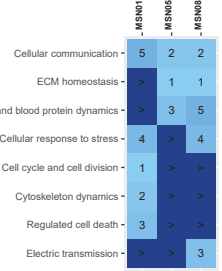

**no1stSVD**

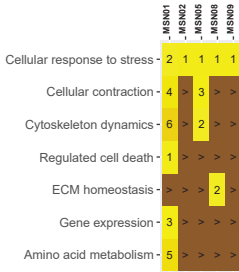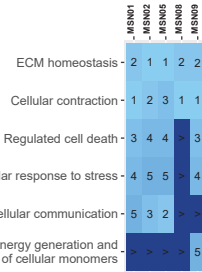

**no1stSVD**

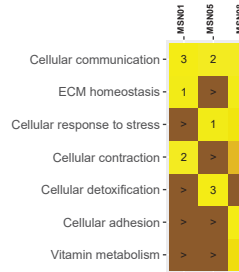

Coag., fib., compl. system and blood protein dynamics

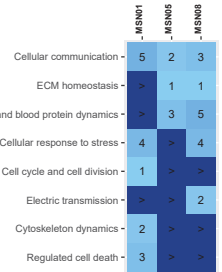

**decomposed**

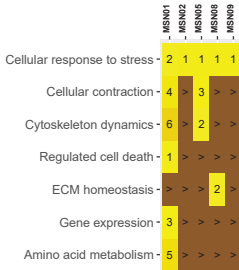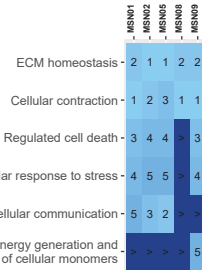

**decomposed**

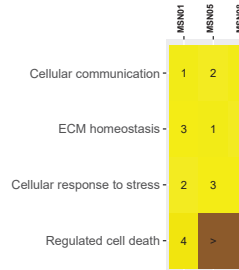

Coag., fib., compl. system and blood protein dynamics

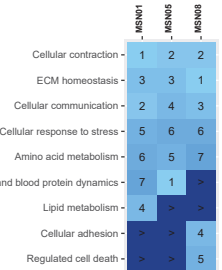

**MBCOL1  
decitabine  
(is c.toxic: nd)**

**MBCOL1  
delavirdine  
(is c.toxic: nd)**

**Upregulated**

**Downregulated**

**Upregulated**

**Downregulated**

**complete**

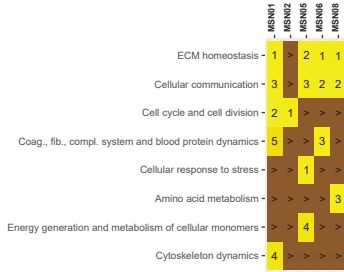

Energy generation and metabolism of cellular monomers

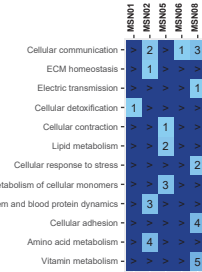

**complete**

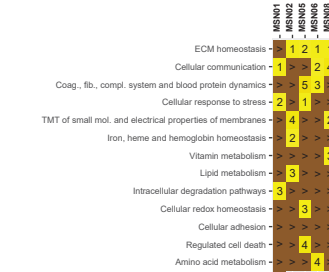

Coag., fib., compl. system and blood protein dynamics

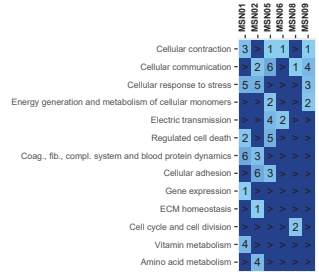

**no1stSVD**

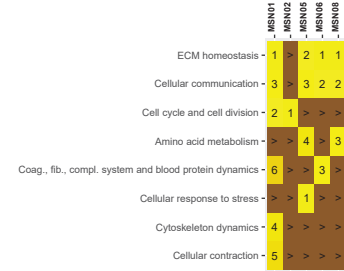

Energy generation and metabolism of cellular monomers

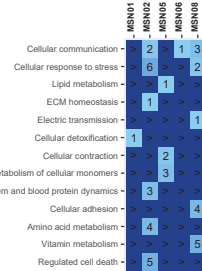

**no1stSVD**

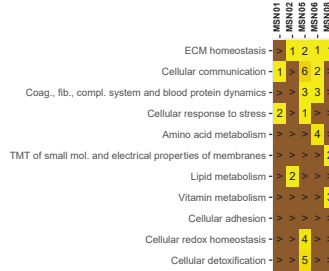

Coag., fib., compl. system and blood protein dynamics

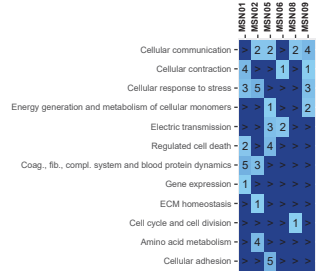

**MBCOL1  
diclofenac  
(is c.toxic: nd)**

**MBCOL1  
endothelin-1  
(is c.toxic: nd)**

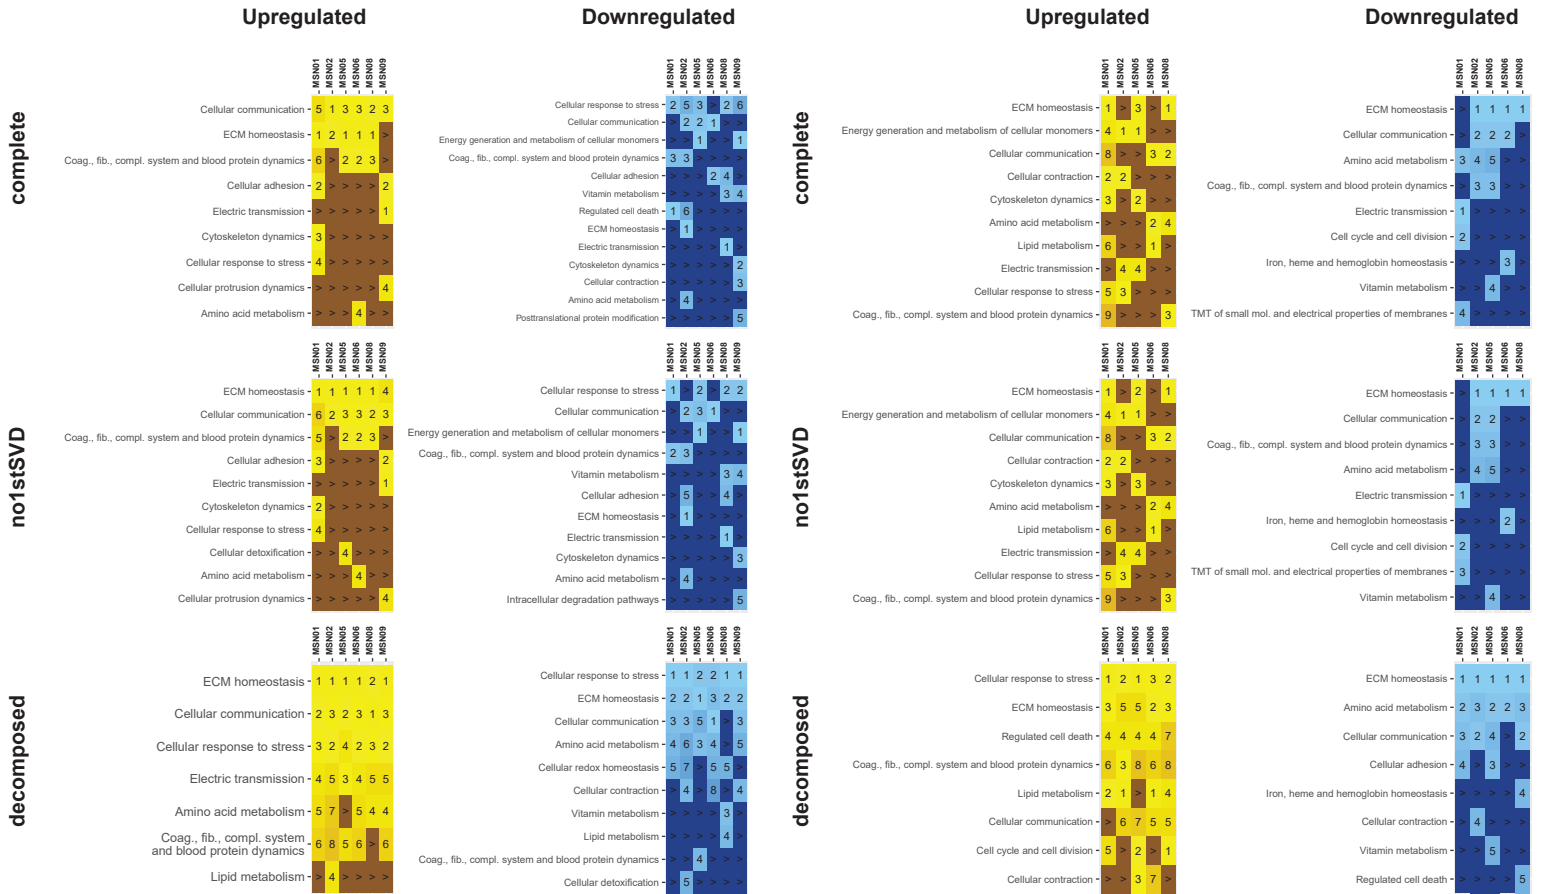

**MBCOL1  
estradiol  
(is c.toxic: nd)**

**MBCOL1  
insulin-like growth factor 1  
(is c.toxic: nd)**

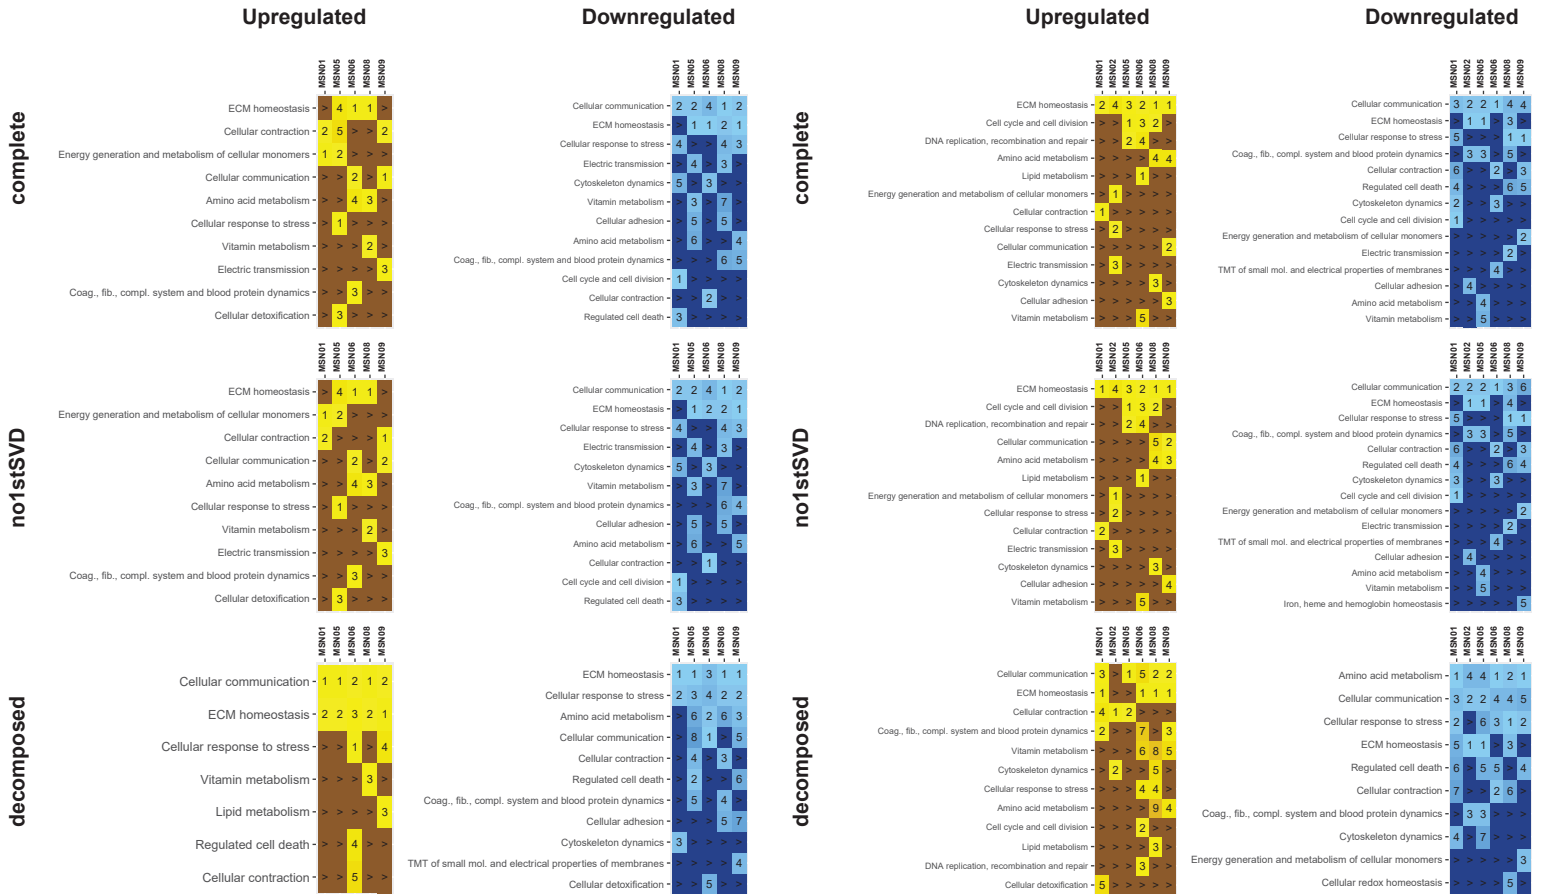

**MBCOL1  
olmesartan  
(is c.toxic: nd)**

**MBCOL1  
pioglitazone  
(is c.toxic: nd)**

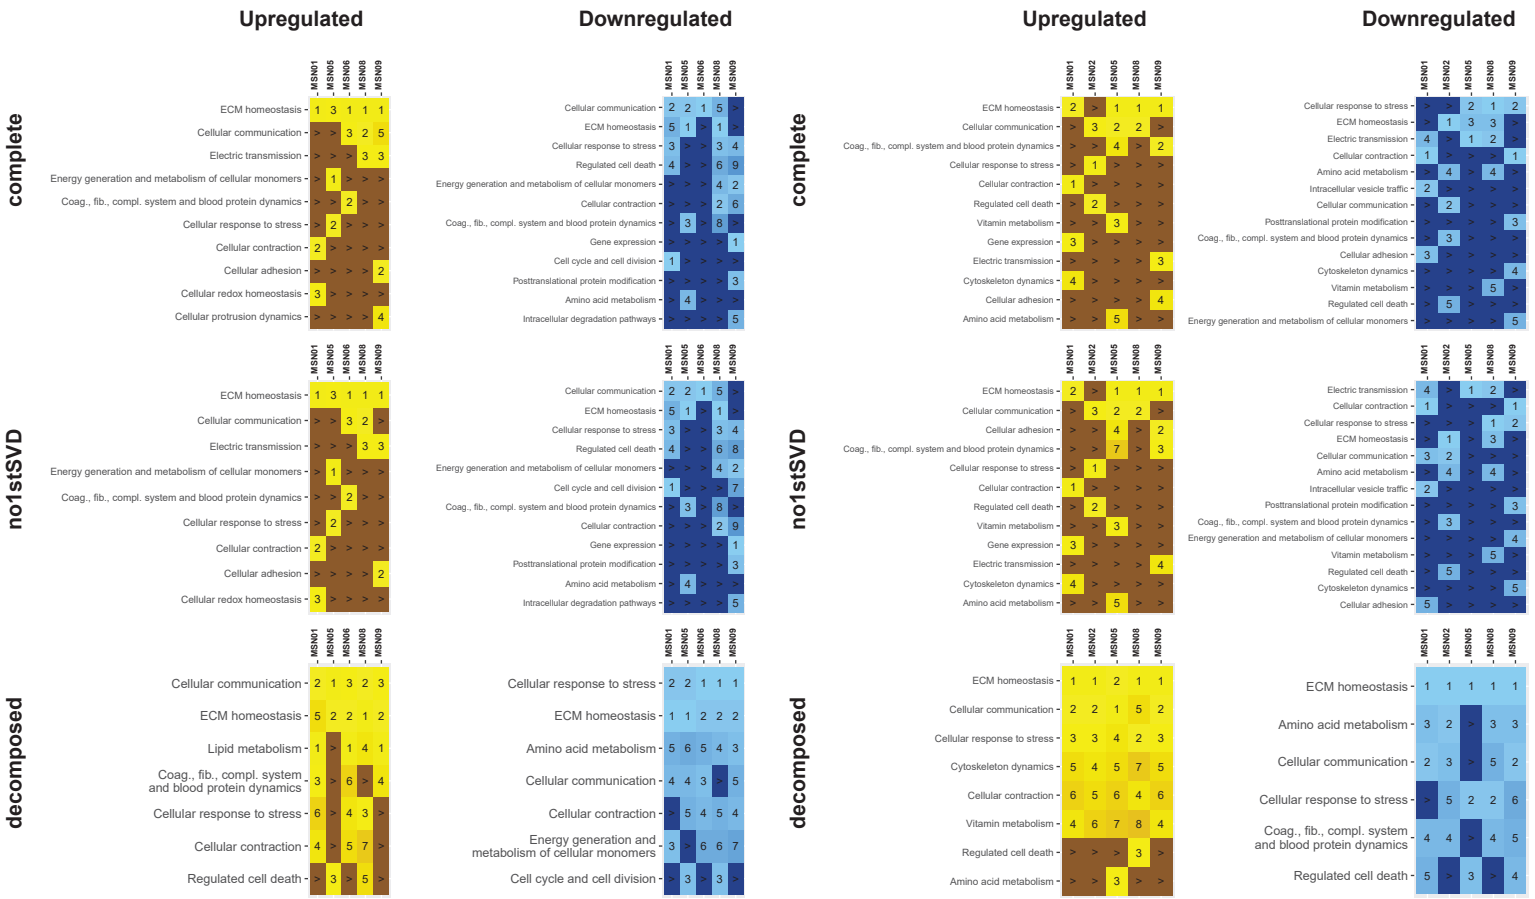

**MBCOL1  
prednisolone  
(is c.toxic: nd)**

**MBCOL1  
rosiglitazone  
(is c.toxic: nd)**

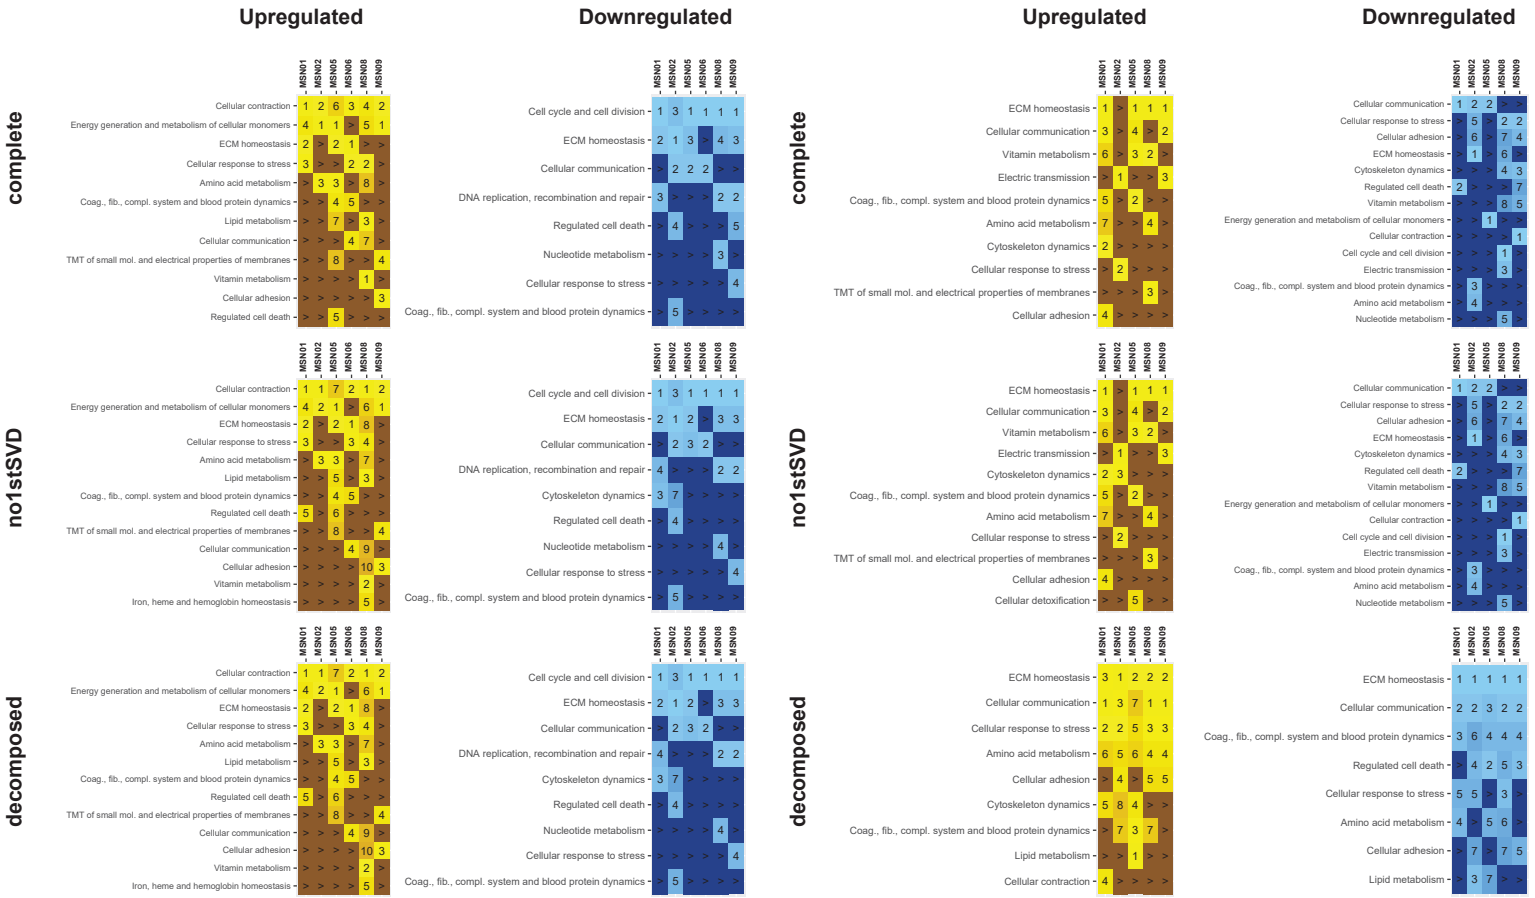

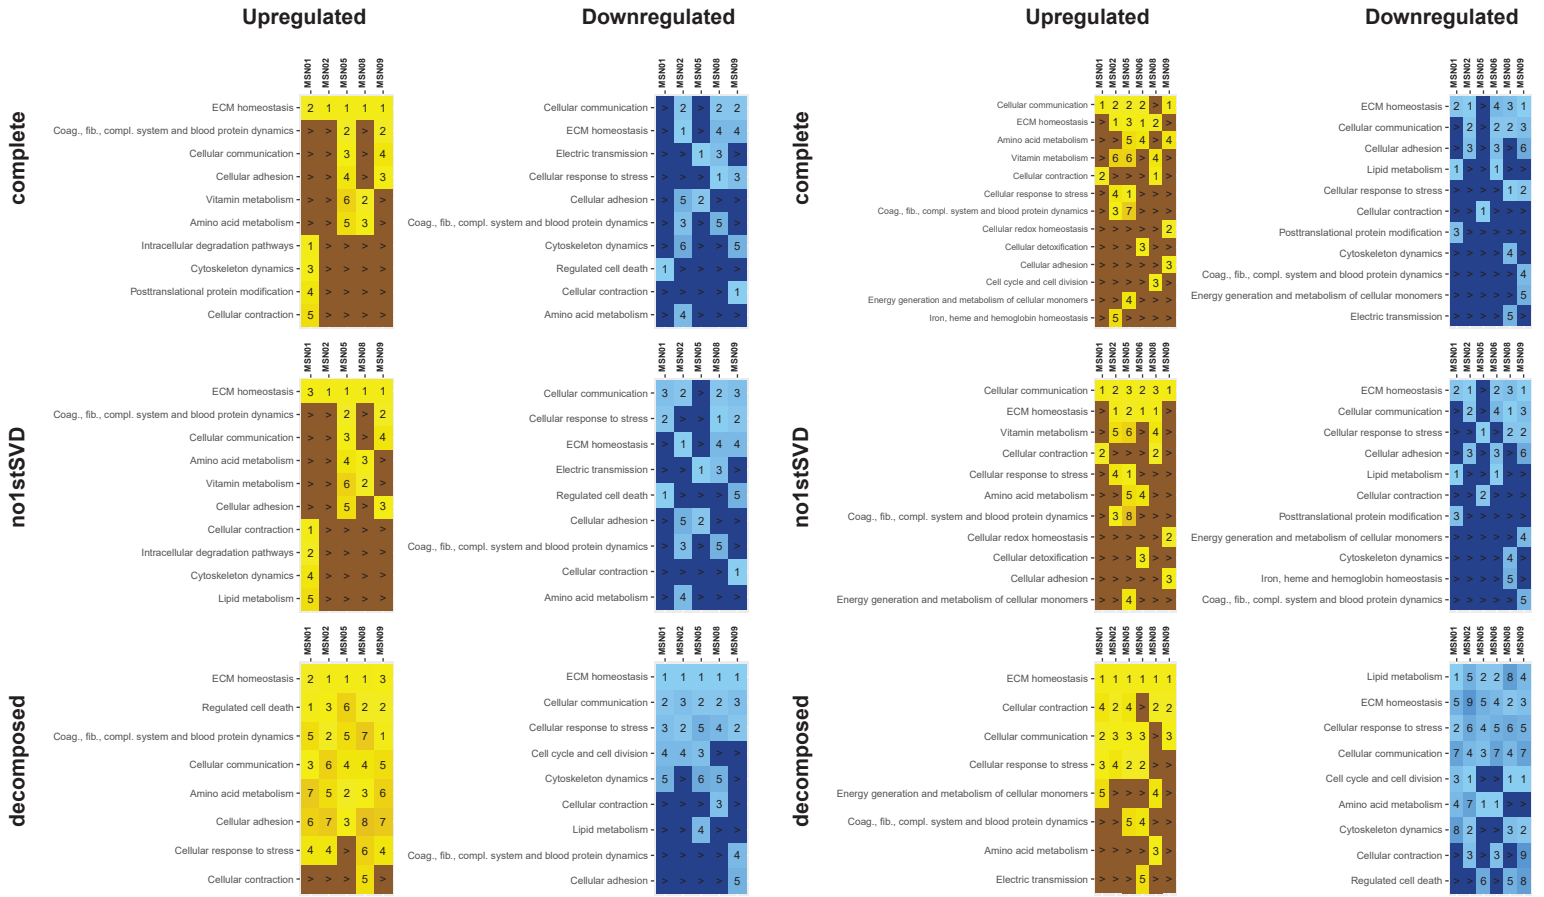

**MBCOL2  
afatinib**  
(is c.toxic: no)

**MBCOL2  
axitinib**  
(is c.toxic: no)

**Upregulated**

**Downregulated**

**Upregulated**

**Downregulated**

**complete**

**complete**

**complete**

**no1stSD**

**no1stSD**

**decomposed**

**decomposed**

**decomposed**

**MBCOL2  
bosutinib**  
(is c.toxic: no)

**MBCOL2  
cabozantinib**  
(is c.toxic: no)

**Upregulated**

**Downregulated**

**Upregulated**

**Downregulated**

**complete**

**complete**

**complete**

**no1stSD**

**no1stSD**

**decomposed**

**decomposed**

**decomposed**



MBCOL2  
ceritinib  
(is c.toxic: no)

Upregulated

Downregulated

complete

|                                                                  | MSN01 | MSN05 | MSN06 | MSN08 | MSN09 |
|------------------------------------------------------------------|-------|-------|-------|-------|-------|
| ECM breakdown                                                    | 1     | 3     | 2     | 3     | 4     |
| Apoptosis                                                        | 7     | 1     | 3     | 2     | 4     |
| Signaling pathways involved in glucose and lipid homeostasis     | 3     | 9     | >     | 1     |       |
| Interferon signaling                                             | 1     | 2     | 12    | >     | 1     |
| Sig. pathways that control cell prol. and diff.                  | 3     | 7     | 6     | >     | 1     |
| Pattern recognition signaling                                    | 4     | 6     | >     | 14    | 3     |
| Signaling pathways involved in hematopoiesis                     | 10    | 13    | 2     | >     | 1     |
| Actin filament dynamics                                          | 9     | 3     | 12    | >     | 5     |
| Elastogenesis                                                    | 13    | 13    | 4     | >     | 1     |
| Matricellular protein signaling                                  | >     | 4     | 2     | >     | 1     |
| Collagen biosynthesis                                            | >     | 5     | 1     | >     | 1     |
| Cellular response to hypoxia                                     | 3     | 4     | >     | >     | 1     |
| Metabolism and transport of cholesterol, steroids and bile acids | >     | 1     | >     | 7     | 1     |
| Metabolism of non-essential amino acids                          | >     | 2     | >     | >     | 1     |
| Complement pathway and regulation                                | >     | 7     | 5     | >     | 1     |
| Cellular response to oxidative stress                            | 5     | >     | >     | >     | 1     |
| Antigen presentation                                             | 5     | >     | >     | >     | 1     |

|                                                           | MSN01 | MSN05 | MSN06 | MSN08 | MSN09 |
|-----------------------------------------------------------|-------|-------|-------|-------|-------|
| Chromosome segregation by mitotic spindle                 | 1     | 1     | 1     | 1     | 1     |
| Mitotic cell cycle checkpoints                            | 2     | 4     | 4     | 2     | 2     |
| Centrosome cycle                                          | 3     | 3     | 3     | 4     | 4     |
| Cytokinesis                                               | 4     | 5     | 2     | 5     | 3     |
| Microtubule dynamics                                      | 7     | 10    | 5     | >     | 8     |
| Eukaryotic DNA replication                                | >     | 2     | >     | >     | 5     |
| Carbohydrate metabolism and transport                     | >     | >     | >     | >     | 4     |
| Cardiomyocyte action potential generation and propagation | >     | >     | >     | >     | >     |

no1stSVD

|                                                                  | MSN01 | MSN05 | MSN06 | MSN08 | MSN09 |
|------------------------------------------------------------------|-------|-------|-------|-------|-------|
| ECM breakdown                                                    | 6     | 3     | 3     | 5     | 5     |
| Pattern recognition signaling                                    | 4     | 6     | 13    | 15    | 2     |
| Sig. pathways that control cell prol. and diff.                  | 2     | 7     | 3     | >     | 1     |
| Signaling pathways involved in glucose and lipid homeostasis     | 4     | 7     | 1     | >     | 1     |
| Collagen biosynthesis                                            | 10    | 9     | 5     | >     | 1     |
| Matricellular protein signaling                                  | 11    | 4     | 2     | >     | 1     |
| Interferon signaling                                             | 8     | 7     | >     | 4     | 1     |
| Apoptosis                                                        | 12    | 8     | 4     | >     | 1     |
| Elastogenesis                                                    | >     | 12    | 14    | 2     | 1     |
| Signaling pathways involved in hematopoiesis                     | >     | 1     | >     | 12    | 14    |
| Actin filament dynamics                                          | 1     | 1     | >     | >     | 1     |
| Metabolism and transport of cholesterol, steroids and bile acids | >     | 1     | >     | 7     | 1     |
| Cellular response to hypoxia                                     | 7     | 2     | >     | >     | 1     |
| Epidermal growth factor family signaling                         | >     | 3     | 11    | >     | 1     |
| Metabolism of non-essential amino acids                          | >     | 2     | >     | 13    | 1     |
| Complement pathway and regulation                                | >     | 3     | 10    | >     | 1     |
| Cellular response to oxidative stress                            | >     | 5     | >     | >     | 1     |
| Metabolism of tryptophan products                                | 5     | 5     | >     | >     | 1     |
| Antigen presentation                                             | 5     | >     | >     | >     | 1     |

|                                                           | MSN01 | MSN05 | MSN06 | MSN08 | MSN09 |
|-----------------------------------------------------------|-------|-------|-------|-------|-------|
| Chromosome segregation by mitotic spindle                 | 1     | 1     | 1     | 1     | 1     |
| Mitotic cell cycle checkpoints                            | 2     | 4     | 4     | >     | 2     |
| Centrosome cycle                                          | 4     | 3     | 3     | >     | 3     |
| Cytokinesis                                               | 3     | 5     | 2     | >     | 4     |
| Microtubule dynamics                                      | 6     | 6     | 5     | >     | 8     |
| Eukaryotic DNA replication                                | >     | 2     | >     | >     | 7     |
| Carbohydrate metabolism and transport                     | >     | >     | >     | >     | 6     |
| Signaling pathways regulating water homeostasis           | >     | >     | >     | >     | 3     |
| Cellular response to hypoxia                              | >     | >     | >     | >     | 5     |
| Cardiomyocyte action potential generation and propagation | >     | >     | >     | >     | >     |

decomposed

|                                                                  | MSN01 | MSN05 | MSN06 | MSN08 | MSN09 |
|------------------------------------------------------------------|-------|-------|-------|-------|-------|
| Sig. pathways that control cell prol. and diff.                  | 9     | 11    | 9     | 7     | 1     |
| Signaling pathways involved in hematopoiesis                     | 14    | 5     | 11    | 10    | 2     |
| ECM breakdown                                                    | 6     | 2     | 4     | 6     | 1     |
| Interferon signaling                                             | 3     | 1     | 10    | >     | 7     |
| Complement pathway and regulation                                | 11    | 4     | 5     | 9     | 1     |
| Epidermal growth factor family signaling                         | 13    | 3     | 6     | 4     | 1     |
| Metabolism and transport of cholesterol, steroids and bile acids | 13    | 12    | 1     | 1     | 5     |
| Matricellular protein signaling                                  | 1     | 8     | 2     | >     | 8     |
| Cellular response to hypoxia                                     | 7     | 2     | >     | >     | 8     |
| Elastogenesis                                                    | 4     | >     | 16    | 3     | 1     |
| Collagen biosynthesis                                            | >     | 3     | 1     | >     | 1     |
| Metabolism of non-essential amino acids                          | >     | 2     | 5     | >     | 1     |
| Apoptosis                                                        | 12    | 4     | >     | >     | 3     |
| Myofibril formation and organization                             | >     | >     | >     | >     | 3     |
| Cellular response to oxidative stress                            | 5     | >     | >     | >     | >     |

|                                           | MSN01 | MSN05 | MSN06 | MSN08 | MSN09 |
|-------------------------------------------|-------|-------|-------|-------|-------|
| Chromosome segregation by mitotic spindle | 1     | 1     | 1     | 1     | 1     |
| Mitotic cell cycle checkpoints            | 3     | 3     | 4     | 3     | 3     |
| Centrosome cycle                          | 5     | 4     | 3     | 2     | 2     |
| Cytokinesis                               | 2     | 5     | 2     | 4     | 4     |
| Eukaryotic DNA replication                | 4     | 2     | >     | 5     | 1     |
| Heme, hemoglobin and bilirubin metabolism | >     | >     | >     | >     | 5     |

complete

|                                                                  | MSN01 | MSN05 | MSN06 | MSN08 | MSN09 |
|------------------------------------------------------------------|-------|-------|-------|-------|-------|
| Metabolism of non-essential amino acids                          | 1     | 1     | 2     | 1     | 1     |
| Cellular response to oxidative stress                            | 6     | 2     | 4     | 10    | 5     |
| Signaling pathways involved in hematopoiesis                     | 8     | 5     | 9     | 3     | 1     |
| Apoptosis                                                        | 3     | 6     | 12    | 9     | 1     |
| Sig. pathways that control cell prol. and diff.                  | 8     | 8     | >     | 2     | 1     |
| Matricellular protein signaling                                  | 7     | 5     | 8     | >     | 1     |
| PT protein modification and QC during secretory pathway          | 2     | 1     | >     | 1     | 1     |
| Metabolism and transport of cholesterol, steroids and bile acids | 3     | 3     | >     | 2     | 1     |
| ECM breakdown                                                    | 4     | >     | 3     | >     | 1     |
| Glycosaminoglycan metabolism                                     | 10    | >     | 6     | 4     | 1     |
| Collagen biosynthesis                                            | 3     | 7     | >     | >     | 1     |
| Intracellular common signaling cascades of multiple pathways     | 5     | 10    | >     | >     | 1     |
| Signaling by extracellular matrix components                     | >     | 4     | >     | >     | 1     |
| Basement membrane dynamics                                       | 4     | >     | >     | >     | 1     |
| Neuronal signaling pathways                                      | >     | 5     | >     | >     | 1     |

|                                                           | MSN01 | MSN05 | MSN06 | MSN08 | MSN09 |
|-----------------------------------------------------------|-------|-------|-------|-------|-------|
| Myofibril formation and organization                      | 3     | 2     | 1     | 6     | 3     |
| Metabolism of fat-soluble vitamins                        | 9     | 6     | 4     | 5     | 1     |
| Cardiomyocyte action potential generation and propagation | 4     | 2     | 5     | >     | 1     |
| Cellular response to hypoxia                              | >     | 2     | 1     | >     | 1     |
| Apoptosis                                                 | 5     | >     | 3     | >     | 4     |
| Matricellular protein signaling                           | 3     | 7     | 7     | >     | 3     |
| Collagen biosynthesis                                     | 2     | 7     | 3     | >     | 1     |
| ECM breakdown                                             | 3     | 9     | 4     | >     | 1     |
| Centrosome cycle                                          | 10    | 4     | >     | >     | 1     |
| Epidermal growth factor family signaling                  | 1     | 1     | >     | >     | 1     |
| Complement pathway and regulation                         | >     | 1     | >     | >     | 1     |
| Chromosome segregation by mitotic spindle                 | 1     | 1     | >     | >     | 1     |
| Eukaryotic DNA replication                                | 1     | 2     | >     | >     | 1     |
| Carbohydrate metabolism and transport                     | >     | 3     | >     | >     | 2     |
| Neuronal action potential generation and propagation      | >     | 3     | >     | >     | 1     |
| Mitotic cell cycle checkpoints                            | 1     | 3     | >     | >     | 1     |
| Metabolism of tryptophan products                         | 3     | 5     | >     | >     | 1     |
| Cytokinesis                                               | 5     | >     | >     | >     | 1     |

no1stSVD

|                                                                  | MSN01 | MSN05 | MSN06 | MSN08 | MSN09 |
|------------------------------------------------------------------|-------|-------|-------|-------|-------|
| Metabolism of non-essential amino acids                          | 1     | 1     | 2     | 1     | 1     |
| Cellular response to oxidative stress                            | 8     | 2     | 6     | 11    | 4     |
| Signaling pathways involved in hematopoiesis                     | 10    | 5     | 8     | 3     | 1     |
| ECM breakdown                                                    | 4     | 4     | >     | 6     | 1     |
| Apoptosis                                                        | 3     | 5     | >     | 9     | 1     |
| Matricellular protein signaling                                  | 7     | 4     | 8     | >     | 1     |
| Sig. pathways that control cell prol. and diff.                  | 9     | 11    | >     | 2     | 1     |
| Collagen biosynthesis                                            | 3     | 7     | >     | 12    | 1     |
| PT protein modification and QC during secretory pathway          | 2     | 1     | >     | 1     | 1     |
| Metabolism and transport of cholesterol, steroids and bile acids | 3     | 3     | >     | 2     | 1     |
| Glycosaminoglycan metabolism                                     | >     | 6     | 3     | >     | 1     |
| Actin filament dynamics                                          | 5     | >     | >     | 5     | 10    |
| Neuronal signaling pathways                                      | >     | 5     | >     | >     | 1     |
| Signaling by extracellular matrix components                     | >     | 4     | >     | >     | 1     |

|                                                           | MSN01 | MSN05 | MSN06 | MSN08 | MSN09 |
|-----------------------------------------------------------|-------|-------|-------|-------|-------|
| Myofibril formation and organization                      | 3     | 2     | 6     | 4     | 1     |
| Metabolism of fat-soluble vitamins                        | 9     | 6     | 4     | 5     | 1     |
| Cardiomyocyte action potential generation and propagation | 4     | 1     | 5     | >     | 1     |
| Cellular response to hypoxia                              | >     | 2     | 1     | >     | 1     |
| Apoptosis                                                 | 5     | >     | 3     | >     | 3     |
| Matricellular protein signaling                           | 2     | 7     | 7     | >     | 3     |
| Collagen biosynthesis                                     | 2     | 7     | 3     | >     | 1     |
| ECM breakdown                                             | 3     | 10    | 4     | >     | 1     |
| Epidermal growth factor family signaling                  | 1     | 1     | >     | >     | 1     |
| Complement pathway and regulation                         | >     | 1     | >     | >     | 1     |
| Chromosome segregation by mitotic spindle                 | 1     | 1     | >     | >     | 1     |
| Eukaryotic DNA replication                                | 1     | 2     | >     | >     | 1     |
| Carbohydrate metabolism and transport                     | >     | 3     | >     | >     | 2     |
| Neuronal action potential generation and propagation      | >     | 3     | >     | >     | 1     |
| Mitotic cell cycle checkpoints                            | 1     | 3     | >     | >     | 1     |
| Metabolism of tryptophan products                         | 3     | 5     | >     | >     | 1     |
| Cytokinesis                                               | 5     | >     | >     | >     | 1     |

decomposed

|                                                                  | MSN01 | MSN05 | MSN06 | MSN08 | MSN09 |
|------------------------------------------------------------------|-------|-------|-------|-------|-------|
| Metabolism of non-essential amino acids                          | 1     | 1     | 2     | 1     | 1     |
| Cellular response to oxidative stress                            | 8     | 2     | 6     | 11    | 4     |
| Signaling pathways involved in hematopoiesis                     | 10    | 5     | 8     | 3     | 1     |
| ECM breakdown                                                    | 4     | 4     | >     | 6     | 1     |
| Apoptosis                                                        | 3     | 5     | >     | 9     | 1     |
| Matricellular protein signaling                                  | 7     | 4     | 8     | >     | 1     |
| Sig. pathways that control cell prol. and diff.                  | 9     | 11    | >     | 2     | 1     |
| Collagen biosynthesis                                            | 3     | 7     | >     | 12    | 1     |
| PT protein modification and QC during secretory pathway          | 2     | 1     | >     | 1     | 1     |
| Metabolism and transport of cholesterol, steroids and bile acids | 3     | 3     | >     | 2     | 1     |
| Glycosaminoglycan metabolism                                     | >     | 6     | 3     | >     | 1     |
| Actin filament dynamics                                          | 5     | >     | >     | 5     | 10    |
| Neuronal signaling pathways                                      | >     | 5     | >     | >     | 1     |
| Signaling by extracellular matrix components                     | >     | 4     | >     | >     | 1     |

|                                                           | MSN01 | MSN05 | MSN06 | MSN08 | MSN09 |
|-----------------------------------------------------------|-------|-------|-------|-------|-------|
| Myofibril formation and organization                      | 3     | 2     | 6     | 4     | 1     |
| Metabolism of fat-soluble vitamins                        | 9     | 6     | 4     | 5     | 1     |
| Cardiomyocyte action potential generation and propagation | 4     | 1     | 5     | >     | 1     |
| Cellular response to hypoxia                              | >     | 2     | 1     | >     | 1     |
| Apoptosis                                                 | 5     | >     | 3     | >     | 3     |
| Matricellular protein signaling                           | 2     | 7     | 7     | >     | 3     |
| Collagen biosynthesis                                     | 2     | 7     | 3     | >     | 1     |
| ECM breakdown                                             | 3     | 10    | 4     | >     | 1     |
| Epidermal growth factor family signaling                  | 1     | 1     | >     | >     | 1     |
| Complement pathway and regulation                         | >     | 1     | >     | >     | 1     |
| Chromosome segregation by mitotic spindle                 | 1     | 1     | >     | >     | 1     |
| Eukaryotic DNA replication                                | 1     | 2     | >     | >     | 1     |
| Carbohydrate metabolism and transport                     | >     | 3     | >     | >     | 2     |
| Neuronal action potential generation and propagation      | >     | 3     | >     | >     | 1     |
| Mitotic cell cycle checkpoints                            | 1     | 3     | >     | >     | 1     |
| Metabolism of tryptophan products                         | 3     | 5     | >     | >     | 1     |
| Cytokinesis                                               | 5     | >     | >     | >     | 1     |

MBCOL2  
crizotinib  
(is c.toxic: no)

Upregulated

Downregulated

complete

|                                                              | MSN01 | MSN05 | MSN06 | MSN08 | MSN09 |
|--------------------------------------------------------------|-------|-------|-------|-------|-------|
| Matricellular protein signaling                              | 1     | 2     | 3     | 10    | 1     |
| Collagen biosynthesis                                        | >     | 1     | 2     | >     | 1     |
| Myofibril formation and organization                         | >     | 1     | 3     | >     | 1     |
| Cellular response to hypoxia                                 | >     | 7     | 3     | >     | 1     |
| Elastogenesis                                                | >     | 3     | 5     | >     | 1     |
| Signaling pathways involved in glucose and lipid homeostasis | >     | 1     | >     | 1     | 1     |
| ECM breakdown                                                | >     | 2     | >     | 1     | 1     |
| Metabolism of glutamate and histidine products               | 2     | >     | >     | >     | 1     |
| Ribonucleoprotein biosynthesis                               | >     | 2     | >     | >     | 1     |
| Cellular response to radiation                               | >     | 2     | >     | >     | 1     |
| Cellular antioxidant systems                                 | >     | 2     | >     | >     | 1     |
| Vesicle traffic between ER and Golgi                         | >     | 3     | >     | >     | 1     |
| Cortical cytoskeleton dynamics                               | 3     | >     | >     | >     | 1     |
| Metabolism of tryptophan products                            | >     | 4     | >     | >     | 1     |
| Epidermal growth factor family signaling                     | >     | 4     | >     | >     | 1     |
| Complement pathway and regulation                            | >     | 4     | >     | >     | 1     |
| Cellular response to oxidative stress                        | >     | 4     | >     | >     | 1     |
| Coagulation cascade and fibrinolysis                         | >     | 5     | >     | >     | 1     |
| Apoptosis                                                    | 5     | >     | >     | >     | 1     |

|                                                                  | MSN01 | MSN05 | MSN06 | MSN08 | MSN09 |
|------------------------------------------------------------------|-------|-------|-------|-------|-------|
| Signaling pathways involved in hematopoiesis                     | 5     | 9     | 1     | 8     | 1     |
| Matricellular protein signaling                                  | 3     | 4     | 1     | 3     | 1     |
| Collagen biosynthesis                                            | 1     | 7     | 3     | >     | 1     |
| Cytosolic intermediate filament and septin dynamics              | 6     | 10    | 5     | >     | 1     |
| Elastogenesis                                                    | 6     | 10    | 5     | >     | 1     |
| Sig. pathways that control cell prol. and diff.                  | 4     | 8     | 1     | >     | 1     |
| ECM breakdown                                                    | 2     | 7     | >     | >     | 1     |
| Metabolism and transport of cholesterol, steroids and bile acids | 3     | 1     | >     | 4     | 1     |
| Carbohydrate metabolism and transport                            | 1     | 2     | 4     | >     | 1     |
| TGF-beta superfamily signaling                                   | 2     | 1     | >     | >     | 1     |
| Cellular response to hypoxia                                     | 1     | 8     | >     | >     | 1     |
| Amyloid generation and aggregation                               | 1     | 8     | >     | >     | 1     |
| Basement membrane dynamics                                       | >     | 1     | >     | 3     | 1     |
| Chromosome segregation by mitotic spindle                        | >     | 1     | >     | >     | 1     |
| Neuronal signaling pathways                                      | >     | 2     | >     | >     | 1     |
| Cytokinesis                                                      | >     | 2     | >     | >     | 1     |
| Complement pathway and regulation                                | >     | 2     | >     | >     | 1     |
| Cardiomyocyte action potential generation and propagation        | >     | 5     | >     | >     | 1     |

no1stSVD

|                                                              | MSN01 | MSN05 | MSN06 | MSN08 | MSN09 |
|--------------------------------------------------------------|-------|-------|-------|-------|-------|
| Matricellular protein signaling                              | 1     | 2     | 3     | 10    | 1     |
| Myofibril formation and organization                         | >     | 1     | 3     | >     | 1     |
| Collagen biosynthesis                                        | >     | 1     | 2     | >     | 1     |
| Elastogenesis                                                | >     | 3     | 5     | >     | 1     |
| Signaling pathways involved in glucose and lipid homeostasis | >     | 1     | >     | 1     | 1     |
| ECM breakdown                                                | >     | 2     | >     | >     | 1     |
| Metabolism of glutamate and histidine products               | 2     | >     | >     | >     | 1     |
| Ribonucleoprotein biosynthesis                               | >     | 2     | >     | >     | 1     |
| Cellular response to radiation                               | >     | 2     | >     | >     | 1     |
| Cellular antioxidant systems                                 | >     | 2     | >     | >     | 1     |
| Vesicle traffic between ER and Golgi                         | >     | 3     | >     | >     | 1     |
| Cortical cytoskeleton dynamics                               | 3     | >     | >     | >     | 1     |
| Metabolism of tryptophan products                            | >     | 4     | >     | >     | 1     |
| Epidermal growth factor family signaling                     | >     | 4     | >     | ></   |       |

**MBCOL2  
erlotinib**  
(is c.toxic: no)

**Upregulated**

**Downregulated**

complete

|                                         | MSN01 | MSN05 | MSN06 | MSN09 |
|-----------------------------------------|-------|-------|-------|-------|
| Metabolism of non-essential amino acids | 1     | 1     | 4     | 1     |
| Cellular response to oxidative stress   | 2     | 3     | 1     | 2     |
| Apoptosis                               | 3     | 3     | 4     |       |
| Cellular response to hypoxia            | 7     | 2     | >     | >     |
| Cellular antioxidant systems            | >     | 6     | 3     | >     |
| Carbohydrate metabolism and transport   | 2     | >     | >     | >     |
| Iron homeostasis                        | 4     | >     | >     | >     |
| Basement membrane dynamics              | 4     | >     | >     | >     |
| Cellular response to radiation          | >     | 5     | >     | >     |
| Ammonium metabolism                     | >     | >     | 5     | >     |

|                                           | MSN01 | MSN05 | MSN06 | MSN09 |
|-------------------------------------------|-------|-------|-------|-------|
| Chromosome segregation by mitotic spindle | 1     | 1     | 2     | 1     |
| Eukaryotic DNA replication                | 6     | 7     | 1     | 2     |
| Cytokinesis                               | 2     | 5     | 4     | 5     |
| Mitotic cell cycle checkpoints            | 3     | 4     | 6     | 3     |
| Centrosome cycle                          | 4     | 9     | 5     | 4     |
| DNA interstrand cross-links repair        | 5     | 12    | 3     | 8     |
| Matricellular protein signaling           | 7     | 3     | 12    | 9     |
| Collagen biosynthesis                     | 2     | 9     | 16    | >     |

no1stSVD

|                                                            | MSN01 | MSN05 | MSN06 | MSN09 |
|------------------------------------------------------------|-------|-------|-------|-------|
| Metabolism of non-essential amino acids                    | 1     | 1     | 4     | 1     |
| Cellular response to oxidative stress                      | 5     | 3     | 1     | 2     |
| Apoptosis                                                  | 2     | 3     | 3     |       |
| Myofibril formation and organization                       | 3     | 5     | >     | >     |
| Cellular response to hypoxia                               | 7     | 2     | >     | >     |
| Carbohydrate metabolism and transport                      | 2     | >     | >     | >     |
| TM ion transport involved in membrane potential generation | >     | >     | 4     | >     |
| Basement membrane dynamics                                 | 4     | >     | >     | >     |
| Cellular antioxidant systems                               | >     | 5     | >     | >     |

|                                           | MSN01 | MSN05 | MSN06 | MSN09 |
|-------------------------------------------|-------|-------|-------|-------|
| Chromosome segregation by mitotic spindle | 1     | 1     | 2     | 1     |
| Mitotic cell cycle checkpoints            | 3     | 4     | 8     | 3     |
| Cytokinesis                               | 2     | 5     | 7     | 5     |
| Centrosome cycle                          | 4     | 9     | 5     | 4     |
| DNA interstrand cross-links repair        | 8     | 12    | 3     | 7     |
| Matricellular protein signaling           | 5     | 3     | 15    | 8     |
| Microtubule dynamics                      | 6     | 2     | 4     | 11    |
| Eukaryotic DNA replication                | 7     | 1     | 2     | >     |
| Collagen biosynthesis                     | 2     | 6     | 16    | >     |

decomposed

|                                                                  | MSN01 | MSN05 | MSN06 | MSN09 |
|------------------------------------------------------------------|-------|-------|-------|-------|
| Metabolism of non-essential amino acids                          | 1     | 1     | 1     | 1     |
| Cellular response to oxidative stress                            | 3     | 2     | 3     | 2     |
| Apoptosis                                                        | 4     | 3     | 2     | 3     |
| Cellular antioxidant systems                                     | 10    | 5     | 8     | 6     |
| Myofibril formation and organization                             | 7     | 5     | 4     | >     |
| Cellular response to hypoxia                                     | 9     | 4     | 7     | >     |
| ECM breakdown                                                    | 2     | 6     | >     | >     |
| DNA recombination                                                | 6     | 5     | >     | >     |
| Cellular response to radiation                                   | >     | 4     | >     | >     |
| Metabolism and transport of cholesterol, steroids and bile acids | 5     | >     | >     | >     |

|                                           | MSN01 | MSN05 | MSN06 | MSN09 |
|-------------------------------------------|-------|-------|-------|-------|
| Chromosome segregation by mitotic spindle | 1     | 1     | 1     | 1     |
| Eukaryotic DNA replication                | 2     | 2     | 2     | 2     |
| Mitotic cell cycle checkpoints            | 3     | 5     | 3     | 3     |
| Cytokinesis                               | 4     | 3     | 4     | 4     |
| Centrosome cycle                          | 5     | 6     | 5     | 5     |
| Matricellular protein signaling           | 4     | 6     | 7     | >     |

complete

|                                                            | MSN01 | MSN05 | MSN06 | MSN09 |
|------------------------------------------------------------|-------|-------|-------|-------|
| Collagen biosynthesis                                      | 7     | 1     | 3     | 1     |
| Epidermal growth factor family signaling                   | 2     | 2     | 4     | 2     |
| TM ion transport involved in membrane potential generation | 2     | 2     | 4     | 2     |
| Matricellular protein signaling                            | 1     | 1     | 6     | 1     |
| Myofibril formation and organization                       | 1     | 1     | 6     | 1     |
| Cellular response to hypoxia                               | 1     | 1     | 6     | 1     |
| Apoptosis                                                  | 1     | 1     | 6     | 1     |
| Complement pathway and regulation                          | 1     | 1     | 6     | 1     |
| Cellular response to oxidative stress                      | 2     | 2     | 4     | 2     |
| Signaling pathways involved in hematopoiesis               | 3     | 3     | 4     | 3     |
| Pattern recognition signaling                              | 3     | 3     | 4     | 3     |
| Elastogenesis                                              | 4     | 4     | 3     | 4     |
| Interphase nucleus and nuclear chromatin organization      | 4     | 4     | 3     | 4     |
| Neoptosis                                                  | 5     | 5     | 1     | 5     |
| Cellular response to energy deprivation                    | 5     | 5     | 1     | 5     |

no1stSVD

|                                                            | MSN01 | MSN05 | MSN06 | MSN09 |
|------------------------------------------------------------|-------|-------|-------|-------|
| Collagen biosynthesis                                      | 6     | 1     | 3     | 1     |
| TM ion transport involved in membrane potential generation | 1     | 1     | 5     | 1     |
| Matricellular protein signaling                            | 1     | 1     | 2     | 4     |
| Cellular response to hypoxia                               | 1     | 1     | 2     | 4     |
| Apoptosis                                                  | 1     | 1     | 2     | 4     |
| Pattern recognition signaling                              | 3     | 3     | 2     | 1     |
| Complement pathway and regulation                          | 3     | 3     | 2     | 1     |
| Cellular response to oxidative stress                      | 2     | 2     | 4     | 2     |
| Cell-cell adhesion                                         | 2     | 2     | 4     | 2     |
| Signaling pathways involved in hematopoiesis               | 3     | 3     | 4     | 3     |
| Cardiomyocyte action potential generation and propagation  | 4     | 4     | 3     | 4     |
| Interphase nucleus and nuclear chromatin organization      | 4     | 4     | 3     | 4     |
| Elastogenesis                                              | 5     | 5     | 4     | 5     |
| Neoptosis                                                  | 5     | 5     | 1     | 5     |
| Cellular response to energy deprivation                    | 5     | 5     | 1     | 5     |

decomposed

|                                                 | MSN01 | MSN05 | MSN06 | MSN09 |
|-------------------------------------------------|-------|-------|-------|-------|
| ECM breakdown                                   | 7     | 3     | 6     | 3     |
| Cellular response to oxidative stress           | 2     | 6     | 4     | 8     |
| Collagen biosynthesis                           | 3     | 7     | 1     | 9     |
| Complement pathway and regulation               | 1     | 2     | 1     | 1     |
| Metabolism of non-essential amino acids         | 2     | 2     | 3     | 2     |
| Matricellular protein signaling                 | 5     | 5     | 4     | 5     |
| Apoptosis                                       | 4     | 4     | 5     | 7     |
| Sig. pathways that control cell prol. and diff. | 4     | 4     | 9     | 4     |
| Myofibril formation and organization            | 1     | 7     | 10    | >     |

**MBCOL2  
gefitinib**  
(is c.toxic: no)

**Upregulated**

**Downregulated**

|                                                                  | MSN01 | MSN05 | MSN06 | MSN09 |
|------------------------------------------------------------------|-------|-------|-------|-------|
| Matricellular protein signaling                                  | 8     | 2     | 7     | 2     |
| Chromosome segregation by mitotic spindle                        | 1     | 1     | 1     | 1     |
| Mitotic cell cycle checkpoints                                   | 3     | 5     | 4     | 2     |
| Centrosome cycle                                                 | 4     | 3     | 4     | 3     |
| Cytokinesis                                                      | 2     | 4     | 5     | 5     |
| Microtubule dynamics                                             | 5     | 8     | 6     | 11    |
| Collagen biosynthesis                                            | 1     | 6     | 10    | 14    |
| Metabolism and transport of cholesterol, steroids and bile acids | 7     | 2     | 7     | 7     |
| ECM breakdown                                                    | 6     | 4     | >     | 13    |
| Carbohydrate metabolism and transport                            | >     | 11    | >     | 3     |
| Elastogenesis                                                    | 14    | 3     | >     | >     |
| Metabolism of fat-soluble vitamins                               | 5     | >     | >     | >     |

|                                                                  | MSN01 | MSN05 | MSN06 | MSN09 |
|------------------------------------------------------------------|-------|-------|-------|-------|
| Matricellular protein signaling                                  | 8     | 2     | 7     | 2     |
| Chromosome segregation by mitotic spindle                        | 1     | 1     | 1     | 1     |
| Centrosome cycle                                                 | 4     | 3     | 3     | 3     |
| Cytokinesis                                                      | 2     | 4     | 5     | 4     |
| Mitotic cell cycle checkpoints                                   | 3     | 5     | 4     | 6     |
| Microtubule dynamics                                             | 5     | 6     | 10    | 15    |
| Collagen biosynthesis                                            | 1     | 9     | 10    | 15    |
| Metabolism and transport of cholesterol, steroids and bile acids | 6     | 2     | 7     | 7     |
| Sig. pathways that control cell prol. and diff.                  | 11    | 4     | >     | 7     |
| Elastogenesis                                                    | 14    | 3     | >     | >     |
| Cellular response to hypoxia                                     | 13    | >     | >     | 5     |
| Carbohydrate metabolism and transport                            | >     | >     | >     | 2     |
| Metabolism of fat-soluble vitamins                               | 5     | >     | >     | >     |

|                                           | MSN01 | MSN05 | MSN06 | MSN09 |
|-------------------------------------------|-------|-------|-------|-------|
| Chromosome segregation by mitotic spindle | 1     | 1     | 1     | 1     |
| Cytokinesis                               | 2     | 2     | 3     | 2     |
| Mitotic cell cycle checkpoints            | 3     | 3     | 5     | 4     |
| Centrosome cycle                          | 4     | 4     | 3     | 5     |
| Matricellular protein signaling           | 5     | 5     | 4     | 5     |

**MBCOL2  
imatinib**  
(is c.toxic: no)

**Upregulated**

**Downregulated**

complete

|                                                                  | MSN01 | MSN05 | MSN06 | MSN09 |
|------------------------------------------------------------------|-------|-------|-------|-------|
| Metabolism and transport of cholesterol, steroids and bile acids | 5     | 1     | 2     | 1     |
| Chromosome segregation by mitotic spindle                        | 1     | 3     | 1     | >     |
| Centrosome cycle                                                 | 3     | 6     | 3     | >     |
| Mitotic cell cycle checkpoints                                   | 2     | 7     | 4     | >     |
| Fatty acid metabolism                                            | 8     | 4     | 2     | >     |
| Mitochondrial energy production                                  | 6     | 2     | 7     | >     |
| Cytokinesis                                                      | 4     | 8     | 5     | >     |
| Cardiomyocyte action potential generation and propagation        | >     | >     | 3     | >     |
| Signaling pathways involved in glucose and lipid homeostasis     | >     | >     | 4     | >     |
| ECM breakdown                                                    | >     | >     | 5     | >     |
| Carbohydrate metabolism and transport                            | 5     | >     | >     | >     |

|                                                 | MSN01 | MSN05 | MSN06 | MSN09 |
|-------------------------------------------------|-------|-------|-------|-------|
| Collagen biosynthesis                           | 1     | 2     | 6     | >     |
| Matricellular protein signaling                 | 3     | 2     | 5     | >     |
| Epidermal growth factor family signaling        | 5     | 8     | 1     | >     |
| Elastogenesis                                   | 4     | 5     | 7     | >     |
| ECM breakdown                                   | 2     | 3     | >     | >     |
| Sig. pathways that control cell prol. and diff. | 4     | 4     | 3     | >     |
| Cellular response to hypoxia                    | 6     | 1     | 1     | >     |
| Myofibril formation and organization            | >     | 3     | 8     | >     |
| Metabolism of fat-soluble vitamins              | 9     | 4     | 4     | >     |
| Fibronectin matrix dynamics                     | 1     | >     | >     | >     |
| Carbohydrate metabolism and transport           | >     | >     | 2     | >     |
| Cell-cell adhesion                              | 4     | 4     | >     | >     |

no1stSVD

|                                                                  | MSN01 | MSN05 | MSN06 | MSN09 |
|------------------------------------------------------------------|-------|-------|-------|-------|
| Metabolism and transport of cholesterol, steroids and bile acids | 5     | 1     | 2     | 1     |
| Chromosome segregation by mitotic spindle                        | 1     | 3     | 1     | >     |
| Mitotic cell cycle checkpoints                                   | 2     | 5     | 4     | >     |
| Centrosome cycle                                                 | 4     | 4     | 3     | >     |
| Mitochondrial energy production                                  | 6     | 2     | 7     | >     |
| Fatty acid metabolism                                            | 8     | 6     | 2     | >     |
| Cytokinesis                                                      | 3     | 8     | 5     | >     |
| Cardiomyocyte action potential generation and propagation        | >     | >     | 3     | >     |
| Signaling pathways involved in glucose and lipid homeostasis     | >     | >     | 4     | >     |
| Signaling pathways involved in hematopoiesis                     | >     | >     | 5     | >     |

|                                                 | MSN01 | MSN05 | MSN06 | MSN09 |
|-------------------------------------------------|-------|-------|-------|-------|
| Collagen biosynthesis                           | 1     | 2     | 6     | >     |
| Epidermal growth factor family signaling        | 1     | 8     | 1     | >     |
| Matricellular protein signaling                 | 4     | 2     | 5     | >     |
| Elastogenesis                                   | 5     | 5     | 7     | >     |
| ECM breakdown                                   | 3     | 3     | >     | >     |
| Sig. pathways that control cell prol. and diff. | 4     | 4     | 3     | >     |
| Cellular response to hypoxia                    | 6     | 1     | 1     | >     |
| Metabolism of fat-soluble vitamins              | 9     | 4     | 4     | >     |
| Fibronectin matrix dynamics                     | 2     | >     | >     | >     |
| Carbohydrate metabolism and transport           | >     | >     | 2     | >     |

decomposed

|                                                                  | MSN01 | MSN05 | MSN06 | MSN09 |
|------------------------------------------------------------------|-------|-------|-------|-------|
| Metabolism and transport of cholesterol, steroids and bile acids | 2     | 2     | 2     | 1     |
| Chromosome segregation by mitotic spindle                        | 1     | 1     | 1     | >     |
| Mitotic cell cycle checkpoints                                   | 4     | 5     | 3     | >     |
| Centrosome cycle                                                 | 3     | 4     | 5     | >     |
| Cytokinesis                                                      | 6     | 3     | 4     | >     |
| Fatty acid metabolism                                            | 8     | 9     | 2     | >     |
| Cellular antioxidant systems                                     | 7     | >     | 3     | >     |
| Cellular response to oxidative stress                            | 5     | 9     | >     | >     |
| ECM breakdown                                                    | >     | 11    | 4     | >     |
| Metabolism of glutamate and histidine products                   | >     | >     | 5     | >     |

|                                                 | MSN01 | MSN05 | MSN06 | MSN09 |
|-------------------------------------------------|-------|-------|-------|-------|
| Sig. pathways that control cell prol. and diff. | 4     | 5     | 2     | 3     |
| Matricellular protein signaling                 | 3     | 2     | 6     | >     |
| Cellular response to hypoxia                    | 2     | 8     | 1     | >     |
| ECM breakdown                                   | 12    | 3     | 4     | >     |
| Epidermal growth factor family signaling        | 15    | 12    | 3     | >     |
| Metabolism of non-essential amino acids         | 1     | 1     | 1     | 5     |
| Collagen biosynthesis                           | 1     | >     | 5     | >     |
| Metabolism of fat-soluble vitamins              | 5     | >     | 4     | >     |
| Carbohydrate metabolism and transport           | >     | >     | 2     | >     |
| Elastogenesis                                   | 4     | >     | >     | >     |

complete

|                                                                  | MSN01 | MSN05 | MSN06 | MSN09 |
|------------------------------------------------------------------|-------|-------|-------|-------|
| Metabolism and transport of cholesterol, steroids and bile acids | 4     | 1     | 1     | 1     |
| Interferon signaling                                             | 5     | 8     | 2     | 2     |
| Cellular response to oxidative stress                            | 8     | 8     | 11    | 2     |
| Collagen biosynthesis                                            | 2     | 7     | 4     | 4     |
| Fatty acid metabolism                                            | 2     | 7     | 4     | 4     |
| Complement pathway and regulation                                | 2     | 9     | 4     | 3     |
| Gastrointestinal hormone signaling                               | 2     | 9     | 4     | 3     |
| ECM breakdown                                                    | 2     | 2     | 4     | 2     |
| Steroid and sex hormone signaling                                | 2     | 2     | 4     | 2     |
| Signaling pathways involved in hematopoiesis                     | 3     | 3     | 4     | 3     |
| Pattern recognition signaling                                    | 3     | 3     | 4     | 3     |
| Elastogenesis                                                    | 4     | 3     | 4     | 3     |
| Lipid droplet dynamics                                           | 4     | 3     | 4     | 3     |
| Amyloid generation and aggregation                               | 4     | 3     | 4     | 3     |
| Matricellular protein signaling                                  | 4     | 3     | 4     | 3     |
| Apoptosis                                                        | 4     | 3     | 4     | 3     |
| Antigen presentation                                             | 4     | 3     | 4     | 3     |

no1stSVD

|                                                                  | MSN01 | MSN05 | MSN06 | MSN09 |
|------------------------------------------------------------------|-------|-------|-------|-------|
| Metabolism and transport of cholesterol, steroids and bile acids | 1     | 1     | 1     | 1     |
| Interferon signaling                                             | 2     | 2     | 2     | 4     |
| Cellular response to oxidative stress                            | 8     | 7     | 6     | 3     |
| Collagen biosynthesis                                            | 11    | 8     | 6     | 5     |
| Complement pathway and regulation                                | 11    | 8     | 6     | 5     |
| Amyloid generation and aggregation                               | 11    | 8     | 6     | 5     |
| Gastrointestinal hormone signaling                               | 12    | 5     | 3     | 4     |
| ECM breakdown                                                    | 2     | 2     | 4     | 2     |
| Steroid and sex hormone signaling                                | 2     | 2     | 4     | 2     |
| Pattern recognition signaling                                    | 3     | 3     | 4     | 3     |
| Lipid droplet dynamics                                           | 4     | 3     | 4     | 3     |
| Elastogenesis                                                    | 4     | 3     | 4     | 3     |
| Signaling pathways involved in hematopoiesis                     | 4     | 3     | 4     | 3     |
| Matricellular protein signaling                                  | 4     | 3     | 4     | 3     |
| Cardiomyocyte action potential generation and propagation        | 4     | 3     | 4     | 3     |
| Antigen presentation                                             | 4     | 3     | 4     | 3     |

decomposed

|                                                                  | MSN01 | MSN05 | MSN06 | MSN09 |
|------------------------------------------------------------------|-------|-------|-------|-------|
| Metabolism and transport of cholesterol, steroids and bile acids | 1     | 1     | 1     | 1     |
| Interferon signaling                                             | 2     | 2     | 2     | 4     |
| Sig. pathways that control cell prol. and diff.                  | 8     | 7     | 6     | 3     |
| Collagen biosynthesis                                            | 11    | 8     | 6     | 5     |
| Cellular response to hypoxia                                     | 3     | 3     | 8     | 5     |
| Gastrointestinal hormone signaling                               | 12    | 5     | 3     | 4     |
| Signaling pathways involved in hematopoiesis                     | 5     | 10    | 12    | >     |
| Cellular response to oxidative stress                            | 4     | 5     | 3     | >     |
| Complement pathway and regulation                                | 4     | 4     | 6     | >     |
| Cardiomyocyte action potential generation and propagation        | 4     | 4     | 7     | >     |
| Amyloid generation and aggregation                               | 3     | 4     | 10    | >     |
| Apoptosis                                                        | 3     | 4     | 10    | >     |
| Matricellular protein signaling                                  | 3     | 4     | 10    | >     |
| Metabolism of tryptophan products                                | 3     | 4     | 10    | >     |

**MBCOL2  
lapatinib**

**MBCOL2  
nilotinib  
(is c.toxic: no)**

**Upregulated**

|                                                                  | MSN01 | MSN02 | MSN06 | MSN08 | MSN09 |
|------------------------------------------------------------------|-------|-------|-------|-------|-------|
| Chromosome segregation by mitotic spindle                        | 9     | 1     | 1     | 1     | 1     |
| Metabolism of non-essential amino acids                          | 5     | 2     | 5     | 3     | 5     |
| Centrosome cycle                                                 | 14    | 6     | 2     | 2     | 2     |
| Cytokinesis                                                      | 9     | 3     | 5     | 4     |       |
| Mitotic cell cycle checkpoints                                   | 13    | 4     | 4     | 4     | 3     |
| Cellular response to hypoxia                                     | 1     | >     | >     | >     | >     |
| Collagen biosynthesis                                            | 13    | >     | >     | >     | >     |
| Rolling cell adhesion                                            | 3     | >     | >     | >     | >     |
| Myofibril formation and organization                             | 3     | >     | >     | >     | >     |
| Metabolism of glutamate and histidine products                   | 4     | >     | >     | >     | >     |
| Elastogenesis                                                    | 4     | >     | >     | >     | >     |
| Metabolism and transport of cholesterol, steroids and bile acids | 5     | >     | >     | >     | >     |

**Downregulated**

|                                                              | MSN01 | MSN02 | MSN06 | MSN08 | MSN09 |
|--------------------------------------------------------------|-------|-------|-------|-------|-------|
| Myofibril formation and organization                         | 7     | 1     | 1     | 1     | 1     |
| Neuronal action potential generation and propagation         | 6     | 3     | 14    | 11    |       |
| Sig. pathways that control cell prol. and diff.              | 2     | 8     | 5     | >     | >     |
| Actin filament dynamics                                      | 9     | 2     | 5     | >     | >     |
| Cytosolic intermediate filament and septin dynamics          | 10    | >     | 4     | 4     |       |
| Amyloid generation and aggregation                           | 3     | 13    | 14    | >     | >     |
| Cellular response to hypoxia                                 | 3     | >     | 3     | >     | >     |
| Collagen biosynthesis                                        | 1     | 6     | >     | >     | >     |
| Signaling pathways involved in hematopoiesis                 | 1     | 7     | 3     | >     | >     |
| Cardiomyocyte action potential generation and propagation    | 1     | 9     | >     | >     | >     |
| Fibronectin matrix dynamics                                  | 9     | 5     | 8     | >     | >     |
| Epidermal growth factor family signaling                     | 2     | 11    | 8     | >     | >     |
| Metabolism of fat-soluble vitamins                           | 4     | 12    | >     | >     | >     |
| Carbohydrate metabolism and transport                        | 4     | >     | 2     | >     | >     |
| Intracellular common signaling cascades of multiple pathways | 4     | >     | >     | >     | >     |
| Elastogenesis                                                | 4     | >     | >     | >     | >     |

complete

no1stSVD

decomposed

|                                                                  | MSN01 | MSN02 | MSN06 | MSN08 | MSN09 |
|------------------------------------------------------------------|-------|-------|-------|-------|-------|
| Chromosome segregation by mitotic spindle                        | 9     | 1     | 1     | 1     | 1     |
| Metabolism of non-essential amino acids                          | 5     | 2     | 5     | 4     | 5     |
| Centrosome cycle                                                 | 14    | 6     | 2     | 2     | 2     |
| Mitotic cell cycle checkpoints                                   | 13    | 3     | 3     | 3     |       |
| Cytokinesis                                                      | 9     | 4     | 5     | 4     |       |
| Myofibril formation and organization                             | 1     | >     | >     | >     | >     |
| Collagen biosynthesis                                            | 2     | >     | >     | >     | >     |
| Rolling cell adhesion                                            | 3     | 5     | >     | >     | >     |
| Cellular response to hypoxia                                     | 3     | >     | >     | >     | >     |
| Metabolism of glutamate and histidine products                   | 4     | >     | >     | >     | >     |
| Elastogenesis                                                    | 4     | >     | >     | >     | >     |
| Metabolism and transport of cholesterol, steroids and bile acids | 5     | >     | >     | >     | >     |

|                                                              | MSN01 | MSN02 | MSN06 | MSN08 | MSN09 |
|--------------------------------------------------------------|-------|-------|-------|-------|-------|
| Myofibril formation and organization                         | 3     | 1     | 1     | 1     | 1     |
| Neuronal action potential generation and propagation         | 5     | 2     | 10    | 11    |       |
| Sig. pathways that control cell prol. and diff.              | 2     | 8     | 5     | >     | >     |
| Cytosolic intermediate filament and septin dynamics          | 10    | >     | 2     | 4     |       |
| Actin filament dynamics                                      | 9     | 3     | 6     | >     | >     |
| Amyloid generation and aggregation                           | 3     | 13    | 8     | >     | >     |
| Cellular response to hypoxia                                 | 2     | 4     | 3     | >     | >     |
| Collagen biosynthesis                                        | 1     | 4     | >     | >     | >     |
| Cardiomyocyte action potential generation and propagation    | 1     | 9     | >     | >     | >     |
| Fibronectin matrix dynamics                                  | 9     | 5     | 7     | >     | >     |
| Metabolism of fat-soluble vitamins                           | 4     | 11    | >     | >     | >     |
| Carbohydrate metabolism and transport                        | 4     | 11    | 5     | >     | >     |
| Epidermal growth factor family signaling                     | 3     | 2     | >     | >     | >     |
| Elastogenesis                                                | 4     | >     | >     | >     | >     |
| Autophagy                                                    | 4     | >     | >     | >     | >     |
| Intracellular common signaling cascades of multiple pathways | 4     | >     | >     | >     | >     |

|                                           | MSN01 | MSN02 | MSN06 | MSN08 | MSN09 |
|-------------------------------------------|-------|-------|-------|-------|-------|
| Chromosome segregation by mitotic spindle | 1     | 1     | 1     | 1     | 1     |
| Cytokinesis                               | 2     | 2     | 3     | 4     | 2     |
| Mitotic cell cycle checkpoints            | 3     | 3     | 4     | 3     | 3     |
| Centrosome cycle                          | 4     | 4     | 2     | 2     | 4     |
| Metabolism of non-essential amino acids   | 7     | 5     | 5     | 5     | 5     |
| Cellular response to oxidative stress     | 5     | 6     | 6     | 6     | 6     |

|                                                           | MSN01 | MSN02 | MSN06 | MSN08 | MSN09 |
|-----------------------------------------------------------|-------|-------|-------|-------|-------|
| Collagen biosynthesis                                     | 7     | 1     | 2     | 6     | 6     |
| Sig. pathways that control cell prol. and diff.           | 3     | 9     | 11    | 7     | 4     |
| Myofibril formation and organization                      | 2     | 2     | 1     | 1     | 1     |
| ECM breakdown                                             | 2     | 11    | 4     | 3     |       |
| Cardiomyocyte action potential generation and propagation | 6     | 5     | 8     | 2     |       |
| Signaling pathways involved in hematopoiesis              | 6     | 12    | 3     | 2     |       |
| Amyloid generation and aggregation                        | 8     | 4     | 8     | 12    |       |
| Phase II biotransformation                                | 7     | 4     | 4     | 8     |       |
| Microtubule protein signaling                             | 1     | >     | 3     | >     | >     |
| Metabolism of fat-soluble vitamins                        | 3     | 5     | >     | >     | >     |
| Elastogenesis                                             | 4     | 10    | >     | >     | >     |
| Steroid hormone metabolism                                | 5     | 5     | >     | >     | >     |
| Signaling by extracellular matrix components              | 5     | 5     | >     | >     | >     |
| Cellular response to hypoxia                              | 5     | >     | >     | 5     | >     |

**MBCOL2  
pazopanib  
(is c.toxic: yes)**

**Upregulated**

|                                                                  | MSN01 | MSN02 | MSN06 | MSN08 | MSN09 |
|------------------------------------------------------------------|-------|-------|-------|-------|-------|
| Metabolism of non-essential amino acids                          | 2     | 2     | 1     | 2     |       |
| Carbohydrate metabolism and transport                            | 3     | 4     | 10    | 3     |       |
| Fatty acid metabolism                                            | 11    | 6     | 1     | 3     |       |
| PT protein modification in mitochondria                          | 4     | 5     | 11    | 5     |       |
| Mitochondrial energy production                                  | 1     | 1     | 8     | 4     |       |
| Metabolism and transport of cholesterol, steroids and bile acids | 8     | >     | 2     | 5     | 1     |
| Degradation by lysosomal enzymes                                 | 5     | 4     | 8     | >     | >     |
| Ammonium metabolism                                              | 9     | >     | 5     | 8     | >     |
| Collagen biosynthesis                                            | >     | >     | 3     | >     | >     |
| Cellular antioxidant systems                                     | >     | >     | 3     | >     | >     |

**Downregulated**

|                                                           | MSN01 | MSN02 | MSN06 | MSN08 | MSN09 |
|-----------------------------------------------------------|-------|-------|-------|-------|-------|
| Sig. pathways that control cell prol. and diff.           | 4     | 1     | 7     | 3     |       |
| ECM breakdown                                             | 6     | 3     | 4     | 10    |       |
| Cell-cell adhesion                                        | 2     | 6     | 3     | 12    |       |
| Cellular response to hypoxia                              | 11    | 6     | 1     | 1     |       |
| Cardiomyocyte action potential generation and propagation | 5     | 1     | 4     | 2     |       |
| Collagen biosynthesis                                     | 2     | 1     | 7     | 1     |       |
| Myofibril formation and organization                      | 5     | 1     | 8     | 2     |       |
| Apoptosis                                                 | 5     | 1     | 5     | 5     |       |
| Cellular response to radiation                            | 3     | 9     | >     | >     | >     |
| Epidermal growth factor family signaling                  | 4     | 9     | >     | >     | >     |
| Signaling by extracellular matrix components              | >     | >     | 4     | 12    | >     |
| TGF-beta superfamily signaling                            | >     | >     | 3     | 2     | >     |
| Neuronal signaling pathways                               | >     | >     | 2     | 5     | >     |
| Elastogenesis                                             | 5     | >     | >     | >     | >     |

complete

no1stSVD

decomposed

|                                                                  | MSN01 | MSN02 | MSN06 | MSN08 | MSN09 |
|------------------------------------------------------------------|-------|-------|-------|-------|-------|
| Metabolism of non-essential amino acids                          | 3     | 2     | 1     | 2     |       |
| Mitochondrial energy production                                  | 1     | 1     | 8     | 2     |       |
| Carbohydrate metabolism and transport                            | 2     | 3     | 11    | 4     |       |
| Fatty acid metabolism                                            | 12    | 4     | 5     | 1     |       |
| PT protein modification in mitochondria                          | 4     | 6     | 10    | 5     |       |
| Metabolism and transport of cholesterol, steroids and bile acids | 9     | >     | 1     | 5     | 1     |
| Degradation by lysosomal enzymes                                 | 5     | 4     | 8     | >     | >     |
| Cellular antioxidant systems                                     | 7     | 5     | >     | >     | >     |
| Collagen biosynthesis                                            | >     | >     | 3     | >     | >     |

|                                                           | MSN01 | MSN02 | MSN06 | MSN08 | MSN09 |
|-----------------------------------------------------------|-------|-------|-------|-------|-------|
| Sig. pathways that control cell prol. and diff.           | 4     | 1     | 4     | 4     | 3     |
| ECM breakdown                                             | 3     | 3     | 2     | 6     |       |
| Signaling pathways involved in hematopoiesis              | 3     | 7     | 10    | 3     |       |
| Cell-cell adhesion                                        | 6     | 5     | 7     | 8     |       |
| Cellular response to hypoxia                              | 12    | 15    | 1     | 1     |       |
| Cardiomyocyte action potential generation and propagation | 5     | 1     | 9     | 5     |       |
| Apoptosis                                                 | 5     | 1     | 10    | 5     |       |
| Collagen biosynthesis                                     | 2     | 7     | 7     | 1     |       |
| Epidermal growth factor family signaling                  | 4     | 6     | >     | >     | >     |
| Cellular response to radiation                            | 2     | 9     | >     | >     | >     |
| Microtubule dynamics                                      | >     | 4     | 12    | >     | >     |
| Myofibril formation and organization                      | >     | 13    | >     | >     | >     |
| Neuronal signaling pathways                               | >     | 2     | 5     | >     | >     |
| TGF-beta superfamily signaling                            | >     | 5     | >     | >     | >     |

|                                                                  | MSN01 | MSN02 | MSN06 | MSN08 | MSN09 |
|------------------------------------------------------------------|-------|-------|-------|-------|-------|
| Metabolism of non-essential amino acids                          | 3     | 2     | 2     | 3     |       |
| Mitochondrial energy production                                  | 1     | 1     | 8     | 2     |       |
| Carbohydrate metabolism and transport                            | 2     | 3     | 11    | 4     |       |
| Fatty acid metabolism                                            | 12    | 4     | 5     | 1     |       |
| PT protein modification in mitochondria                          | 4     | 6     | 10    | 5     |       |
| Metabolism and transport of cholesterol, steroids and bile acids | 9     | >     | 1     | 5     | 1     |
| Degradation by lysosomal enzymes                                 | 5     | 4     | 8     | >     | >     |
| Cellular antioxidant systems                                     | 7     | 5     | >     | >     | >     |
| Collagen biosynthesis                                            | >     | >     | 3     | >     | >     |

|                                                           | MSN01 | MSN02 | MSN06 | MSN08 | MSN09 |
|-----------------------------------------------------------|-------|-------|-------|-------|-------|
| Sig. pathways that control cell prol. and diff.           | 4     | 1     | 4     | 4     | 3     |
| ECM breakdown                                             | 3     | 3     | 2     | 6     |       |
| Signaling pathways involved in hematopoiesis              | 3     | 7     | 10    | 3     |       |
| Cell-cell adhesion                                        | 6     | 5     | 7     | 8     |       |
| Cellular response to hypoxia                              | 12    | 15    | 1     | 1     |       |
| Cardiomyocyte action potential generation and propagation | 5     | 1     | 9     | 5     |       |
| Apoptosis                                                 | 5     | 1     | 10    | 5     |       |
| Collagen biosynthesis                                     | 2     | 7     | 7     | 1     |       |
| Epidermal growth factor family signaling                  | 4     | 6     | >     | >     | >     |
| Cellular response to radiation                            | 2     | 9     | >     | >     | >     |
| Microtubule dynamics                                      | >     | 4     | 12    | >     | >     |
| Myofibril formation and organization                      | >     | 13    | >     | >     | >     |
| Neuronal signaling pathways                               | >     | 2     | 5     | >     | >     |
| TGF-beta superfamily signaling                            | >     | 5     | >     | >     | >     |

**MBCOL2  
ponatinib  
(is c.toxic: yes)**

**Upregulated**

|                                           | MSN01 | MSN02 | MSN06 | MSN08 | MSN09 |
|-------------------------------------------|-------|-------|-------|-------|-------|
| Chromosome segregation by mitotic spindle | 1     | 1     | 1     | 1     | 1     |
| Centrosome cycle                          | 3     | 2     | 2     | 2     | 2     |
| Cytokinesis                               | 4     | 3     | 4     | 4     | 3     |
| Mitotic cell cycle checkpoints            | 5     | 3     | 3     | 3     | 4     |
| Microtubule organization center dynamics  | 17    | 7     | 7     | 5     | 10    |
| Microtubule dynamics                      | 13    | >     | 5     | 6     | 6     |
| Metabolism of non-essential amino acids   | 2     | 4     | 6     | >     | >     |
| Cellular response to hypoxia              | 15    | 1     | >     | >     | >     |
| Carbohydrate metabolism and transport     | 3     | 2     | >     | >     | >     |
| Vesicle exocytosis                        | 3     | 3     | >     | >     | >     |
| Prostanoid receptor signaling             | 3     | 4     | >     | >     | >     |
| Ribonucleoprotein biogenesis              | 3     | >     | >     | 5     | >     |
| Drug and toxin export                     | 3     | 5     | >     | >     | >     |

**Downregulated**

|                                                                  | MSN01 | MSN02 | MSN06 | MSN08 | MSN09 |
|------------------------------------------------------------------|-------|-------|-------|-------|-------|
| Myofibril formation and organization                             | 1     | 0     | 1     | 1     | 1     |
| Signaling pathways involved in hematopoiesis                     | 4     | 16    | 12    | 10    | 8     |
| ECM breakdown                                                    | 3     | 5     | 6     | 9     |       |
| Sig. pathways that control cell prol. and diff.                  | 9     | 4     | 7     | 4     | 4     |
| Microtubule protein signaling                                    | 6     | 2     | 14    | 4     | 6     |
| Basement membrane dynamics                                       | 5     | 4     | 7     | 11    | 6     |
| Elastogenesis                                                    | 5     | 4     | 7     | 11    | 6     |
| Cytosolic intermediate filament and septin dynamics              | 11    | 3     | 5     | 11    |       |
| Actin filament dynamics                                          | 5     | 4     | 5     | 8     | 15    |
| Cellular response to hypoxia                                     | 1     | 1     | 1     | 12    |       |
| Collagen biosynthesis                                            | 5     | 12    | 2     | 1     |       |
| Cellular response to energy deprivation                          | 5     | 12    | 2     | 3     |       |
| Apoptosis                                                        | 9     | 3     | 15    | 4     | 5     |
| Cardiomyocyte action potential generation and propagation        | 9     | 3     | 15    | 4     | 5     |
| Fibronectin matrix dynamics                                      | 9     | 3     | 15    | 4     | 5     |
| Metabolism and transport of cholesterol, steroids and bile acids | 9     | 3     | 15    | 4     | 5     |
| Cellular response to oxidative stress                            | 3     | 7     | 4     | 3     |       |
| Carbohydrate metabolism and transport                            | 3     | 7     | 4     | 3     |       |

complete

no1stSVD

decomposed

|                                           | MSN01 | MSN02 | MSN06 | MSN08 | MSN09 |
|-------------------------------------------|-------|-------|-------|-------|-------|
| Chromosome segregation by mitotic spindle | 1     | 1     | 1     | 1     | 1     |
| Centrosome cycle                          | 3     | 2     | 2     | 2     | 2     |
| Cytokinesis                               | 5     | 3     | 4     | 3     | 3     |
| Mitotic cell cycle checkpoints            | 4     | 4     | 3     | 4     | 4     |
| Microtubule organization center dynamics  | 8     | 7     | 7     | 5     | 10    |
| Microtubule dynamics                      | 12    | 8     | 5     | 6     | 6     |
| Metabolism of non-essential amino acids   | 2     | 5     | 6     | >     | >     |
| Cellular response to hypoxia              | 10    | 1     | >     | >     | >     |
| Carbohydrate metabolism and transport     | 3     | 2     | >     | >     | >     |
| Vesicle exocytosis                        | 3     | 3     | >     | >     | >     |
| Prostanoid receptor signaling             | 3     | 4     | >     | >     | >     |
| Ribonucleoprotein biogenesis              | 3     | >     | >     | 5     | >     |
| Drug and toxin export                     | 3     | 5     | >     | >     | >     |

|                                                                  | MSN01 | MSN02 | MSN06 | MSN08 | MSN09 |   |
|------------------------------------------------------------------|-------|-------|-------|-------|-------|---|
| Signaling pathways involved in hematopoiesis                     | 4     | 17    | 12    | 6     | 13    | 8 |
| Myofibril formation and organization                             | 1     | 8     | 1     | 1     | 2     |   |
| Sig. pathways that control cell prol. and diff.                  | 9     | 4     | 7     | 4     | 6     |   |
| Microtubule protein signaling                                    | 6     | 2     | 15    | 4     | 6     |   |
| Basement membrane dynamics                                       | 5     | 4     | 7     | 3     | 6     | 7 |
| ECM breakdown                                                    | 3     | 5     | 10    | 8     |       |   |
| Elastogenesis                                                    | 5     | 4     | 7     | 10    |       |   |
| Cytosolic intermediate filament and septin dynamics              | 11    | 3     | 5     | 11    |       |   |
| Actin filament dynamics                                          | 6     | 4     | 7     | 15    |       |   |
| Cellular response to hypoxia                                     | 7     | 3     | 2     | 1     |       |   |
| Collagen biosynthesis                                            | 1     | 1     | 1     | 11    |       |   |
| Cellular response to energy deprivation                          | 5     | 12    | 2     | 3     |       |   |
| Apoptosis                                                        | 9     | 3     | 15    | 4     | 5     |   |
| Neuronal action potential generation and propagation             | 9     | 3     | 15    | 4     | 5     |   |
| Fibronectin matrix dynamics                                      | 9     | 3     | 15    | 4     | 5     |   |
| Metabolism and transport of cholesterol, steroids and bile acids | 9     | 3     | 15    | 4     | 5     |   |
| Cellular response to oxidative stress                            | 3     | 7     | 4     | 3     |       |   |
| Cardiomyocyte action potential generation and propagation        | 9     | 3     | 15    | 4     | 5     |   |
| Carbohydrate metabolism and transport                            | 3     | 7     | 4     | 3     |       |   |

|  | MSN01 |
|--|-------|
|--|-------|

**MBCOL2  
ruxolitinib  
(is c.toxic: no)**

**MBCOL2  
sorafenib  
(is c.toxic: yes)**

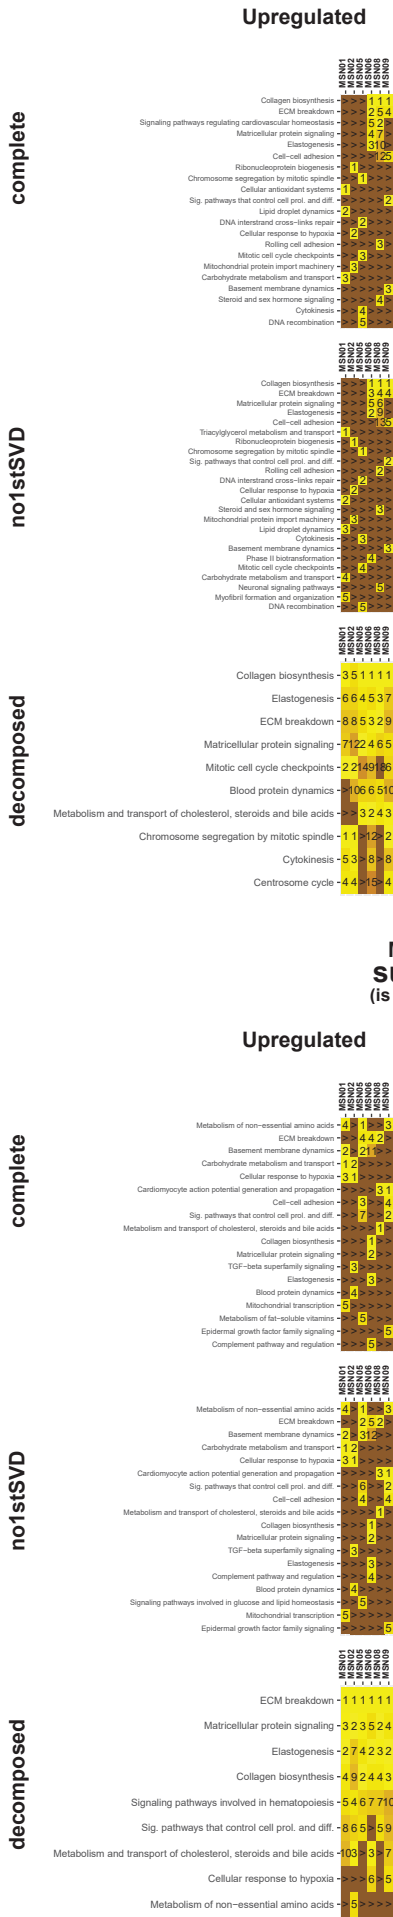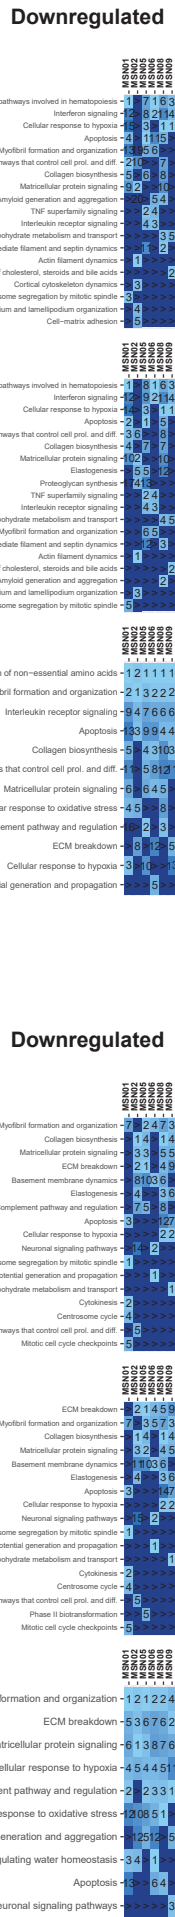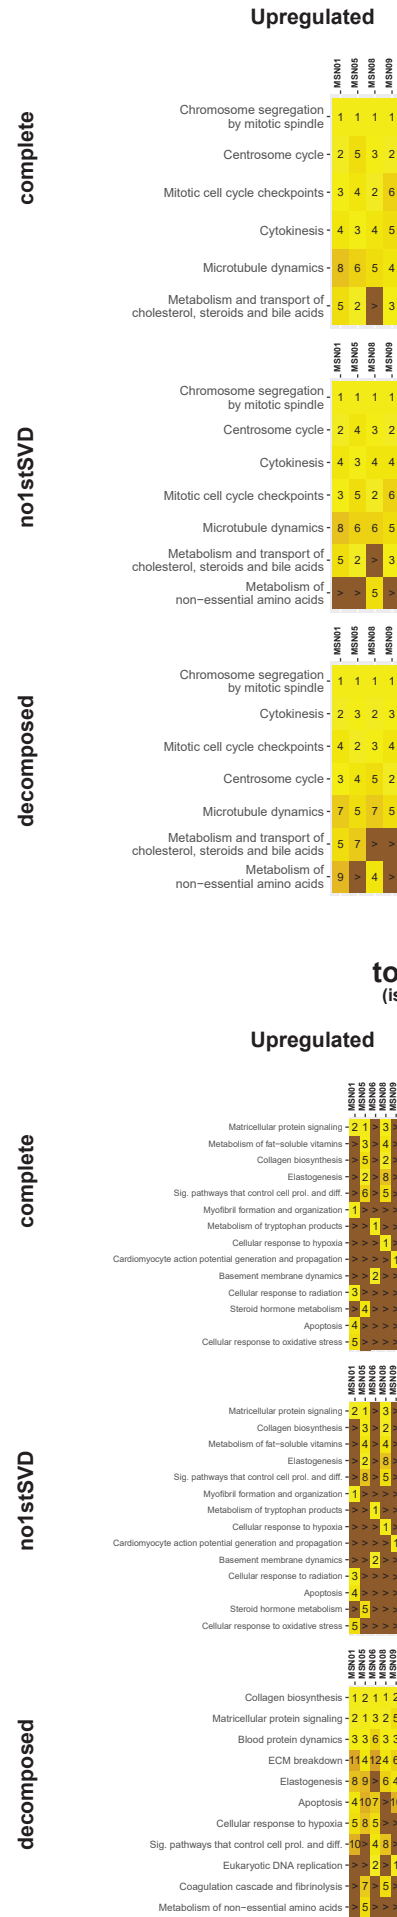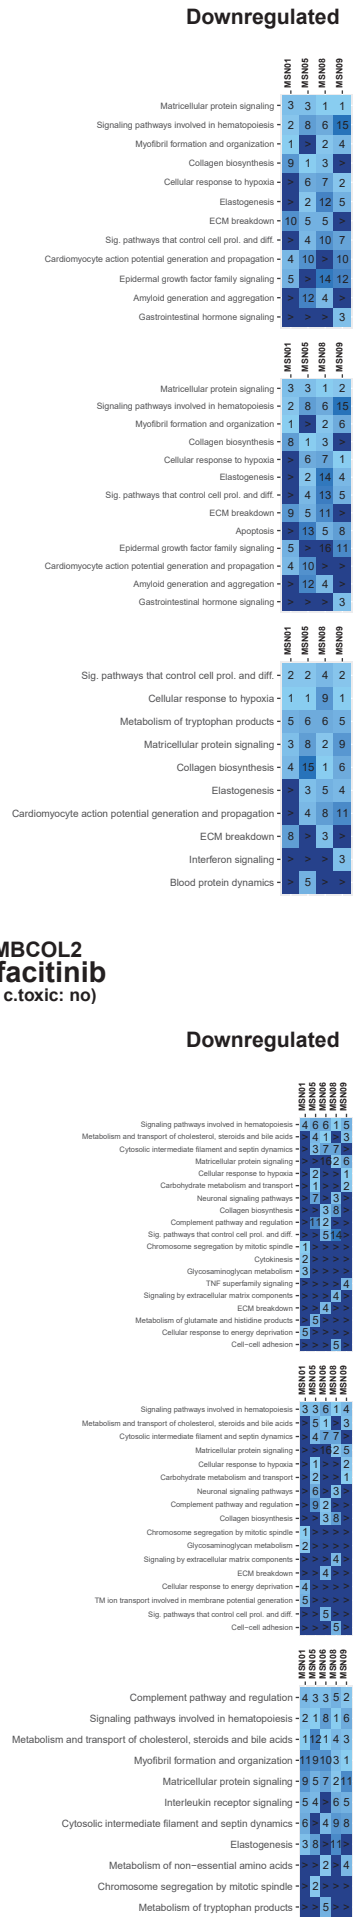

**MBCOL2  
trametinib  
(is c.toxic: yes)**

**MBCOL2  
vandetanib  
(is c.toxic: yes)**

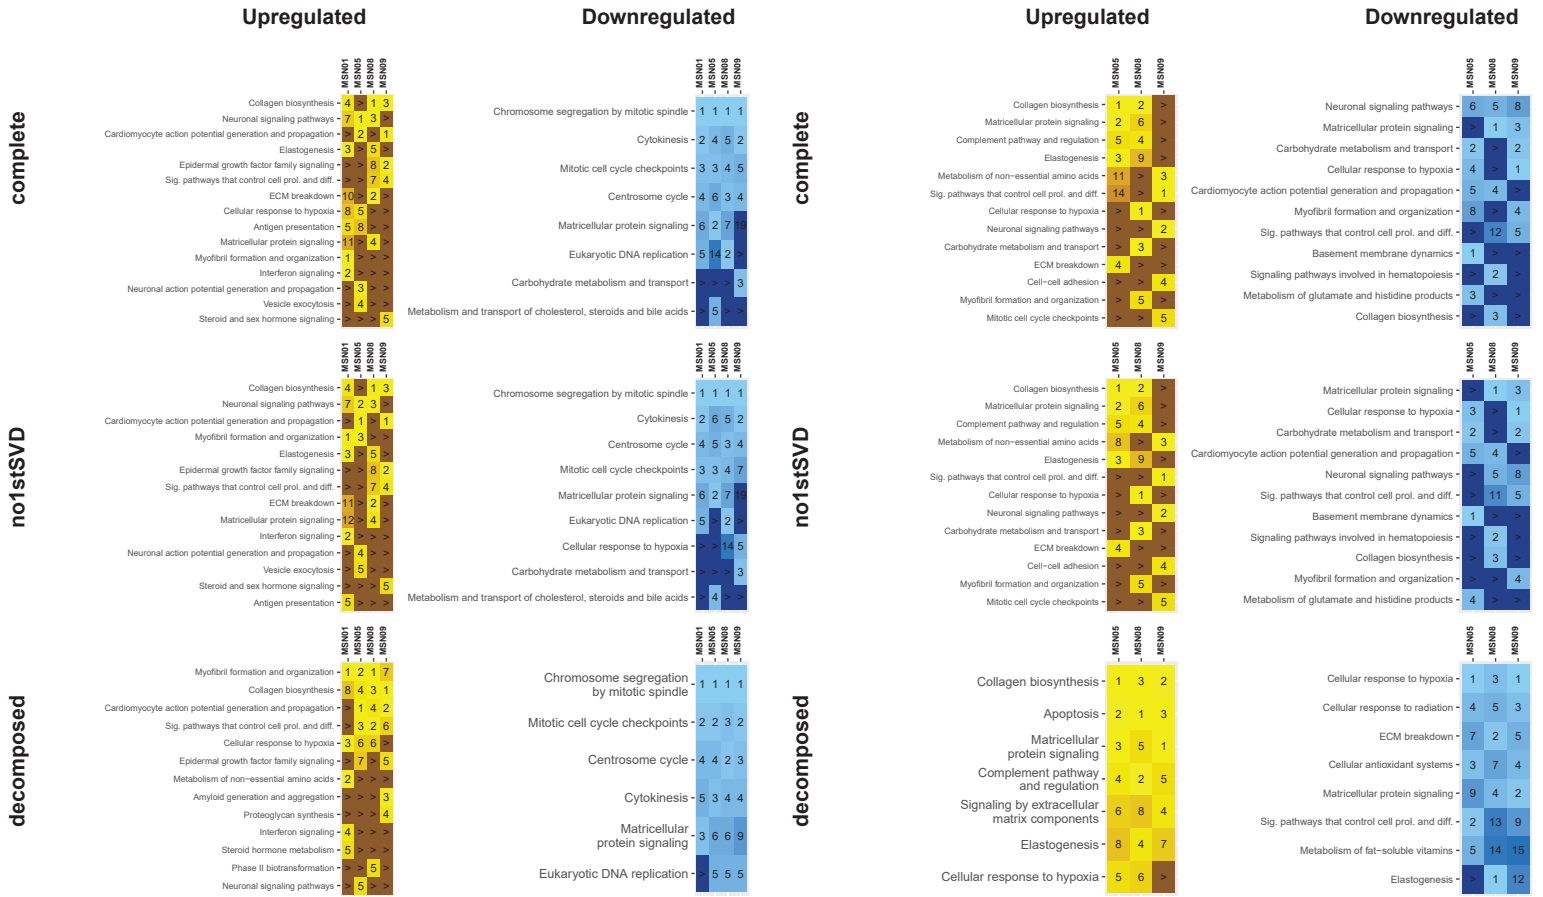

**MBCOL2  
vemurafenib  
(is c.toxic: no)**

**MBCOL2  
bevacizumab  
(is c.toxic: yes)**

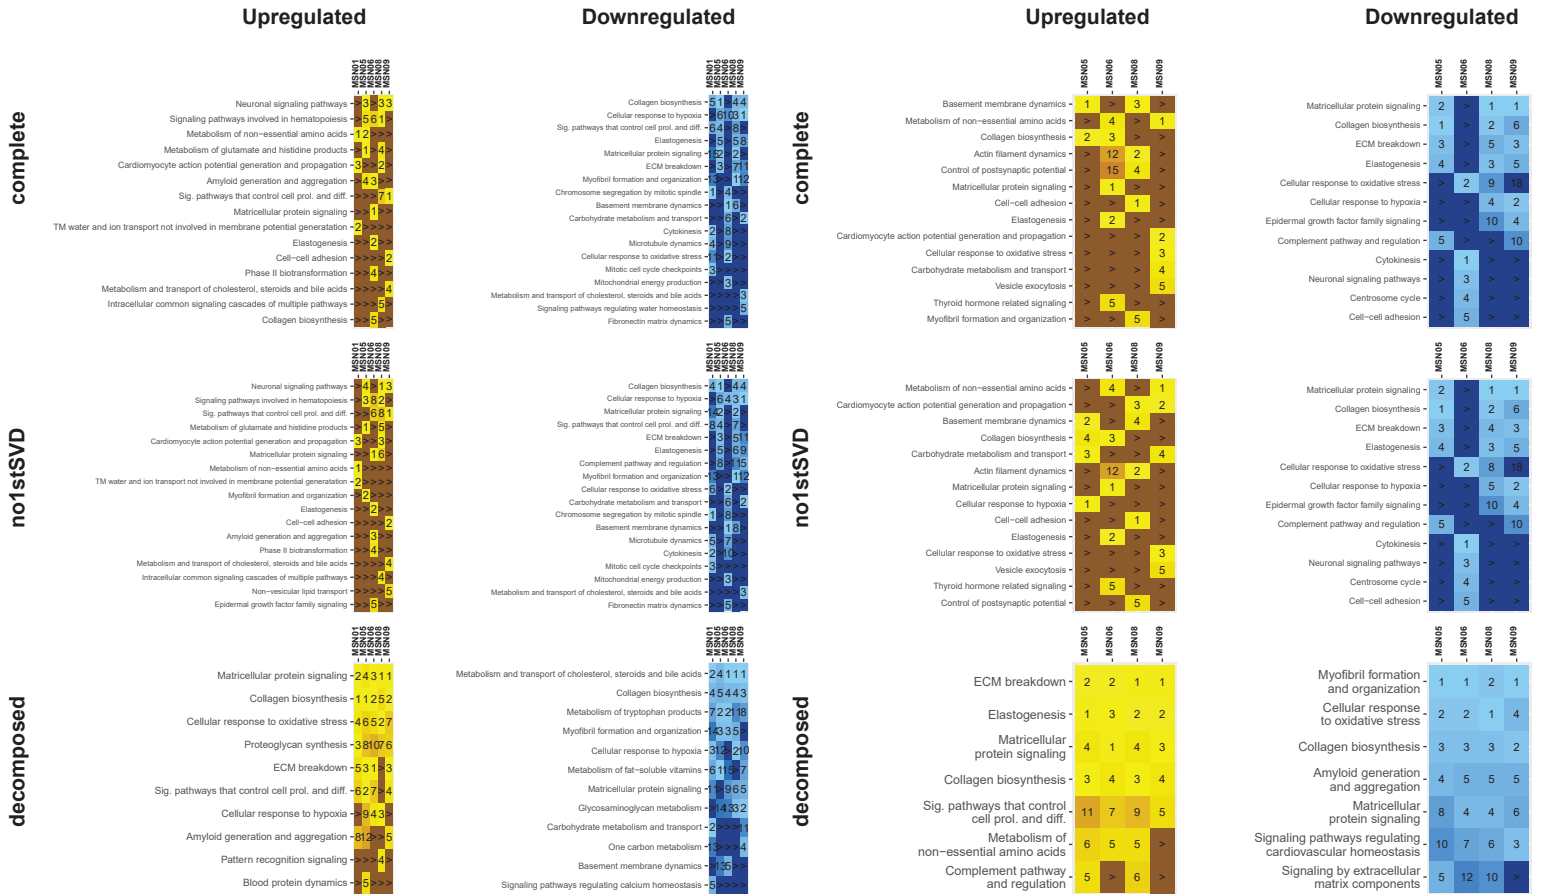

**MBCOL2  
cetuximab  
(is c.toxic: no)**

**MBCOL2  
rituximab  
(is c.toxic: no)**

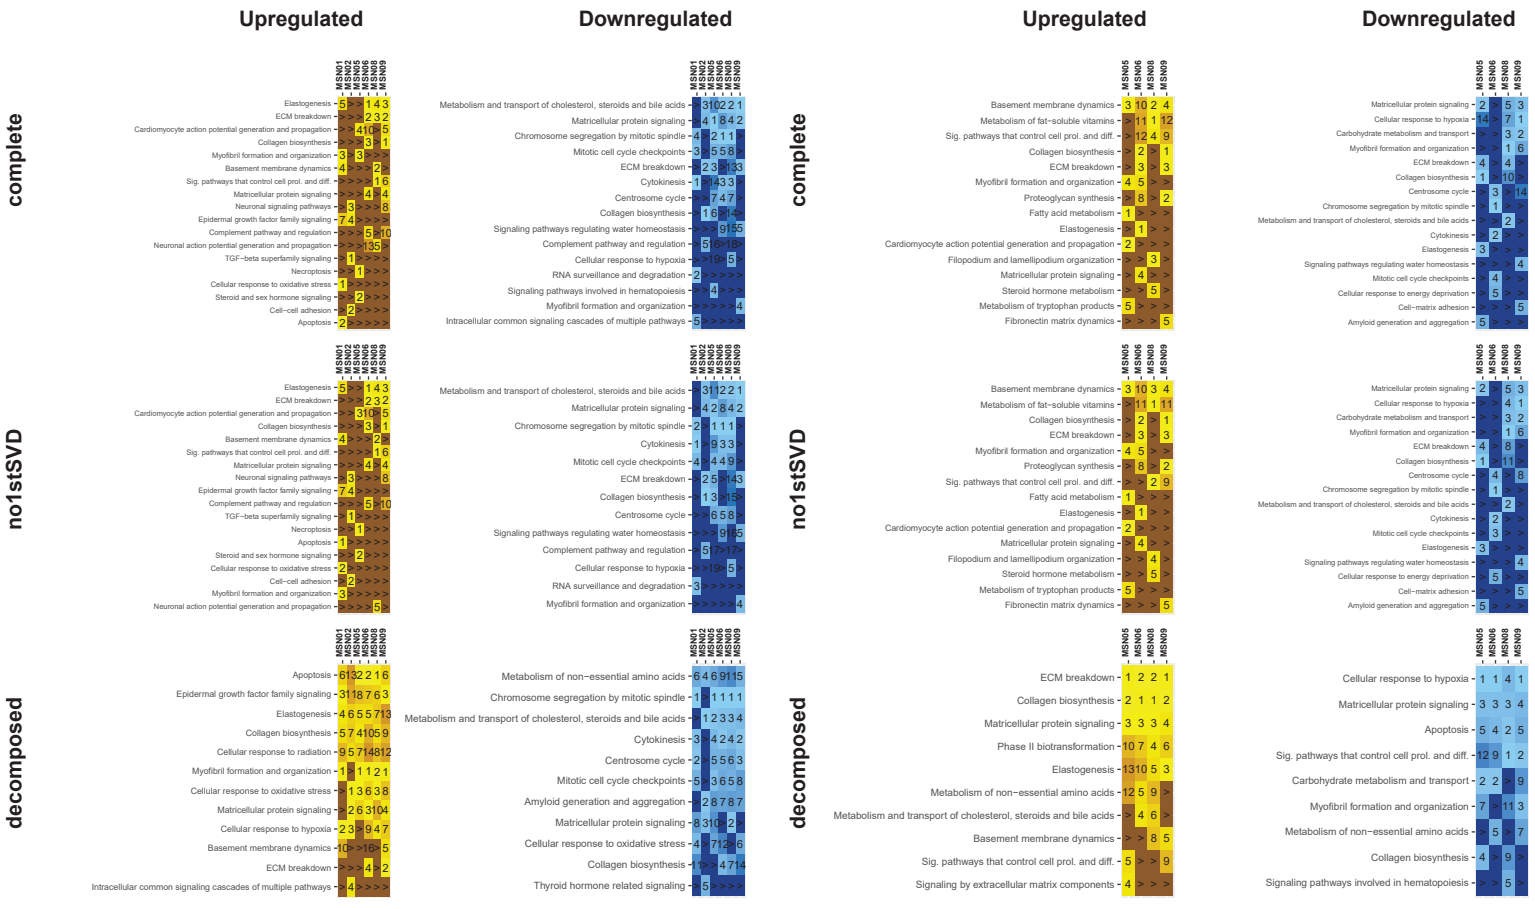

**MBCOL2  
trastuzumab  
(is c.toxic: yes)**

**MBCOL2  
daunorubicin  
(is c.toxic: yes)**

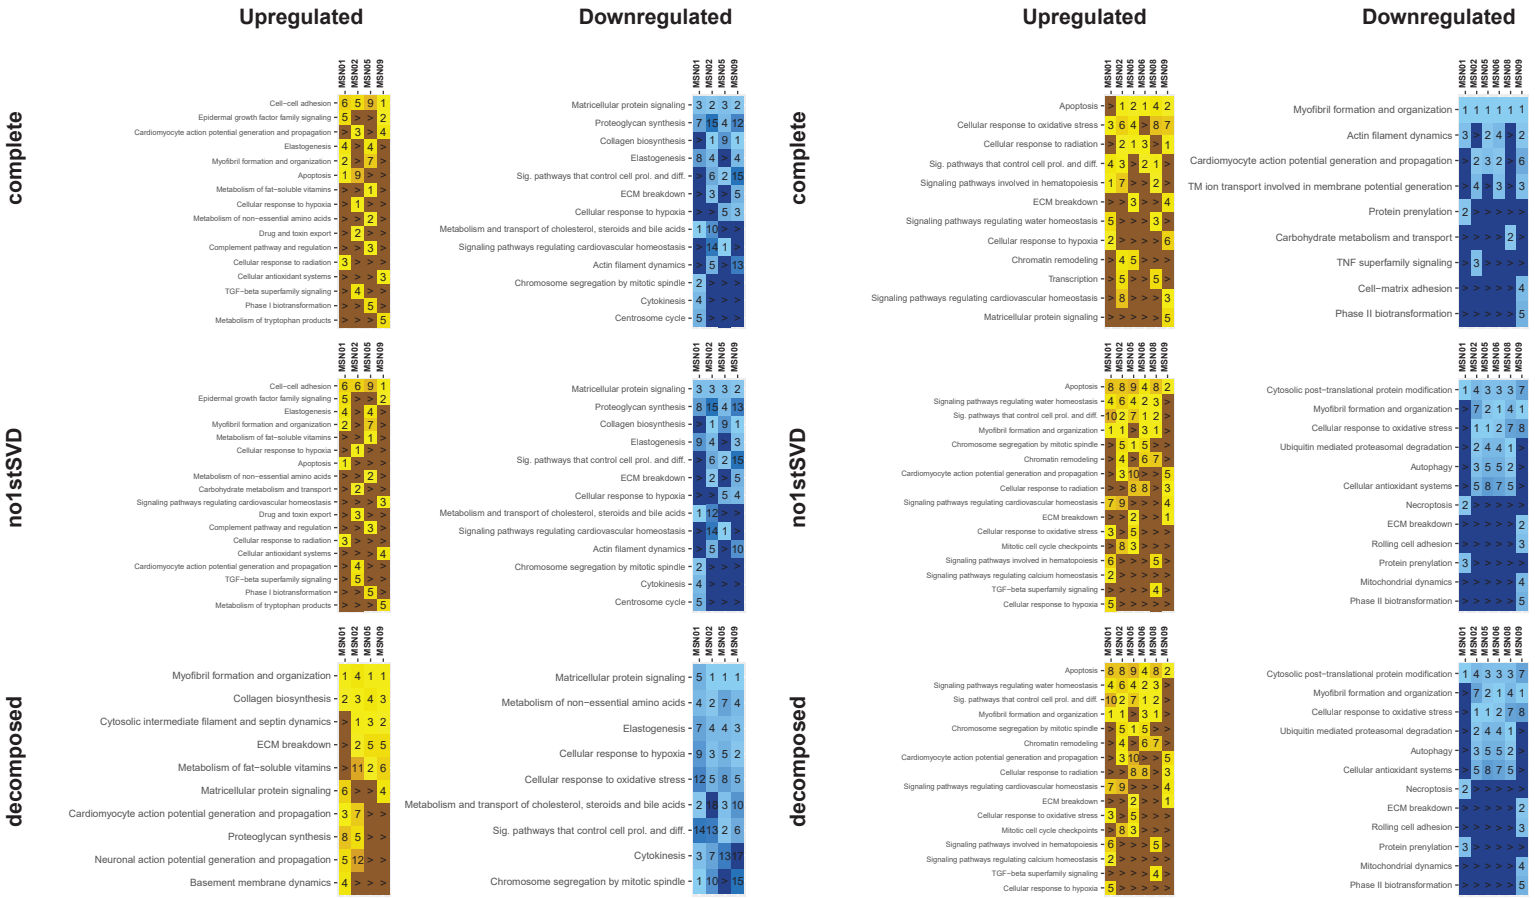

**MBCOL2  
doxorubicin**  
(is c.toxic: yes)

**MBCOL2  
epirubicin**  
(is c.toxic: yes)

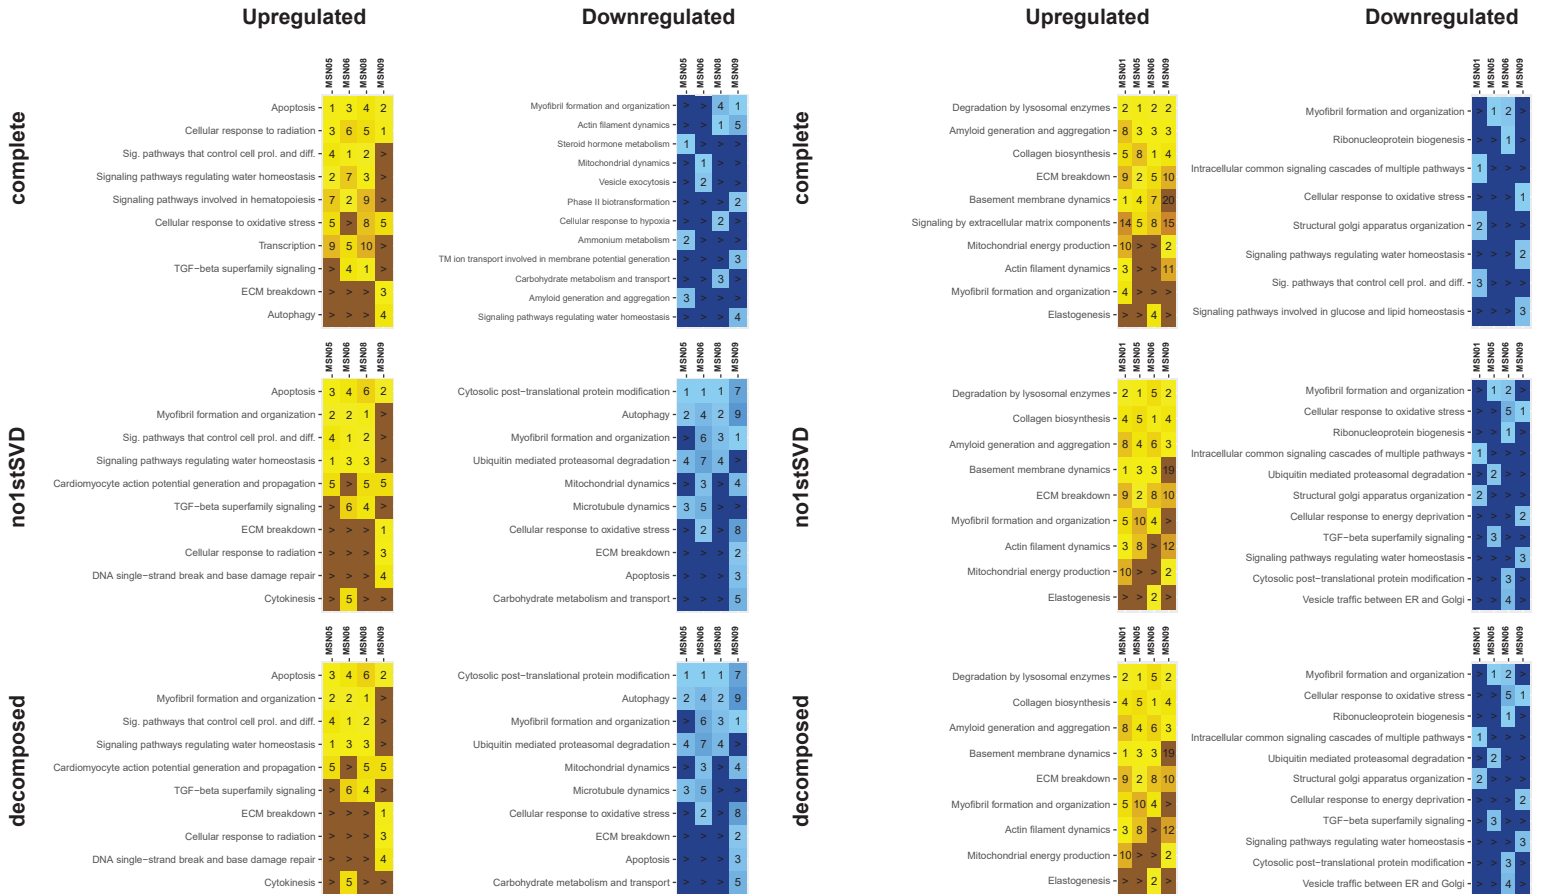

**MBCOL2  
idarubicin**  
(is c.toxic: yes)

**MBCOL2  
amiodarone**  
(is c.toxic: nd)

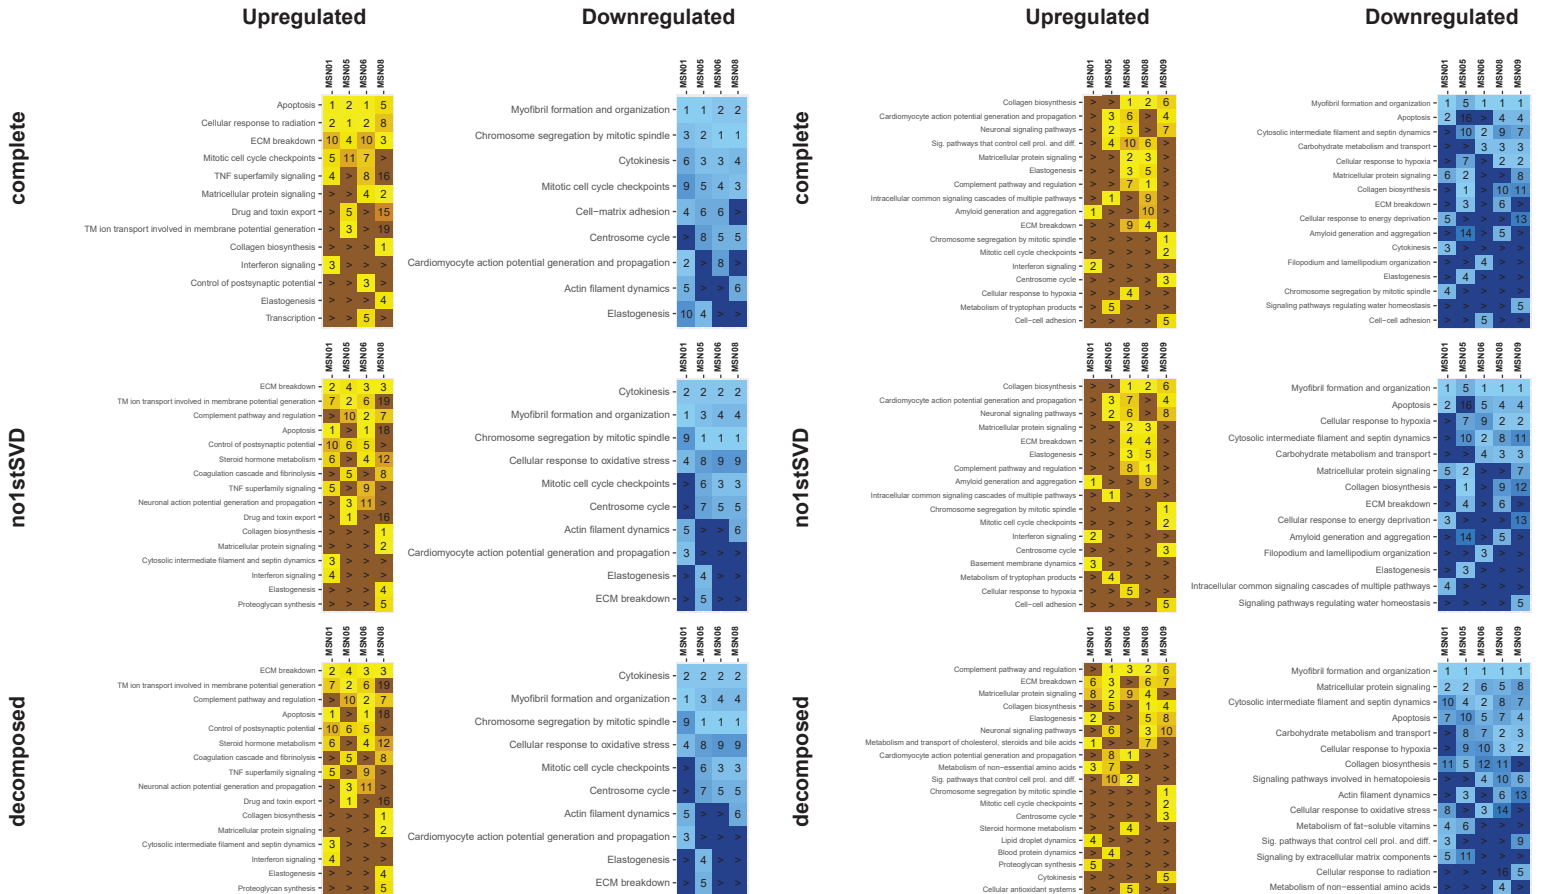

**MBCOL2**  
**dobutamine**  
(is c.toxic: nd)

**MBCOL2**  
**flecainide**  
(is c.toxic: nd)

**Upregulated**

**Downregulated**

**Upregulated**

**Downregulated**

complete

|                                                                          | MS101 | MS105 | MS106 | MS108 | MS109 |
|--------------------------------------------------------------------------|-------|-------|-------|-------|-------|
| Collagen biosynthesis                                                    | 7     | 1     | 4     | 1     | 1     |
| Carbohydrate metabolism and transport                                    | 2     | 2     | 1     | 9     | 2     |
| Sig. pathways that control cell prol. and diff.                          | 8     | 8     | 3     | 3     | 3     |
| Basement membrane dynamics                                               | 1     | 1     | 4     | 4     | 4     |
| Matricellular protein signaling                                          | 2     | 1     | 1     | 6     | 6     |
| Elastogenesis                                                            | 3     | 3     | 5     | 5     | 5     |
| Cardiomyocyte action potential generation and propagation                | 2     | 2     | 7     | 7     | 7     |
| Control of postsynaptic potential                                        | 5     | 5     | 5     | 5     | 5     |
| Photolytic synthesis                                                     | 1     | 1     | 5     | 10    | 10    |
| Puynergic signaling                                                      | 1     | 1     | 1     | 1     | 1     |
| Cellular response to hypoxia                                             | 1     | 1     | 1     | 2     | 2     |
| Actin filament dynamics                                                  | 3     | 3     | 3     | 3     | 3     |
| Signaling pathways involved in hematopoiesis                             | 3     | 3     | 3     | 3     | 3     |
| Mitochondrial dynamics                                                   | 3     | 3     | 3     | 3     | 3     |
| Metabolism of glutamate and histidine products                           | 3     | 3     | 3     | 3     | 3     |
| Neuronal signaling pathways                                              | 4     | 4     | 4     | 4     | 4     |
| Myofibril formation and organization                                     | 4     | 4     | 4     | 4     | 4     |
| Metabolism and transport of cholesterol, steroids and bile acids         | 4     | 4     | 4     | 4     | 4     |
| TM water and ion transport not involved in membrane potential generation | 5     | 5     | 5     | 5     | 5     |

|                                                                  | MS101 | MS105 | MS106 | MS108 | MS109 |
|------------------------------------------------------------------|-------|-------|-------|-------|-------|
| Matricellular protein signaling                                  | 8     | 2     | 1     | 1     | 6     |
| Cellular response to oxidative stress                            | 10    | 2     | 12    | 3     | 3     |
| Mitotic cell cycle checkpoints                                   | 3     | 1     | 14    | 2     | 2     |
| Collagen biosynthesis                                            | 1     | 1     | 5     | 1     | 1     |
| Centrosome cycle                                                 | 4     | 1     | 4     | 4     | 4     |
| Cytokinesis                                                      | 2     | 6     | 7     | 4     | 4     |
| Complement pathway and regulation                                | 6     | 6     | 4     | 4     | 4     |
| Sig. pathways that control cell prol. and diff.                  | 4     | 10    | 11    | 11    | 11    |
| Basement membrane dynamics                                       | 5     | 10    | 10    | 10    | 10    |
| Signaling pathways involved in hematopoiesis                     | 5     | 11    | 11    | 11    | 11    |
| Chromosome segregation by mitotic spindle                        | 1     | 1     | 1     | 1     | 1     |
| Cellular antioxidant systems                                     | 1     | 1     | 2     | 2     | 2     |
| Myofibril formation and organization                             | 1     | 2     | 2     | 2     | 2     |
| Phase II biotransformation                                       | 3     | 3     | 3     | 3     | 3     |
| Metabolism and transport of cholesterol, steroids and bile acids | 3     | 3     | 3     | 3     | 3     |
| ECM breakdown                                                    | 3     | 3     | 3     | 3     | 3     |
| Amyloid generation and aggregation                               | 4     | 4     | 4     | 4     | 4     |
| Mitochondrial energy production                                  | 4     | 4     | 4     | 4     | 4     |
| Fatty acid metabolism                                            | 5     | 5     | 5     | 5     | 5     |

complete

|                                                          | MS101 | MS105 | MS106 | MS108 | MS109 |
|----------------------------------------------------------|-------|-------|-------|-------|-------|
| Collagen biosynthesis                                    | 2     | 2     | 1     | 1     | 1     |
| Matricellular protein signaling                          | 1     | 1     | 1     | 1     | 1     |
| Chromosome segregation by mitotic spindle                | 4     | 4     | 4     | 4     | 4     |
| ECM breakdown                                            | 4     | 4     | 4     | 4     | 4     |
| Elastogenesis                                            | 4     | 4     | 4     | 4     | 4     |
| Mitotic cell cycle checkpoints                           | 7     | 7     | 7     | 7     | 7     |
| Complement pathway and regulation                        | 1     | 1     | 1     | 1     | 1     |
| Signaling pathways regulating cardiovascular homeostasis | 1     | 1     | 1     | 1     | 1     |
| Thyroid hormone related signaling                        | 1     | 1     | 1     | 1     | 1     |
| Metabolism of hypphoph products                          | 2     | 2     | 2     | 2     | 2     |
| Interphase nucleus and nuclear chromatin organization    | 2     | 2     | 2     | 2     | 2     |
| Protein prenylation                                      | 2     | 2     | 2     | 2     | 2     |
| Cellular response to radiation                           | 3     | 3     | 3     | 3     | 3     |
| Carbohydrate metabolism and transport                    | 3     | 3     | 3     | 3     | 3     |
| Microtubule dynamics                                     | 3     | 3     | 3     | 3     | 3     |
| Apoptosis                                                | 4     | 4     | 4     | 4     | 4     |
| Myofibril formation and organization                     | 4     | 4     | 4     | 4     | 4     |
| Metabolism of fat-soluble vitamins                       | 5     | 5     | 5     | 5     | 5     |

|                                                                          | MS101 | MS105 | MS106 | MS108 | MS109 |
|--------------------------------------------------------------------------|-------|-------|-------|-------|-------|
| Collagen biosynthesis                                                    | 1     | 1     | 1     | 1     | 1     |
| Cellular response to hypoxia                                             | 6     | 6     | 2     | 2     | 2     |
| Sig. pathways that control cell prol. and diff.                          | 4     | 1     | 7     | 7     | 7     |
| Neuronal signaling pathways                                              | 3     | 3     | 6     | 6     | 6     |
| Basement membrane dynamics                                               | 5     | 5     | 5     | 5     | 5     |
| Elastogenesis                                                            | 5     | 5     | 5     | 5     | 5     |
| Matricellular protein signaling                                          | 5     | 5     | 2     | 2     | 2     |
| Myofibril formation and organization                                     | 1     | 1     | 1     | 1     | 1     |
| Intracellular common signaling cascades of multiple pathways             | 1     | 1     | 1     | 1     | 1     |
| Carbohydrate metabolism and transport                                    | 2     | 2     | 2     | 2     | 2     |
| Steroid and sex hormone signaling                                        | 2     | 2     | 2     | 2     | 2     |
| Cellular response to energy deprivation                                  | 2     | 2     | 2     | 2     | 2     |
| TM ion transport involved in membrane potential generation               | 3     | 3     | 3     | 3     | 3     |
| RNA surveillance and degradation                                         | 3     | 3     | 3     | 3     | 3     |
| ECM breakdown                                                            | 3     | 3     | 3     | 3     | 3     |
| TM water and ion transport not involved in membrane potential generation | 4     | 4     | 4     | 4     | 4     |
| Centrosome cycle                                                         | 4     | 4     | 4     | 4     | 4     |
| Actin filament dynamics                                                  | 4     | 4     | 4     | 4     | 4     |
| Endoplasmic reticulum and nuclear envelope organization                  | 5     | 5     | 5     | 5     | 5     |

no1stSD

|                                                                          | MS101 | MS105 | MS106 | MS108 | MS109 |
|--------------------------------------------------------------------------|-------|-------|-------|-------|-------|
| Collagen biosynthesis                                                    | 7     | 1     | 4     | 1     | 1     |
| Carbohydrate metabolism and transport                                    | 2     | 2     | 1     | 9     | 2     |
| Sig. pathways that control cell prol. and diff.                          | 8     | 8     | 3     | 3     | 3     |
| Basement membrane dynamics                                               | 1     | 1     | 4     | 4     | 4     |
| Matricellular protein signaling                                          | 2     | 1     | 1     | 6     | 6     |
| Elastogenesis                                                            | 3     | 3     | 5     | 5     | 5     |
| Cardiomyocyte action potential generation and propagation                | 2     | 2     | 7     | 7     | 7     |
| Control of postsynaptic potential                                        | 5     | 5     | 5     | 5     | 5     |
| Photolytic synthesis                                                     | 1     | 1     | 5     | 10    | 10    |
| Puynergic signaling                                                      | 1     | 1     | 1     | 1     | 1     |
| Cellular response to hypoxia                                             | 1     | 1     | 1     | 2     | 2     |
| Actin filament dynamics                                                  | 3     | 3     | 3     | 3     | 3     |
| Signaling pathways involved in hematopoiesis                             | 3     | 3     | 3     | 3     | 3     |
| Mitochondrial dynamics                                                   | 3     | 3     | 3     | 3     | 3     |
| Metabolism of glutamate and histidine products                           | 3     | 3     | 3     | 3     | 3     |
| Neuronal signaling pathways                                              | 4     | 4     | 4     | 4     | 4     |
| Myofibril formation and organization                                     | 4     | 4     | 4     | 4     | 4     |
| Metabolism and transport of cholesterol, steroids and bile acids         | 4     | 4     | 4     | 4     | 4     |
| TM water and ion transport not involved in membrane potential generation | 5     | 5     | 5     | 5     | 5     |

|                                                                  | MS101 | MS105 | MS106 | MS108 | MS109 |
|------------------------------------------------------------------|-------|-------|-------|-------|-------|
| Matricellular protein signaling                                  | 8     | 2     | 1     | 1     | 6     |
| Cellular response to oxidative stress                            | 10    | 2     | 12    | 3     | 3     |
| Mitotic cell cycle checkpoints                                   | 3     | 1     | 14    | 2     | 2     |
| Collagen biosynthesis                                            | 1     | 1     | 5     | 1     | 1     |
| Centrosome cycle                                                 | 4     | 1     | 4     | 4     | 4     |
| Cytokinesis                                                      | 2     | 6     | 7     | 4     | 4     |
| Complement pathway and regulation                                | 6     | 6     | 4     | 4     | 4     |
| Sig. pathways that control cell prol. and diff.                  | 4     | 10    | 11    | 11    | 11    |
| Basement membrane dynamics                                       | 5     | 10    | 10    | 10    | 10    |
| Signaling pathways involved in hematopoiesis                     | 5     | 11    | 11    | 11    | 11    |
| Chromosome segregation by mitotic spindle                        | 1     | 1     | 1     | 1     | 1     |
| Cellular antioxidant systems                                     | 1     | 1     | 2     | 2     | 2     |
| Myofibril formation and organization                             | 1     | 2     | 2     | 2     | 2     |
| Phase II biotransformation                                       | 3     | 3     | 3     | 3     | 3     |
| Metabolism and transport of cholesterol, steroids and bile acids | 3     | 3     | 3     | 3     | 3     |
| ECM breakdown                                                    | 3     | 3     | 3     | 3     | 3     |
| Amyloid generation and aggregation                               | 4     | 4     | 4     | 4     | 4     |
| Mitochondrial energy production                                  | 4     | 4     | 4     | 4     | 4     |
| Fatty acid metabolism                                            | 5     | 5     | 5     | 5     | 5     |

no1stSD

|                                                          | MS101 | MS105 | MS106 | MS108 | MS109 |
|----------------------------------------------------------|-------|-------|-------|-------|-------|
| Collagen biosynthesis                                    | 2     | 2     | 1     | 1     | 1     |
| Matricellular protein signaling                          | 1     | 1     | 1     | 1     | 1     |
| Chromosome segregation by mitotic spindle                | 4     | 4     | 4     | 4     | 4     |
| ECM breakdown                                            | 4     | 4     | 4     | 4     | 4     |
| Elastogenesis                                            | 4     | 4     | 4     | 4     | 4     |
| Mitotic cell cycle checkpoints                           | 7     | 7     | 7     | 7     | 7     |
| Complement pathway and regulation                        | 1     | 1     | 1     | 1     | 1     |
| Signaling pathways regulating cardiovascular homeostasis | 1     | 1     | 1     | 1     | 1     |
| Thyroid hormone related signaling                        | 1     | 1     | 1     | 1     | 1     |
| Metabolism of hypphoph products                          | 2     | 2     | 2     | 2     | 2     |
| Interphase nucleus and nuclear chromatin organization    | 2     | 2     | 2     | 2     | 2     |
| Protein prenylation                                      | 2     | 2     | 2     | 2     | 2     |
| Cellular response to radiation                           | 3     | 3     | 3     | 3     | 3     |
| Carbohydrate metabolism and transport                    | 3     | 3     | 3     | 3     | 3     |
| Microtubule dynamics                                     | 3     | 3     | 3     | 3     | 3     |
| Apoptosis                                                | 4     | 4     | 4     | 4     | 4     |
| Myofibril formation and organization                     | 4     | 4     | 4     | 4     | 4     |
| Metabolism of fat-soluble vitamins                       | 5     | 5     | 5     | 5     | 5     |

|                                                                          | MS101 | MS105 | MS106 | MS108 | MS109 |
|--------------------------------------------------------------------------|-------|-------|-------|-------|-------|
| Collagen biosynthesis                                                    | 1     | 1     | 1     | 1     | 1     |
| Cellular response to hypoxia                                             | 6     | 6     | 1     | 2     | 2     |
| Sig. pathways that control cell prol. and diff.                          | 4     | 1     | 7     | 7     | 7     |
| Neuronal signaling pathways                                              | 3     | 3     | 6     | 6     | 6     |
| Basement membrane dynamics                                               | 5     | 5     | 5     | 5     | 5     |
| Elastogenesis                                                            | 5     | 5     | 5     | 5     | 5     |
| Matricellular protein signaling                                          | 5     | 5     | 2     | 2     | 2     |
| Myofibril formation and organization                                     | 1     | 1     | 1     | 1     | 1     |
| Intracellular common signaling cascades of multiple pathways             | 1     | 1     | 1     | 1     | 1     |
| Carbohydrate metabolism and transport                                    | 2     | 2     | 2     | 2     | 2     |
| Steroid and sex hormone signaling                                        | 2     | 2     | 2     | 2     | 2     |
| Cellular response to energy deprivation                                  | 2     | 2     | 2     | 2     | 2     |
| TM ion transport involved in membrane potential generation               | 3     | 3     | 3     | 3     | 3     |
| RNA surveillance and degradation                                         | 3     | 3     | 3     | 3     | 3     |
| ECM breakdown                                                            | 3     | 3     | 3     | 3     | 3     |
| TM water and ion transport not involved in membrane potential generation | 4     | 4     | 4     | 4     | 4     |
| Centrosome cycle                                                         | 4     | 4     | 4     | 4     | 4     |
| Actin filament dynamics                                                  | 4     | 4     | 4     | 4     | 4     |
| Endoplasmic reticulum and nuclear envelope organization                  | 5     | 5     | 5     | 5     | 5     |

decomposed

|                                                 | MS101 | MS105 | MS106 | MS108 | MS109 |
|-------------------------------------------------|-------|-------|-------|-------|-------|
| ECM breakdown                                   | 3     | 4     | 4     | 1     | 3     |
| Signaling pathways involved in hematopoiesis    | 4     | 2     | 5     | 4     | 1     |
| Sig. pathways that control cell prol. and diff. | 2     | 5     | 1     | 8     | 6     |
| Matricellular protein signaling                 | 6     | 1     | 3     | 2     | 10    |
| Collagen biosynthesis                           | 1     | 6     | 2     | 5     | 9     |
| Cellular response to hypoxia                    | 7     | 7     | 10    | 3     | 12    |
| Elastogenesis                                   | 5     | 5     | 6     | 5     | 5     |
| Apoptosis                                       | 8     | 8     | 8     | 2     | 2     |
| Signaling by extracellular matrix components    | 3     | 3     | 6     | 6     | 6     |
| Pattern recognition signaling                   | 4     | 4     | 4     | 4     | 4     |

|                                                 | MS101 | MS105 | MS106 | MS108 | MS109 |
|-------------------------------------------------|-------|-------|-------|-------|-------|
| Matricellular protein signaling                 | 1     | 2     | 2     | 1     | 3     |
| Cellular response to hypoxia                    | 4     | 8     | 1     | 3     | 2     |
| Myofibril formation and organization            | 5     | 5     | 9     | 4     | 7     |
| Cellular response to oxidative stress           | 8     | 11    | 5     | 5     | 11    |
| Collagen biosynthesis                           | 1     | 7     | 2     | 1     | 1     |
| ECM breakdown                                   | 3     | 3     | 3     | 14    | 14    |
| Metabolism of fat-soluble vitamins              | 6     | 4     | 4     | 12    | 12    |
| Apoptosis                                       | 12    | 12    | 5     | 5     | 5     |
| Signaling pathways regulating water homeostasis | 2     | 2     | 4     | 4     | 4     |
| Complement pathway and regulation               | 3     | 3     | 10    | 10    | 10    |
| Neuronal signaling pathways                     | 4     | 4     | 4     | 4     | 4     |

decomposed

|                                           | MS101 | MS105 | MS106 | MS108 | MS109 |
|-------------------------------------------|-------|-------|-------|-------|-------|
| Matricellular protein signaling           | 11    | 1     | 2     | 6     | 4     |
| Chromosome segregation by mitotic spindle | 8     | 1     | 1     | 1     | 1     |
| Mitotic cell cycle checkpoints            | 12    | 4     | 2     | 2     | 2     |
| ECM breakdown                             | 1     | 7     | 8     | 11    | 7     |
| Cellular response to oxidative stress     | 4     | 7     | 6     | 10    | 10    |
| Collagen biosynthesis                     | 3     | 3     | 7     | 7     | 11    |
| Elastogenesis                             | 5     | 5     | 10    | 9     | 9     |
| Microtubule dynamics                      | 3     | 3     | 4     | 3     | 3     |
| Cytokinesis                               | 6     | 6     | 5     | 6     | 6     |
| Proteoglycan synthesis                    | 4     | 4     | 9     | 8     | 5     |
| Centrosome cycle                          | 14    | 3     | 5     | 5     | 5     |
| Complement pathway and regulation         | 2     | 2     | 9     | 9     | 9     |
| Interferon signaling                      | 2     | 2     | 2     | 2     | 2     |
| Carbohydrate metabolism and transport     | 3     | 3     | 3     | 3     | 3     |
| Rolling cell adhesion                     | 5     | 5     | 5     | 5     | 5     |

|                                                                  | MS101 | MS105 | MS106 | MS108 | MS109 |
|------------------------------------------------------------------|-------|-------|-------|-------|-------|
| ECM breakdown                                                    | 1     | 10    | 1     | 4     | 4     |
| Metabolism of non-essential amino acids                          | 2     | 4     | 3     | 8     | 8     |
| ECM breakdown                                                    | 4     | 6     | 13    | 13    | 9     |
| Cellular response to hypoxia                                     | 1     | 6     | 5     | 2     | 1     |
| Matricellular protein signaling                                  | 7     | 5     | 2     | 1     | 1     |
| Carbohydrate metabolism and transport                            | 2     | 9     | 6     | 6     | 6     |
| Interferon signaling                                             | 5     | 2     | 3     | 3     | 3     |
| Myofibril formation and organization                             | 3     | 7     | 3     | 3     | 3     |
| Metabolism of fat-soluble vitamins                               | 8     | 4     | 5     | 5     | 5     |
| Metabolism and transport of cholesterol, steroids and bile acids | 11    | 11    | 11    | 11    | 11    |
| Sig. pathways that control cell prol. and diff.                  | 3     | 3     | 3     | 3     | 3     |
| Complement pathway and regulation                                | 5     | 5     | 5     | 5     | 5     |

**MBCOL2**  
**isoprenaline**  
(is c.toxic: nd)

**MBCOL2**  
**milrinone**  
(is c.toxic: nd)

**Upregulated**

**Downregulated**

**Upregulated**

**Downregulated**

complete

|                                                                  | MS101 | MS105 | MS106 | MS108 | MS109 |
|------------------------------------------------------------------|-------|-------|-------|-------|-------|
| Collagen biosynthesis                                            | 1     | 1     | 4     | 4     | 4     |
| Myofibril formation and organization                             | 1     | 5     | 4     | 4     | 4     |
| Sig. pathways that control cell prol. and diff.                  | 6     | 6     | 1     | 1     | 1     |
| Elastogenesis                                                    | 5     | 5     | 2     | 2     | 2     |
| Basement membrane dynamics                                       | 4     | 4     | 8     | 8     | 8     |
| Matricellular protein signaling                                  | 10    | 3     | 3     | 3     | 3     |
| Cellular response to hypoxia                                     | 12    | 2     | 2     | 2     | 2     |
| ECM breakdown                                                    | 1     | 1     | 4     | 4     | 4     |
| Eukaryotic DNA replication                                       | 1     | 1     | 1     | 1     | 1     |
| Metabolism and transport of cholesterol, steroids and bile acids | 2     | 2     | 2     | 2     | 2     |
| Actin filament dynamics                                          | 2     | 2     | 3     | 3     | 3     |
| Control of postsynaptic potential                                | 3     | 3     | 3     | 3     | 3     |
| Apoptosis                                                        | 3     | 3     | 3     | 3     | 3     |
| Cardiomyocyte action potential generation and propagation        | 3     | 3     | 4     | 4     | 4     |
| Steroid and sex hormone signaling                                | 4     | 4     | 5     | 5     | 5     |
| Cell-matrix adhesion                                             | 5     | 5     | 5     | 5     | 5     |

|                      | MS101 | MS105 | MS106 | MS108 | MS109 |
|----------------------|-------|-------|-------|-------|-------|
| Cardiomyocyte action |       |       |       |       |       |



**MBCOL2  
phenylephrine**  
(is c.toxic: nd)

**MBCOL2  
verapamil**  
(is c.toxic: nd)

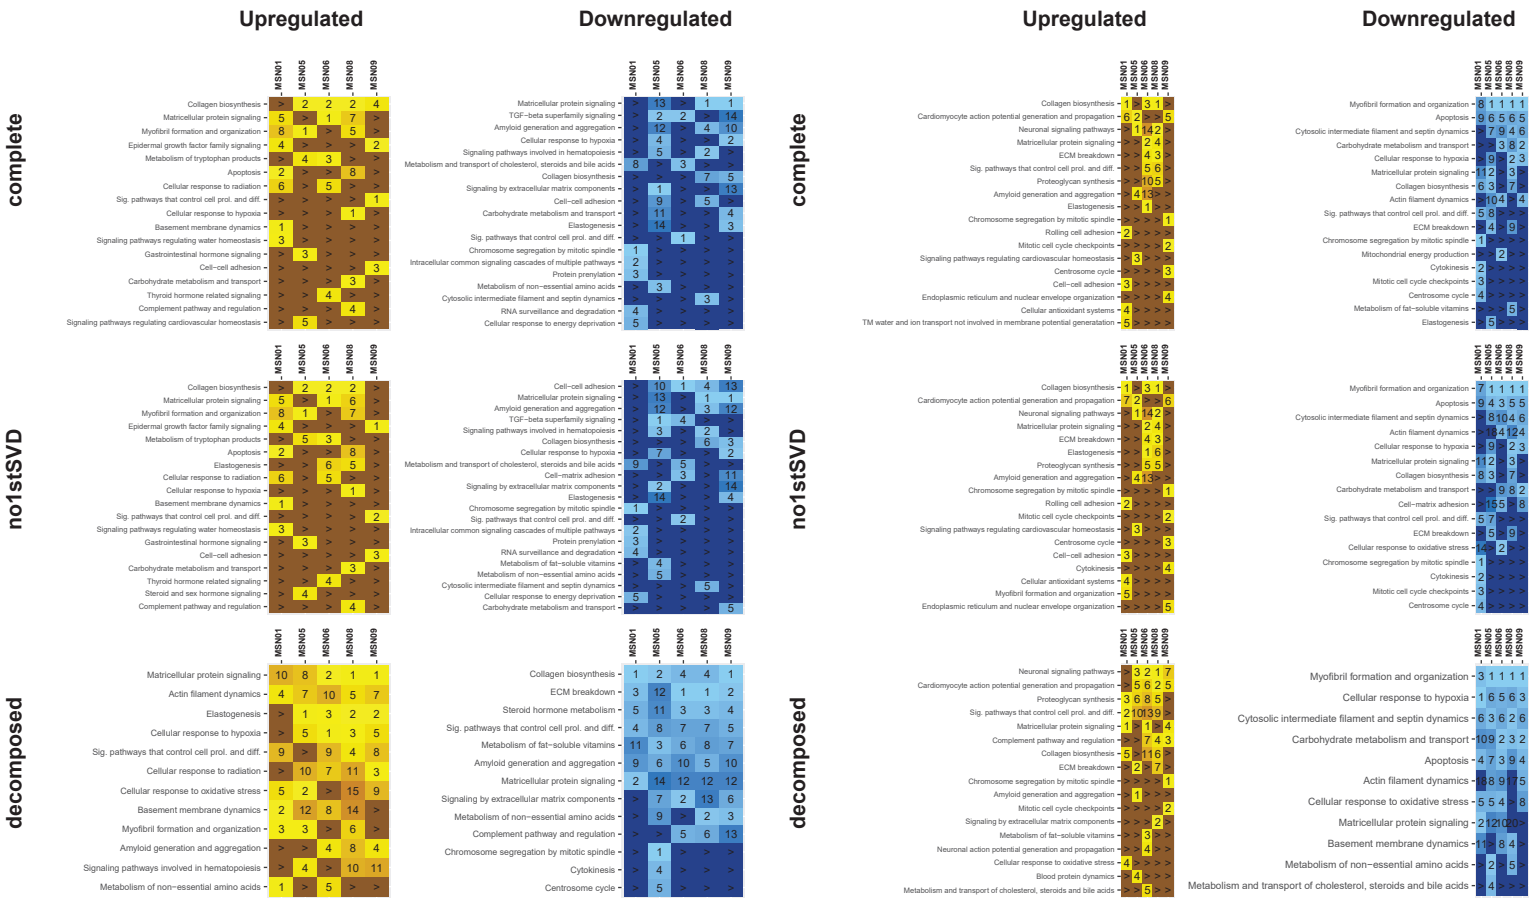

**MBCOL2  
azacitidine**  
(is c.toxic: nd)

**MBCOL2  
bortezomib**  
(is c.toxic: yes)

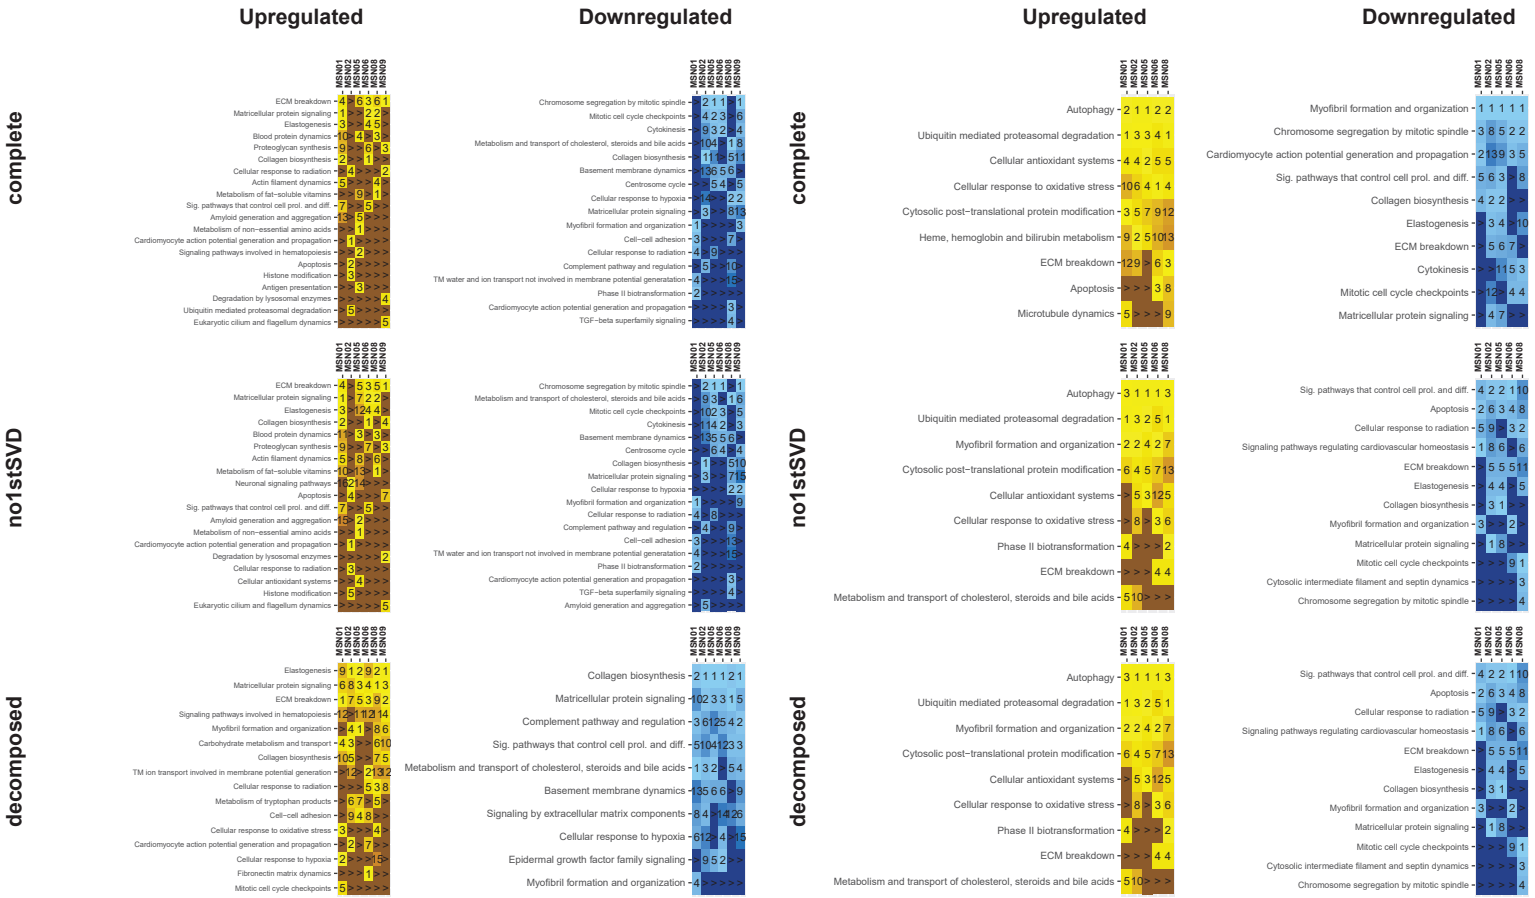

**MBCOL2  
carfilzomib  
(is c.toxic: yes)**

**MBCOL2  
cyclosporine  
(is c.toxic: nd)**

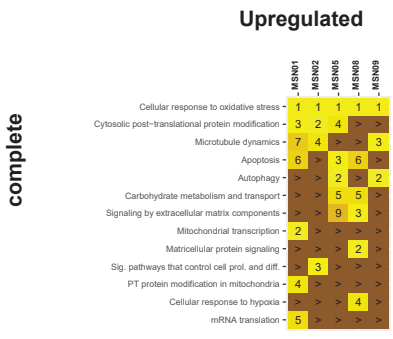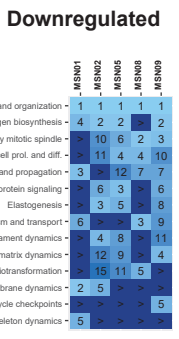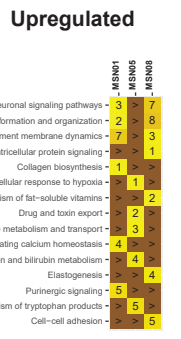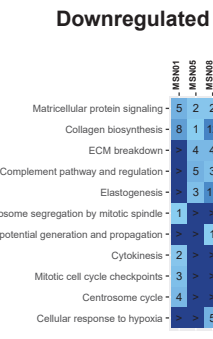

**complete**

**complete**

**no1stSVD**

**no1stSVD**

**decomposed**

**decomposed**

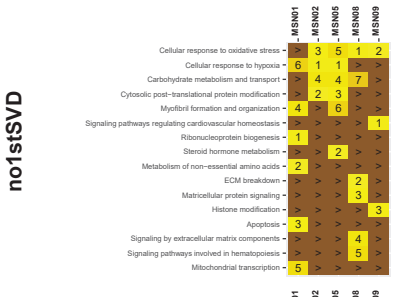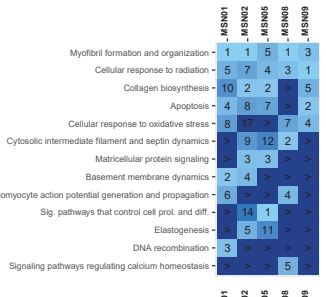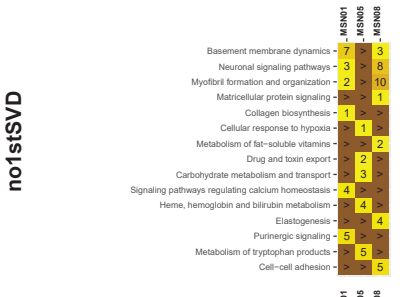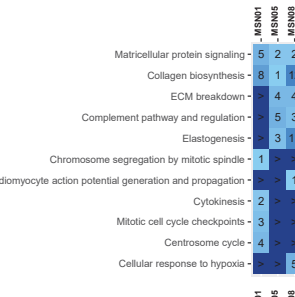

**MBCOL2  
decitabine  
(is c.toxic: nd)**

**MBCOL2  
delavirdine  
(is c.toxic: nd)**

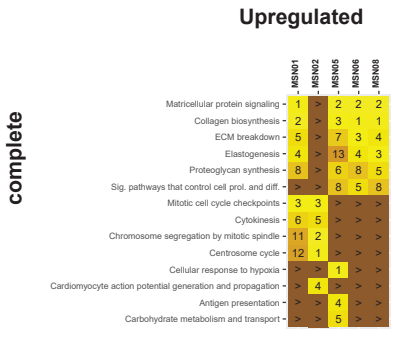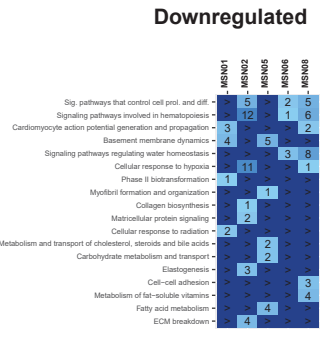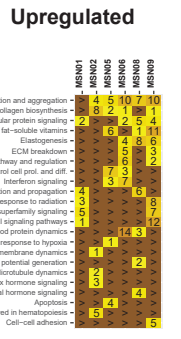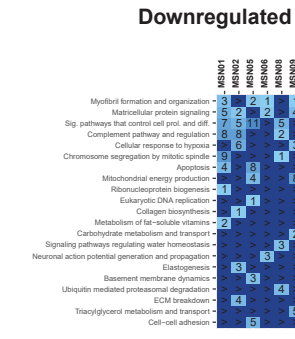

**complete**

**complete**

**no1stSVD**

**no1stSVD**

**decomposed**

**decomposed**

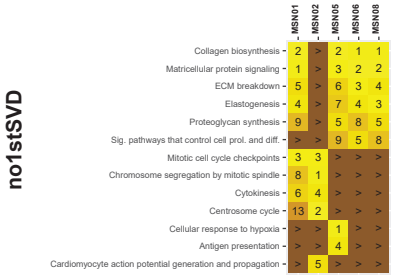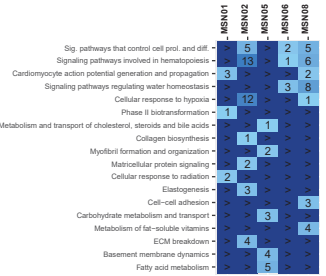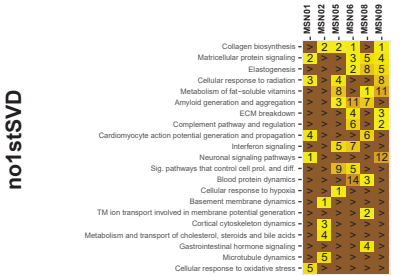

**MBCOL2  
diclofenac**  
(is c.toxic: nd)

**MBCOL2  
endothelin-1**  
(is c.toxic: nd)

**Upregulated**

**Downregulated**

**Upregulated**

**Downregulated**

**complete**

|                                                           | MS101 | MS102 | MS103 | MS104 | MS105 | MS106 | MS107 | MS108 | MS109 |
|-----------------------------------------------------------|-------|-------|-------|-------|-------|-------|-------|-------|-------|
| Basement membrane dynamics                                | 5     | 10    | 10    | 8     |       |       |       |       |       |
| Sig. pathways that control cell prol. and diff.           | 3     | 6     | 9     | 3     |       |       |       |       |       |
| Collagen biosynthesis                                     | 2     | 1     | 1     | 1     |       |       |       |       |       |
| Matricellular protein signaling                           | 3     | 3     | 2     | 2     |       |       |       |       |       |
| ECM breakdown                                             | 1     | 4     | 3     | 3     |       |       |       |       |       |
| Elastogenesis                                             | 4     | 4     | 4     | 4     |       |       |       |       |       |
| Complement pathway and regulation                         | 7     | 2     | 5     | 5     |       |       |       |       |       |
| Proteoglycan synthesis                                    | 7     | 7     | 5     | 5     |       |       |       |       |       |
| Cardiomyocyte action potential generation and propagation | 2     | 2     | 1     | 1     |       |       |       |       |       |
| Cell-cell adhesion                                        | 10    | 2     | 2     | 2     |       |       |       |       |       |
| Neuronal signaling pathways                               | 1     | 1     | 1     | 1     |       |       |       |       |       |
| Cellular response to hypoxia                              | 2     | 2     | 2     | 2     |       |       |       |       |       |
| Cellular response to oxidative stress                     | 3     | 4     | 5     | 5     |       |       |       |       |       |
| Metabolism of fat-soluble vitamins                        | 5     | 5     | 5     | 5     |       |       |       |       |       |
| Control of postsynaptic potential                         | 2     | 2     | 2     | 2     |       |       |       |       |       |

|                                                           | MS101 | MS102 | MS103 | MS104 | MS105 | MS106 | MS107 | MS108 | MS109 |
|-----------------------------------------------------------|-------|-------|-------|-------|-------|-------|-------|-------|-------|
| Sig. pathways that control cell prol. and diff.           | 2     | 2     | 2     | 2     |       |       |       |       |       |
| Matricellular protein signaling                           | 2     | 2     | 2     | 2     |       |       |       |       |       |
| Signaling pathways regulating water homeostasis           | 1     | 1     | 1     | 1     |       |       |       |       |       |
| Cellular response to hypoxia                              | 1     | 1     | 1     | 1     |       |       |       |       |       |
| Neuronal signaling pathways                               | 3     | 3     | 2     | 2     |       |       |       |       |       |
| Mitochondrial energy production                           | 3     | 4     | 3     | 3     |       |       |       |       |       |
| ECM breakdown                                             | 3     | 1     | 1     | 1     |       |       |       |       |       |
| Apoptosis                                                 | 1     | 1     | 1     | 1     |       |       |       |       |       |
| Thyroid hormone related signaling                         | 1     | 1     | 1     | 1     |       |       |       |       |       |
| Cell-matrix adhesion                                      | 1     | 1     | 1     | 1     |       |       |       |       |       |
| Collagen biosynthesis                                     | 1     | 1     | 1     | 1     |       |       |       |       |       |
| Cellular response to radiation                            | 1     | 1     | 1     | 1     |       |       |       |       |       |
| Cardiomyocyte action potential generation and propagation | 2     | 2     | 1     | 1     |       |       |       |       |       |
| PT protein modification in mitochondria                   | 2     | 2     | 2     | 2     |       |       |       |       |       |
| Myofibril formation and organization                      | 2     | 2     | 2     | 2     |       |       |       |       |       |
| Ribonucleoprotein biogenesis                              | 3     | 3     | 3     | 3     |       |       |       |       |       |
| Metabolism of fat-soluble vitamins                        | 3     | 3     | 3     | 3     |       |       |       |       |       |
| Carbohydrate metabolism and transport                     | 3     | 3     | 3     | 3     |       |       |       |       |       |
| Signaling pathways involved in hematopoiesis              | 3     | 4     | 4     | 4     |       |       |       |       |       |
| Cell-cell adhesion                                        | 4     | 4     | 4     | 4     |       |       |       |       |       |
| Actin filament dynamics                                   | 4     | 4     | 4     | 4     |       |       |       |       |       |
| Microtubule organization center dynamics                  | 4     | 4     | 4     | 4     |       |       |       |       |       |
| Complement pathway and regulation                         | 5     | 5     | 5     | 5     |       |       |       |       |       |

**complete**

|                                                                  | MS101 | MS102 | MS103 | MS104 | MS105 | MS106 | MS107 | MS108 | MS109 |
|------------------------------------------------------------------|-------|-------|-------|-------|-------|-------|-------|-------|-------|
| Carbohydrate metabolism and transport                            | 5     | 1     | 1     | 2     |       |       |       |       |       |
| Matricellular protein signaling                                  | 10    | 2     | 2     | 2     |       |       |       |       |       |
| ECM breakdown                                                    | 6     | 3     | 3     | 3     |       |       |       |       |       |
| Metabolism of non-essential amino acids                          | 7     | 2     | 2     | 2     |       |       |       |       |       |
| Myofibril formation and organization                             | 13    | 3     | 3     | 3     |       |       |       |       |       |
| Cellular response to hypoxia                                     | 5     | 2     | 2     | 2     |       |       |       |       |       |
| Elastogenesis                                                    | 4     | 4     | 4     | 4     |       |       |       |       |       |
| Collagen biosynthesis                                            | 7     | 7     | 7     | 7     |       |       |       |       |       |
| Cardiomyocyte action potential generation and propagation        | 4     | 4     | 4     | 4     |       |       |       |       |       |
| Signaling pathways regulating water homeostasis                  | 3     | 3     | 3     | 3     |       |       |       |       |       |
| Sig. pathways that control cell prol. and diff.                  | 5     | 5     | 5     | 5     |       |       |       |       |       |
| Fatty acid metabolism                                            | 11    | 4     | 4     | 4     |       |       |       |       |       |
| Metabolism and transport of cholesterol, steroids and bile acids | 3     | 1     | 1     | 1     |       |       |       |       |       |
| Actin filament dynamics                                          | 2     | 2     | 2     | 2     |       |       |       |       |       |
| Complement pathway and regulation                                | 5     | 5     | 5     | 5     |       |       |       |       |       |

|                                                              | MS101 | MS102 | MS103 | MS104 | MS105 | MS106 | MS107 | MS108 | MS109 |
|--------------------------------------------------------------|-------|-------|-------|-------|-------|-------|-------|-------|-------|
| ECM breakdown                                                | 5     | 3     | 4     | 9     |       |       |       |       |       |
| Collagen biosynthesis                                        | 1     | 1     | 1     | 1     |       |       |       |       |       |
| Apoptosis                                                    | 10    | 2     | 1     | 1     |       |       |       |       |       |
| Amayloid generation and aggregation                          | 1     | 1     | 1     | 1     |       |       |       |       |       |
| Elastogenesis                                                | 5     | 7     | 7     | 7     |       |       |       |       |       |
| Matricellular protein signaling                              | 2     | 2     | 2     | 2     |       |       |       |       |       |
| Cardiomyocyte action potential generation and propagation    | 2     | 2     | 2     | 2     |       |       |       |       |       |
| Sig. pathways that control cell prol. and diff.              | 4     | 3     | 3     | 3     |       |       |       |       |       |
| Chromosome segregation by mitotic spindle                    | 1     | 1     | 1     | 1     |       |       |       |       |       |
| Neuronal action potential generation and propagation         | 3     | 3     | 3     | 3     |       |       |       |       |       |
| Intracellular common signaling cascades of multiple pathways | 3     | 3     | 3     | 3     |       |       |       |       |       |
| TM ion transport involved in membrane potential generation   | 4     | 4     | 4     | 4     |       |       |       |       |       |
| Phase II biotransformation                                   | 5     | 5     | 5     | 5     |       |       |       |       |       |

**no1stSVD**

|                                                           | MS101 | MS102 | MS103 | MS104 | MS105 | MS106 | MS107 | MS108 | MS109 |
|-----------------------------------------------------------|-------|-------|-------|-------|-------|-------|-------|-------|-------|
| Basement membrane dynamics                                | 4     | 3     | 12    | 11    | 8     |       |       |       |       |
| Collagen biosynthesis                                     | 2     | 1     | 1     | 1     |       |       |       |       |       |
| Matricellular protein signaling                           | 3     | 3     | 2     | 2     |       |       |       |       |       |
| ECM breakdown                                             | 1     | 4     | 3     | 3     |       |       |       |       |       |
| Elastogenesis                                             | 8     | 5     | 4     | 4     |       |       |       |       |       |
| Complement pathway and regulation                         | 6     | 2     | 5     | 5     |       |       |       |       |       |
| Sig. pathways that control cell prol. and diff.           | 3     | 6     | 9     | 3     |       |       |       |       |       |
| Proteoglycan synthesis                                    | 10    | 7     | 5     | 5     |       |       |       |       |       |
| Cardiomyocyte action potential generation and propagation | 2     | 1     | 1     | 1     |       |       |       |       |       |
| Cell-cell adhesion                                        | 10    | 2     | 2     | 2     |       |       |       |       |       |
| Cellular response to hypoxia                              | 10    | 2     | 2     | 2     |       |       |       |       |       |
| Cellular response to oxidative stress                     | 3     | 4     | 4     | 4     |       |       |       |       |       |
| Metabolism of fat-soluble vitamins                        | 5     | 5     | 5     | 5     |       |       |       |       |       |
| Control of postsynaptic potential                         | 2     | 2     | 2     | 2     |       |       |       |       |       |
| Actin filament dynamics                                   | 5     | 5     | 5     | 5     |       |       |       |       |       |

|                                                           | MS101 | MS102 | MS103 | MS104 | MS105 | MS106 | MS107 | MS108 | MS109 |
|-----------------------------------------------------------|-------|-------|-------|-------|-------|-------|-------|-------|-------|
| Sig. pathways that control cell prol. and diff.           | 2     | 2     | 2     | 2     |       |       |       |       |       |
| Matricellular protein signaling                           | 2     | 2     | 2     | 2     |       |       |       |       |       |
| Signaling pathways regulating water homeostasis           | 1     | 1     | 1     | 1     |       |       |       |       |       |
| Cellular response to hypoxia                              | 1     | 1     | 1     | 1     |       |       |       |       |       |
| Neuronal signaling pathways                               | 3     | 3     | 2     | 2     |       |       |       |       |       |
| Mitochondrial energy production                           | 3     | 4     | 3     | 3     |       |       |       |       |       |
| ECM breakdown                                             | 3     | 1     | 1     | 1     |       |       |       |       |       |
| Cell-matrix adhesion                                      | 1     | 1     | 1     | 1     |       |       |       |       |       |
| Collagen biosynthesis                                     | 1     | 1     | 1     | 1     |       |       |       |       |       |
| Cellular response to radiation                            | 1     | 1     | 1     | 1     |       |       |       |       |       |
| Cardiomyocyte action potential generation and propagation | 2     | 2     | 1     | 1     |       |       |       |       |       |
| Ribonucleoprotein biogenesis                              | 2     | 2     | 2     | 2     |       |       |       |       |       |
| PT protein modification in mitochondria                   | 2     | 2     | 2     | 2     |       |       |       |       |       |
| Cellular response to oxidative stress                     | 2     | 2     | 2     | 2     |       |       |       |       |       |
| Metabolism of fat-soluble vitamins                        | 3     | 3     | 3     | 3     |       |       |       |       |       |
| Ubiquitin mediated proteasomal degradation                | 3     | 3     | 3     | 3     |       |       |       |       |       |
| Signaling pathways involved in hematopoiesis              | 3     | 4     | 4     | 4     |       |       |       |       |       |
| Cell-cell adhesion                                        | 4     | 4     | 4     | 4     |       |       |       |       |       |
| Microtubule organization center dynamics                  | 4     | 4     | 4     | 4     |       |       |       |       |       |
| Complement pathway and regulation                         | 5     | 5     | 5     | 5     |       |       |       |       |       |

**no1stSVD**

|                                                                  | MS101 | MS102 | MS103 | MS104 | MS105 | MS106 | MS107 | MS108 | MS109 |
|------------------------------------------------------------------|-------|-------|-------|-------|-------|-------|-------|-------|-------|
| Carbohydrate metabolism and transport                            | 3     | 1     | 1     | 2     |       |       |       |       |       |
| Matricellular protein signaling                                  | 10    | 2     | 2     | 2     |       |       |       |       |       |
| ECM breakdown                                                    | 6     | 3     | 3     | 3     |       |       |       |       |       |
| Metabolism of non-essential amino acids                          | 7     | 2     | 2     | 2     |       |       |       |       |       |
| Myofibril formation and organization                             | 13    | 3     | 3     | 3     |       |       |       |       |       |
| Cellular response to hypoxia                                     | 5     | 2     | 2     | 2     |       |       |       |       |       |
| Elastogenesis                                                    | 4     | 4     | 4     | 4     |       |       |       |       |       |
| Collagen biosynthesis                                            | 7     | 7     | 7     | 7     |       |       |       |       |       |
| Cardiomyocyte action potential generation and propagation        | 3     | 4     | 5     | 5     |       |       |       |       |       |
| Signaling pathways regulating water homeostasis                  | 3     | 3     | 3     | 3     |       |       |       |       |       |
| Sig. pathways that control cell prol. and diff.                  | 5     | 5     | 5     | 5     |       |       |       |       |       |
| Fatty acid metabolism                                            | 15    | 3     | 3     | 3     |       |       |       |       |       |
| Metabolism and transport of cholesterol, steroids and bile acids | 3     | 1     | 1     | 1     |       |       |       |       |       |
| Actin filament dynamics                                          | 2     | 2     | 2     | 2     |       |       |       |       |       |
| Complement pathway and regulation                                | 5     | 5     | 5     | 5     |       |       |       |       |       |

|                                                            | MS101 | MS102 | MS103 | MS104 | MS105 | MS106 | MS107 | MS108 | MS109 |
|------------------------------------------------------------|-------|-------|-------|-------|-------|-------|-------|-------|-------|
| ECM breakdown                                              | 5     | 3     | 5     | 8     |       |       |       |       |       |
| Collagen biosynthesis                                      | 1     | 1     | 2     | 4     |       |       |       |       |       |
| Amayloid generation and aggregation                        | 1     | 1     | 1     | 1     |       |       |       |       |       |
| Elastogenesis                                              | 5     | 4     | 7     | 7     |       |       |       |       |       |
| Complement pathway and regulation                          | 6     | 6     | 6     | 6     |       |       |       |       |       |
| Matricellular protein signaling                            | 2     | 2     | 2     | 2     |       |       |       |       |       |
| Cardiomyocyte action potential generation and propagation  | 1     | 3     | 3     | 3     |       |       |       |       |       |
| Sig. pathways that control cell prol. and diff.            | 4     | 3     | 3     | 3     |       |       |       |       |       |
| Chromosome segregation by mitotic spindle                  | 2     | 2     | 2     | 2     |       |       |       |       |       |
| Neuronal action potential generation and propagation       | 3     | 3     | 3     | 3     |       |       |       |       |       |
| TM ion transport involved in membrane potential generation | 4     | 4     | 4     | 4     |       |       |       |       |       |
| Phase II biotransformation                                 | 4     | 4     | 4     | 4     |       |       |       |       |       |

**decomposed**

|                                                           | MS101 | MS102 | MS103 | MS104 | MS105 | MS106 | MS107 | MS108 | MS109 |
|-----------------------------------------------------------|-------|-------|-------|-------|-------|-------|-------|-------|-------|
| Matricellular protein signaling                           | 2     | 1     | 2     | 1     | 1     |       |       |       |       |
| Collagen biosynthesis                                     | 1     | 2     | 1     | 2     | 3     |       |       |       |       |
| Cardiomyocyte action potential generation and propagation | 3     | 4     | 6     | 5     | 2     |       |       |       |       |
| Elastogenesis                                             | 4     | 5     | 3     | 3     | 2     |       |       |       |       |
| Cellular response to oxidative stress                     | 3     | 8     | 4     | 4     | 3     |       |       |       |       |
| Sig. pathways that control cell prol. and diff.           | 1     | 12    | 4     | 12    | 13    |       |       |       |       |
| Amayloid generation and aggregation                       | 5     | 12    | 5     | 14    | 14    |       |       |       |       |
| Signaling pathways regulating cardiovascular homeostasis  | 5     | 5     | 5     | 5     | 12    |       |       |       |       |

|                                                                  | MS101 | MS102 | MS103 | MS104 | MS105 | MS106 | MS107 | MS108 | MS109 |
|------------------------------------------------------------------|-------|-------|-------|-------|-------|-------|-------|-------|-------|
| Cellular response to hypoxia                                     | 1     | 1     | 1     | 1     | 1     |       |       |       |       |
| Collagen biosynthesis                                            | 2     | 3     | 2     | 10    | 4     |       |       |       |       |
| Sig. pathways that control cell prol. and diff.                  | 7     | 2     | 2     | 4     | 2     |       |       |       |       |
| Cellular response to radiation                                   | 4     | 6     | 3     | 3     | 5     |       |       |       |       |
| Proteoglycan synthesis                                           | 5     | 7     | 5     | 4     | 6     |       |       |       |       |
| Metabolism of fat-soluble vitamins                               | 10    | 10    | 9     | 2     | 2     |       |       |       |       |
| Matricellular protein signaling                                  | 3     | 4     | 4     | 4     | 2     |       |       |       |       |
| Metabolism and transport of cholesterol, steroids and bile acids | 8     | 7     | 5     | 3     | 3     |       |       |       |       |
| ECM breakdown                                                    | 1     | 11    | 3     | 1     | 3     |       |       |       |       |
| Myofibril formation and organization                             | 5     | 12    | 9     | 9     | 9     |       |       |       |       |
| Signaling pathways involved in hematopoiesis                     | 11    | 13    | 13    | 3     | 3     |       |       |       |       |
| Signaling by extracellular matrix components                     | 5     | 5     | 5     | 5     | 5     |       |       |       |       |

**decomposed**

|                                                                  | MS101 | MS102 | MS103 | MS104 | MS105 | MS106 | MS107 | MS108 | MS109 |
|------------------------------------------------------------------|-------|-------|-------|-------|-------|-------|-------|-------|-------|
| Collagen biosynthesis                                            | 2     | 5     | 2     | 4     | 3     |       |       |       |       |
| Matricellular protein signaling                                  | 8     | 2     | 5     | 2     | 15    |       |       |       |       |
| Complement pathway and regulation                                | 10    | 10    | 3     | 9     | 9     |       |       |       |       |
| Apoptosis                                                        | 5     | 4     | 9     | 5     | 12    |       |       |       |       |
| Metabolism and transport of cholesterol, steroids and bile acids | 1     | 1     | 1     | 1     | 2     |       |       |       |       |
| Cellular response to hypoxia                                     | 3     | 1     | 4     | 3     | 1     |       |       |       |       |
| Chromosome segregation by mitotic spindle                        | 7     | 3     | 3     | 1     | 1     |       |       |       |       |
| Cytokinesis                                                      | 4     | 6     | 5     | 5     | 5     |       |       |       |       |
| Mitotic cell cycle checkpoints                                   | 4     | 4     | 6     | 4     | 6     |       |       |       |       |

|                                                 | MS101 | MS102 | MS103 | MS104 | MS105 | MS106 | MS107 | MS108 | MS109 |
|-------------------------------------------------|-------|-------|-------|-------|-------|-------|-------|-------|-------|
| Collagen biosynthesis                           | 1     | 1     | 1     | 1     | 1     |       |       |       |       |
| Sig. pathways that control cell prol. and diff. | 2     | 5     | 4     | 3     | 5     |       |       |       |       |
| Elastogenesis                                   | 4     | 9     | 2     | 2     | 2     |       |       |       |       |
| Signaling by extracellular matrix components    | 4     | 7     | 6     | 5     | 8     |       |       |       |       |
| Metabolism of non-essential amino acids         | 3     | 6     | 5     | 8     | 8     |       |       |       |       |
| Amayloid generation and aggregation             | 3     | 12    | 7     | 3     | 4     |       |       |       |       |
| Cellular response to oxidative stress           | 5     | 9     | 6     | 6     | 6     |       |       |       |       |



**MBCOL2**  
saxagliptin  
(is c.toxic: nd)

**MBCOL2**  
tnf-alpha  
(is c.toxic: nd)

complete

no1stSD

decomposed

**Upregulated**

|                                                 | MSNO1 | MSNO2 | MSNO3 | MSNO4 | MSNO5 | MSNO6 | MSNO7 | MSNO8 | MSNO9 |
|-------------------------------------------------|-------|-------|-------|-------|-------|-------|-------|-------|-------|
| ECM breakdown                                   | -4    | 1     | 2     | 1     | 1     | 1     | 1     | 1     | 1     |
| Collagen biosynthesis                           | -10   | 1     | 2     | 1     | 1     | 1     | 1     | 1     | 1     |
| Elastogenesis                                   | -4    | 4     | 4     | 4     | 4     | 4     | 4     | 4     | 4     |
| Matricellular protein signaling                 | -2    | 3     | 3     | 3     | 3     | 3     | 3     | 3     | 3     |
| Metabolism of fat-soluble vitamins              | -7    | 1     | 1     | 1     | 1     | 1     | 1     | 1     | 1     |
| Complement pathway and regulation               | -3    | 5     | 5     | 5     | 5     | 5     | 5     | 5     | 5     |
| Signaling pathways involved in hematopoiesis    | -1    | 9     | 9     | 9     | 9     | 9     | 9     | 9     | 9     |
| Fibronectin matrix dynamics                     | -13   | 4     | 4     | 4     | 4     | 4     | 4     | 4     | 4     |
| Steroid hormone metabolism                      | -15   | 5     | 5     | 5     | 5     | 5     | 5     | 5     | 5     |
| Ubiquitin mediated proteasomal degradation      | -1    | >>    | >>    | >>    | >>    | >>    | >>    | >>    | >>    |
| Cellular response to oxidative stress           | -2    | >>    | >>    | >>    | >>    | >>    | >>    | >>    | >>    |
| Basement membrane dynamics                      | ->    | 3     | 3     | 3     | 3     | 3     | 3     | 3     | 3     |
| Signaling pathways regulating water homeostasis | ->    | 3     | 3     | 3     | 3     | 3     | 3     | 3     | 3     |
| Myofibril formation and organization            | -3    | >>    | >>    | >>    | >>    | >>    | >>    | >>    | >>    |
| Apoptosis                                       | -5    | >>    | >>    | >>    | >>    | >>    | >>    | >>    | >>    |

|                                                 | MSNO1 | MSNO2 | MSNO3 | MSNO4 | MSNO5 | MSNO6 | MSNO7 | MSNO8 | MSNO9 |
|-------------------------------------------------|-------|-------|-------|-------|-------|-------|-------|-------|-------|
| Collagen biosynthesis                           | -7    | 4     | 4     | 4     | 4     | 4     | 4     | 4     | 4     |
| ECM breakdown                                   | -8    | 5     | 5     | 5     | 5     | 5     | 5     | 5     | 5     |
| Elastogenesis                                   | -4    | 4     | 4     | 4     | 4     | 4     | 4     | 4     | 4     |
| Sig. pathways that control cell prol. and diff. | -1    | 9     | 9     | 9     | 9     | 9     | 9     | 9     | 9     |
| Matricellular protein signaling                 | -2    | 4     | 4     | 4     | 4     | 4     | 4     | 4     | 4     |
| Metabolism of fat-soluble vitamins              | -7    | 1     | 1     | 1     | 1     | 1     | 1     | 1     | 1     |
| Complement pathway and regulation               | -3    | 5     | 5     | 5     | 5     | 5     | 5     | 5     | 5     |
| Signaling pathways involved in hematopoiesis    | -2    | 8     | 8     | 8     | 8     | 8     | 8     | 8     | 8     |
| Fibronectin matrix dynamics                     | -13   | 4     | 4     | 4     | 4     | 4     | 4     | 4     | 4     |
| Steroid hormone metabolism                      | -15   | 5     | 5     | 5     | 5     | 5     | 5     | 5     | 5     |
| Ubiquitin mediated proteasomal degradation      | -1    | >>    | >>    | >>    | >>    | >>    | >>    | >>    | >>    |
| Myofibril formation and organization            | ->    | 3     | 3     | 3     | 3     | 3     | 3     | 3     | 3     |
| Basement membrane dynamics                      | ->    | 3     | 3     | 3     | 3     | 3     | 3     | 3     | 3     |
| Signaling pathways regulating water homeostasis | ->    | 3     | 3     | 3     | 3     | 3     | 3     | 3     | 3     |
| Cellular response to oxidative stress           | -3    | >>    | >>    | >>    | >>    | >>    | >>    | >>    | >>    |
| Phase II biotransformation                      | -4    | >>    | >>    | >>    | >>    | >>    | >>    | >>    | >>    |
| Microtubule dynamics                            | -5    | >>    | >>    | >>    | >>    | >>    | >>    | >>    | >>    |

|                                         | MSNO1 | MSNO2 | MSNO3 | MSNO4 | MSNO5 | MSNO6 | MSNO7 | MSNO8 | MSNO9 |
|-----------------------------------------|-------|-------|-------|-------|-------|-------|-------|-------|-------|
| Complement pathway and regulation       | -3    | 1     | 4     | 8     | 1     | 1     | 1     | 1     | 1     |
| Metabolism of non-essential amino acids | -5    | 3     | 2     | 3     | 6     | 6     | 6     | 6     | 6     |
| Apoptosis                               | -1    | 7     | 9     | 1     | 3     | 3     | 3     | 3     | 3     |
| Collagen biosynthesis                   | -6    | 5     | 4     | 4     | 4     | 4     | 4     | 4     | 4     |
| Eukaryotic DNA replication              | -4    | 2     | 1     | 5     | 5     | 5     | 5     | 5     | 5     |
| ECM breakdown                           | -7    | 8     | 3     | 9     | 9     | 9     | 9     | 9     | 9     |
| Cellular response to hypoxia            | -2    | 4     | >>    | 2     | 2     | 2     | 2     | 2     | 2     |
| Matricellular protein signaling         | -6    | 3     | >>    | 2     | 2     | 2     | 2     | 2     | 2     |
| TGF-beta superfamily signaling          | -10   | >>    | 5     | 5     | 5     | 5     | 5     | 5     | 5     |

**Downregulated**

|                                                           | MSNO1 | MSNO2 | MSNO3 | MSNO4 | MSNO5 | MSNO6 | MSNO7 | MSNO8 | MSNO9 |
|-----------------------------------------------------------|-------|-------|-------|-------|-------|-------|-------|-------|-------|
| Cardiomyocyte action potential generation and propagation | -1    | 1     | 2     | 8     | 8     | 8     | 8     | 8     | 8     |
| Matricellular protein signaling                           | -2    | 2     | 2     | 2     | 2     | 2     | 2     | 2     | 2     |
| Cellular response to hypoxia                              | -1    | 4     | 4     | 4     | 4     | 4     | 4     | 4     | 4     |
| Sig. pathways that control cell prol. and diff.           | -2    | 5     | >>    | 1     | 1     | 1     | 1     | 1     | 1     |
| Signaling pathways involved in hematopoiesis              | -1    | 3     | 3     | 3     | 3     | 3     | 3     | 3     | 3     |
| Amyloid generation and aggregation                        | -9    | 5     | 5     | 5     | 5     | 5     | 5     | 5     | 5     |
| Cell-matrix adhesion                                      | -14   | >>    | 3     | 3     | 3     | 3     | 3     | 3     | 3     |
| Myofibril formation and organization                      | ->    | 1     | >>    | 1     | 1     | 1     | 1     | 1     | 1     |
| Collagen biosynthesis                                     | -1    | >>    | >>    | >>    | >>    | >>    | >>    | >>    | >>    |
| Apoptosis                                                 | -1    | >>    | >>    | >>    | >>    | >>    | >>    | >>    | >>    |
| Metabolism of glutamate and histidine products            | -2    | >>    | 2     | 2     | 2     | 2     | 2     | 2     | 2     |
| Elastogenesis                                             | -3    | >>    | 3     | 3     | 3     | 3     | 3     | 3     | 3     |
| Cellular response to radiation                            | ->    | 3     | 3     | 3     | 3     | 3     | 3     | 3     | 3     |
| Neuronal signaling pathways                               | ->    | 4     | 4     | 4     | 4     | 4     | 4     | 4     | 4     |
| ECM breakdown                                             | -4    | >>    | 4     | 4     | 4     | 4     | 4     | 4     | 4     |
| Cellular response to oxidative stress                     | ->    | 5     | 5     | 5     | 5     | 5     | 5     | 5     | 5     |

|                                                           | MSNO1 | MSNO2 | MSNO3 | MSNO4 | MSNO5 | MSNO6 | MSNO7 | MSNO8 | MSNO9 |
|-----------------------------------------------------------|-------|-------|-------|-------|-------|-------|-------|-------|-------|
| Cardiomyocyte action potential generation and propagation | -1    | 2     | 10    | 10    | 10    | 10    | 10    | 10    | 10    |
| Amyloid generation and aggregation                        | -13   | 4     | 5     | 5     | 5     | 5     | 5     | 5     | 5     |
| Matricellular protein signaling                           | -2    | 2     | 2     | 2     | 2     | 2     | 2     | 2     | 2     |
| Sig. pathways that control cell prol. and diff.           | -3    | 5     | 1     | 3     | 3     | 3     | 3     | 3     | 3     |
| Apoptosis                                                 | -1    | >>    | 7     | 7     | 7     | 7     | 7     | 7     | 7     |
| Cellular response to radiation                            | -2    | >>    | 9     | 9     | 9     | 9     | 9     | 9     | 9     |
| Signaling pathways involved in hematopoiesis              | -10   | 3     | 3     | 3     | 3     | 3     | 3     | 3     | 3     |
| Myofibril formation and organization                      | ->    | 1     | 1     | 1     | 1     | 1     | 1     | 1     | 1     |
| Collagen biosynthesis                                     | -1    | >>    | 3     | 3     | 3     | 3     | 3     | 3     | 3     |
| Cell-matrix adhesion                                      | -1    | >>    | 2     | 2     | 2     | 2     | 2     | 2     | 2     |
| Elastogenesis                                             | -3    | >>    | 3     | 3     | 3     | 3     | 3     | 3     | 3     |
| Control of postsynaptic potential                         | ->    | 3     | 3     | 3     | 3     | 3     | 3     | 3     | 3     |
| Neuronal signaling pathways                               | ->    | 4     | 4     | 4     | 4     | 4     | 4     | 4     | 4     |
| ECM breakdown                                             | -4    | >>    | 4     | 4     | 4     | 4     | 4     | 4     | 4     |
| Cellular response to oxidative stress                     | ->    | 4     | 4     | 4     | 4     | 4     | 4     | 4     | 4     |
| Thyroid hormone related signaling                         | ->    | 5     | 5     | 5     | 5     | 5     | 5     | 5     | 5     |
| Metabolism of glutamate and histidine products            | -5    | >>    | 5     | 5     | 5     | 5     | 5     | 5     | 5     |

|                                                                  | MSNO1 | MSNO2 | MSNO3 | MSNO4 | MSNO5 | MSNO6 | MSNO7 | MSNO8 | MSNO9 |
|------------------------------------------------------------------|-------|-------|-------|-------|-------|-------|-------|-------|-------|
| Matricellular protein signaling                                  | -3    | 1     | 1     | 2     | 1     | 1     | 1     | 1     | 1     |
| Collagen biosynthesis                                            | -1    | 3     | 2     | 2     | 1     | 1     | 1     | 1     | 1     |
| Elastogenesis                                                    | -2    | 2     | 3     | 4     | 3     | 3     | 3     | 3     | 3     |
| Fibronectin matrix dynamics                                      | -4    | 4     | 4     | 4     | 4     | 4     | 4     | 4     | 4     |
| Signaling pathways involved in hematopoiesis                     | -5    | 6     | 3     | 6     | 6     | 6     | 6     | 6     | 6     |
| ECM breakdown                                                    | -5    | 7     | 5     | 5     | 5     | 5     | 5     | 5     | 5     |
| Sig. pathways that control cell prol. and diff.                  | -10   | >>    | 5     | 5     | 5     | 5     | 5     | 5     | 5     |
| Metabolism and transport of cholesterol, steroids and bile acids | ->    | 510   | 510   | 510   | 510   | 510   | 510   | 510   | 510   |

complete

no1stSD

decomposed

**Upregulated**

|                                                           | MSNO1 | MSNO2 | MSNO3 | MSNO4 | MSNO5 | MSNO6 | MSNO7 | MSNO8 | MSNO9 |
|-----------------------------------------------------------|-------|-------|-------|-------|-------|-------|-------|-------|-------|
| Matricellular protein signaling                           | -2    | 2     | 2     | 3     | 1     | 1     | 1     | 1     | 1     |
| Collagen biosynthesis                                     | -4    | 2     | 1     | 3     | 1     | 1     | 1     | 1     | 1     |
| Elastogenesis                                             | -4    | 4     | 3     | 3     | 3     | 3     | 3     | 3     | 3     |
| Cardiomyocyte action potential generation and propagation | -7    | 7     | 1     | 1     | 1     | 1     | 1     | 1     | 1     |
| Metabolism of fat-soluble vitamins                        | -6    | 4     | 1     | 12    | 8     | 8     | 8     | 8     | 8     |
| ECM breakdown                                             | -5    | 16    | 4     | 4     | 4     | 4     | 4     | 4     | 4     |
| Metabolism of tryptophan products                         | ->    | 5     | 2     | 2     | 2     | 2     | 2     | 2     | 2     |
| TGF-beta superfamily signaling                            | ->    | 8     | 9     | 9     | 9     | 9     | 9     | 9     | 9     |
| Myofibril formation and organization                      | ->    | 1     | >>    | 1     | 1     | 1     | 1     | 1     | 1     |
| Cellular response to hypoxia                              | ->    | 1     | >>    | 1     | 1     | 1     | 1     | 1     | 1     |
| Epidermal growth factor family signaling                  | ->    | >>    | 2     | 2     | 2     | 2     | 2     | 2     | 2     |
| Lipid droplet dynamics                                    | ->    | >>    | 3     | 3     | 3     | 3     | 3     | 3     | 3     |
| Carbohydrate metabolism and transport                     | ->    | 3     | 4     | 4     | 4     | 4     | 4     | 4     | 4     |
| Phase II biotransformation                                | ->    | 4     | 4     | 4     | 4     | 4     | 4     | 4     | 4     |
| One carbon metabolism                                     | ->    | 4     | 4     | 4     | 4     | 4     | 4     | 4     | 4     |
| Cell-cell adhesion                                        | ->    | 4     | 4     | 4     | 4     | 4     | 4     | 4     | 4     |
| Blood protein dynamics                                    | ->    | 5     | 5     | 5     | 5     | 5     | 5     | 5     | 5     |

|                                                           | MSNO1 | MSNO2 | MSNO3 | MSNO4 | MSNO5 | MSNO6 | MSNO7 | MSNO8 | MSNO9 |
|-----------------------------------------------------------|-------|-------|-------|-------|-------|-------|-------|-------|-------|
| Matricellular protein signaling                           | -2    | 6     | 1     | 3     | 1     | 1     | 1     | 1     | 1     |
| Collagen biosynthesis                                     | -4    | 2     | 3     | 11    | 1     | 1     | 1     | 1     | 1     |
| ECM breakdown                                             | -5    | 12    | 6     | 4     | 4     | 4     | 4     | 4     | 4     |
| Elastogenesis                                             | -6    | 6     | 2     | 8     | 8     | 8     | 8     | 8     | 8     |
| Cardiomyocyte action potential generation and propagation | -3    | 5     | 8     | 1     | 1     | 1     | 1     | 1     | 1     |
| Metabolism of fat-soluble vitamins                        | -6    | 4     | 10    | 2     | 2     | 2     | 2     | 2     | 2     |
| Sig. pathways that control cell prol. and diff.           | ->    | 3     | 11    | 3     | 8     | 8     | 8     | 8     | 8     |
| Metabolism of tryptophan products                         | ->    | 1     | 5     | 2     | 2     | 2     | 2     | 2     | 2     |
| Signaling pathways regulating cardiovascular homeostasis  | ->    | 1     | >>    | 7     | 4     | 4     | 4     | 4     | 4     |
| Gastrointestinal hormone signaling                        | ->    | 2     | 9     | 9     | 9     | 9     | 9     | 9     | 9     |
| Apoptosis                                                 | -2    | 9     | >>    | >>    | >>    | >>    | >>    | >>    | >>    |
| TGF-beta superfamily signaling                            | ->    | 9     | 5     | 1     | 1     | 1     | 1     | 1     | 1     |
| Myofibril formation and organization                      | ->    | 9     | 5     | 5     | 5     | 5     | 5     | 5     | 5     |
| Cellular response to hypoxia                              | ->    | 1     | >>    | 2     | 2     | 2     | 2     | 2     | 2     |
| One carbon metabolism                                     | ->    | 3     | 3     | 3     | 3     | 3     | 3     | 3     | 3     |
| Cell-cell adhesion                                        | ->    | 3     | 3     | 3     | 3     | 3     | 3     | 3     | 3     |
| Carbohydrate metabolism and transport                     | ->    | 3     | 3     | 3     | 3     | 3     | 3     | 3     | 3     |
| Phase II biotransformation                                | ->    | 4     | 4     | 4     | 4     | 4     | 4     | 4     | 4     |
| Neuronal signaling pathways                               | ->    | 4     | 5     | 5     | 5     | 5     | 5     | 5     | 5     |

|                                                           | MSNO1 | MSNO2 | MSNO3 | MSNO4 | MSNO5 | MSNO6 | MSNO7 | MSNO8 | MSNO9 |
|-----------------------------------------------------------|-------|-------|-------|-------|-------|-------|-------|-------|-------|
| Collagen biosynthesis                                     | -2    | 1     | 2     | 1     | 1     | 1     | 1     | 1     | 1     |
| Myofibril formation and organization                      | -6    | 4     | 5     | 2     | 2     | 2     | 2     | 2     | 2     |
| Cellular response to hypoxia                              | -1    | 7     | 3     | 3     | 8     | 8     | 8     | 8     | 8     |
| Amyloid generation and aggregation                        | -13   | 3     | 5     | 4     | 3     | 3     | 3     | 3     | 3     |
| ECM breakdown                                             | -9    | 2     | 11    | 6     | 4     | 4     | 4     | 4     | 4     |
| Cardiomyocyte action potential generation and propagation | -10   | 6     | 10    | 5     | 5     | 5     | 5     | 5     | 5     |
| Sig. pathways that control cell prol. and diff.           | ->    | 5     | 14    | 7     | 7     | 7     | 7     | 7     | 7     |
| Elastogenesis                                             | -12   | 15    | 4     | 7     | 7     | 7     | 7     | 7     | 7     |
| Matricellular protein signaling                           | -3    | 1     | 2     | >>    | >>    | >>    | >>    | >>    | >>    |
| Signaling pathways involved in hematopoiesis              | -14   | 4     | 7     | >>    | >>    | >>    | >>    | >>    | >>    |
| Carbohydrate metabolism and transport                     | -8    | 19    | 3     | >>    | >>    | >>    | >>    | >>    | >>    |
| Interferon signaling                                      | -4    | 6     | >>    | >>    | >>    | >>    | >>    | >>    | >>    |

**Downregulated**

|                                                                  | MSNO1 | MSNO2 | MSNO3 | MSNO4 | MSNO5 | MSNO6 | MSNO7 | MSNO8 | MSNO9 |
|------------------------------------------------------------------|-------|-------|-------|-------|-------|-------|-------|-------|-------|
| Cellular response to oxidative stress                            | -10   | 9     | 4     | 7     | 7     | 7     | 7     | 7     | 7     |
| Sig. pathways that control cell prol. and diff.                  | -3    | 3     | 2     | 2     | 2     | 2     | 2     | 2     | 2     |
| Basement membrane dynamics                                       | -1    | 3     | 4     | 5     | 5     | 5     | 5     | 5     | 5     |
| ECM breakdown                                                    | -2    | 2     | 2     | 2     | 2     | 2     | 2     | 2     | 2     |
| Amyloid generation and aggregation                               | -4    | 1     | 1     | 3     | 3     | 3     | 3     | 3     | 3     |
| Metabolism and transport of cholesterol, steroids and bile acids | -1    | 1     | 1     | 6     | 10    | 10    | 10    | 10    | 10    |
| Cellular response to hypoxia                                     | -1    | 1     | 1     | 1     | 3     | 3     | 3     | 3     | 3     |
| Matricellular protein signaling                                  | -6    | 6     | 6     | 6     | 6     | 6     | 6     | 6     | 6     |
| Carbohydrate metabolism and transport                            | ->    | 5     | 5     | 5     | 5     | 5     | 5     | 5     | 5     |
| Neuronal signaling pathways                                      | ->    | 9     | 9     | 9     | 9     | 9     | 9     | 9     | 9     |
| Cell-cell adhesion                                               | ->    | 12    | 2     | 14    | 14    | 14    | 14    | 14    | 14    |
| Myofibril formation and organization                             | ->    | 2     | 2     | 2     | 2     | 2     | 2     | 2     | 2     |
| Metabolism of tryptophan products                                | ->    | 3     | 3     | 3     | 3     | 3     | 3     | 3     | 3     |
| PT protein modification and QC during secretory pathway          | ->    | 3     | 3     |       |       |       |       |       |       |

**MBCOL3  
afatinib**  
(is c.toxic: no)

**MBCOL3  
axitinib**  
(is c.toxic: no)

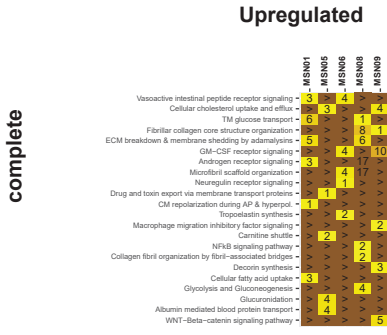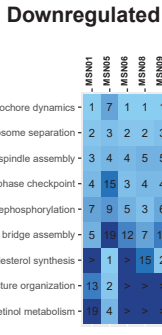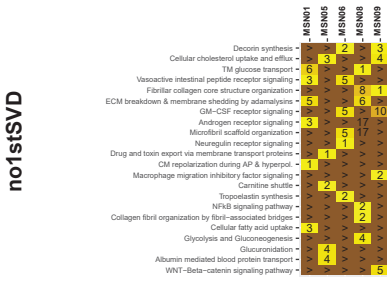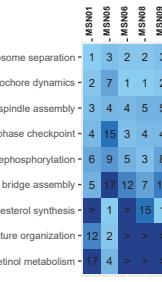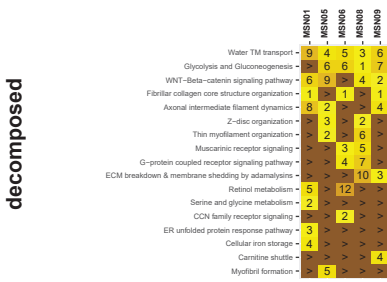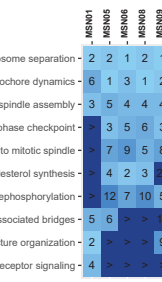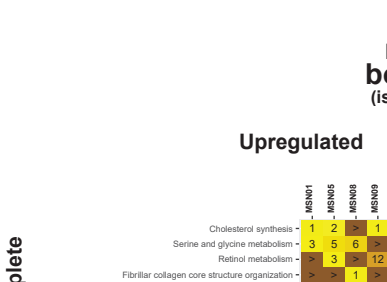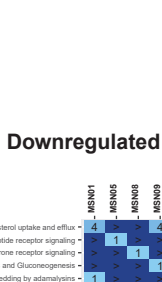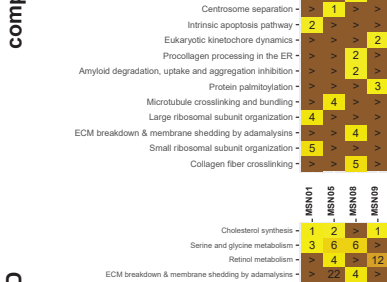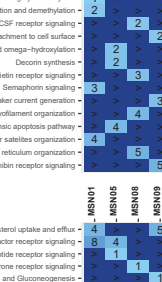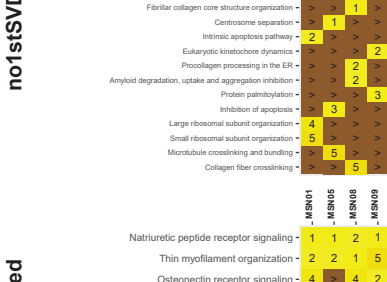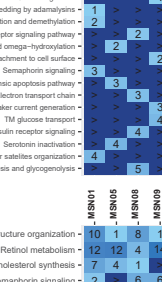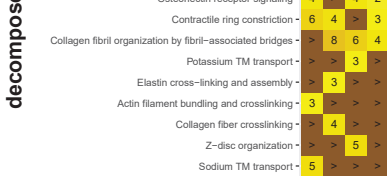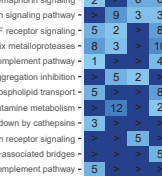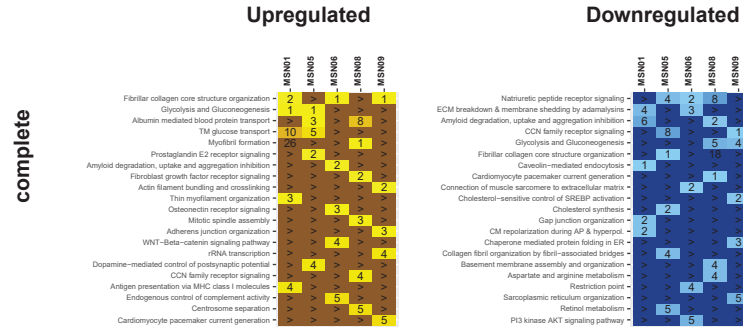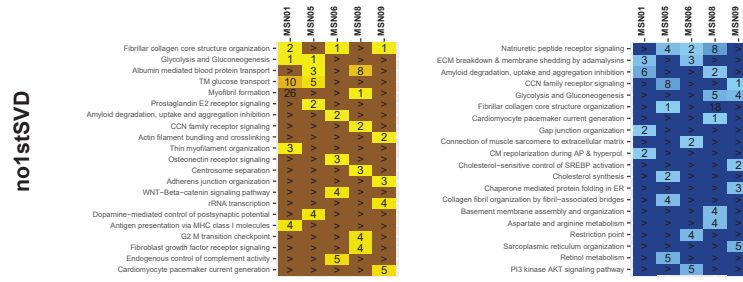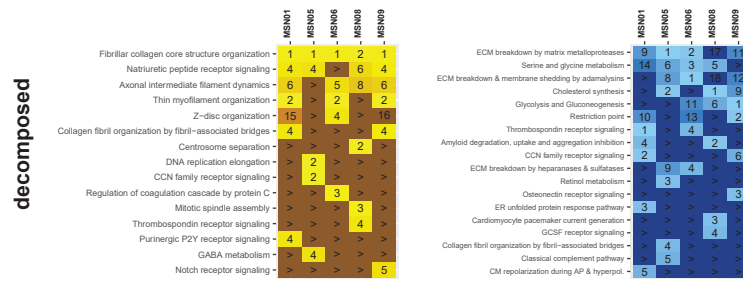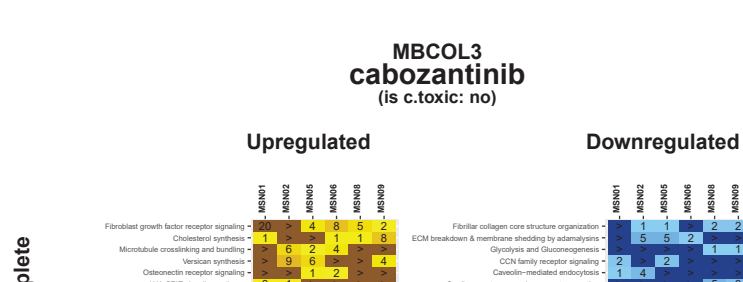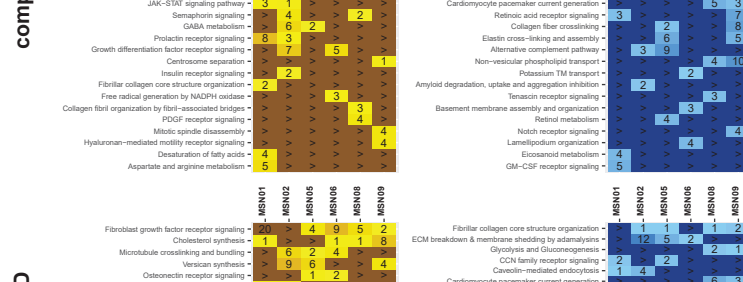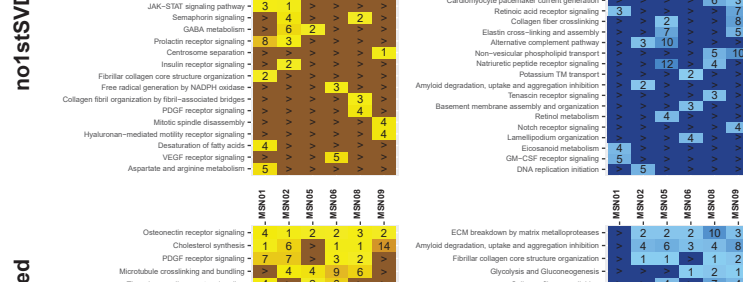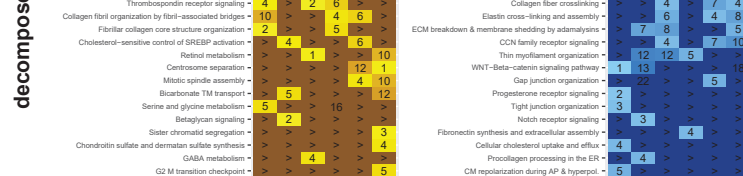

**MBCOL3  
bosutinib**  
(is c.toxic: no)

**MBCOL3  
cabozantinib**  
(is c.toxic: no)

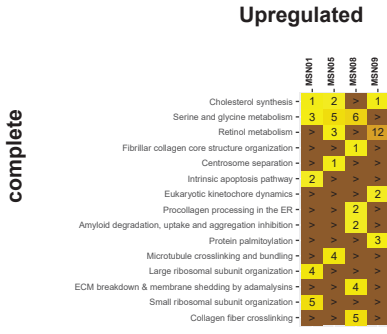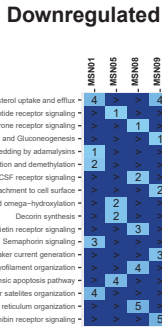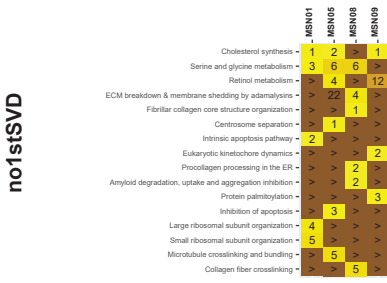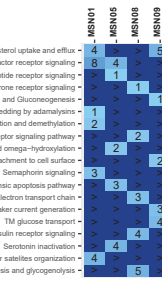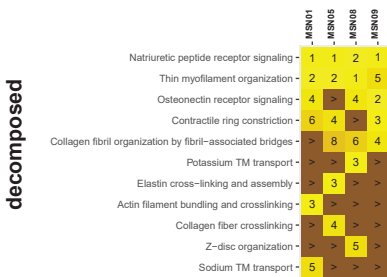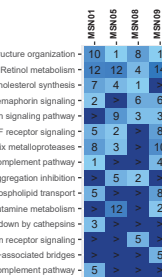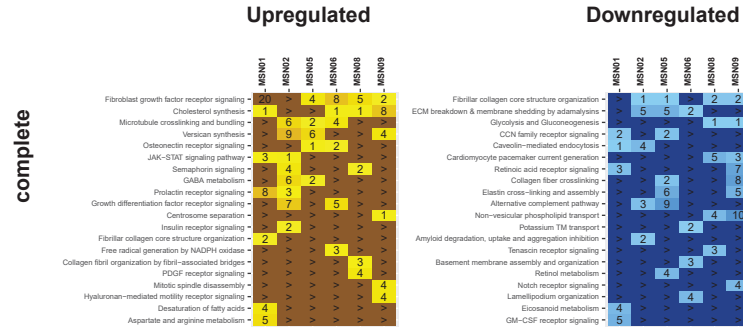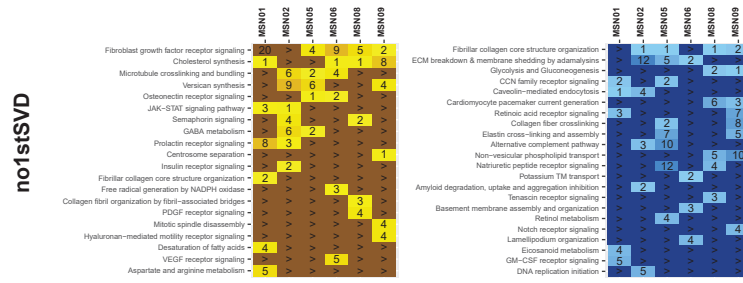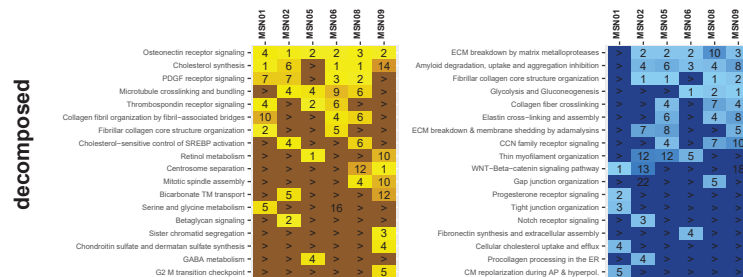

MBCOL3  
ceritinib  
(is c.toxic: no)

MBCOL3  
crizotinib  
(is c.toxic: no)

Upregulated

Downregulated

Upregulated

Downregulated

complete

Heatmap showing upregulated pathways for ceritinib in the 'complete' group. Pathways include Amyloid degradation, Actin filament bundling, Fibroblast collagen core structure organization, and others. Values range from 1 to 10.

Heatmap showing downregulated pathways for ceritinib in the 'complete' group. Pathways include Eukaryotic kinetochore dynamics, Centrosome separation, Mitotic spindle assembly, and others. Values range from 1 to 12.

complete

Heatmap showing upregulated pathways for crizotinib in the 'complete' group. Pathways include Fibroblast collagen core structure organization, CCN family receptor signaling, and others. Values range from 1 to 5.

Heatmap showing downregulated pathways for crizotinib in the 'complete' group. Pathways include Fibroblast collagen core structure organization, Cholesterol synthesis, and others. Values range from 1 to 10.

no1stSVD

Heatmap showing upregulated pathways for ceritinib in the 'no1stSVD' group. Pathways include Fibroblast collagen core structure organization, Amyloid degradation, and others. Values range from 1 to 20.

Heatmap showing downregulated pathways for ceritinib in the 'no1stSVD' group. Pathways include Centrosome separation, Mitotic spindle assembly, and others. Values range from 1 to 6.

no1stSVD

Heatmap showing upregulated pathways for crizotinib in the 'no1stSVD' group. Pathways include Fibroblast collagen core structure organization, CCN family receptor signaling, and others. Values range from 1 to 5.

Heatmap showing downregulated pathways for crizotinib in the 'no1stSVD' group. Pathways include Fibroblast collagen core structure organization, Cholesterol synthesis, and others. Values range from 1 to 10.

decomposed

Heatmap showing upregulated pathways for ceritinib in the 'decomposed' group. Pathways include Amyloid degradation, Cellular cholesterol uptake, and others. Values range from 1 to 11.

Heatmap showing downregulated pathways for ceritinib in the 'decomposed' group. Pathways include Centrosome separation, Eukaryotic kinetochore dynamics, and others. Values range from 1 to 12.

decomposed

Heatmap showing upregulated pathways for crizotinib in the 'decomposed' group. Pathways include ECM breakdown by heparanases, Natriuretic peptide receptor signaling, and others. Values range from 1 to 13.

Heatmap showing downregulated pathways for crizotinib in the 'decomposed' group. Pathways include Fibroblast collagen core structure organization, Elastin cross-linking, and others. Values range from 1 to 11.

MBCOL3  
dabrafenib  
(is c.toxic: yes)

MBCOL3  
dasatinib  
(is c.toxic: no)

Upregulated

Downregulated

Upregulated

Downregulated

complete

Heatmap showing upregulated pathways for dabrafenib in the 'complete' group. Pathways include Serine and glycine metabolism, ER unfolded protein response pathway, and others. Values range from 1 to 12.

Heatmap showing downregulated pathways for dabrafenib in the 'complete' group. Pathways include Retinol metabolism, Myofibril formation, and others. Values range from 1 to 10.

complete

Heatmap showing upregulated pathways for dasatinib in the 'complete' group. Pathways include Calcitonin receptor signaling, ECM breakdown, and others. Values range from 1 to 15.

Heatmap showing downregulated pathways for dasatinib in the 'complete' group. Pathways include Fibroblast collagen core structure organization, Bicyclic synthesis, and others. Values range from 1 to 10.

no1stSVD

Heatmap showing upregulated pathways for dabrafenib in the 'no1stSVD' group. Pathways include Serine and glycine metabolism, ER unfolded protein response pathway, and others. Values range from 1 to 6.

Heatmap showing downregulated pathways for dabrafenib in the 'no1stSVD' group. Pathways include Retinol metabolism, Z-disc organization, and others. Values range from 1 to 6.

no1stSVD

Heatmap showing upregulated pathways for dasatinib in the 'no1stSVD' group. Pathways include Calcitonin receptor signaling, ECM breakdown, and others. Values range from 1 to 15.

Heatmap showing downregulated pathways for dasatinib in the 'no1stSVD' group. Pathways include Fibroblast collagen core structure organization, Bicyclic synthesis, and others. Values range from 1 to 10.

decomposed

Heatmap showing upregulated pathways for dabrafenib in the 'decomposed' group. Pathways include Serine and glycine metabolism, ER unfolded protein response pathway, and others. Values range from 1 to 5.

Heatmap showing downregulated pathways for dabrafenib in the 'decomposed' group. Pathways include Retinol metabolism, Z-disc organization, and others. Values range from 1 to 5.

decomposed

Heatmap showing upregulated pathways for dasatinib in the 'decomposed' group. Pathways include Calcitonin receptor signaling, ECM breakdown, and others. Values range from 1 to 15.

Heatmap showing downregulated pathways for dasatinib in the 'decomposed' group. Pathways include Fibroblast collagen core structure organization, Restriction point, and others. Values range from 1 to 12.

**MBCOL3  
erlotinib**  
(is c.toxic: no)

**MBCOL3  
gefitinib**  
(is c.toxic: no)

**Upregulated**

**Downregulated**

**complete**

|                                               | MSNB1 | MSNB5 | MSNB6 | MSNB9 |
|-----------------------------------------------|-------|-------|-------|-------|
| Serine and glycine metabolism                 | 2     | 1     | 2     | 1     |
| ER unfolded protein response pathway          | 1     | 4     | 1     | 2     |
| Aspartate and arginine metabolism             | 4     | 6     | >     | 5     |
| Cellular iron storage                         | 3     | >     | >     | 3     |
| Glutamate and glutamine metabolism            | >     | >     | 5     | 4     |
| Intrinsic apoptosis pathway                   | >     | >     | 4     | 8     |
| Vimentin-like intermediate filament dynamics  | 5     | >     | >     | 16    |
| TM glucose transport                          | >     | 2     | >     | >     |
| Thin myofilament organization                 | >     | 3     | >     | >     |
| Heme degradation to bilirubin                 | >     | >     | 3     | >     |
| Phase I biotransformation via cytochrome P450 | >     | 4     | >     | >     |

|                                                      | MSNB1 | MSNB5 | MSNB6 | MSNB9 |
|------------------------------------------------------|-------|-------|-------|-------|
| Eukaryotic kinetochore dynamics                      | 1     | 4     | 3     | 2     |
| DNA replication initiation                           | 11    | 2     | 1     | 1     |
| Centrosome separation                                | 4     | 3     | 5     | 3     |
| Fanconi anemia interstrand cross-link repair pathway | 12    | 11    | 4     | 10    |
| Mitotic spindle assembly                             | 3     | 8     | 27    | 7     |
| DNA replication elongation                           | >     | 5     | 2     | 5     |
| Metaphase to anaphase checkpoint                     | 2     | 6     | >     | 6     |
| Intracellular bridge assembly                        | 5     | 18    | >     | 22    |
| Fibrillar collagen core structure organization       | >     | 1     | 20    | >     |
| Glycolysis and Gluconeogenesis                       | >     | >     | >     | 4     |

**no1stSVD**

|                                      | MSNB1 | MSNB5 | MSNB6 | MSNB9 |
|--------------------------------------|-------|-------|-------|-------|
| Serine and glycine metabolism        | 2     | 1     | 2     | 1     |
| ER unfolded protein response pathway | 1     | 6     | 1     | 2     |
| Aspartate and arginine metabolism    | 6     | 2     | >     | 5     |
| Cellular iron storage                | 3     | >     | >     | 3     |
| Thin myofilament organization        | 4     | 5     | >     | >     |
| Intrinsic apoptosis pathway          | >     | >     | 3     | 8     |
| Glutamate and glutamine metabolism   | >     | >     | 7     | 4     |
| TM glucose transport                 | 8     | 3     | >     | >     |
| Z-disc organization                  | >     | >     | 4     | >     |
| Urea cycle                           | >     | 4     | >     | >     |
| Androgen synthesis                   | >     | >     | 5     | >     |

|                                                      | MSNB1 | MSNB5 | MSNB6 | MSNB9 |
|------------------------------------------------------|-------|-------|-------|-------|
| Eukaryotic kinetochore dynamics                      | 1     | 4     | 4     | 2     |
| Centrosome separation                                | 4     | 3     | 5     | 3     |
| DNA replication initiation                           | 2     | 2     | 1     | 1     |
| Fanconi anemia interstrand cross-link repair pathway | 12    | 11    | 3     | 9     |
| Mitotic spindle assembly                             | 3     | 8     | 26    | 7     |
| DNA replication elongation                           | >     | 5     | 2     | 5     |
| Metaphase to anaphase checkpoint                     | 2     | 6     | >     | 6     |
| Intracellular bridge assembly                        | 5     | 18    | >     | 22    |
| Fibrillar collagen core structure organization       | >     | 1     | 20    | >     |
| Glycolysis and Gluconeogenesis                       | >     | >     | >     | 4     |

**decomposed**

|                                                  | MSNB1 | MSNB5 | MSNB6 | MSNB9 |
|--------------------------------------------------|-------|-------|-------|-------|
| ER unfolded protein response pathway             | 1     | 1     | 1     | 2     |
| Serine and glycine metabolism                    | 2     | 2     | 2     | 1     |
| Vasoactive intestinal peptide receptor signaling | 3     | 6     | 7     | 10    |
| Aspartate and arginine metabolism                | 7     | 3     | >     | 3     |
| Protein polyubiquitination                       | >     | 4     | >     | 7     |
| Glutamate and glutamine metabolism               | 9     | >     | >     | 5     |
| Fibrillar collagen core structure organization   | >     | >     | 3     | 2     |
| Neuregulin receptor signaling                    | >     | >     | >     | 4     |
| ECM breakdown by matrix metalloproteinases       | 4     | >     | >     | >     |
| Decorin synthesis                                | >     | >     | >     | 4     |
| Intrinsic apoptosis pathway                      | >     | >     | >     | 5     |
| Cholesterol synthesis                            | 5     | >     | >     | >     |

|                                  | MSNB1 | MSNB5 | MSNB6 | MSNB9 |
|----------------------------------|-------|-------|-------|-------|
| DNA replication initiation       | 2     | 1     | 1     | 1     |
| Eukaryotic kinetochore dynamics  | 1     | 4     | 3     | 2     |
| Centrosome separation            | 3     | 2     | 2     | 3     |
| DNA replication elongation       | 4     | 3     | 4     | 4     |
| Metaphase to anaphase checkpoint | 5     | 7     | 5     | 5     |
| Mitotic spindle assembly         | 6     | 5     | 6     | 8     |

**complete**

|                                                   | MSNB1 | MSNB5 | MSNB6 | MSNB9 |
|---------------------------------------------------|-------|-------|-------|-------|
| Cholesterol synthesis                             | 2     | 1     | 1     | 1     |
| Centrosome separation                             | 1     | 3     | 3     | 4     |
| Metaphase to anaphase checkpoint                  | 3     | 7     | 4     | >     |
| Sister chromatid segregation                      | 6     | 4     | 10    | >     |
| Cholesterol-sensitive control of SREBP activation | 4     | 4     | 17    | 2     |
| Eukaryotic kinetochore dynamics                   | 4     | 2     | >     | 2     |
| Mitotic spindle assembly                          | 5     | 5     | >     | >     |
| Citric acid cycle                                 | 8     | 2     | >     | >     |
| Tropoelastin synthesis                            | >     | >     | 24    | 4     |
| Decorin synthesis                                 | >     | >     | 24    | 4     |
| Phosphoglyceride biosynthesis                     | >     | >     | >     | 3     |

**Downregulated**

|                                                           | MSNB1 | MSNB5 | MSNB6 | MSNB9 |
|-----------------------------------------------------------|-------|-------|-------|-------|
| Collagen fibril organization by fibril-associated bridges | 2     | 1     | 1     | 8     |
| Blycyl synthesis                                          | 4     | 17    | >     | 14    |
| Fibrillar collagen core structure organization            | 2     | 1     | >     | >     |
| WNT-Beta-catenin signaling pathway                        | >     | 4     | >     | 6     |
| Retinol metabolism                                        | 8     | 9     | >     | 2     |
| MicrorRNA scaffold organization                           | 8     | 9     | >     | 3     |
| Tropoelastin synthesis                                    | 4     | 17    | >     | >     |
| Progesterone receptor signaling                           | >     | 17    | 4     | >     |
| Glycolysis and Gluconeogenesis                            | >     | >     | >     | 1     |
| Fibronectin synthesis and extracellular assembly          | 1     | >     | >     | 1     |
| Potassium TM transport                                    | >     | >     | 2     | >     |
| Neuregulin receptor signaling                             | >     | >     | 2     | >     |
| Hepatocyte growth factor receptor signaling               | >     | 3     | >     | 4     |
| Fibrin synthesis                                          | >     | >     | >     | 4     |
| Tenascin receptor signaling                               | >     | >     | >     | 5     |
| Semaphorin signaling                                      | >     | >     | >     | 5     |
| PI3 kinase AKT signaling pathway                          | 5     | >     | >     | >     |
| Amyloid degradation, uptake and aggregation inhibition    | >     | 5     | >     | >     |

**no1stSVD**

|                                                   | MSNB1 | MSNB5 | MSNB6 | MSNB9 |
|---------------------------------------------------|-------|-------|-------|-------|
| Cholesterol synthesis                             | 2     | 1     | 1     | 1     |
| Centrosome separation                             | 1     | 3     | 3     | 4     |
| Metaphase to anaphase checkpoint                  | 3     | 7     | 4     | >     |
| Sister chromatid segregation                      | 6     | 4     | 10    | >     |
| Cholesterol-sensitive control of SREBP activation | 4     | 4     | 17    | 2     |
| Eukaryotic kinetochore dynamics                   | 4     | 2     | >     | 2     |
| Mitotic spindle assembly                          | 5     | 5     | >     | >     |
| Citric acid cycle                                 | 8     | 2     | >     | >     |
| Tropoelastin synthesis                            | >     | >     | 24    | 4     |
| Decorin synthesis                                 | >     | >     | 24    | 4     |
| Phosphoglyceride biosynthesis                     | >     | >     | >     | 3     |

|                                                           | MSNB1 | MSNB5 | MSNB6 | MSNB9 |
|-----------------------------------------------------------|-------|-------|-------|-------|
| Collagen fibril organization by fibril-associated bridges | 2     | 1     | 1     | 8     |
| Blycyl synthesis                                          | 4     | 17    | >     | 14    |
| Fibrillar collagen core structure organization            | 2     | 1     | >     | >     |
| WNT-Beta-catenin signaling pathway                        | >     | 4     | >     | 6     |
| Retinol metabolism                                        | 8     | 9     | >     | 2     |
| MicrorRNA scaffold organization                           | 8     | 9     | >     | 3     |
| Tropoelastin synthesis                                    | 4     | 17    | >     | >     |
| Progesterone receptor signaling                           | >     | 17    | 4     | >     |
| Glycolysis and Gluconeogenesis                            | >     | >     | >     | 1     |
| Fibronectin synthesis and extracellular assembly          | 1     | >     | >     | 1     |
| Potassium TM transport                                    | >     | >     | 2     | >     |
| Neuregulin receptor signaling                             | >     | >     | 2     | >     |
| Hepatocyte growth factor receptor signaling               | >     | 3     | >     | 4     |
| Fibrin synthesis                                          | >     | >     | >     | 4     |
| Tenascin receptor signaling                               | >     | >     | >     | 5     |
| Semaphorin signaling                                      | >     | >     | >     | 5     |
| PI3 kinase AKT signaling pathway                          | 5     | >     | >     | >     |
| Amyloid degradation, uptake and aggregation inhibition    | >     | 5     | >     | >     |

**decomposed**

|                                                   | MSNB1 | MSNB5 | MSNB6 | MSNB9 |
|---------------------------------------------------|-------|-------|-------|-------|
| Cholesterol synthesis                             | 1     | 1     | 1     | 1     |
| Cholesterol-sensitive control of SREBP activation | 9     | 8     | 20    | 2     |
| Centrosome separation                             | 2     | 2     | 2     | 2     |
| Metaphase to anaphase checkpoint                  | 3     | 4     | 3     | >     |
| Centrosome maturation                             | 4     | 5     | 8     | >     |
| Mitotic spindle assembly                          | 5     | 3     | 9     | >     |
| Eukaryotic kinetochore dynamics                   | 10    | 6     | 4     | >     |
| Transamination pathways                           | >     | >     | 22    | 4     |
| GABA metabolism                                   | >     | >     | >     | 2     |
| ECM breakdown & membrane shedding by adamalysins  | >     | >     | >     | 5     |

|                                                           | MSNB1 | MSNB5 | MSNB6 | MSNB9 |
|-----------------------------------------------------------|-------|-------|-------|-------|
| Collagen fibril organization by fibril-associated bridges | 2     | 4     | 4     | 4     |
| WNT-Beta-catenin signaling pathway                        | >     | 6     | 3     | 2     |
| Serine and glycine metabolism                             | 1     | >     | 1     | 3     |
| Retinol metabolism                                        | 2     | >     | >     | 3     |
| ECM breakdown & membrane shedding by adamalysins          | >     | 4     | 8     | >     |
| Chaperone mediated protein folding in ER                  | 5     | >     | 12    | >     |
| Hepatocyte growth factor receptor signaling               | >     | 5     | 16    | >     |
| Glycolysis and Gluconeogenesis                            | >     | >     | >     | 1     |
| Fibrillar collagen core structure organization            | >     | 1     | >     | >     |
| Neuregulin receptor signaling                             | >     | >     | 2     | >     |
| Thrombospondin receptor signaling                         | 3     | >     | >     | >     |
| CCN family receptor signaling                             | >     | 3     | >     | >     |
| Urea cycle                                                | 4     | >     | >     | >     |
| Tenascin receptor signaling                               | >     | >     | >     | 5     |
| ECM breakdown by cathepsins                               | >     | >     | >     | 5     |

**complete**

|                                                  | MSNB1 | MSNB5 | MSNB6 | MSNB9 |
|--------------------------------------------------|-------|-------|-------|-------|
| Semaphorin signaling                             | 6     | 2     | 3     | 2     |
| Alternative complement pathway                   | 1     | 4     | 4     | 1     |
| Classical complement pathway                     | 3     | 5     | 4     | 3     |
| Serine and glycine metabolism                    | 7     | 2     | 2     | 6     |
| ECM breakdown & membrane shedding by adamalysins | 5     | 6     | 5     | 5     |
| Water TM transport                               | 2     | 4     | >     | 4     |
| Fibrillar collagen core structure organization   | 3     | >     | 1     | >     |
| Osteonectin receptor signaling                   | 1     | >     | >     | >     |
| Albumin mediated blood protein transport         | 4     | >     | >     | >     |
| Inhibition of apoptosis                          | 5     | >     | >     | >     |

|                                                        | MSNB1 | MSNB5 | MSNB6 | MSNB9 |
|--------------------------------------------------------|-------|-------|-------|-------|
| Cholesterol synthesis                                  | 1     | 1     | 1     | 1     |
| Cholesterol-sensitive control of SREBP activation      | 2     | 4     | 3     | 5     |
| Lipogenesis                                            | 4     | 15    | 15    | 10    |
| Leptin receptor signaling                              | 6     | 3     | 5     | 5     |
| ECM breakdown & membrane shedding by adamalysins       | 13    | 6     | 10    | 3     |
| JAK-STAT signaling pathway                             | 16    | 11    | 2     | 10    |
| Interferon beta receptor signaling                     | 11    | 5     | 7     | >     |
| Amyloid degradation, uptake and aggregation inhibition | >     | 2     | >     | 4     |
| Desaturation of fatty acids                            | 3     | >     | 4     | >     |
| WNT-Beta-catenin signaling pathway                     | >     | >     | 17    | 4     |
| Hepatocyte growth factor receptor signaling            | >     | >     | >     | 2     |
| ER unfolded protein response pathway                   | >     | >     | >     | 2     |
| Heme degradation to bilirubin                          | >     | >     | >     | 4     |

**decomposed**

|                                                           | MSNB1 | MSNB5 | MSNB6 | MSNB9 |
|-----------------------------------------------------------|-------|-------|-------|-------|
| Natriuretic peptide receptor signaling                    | 7     | 16    | 13    | 4     |
| DNA replication initiation                                | >     | 5     | 3     | 1     |
| Eukaryotic kinetochore dynamics                           | 2     | 3     | 1     | 6     |
| Centrosome separation                                     | 3     | 1     | 4     | 15    |
| Fanconi anemia interstrand cross-link repair pathway      | 4     | 10    | 10    | 3     |
| DNA replication elongation                                | >     | 14    | 12    | 2     |
| Mitotic spindle assembly                                  | 5     | 6     | 2     | >     |
| Metaphase to anaphase checkpoint                          | 6     | 2     | 5     | >     |
| Glycolysis and Gluconeogenesis                            | >     | 4     | >     | 1     |
| Contactin ring constriction                               | 2     | 14    | >     | 11    |
| Collagen fibril organization by fibril-associated bridges | >     | 14    | 13    | 4     |
| Glycolysis and Gluconeogenesis                            | >     | 4     | >     | 1     |
| Intracellular bridge assembly                             | >     | 3     | >     | >     |

|                                                           | MSNB1 | MSNB5 | MSNB6 | MSNB9 |
|-----------------------------------------------------------|-------|-------|-------|-------|
| Natriuretic peptide receptor signaling                    | 7     | 16    | 13    | 4     |
| DNA replication initiation                                | >     | 5     | 3     | 1     |
| Eukaryotic kinetochore dynamics                           | 2     | 3     | 1     | 6     |
| Centrosome separation                                     | 3     | 1     | 4     | 15    |
| Fanconi anemia interstrand cross-link repair pathway      | 4     | 10    | 10    | 3     |
| DNA replication elongation                                | >     | 14    | 12    | 2     |
| Mitotic spindle assembly                                  | 5     | 6     | 2     | >     |
| Metaphase to anaphase checkpoint                          | 6     | 2     | 5     | >     |
| Glycolysis and Gluconeogenesis                            | >     | 4     | >     | 1     |
| Contactin ring constriction                               | 2     | 14    | >     | 11    |
| Collagen fibril organization by fibril-associated bridges | >     | 14    | 13    | 4     |
| Glycolysis and Gluconeogenesis                            | >     | 4     | >     | 1     |
| Intracellular bridge assembly                             | >     | 3     | >     | >     |

**decomposed**

|                                                           | MSNB1 | MSNB5 | MSNB6 | MSNB9 |
|-----------------------------------------------------------|-------|-------|-------|-------|
| Natriuretic peptide receptor signaling                    | 5     | 9     | 8     | 9     |
| Contactin ring constriction                               | 7     | 2     | 5     | 2     |
| Glutamate and glutamine metabolism                        | 4     | 6     | 9     | 9     |
| Eukaryotic kinetochore dynamics                           | >     | 2     | 2     | 3     |
| DNA replication initiation                                | >     | 4     | 4     | 9     |
| Metaphase to anaphase checkpoint                          | >     | 3     | 3     | 15    |
| Mitotic spindle assembly                                  | >     | 5     | 6     | 10    |
| Collagen fibril organization by fibril-associated bridges | >     | 16    | 5     | 9     |
| Centrosome separation                                     | >     | 1     | 1     | 1     |
| Intracellular bridge assembly                             | >     | 6     | >     | 4     |
| Elastin cross-linking and assembly                        | >     | 14    | >     | 4     |
| Collagen fiber crosslinking                               | >     | 16    | >     | 4     |
| ECM breakdown & membrane shedding by adamalysins          | >     | 4     | >     | 2     |
| Cellular cholesterol uptake and efflux                    | >     | 4     | >     | 2     |
| Serine and glycine metabolism                             | 1     | 2     | >     | >     |
| Classical complement pathway                              | 2     | >     | >     | >     |
| ECM breakdown by matrix metalloproteinases                | >     | 3     | >     | >     |

|                                                        | MSNB1 | MSNB5 | MSNB6 | MSNB9 |
|--------------------------------------------------------|-------|-------|-------|-------|
| Cholesterol synthesis                                  | 1     | 1     | 1     | 1     |
| Cholesterol-sensitive control of SREBP activation      | 2     | 4     | 3     | 5     |
| Lipogenesis                                            | 4     | 15    | 15    | 10    |
| Leptin receptor signaling                              | 6     | 3     | 5     | 5     |
| ECM breakdown & membrane shedding by adamalysins       | 13    | 6     | 10    | 3     |
| JAK-STAT signaling pathway                             | 16    | 11    | 2     | 10    |
| Interferon beta receptor signaling                     | 11    | 5     | 7     | >     |
| Amyloid degradation, uptake and aggregation inhibition | >     | 2     | >     | 4     |
| Desaturation of fatty acids                            | 3     | >     | 4     | >     |
| WNT-Beta-catenin signaling pathway                     | >     | >     | 17    | 4     |
| Hepatocyte growth factor receptor signaling            | >     | >     | >     | 2     |
| ER unfolded protein response pathway                   | >     | >     | >     | 2     |
| Heme degradation to bilirubin                          | >     | >     | >     | 4     |

**decomposed**

|                                                        | MSNB1 | MSNB5 | MSNB6 | MSNB9 |
|--------------------------------------------------------|-------|-------|-------|-------|
| Centrosome separation                                  | 1     | 2     | 1     | 3     |
| Metaphase to anaphase checkpoint                       | 4     | 5     | 3     | 5     |
| Mitotic spindle assembly                               | 2     | 3     | 6     | 6     |
| Eukaryotic kinetochore dynamics                        | 2     | 4     | 7     | 4     |
| Centrosome maturation                                  | 12    | 12    | 2     | 16    |
| G2 M transition checkpoint                             | 12    | 12    | 2     | 16    |
| Cholesterol synthesis                                  | 5     | 1     | 1     | 1     |
| G2 M transition checkpoint                             | 12    | 12    | 2     | 16    |
| Collagen fiber crosslinking                            | 3     | 6     | >     | 24    |
| Fibrillar collagen core structure organization         | >     | 1     | 25    | 24    |
| Tenascin receptor signaling                            | >     | 12    | >     | 5     |
| Glycolysis and Gluconeogenesis                         | >     | 25    | >     | 2     |
| ECM breakdown by matrix metalloproteinases             | 28    | 5     | >     | >     |
| Retinol metabolism                                     | 2     | >     | >     | >     |
| Amyloid degradation, uptake and aggregation inhibition | 4     | >     | >     | >     |

|                                    | MSNB1 | MSNB5 | MSNB6 | MSNB9 |
|------------------------------------|-------|-------|-------|-------|
| Cholesterol synthesis              | 1     | 1     | 1     | 1     |
| Decorin synthesis                  | 4     | 4     | 6     | 2     |
| Androgen receptor signaling        | 4     | 2     | 10    | >     |
| Procollagen cleavage into collagen |       |       |       |       |



**MBCOL3  
nilotinib  
(is c.toxic: no)**

**MBCOL3  
pazopanib  
(is c.toxic: yes)**

**Upregulated**

**Downregulated**

**Upregulated**

**Downregulated**

**complete**

|                                                  | MSN01 | MSN05 | MSN06 | MSN08 | MSN09 |
|--------------------------------------------------|-------|-------|-------|-------|-------|
| Centrosome separation                            | 1     | 8     | 2     | 1     | 2     |
| Serine and glycine metabolism                    | 4     | 1     | 5     | 4     | 8     |
| Eukaryotic kinetochore dynamics                  | >     | 16    | 1     | 2     | 1     |
| Metaphase to anaphase checkpoint                 | >     | 16    | 4     | 3     | 4     |
| Mitotic spindle assembly                         | >     | 17    | 3     | 5     | 3     |
| Sister chromatid segregation                     | >     | 3     | 9     | 16    | 12    |
| Centrosome maturation                            | >     | 3     | 11    | 10    | 12    |
| Cholesterol synthesis                            | 18    | 5     | >     | >     | >     |
| Glycolysis and Gluconeogenesis                   | 2     | >     | >     | >     | >     |
| Selectin-mediated Leukocyte rolling              | >     | >     | >     | >     | >     |
| GABA metabolism                                  | >     | >     | >     | >     | >     |
| Fibrillar collagen core structure organization   | 3     | >     | >     | >     | >     |
| Fibronectin synthesis and extracellular assembly | 5     | >     | >     | >     | >     |

|                                                           | MSN01 | MSN05 | MSN06 | MSN08 | MSN09 |
|-----------------------------------------------------------|-------|-------|-------|-------|-------|
| Z-disc organization                                       | >     | 9     | 1     | 2     | 3     |
| Thin myofibril organization                               | >     | 5     | 2     | 3     | >     |
| Thick myofibril organization                              | >     | 2     | 5     | 5     | >     |
| Epithelial intermediate filament dynamics                 | >     | 6     | >     | 4     | 4     |
| Fibrillar collagen core structure organization            | >     | 1     | >     | 13    | 12    |
| GM-CSF receptor signaling                                 | >     | 11    | 3     | 7     | >     |
| Collagen fibril organization by fibril-associated bridges | >     | 2     | >     | 10    | >     |
| Potassium TM transport                                    | >     | 4     | >     | 10    | >     |
| Gap junction organization                                 | >     | 2     | >     | 20    | >     |
| Glycolysis and Gluconeogenesis                            | >     | >     | >     | >     | 1     |
| CM repolarization during AP & hyperpol.                   | >     | 2     | >     | >     | >     |
| ECM breakdown & membrane shedding by adamalysins          | >     | 2     | >     | >     | >     |
| Microtubule crosslinking and bundling                     | >     | 3     | >     | >     | >     |
| Connection of muscle sarcomere to plasma membrane         | >     | 3     | >     | >     | >     |
| Tenascin receptor signaling                               | >     | 4     | >     | >     | >     |
| Hepatocyte growth factor receptor signaling               | >     | 4     | >     | >     | >     |
| Amyloid plaque organization                               | >     | 4     | >     | >     | >     |
| Thick myofibril organization                              | >     | 4     | >     | >     | 5     |
| Glycogen synthesis and glycogenolysis                     | >     | 5     | >     | >     | >     |
| Fibroblast growth factor receptor signaling               | >     | 5     | >     | >     | >     |

**complete**

|                                                   | MSN01 | MSN05 | MSN06 | MSN08 | MSN09 |
|---------------------------------------------------|-------|-------|-------|-------|-------|
| Serine and glycine metabolism                     | 3     | 1     | 3     | 4     | 1     |
| Lysosomal glycoprotein degradation                | 8     | 4     | 4     | 6     | 4     |
| Cholesterol-sensitive control of SREBP activation | 8     | 4     | 8     | 6     | 4     |
| Citric acid cycle                                 | 1     | 2     | >     | 14    | 8     |
| ER unfolded protein response pathway              | 14    | 7     | 5     | 2     | >     |
| Mammalian target of rapamycin signaling pathway   | >     | 9     | 7     | 5     | 10    |
| Cholesterol synthesis                             | 10    | >     | 2     | >     | 2     |
| Desaturation of fatty acids                       | >     | >     | 10    | 1     | 6     |
| Protein folding in mitochondria                   | >     | 4     | 14    | >     | 14    |
| Electron transport chain                          | 5     | >     | >     | 12    | >     |
| Fibrillar collagen core structure organization    | >     | >     | 1     | >     | >     |
| Glycolysis and Gluconeogenesis                    | 2     | >     | >     | >     | >     |
| Fatty acid elongation                             | >     | >     | >     | 3     | >     |

|                                                           | MSN01 | MSN05 | MSN06 | MSN08 | MSN09 |
|-----------------------------------------------------------|-------|-------|-------|-------|-------|
| WNT-Beta-catenin signaling pathway                        | >     | 3     | >     | >     | 6     |
| Hippo signaling                                           | >     | 6     | 1     | >     | 6     |
| CCN family receptor signaling                             | 1     | 8     | >     | >     | 3     |
| HIF-1 receptor signaling pathway                          | 4     | 5     | 6     | >     | 3     |
| ECM breakdown & membrane shedding by adamalysins          | >     | 4     | 5     | 6     | >     |
| HIF-1 receptor signaling pathway                          | >     | 7     | 8     | >     | 1     |
| Fibrillar collagen core structure organization            | >     | 1     | >     | 2     | 1     |
| Gap junction organization                                 | >     | 1     | >     | 2     | 4     |
| Macrophage migration inhibitory factor signaling          | >     | 8     | >     | 1     | 4     |
| Microtubule crosslinking and bundling                     | >     | 12    | 3     | 11    | 4     |
| Microtubule crosslinking and bundling                     | >     | 12    | 4     | >     | 4     |
| Collagen fibril organization by fibril-associated bridges | >     | 2     | >     | >     | 2     |
| Retinol metabolism                                        | >     | 2     | >     | >     | 2     |
| Caveolin-mediated endocytosis                             | >     | 2     | >     | >     | 2     |
| Tenascin receptor signaling                               | >     | 3     | >     | >     | 3     |
| Adherens junction organization                            | >     | 3     | >     | >     | 4     |
| Tight junction organization                               | >     | 4     | >     | >     | 5     |
| Water TM transport                                        | >     | 4     | >     | >     | 5     |
| Leukocyte transmigration through endothelium              | >     | 5     | >     | >     | 5     |

**no1stSVD**

|                                                  | MSN01 | MSN05 | MSN06 | MSN08 | MSN09 |
|--------------------------------------------------|-------|-------|-------|-------|-------|
| Centrosome separation                            | 1     | 8     | 2     | 1     | 2     |
| Serine and glycine metabolism                    | 9     | 1     | 5     | 4     | 8     |
| Eukaryotic kinetochore dynamics                  | >     | 16    | 1     | 2     | 1     |
| Metaphase to anaphase checkpoint                 | >     | 16    | 3     | 3     | 4     |
| Mitotic spindle assembly                         | >     | 17    | 4     | 5     | 3     |
| Sister chromatid segregation                     | >     | 3     | 11    | 20    | 12    |
| Centrosome maturation                            | >     | 3     | 11    | 10    | 12    |
| Cholesterol synthesis                            | 18    | 5     | >     | >     | >     |
| Glycolysis and Gluconeogenesis                   | 2     | >     | >     | >     | >     |
| Selectin-mediated Leukocyte rolling              | >     | >     | >     | >     | >     |
| GABA metabolism                                  | >     | >     | >     | >     | >     |
| Fibrillar collagen core structure organization   | 3     | >     | >     | >     | >     |
| Fibronectin synthesis and extracellular assembly | 5     | >     | >     | >     | >     |
| Thin myofibril organization                      | 5     | >     | >     | >     | >     |

|                                                           | MSN01 | MSN05 | MSN06 | MSN08 | MSN09 |
|-----------------------------------------------------------|-------|-------|-------|-------|-------|
| Z-disc organization                                       | >     | 5     | 1     | 1     | 2     |
| Thin myofibril organization                               | >     | 3     | 4     | 2     | 3     |
| Epithelial intermediate filament dynamics                 | >     | 6     | >     | 3     | 4     |
| Fibrillar collagen core structure organization            | >     | 1     | >     | 11    | 12    |
| Collagen fibril organization by fibril-associated bridges | >     | 2     | >     | 7     | 8     |
| Potassium TM transport                                    | >     | 2     | 5     | 10    | >     |
| Gap junction organization                                 | >     | 2     | >     | 18    | >     |
| Glycolysis and Gluconeogenesis                            | >     | >     | >     | >     | 1     |
| CM repolarization during AP & hyperpol.                   | >     | 2     | >     | >     | >     |
| ECM breakdown & membrane shedding by adamalysins          | >     | 2     | >     | >     | >     |
| Microtubule crosslinking and bundling                     | >     | 3     | >     | >     | >     |
| Connection of muscle sarcomere to plasma membrane         | >     | 3     | >     | >     | >     |
| Tenascin receptor signaling                               | >     | 4     | >     | >     | >     |
| Hepatocyte growth factor receptor signaling               | >     | 4     | >     | >     | >     |
| Amyloid plaque organization                               | >     | 4     | >     | >     | >     |
| Thick myofibril organization                              | >     | 4     | >     | >     | 5     |
| Glycogen synthesis and glycogenolysis                     | >     | 5     | >     | >     | >     |
| Fibroblast growth factor receptor signaling               | >     | 5     | >     | >     | >     |

**no1stSVD**

|                                                   | MSN01 | MSN05 | MSN06 | MSN08 | MSN09 |
|---------------------------------------------------|-------|-------|-------|-------|-------|
| Serine and glycine metabolism                     | 4     | 1     | 3     | 5     | 1     |
| Lysosomal glycoprotein degradation                | 8     | 4     | 4     | 8     | 4     |
| Cholesterol-sensitive control of SREBP activation | 8     | 4     | 8     | 8     | 4     |
| Citric acid cycle                                 | 1     | 2     | >     | 1     | 3     |
| ER unfolded protein response pathway              | >     | 7     | 5     | 3     | >     |
| Cholesterol synthesis                             | 13    | >     | 2     | >     | 2     |
| Desaturation of fatty acids                       | >     | >     | 10    | 2     | 6     |
| Electron transport chain                          | 3     | 8     | >     | 13    | >     |
| Protein folding in mitochondria                   | 5     | 15    | >     | >     | 12    |
| Fibrillar collagen core structure organization    | >     | >     | 1     | >     | >     |
| Glycolysis and Gluconeogenesis                    | 2     | >     | >     | >     | >     |
| Fatty acid elongation                             | >     | >     | >     | 4     | >     |

|                                                           | MSN01 | MSN05 | MSN06 | MSN08 | MSN09 |
|-----------------------------------------------------------|-------|-------|-------|-------|-------|
| CCN family receptor signaling                             | 1     | 8     | >     | >     | 3     |
| HIF-1 receptor signaling pathway                          | >     | 6     | 1     | >     | 6     |
| WNT-Beta-catenin signaling pathway                        | >     | 3     | 5     | 7     | >     |
| Gap junction organization                                 | >     | 1     | 1     | 3     | >     |
| Fibrillar collagen core structure organization            | >     | 1     | >     | 7     | 4     |
| Microtubule polymerization                                | >     | 8     | >     | 1     | 4     |
| Macrophage migration inhibitory factor signaling          | >     | 8     | >     | 1     | 4     |
| ECM breakdown & membrane shedding by adamalysins          | >     | 4     | 5     | >     | 3     |
| Semaphorin signaling                                      | >     | 12    | 3     | 9     | >     |
| Collagen fibril organization by fibril-associated bridges | >     | 12    | 3     | >     | 4     |
| Tenascin receptor signaling                               | >     | 2     | >     | >     | 2     |
| Retinol metabolism                                        | >     | 2     | >     | >     | 2     |
| Caveolin-mediated endocytosis                             | >     | 2     | >     | >     | 2     |
| Tight junction organization                               | >     | 3     | >     | >     | 4     |
| Water TM transport                                        | >     | 4     | >     | >     | 5     |
| Intrinsic apoptosis pathway                               | >     | 4     | >     | >     | 5     |
| Cardiomyocyte pacemaker current generation                | >     | 5     | >     | >     | 5     |

**decomposed**

|                                                  | MSN01 | MSN05 | MSN06 | MSN08 | MSN09 |
|--------------------------------------------------|-------|-------|-------|-------|-------|
| Centrosome separation                            | 1     | 1     | 1     | 1     | 1     |
| Metaphase to anaphase checkpoint                 | 3     | 3     | 3     | 3     | 3     |
| Eukaryotic kinetochore dynamics                  | 2     | 7     | 2     | 2     | 2     |
| Mitotic spindle assembly                         | 4     | 6     | 4     | 4     | 4     |
| Serine and glycine metabolism                    | 10    | 4     | 5     | 5     | 5     |
| Mitotic H3 phosphorylation and dephosphorylation | 5     | 8     | 6     | 6     | 6     |
| Contractile ring constriction                    | 13    | 2     | 6     | 18    | 6     |
| Cholesterol synthesis                            | >     | 5     | >     | >     | >     |

|                                                           | MSN01 | MSN05 | MSN06 | MSN08 | MSN09 |
|-----------------------------------------------------------|-------|-------|-------|-------|-------|
| Fibrillar collagen core structure organization            | 10    | 1     | 3     | 10    | 3     |
| Z-disc organization                                       | >     | 4     | 1     | 1     | 1     |
| Thin myofibril organization                               | >     | 2     | 6     | 2     | >     |
| Epithelial intermediate filament dynamics                 | >     | 5     | 6     | 4     | 4     |
| ECM breakdown & membrane shedding by adamalysins          | >     | 8     | >     | 2     | 6     |
| Cardiomyocyte pacemaker current generation                | >     | 6     | 8     | 4     | >     |
| Thick myofibril organization                              | >     | 4     | 3     | 3     | >     |
| Retinol metabolism                                        | >     | 3     | 4     | 4     | >     |
| Collagen fibril organization by fibril-associated bridges | >     | 2     | 5     | >     | >     |
| Amyloid degradation, uptake and aggregation inhibition    | >     | 1     | >     | >     | >     |
| Thrombospondin receptor signaling                         | >     | 2     | >     | >     | >     |
| Osteonectin receptor signaling                            | >     | 2     | >     | >     | >     |
| Muscarinic receptor signaling                             | >     | 4     | >     | >     | >     |
| CCN family receptor signaling                             | >     | 4     | >     | 5     | >     |

**decomposed**

|                                                   | MSN01 | MSN05 | MSN06 | MSN08 | MSN09 |
|---------------------------------------------------|-------|-------|-------|-------|-------|
| Serine and glycine metabolism                     | 4     | 1     | 3     | 5     | 1     |
| Lysosomal glycoprotein degradation                | 8     | 4     | 4     | 8     | 4     |
| Cholesterol-sensitive control of SREBP activation | 8     | 4     | 8     | 8     | 4     |
| Citric acid cycle                                 | 1     | 2     | >     | 1     | 3     |
| ER unfolded protein response pathway              | >     | 7     | 5     | 3     | >     |
| Cholesterol synthesis                             | 13    | >     | 2     | >     | 2     |
| Desaturation of fatty acids                       | >     | >     | 10    | 2     | 6     |
| Electron transport chain                          | 3     | 8     | >     | 13    | >     |
| Protein folding in mitochondria                   | 5     | 15    | >     | >     | 12    |
| Fibrillar collagen core structure organization    | >     | >     | 1     | >     | >     |
| Glycolysis and Gluconeogenesis                    | 2     | >     | >     | >     | >     |
| Fatty acid elongation                             | >     | >     | >     | 4     | >     |

|                                                           | MSN01 | MSN05 | MSN06 | MSN08 | MSN09 |
|-----------------------------------------------------------|-------|-------|-------|-------|-------|
| CCN family receptor signaling                             | 1     | 8     | >     | >     | 3     |
| HIF-1 receptor signaling pathway                          | >     | 6     | 1     | >     | 6     |
| WNT-Beta-catenin signaling pathway                        | >     | 3     | 5     | 7     | >     |
| Gap junction organization                                 | >     | 1     | 1     | 3     | >     |
| Fibrillar collagen core structure organization            | >     | 1     | >     | 7     | 4     |
| Microtubule polymerization                                | >     | 8     | >     | 1     | 4     |
| Macrophage migration inhibitory factor signaling          | >     | 8     | >     | 1     | 4     |
| ECM breakdown & membrane shedding by adamalysins          | >     | 4     | 5     | >     | 3     |
| Semaphorin signaling                                      | >     | 12    | 3     | 9     | >     |
| Collagen fibril organization by fibril-associated bridges | >     | 12    | 3     | >     | 4     |
| Tenascin receptor signaling                               | >     | 2     | >     | >     | 2     |
| Retinol metabolism                                        | >     | 2     | >     | >     | 2     |
| Caveolin-mediated endocytosis                             | >     | 2     | >     | >     | 2     |
| Tight junction organization                               | >     | 3     | >     | >     | 4     |
| Water TM transport                                        | >     | 4     | >     | >     | 5     |
| Intrinsic apoptosis pathway                               | >     | 4     | >     | >     | 5     |
| Cardiomyocyte pacemaker current generation                | >     | 5     | >     | >     | 5     |

**MBCOL3  
ponatinib  
(is c.toxic: yes)**

**MBCOL3  
regorafenib  
(is c.toxic: no)**

**Upregulated**

**Downregulated**

**Upregulated**

**Downregulated**

**complete**

|                                                | MSN01 | MSN02 | MSN05 | MSN06 | MSN08 | MSN09 |
|------------------------------------------------|-------|-------|-------|-------|-------|-------|
| Centrosome separation                          | 1     | 1     | 1     | 3     | 3     | 3     |
| Mitotic spindle assembly                       | 4     | 2     | 4     | 2     | 2     | 2     |
| Metaphase to anaphase checkpoint               | 8     | 5     | 3     | 4     | 4     | 4     |
| Centrosome maturation                          | 14    | 4     | 5     | 5     | 6     | 6     |
| Sister chromatid segregation                   | 5     | 7     | 6     | 8     | 16    | 16    |
| Serine and glycine metabolism                  | 2     | 3     | 13    | 24    | 26    | 26    |
| Eukaryotic kinetochore dynamics                | 6     | 7     | 2     | 1     | 1     | 1     |
| Albumin mediated blood protein transport       | 12    | 4     | >     | >     | >     | >     |
| Contractile ring constriction                  | >     | >     | 15    | 5     | >     | >     |
| Glycolysis and Gluconeogenesis                 | >     | 1     | >     | >     | >     | >     |
| Prostaglandin E2 receptor signaling            | >     | 2     | >     | >     | >     | >     |
| Fibrillar collagen core structure organization | 3     | >     | >     | >     | >     | >     |
| Carnitine shuttle                              | >     | 3     | >     | >     | >     | >     |
| Verhagen synthesis                             | >     | 4     | >     | >     | >     | >     |

|                                                           | MSN01 | MSN02 | MSN05 | MSN06 | MSN08 | MSN09 |
|-----------------------------------------------------------|-------|-------|-------|-------|-------|-------|
| Z-disc organization                                       | >     | 9     | 1     | 2     | 3     | >     |
| Thin myofibril organization                               | >     | 5     | 2     | 3     | >     | >     |
| VEGF receptor signaling                                   | >     | 11    | 3     | 7     | 4     | >     |
| Fibrillar collagen core structure organization            | >     | 4     | 4     | 3     | 3     | >     |
| CCN family receptor signaling                             | >     | 4     | 4     | 3     | 3     | >     |
| GM-CSF receptor signaling                                 | >     | 11    | 3     | 4     | 14    | >     |
| Natriuretic peptide receptor signaling                    | >     | 6     | 3     | 10    | 5     | >     |
| ECM breakdown & membrane shedding by adamalysins          | >     | 6     | 3     | 10    | 5     | >     |
| Collagen fibril organization by fibril-associated bridges | >     | 6     | 3     | 10    | 5     | >     |
| Caveolin-mediated endocytosis                             | >     | 2     | 10    | >     | >     | >     |
| Glycolysis and Gluconeogenesis                            | >     | 1     | >     | 1     | >     | >     |
| Cholesterol synthesis                                     | >     | 1     | >     | 1     | >     | >     |
| Anchoring of nuclear membrane to cytoskeleton             | >     | 2     | >     | >     | 1     | >     |
| Amyloid degradation, uptake and aggregation inhibition    | >     | 2     | >     | >     | 2     | >     |
| Fibronectin synthesis and extracellular assembly          | >     | 2     | >     | >     | 2     | >     |
| Non-vesicular phospholipid transport                      | >     | 2     | >     | >     | 4     | >     |
| Hemidesmosome organization                                | >     | 2     | >     | >     | 4     |       |

**MBCOL3  
ruxolitinib  
(is c.toxic: no)**

**MBCOL3  
sorafenib  
(is c.toxic: yes)**

**Upregulated**

**Downregulated**

**Upregulated**

**Downregulated**

**complete**

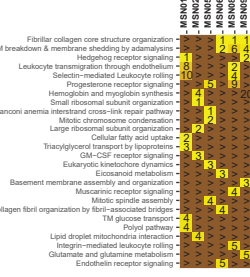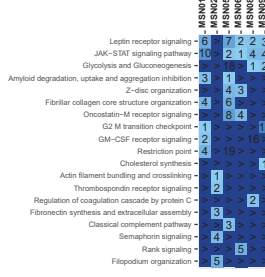

**complete**

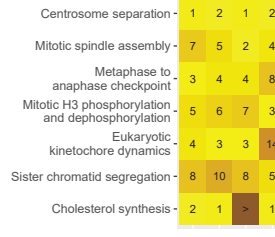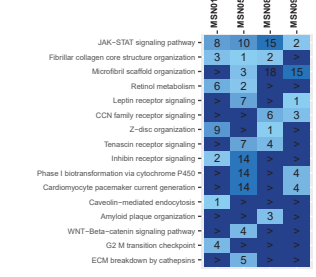

**no1stSVD**

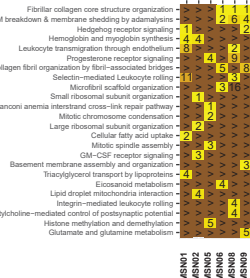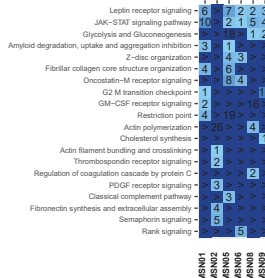

**no1stSVD**

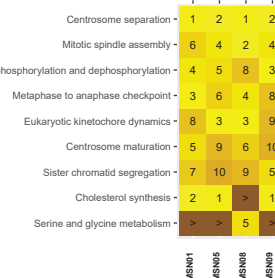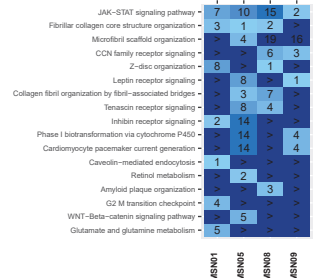

**decomposed**

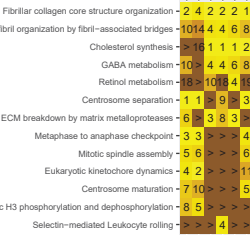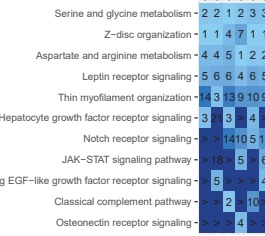

**decomposed**

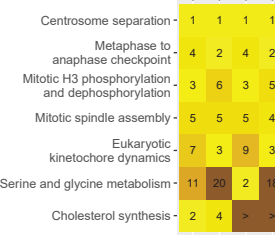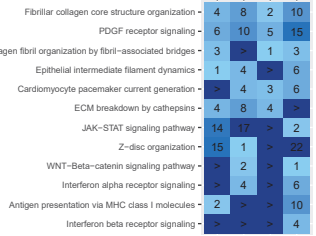

**MBCOL3  
sunitinib  
(is c.toxic: yes)**

**MBCOL3  
tofacitinib  
(is c.toxic: no)**

**Upregulated**

**Downregulated**

**Upregulated**

**Downregulated**

**complete**

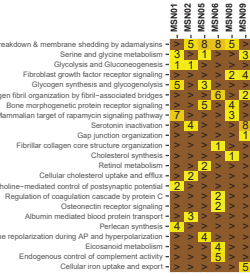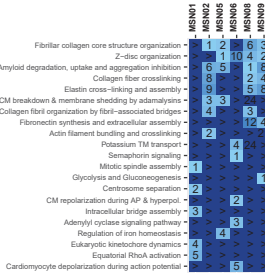

**complete**

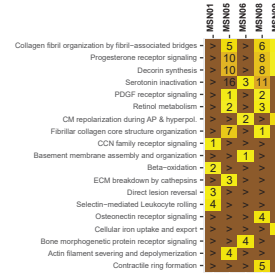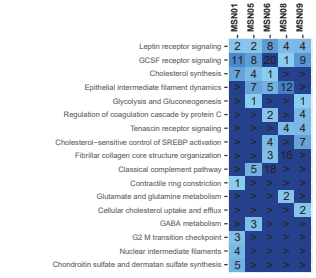

**no1stSVD**

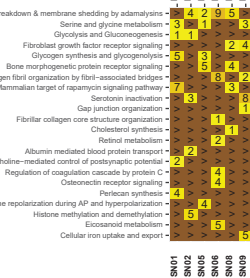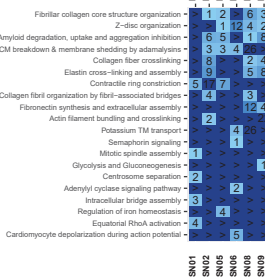

**no1stSVD**

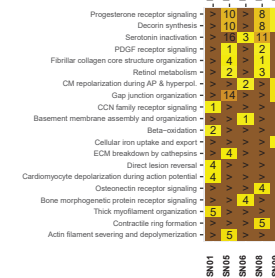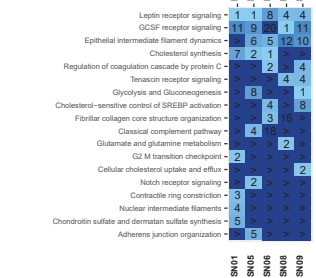

**decomposed**

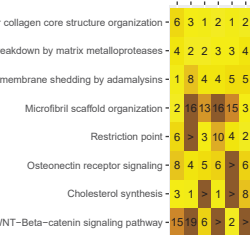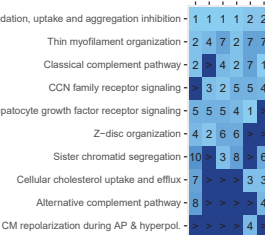

**decomposed**

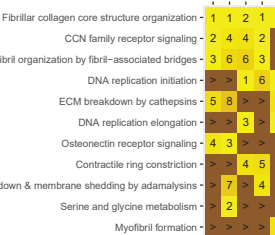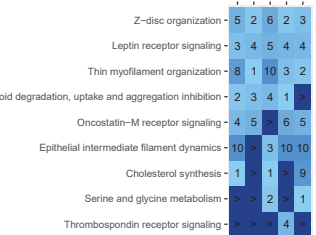

**MBCOL3  
trametinib  
(is c.toxic: yes)**

**MBCOL3  
vandetanib  
(is c.toxic: yes)**

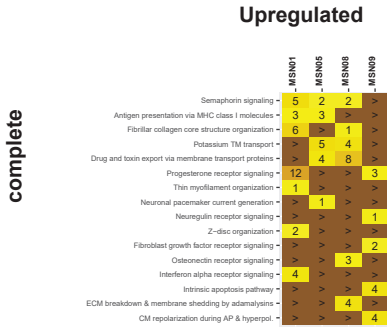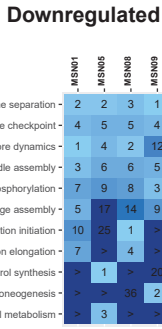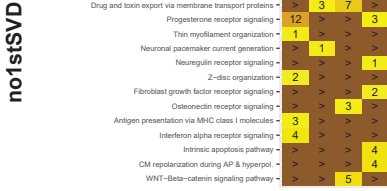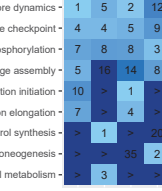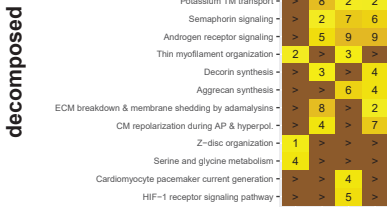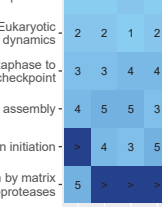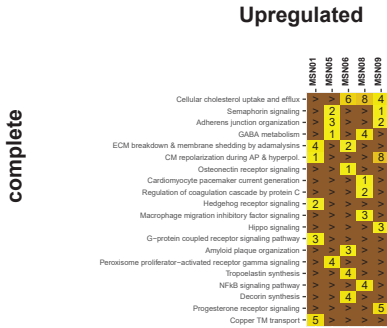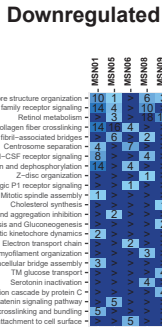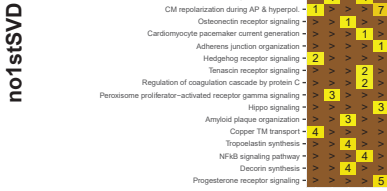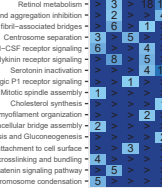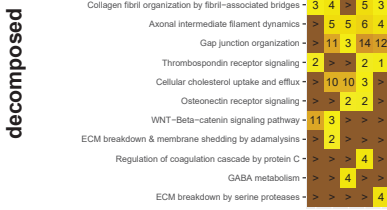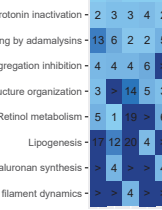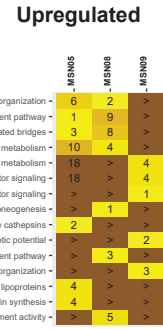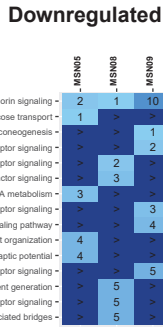

**complete**

**no1stSVD**

**decomposed**

**complete**

**no1stSVD**

**decomposed**

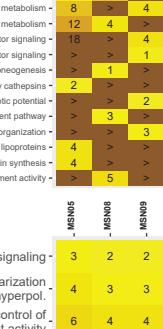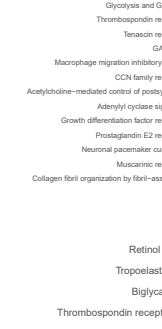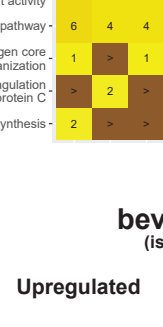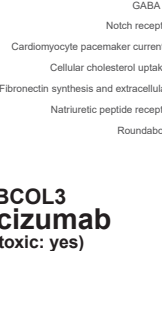

**MBCOL3  
cetuximab  
(is c.toxic: no)**

**MBCOL3  
rituximab  
(is c.toxic: no)**

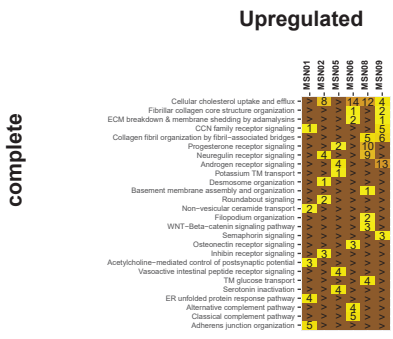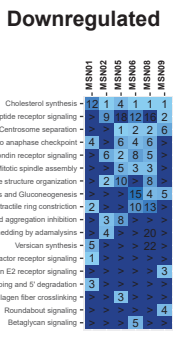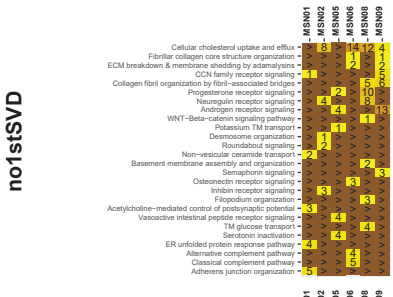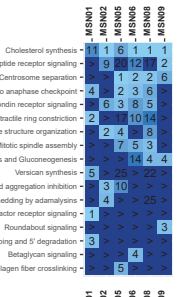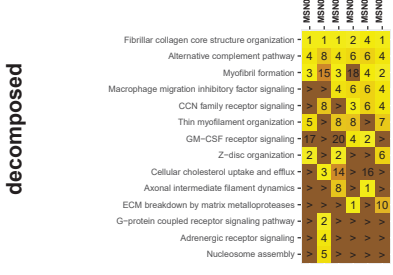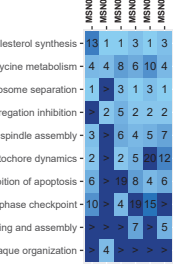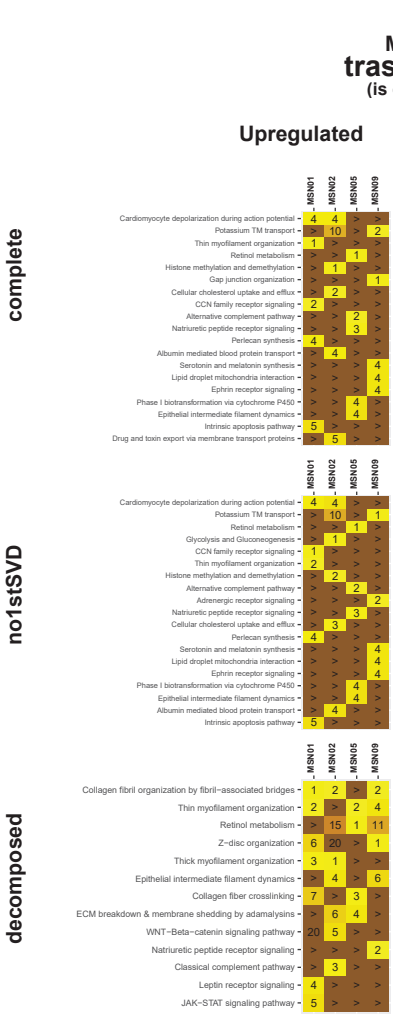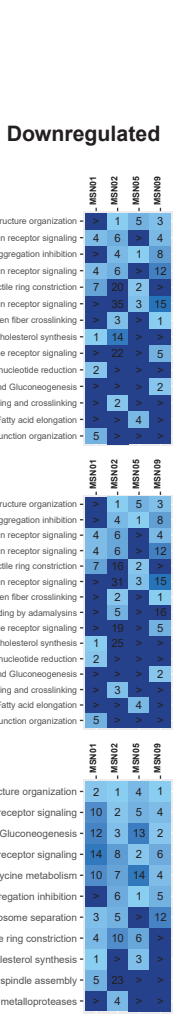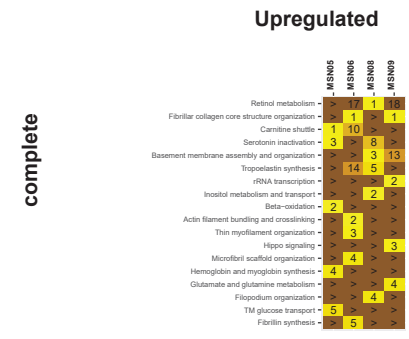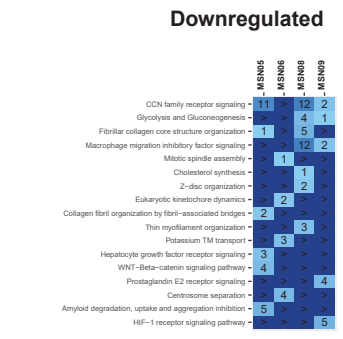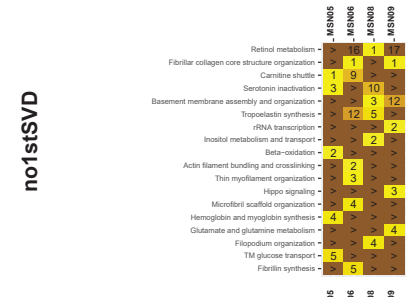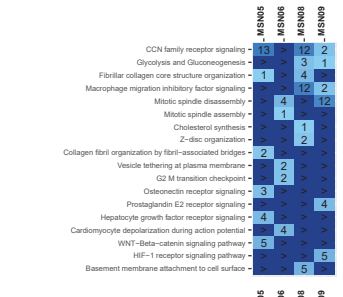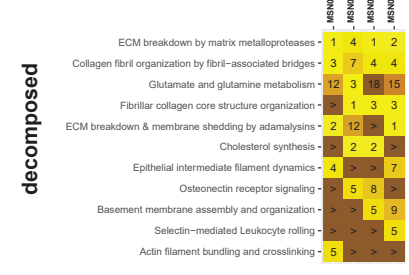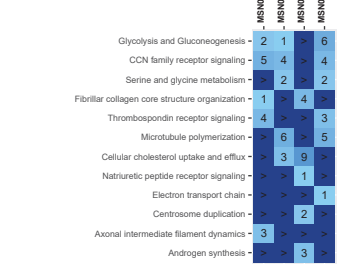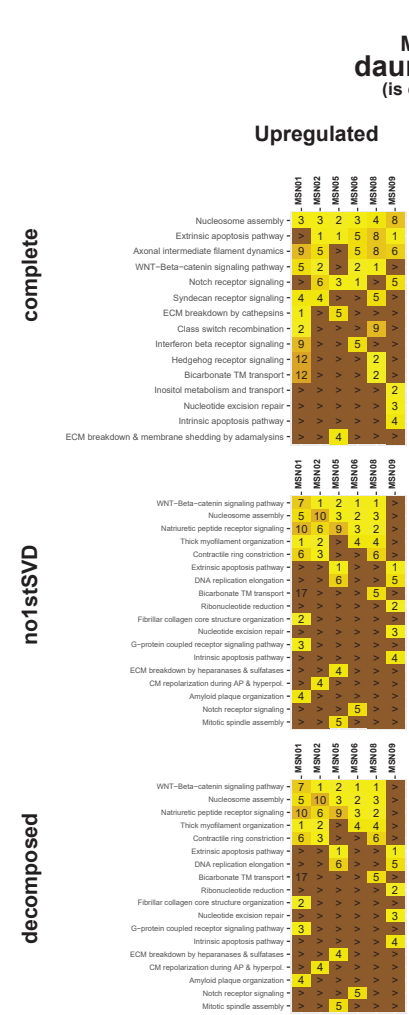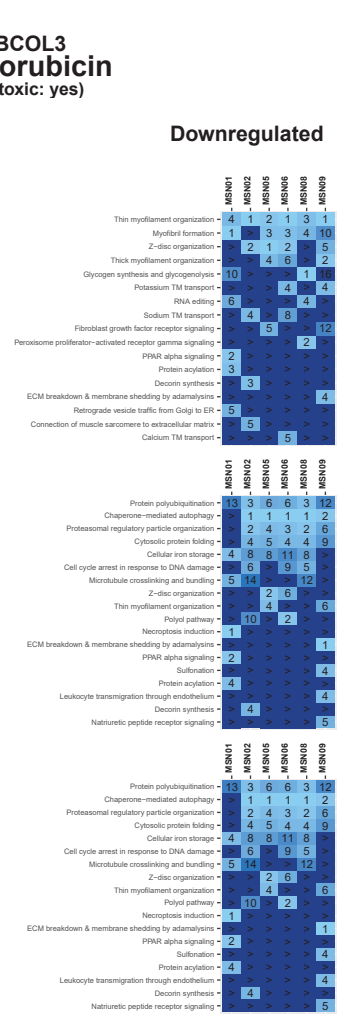

**MBCOL3  
trastuzumab  
(is c.toxic: yes)**

**MBCOL3  
daunorubicin  
(is c.toxic: yes)**

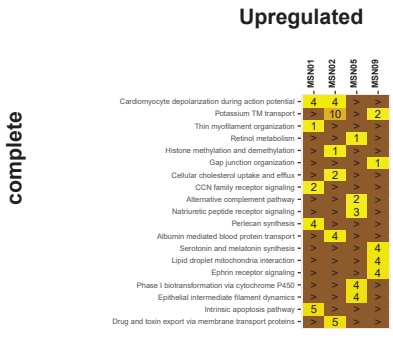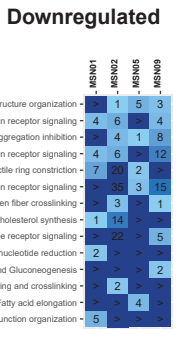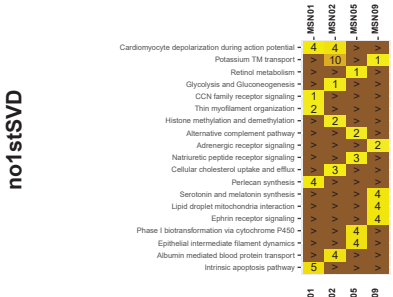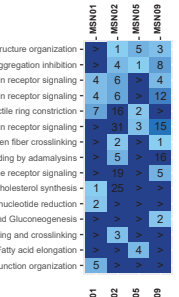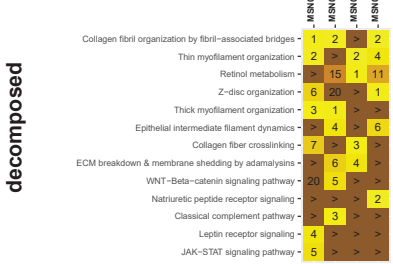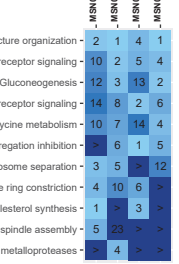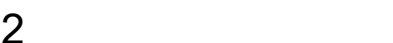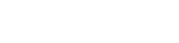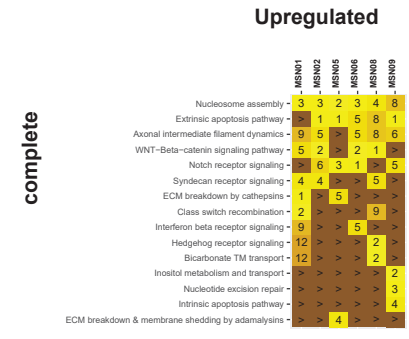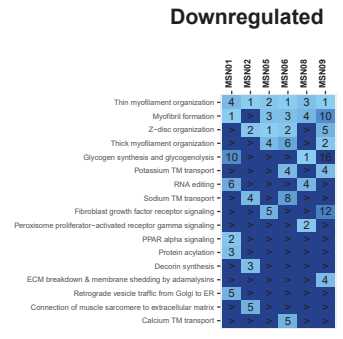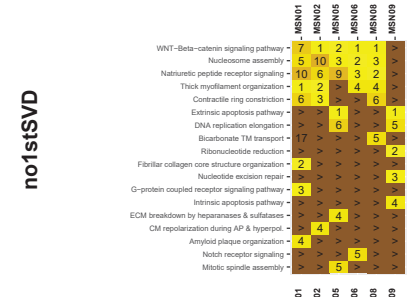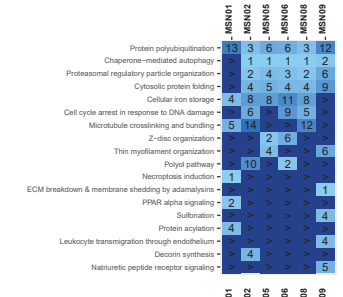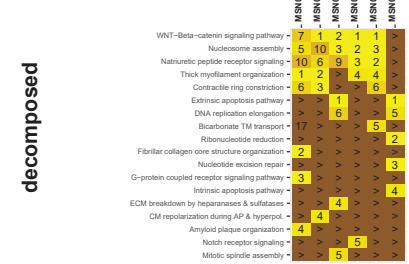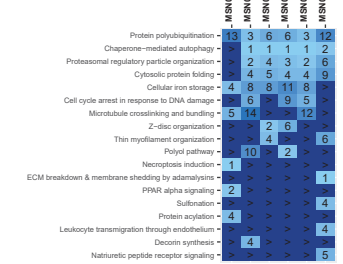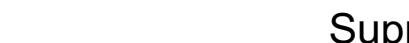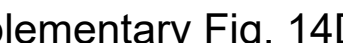

**MBCOL3  
doxorubicin**  
(is c.toxic: yes)

**MBCOL3  
epirubicin**  
(is c.toxic: yes)

**Upregulated**

**Downregulated**

**Upregulated**

**Downregulated**

**complete**

|                                                          | MSN01 | MSN05 | MSN06 | MSN08 |
|----------------------------------------------------------|-------|-------|-------|-------|
| Nucleosome assembly                                      | 2     | 3     | 1     | 2     |
| Extrinsic apoptosis pathway                              | 6     | 6     | 8     | 1     |
| Syndecan receptor signaling                              | 4     | 2     | 4     |       |
| WNT-Beta-catenin signaling pathway                       | 7     | 1     | 3     |       |
| Axonal intermediate filament dynamics                    | 6     | 6     | 2     |       |
| Prostaglandin E2 receptor signaling                      | >     | 5     | 6     |       |
| Motilin receptor signaling                               | 1     | >     | >     |       |
| Intrinsic apoptosis pathway                              | >     | >     | >     | 3     |
| Cannabinoid receptor signaling                           | 4     | >     | >     |       |
| Hedgehog receptor signaling                              | >     | 4     | >     |       |
| Acetylcholine-mediated control of postsynaptic potential | >     | >     | >     | 5     |
| Notch receptor signaling                                 | >     | >     | >     | 4     |
| Nodal growth differentiation factor receptor signaling   | >     | >     | 5     |       |

|                                              | MSN01 | MSN05 | MSN06 | MSN08 |
|----------------------------------------------|-------|-------|-------|-------|
| Thin myofilament organization                | 2     | >     | 1     | 1     |
| Actin polymerization                         | 5     | >     | 3     |       |
| Myofibril formation                          | >     | 2     | >     | 7     |
| Progesterone synthesis                       | 1     | >     | >     |       |
| Mitochondrial transport                      | >     | 2     | >     |       |
| Potassium TM transport                       | >     | >     | >     | 2     |
| Glycolysis and Gluconeogenesis               | >     | >     | 2     |       |
| Transamination pathways                      | 2     | >     | >     |       |
| Sulfonation                                  | >     | >     | >     | 4     |
| Leukocyte transmigration through endothelium | >     | >     | >     | 4     |
| Androgen synthesis                           | 4     | >     | >     |       |
| Natriuretic peptide receptor signaling       | >     | >     | >     | 5     |

**complete**

|                                                | MSN01 | MSN05 | MSN06 | MSN08 |
|------------------------------------------------|-------|-------|-------|-------|
| ECM breakdown by cathepsins                    | 4     | 1     | 6     | 2     |
| Amyloid plaque organization                    | 6     | 3     | 2     | 6     |
| Lysosomal lipid degradation                    | 2     | 6     | 4     | 8     |
| Fibrillar collagen core structure organization | 1     | 21    | 1     | 4     |
| Basement membrane attachment to cell surface   | 2     | 6     | 4     | 21    |
| Syndecan receptor signaling                    | 16    | 2     | 8     | 18    |
| ECM breakdown by matrix metalloproteases       | 26    | 19    | 5     | >     |
| Metabolism of branched-chain amino acids       | >     | 14    | >     | 1     |
| Beta-oxidation                                 | 18    | >     | >     | 3     |
| Lysosomal glycosaminoglycan degradation        | >     | 4     | >     |       |
| Basement membrane assembly and organization    | 4     | >     | >     |       |

|                                                  | MSN01 | MSN05 | MSN06 | MSN08 |
|--------------------------------------------------|-------|-------|-------|-------|
| Myofibril formation                              | 2     | >     | >     | 2     |
| Glycogen synthesis and glycogenolysis            | 1     | 3     | >     |       |
| Macrophage migration inhibitory factor signaling | >     | 6     | 2     |       |
| GM-CSF receptor signaling                        | >     | 4     | 6     |       |
| Protein acylation                                | 4     | 3     | 8     |       |
| Purinergic P1 receptor signaling                 | >     | 5     | 8     |       |
| Thin myofilament organization                    | >     | 1     | 3     |       |
| Small ribosomal subunit organization             | >     | >     | 1     |       |
| Natriuretic peptide receptor signaling           | >     | >     | >     | 1     |
| Chromatin targeting to lamina                    | 2     | >     | >     |       |
| Sister chromatid cohesion                        | 3     | >     | >     |       |
| Large ribosomal subunit organization             | >     | >     | 3     |       |
| Insulin receptor signaling                       | >     | >     | >     | 3     |
| Lamellipodium organization                       | >     | >     | >     | 4     |
| Electron transport chain                         | >     | >     | >     | 4     |
| Chromatin organization by insulator proteins     | 4     | >     | >     |       |
| Cholesterol synthesis                            | >     | >     | >     | 5     |

**no1stSVD**

|                                                        | MSN01 | MSN05 | MSN06 | MSN08 |
|--------------------------------------------------------|-------|-------|-------|-------|
| WNT-Beta-catenin signaling pathway                     | 3     | 1     | 1     |       |
| Natriuretic peptide receptor signaling                 | 1     | 3     | 2     |       |
| Nucleosome assembly                                    | 2     | 4     | 5     |       |
| Thick myofilament organization                         | 4     | 5     | 4     |       |
| Extrinsic apoptosis pathway                            | >     | 10    | >     | 2     |
| Nucleotide excision repair                             | >     | >     | >     | 1     |
| Syndecan receptor signaling                            | >     | 2     | >     |       |
| Nodal growth differentiation factor receptor signaling | >     | >     | 3     |       |
| Inositol metabolism and transport                      | >     | >     | >     | 3     |
| Ribonucleotide reduction                               | >     | >     | >     | 4     |
| Intrinsic apoptosis pathway                            | >     | >     | >     | 5     |

|                                                  | MSN01 | MSN05 | MSN06 | MSN08 |
|--------------------------------------------------|-------|-------|-------|-------|
| Chaperone-mediated autophagy                     | 1     | 2     | 2     | 1     |
| Cellular iron storage                            | 6     | 4     | 4     |       |
| Protein polyubiquitination                       | 2     | 1     | 12    |       |
| Hepatocyte growth factor receptor signaling      | 4     | >     | 2     | 14    |
| Cytosolic protein folding                        | 3     | >     | >     | 10    |
| CD44-mediated leukocyte rolling                  | 4     | >     | >     | 14    |
| Neurotosis induction                             | >     | 1     | >     |       |
| ECM breakdown & membrane shedding by adamalysins | >     | >     | >     | 2     |
| Z-disc organization                              | >     | >     | >     | 3     |
| Heme degradation to bilirubin                    | >     | 4     | >     |       |
| Collagen fiber crosslinking                      | >     | >     | >     | 4     |
| Natriuretic peptide receptor signaling           | >     | >     | >     | 5     |

**no1stSVD**

|                                                | MSN01 | MSN05 | MSN06 | MSN08 |
|------------------------------------------------|-------|-------|-------|-------|
| Fibrillar collagen core structure organization | 1     | 9     | 1     | 4     |
| Amyloid plaque organization                    | 6     | 5     | 3     | 6     |
| Lysosomal lipid degradation                    | 2     | 7     | 4     | 8     |
| ECM breakdown by cathepsins                    | 4     | 1     | 18    | 2     |
| Basement membrane attachment to cell surface   | 2     | 2     | 2     | 21    |
| Basement membrane assembly and organization    | 4     | 4     | >     |       |
| Antigen presentation via MHC class I molecules | >     | 4     | 7     |       |
| Beta-oxidation                                 | 18    | >     | >     | 3     |
| Metabolism of branched-chain amino acids       | >     | 26    | >     | 1     |
| Fibulin receptor signaling                     | >     | >     | 5     |       |

|                                                  | MSN01 | MSN05 | MSN06 | MSN08 |
|--------------------------------------------------|-------|-------|-------|-------|
| GM-CSF receptor signaling                        | >     | 2     | >     | 1     |
| Myofibril formation                              | >     | 1     | >     | 4     |
| Macrophage migration inhibitory factor signaling | >     | 3     | >     | 2     |
| Protein acylation                                | 4     | >     | 6     |       |
| Large ribosomal subunit organization             | >     | >     | 1     |       |
| Glycogen synthesis and glycogenolysis            | 1     | >     | >     |       |
| Small ribosomal subunit organization             | >     | >     | 2     |       |
| Chromatin targeting to lamina                    | 2     | >     | >     |       |
| Sister chromatid cohesion                        | 3     | >     | >     |       |
| Neoptosis induction                              | >     | >     | 3     |       |
| Natriuretic peptide receptor signaling           | >     | >     | >     | 3     |
| Myelin biogenesis and maturation                 | >     | 4     | >     |       |
| Cholesterol synthesis                            | >     | 4     | >     |       |
| Chromatin organization by insulator proteins     | 4     | >     | >     |       |
| Thin myofilament organization                    | >     | 5     | >     |       |
| Insulin receptor signaling                       | >     | >     | >     | 5     |

**decomposed**

|                                                        | MSN01 | MSN05 | MSN06 | MSN08 |
|--------------------------------------------------------|-------|-------|-------|-------|
| WNT-Beta-catenin signaling pathway                     | 3     | 1     | 1     |       |
| Natriuretic peptide receptor signaling                 | 1     | 3     | 2     |       |
| Nucleosome assembly                                    | 2     | 4     | 5     |       |
| Thick myofilament organization                         | 4     | 5     | 4     |       |
| Extrinsic apoptosis pathway                            | >     | 10    | >     | 2     |
| Nucleotide excision repair                             | >     | >     | >     | 1     |
| Syndecan receptor signaling                            | >     | 2     | >     |       |
| Nodal growth differentiation factor receptor signaling | >     | >     | 3     |       |
| Inositol metabolism and transport                      | >     | >     | >     | 3     |
| Ribonucleotide reduction                               | >     | >     | >     | 4     |
| Intrinsic apoptosis pathway                            | >     | >     | >     | 5     |

|                                                  | MSN01 | MSN05 | MSN06 | MSN08 |
|--------------------------------------------------|-------|-------|-------|-------|
| Chaperone-mediated autophagy                     | 1     | 2     | 2     | 1     |
| Cellular iron storage                            | 6     | 4     | 4     |       |
| Protein polyubiquitination                       | 2     | 1     | 12    |       |
| Hepatocyte growth factor receptor signaling      | 4     | >     | 2     | 14    |
| Cytosolic protein folding                        | 3     | >     | >     | 10    |
| CD44-mediated leukocyte rolling                  | 4     | >     | >     | 14    |
| Neurotosis induction                             | >     | 1     | >     |       |
| ECM breakdown & membrane shedding by adamalysins | >     | >     | >     | 2     |
| Z-disc organization                              | >     | >     | >     | 3     |
| Heme degradation to bilirubin                    | >     | 4     | >     |       |
| Collagen fiber crosslinking                      | >     | >     | >     | 4     |
| Natriuretic peptide receptor signaling           | >     | >     | >     | 5     |

**decomposed**

|                                                | MSN01 | MSN05 | MSN06 | MSN08 |
|------------------------------------------------|-------|-------|-------|-------|
| Fibrillar collagen core structure organization | 1     | 9     | 1     | 4     |
| Amyloid plaque organization                    | 6     | 5     | 3     | 6     |
| Lysosomal lipid degradation                    | 2     | 7     | 4     | 8     |
| ECM breakdown by cathepsins                    | 4     | 1     | 18    | 2     |
| Basement membrane attachment to cell surface   | 2     | 2     | 2     | 21    |
| Basement membrane assembly and organization    | 4     | 4     | >     |       |
| Antigen presentation via MHC class I molecules | >     | 4     | 7     |       |
| Beta-oxidation                                 | 18    | >     | >     | 3     |
| Metabolism of branched-chain amino acids       | >     | 26    | >     | 1     |
| Fibulin receptor signaling                     | >     | >     | 5     |       |

|                                                  | MSN01 | MSN05 | MSN06 | MSN08 |
|--------------------------------------------------|-------|-------|-------|-------|
| GM-CSF receptor signaling                        | >     | 2     | >     | 1     |
| Myofibril formation                              | >     | 1     | >     | 4     |
| Macrophage migration inhibitory factor signaling | >     | 3     | >     | 2     |
| Protein acylation                                | 4     | >     | 6     |       |
| Large ribosomal subunit organization             | >     | >     | 1     |       |
| Glycogen synthesis and glycogenolysis            | 1     | >     | >     |       |
| Small ribosomal subunit organization             | >     | >     | 2     |       |
| Chromatin targeting to lamina                    | 2     | >     | >     |       |
| Sister chromatid cohesion                        | 3     | >     | >     |       |
| Neoptosis induction                              | >     | >     | 3     |       |
| Natriuretic peptide receptor signaling           | >     | >     | >     | 3     |
| Myelin biogenesis and maturation                 | >     | 4     | >     |       |
| Cholesterol synthesis                            | >     | 4     | >     |       |
| Chromatin organization by insulator proteins     | 4     | >     | >     |       |
| Thin myofilament organization                    | >     | 5     | >     |       |
| Insulin receptor signaling                       | >     | >     | >     | 5     |

**MBCOL3  
idarubicin**  
(is c.toxic: yes)

**MBCOL3  
amiodarone**  
(is c.toxic: nd)

**Upregulated**

**Downregulated**

**Upregulated**

**Downregulated**

**complete**

|                                                        | MSN01 | MSN05 | MSN06 | MSN08 |
|--------------------------------------------------------|-------|-------|-------|-------|
| Extrinsic apoptosis pathway                            | 1     | 1     | 2     | 4     |
| Intrinsic apoptosis pathway                            | 4     | 3     | 1     | 12    |
| Cell cycle arrest in response to DNA damage            | 3     | 2     | 4     | 24    |
| Nucleotide excision repair                             | 2     | >     | >     | 3     |
| Coagulation cascade                                    | >     | 10    | >     | 3     |
| Drug and toxin export via membrane transport proteins  | >     | 4     | >     | 17    |
| Fibrillar collagen core structure organization         | >     | >     | >     | 1     |
| Amyloid degradation, uptake and aggregation inhibition | >     | >     | >     | 2     |
| Syndecan receptor signaling                            | 5     | >     | >     |       |
| Hyaluronan receptor CD44 signaling                     | >     | >     | >     | 5     |

|                                                   | MSN01 | MSN05 | MSN06 | MSN08 |
|---------------------------------------------------|-------|-------|-------|-------|
| Z-disc organization                               | 1     | 3     | 3     | 6     |
| Thin myofilament organization                     | 2     | 4     | 4     | 5     |
| Centrosome separation                             | 5     | 7     | 2     | 3     |
| Mitotic spindle assembly                          | 23    | 11    | 7     | 4     |
| Myofibril formation                               | 5     | 15    | 20    | 8     |
| Eukaryotic kinetochore dynamics                   | >     | 1     | 1     | 1     |
| Metaphase to anaphase checkpoint                  | >     | 6     | 5     | 2     |
| Focal adhesion organization                       | 3     | 24    | 11    | >     |
| DNA replication elongation                        | >     | 2     | 6     | >     |
| Fibulin receptor signaling                        | >     | 5     | >     |       |
| Connection of muscle sarcomere to plasma membrane | 5     | >     | >     |       |

**complete**

|                                                        | MSN01 | MSN05 | MSN06 | MSN08 |    |
|--------------------------------------------------------|-------|-------|-------|-------|----|
| Cellular cholesterol uptake and efflux                 | >     | 1     | 10    | 12    | 8  |
| Serotonin inactivation                                 | >     | 12    | 11    | 16    | 11 |
| Fibrillar collagen core structure organization         | >     | 3     | 1     | 1     | 4  |
| Amyloid degradation, uptake and aggregation inhibition | >     | 3     | 13    | 2     | 4  |
| Semaphorin signaling                                   | >     | 3     | 13    | 7     |    |
| ECM breakdown & membrane shedding by adamalysins       | >     | 1     | 7     | 4     |    |
| Alternative complement pathway                         | >     | 8     | 4     | 3     |    |
| Adenosine receptor signaling                           | >     | 8     | 3     | 3     |    |
| Metaphase to anaphase checkpoint                       | >     | >     | >     | 3     |    |
| Sister chromatid segregation                           | >     | >     | >     | 2     |    |
| Osteonectin receptor signaling                         | >     | >     | 2     | >     |    |
| Lipogenesis                                            | 2     | >     | >     | >     |    |
| CCN family receptor signaling                          | >     | >     | 4     | >     |    |
| Thyroid hormone receptor signaling                     | >     | >     | 4     | >     |    |
| Leptin receptor signaling                              | 4     | >     | >     | >     |    |
| Centrosome separation                                  | >     | >     | >     | 4     |    |
| Endogenous control of complement activity              | >     | >     | 5     | >     |    |

|                                                           | MSN01 | MSN05 | MSN06 | MSN08 |
|-----------------------------------------------------------|-------|-------|-------|-------|
| Z-disc organization                                       | 6     | 2     | 1     | 2     |
| Natriuretic peptide receptor signaling                    | 6     | 14    | 6     | 3     |
| CCN family receptor signaling                             | 3     | 12    | 3     | 6     |
| Thin myofilament organization                             | 7     | 10    | 9     | 4     |
| Collagen fibril organization by fibril-associated bridges | 5     | 8     | 6     | 1     |
| Glycolysis and Gluconeogenesis                            | >     | 2     | >     | 1     |
| Glycogen synthesis and glycogenolysis                     | >     | 5     | >     | 4     |
| Connection of muscle sarcomere to plasma membrane         | 10    | >     | >     | 10    |
| Restriction point                                         | >     | 10    | >     | 5     |
| GM-CSF receptor signaling                                 | 1     | >     | 15    |       |
| Fibrillar collagen core structure organization            | >     | 1     | >     |       |
| Recycling endosome dynamics                               | >     | 2     | >     |       |
| Lectin complement pathway                                 | >     | 3     | >     |       |
| Fibronectin synthesis and extracellular assembly          | >     | 3     | >     |       |
| Contractile ring constriction                             | >     | 3     | >     |       |
| WNT-Beta-catenin signaling pathway                        | >     | 4     | >     |       |
| Thrombospondin receptor signaling                         | >     | 4     | >     |       |

**no1stSVD**

|                                                        | MSN01 | MSN05 | MSN06 | MSN08 |
|--------------------------------------------------------|-------|-------|-------|-------|
| Extrinsic apoptosis pathway                            | 1     | 7     | 1     |       |
| Amyloid degradation, uptake and aggregation inhibition | 4     | >     | 3     |       |
| RNA editing                                            | 12    | 3     | 2     |       |
| Cell cycle arrest in response to DNA damage            | 10    | 4     | 5     |       |
| Intrinsic apoptosis pathway                            | 5     | 12    | 6     |       |
| ECM breakdown by matrix metalloproteases               | 2     | 2     | >     | 31    |
| Nucleotide excision repair                             | 3     | >     | 4     | 32    |
| Coagulation cascade                                    | >     | 9     | >     | 2     |
| Fibrillar collagen core structure organization         | 12    | >     | >     | 1     |
| Drug and toxin export via membrane transport proteins  | >     | 1     | >     | 21    |
| Selectin-mediated Leukocyte rolling                    | >     | >     | >     | 4     |
| Microfibril scaffold organization                      | >     | >     | >     | 5     |

|                                                  | MSN01 | MSN05 | MSN06 | MSN08 |
|--------------------------------------------------|-------|-------|-------|-------|
| Mitotic spindle assembly                         | 10    | 7     | 5     | 3     |
| Contractile ring constriction                    | 2     | 9     | 9     | 6     |
| Centrosome separation                            | >     | 4     | 1     | 2     |
| Eukaryotic kinetochore dynamics                  | >     | 3     | 2     | 4     |
| Metaphase to anaphase checkpoint                 | >     | 8     | 3     | 1     |
| ECM breakdown & membrane shedding by adamalysins | 5     | 1     | 13    | >     |
| DNA replication elongation                       | >     | 2     | 4     | 22    |
| DNA replication initiation                       | >     | 5     | 6     | >     |
| Thin myofilament organization                    | 1     | >     | >     | 16    |
| Z-disc organization                              | 3     | >     | >     | 22    |
| Focal adhesion organization                      | 4     | >     | >     |       |

**no1stSVD**

|                                                        | MSN01 | MSN05 | MSN06 | MSN08 |    |
|--------------------------------------------------------|-------|-------|-------|-------|----|
| Cellular cholesterol uptake and efflux                 | >     | 1     | 11    | 12    | 10 |
| Serotonin inactivation                                 | >     | 12    | 11    | 16    | 12 |
| Fibrillar collagen core structure organization         | >     | 5     | 1     | 1     | 6  |
| Alternative complement pathway                         | >     | 5     | 4     | 3     |    |
| Amyloid degradation, uptake and aggregation inhibition | >     | 2     | >     | 4     |    |
| ECM breakdown & membrane shedding by adamalysins       | >     | 1     | >     | 4     |    |
| Adenosine receptor signaling                           | &gt   |       |       |       |    |

MBCOL3  
dobutamine  
(is c.toxic: nd)

MBCOL3  
flecainide  
(is c.toxic: nd)

Upregulated

Downregulated

Upregulated

Downregulated

complete

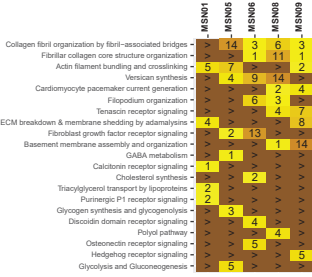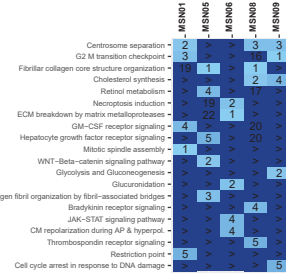

complete

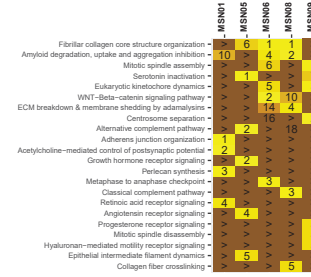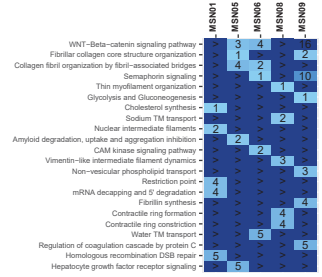

no1stSD

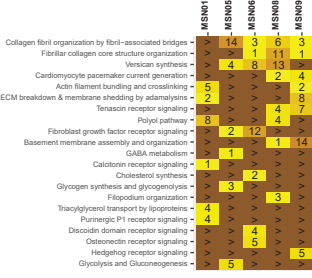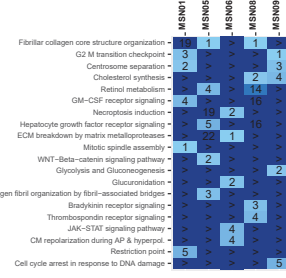

no1stSD

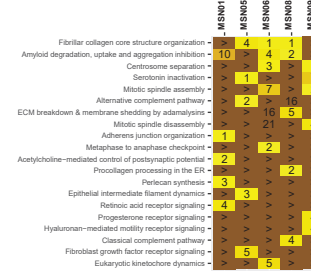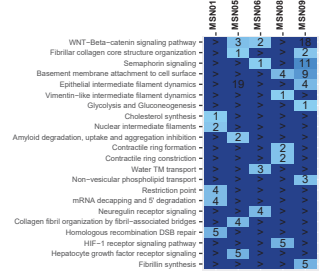

decomposed

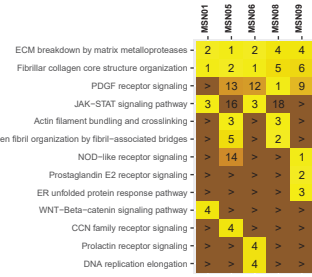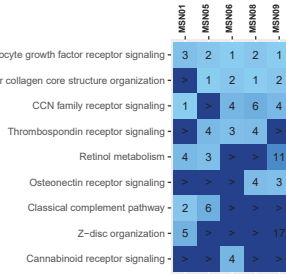

decomposed

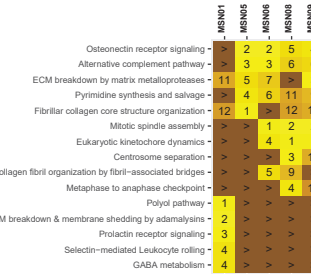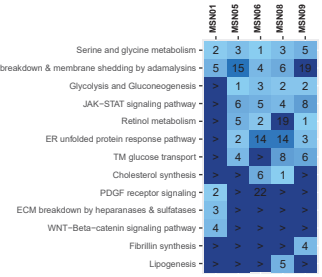

MBCOL3  
isoprenaline  
(is c.toxic: nd)

MBCOL3  
milrinone  
(is c.toxic: nd)

Upregulated

Downregulated

Upregulated

Downregulated

complete

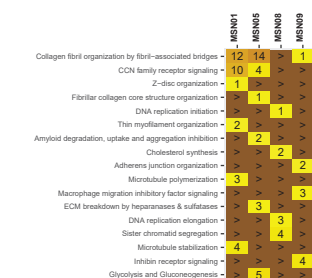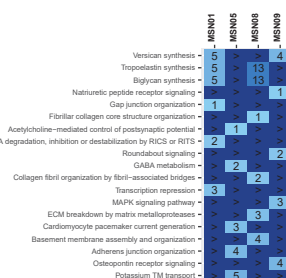

complete

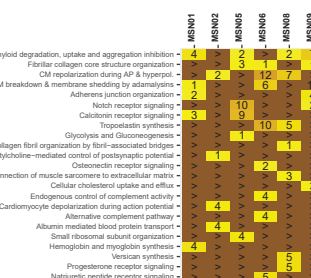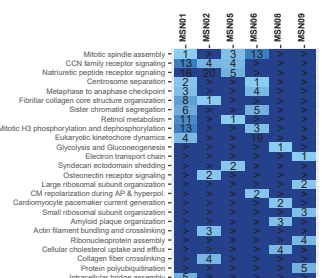

no1stSD

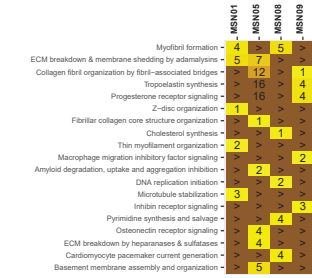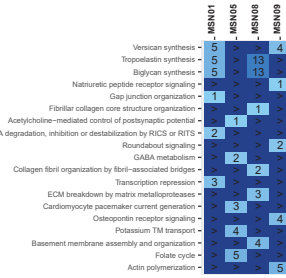

no1stSD

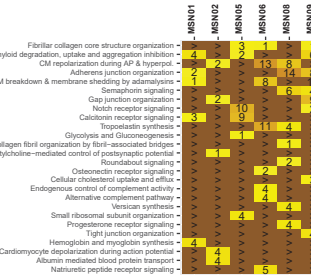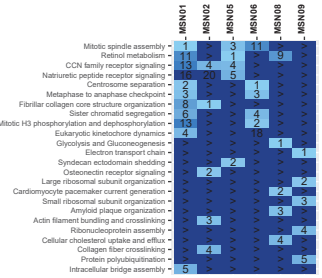

decomposed

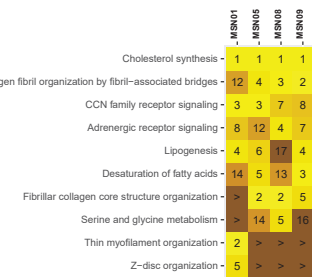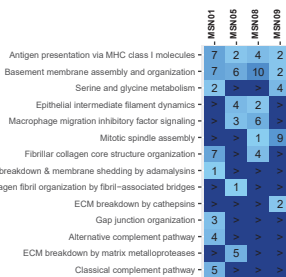

decomposed

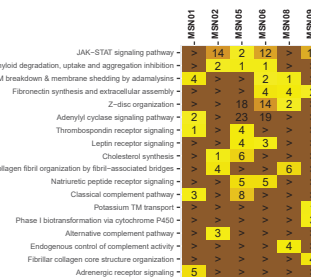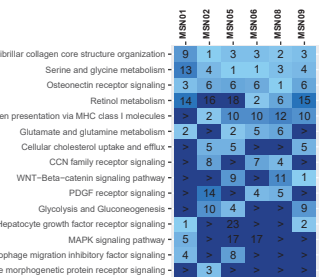

**MBCOL3  
phenylephrine  
(is c.toxic: nd)**

**MBCOL3  
verapamil  
(is c.toxic: nd)**

**Upregulated**

**Downregulated**

**Upregulated**

**Downregulated**

complete

complete

no1stSVD

no1stSVD

decomposed

decomposed

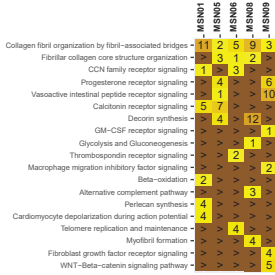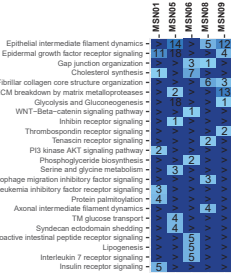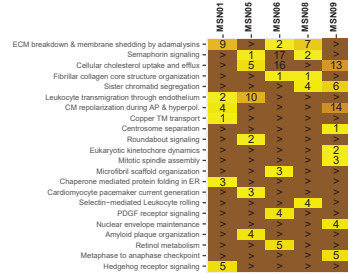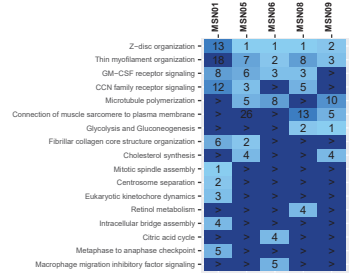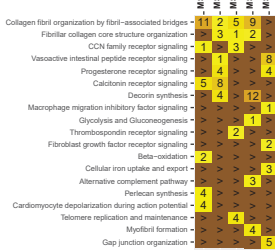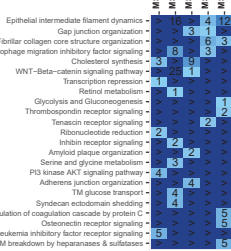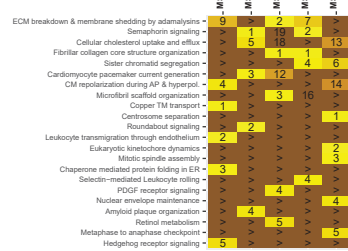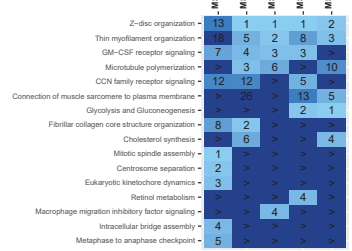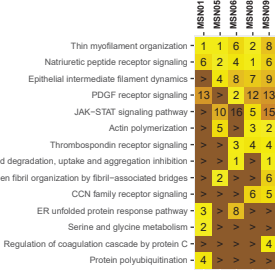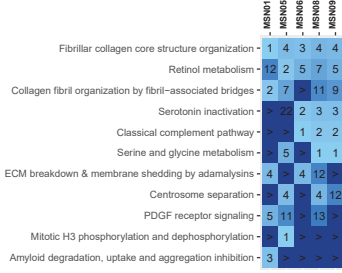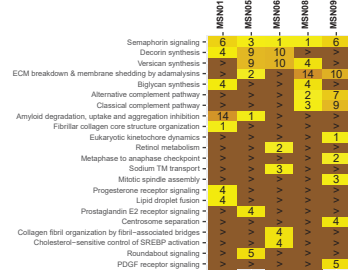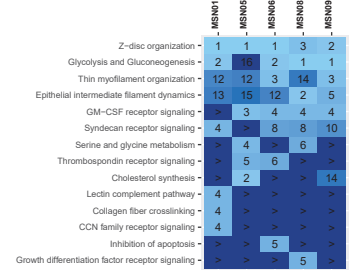

**MBCOL3  
azacitidine  
(is c.toxic: nd)**

**MBCOL3  
bortezomib  
(is c.toxic: yes)**

**Upregulated**

**Downregulated**

**Upregulated**

**Downregulated**

complete

complete

no1stSVD

no1stSVD

decomposed

decomposed

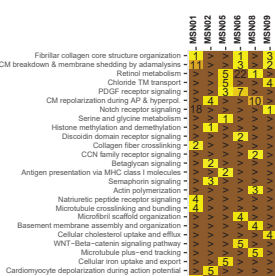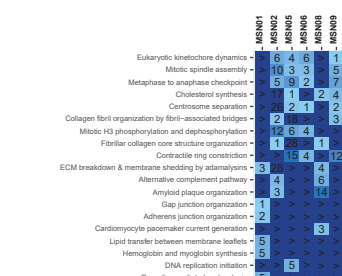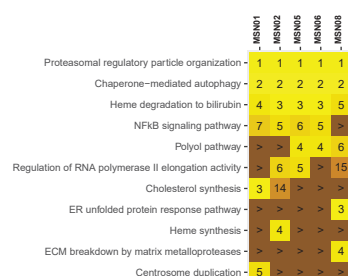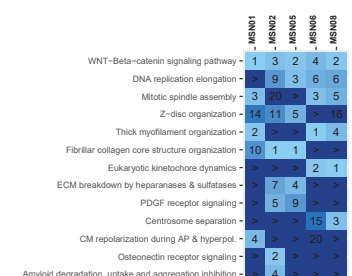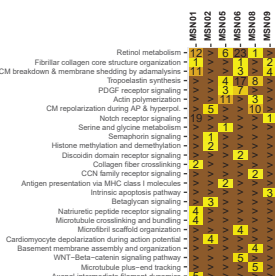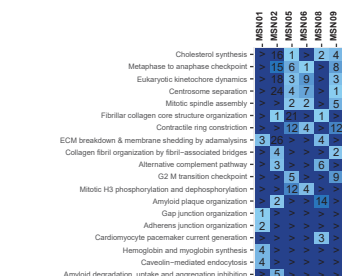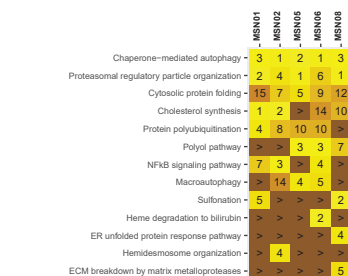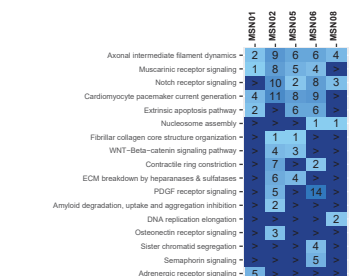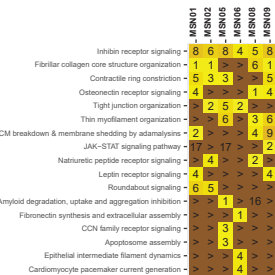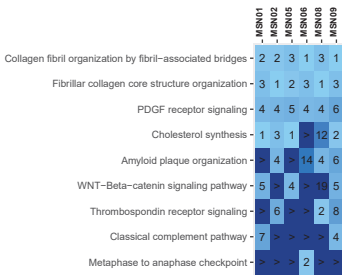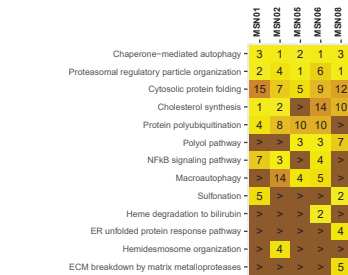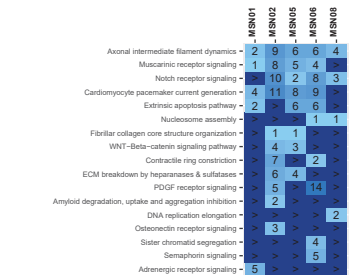

**MBCOL3  
carfilzomib  
(is c.toxic: yes)**

**MBCOL3  
cyclosporine  
(is c.toxic: nd)**

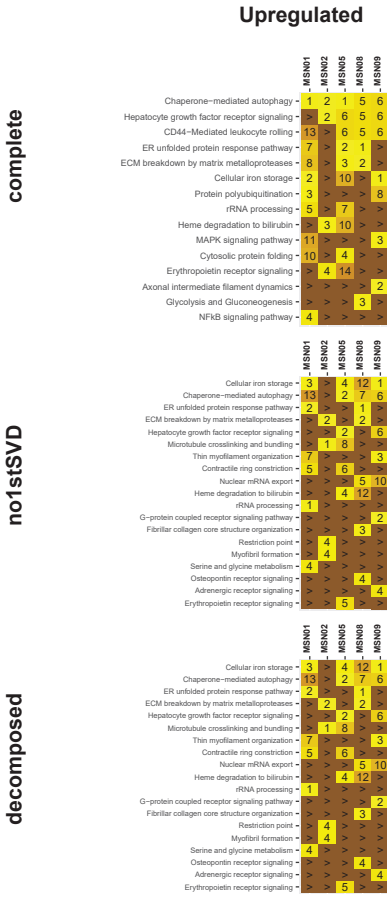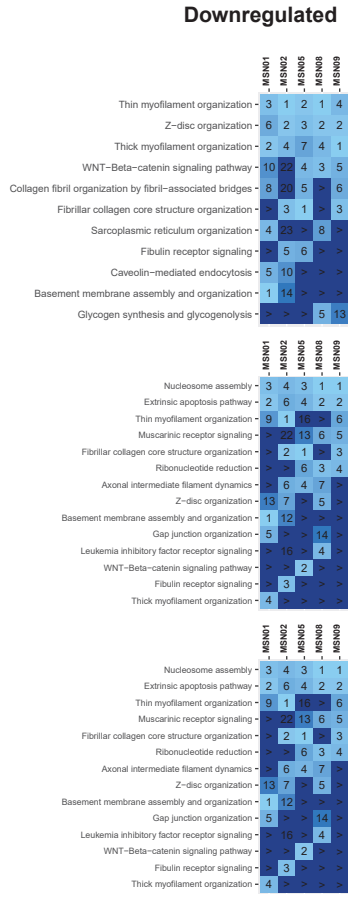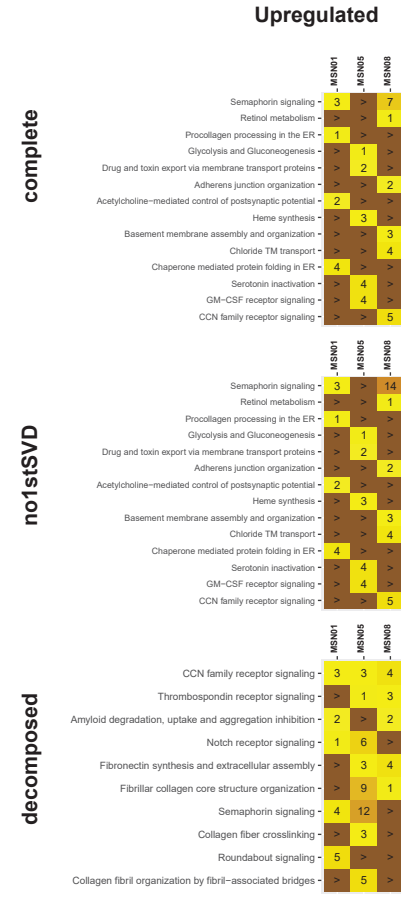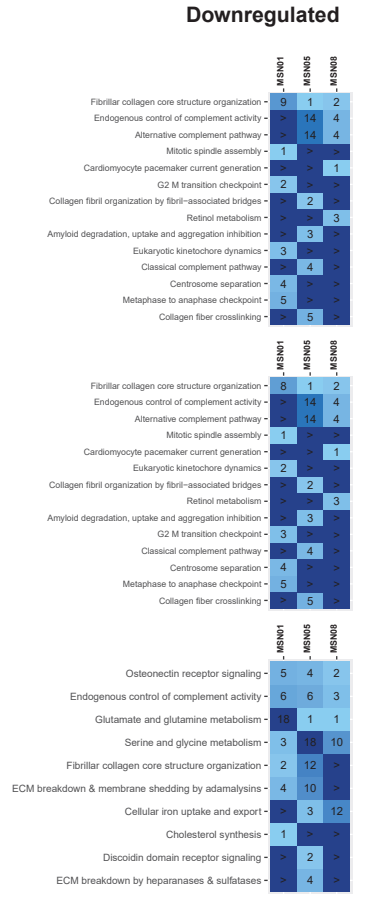

**MBCOL3  
decitabine  
(is c.toxic: nd)**

**MBCOL3  
delavirdine  
(is c.toxic: nd)**

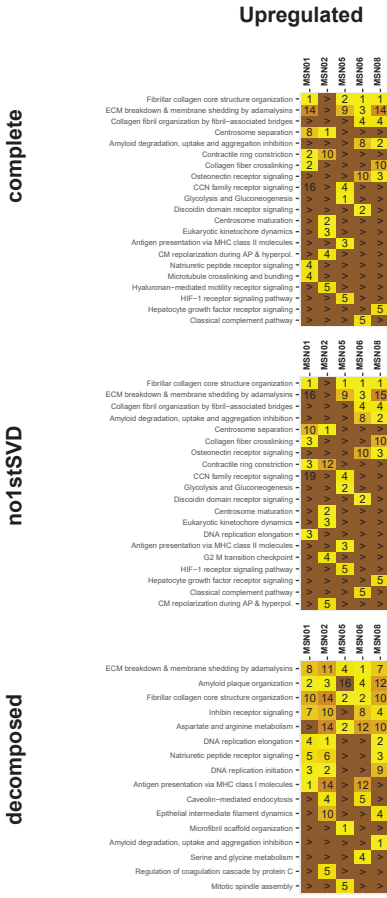



**MBCOL3  
diclofenac  
(is c.toxic: nd)**

**MBCOL3  
endothelin-1  
(is c.toxic: nd)**

Upregulated

Downregulated

Upregulated

Downregulated

complete

complete

no1stSD

decomposed

no1stSD

decomposed

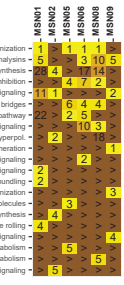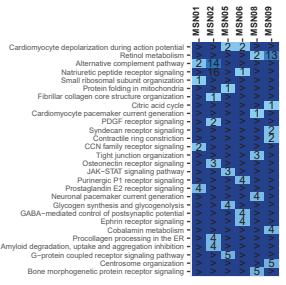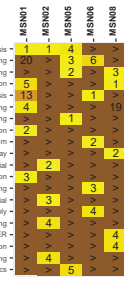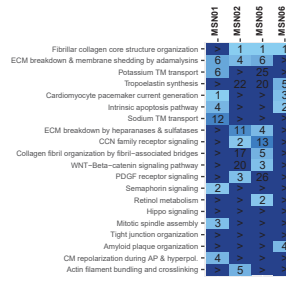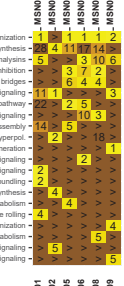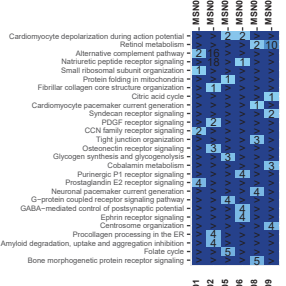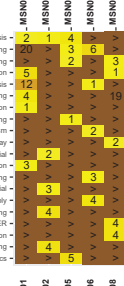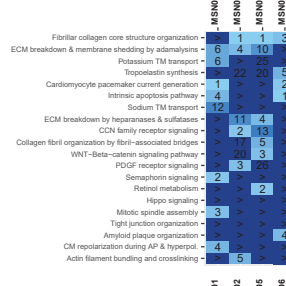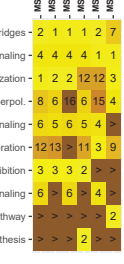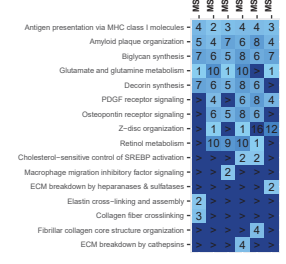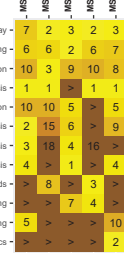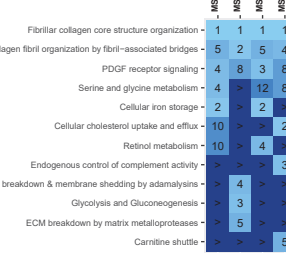

**MBCOL3  
estradiol  
(is c.toxic: nd)**

**MBCOL3  
insulin-like growth factor 1  
(is c.toxic: nd)**

Upregulated

Downregulated

Upregulated

Downregulated

complete

complete

no1stSD

decomposed

no1stSD

decomposed

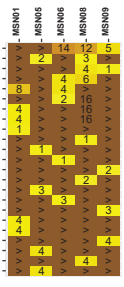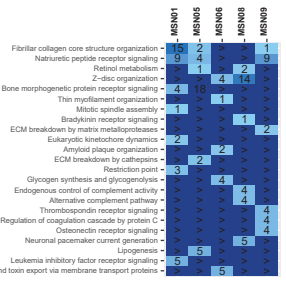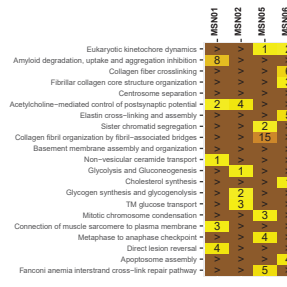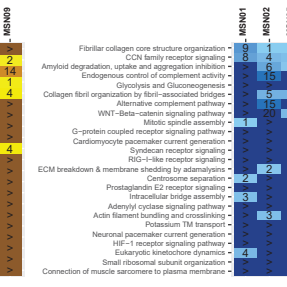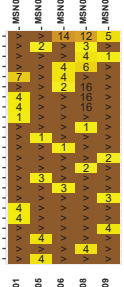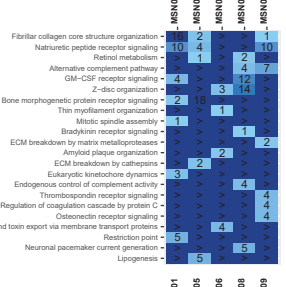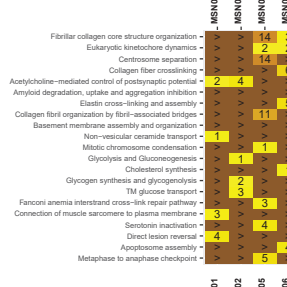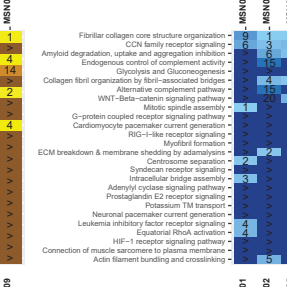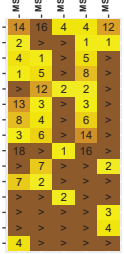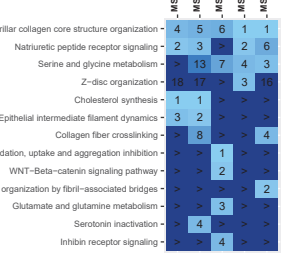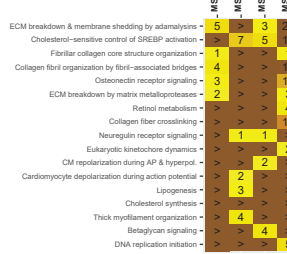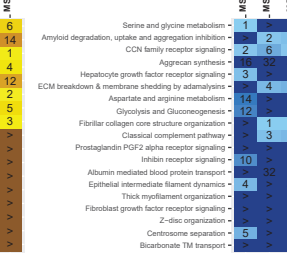

**MBCOL3**  
**olmesartan**  
(is c.toxic: nd)

**MBCOL3**  
**pioglitazone**  
(is c.toxic: nd)

**Upregulated**

**Downregulated**

**Upregulated**

**Downregulated**

complete

complete

no1stSVD

no1stSVD

decomposed

decomposed

complete

complete

no1stSVD

no1stSVD

decomposed

decomposed

**Upregulated**

**Downregulated**

**Upregulated**

**Downregulated**

**complete**

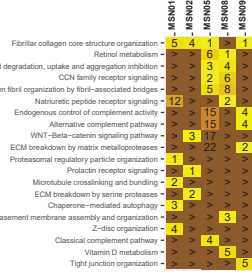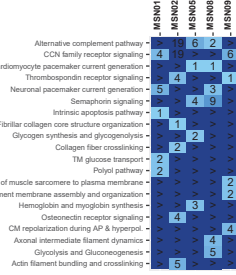

**complete**

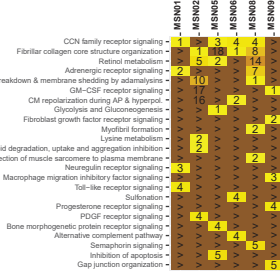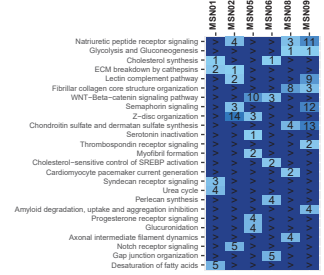

**no1stSVD**

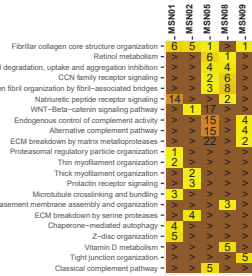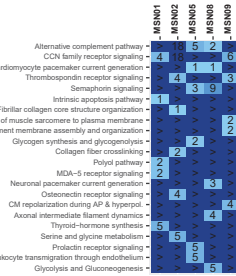

**no1stSVD**

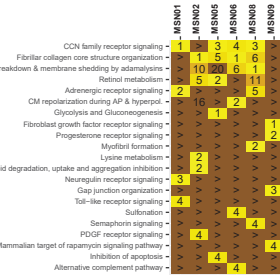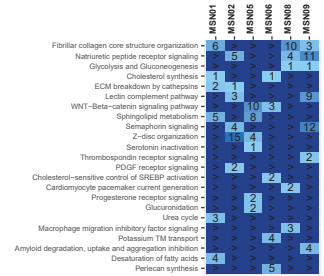

**decomposed**

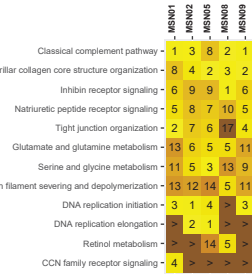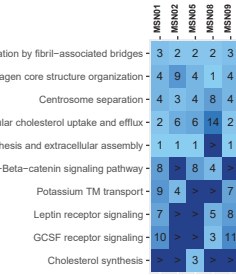

**decomposed**

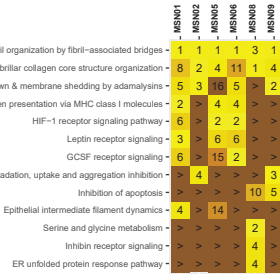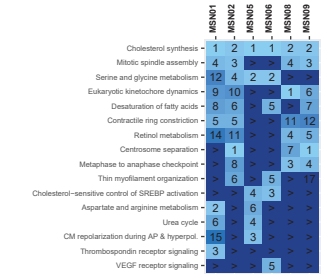

**MBCOL4  
afatinib**  
(is c.toxic: no)

**MBCOL4  
axitinib**  
(is c.toxic: no)

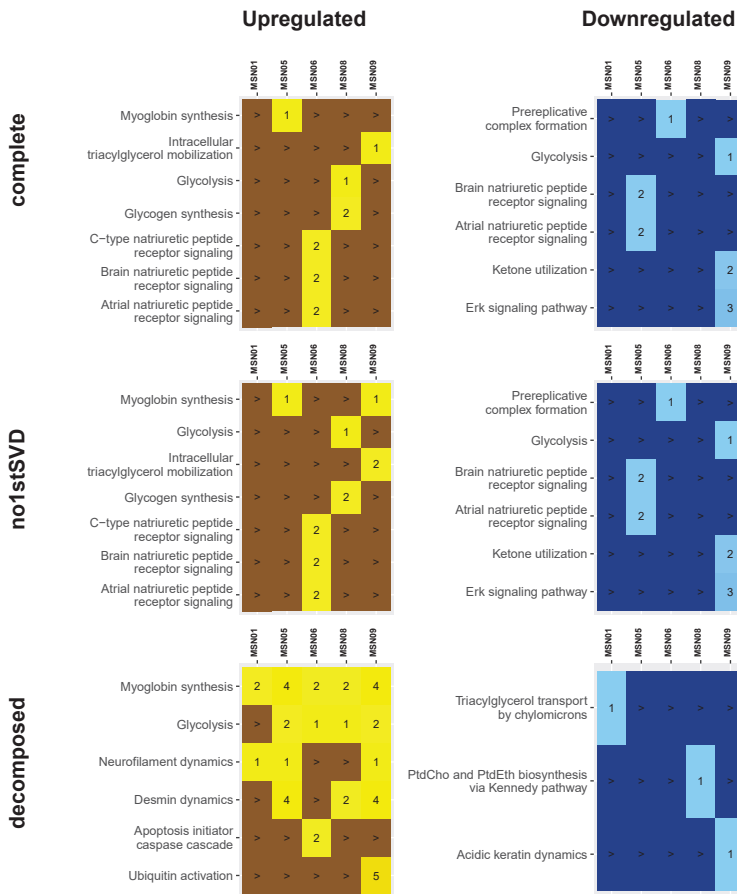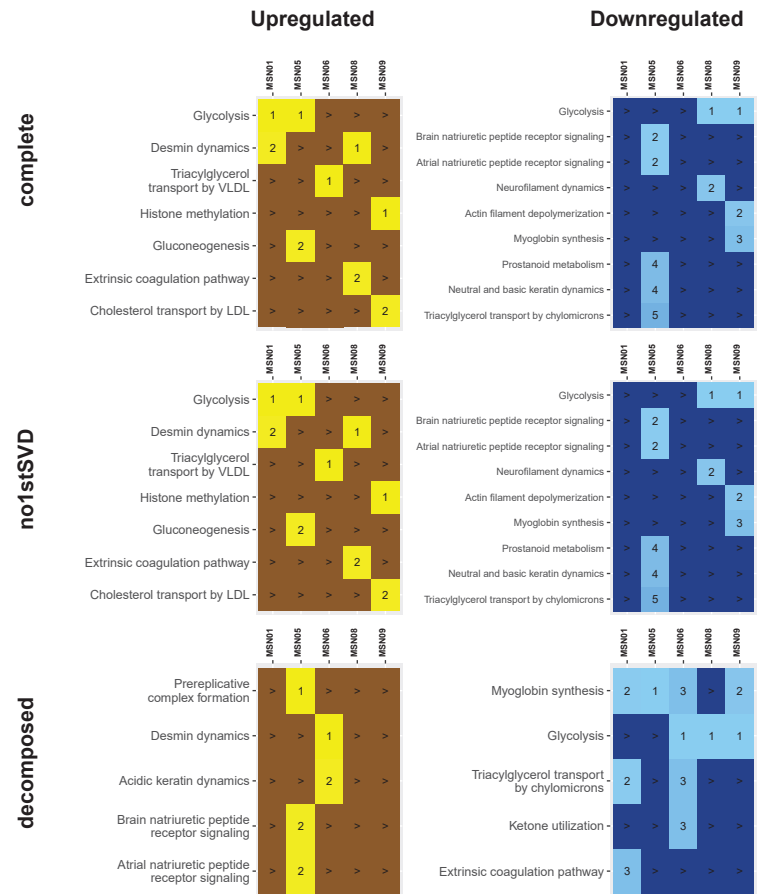

**MBCOL4  
bosutinib**  
(is c.toxic: no)

**MBCOL4  
cabozantinib**  
(is c.toxic: no)

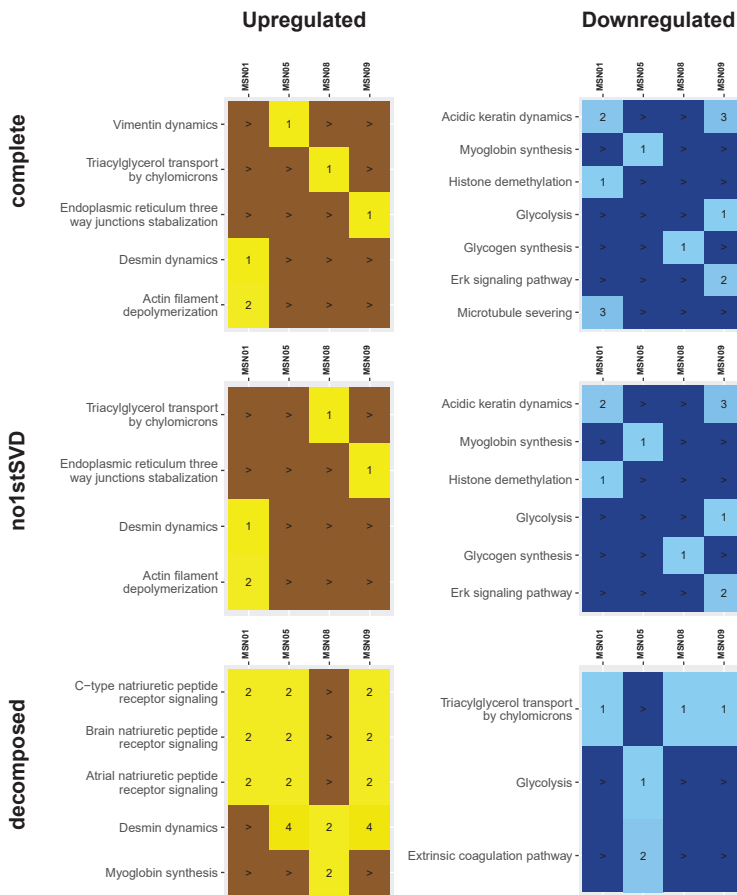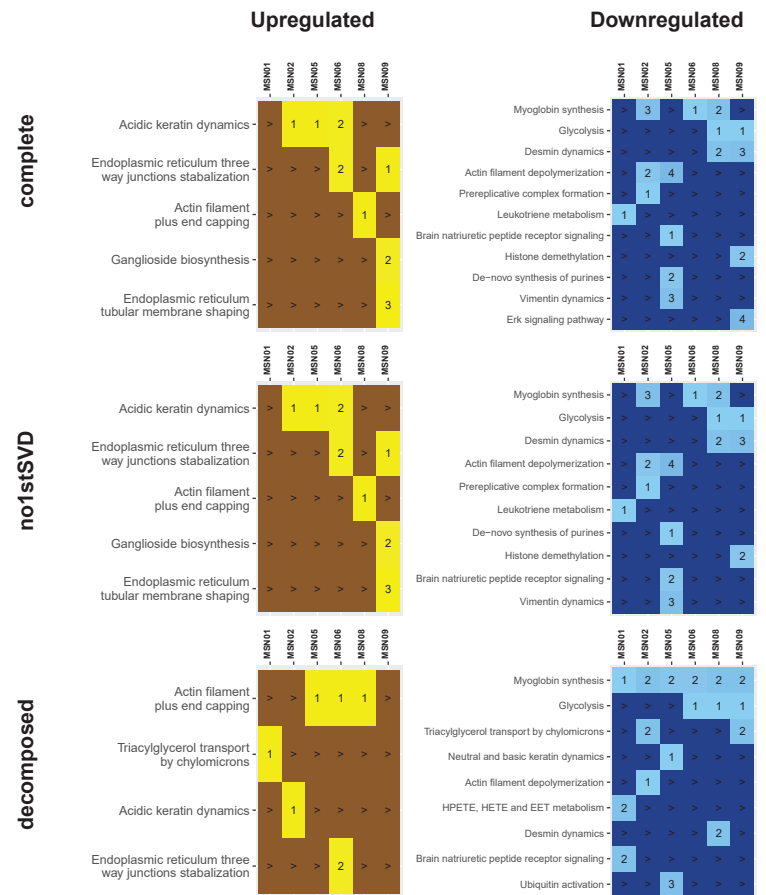

**MBCOL4  
ceritinib**  
(is c.toxic: no)

**MBCOL4  
crizotinib**  
(is c.toxic: no)

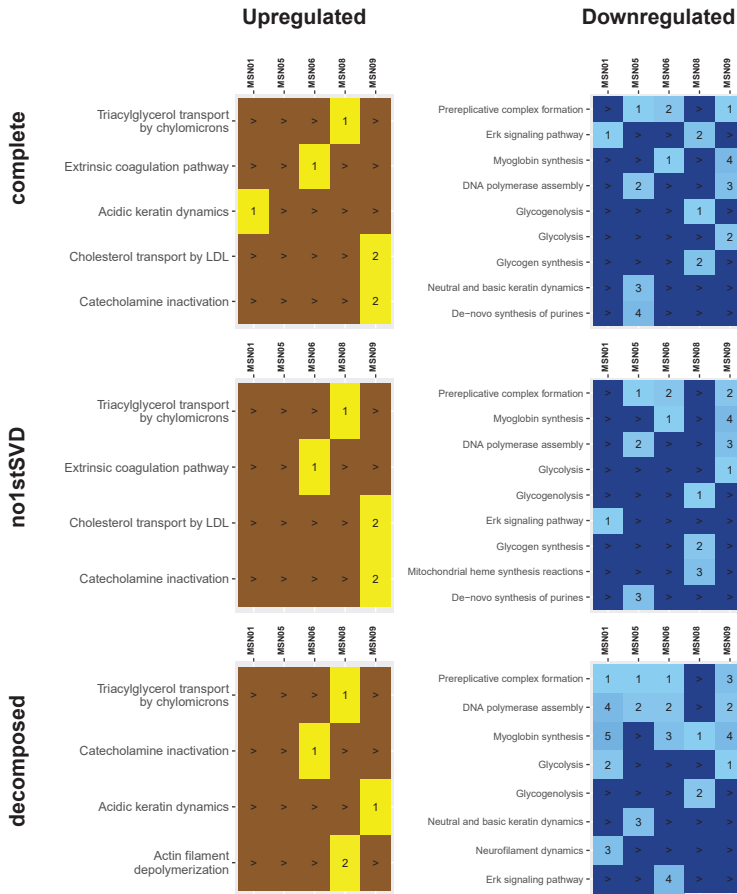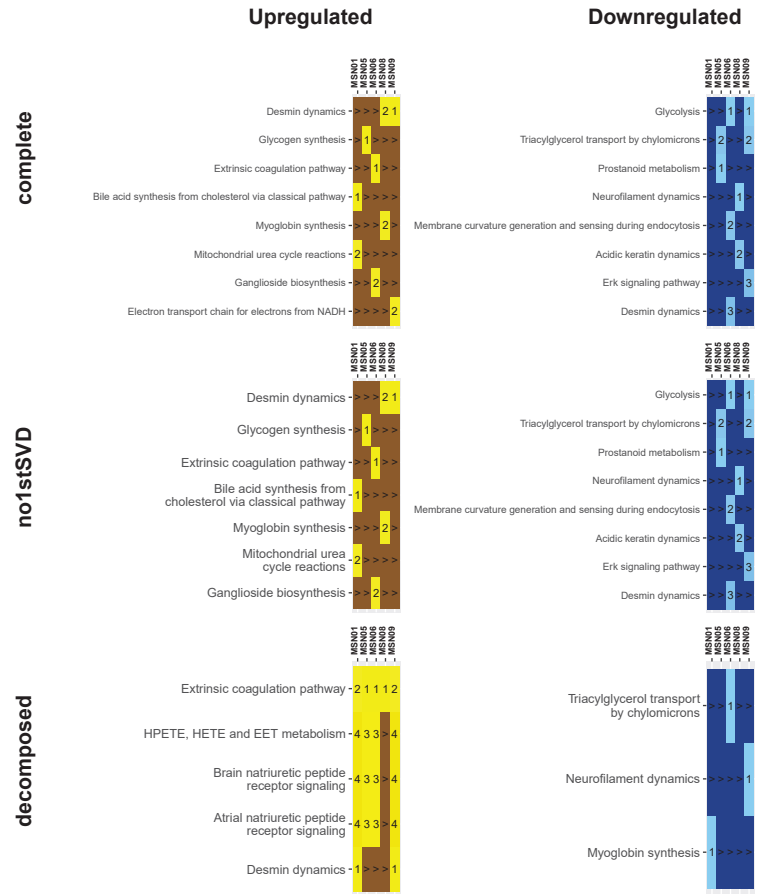

**MBCOL4  
dabrafenib**  
(is c.toxic: yes)

**MBCOL4  
dasatinib**  
(is c.toxic: no)

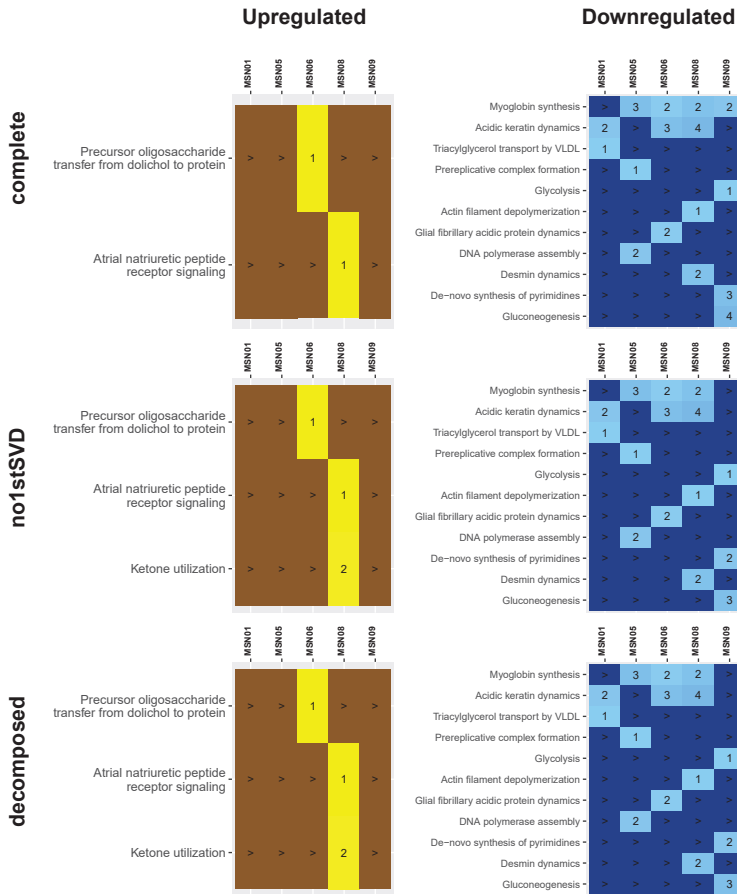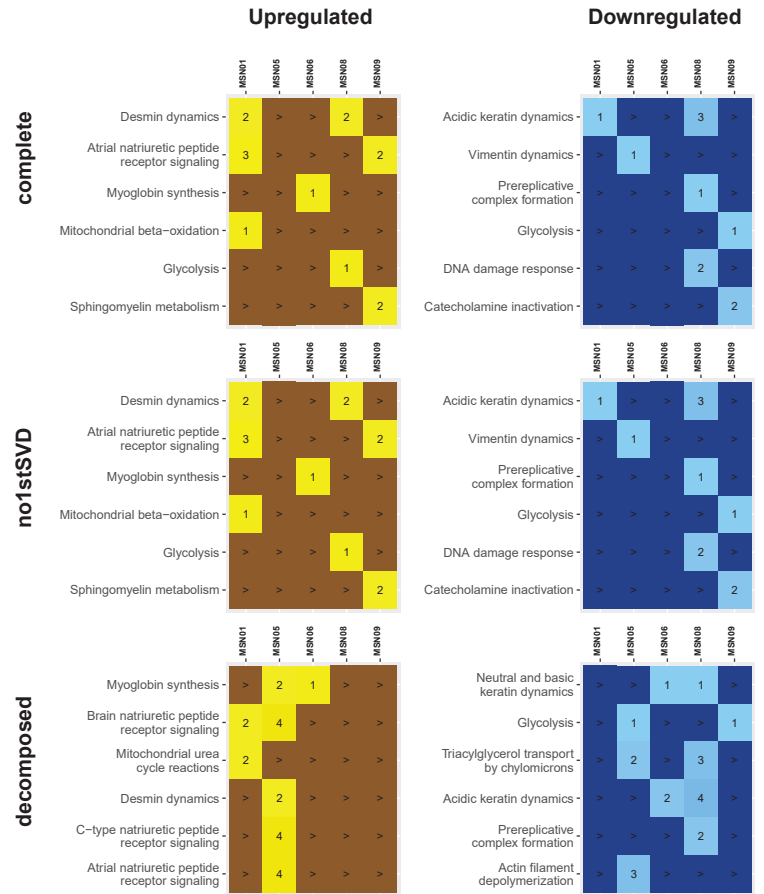

**MBCOL4  
erlotinib**  
(is c.toxic: no)

**MBCOL4  
gefitinib**  
(is c.toxic: no)

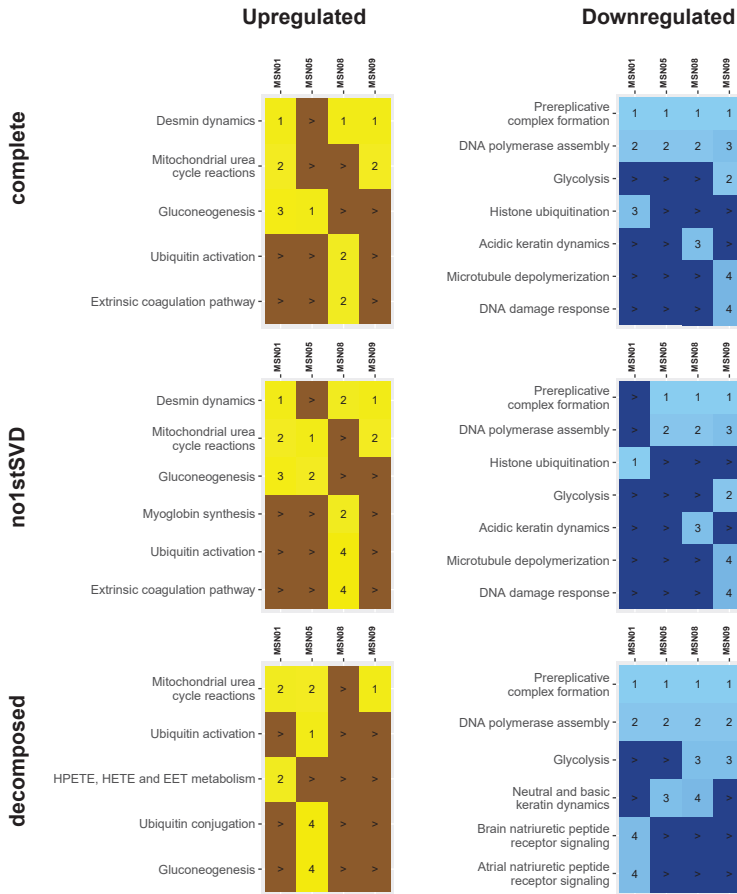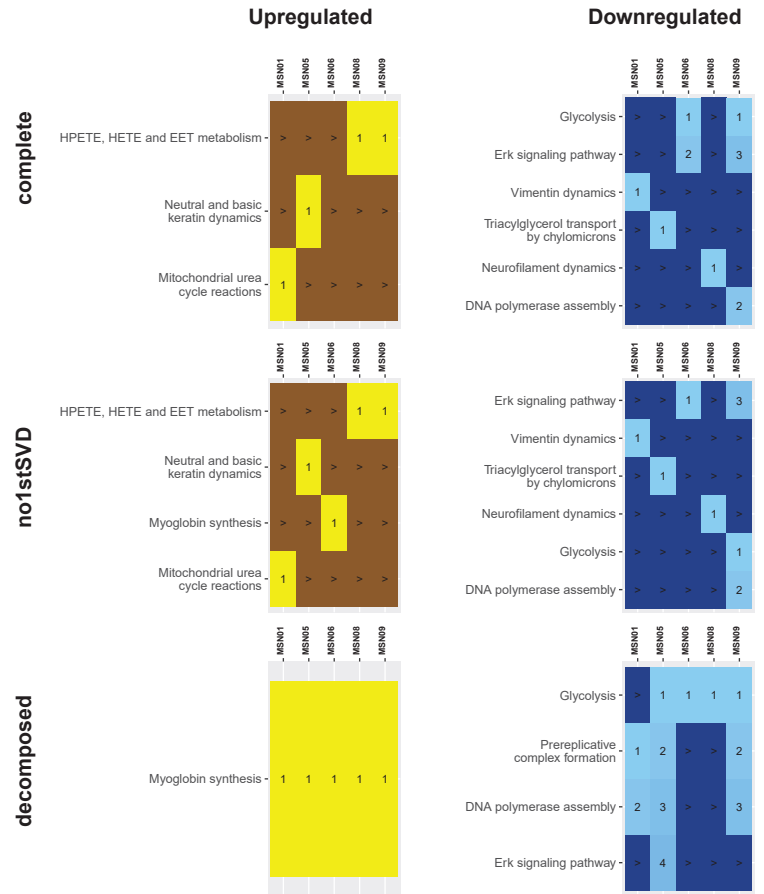

**MBCOL4  
imatinib**  
(is c.toxic: no)

**MBCOL4  
lapatinib**  
(is c.toxic: yes)

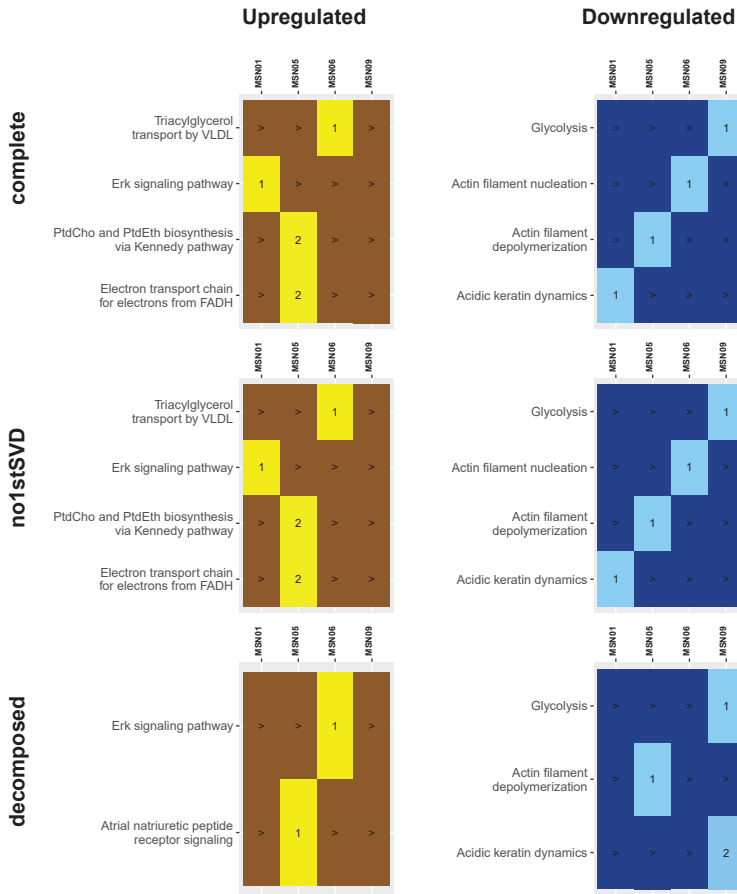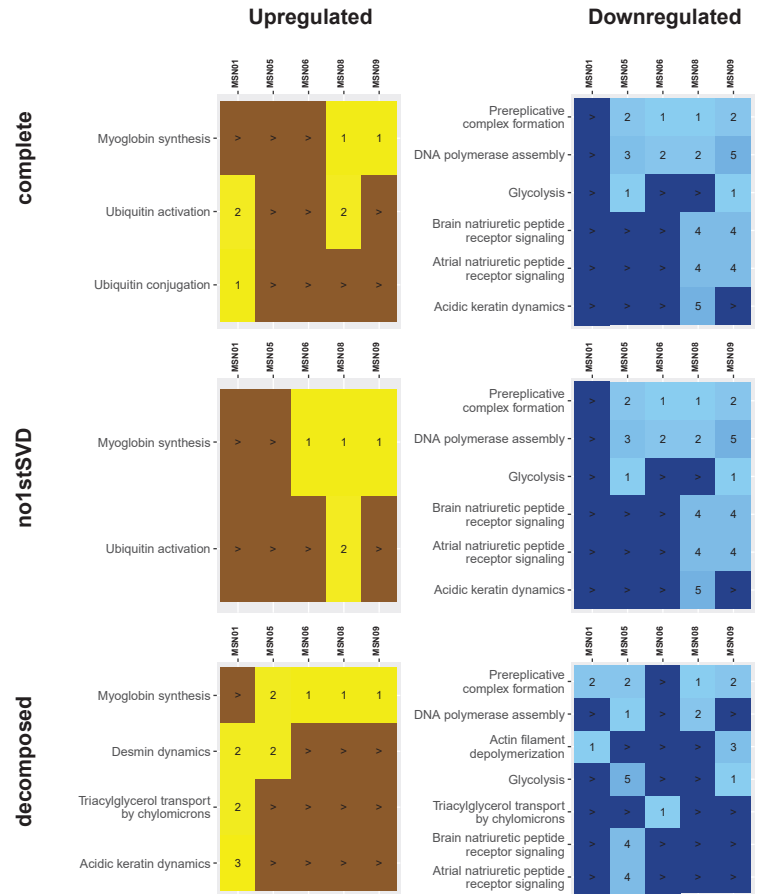

**MBCOL4  
nilotinib**  
(is c.toxic: no)

**MBCOL4  
pazopanib**  
(is c.toxic: yes)

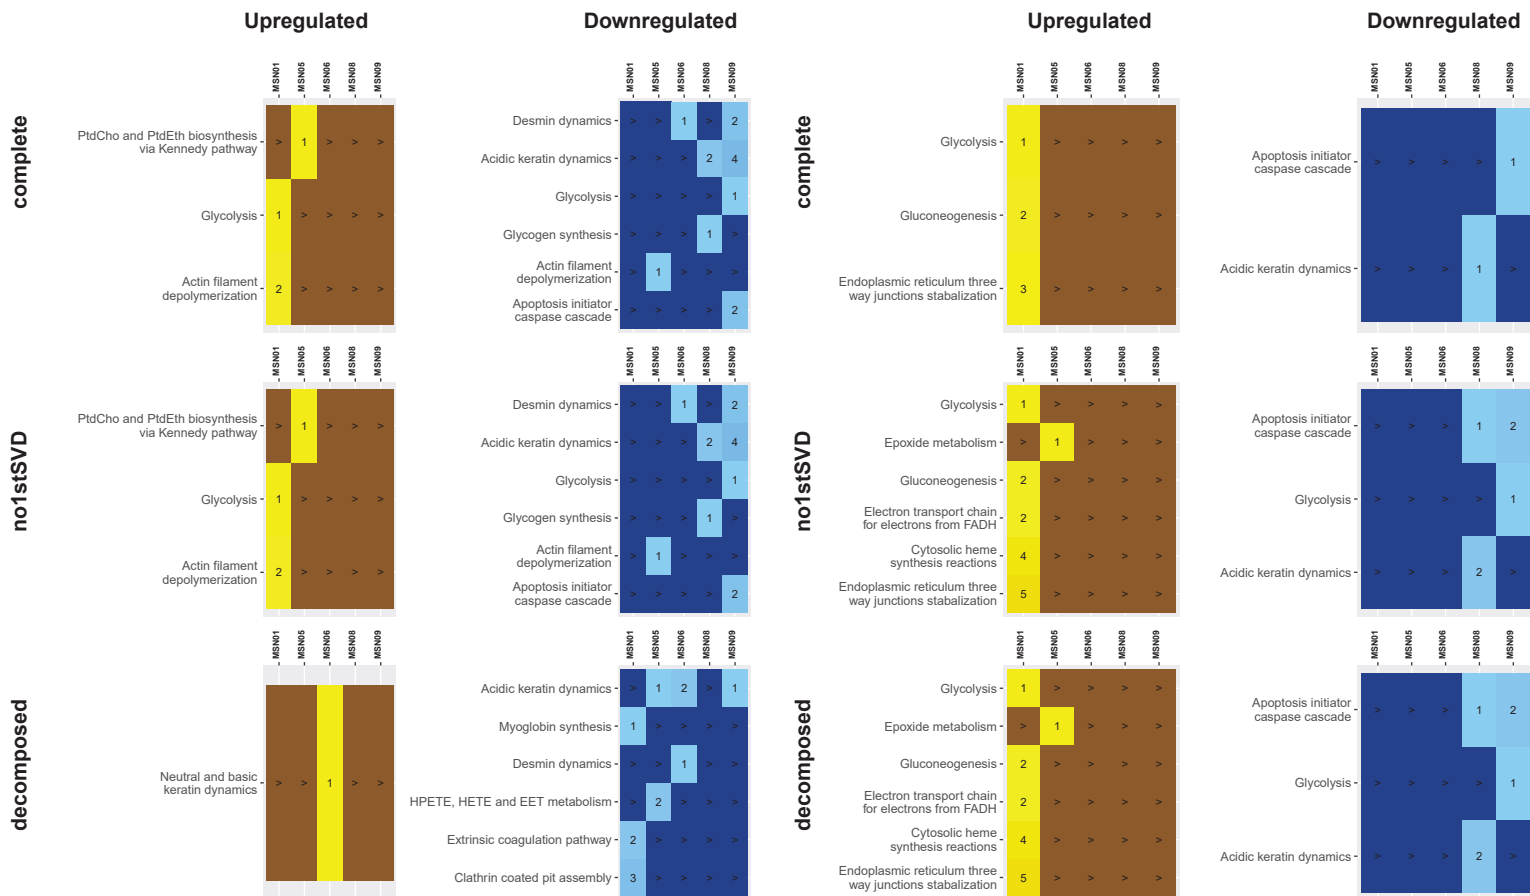

**MBCOL4  
ponatinib**  
(is c.toxic: yes)

**MBCOL4  
regorafenib**  
(is c.toxic: no)

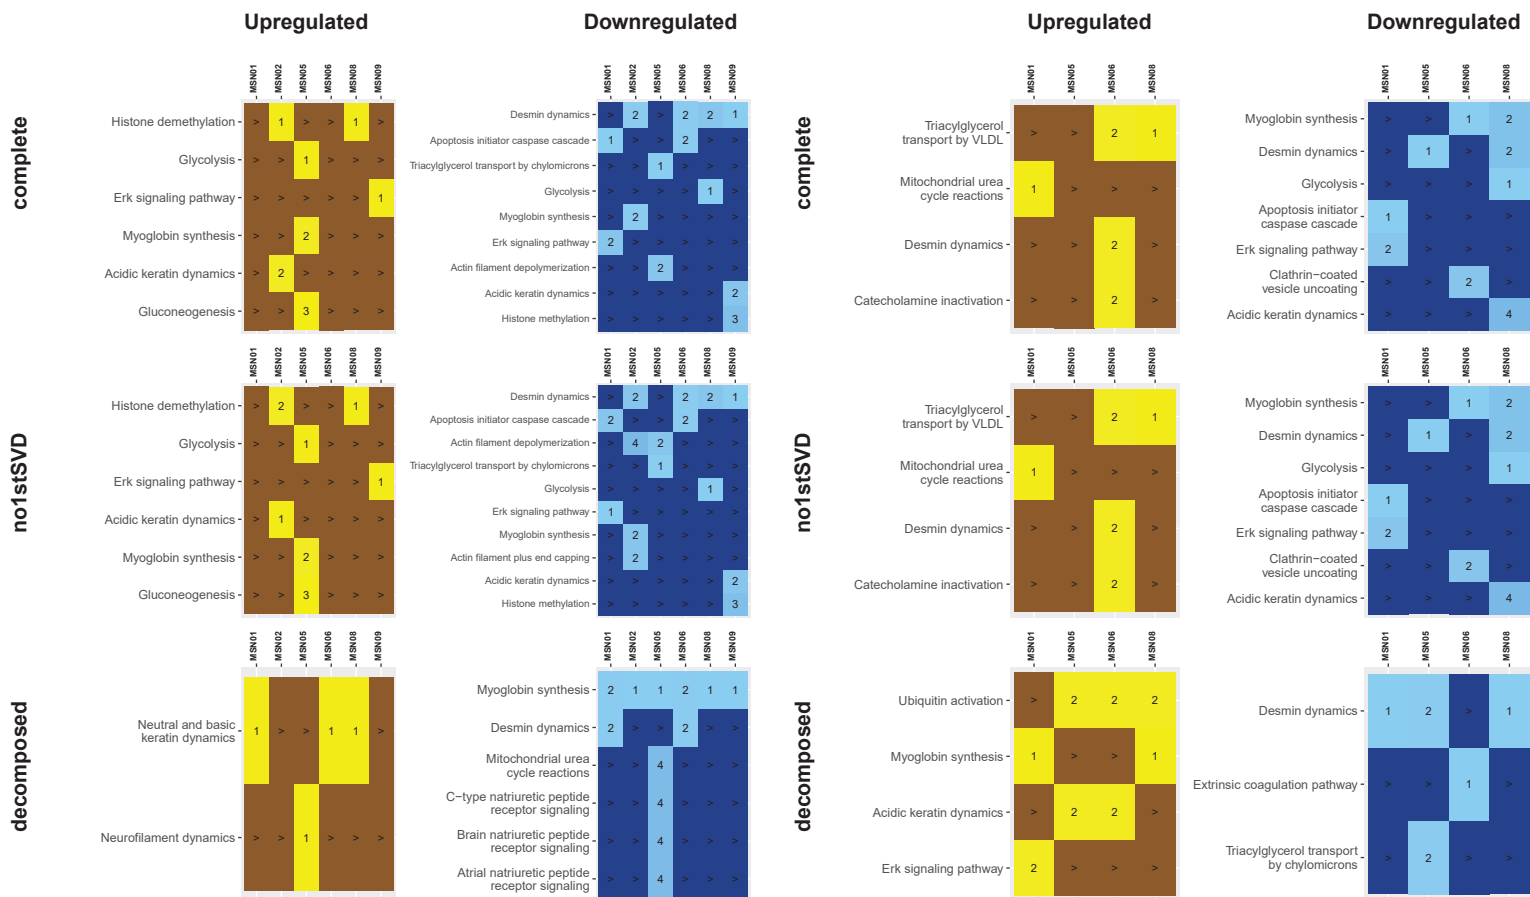

**MBCOL4  
ruxolitinib**  
(is c.toxic: no)

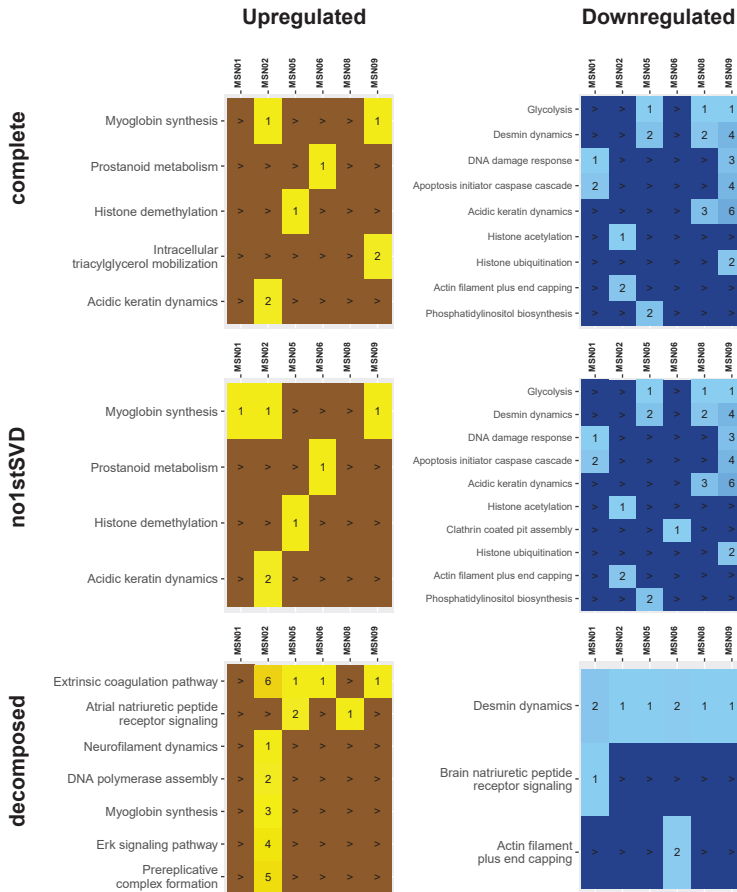

**MBCOL4  
sorafenib**  
(is c.toxic: yes)

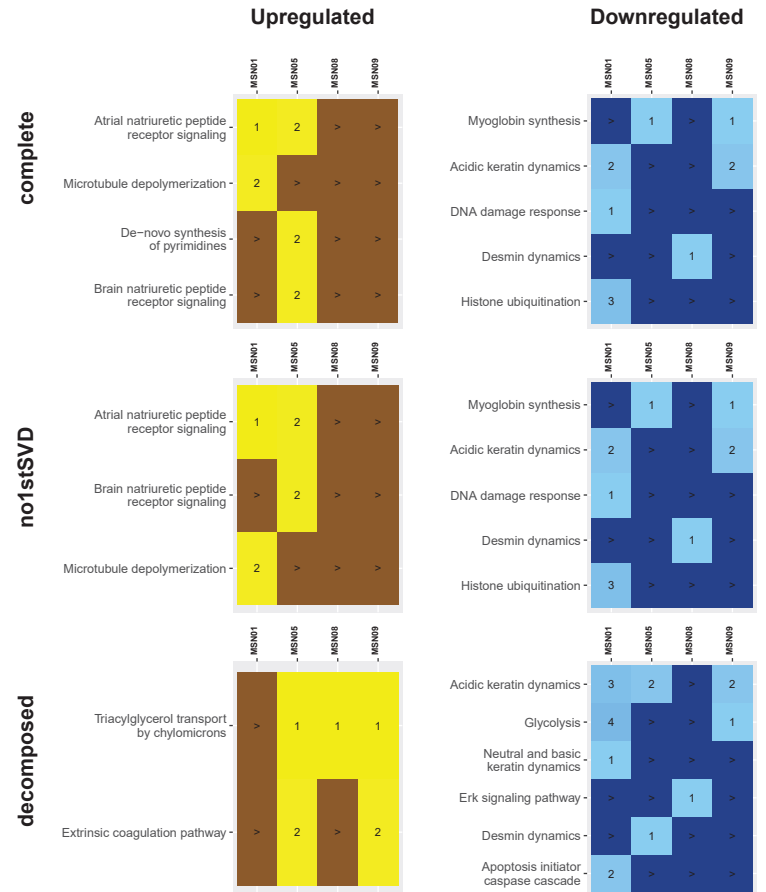

**MBCOL4  
sunitinib**  
(is c.toxic: yes)

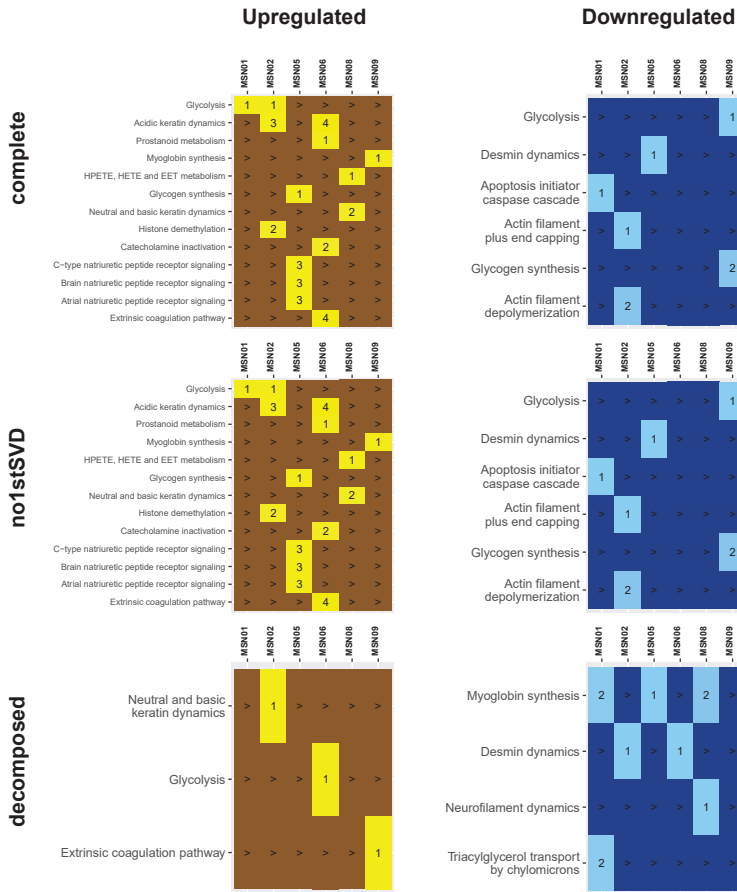

**MBCOL4  
tofacitinib**  
(is c.toxic: no)

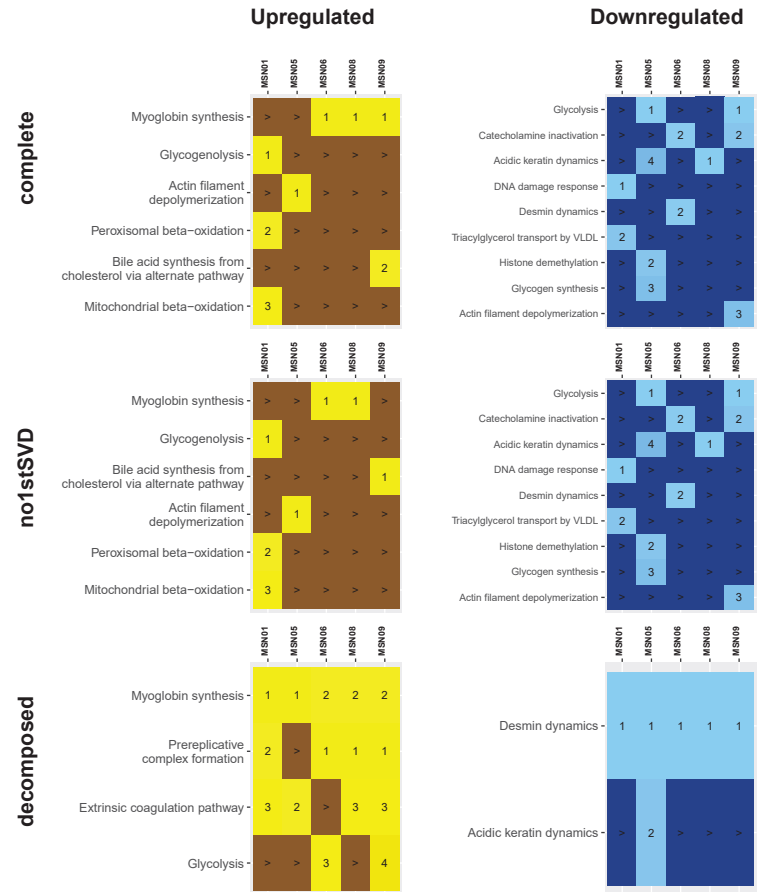



**MBCOL4  
trametinib**  
(is c.toxic: yes)

**MBCOL4  
vandetanib**  
(is c.toxic: yes)

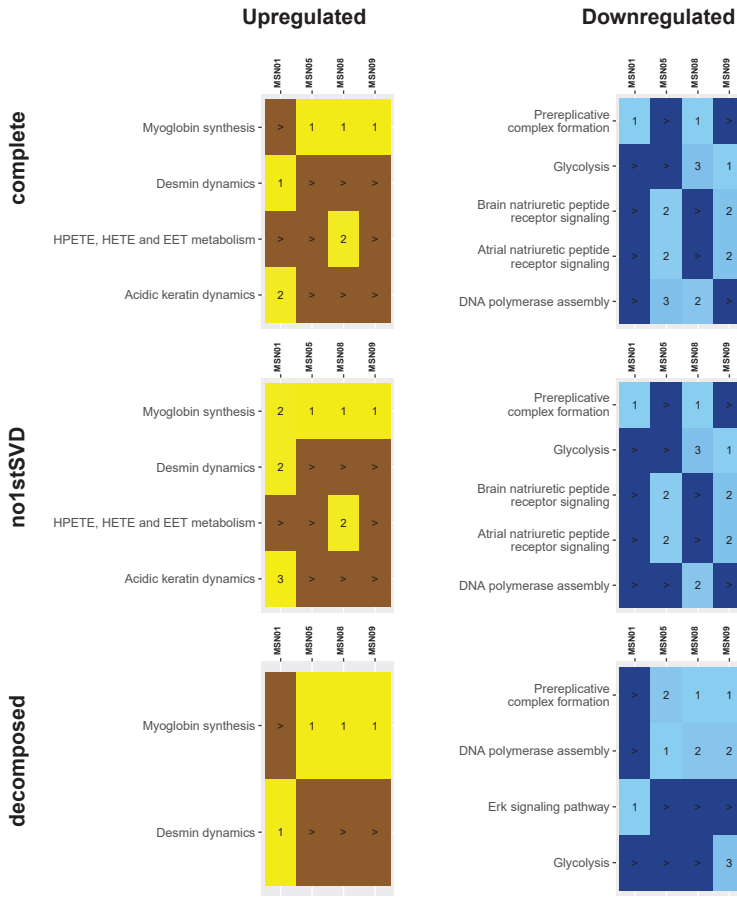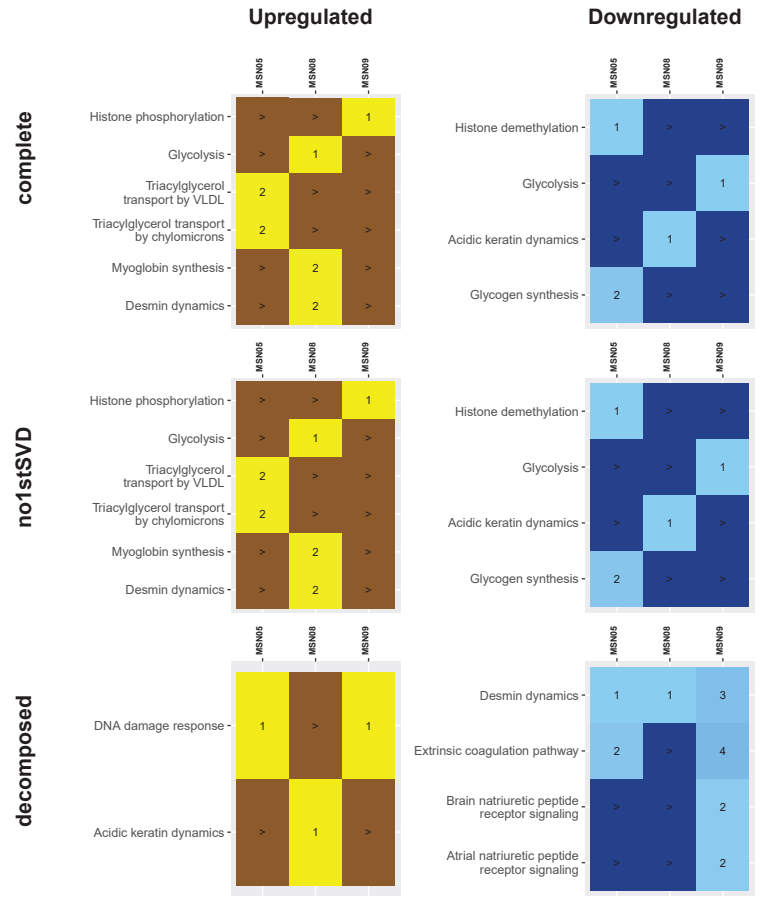

**MBCOL4  
vemurafenib**  
(is c.toxic: no)

**MBCOL4  
bevacizumab**  
(is c.toxic: yes)

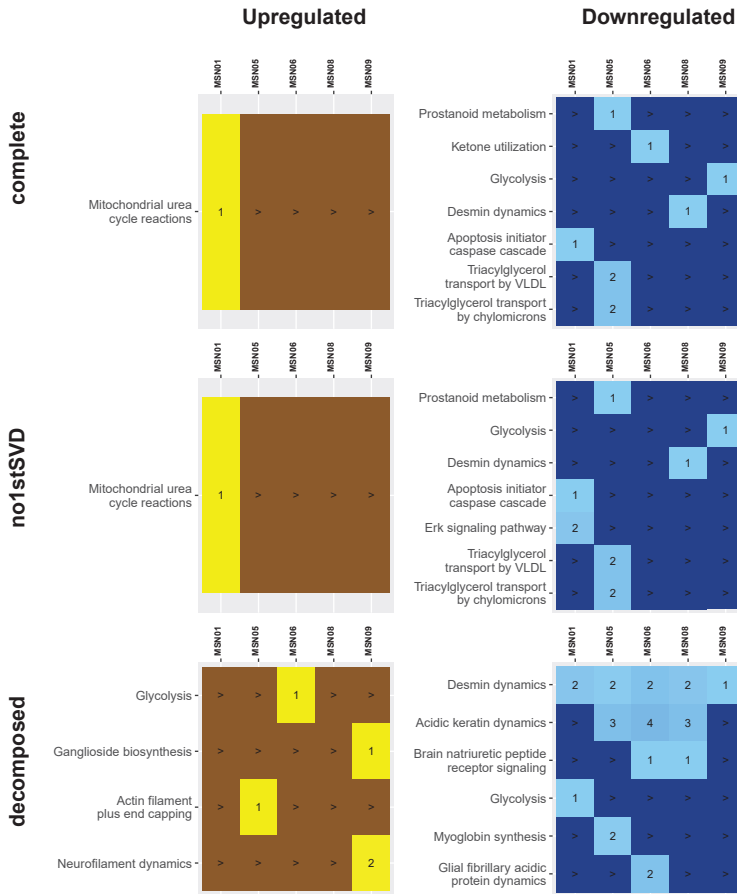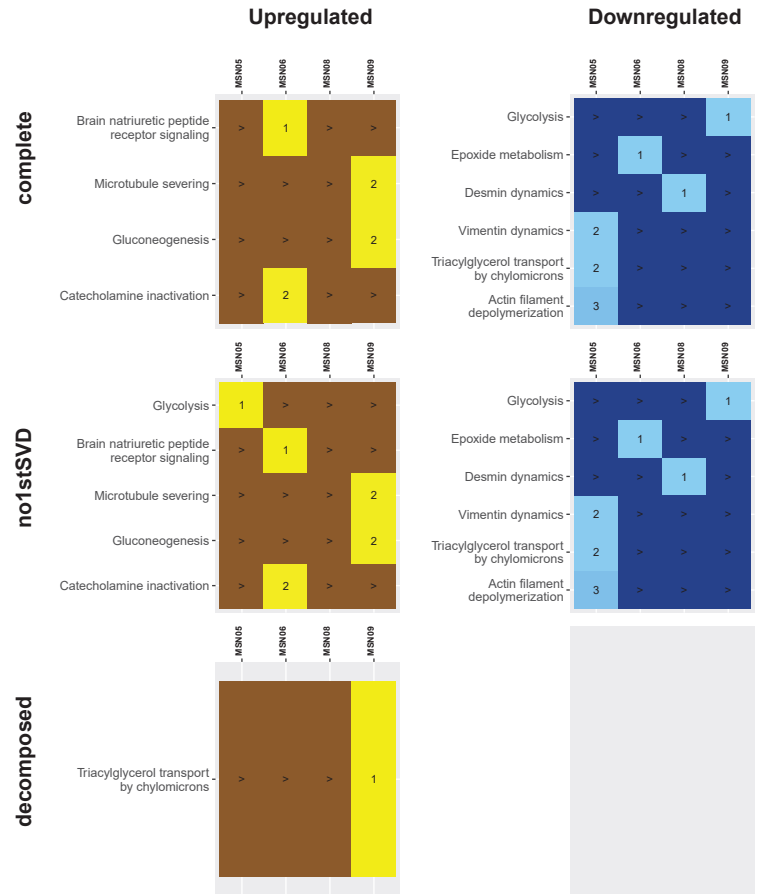

**MBCOL4  
cetuximab  
(is c.toxic: no)**

**MBCOL4  
rituximab  
(is c.toxic: no)**

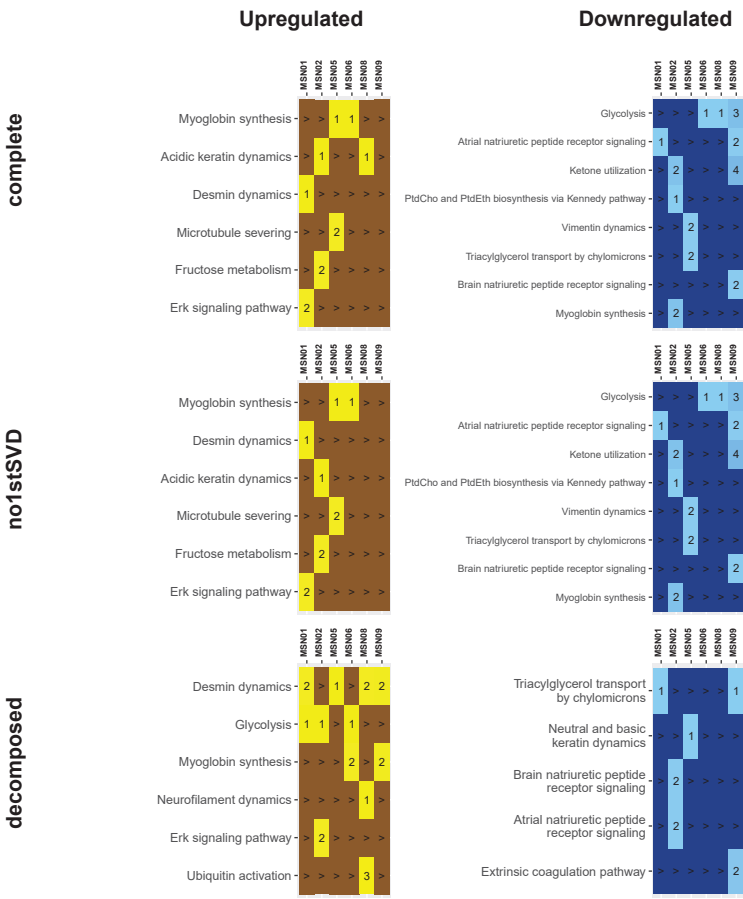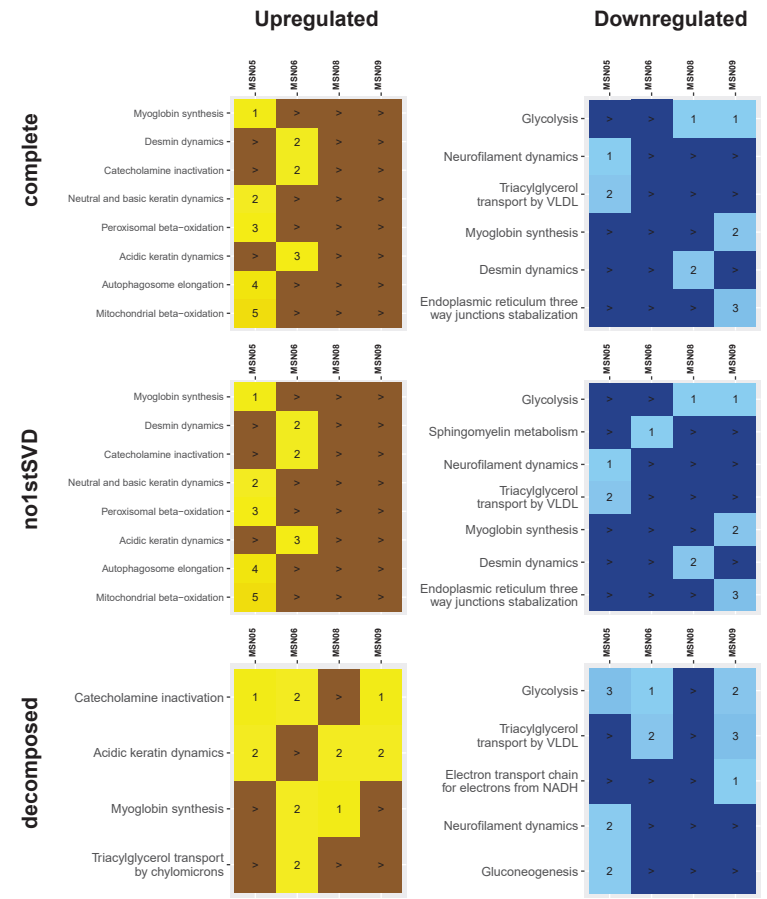

**MBCOL4  
trastuzumab  
(is c.toxic: yes)**

**MBCOL4  
daunorubicin  
(is c.toxic: yes)**

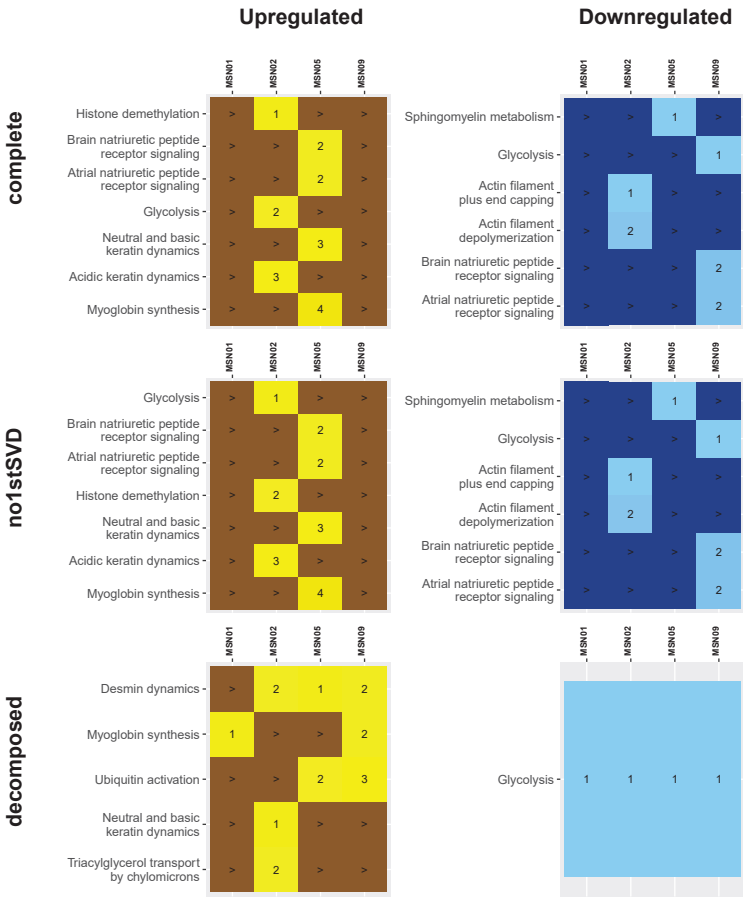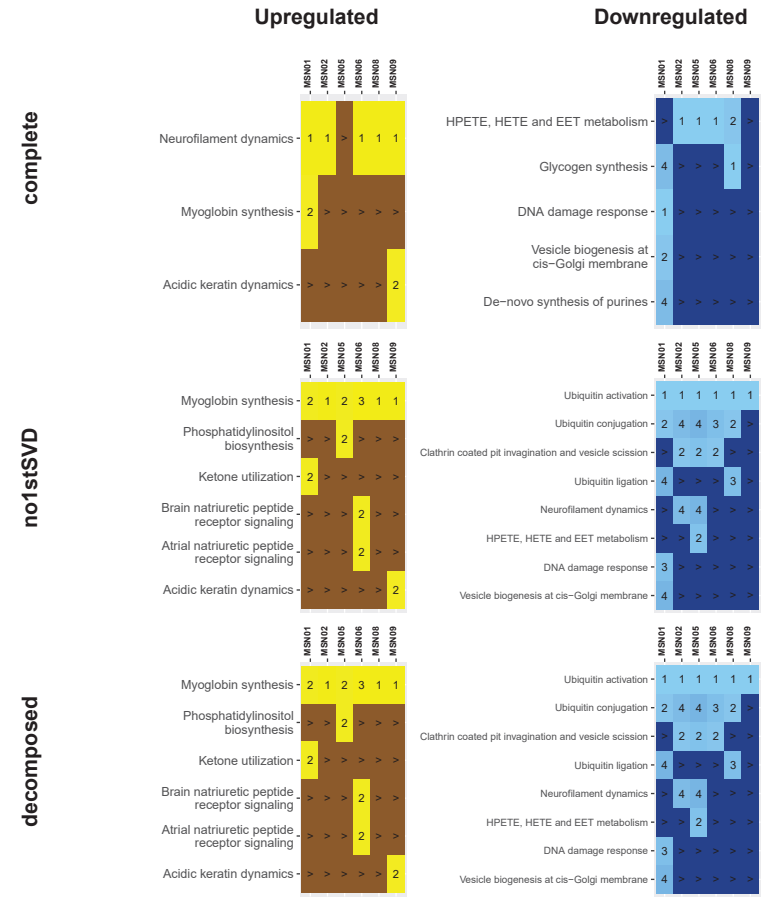

**MBCOL4  
doxorubicin**  
(is c.toxic: yes)

**MBCOL4  
epirubicin**  
(is c.toxic: yes)

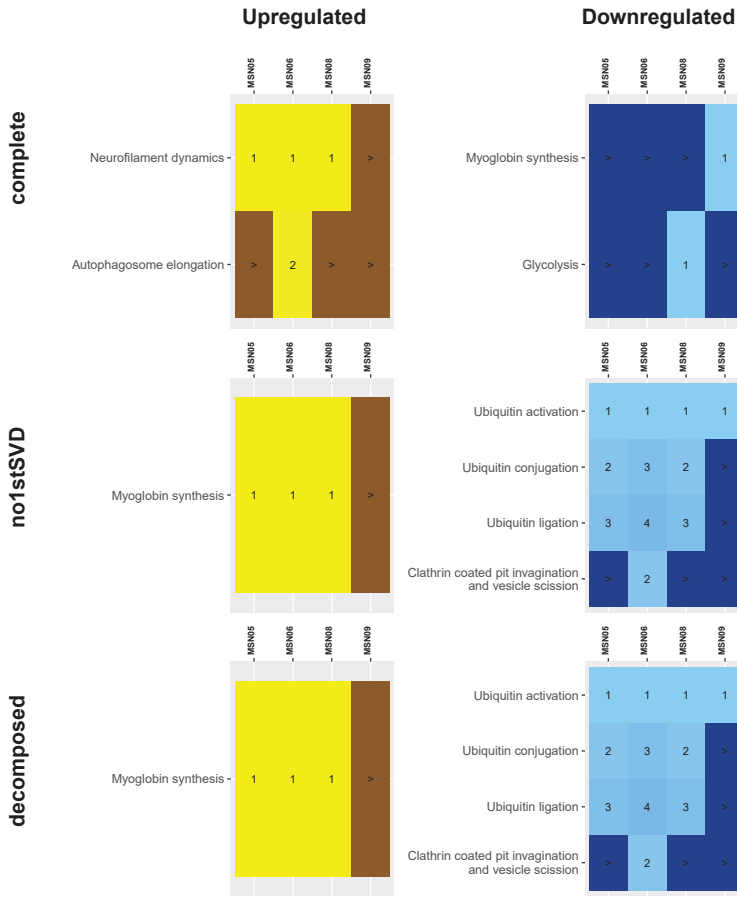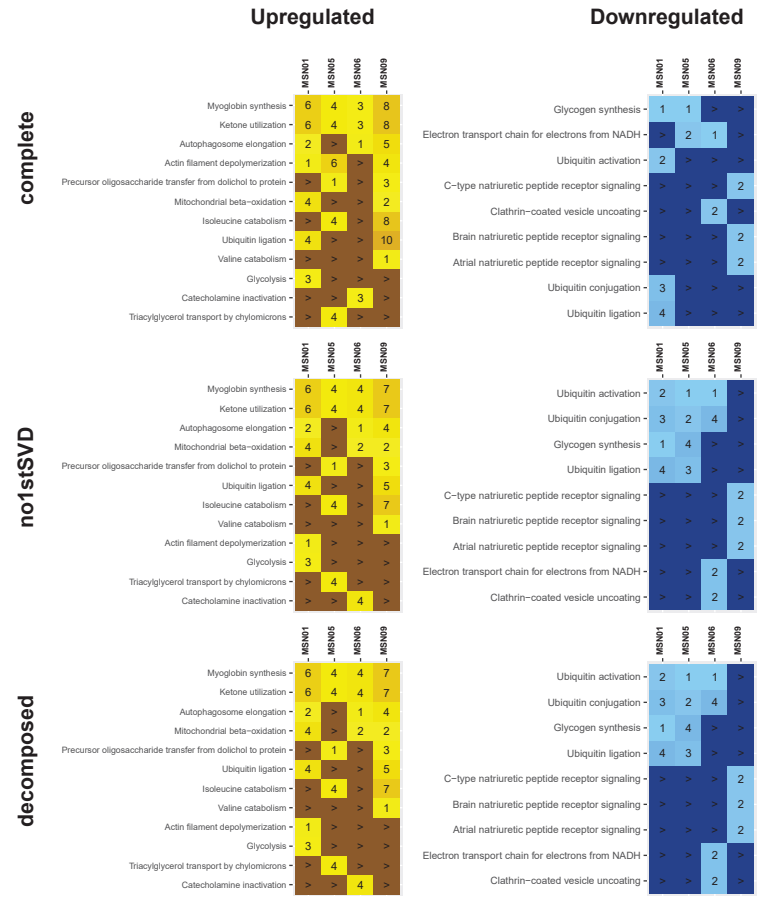

**MBCOL4  
idarubicin**  
(is c.toxic: yes)

**MBCOL4  
amiodarone**  
(is c.toxic: nd)

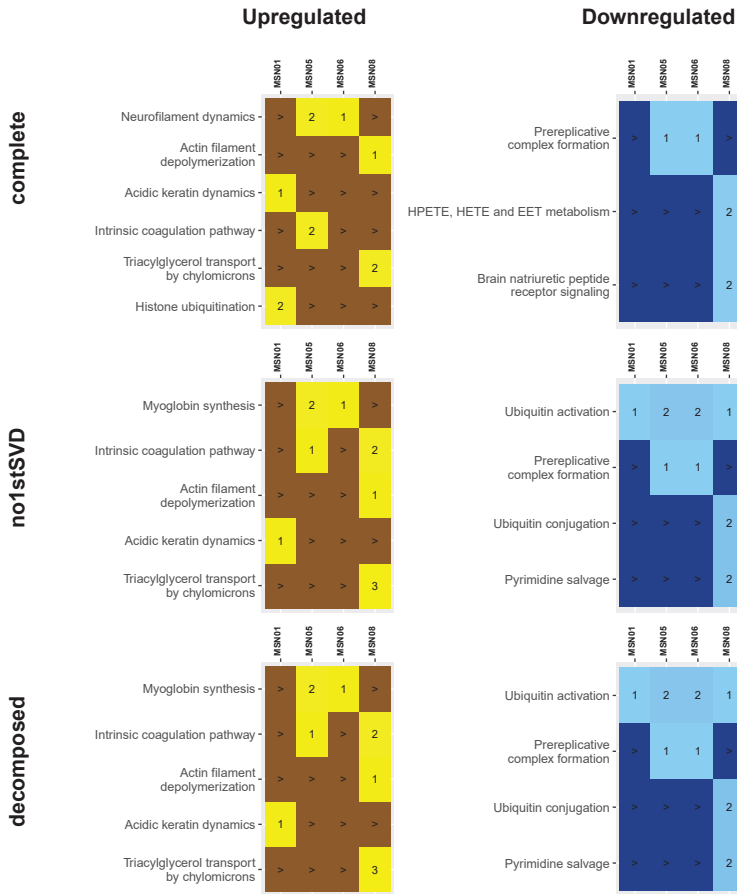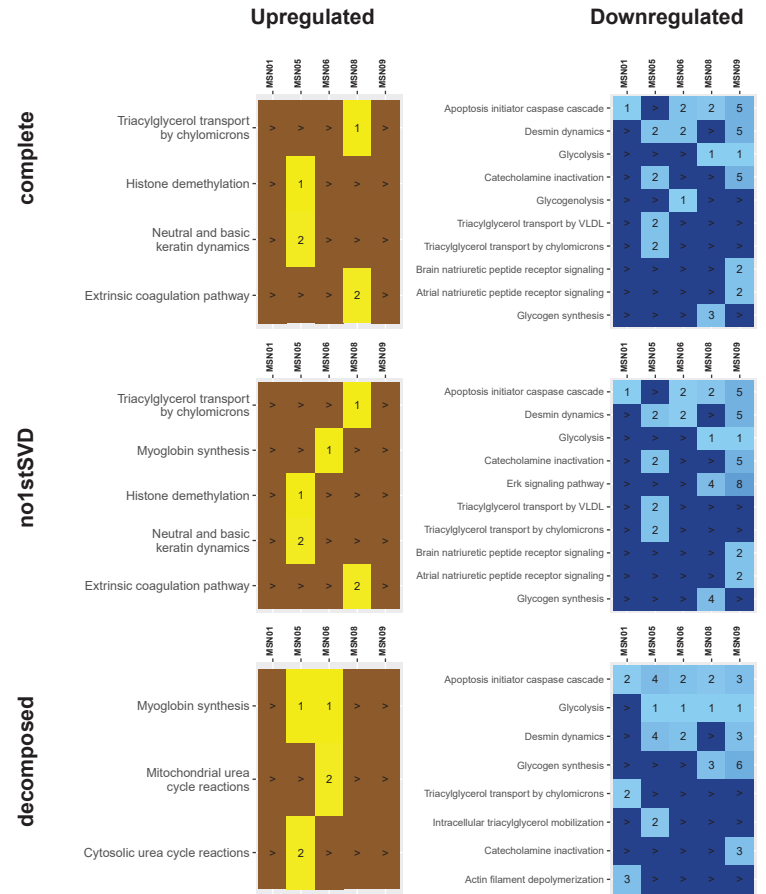

**MBCOL4**  
dobutamine  
(is c.toxic: nd)

**MBCOL4**  
flecainide  
(is c.toxic: nd)

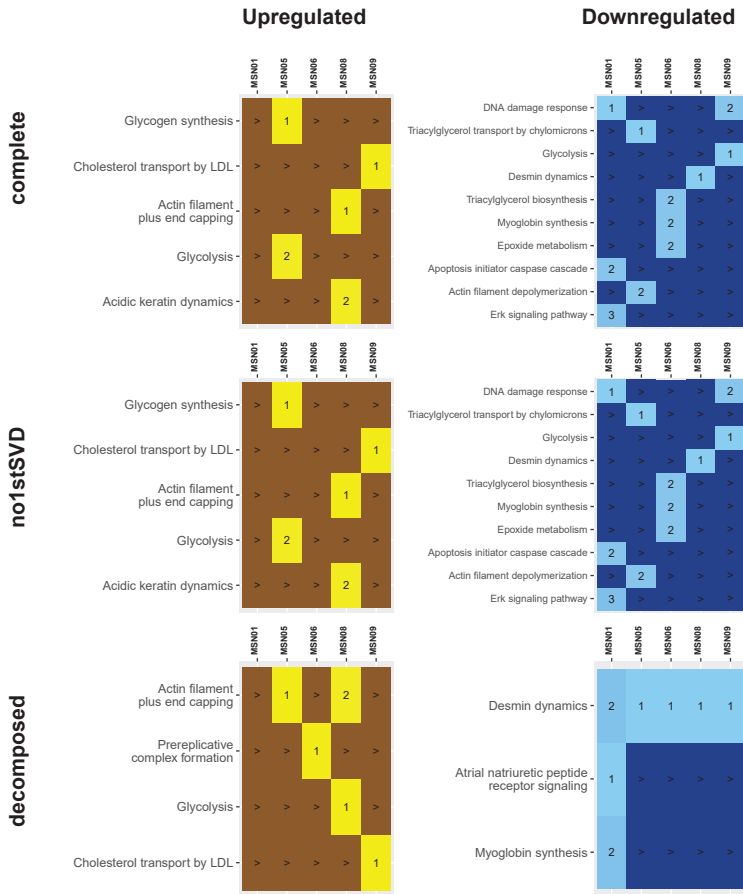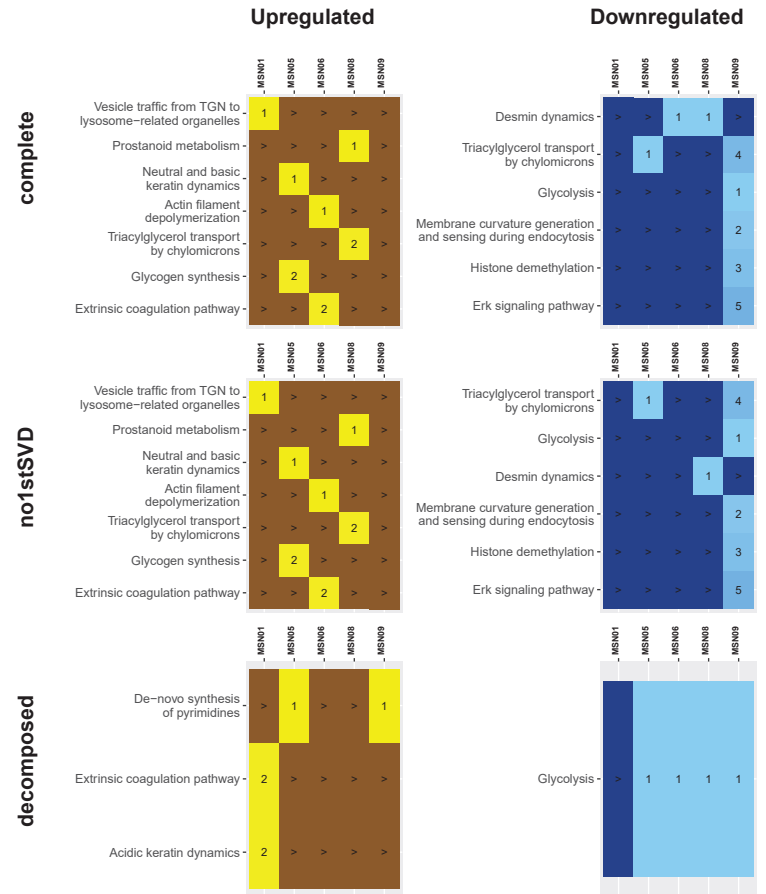

**MBCOL4**  
isoprenaline  
(is c.toxic: nd)

**MBCOL4**  
milrinone  
(is c.toxic: nd)

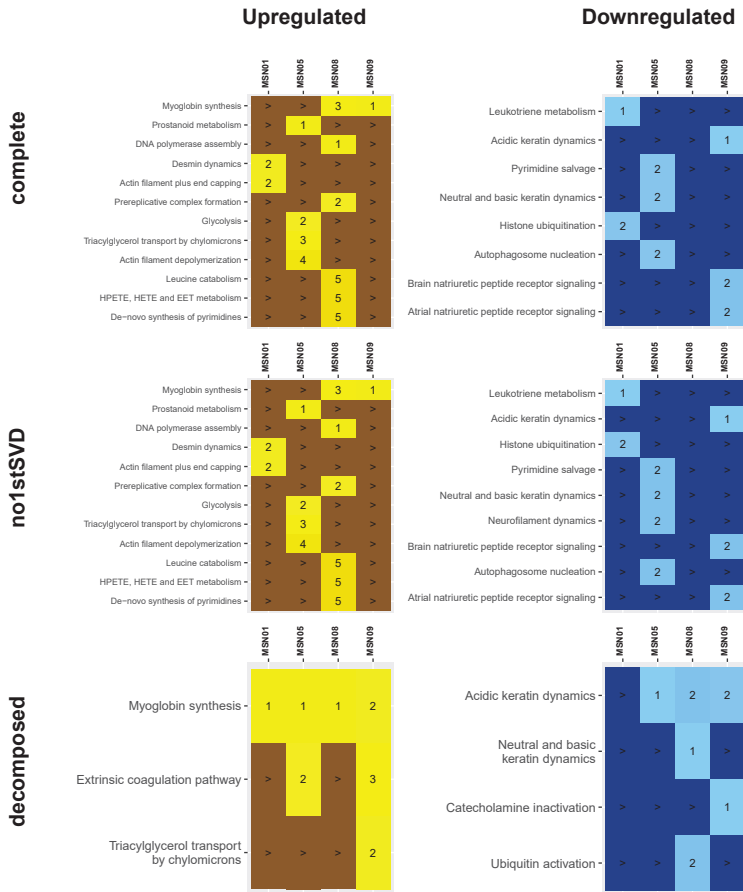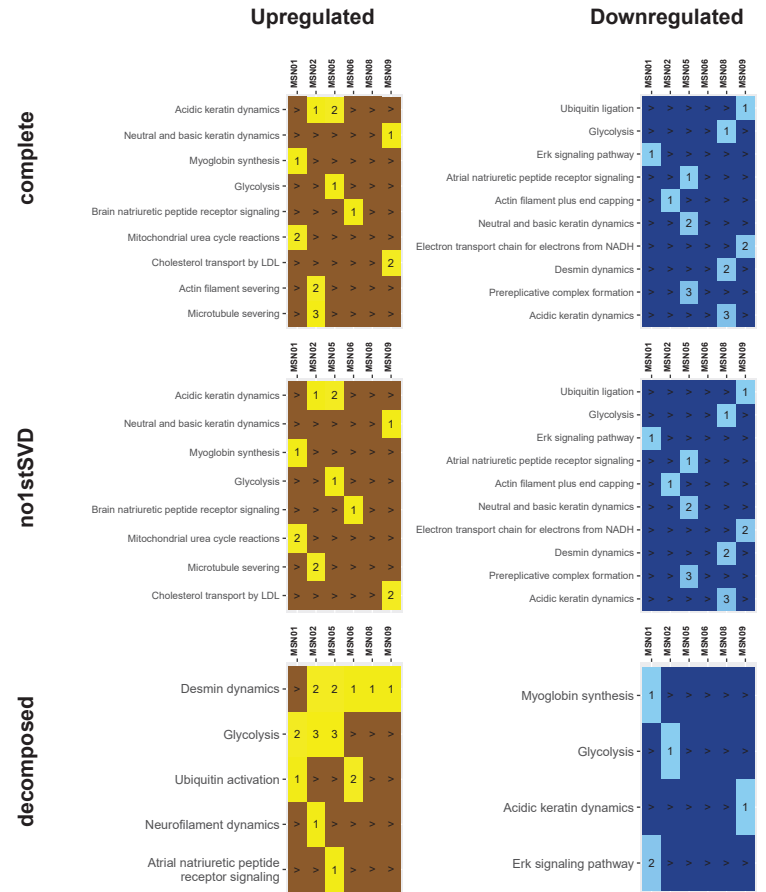

**MBCOL4  
phenylephrine**  
(is c.toxic: nd)

**MBCOL4  
verapamil**  
(is c.toxic: nd)

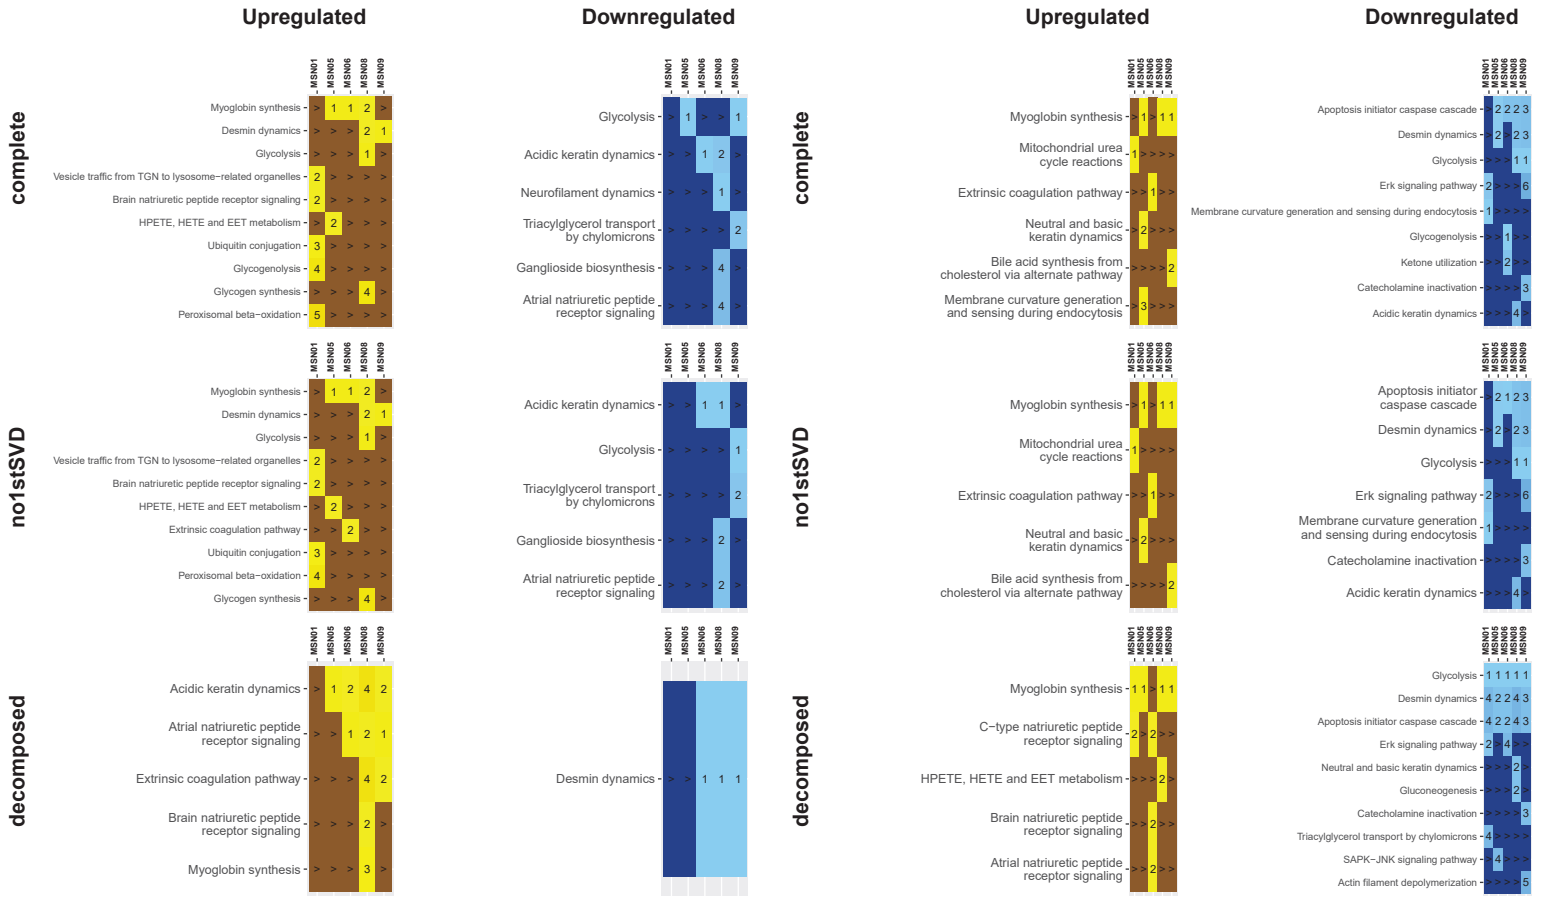

**MBCOL4  
azacitidine**  
(is c.toxic: nd)

**MBCOL4  
bortezomib**  
(is c.toxic: yes)

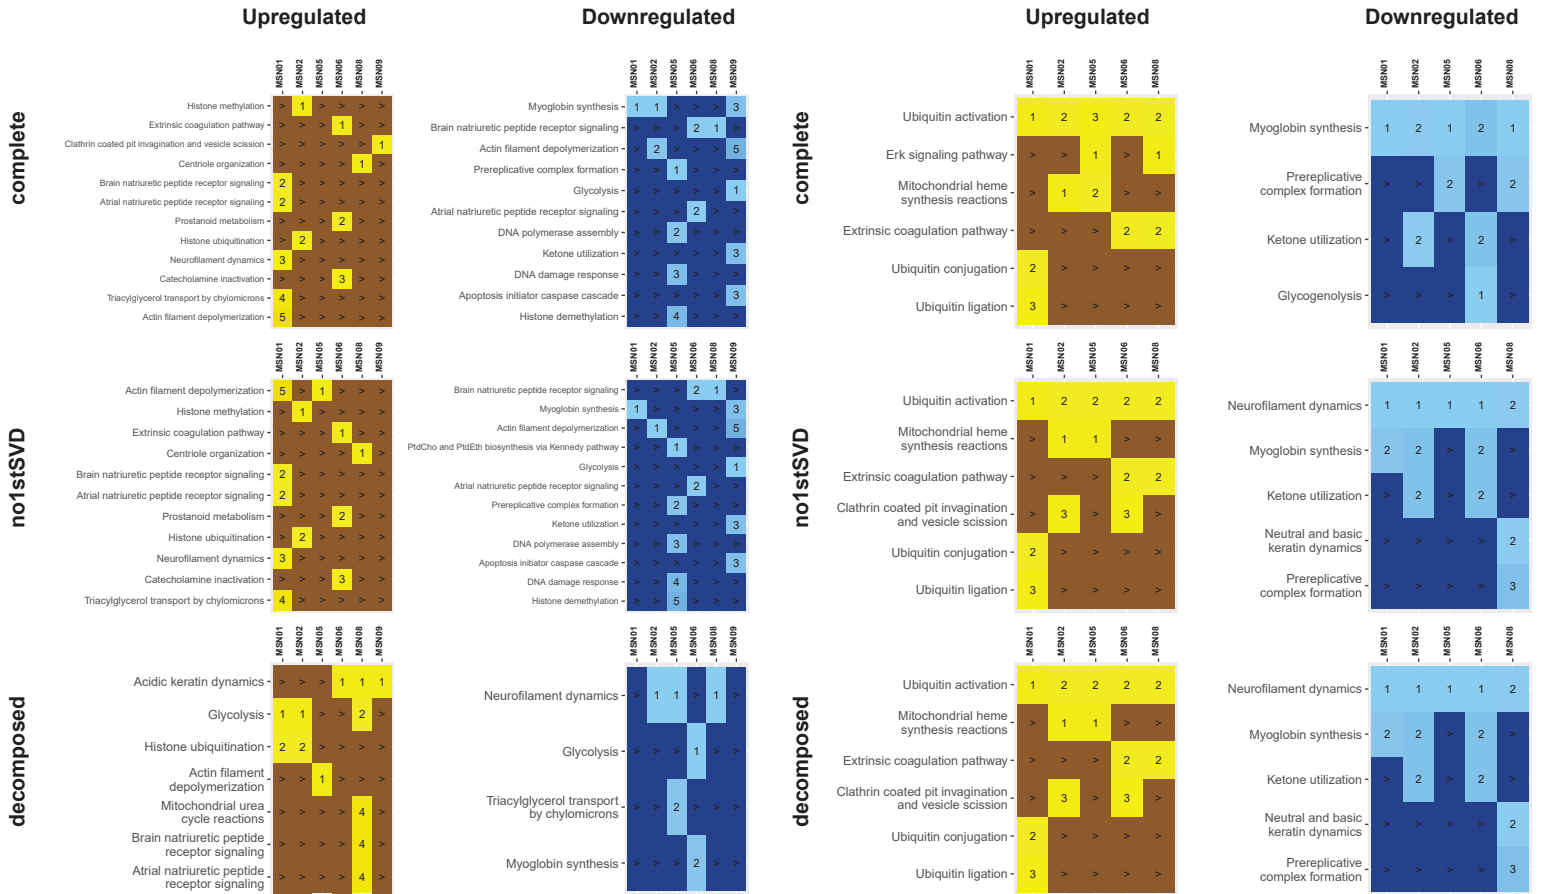

**MBCOL4  
carfilzomib  
(is c.toxic: yes)**

**MBCOL4  
cyclosporine  
(is c.toxic: nd)**

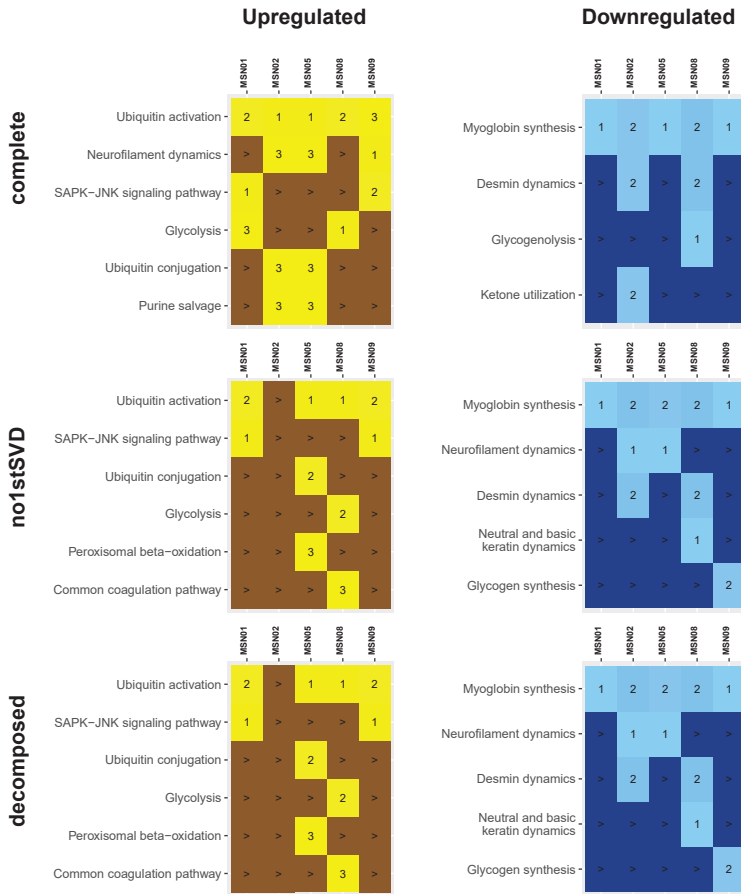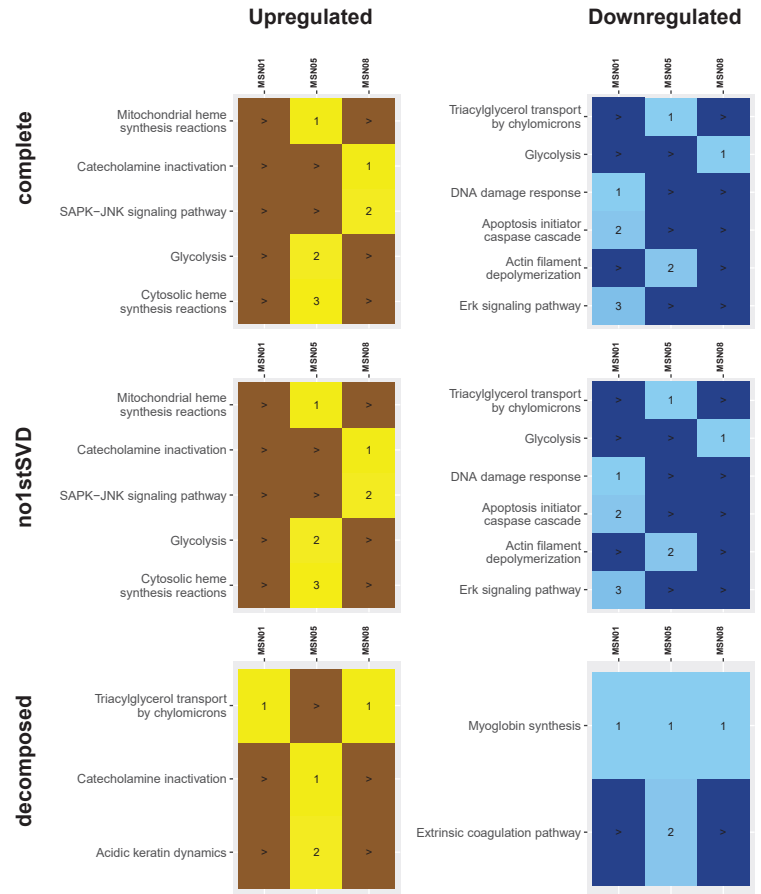

**MBCOL4  
decitabine  
(is c.toxic: nd)**

**MBCOL4  
delavirdine  
(is c.toxic: nd)**

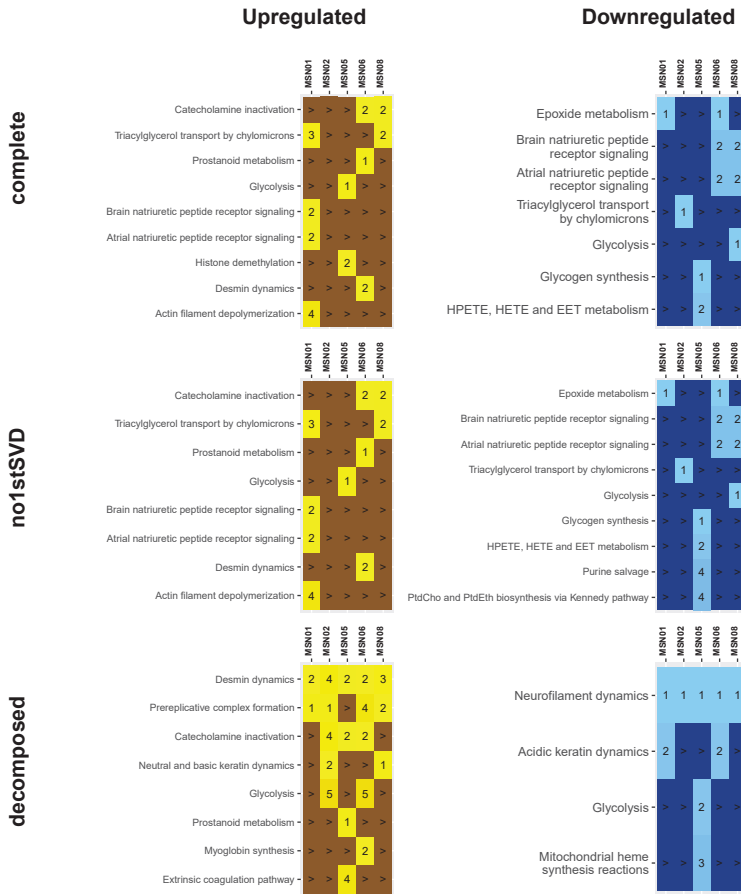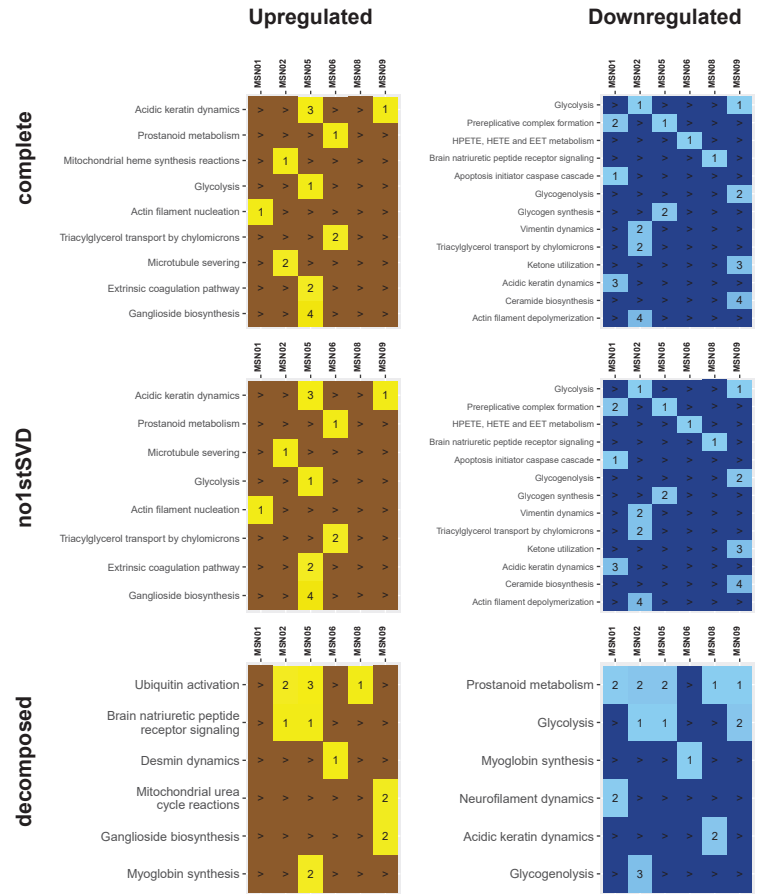

**MBCOL4  
diclofenac  
(is c.toxic: nd)**

**MBCOL4  
endothelin-1  
(is c.toxic: nd)**

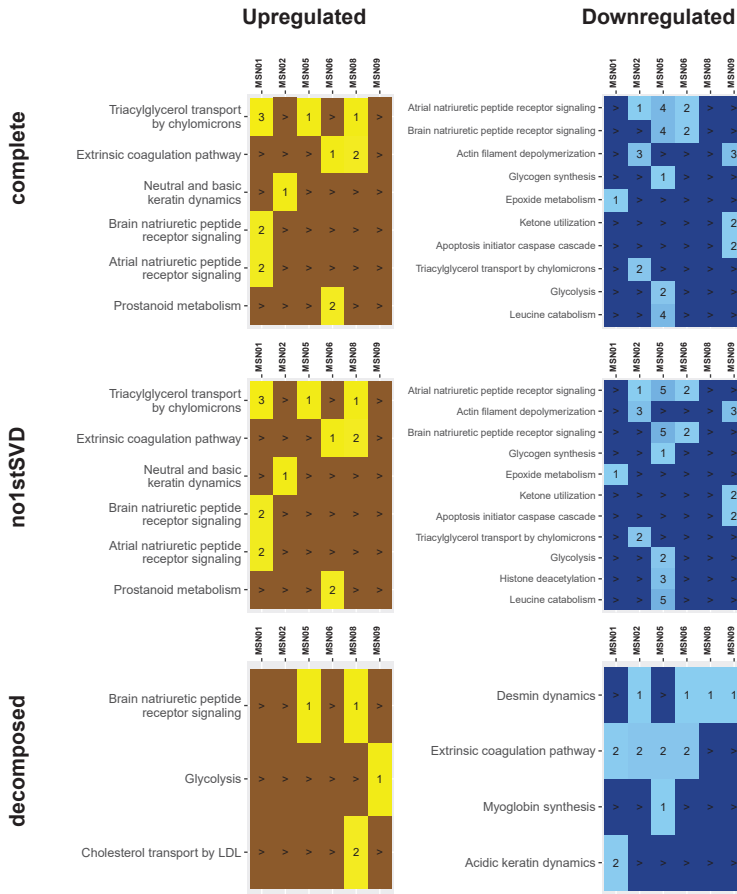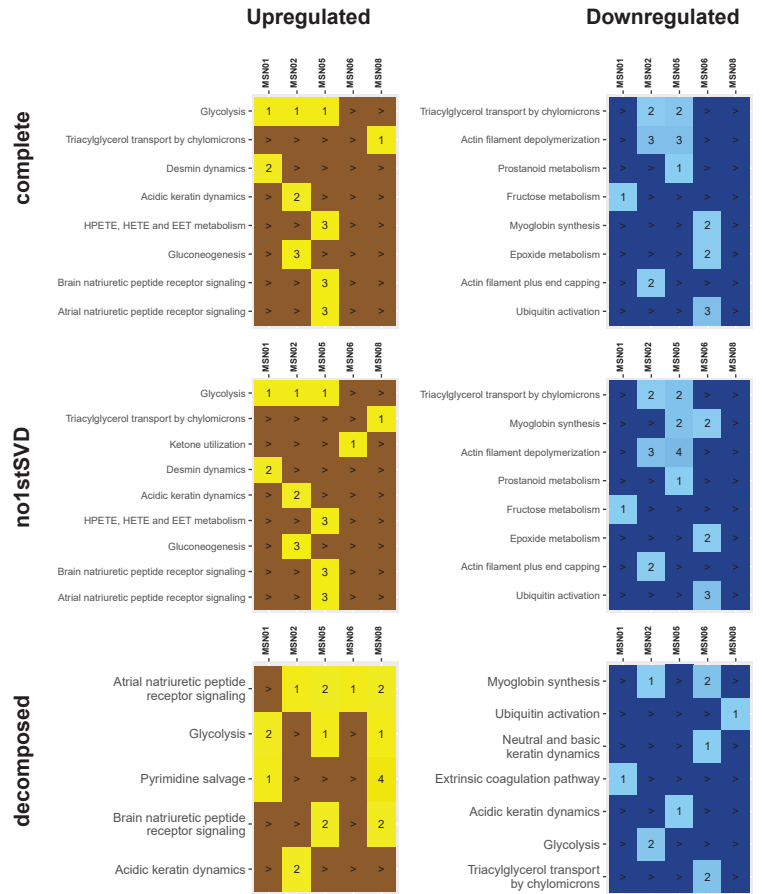

**MBCOL4  
estradiol  
(is c.toxic: nd)**

**MBCOL4  
insulin-like growth factor 1  
(is c.toxic: nd)**

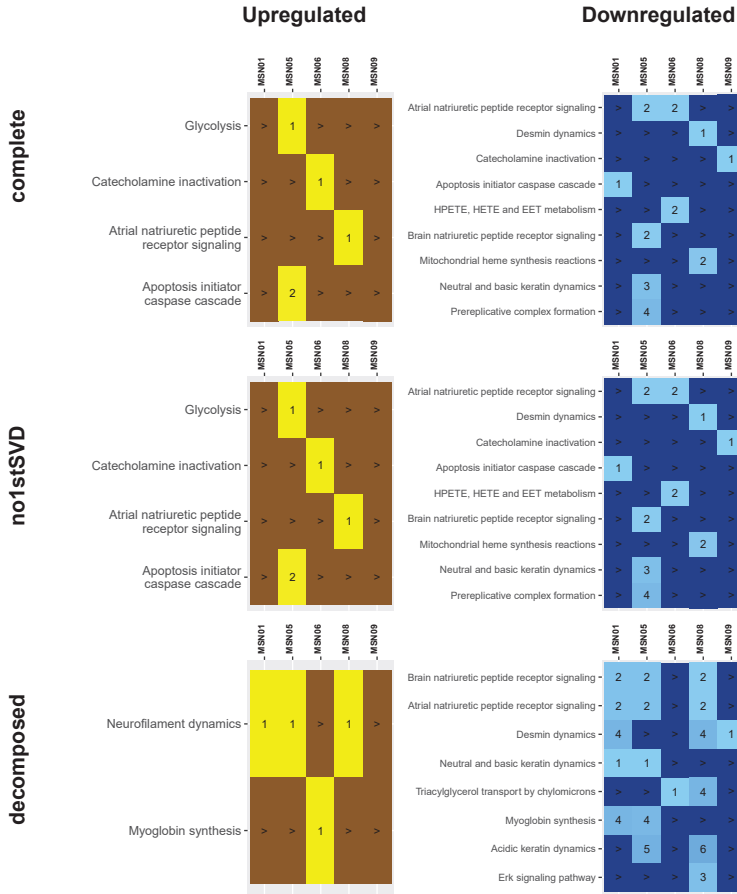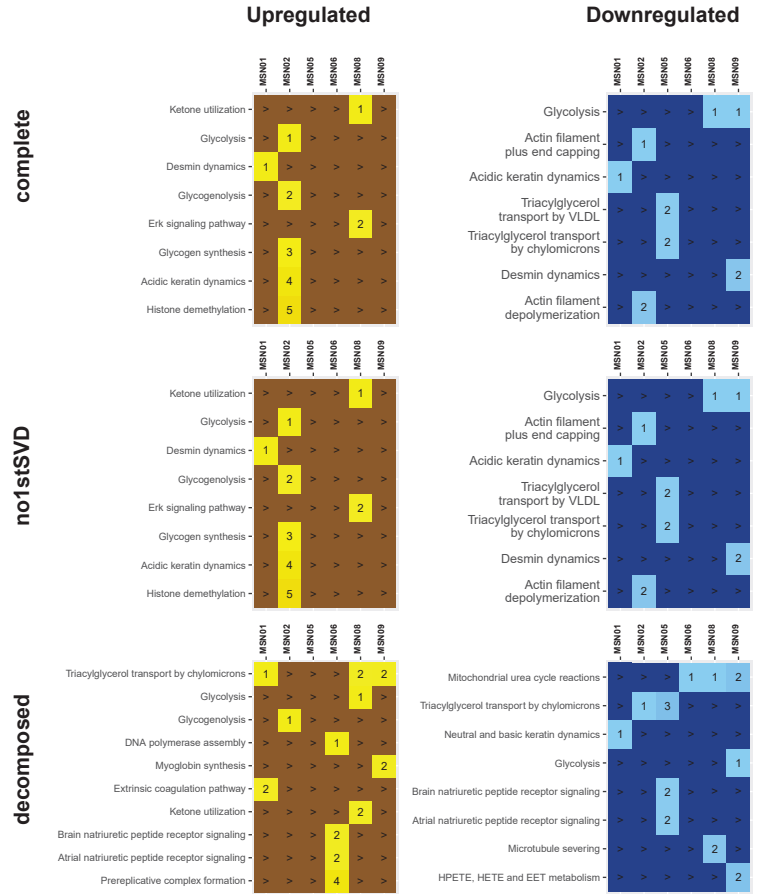

**MBCOL4  
olmesartan  
(is c.toxic: nd)**

**MBCOL4  
pioglitazone  
(is c.toxic: nd)**

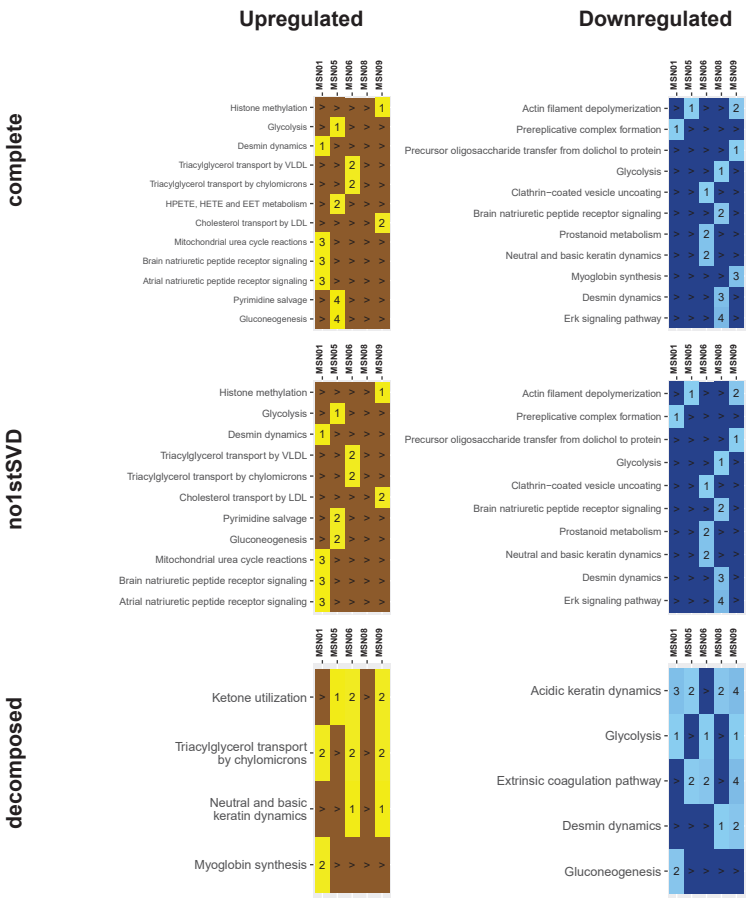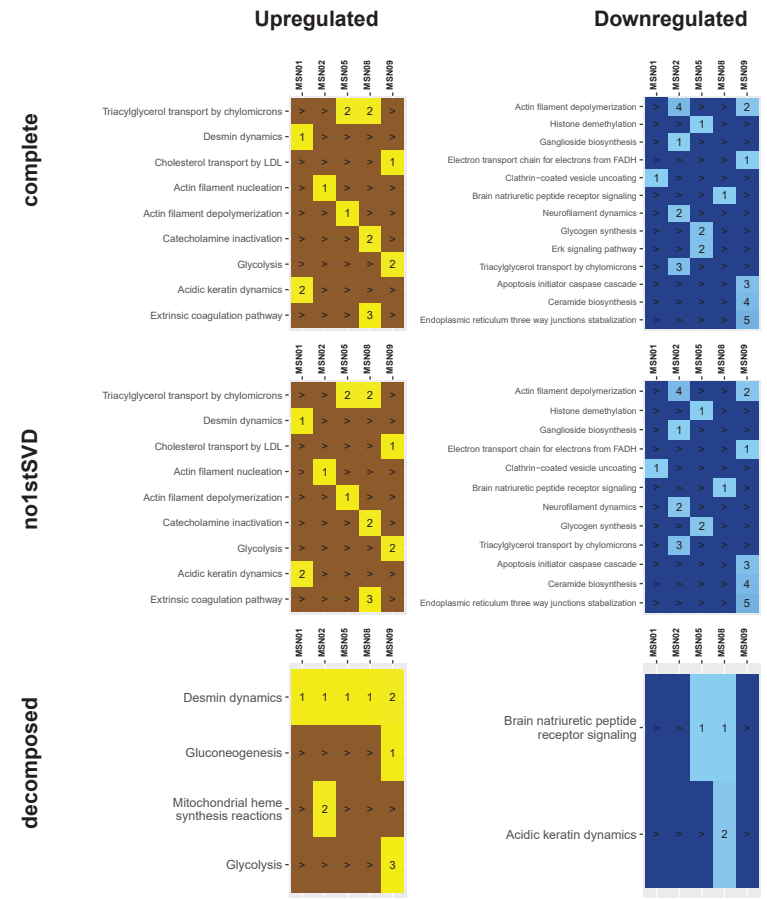

**MBCOL4  
prednisolone  
(is c.toxic: nd)**

**MBCOL4  
rosiglitazone  
(is c.toxic: nd)**

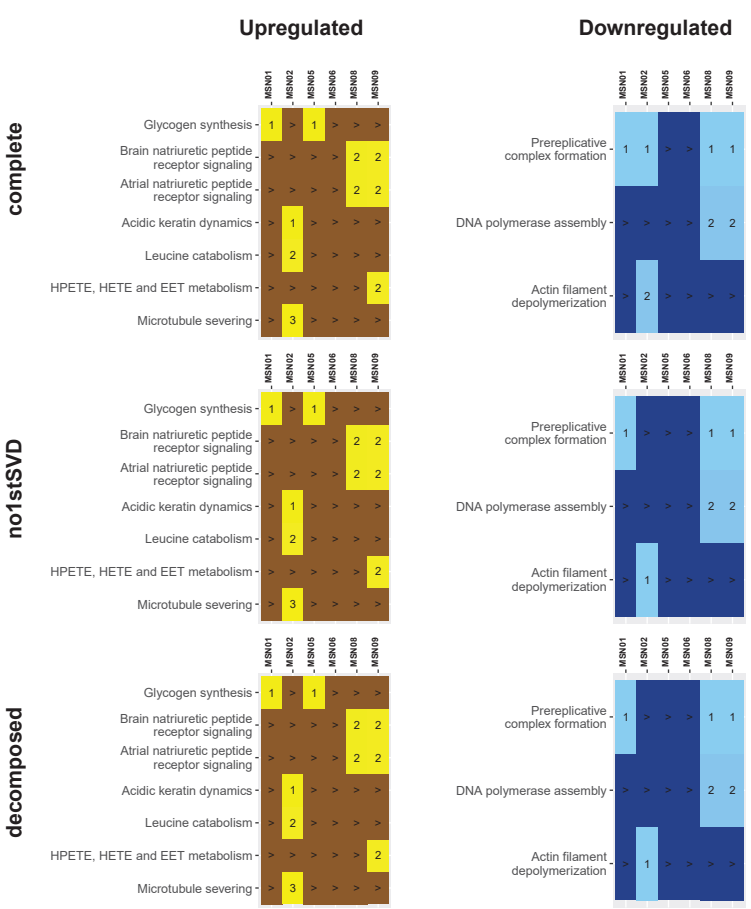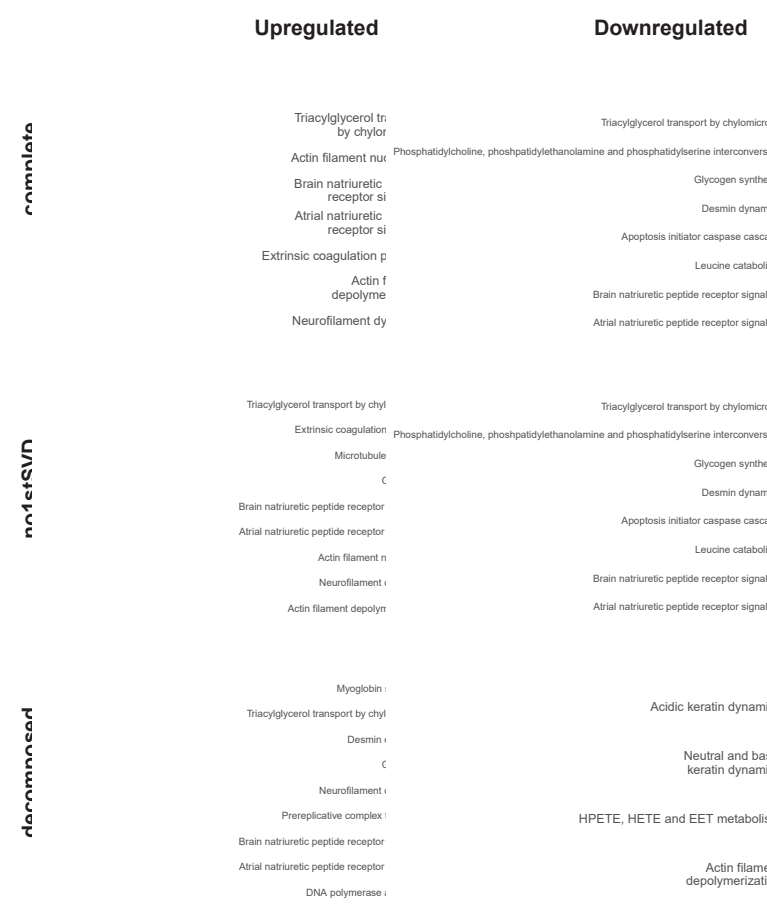



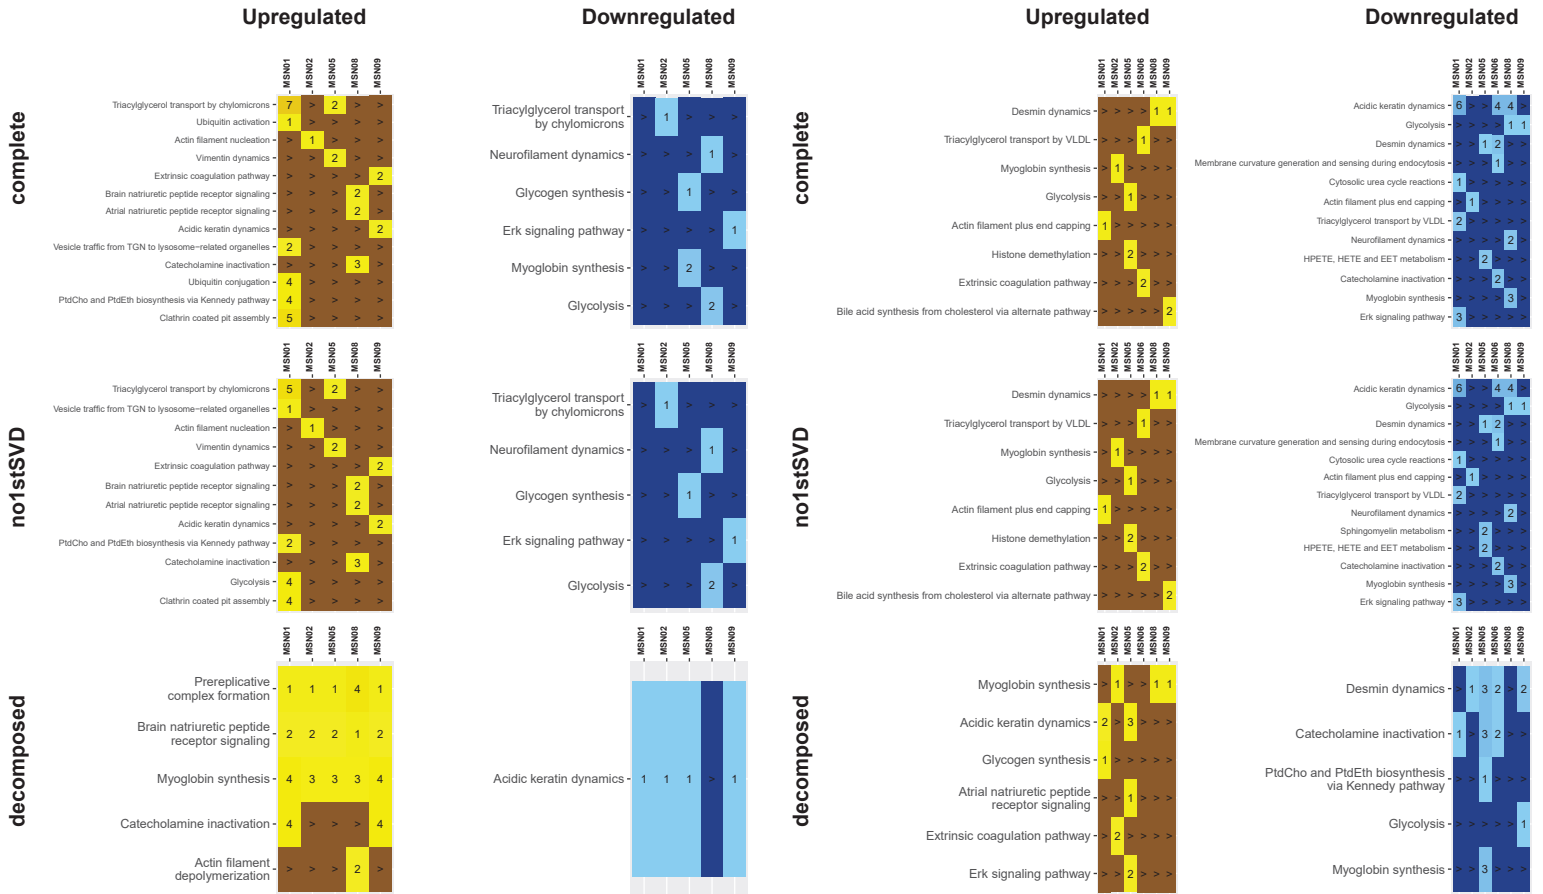

**Supplementary Figure 14.** Top Subcellular Processes predicted from complete gene expression profiles, after removal of first eigenarray and from drug-selective gene expression profiles. **(A)** Complete, decomposed gene expression profiles and gene expression profiles after removal of the first eigenarray were subjected to pathway enrichment analysis using the Molecular Biology of the Cell Ontology and Fisher's Exact Test to identify up- and downregulated subcellular processes (SCPs). Significant up- or downregulated **(B)** level-1, **(C)** -2, **(D)** -3 and **(E)** -4 SCPs ( $p\text{-value} \leq 0.05$ ) were separately ranked by significance for each cell line/drug combination. SCPs predicted for each drug are shown if they are among the top five ranked SCPs for at least one cell line. Numbers indicate ranks, '>' indicates that an SCP was not predicted or predicted with a rank above 99. Cell lines with identified outlier responses to treatment with a drug of interest are colored purple.

MBCOL1 – Cardiotoxicity  
Amino acid metabolism

MBCOL1 – Cardiotoxicity  
Amino acid metabolism

MBCOL1 – Cardiotoxicity  
Amino acid metabolism

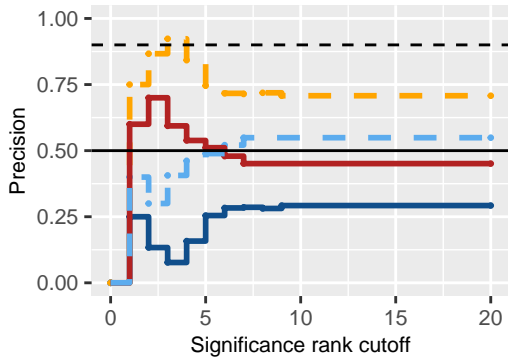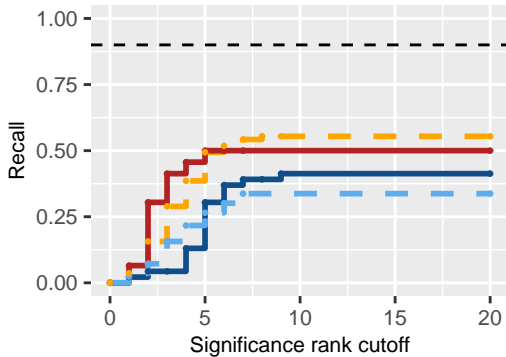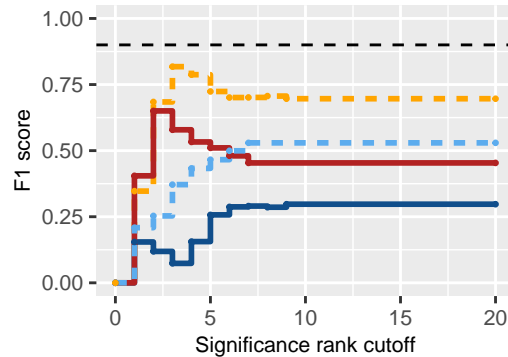

MBCOL1 – Cardiotoxicity  
Cell cycle and cell division

MBCOL1 – Cardiotoxicity  
Cell cycle and cell division

MBCOL1 – Cardiotoxicity  
Cell cycle and cell division

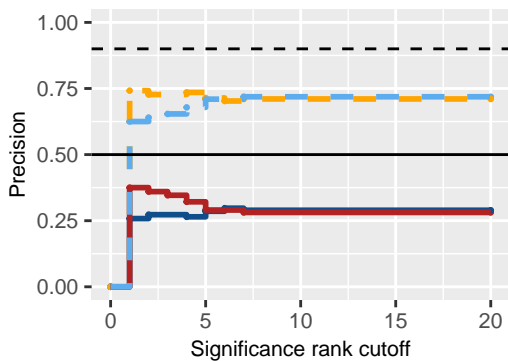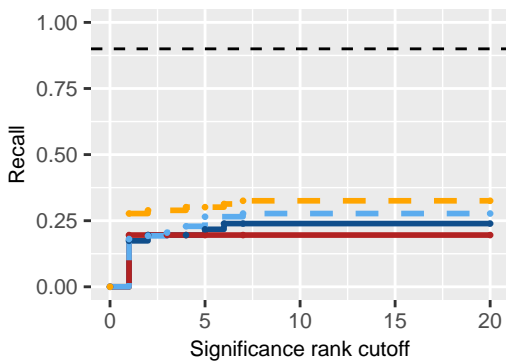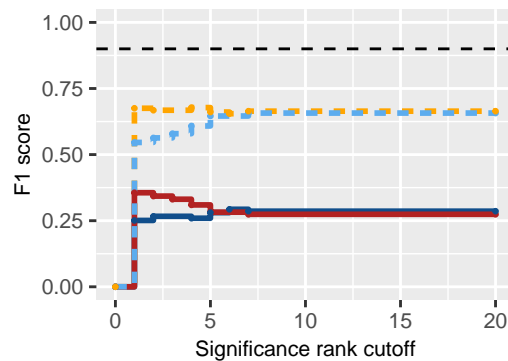

MBCOL1 – Cardiotoxicity  
Cellular adhesion

MBCOL1 – Cardiotoxicity  
Cellular adhesion

MBCOL1 – Cardiotoxicity  
Cellular adhesion

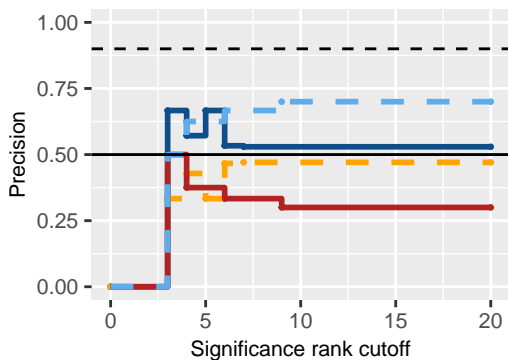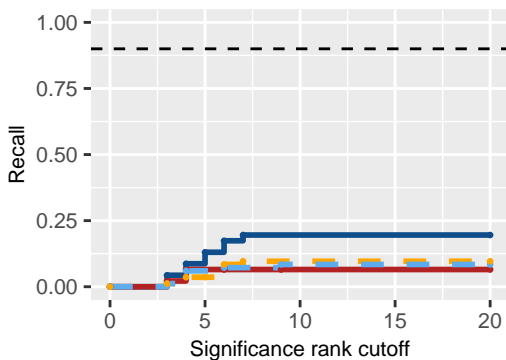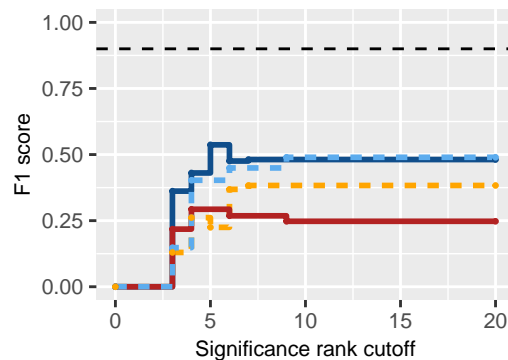

MBCOL1 – Cardiotoxicity  
Cellular communication

MBCOL1 – Cardiotoxicity  
Cellular communication

MBCOL1 – Cardiotoxicity  
Cellular communication

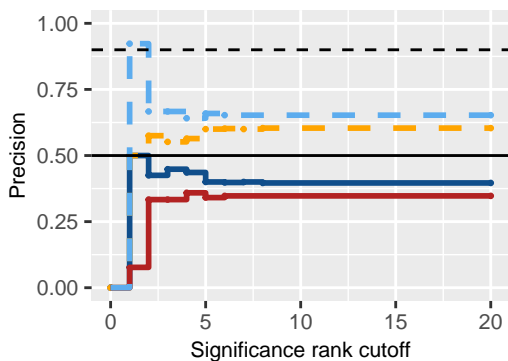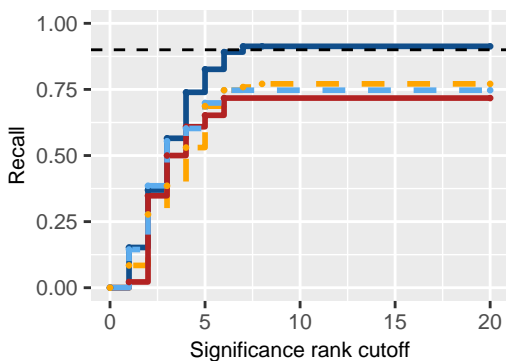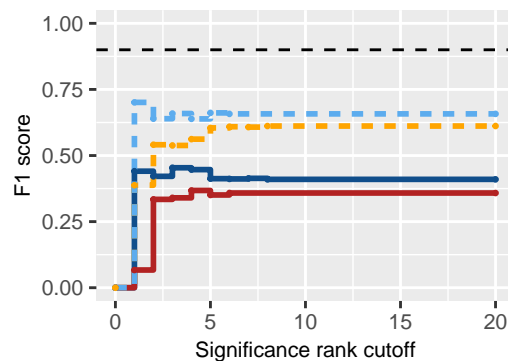

MBCOL1 – Cardiotoxicity  
Cellular contraction

MBCOL1 – Cardiotoxicity  
Cellular contraction

MBCOL1 – Cardiotoxicity  
Cellular contraction

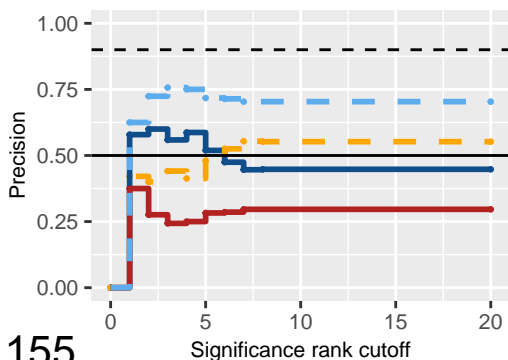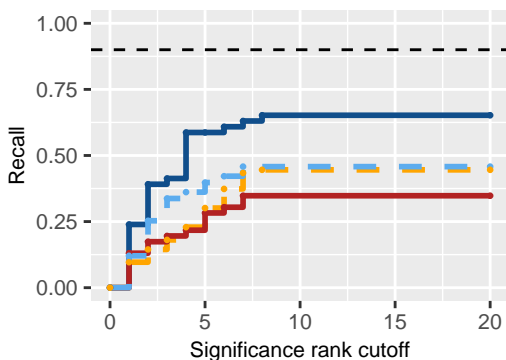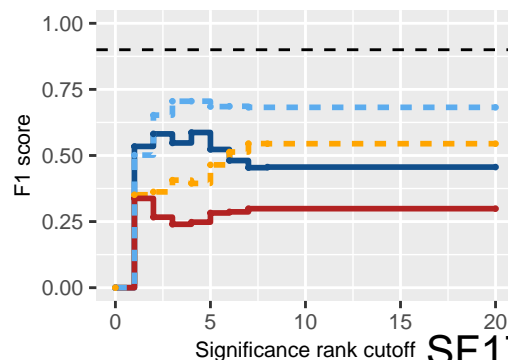

MBCOL1 – Cardiotoxicity  
Cellular redox homeostasis

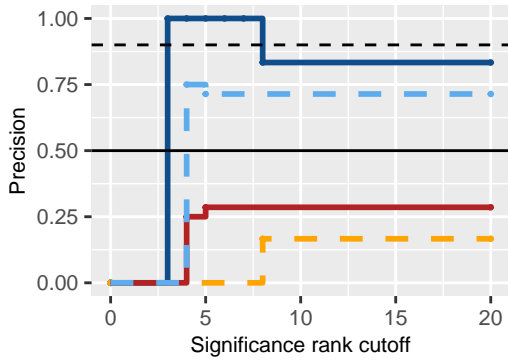

MBCOL1 – Cardiotoxicity  
Cellular redox homeostasis

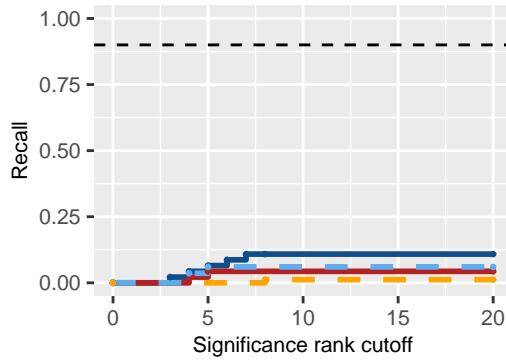

MBCOL1 – Cardiotoxicity  
Cellular redox homeostasis

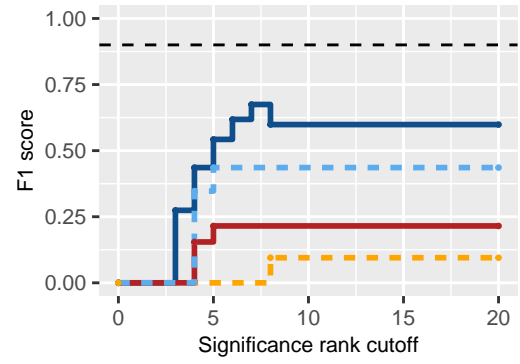

MBCOL1 – Cardiotoxicity  
Coag., fib., compl. system  
and blood protein dynamics

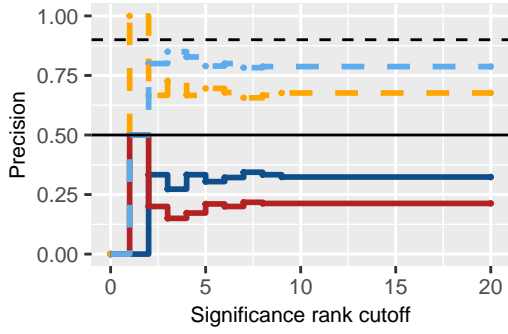

MBCOL1 – Cardiotoxicity  
Coag., fib., compl. system  
and blood protein dynamics

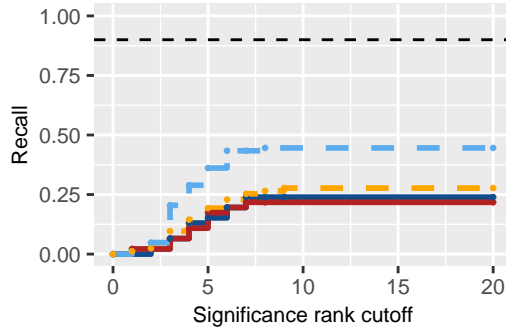

MBCOL1 – Cardiotoxicity  
Coag., fib., compl. system  
and blood protein dynamics

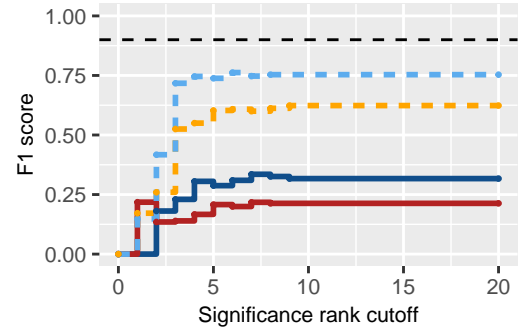

MBCOL1 – Cardiotoxicity  
DNA replication,  
recombination and repair

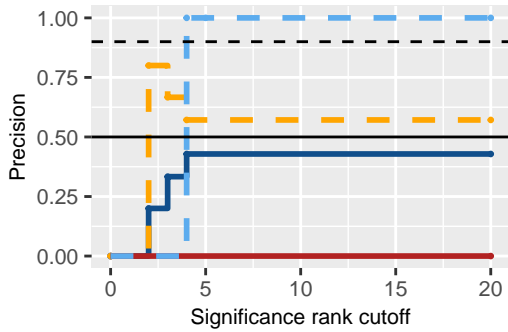

MBCOL1 – Cardiotoxicity  
DNA replication,  
recombination and repair

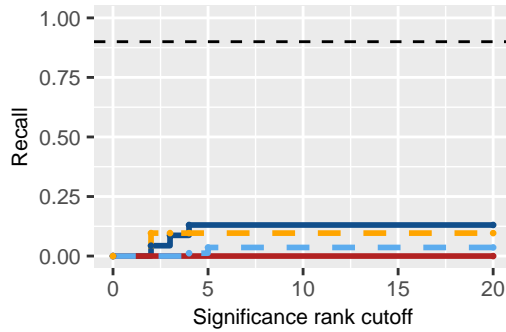

MBCOL1 – Cardiotoxicity  
DNA replication,  
recombination and repair

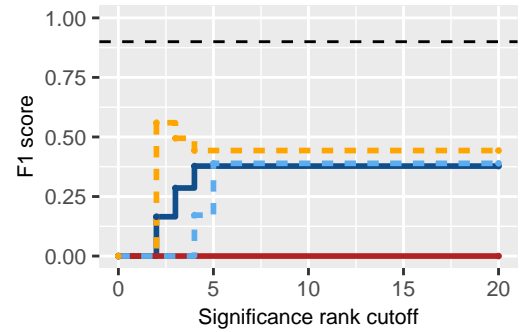

MBCOL1 – Cardiotoxicity  
ECM homeostasis

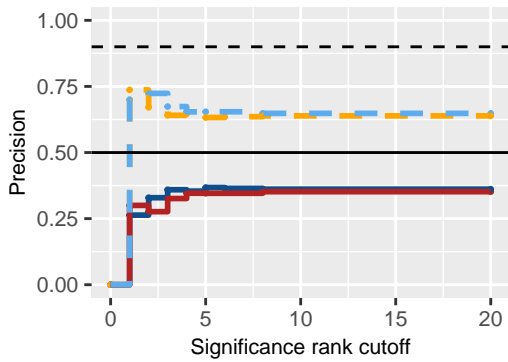

MBCOL1 – Cardiotoxicity  
ECM homeostasis

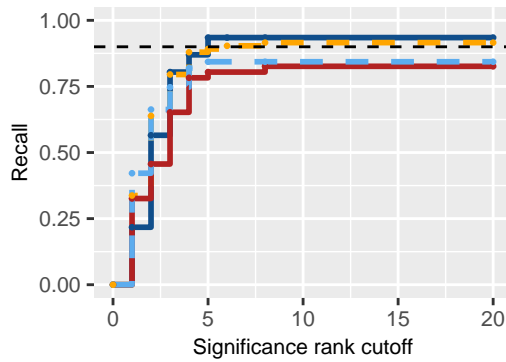

MBCOL1 – Cardiotoxicity  
ECM homeostasis

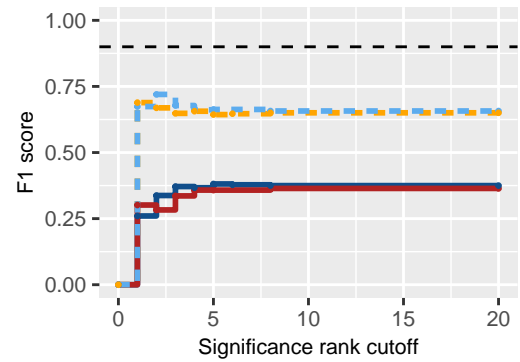

MBCOL1 – Cardiotoxicity  
Energy generation and  
metabolism of cellular monomers

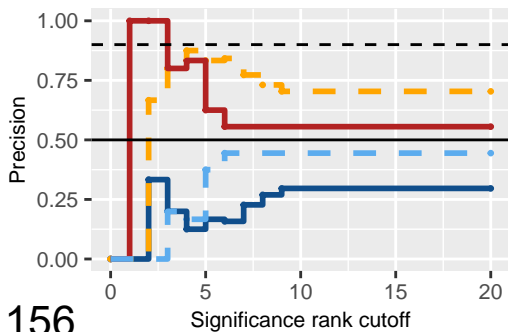

MBCOL1 – Cardiotoxicity  
Energy generation and  
metabolism of cellular monomers

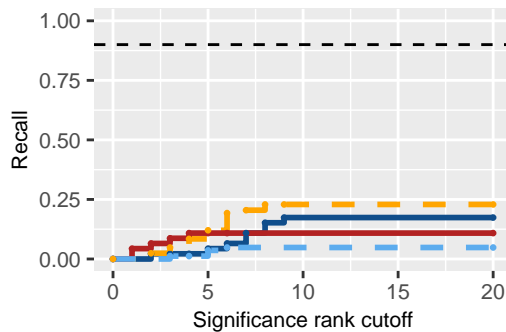

MBCOL1 – Cardiotoxicity  
Energy generation and  
metabolism of cellular monomers

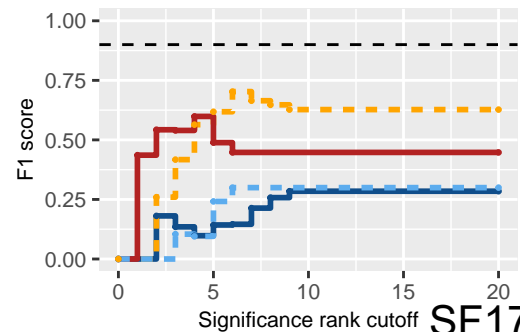

MBCOL1 – Cardiotoxicity  
Lipid metabolism

MBCOL1 – Cardiotoxicity  
Lipid metabolism

MBCOL1 – Cardiotoxicity  
Lipid metabolism

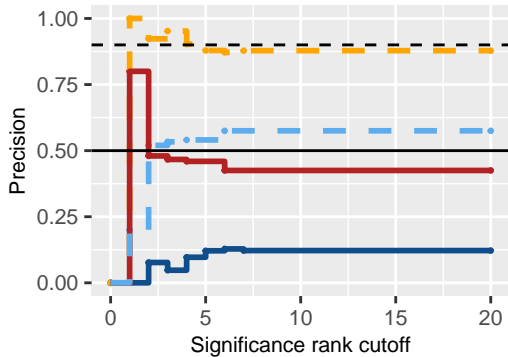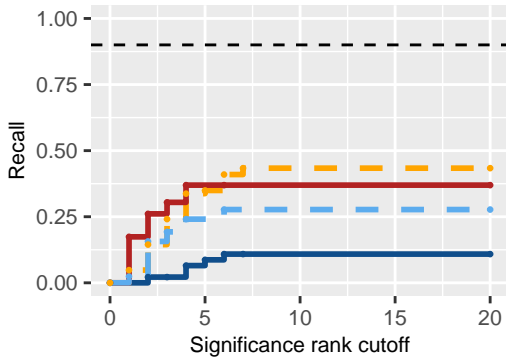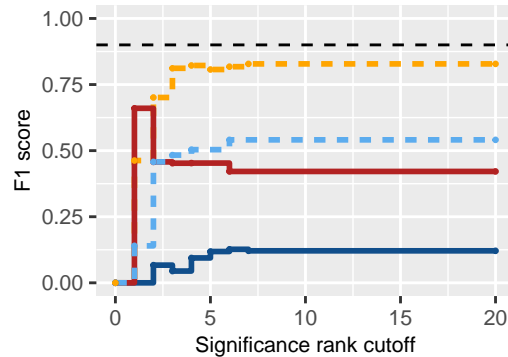

MBCOL1 – Cardiotoxicity  
Nucleotide metabolism

MBCOL1 – Cardiotoxicity  
Nucleotide metabolism

MBCOL1 – Cardiotoxicity  
Nucleotide metabolism

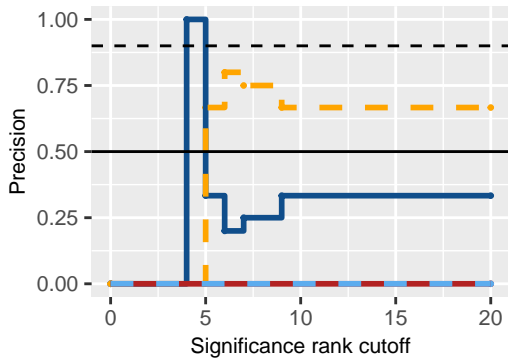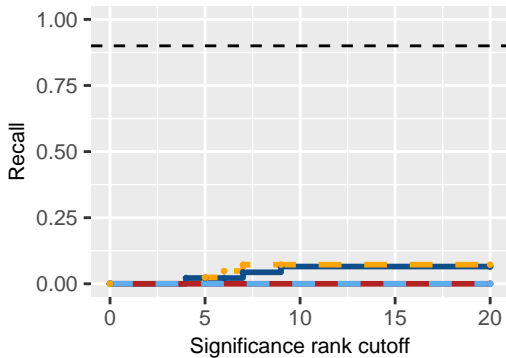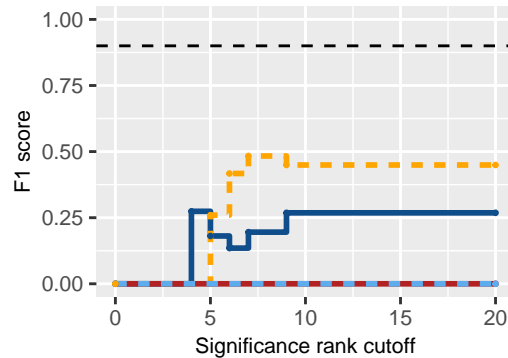

MBCOL1 – Cardiotoxicity  
Posttranslational  
protein modification

MBCOL1 – Cardiotoxicity  
Posttranslational  
protein modification

MBCOL1 – Cardiotoxicity  
Posttranslational  
protein modification

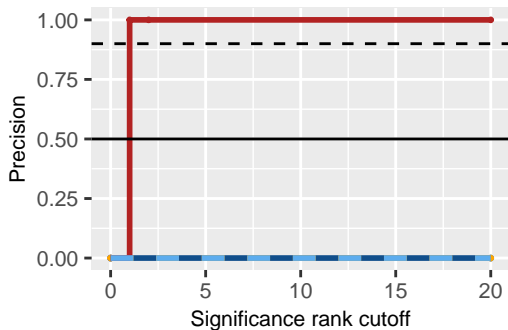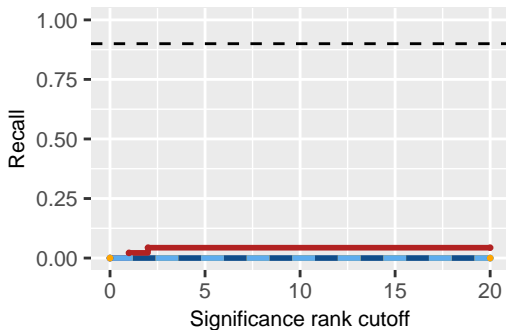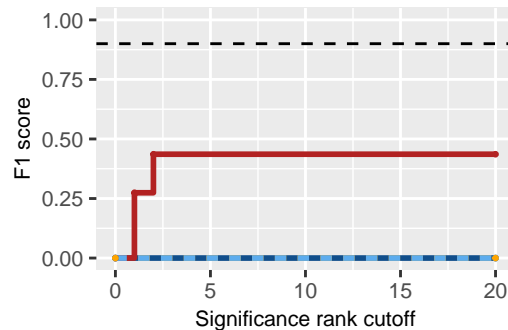

MBCOL1 – Cardiotoxicity  
Regulated cell death

MBCOL1 – Cardiotoxicity  
Regulated cell death

MBCOL1 – Cardiotoxicity  
Regulated cell death

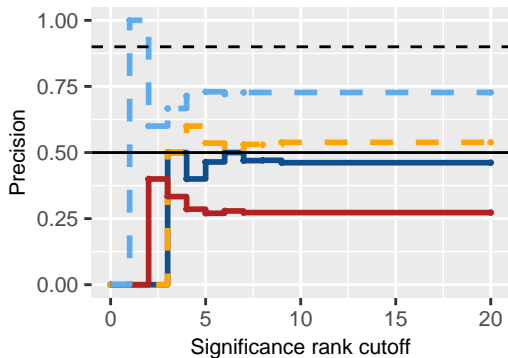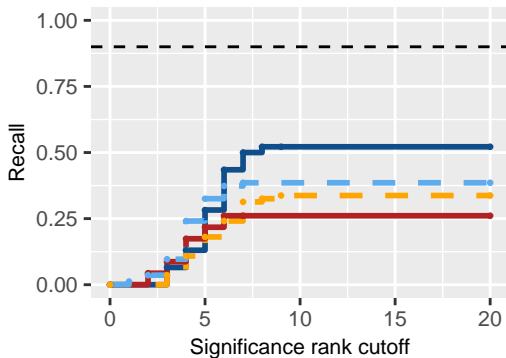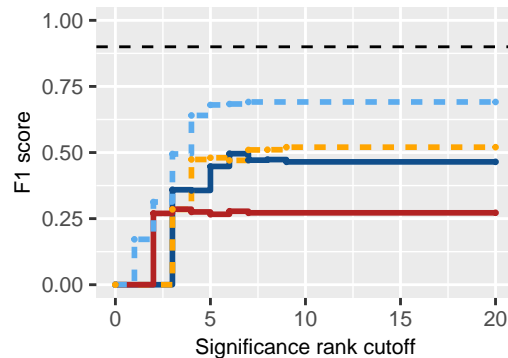

MBCOL2 – Cardiotoxicity  
Apoptosis

MBCOL2 – Cardiotoxicity  
Apoptosis

MBCOL2 – Cardiotoxicity  
Apoptosis

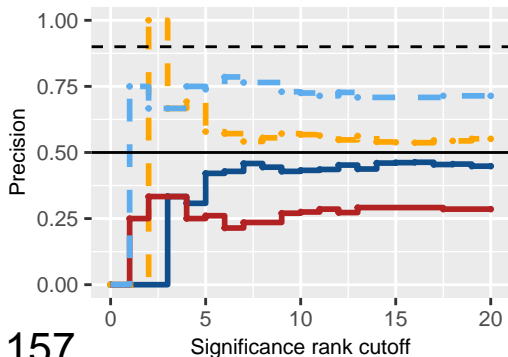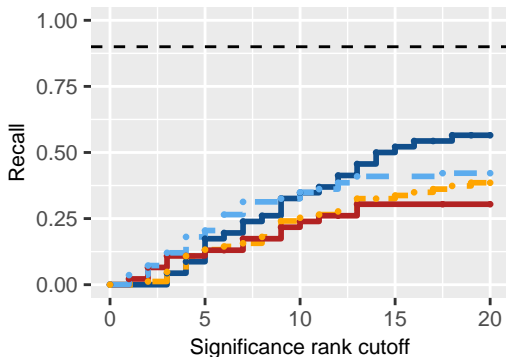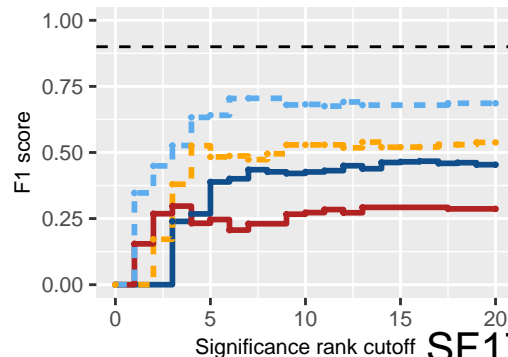



MBCOL2 – Cardiotoxicity  
Fatty acid metabolism

MBCOL2 – Cardiotoxicity  
Fatty acid metabolism

MBCOL2 – Cardiotoxicity  
Fatty acid metabolism

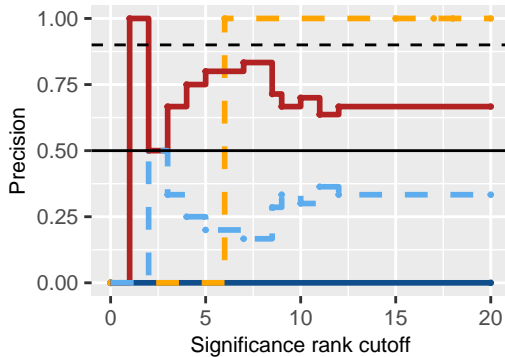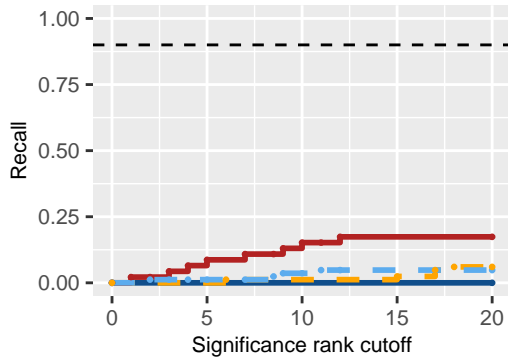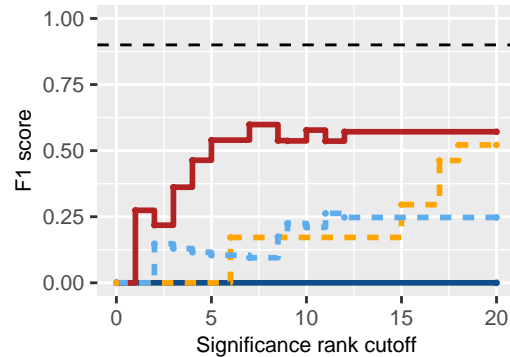

MBCOL2 – Cardiotoxicity  
Interferon signaling

MBCOL2 – Cardiotoxicity  
Interferon signaling

MBCOL2 – Cardiotoxicity  
Interferon signaling

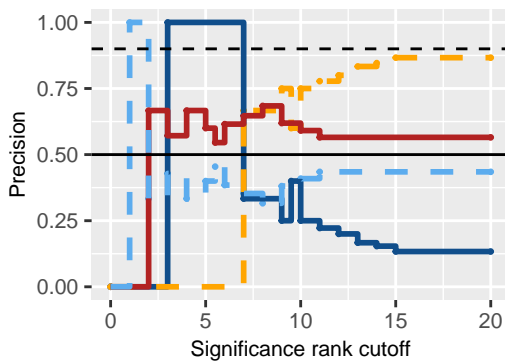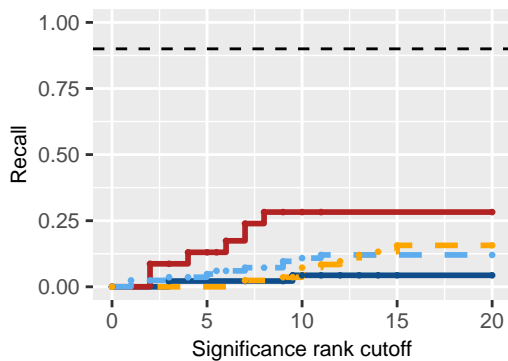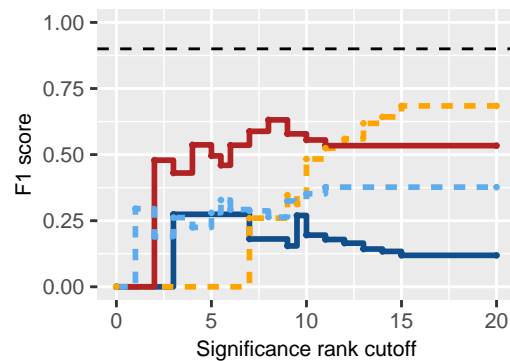

MBCOL2 – Cardiotoxicity  
Interleukin receptor signaling

MBCOL2 – Cardiotoxicity  
Interleukin receptor signaling

MBCOL2 – Cardiotoxicity  
Interleukin receptor signaling

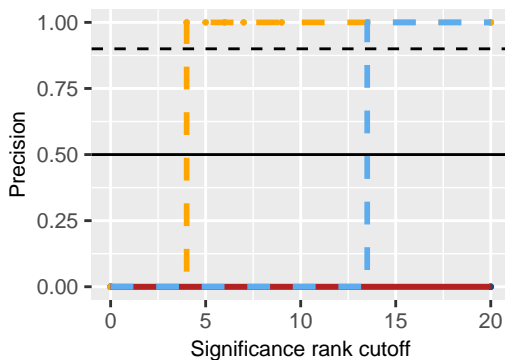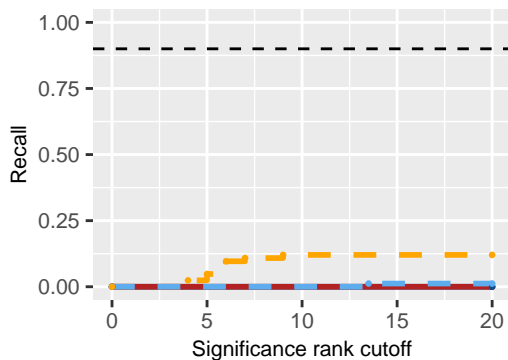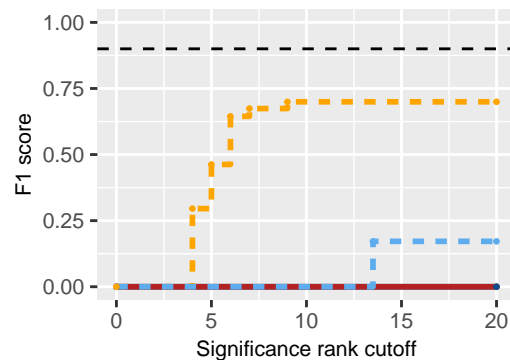

MBCOL2 – Cardiotoxicity  
Matricellular protein signaling

MBCOL2 – Cardiotoxicity  
Matricellular protein signaling

MBCOL2 – Cardiotoxicity  
Matricellular protein signaling

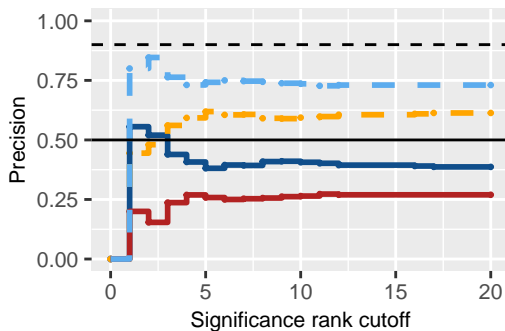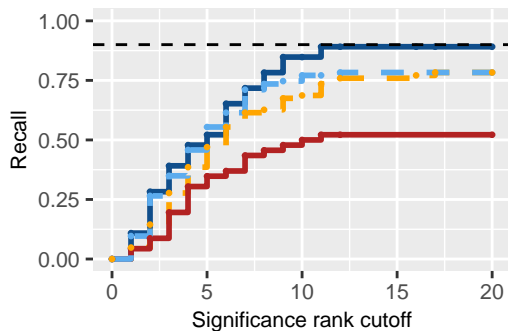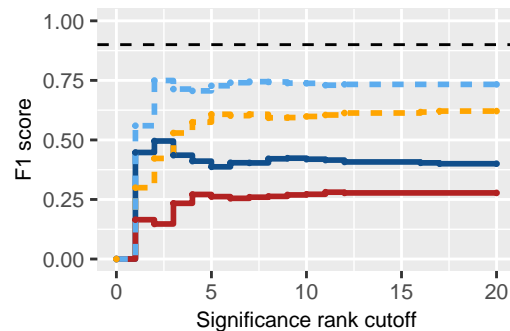

MBCOL2 – Cardiotoxicity  
Metabolism and transport  
of cholesterol, steroids  
and bile acids

MBCOL2 – Cardiotoxicity  
Metabolism and transport  
of cholesterol, steroids  
and bile acids

MBCOL2 – Cardiotoxicity  
Metabolism and transport  
of cholesterol, steroids  
and bile acids

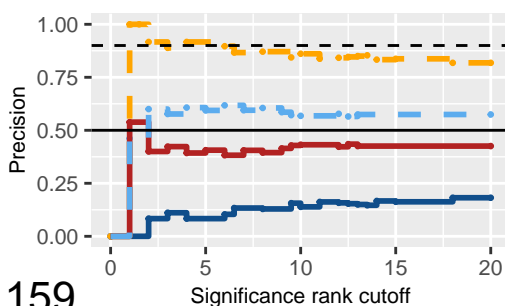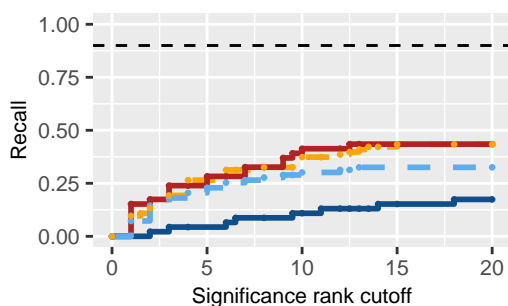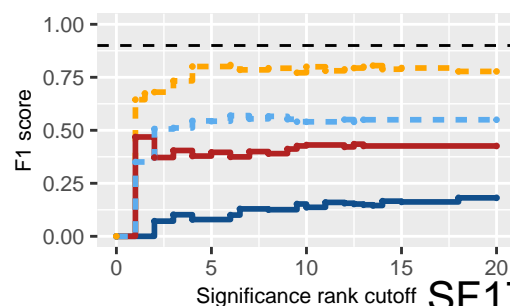





MBCOL2 – Cardiotoxicity  
PT protein modification  
in mitochondria

MBCOL2 – Cardiotoxicity  
PT protein modification  
in mitochondria

MBCOL2 – Cardiotoxicity  
PT protein modification  
in mitochondria

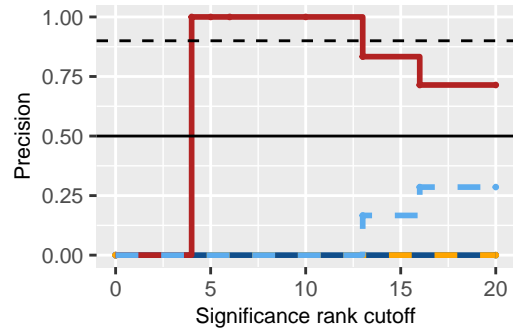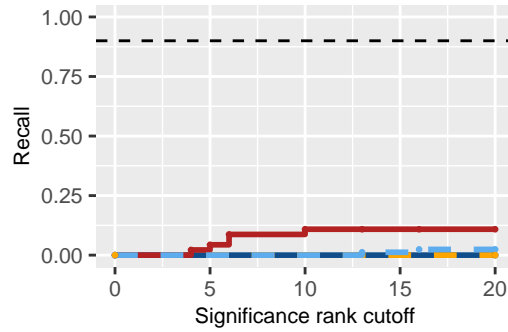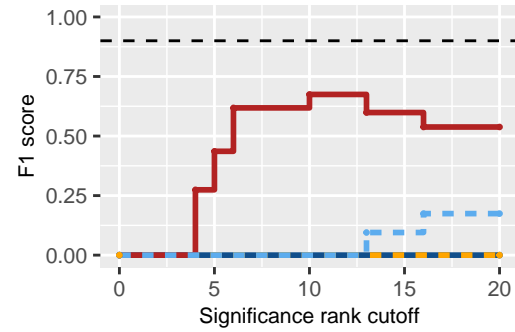

MBCOL2 – Cardiotoxicity  
Signaling pathways  
regulating water homeostasis

MBCOL2 – Cardiotoxicity  
Signaling pathways  
regulating water homeostasis

MBCOL2 – Cardiotoxicity  
Signaling pathways  
regulating water homeostasis

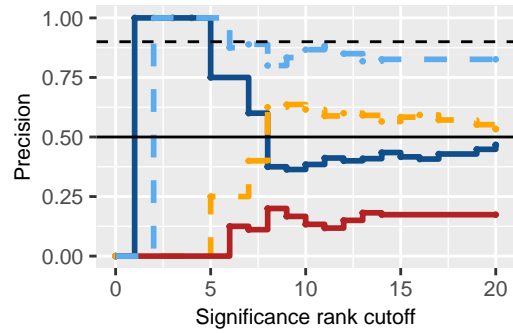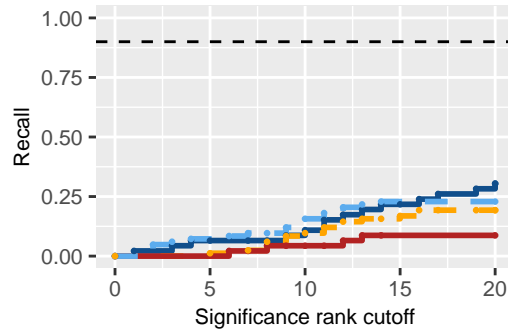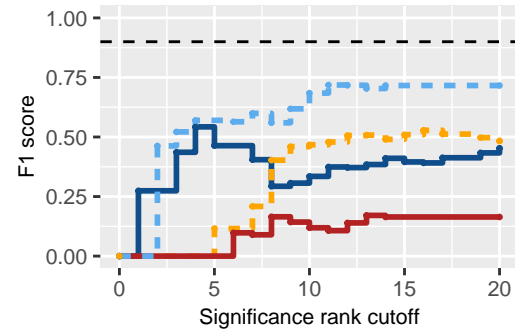

MBCOL3 – Cardiotoxicity  
Adrenergic receptor signaling

MBCOL3 – Cardiotoxicity  
Adrenergic receptor signaling

MBCOL3 – Cardiotoxicity  
Adrenergic receptor signaling

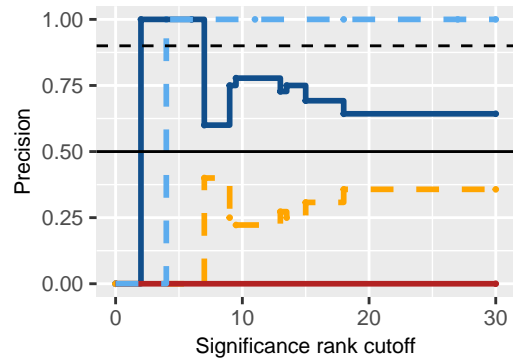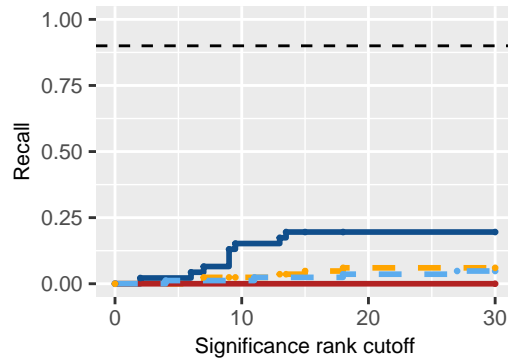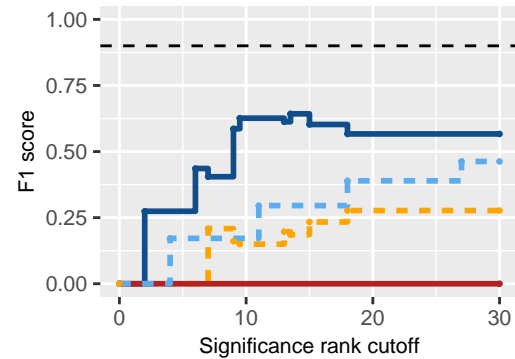

MBCOL3 – Cardiotoxicity  
Amyloid degradation, uptake  
and aggregation inhibition

MBCOL3 – Cardiotoxicity  
Amyloid degradation, uptake  
and aggregation inhibition

MBCOL3 – Cardiotoxicity  
Amyloid degradation, uptake  
and aggregation inhibition

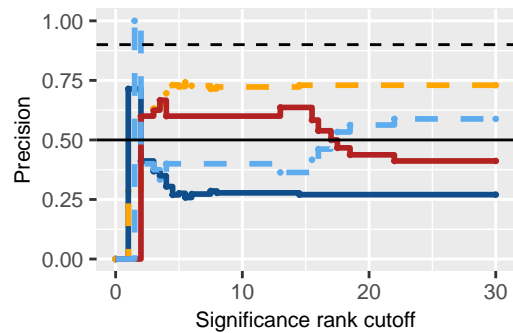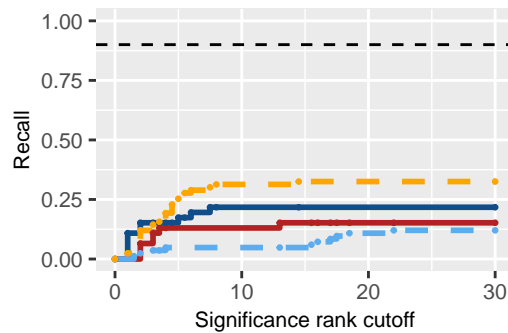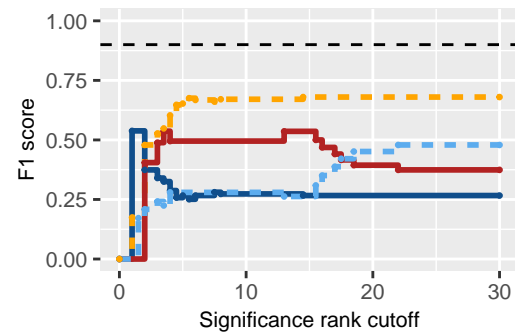

MBCOL3 – Cardiotoxicity  
Aspartate and  
arginine metabolism

MBCOL3 – Cardiotoxicity  
Aspartate and  
arginine metabolism

MBCOL3 – Cardiotoxicity  
Aspartate and  
arginine metabolism

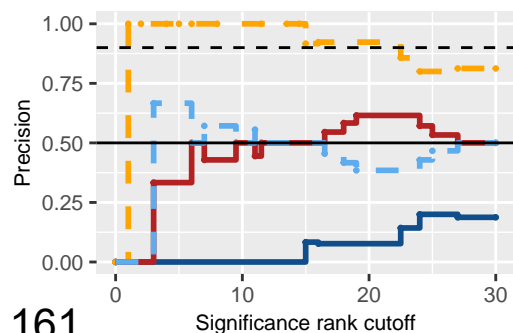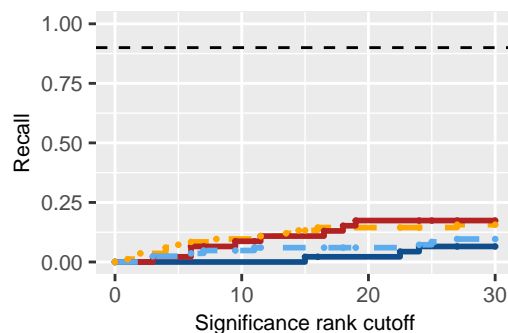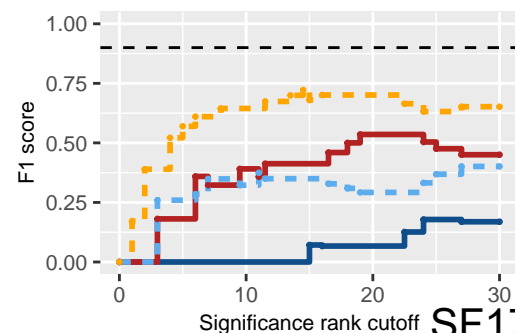



MBCOL3 – Cardiotoxicity  
Cholesterol-sensitive  
control of SREBP activation

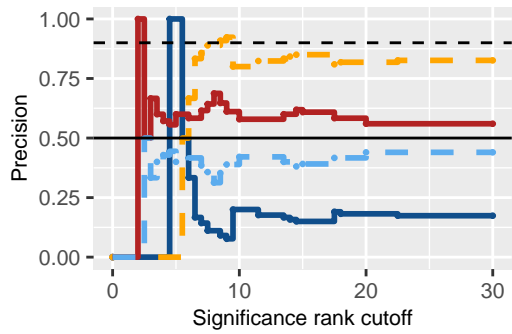

MBCOL3 – Cardiotoxicity  
Cholesterol-sensitive  
control of SREBP activation

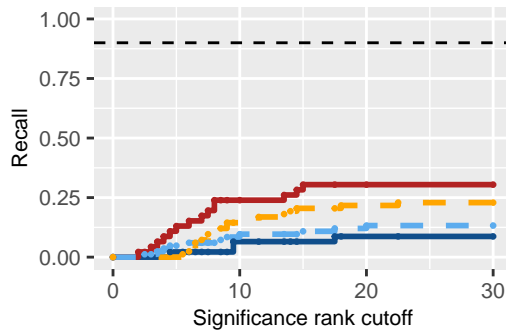

MBCOL3 – Cardiotoxicity  
Cholesterol-sensitive  
control of SREBP activation

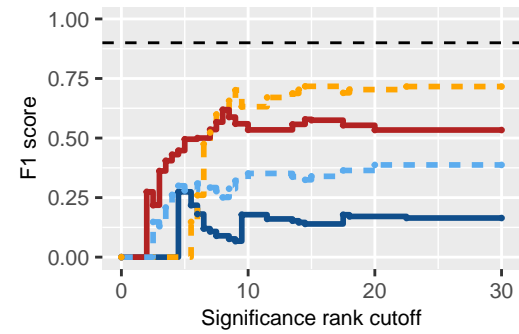

MBCOL3 – Cardiotoxicity  
Cholesterol synthesis

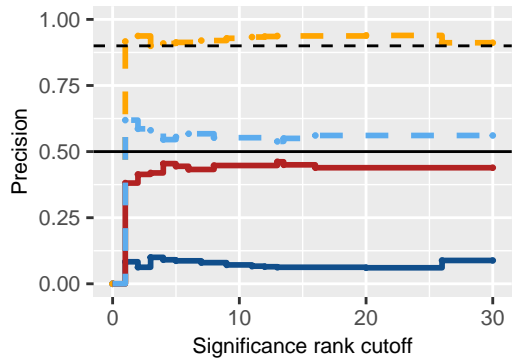

MBCOL3 – Cardiotoxicity  
Cholesterol synthesis

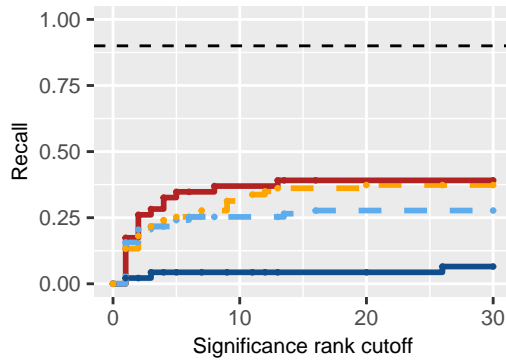

MBCOL3 – Cardiotoxicity  
Cholesterol synthesis

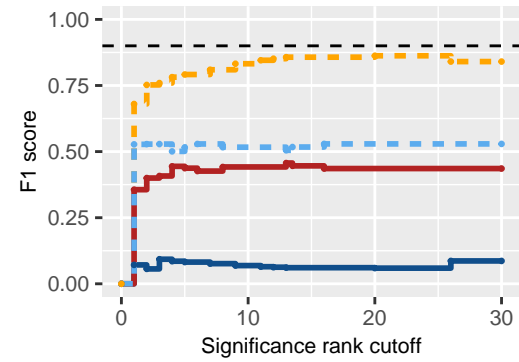

MBCOL3 – Cardiotoxicity  
Citric acid cycle

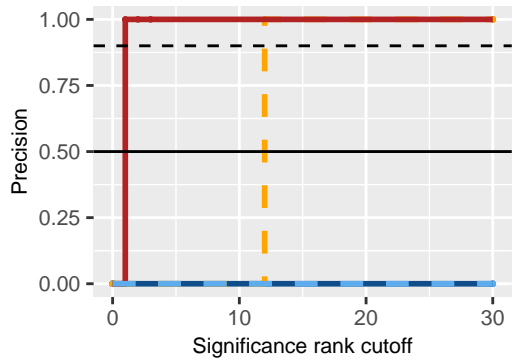

MBCOL3 – Cardiotoxicity  
Citric acid cycle

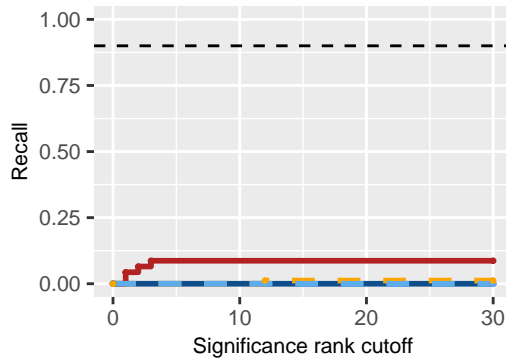

MBCOL3 – Cardiotoxicity  
Citric acid cycle

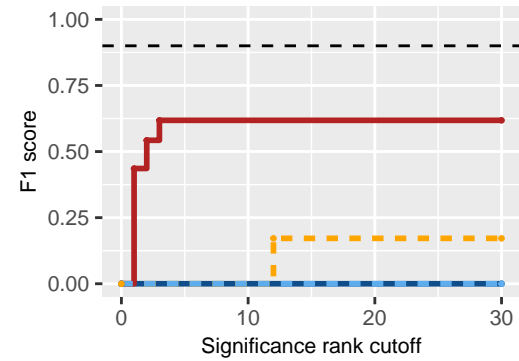

MBCOL3 – Cardiotoxicity  
Collagen fiber crosslinking

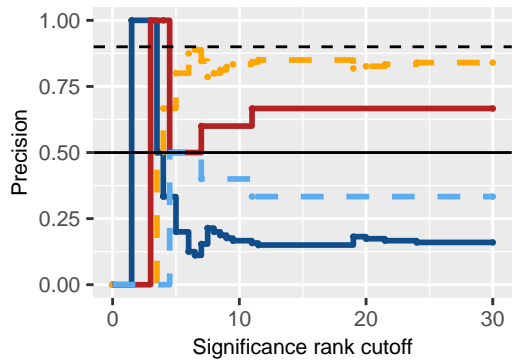

MBCOL3 – Cardiotoxicity  
Collagen fiber crosslinking

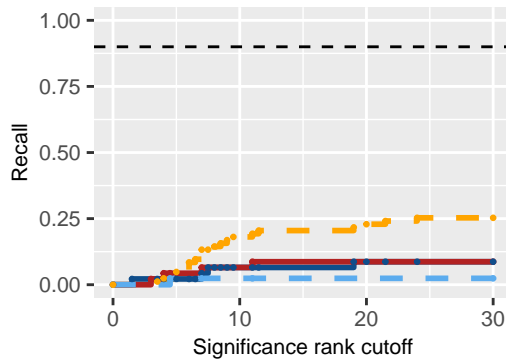

MBCOL3 – Cardiotoxicity  
Collagen fiber crosslinking

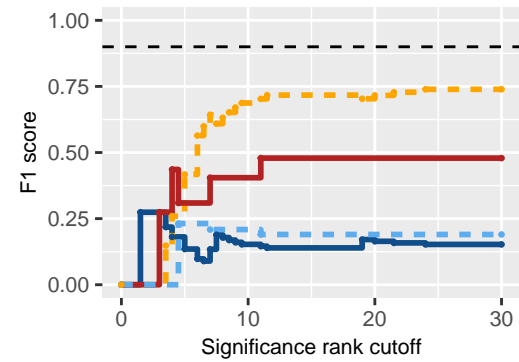

MBCOL3 – Cardiotoxicity  
Collagen fibril organization  
by fibril-associated bridges

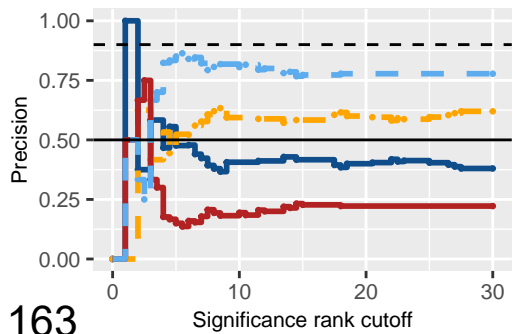

MBCOL3 – Cardiotoxicity  
Collagen fibril organization  
by fibril-associated bridges

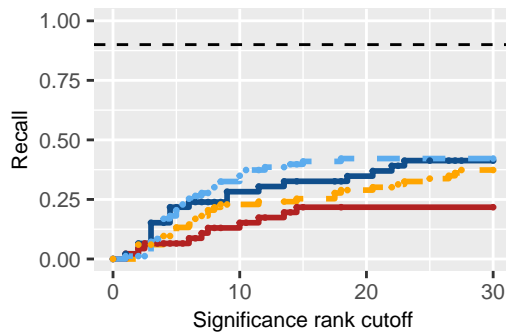

MBCOL3 – Cardiotoxicity  
Collagen fibril organization  
by fibril-associated bridges

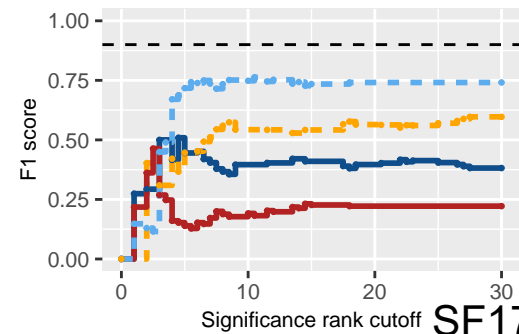

MBCOL3 – Cardiotoxicity  
Desaturation of fatty acids

MBCOL3 – Cardiotoxicity  
Desaturation of fatty acids

MBCOL3 – Cardiotoxicity  
Desaturation of fatty acids

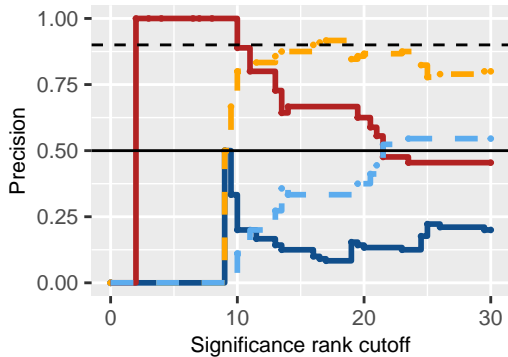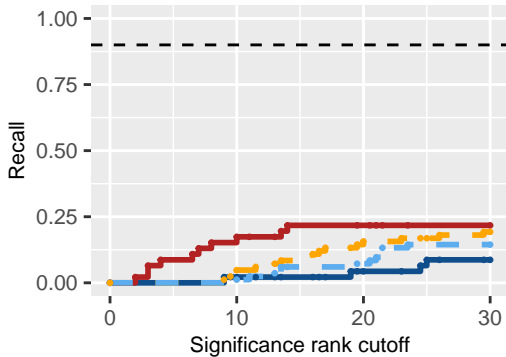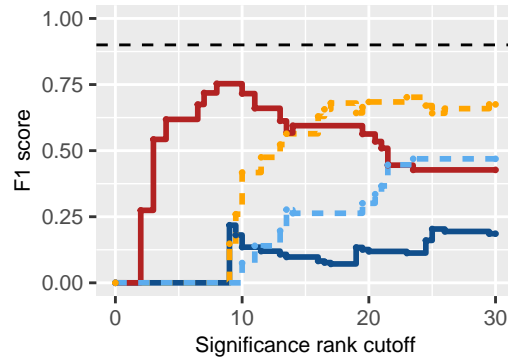

MBCOL3 – Cardiotoxicity  
Elastin cross-linking  
and assembly

MBCOL3 – Cardiotoxicity  
Elastin cross-linking  
and assembly

MBCOL3 – Cardiotoxicity  
Elastin cross-linking  
and assembly

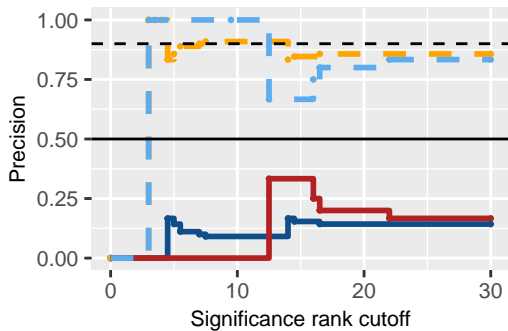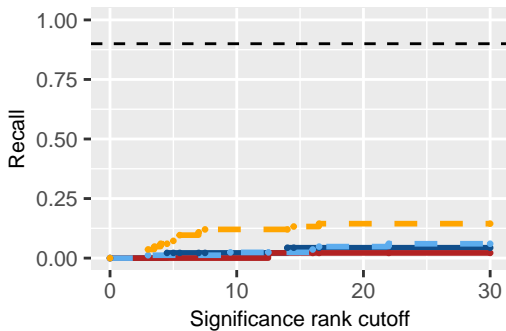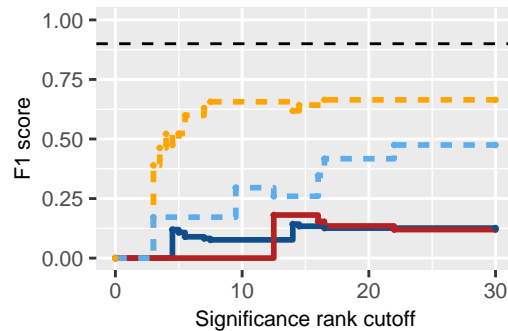

MBCOL3 – Cardiotoxicity  
Epithelial intermediate  
filament dynamics

MBCOL3 – Cardiotoxicity  
Epithelial intermediate  
filament dynamics

MBCOL3 – Cardiotoxicity  
Epithelial intermediate  
filament dynamics

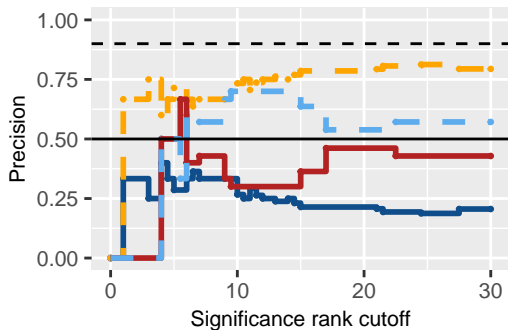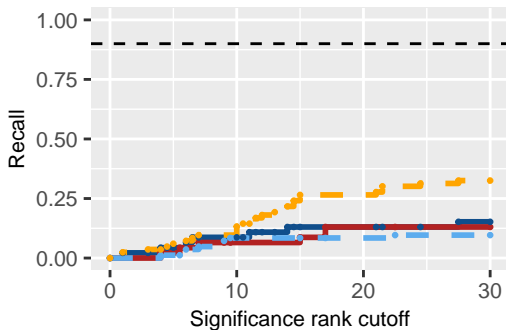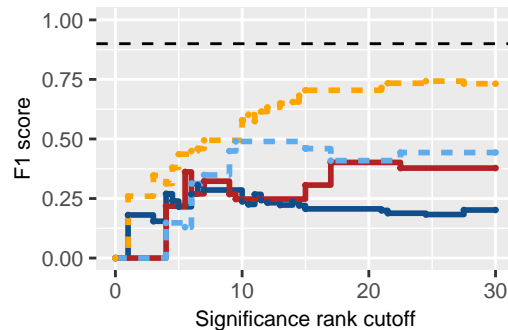

MBCOL3 – Cardiotoxicity  
GABA metabolism

MBCOL3 – Cardiotoxicity  
GABA metabolism

MBCOL3 – Cardiotoxicity  
GABA metabolism

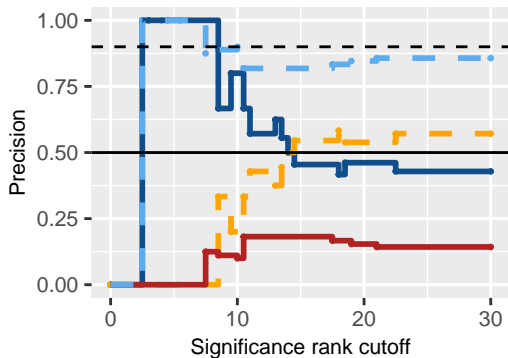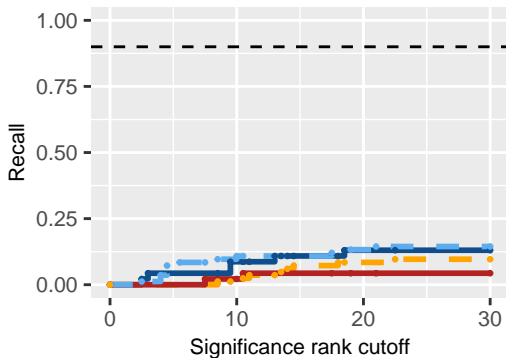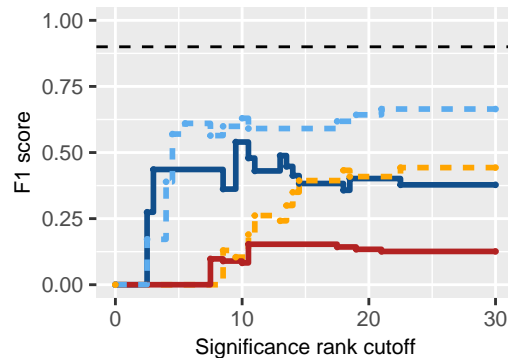

MBCOL3 – Cardiotoxicity  
Gap junction organization

MBCOL3 – Cardiotoxicity  
Gap junction organization

MBCOL3 – Cardiotoxicity  
Gap junction organization

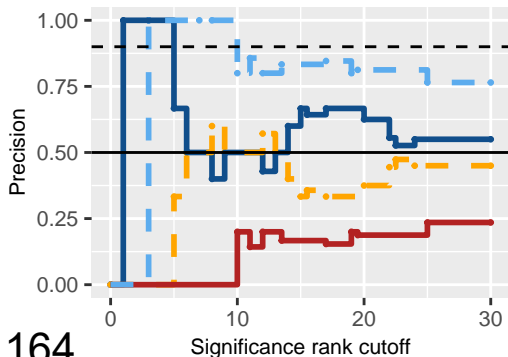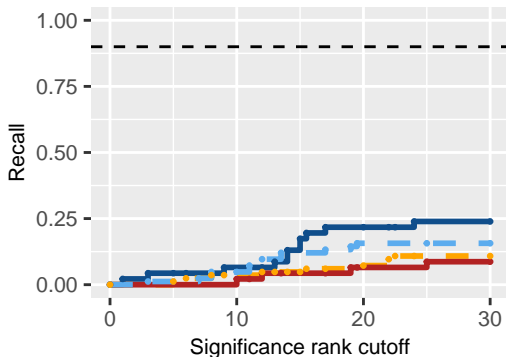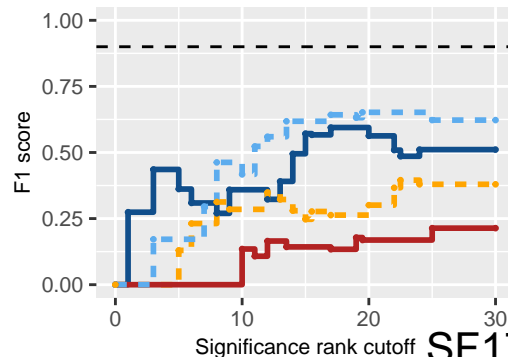

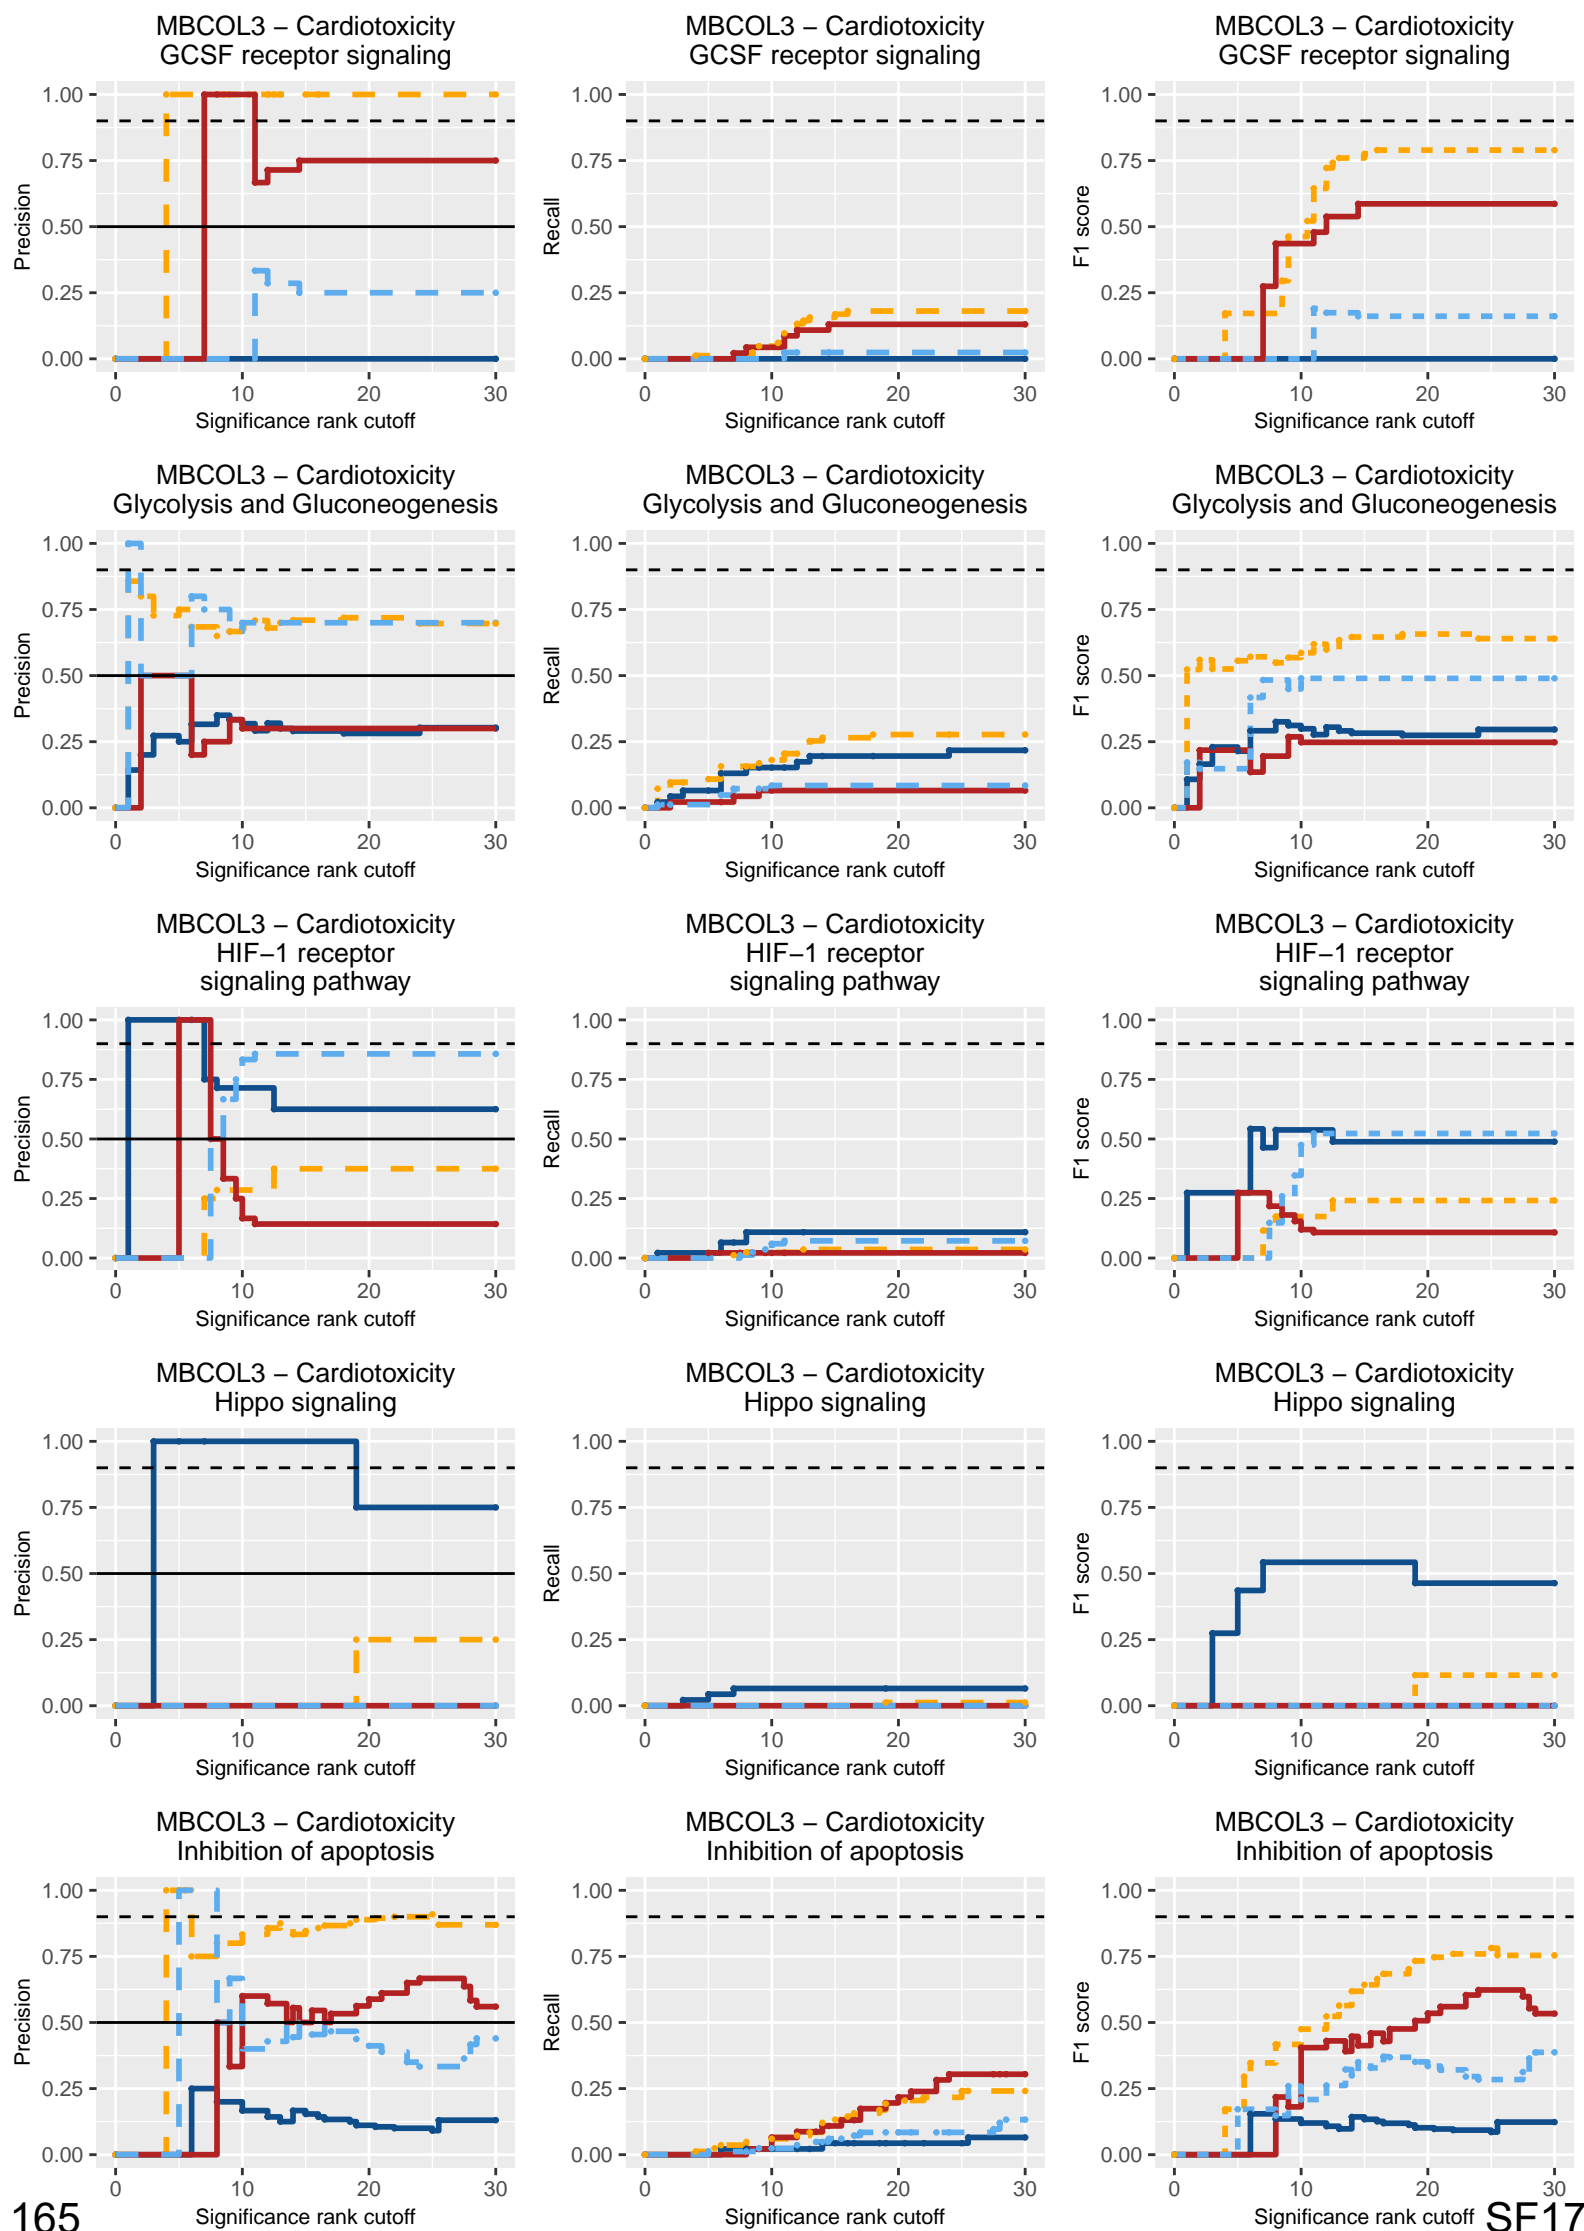

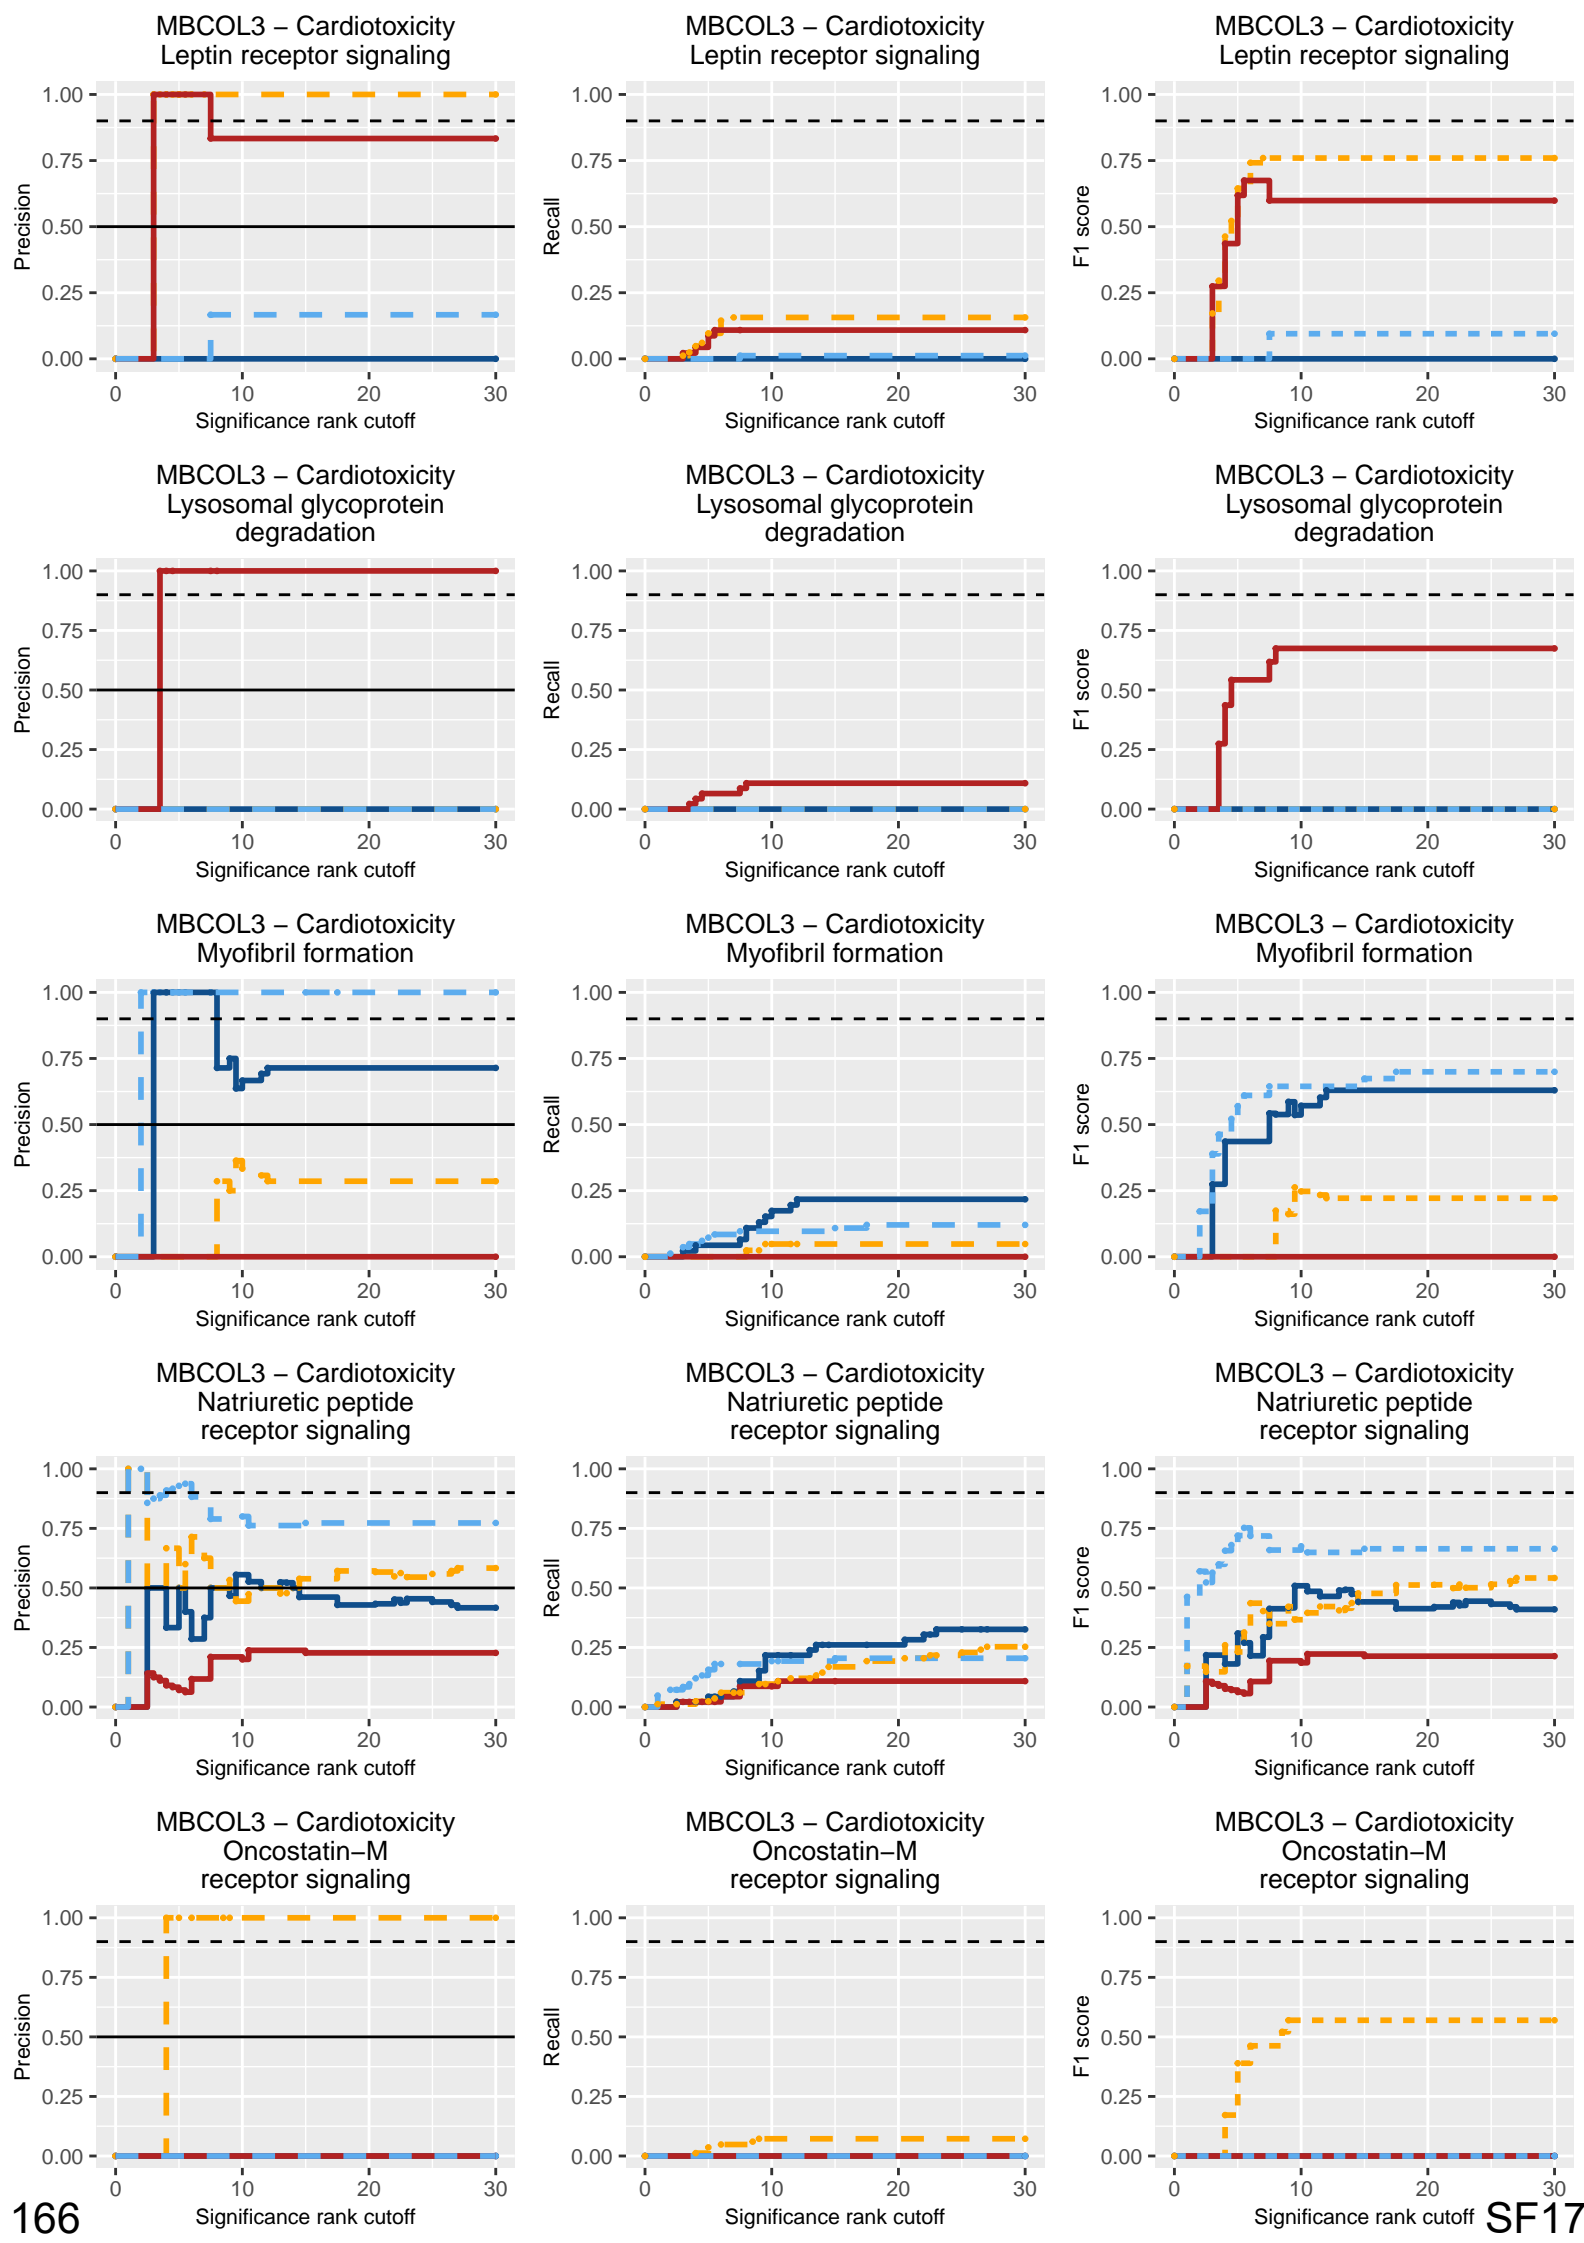

MBCOL3 – Cardiotoxicity  
PDGF receptor signaling

MBCOL3 – Cardiotoxicity  
PDGF receptor signaling

MBCOL3 – Cardiotoxicity  
PDGF receptor signaling

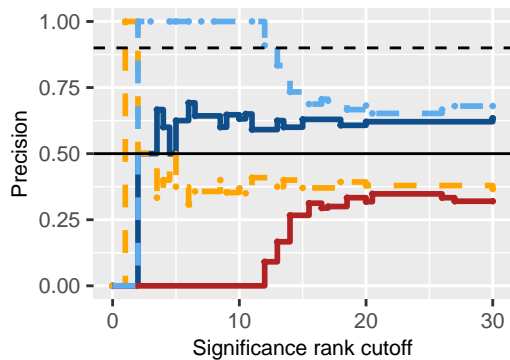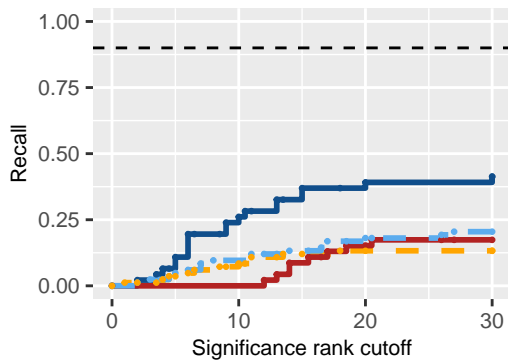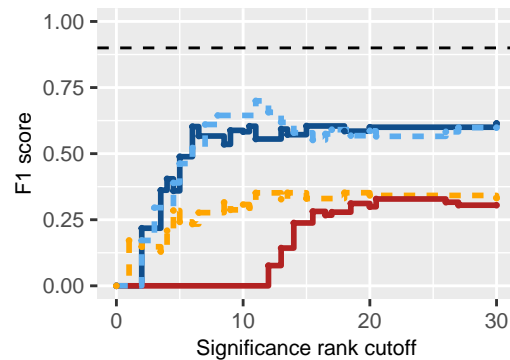

MBCOL3 – Cardiotoxicity  
Polyol pathway

MBCOL3 – Cardiotoxicity  
Polyol pathway

MBCOL3 – Cardiotoxicity  
Polyol pathway

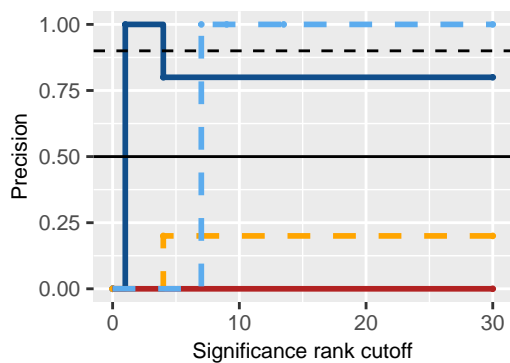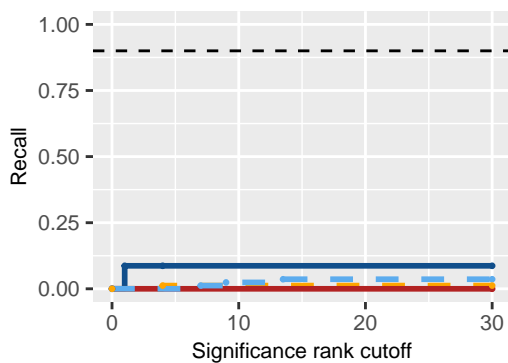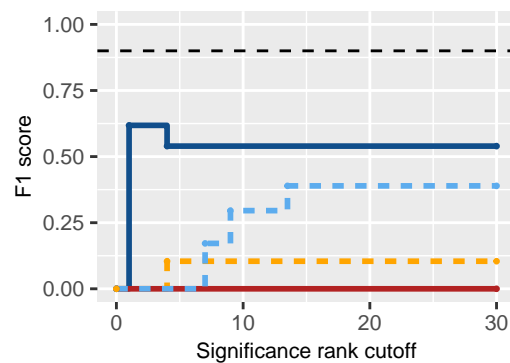

MBCOL3 – Cardiotoxicity  
Potassium TM transport

MBCOL3 – Cardiotoxicity  
Potassium TM transport

MBCOL3 – Cardiotoxicity  
Potassium TM transport

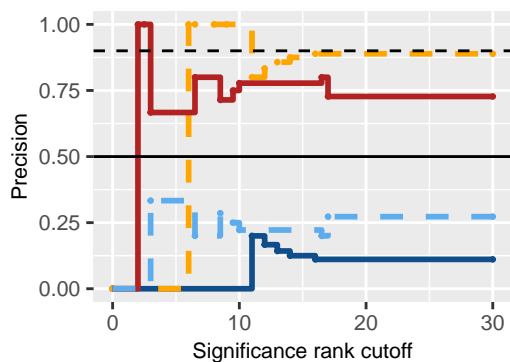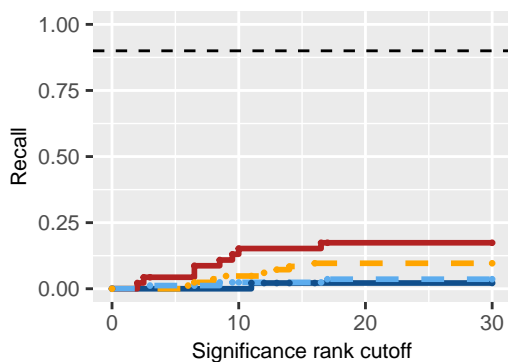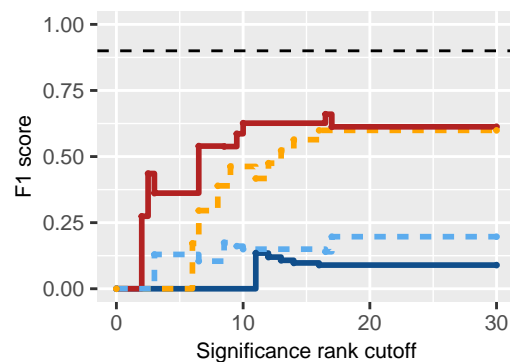

MBCOL3 – Cardiotoxicity  
Prostaglandin E2  
receptor signaling

MBCOL3 – Cardiotoxicity  
Prostaglandin E2  
receptor signaling

MBCOL3 – Cardiotoxicity  
Prostaglandin E2  
receptor signaling

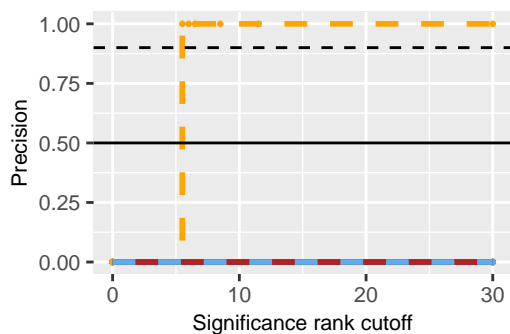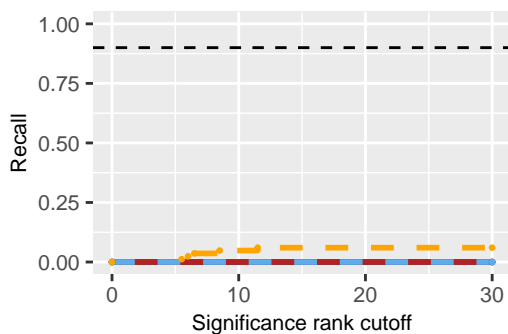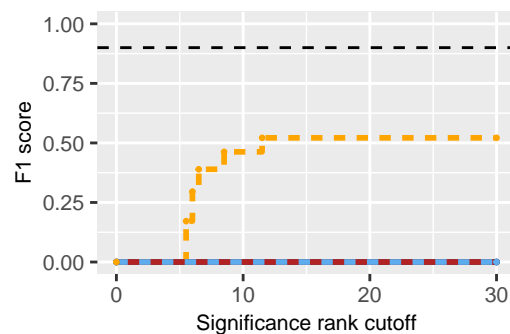

MBCOL3 – Cardiotoxicity  
Restriction point

MBCOL3 – Cardiotoxicity  
Restriction point

MBCOL3 – Cardiotoxicity  
Restriction point

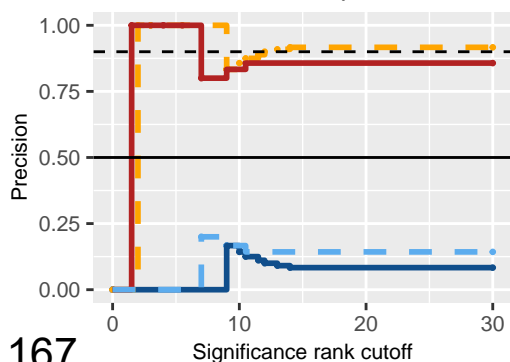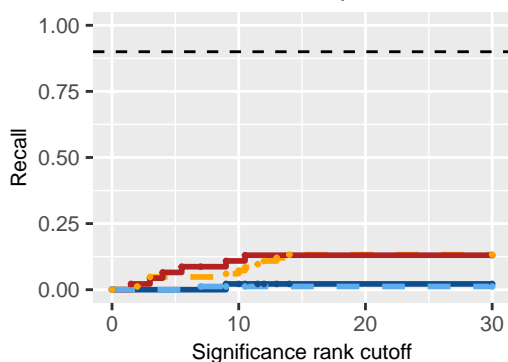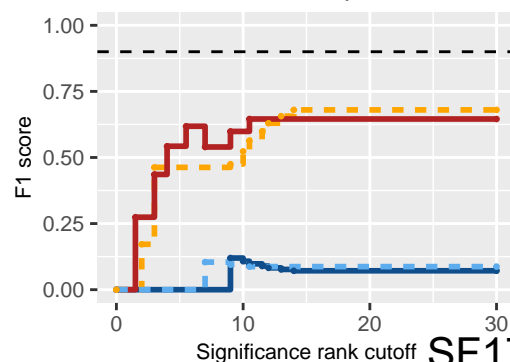





MBCOL3 – Cardiotoxicity  
Water TM transport

MBCOL3 – Cardiotoxicity  
Water TM transport

MBCOL3 – Cardiotoxicity  
Water TM transport

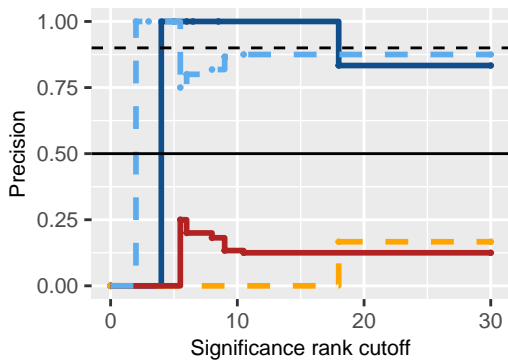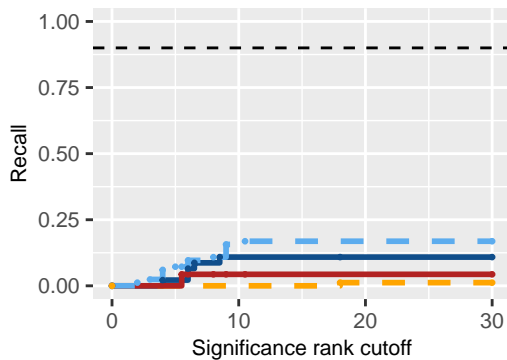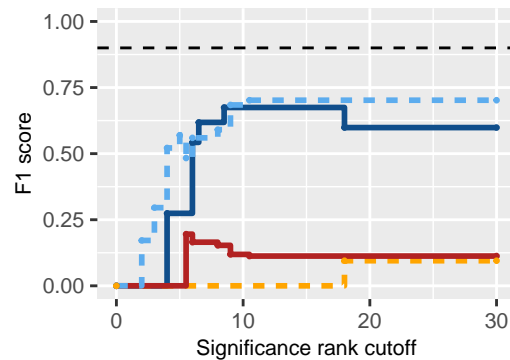

MBCOL4 – Cardiotoxicity  
Actin filament  
depolymerization

MBCOL4 – Cardiotoxicity  
Actin filament  
depolymerization

MBCOL4 – Cardiotoxicity  
Actin filament  
depolymerization

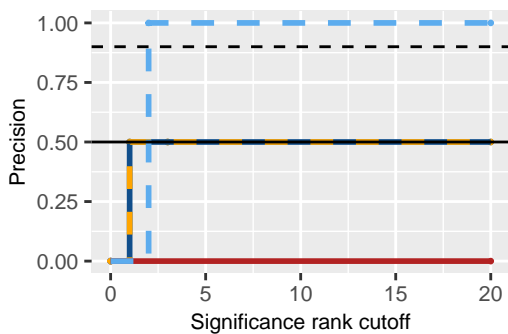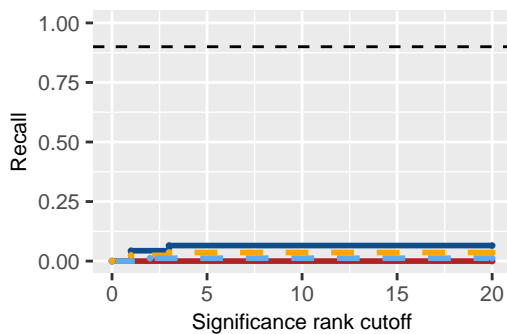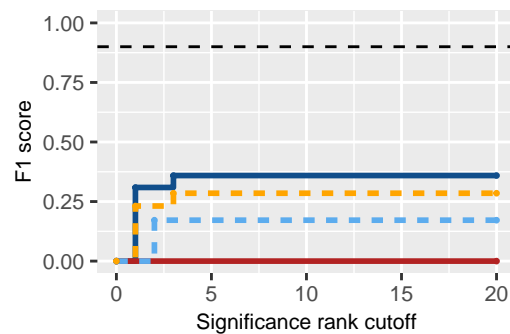

MBCOL4 – Cardiotoxicity  
Apoptosis initiator  
caspase cascade

MBCOL4 – Cardiotoxicity  
Apoptosis initiator  
caspase cascade

MBCOL4 – Cardiotoxicity  
Apoptosis initiator  
caspase cascade

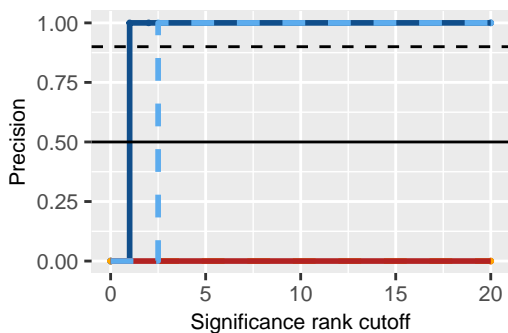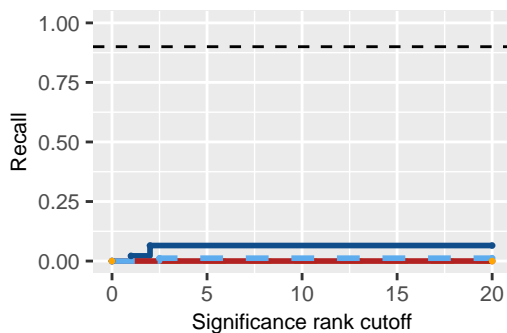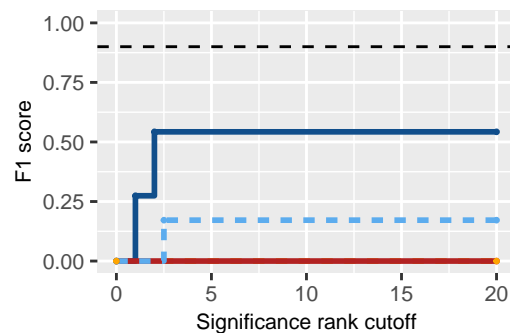

MBCOL4 – Cardiotoxicity  
Atrial natriuretic peptide  
receptor signaling

MBCOL4 – Cardiotoxicity  
Atrial natriuretic peptide  
receptor signaling

MBCOL4 – Cardiotoxicity  
Atrial natriuretic peptide  
receptor signaling

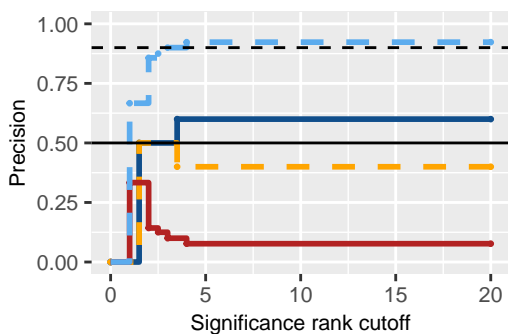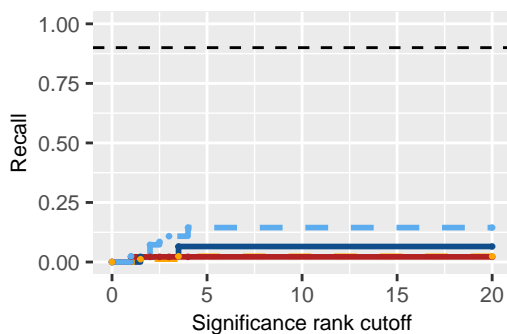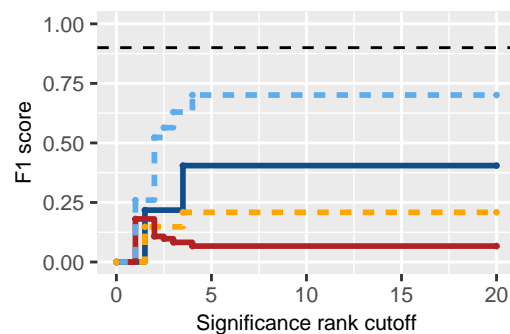

MBCOL4 – Cardiotoxicity  
Brain natriuretic peptide  
receptor signaling

MBCOL4 – Cardiotoxicity  
Brain natriuretic peptide  
receptor signaling

MBCOL4 – Cardiotoxicity  
Brain natriuretic peptide  
receptor signaling

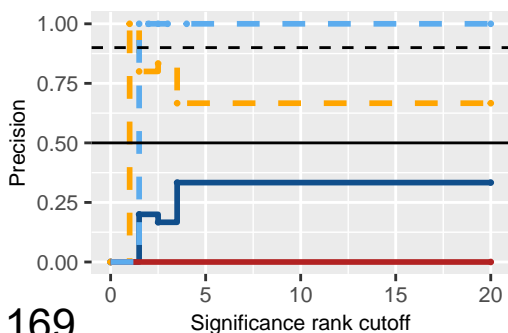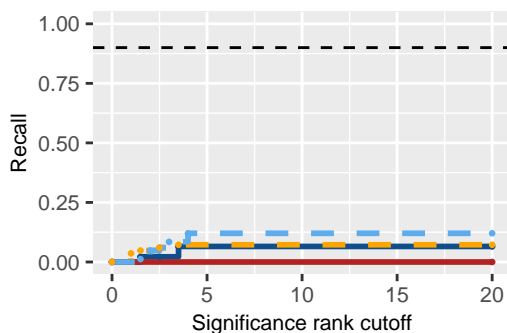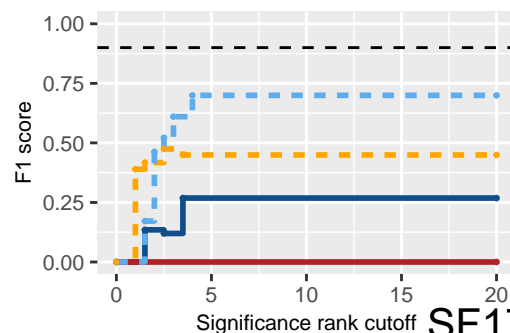



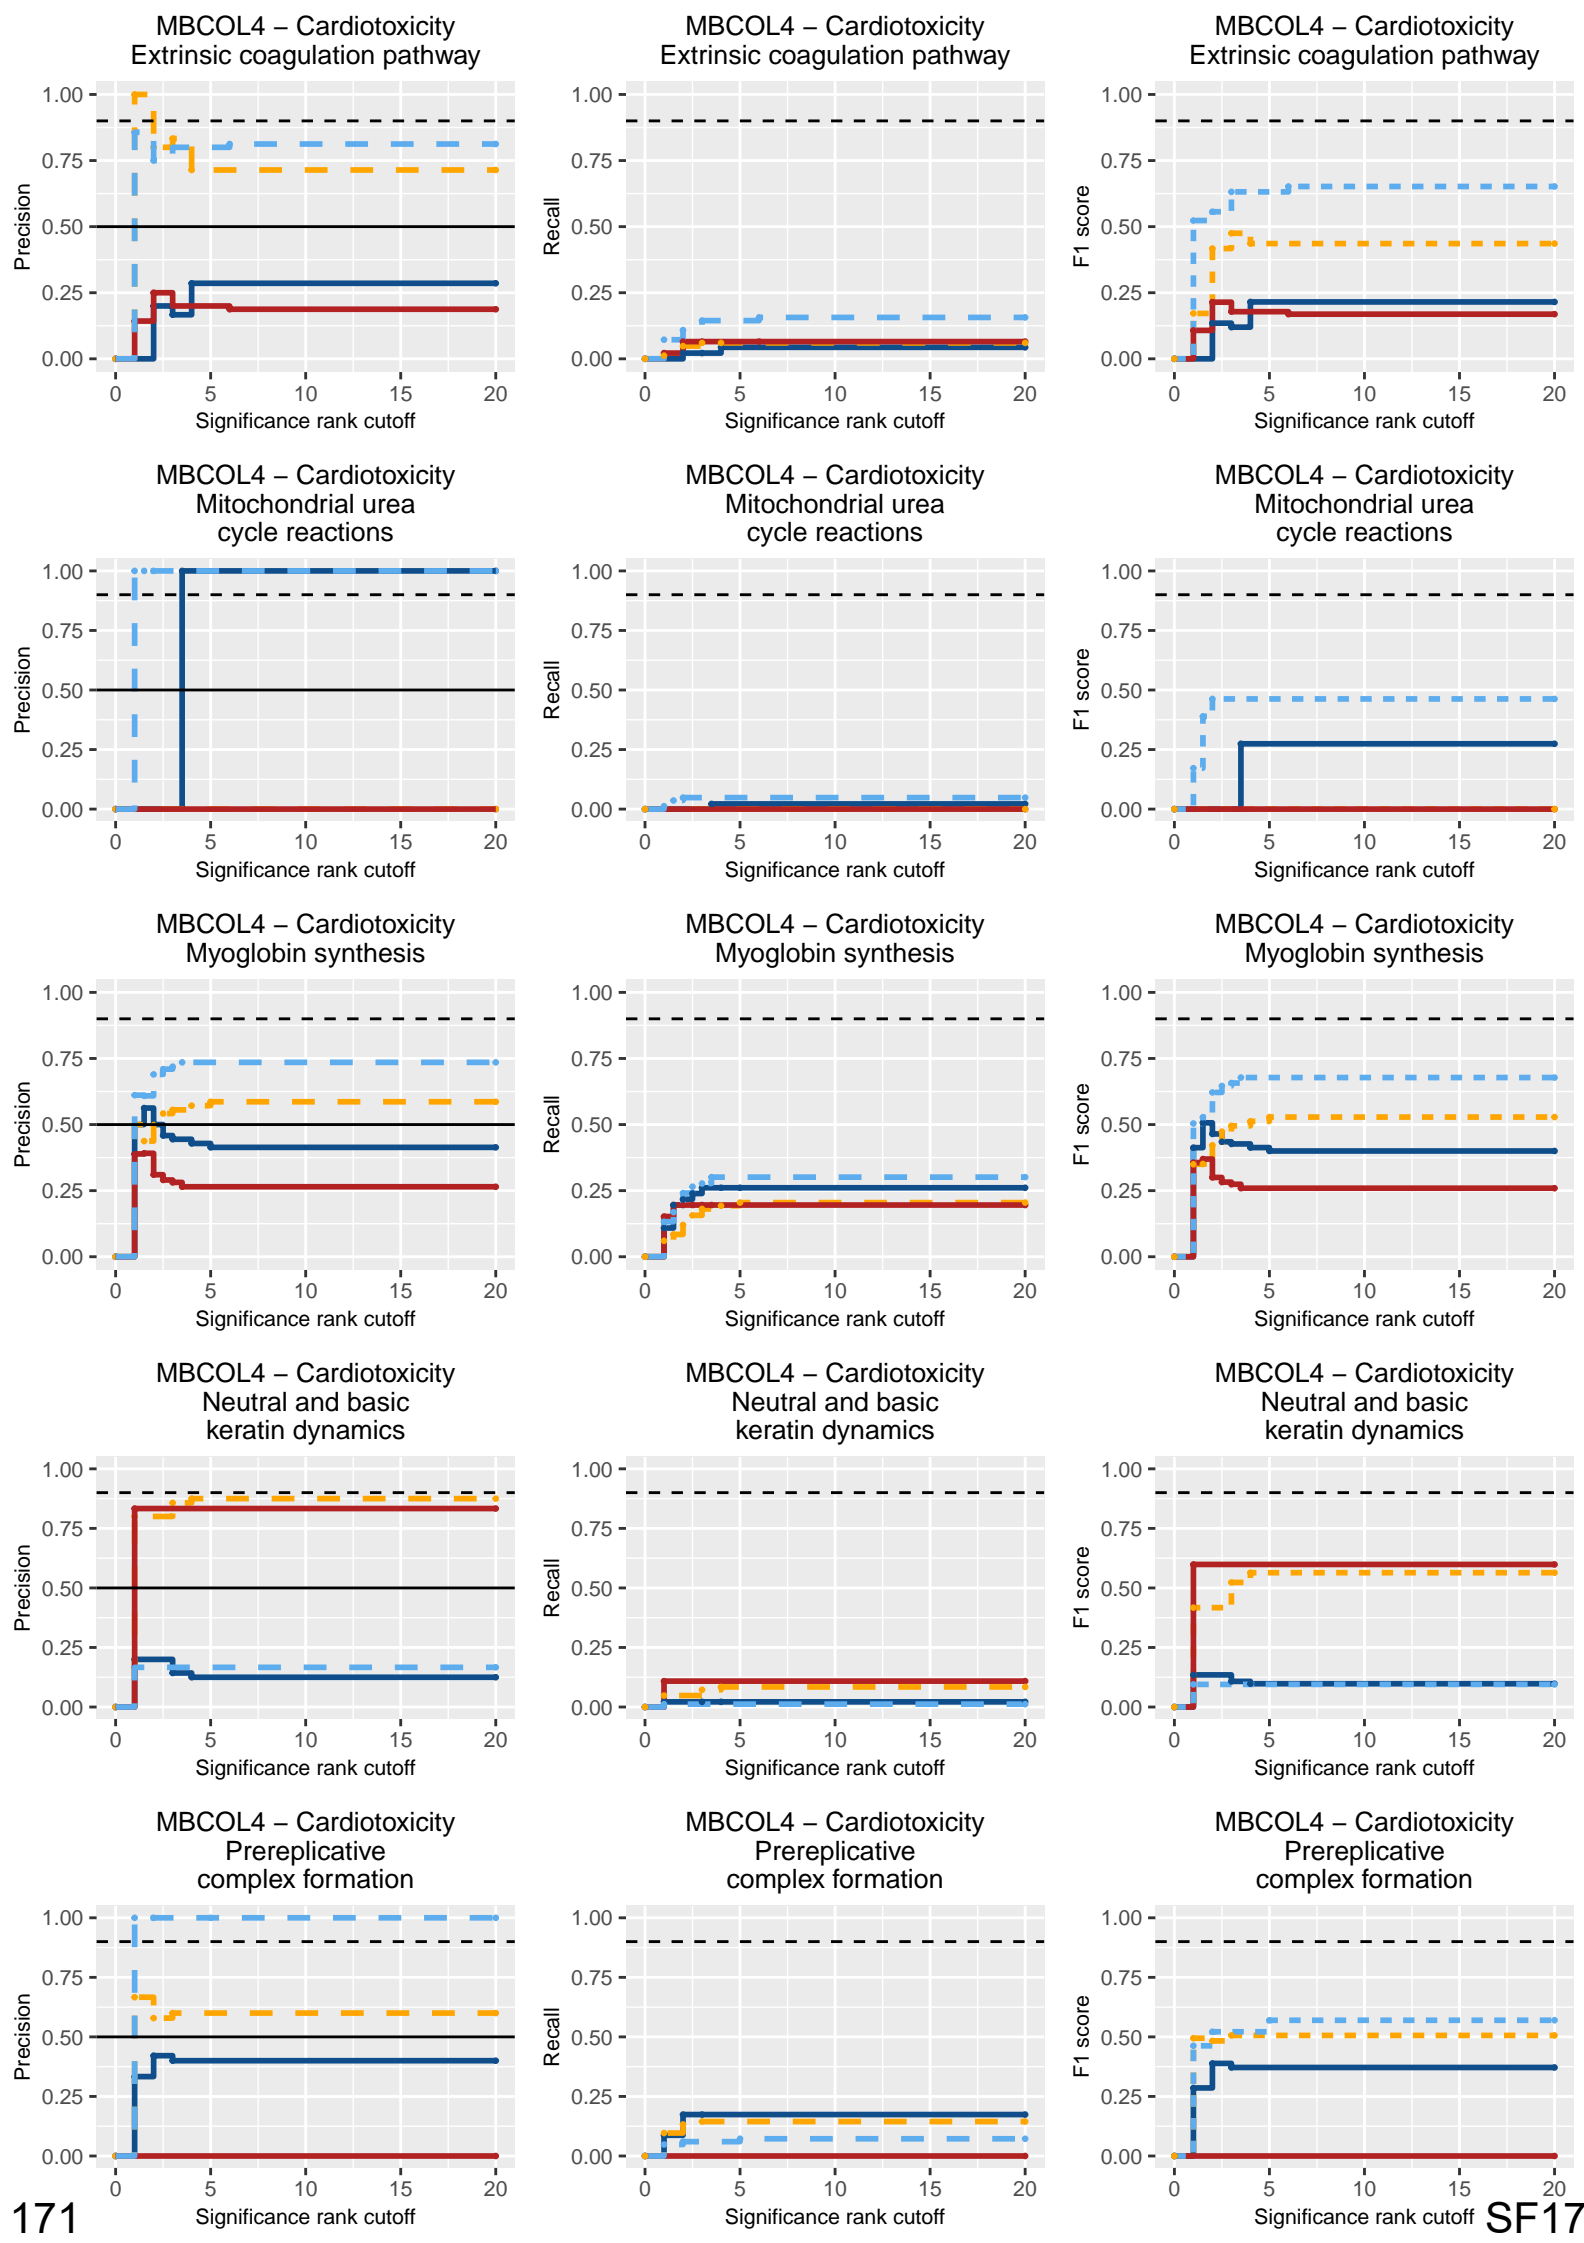

MBCOL4 – Cardiotoxicity  
Triacylglycerol transport  
by chylomicrons

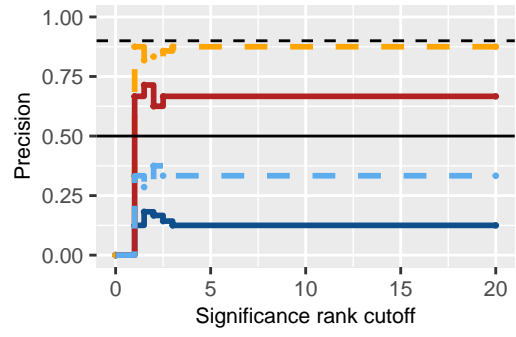

MBCOL4 – Cardiotoxicity  
Triacylglycerol transport  
by chylomicrons

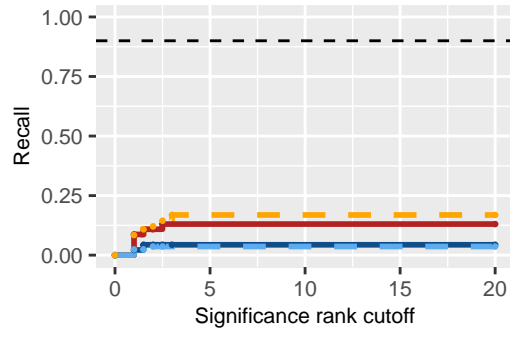

MBCOL4 – Cardiotoxicity  
Triacylglycerol transport  
by chylomicrons

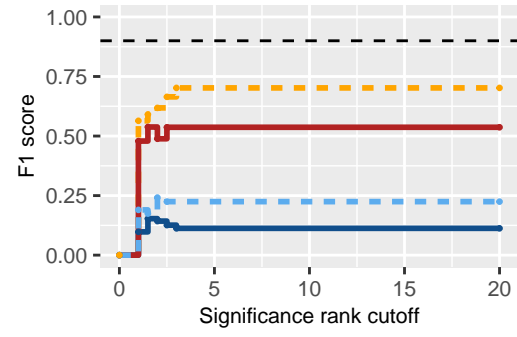

**Supplementary Figure 17.** F1 score and Area under the Curve statistics. At each significance rank cutoff we counted how many cardiotoxic or non-cardiotoxic TKIs up- or down-regulate a particular SCP with a significance rank below or equal to the current cutoff. Results were used to calculate precision, recall and F1 score (beta = 0.2) of each SCP at each rank to be either up- or downregulated by either the cardiotoxic or noncardiotoxic drugs. Shown are the results for the SCPs that our algorithm selected to be associated with a cardiotoxic or non-cardiotoxic response. See methods for description of the algorithm. Solid lines indicate results for the SCP, if up- (red) or downregulated (dark blue) by cardiotoxic TKIs, dashed lines indicate results for the SCP, if up- (light blue) or downregulated (orange) by non-cardiotoxic TKIs. Color combinations were selected to indicate if the higher (red, orange) or lower (dark blue, light blue) activity of an SCP favors a cardiotoxic response.

# MBCOL1 dabrafenib (is c.toxic: yes)

## Upregulated

## Downregulated

complete

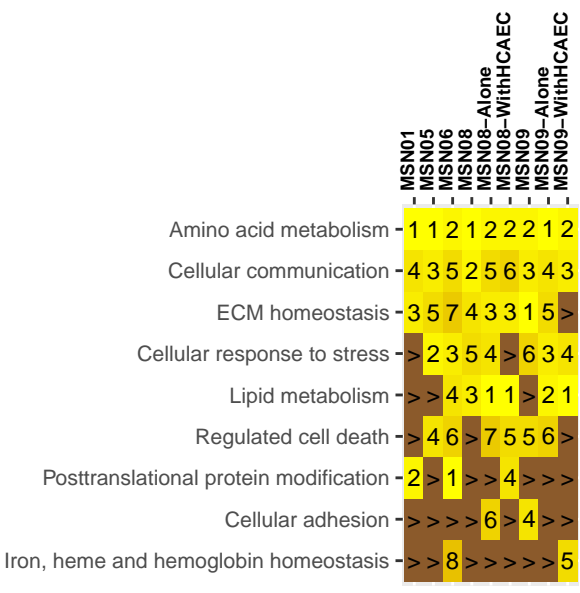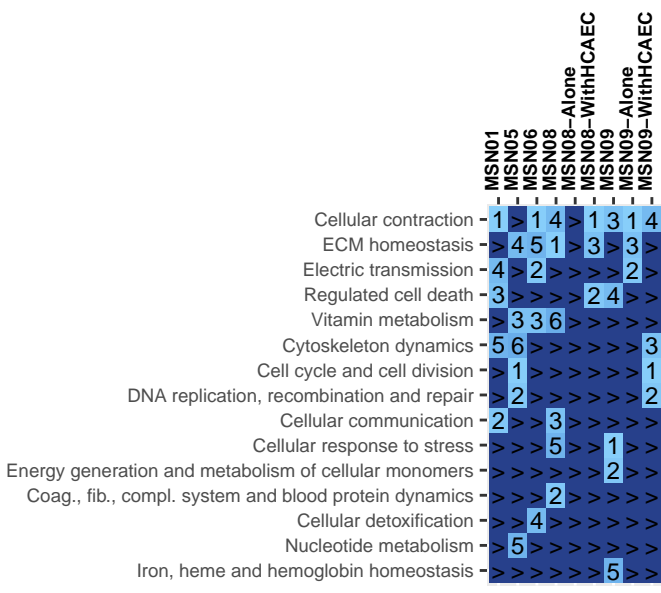

no1stSVD

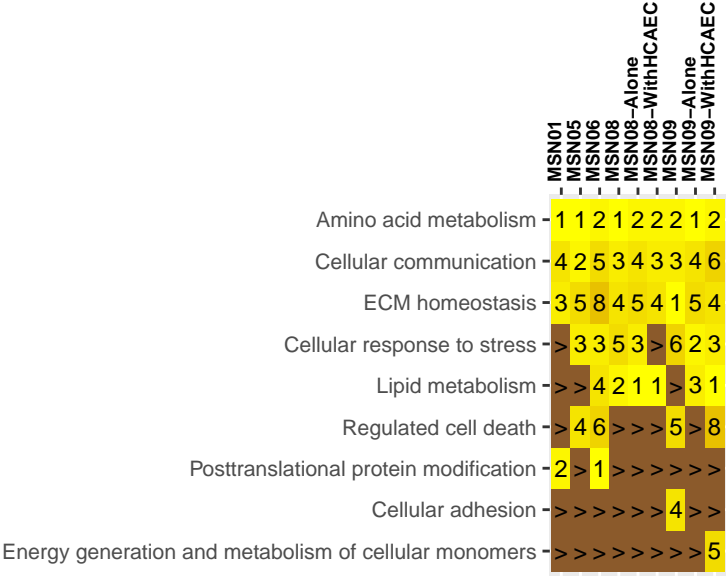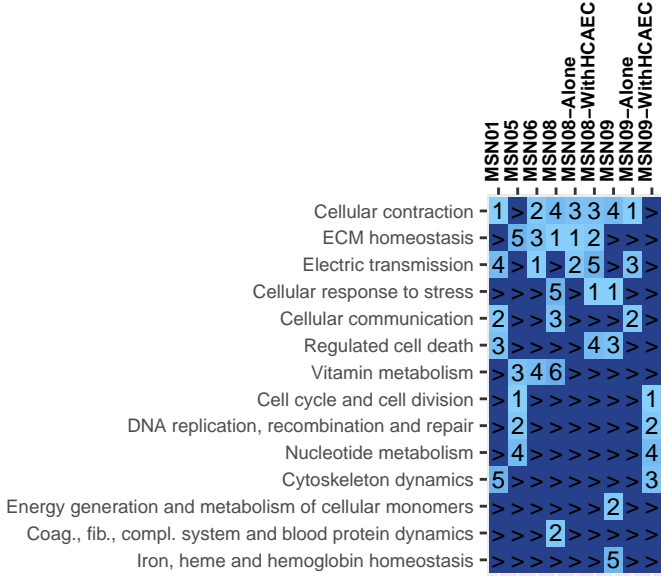

decomposed

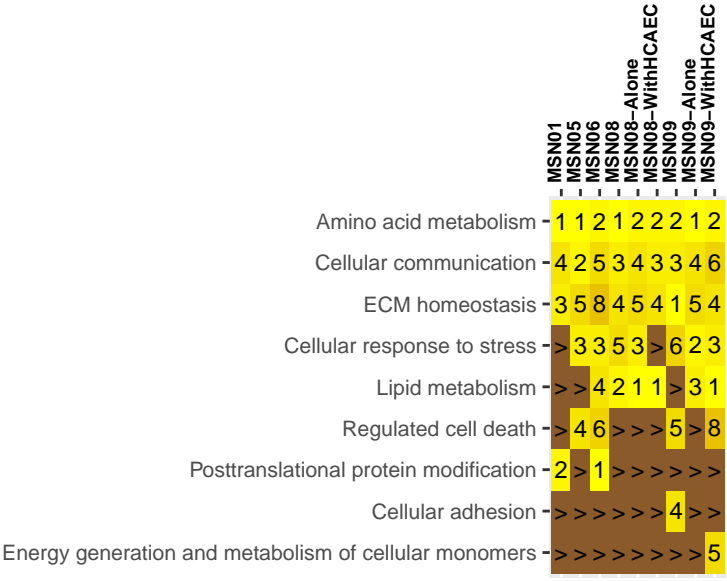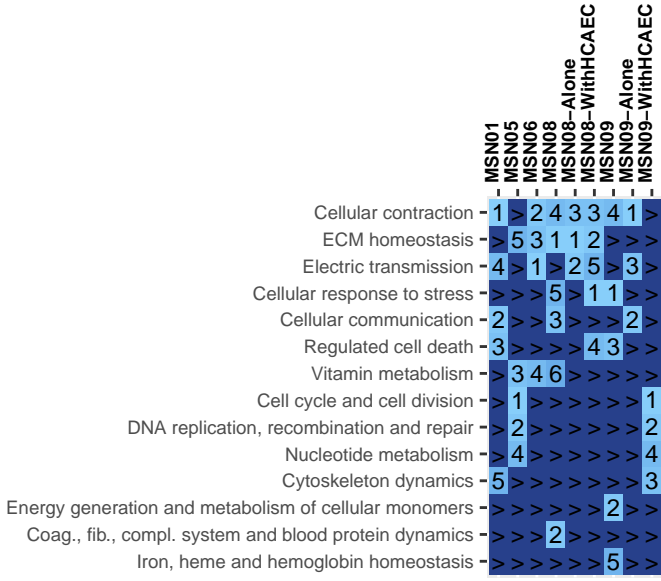

**MBCOL1**  
**pazopanib**  
(is c.toxic: yes)

**Upregulated**

**Downregulated**

**complete**

|                                                       | MSN01 | MSN05 | MSN06 | MSN08 | MSN08-<br>Alone | MSN08-<br>WithHCAEC | MSN09 | MSN09-<br>Alone | MSN09-<br>WithHCAEC |
|-------------------------------------------------------|-------|-------|-------|-------|-----------------|---------------------|-------|-----------------|---------------------|
| Lipid metabolism                                      | 4     | 4     | 1     | 1     | 1               | 1                   | 3     | 1               | 1                   |
| Energy generation and metabolism of cellular monomers | 1     | 1     | 4     | 2     | 2               | 2                   | 3     | 3               | 3                   |
| Amino acid metabolism                                 | 2     | 2     | 2     | 3     | 3               | 3                   | 2     | 2               | 2                   |
| Cellular response to stress                           | 3     | 7     | 4     | 7     | 4               | 7                   | 4     | 4               | 4                   |
| Cell cycle and cell division                          | >     | >     | >     | >     | >               | >                   | 1     | 2               | 1                   |
| Nucleotide metabolism                                 | >     | >     | >     | >     | >               | 4                   | 5     | 3               | 5                   |
| DNA replication, recombination and repair             | >     | >     | >     | >     | >               | >                   | 4     | 2               | 2                   |
| ECM homeostasis                                       | 5     | 3     | >     | >     | >               | >                   | >     | >               | >                   |
| Cellular redox homeostasis                            | >     | 3     | >     | >     | >               | >                   | >     | >               | >                   |
| Electric transmission                                 | >     | >     | >     | 4     | >               | >                   | >     | >               | >                   |
| Intracellular degradation pathways                    | >     | 5     | >     | >     | >               | >                   | >     | >               | >                   |

|                                                       | MSN01 | MSN05 | MSN06 | MSN08 | MSN08-<br>Alone | MSN08-<br>WithHCAEC | MSN09 | MSN09-<br>Alone | MSN09-<br>WithHCAEC |
|-------------------------------------------------------|-------|-------|-------|-------|-----------------|---------------------|-------|-----------------|---------------------|
| Cellular communication                                | 1     | 2     | 1     | 1     | 3               | 4                   | 2     | 2               | 4                   |
| Cellular adhesion                                     | 2     | 3     | 4     | 4     | 2               | 6                   | 4     | 4               | 7                   |
| ECM homeostasis                                       | >     | 1     | 2     | 2     | 1               | 1                   | 5     | 1               | 1                   |
| Cellular response to stress                           | 3     | 6     | 6     | >     | >               | 2                   | 1     | 3               | 2                   |
| Cellular contraction                                  | >     | >     | >     | 5     | 4               | 5                   | 3     | 5               | 5                   |
| Cytoskeleton dynamics                                 | >     | 7     | 3     | >     | >               | 7                   | >     | >               | >                   |
| Energy generation and metabolism of cellular monomers | >     | >     | >     | >     | >               | 3                   | >     | 3               | 3                   |
| Electric transmission                                 | >     | 5     | 3     | >     | >               | >                   | >     | >               | >                   |
| Regulated cell death                                  | 4     | >     | >     | >     | >               | 6                   | >     | >               | >                   |
| Amino acid metabolism                                 | >     | 5     | >     | >     | >               | >                   | >     | 8               | >                   |
| Vitamin metabolism                                    | >     | 4     | >     | >     | >               | >                   | >     | >               | >                   |

**no1stSVD**

|                                                       | MSN01 | MSN05 | MSN06 | MSN08 | MSN08-<br>Alone | MSN08-<br>WithHCAEC | MSN09 | MSN09-<br>Alone | MSN09-<br>WithHCAEC |
|-------------------------------------------------------|-------|-------|-------|-------|-----------------|---------------------|-------|-----------------|---------------------|
| Lipid metabolism                                      | 4     | 3     | 1     | 1     | 2               | 2                   | 1     | 2               | >                   |
| Energy generation and metabolism of cellular monomers | 1     | 1     | 4     | 2     | 1               | 3                   | 3     | 4               | >                   |
| Amino acid metabolism                                 | 2     | 2     | 2     | 3     | 4               | >                   | 2     | 6               | 5                   |
| Cellular response to stress                           | 3     | 7     | 4     | 3     | 7               | 4                   | 5     | 5               | >                   |
| Cell cycle and cell division                          | >     | >     | >     | >     | 1               | >                   | 1     | 1               | >                   |
| DNA replication, recombination and repair             | >     | >     | >     | >     | 4               | >                   | 3     | 2               | >                   |
| ECM homeostasis                                       | >     | 3     | >     | >     | >               | 4                   | >     | >               | >                   |
| Cellular redox homeostasis                            | 5     | 4     | >     | >     | >               | >                   | >     | >               | >                   |
| Cellular contraction                                  | 7     | >     | >     | 5     | >               | >                   | >     | >               | >                   |
| Nucleotide metabolism                                 | >     | >     | >     | >     | >               | >                   | 3     | >               | >                   |
| Cytoskeleton dynamics                                 | >     | >     | >     | >     | >               | >                   | 4     | >               | >                   |
| Vitamin metabolism                                    | >     | 5     | >     | >     | >               | >                   | >     | >               | >                   |

|                                                       | MSN01 | MSN05 | MSN06 | MSN08 | MSN08-<br>Alone | MSN08-<br>WithHCAEC | MSN09 | MSN09-<br>Alone | MSN09-<br>WithHCAEC |
|-------------------------------------------------------|-------|-------|-------|-------|-----------------|---------------------|-------|-----------------|---------------------|
| Cellular communication                                | 1     | 2     | 1     | 1     | 2               | 4                   | 2     | 2               | 5                   |
| ECM homeostasis                                       | >     | 1     | 2     | 2     | 1               | 1                   | 5     | 1               | 1                   |
| Cellular response to stress                           | 2     | 6     | 6     | >     | >               | 2                   | 1     | 3               | 2                   |
| Regulated cell death                                  | 3     | >     | 5     | 5     | 4               | 5                   | 8     | 8               | 8                   |
| Cellular contraction                                  | >     | >     | 6     | 4     | 3               | 3                   | 4     | 4               | 4                   |
| Cellular adhesion                                     | 4     | 3     | 5     | 4     | 3               | >                   | 7     | >               | >                   |
| Cytoskeleton dynamics                                 | >     | 7     | 4     | 7     | 6               | 7                   | >     | 7               | >                   |
| Amino acid metabolism                                 | >     | 5     | >     | >     | >               | >                   | 6     | 6               | 6                   |
| Electric transmission                                 | >     | 3     | 3     | >     | >               | >                   | >     | >               | >                   |
| Energy generation and metabolism of cellular monomers | >     | >     | >     | >     | 6               | >                   | 3     | 3               | 3                   |
| Vitamin metabolism                                    | >     | 4     | >     | >     | >               | >                   | 8     | 8               | 8                   |

**decomposed**

|                                                       | MSN01 | MSN05 | MSN06 | MSN08 | MSN08-<br>Alone | MSN08-<br>WithHCAEC | MSN09 | MSN09-<br>Alone | MSN09-<br>WithHCAEC |
|-------------------------------------------------------|-------|-------|-------|-------|-----------------|---------------------|-------|-----------------|---------------------|
| Lipid metabolism                                      | 4     | 3     | 1     | 1     | 2               | 2                   | 1     | 2               | >                   |
| Energy generation and metabolism of cellular monomers | 1     | 1     | 4     | 2     | 1               | 3                   | 3     | 4               | >                   |
| Amino acid metabolism                                 | 2     | 2     | 2     | 3     | 4               | >                   | 2     | 6               | 5                   |
| Cellular response to stress                           | 3     | 7     | 4     | 3     | 7               | 4                   | 5     | 5               | >                   |
| Cell cycle and cell division                          | >     | >     | >     | >     | 1               | >                   | 1     | 1               | >                   |
| DNA replication, recombination and repair             | >     | >     | >     | >     | 4               | >                   | 3     | 2               | >                   |
| ECM homeostasis                                       | >     | 3     | >     | >     | >               | 4                   | >     | >               | >                   |
| Cellular redox homeostasis                            | 5     | 4     | >     | >     | >               | >                   | >     | >               | >                   |
| Cellular contraction                                  | 7     | >     | >     | 5     | >               | >                   | >     | >               | >                   |
| Nucleotide metabolism                                 | >     | >     | >     | >     | >               | >                   | 3     | >               | >                   |
| Cytoskeleton dynamics                                 | >     | >     | >     | >     | >               | >                   | 4     | >               | >                   |
| Vitamin metabolism                                    | >     | 5     | >     | >     | >               | >                   | >     | >               | >                   |

|                                                       | MSN01 | MSN05 | MSN06 | MSN08 | MSN08-<br>Alone | MSN08-<br>WithHCAEC | MSN09 | MSN09-<br>Alone | MSN09-<br>WithHCAEC |
|-------------------------------------------------------|-------|-------|-------|-------|-----------------|---------------------|-------|-----------------|---------------------|
| Cellular communication                                | 1     | 2     | 1     | 1     | 2               | 4                   | 2     | 2               | 5                   |
| ECM homeostasis                                       | >     | 1     | 2     | 2     | 1               | 1                   | 5     | 1               | 1                   |
| Cellular response to stress                           | 2     | 6     | 6     | >     | >               | 2                   | 1     | 3               | 2                   |
| Regulated cell death                                  | 3     | >     | 5     | 5     | 4               | 5                   | 8     | 8               | 8                   |
| Cellular contraction                                  | >     | >     | 6     | 4     | 3               | 3                   | 4     | 4               | 4                   |
| Cellular adhesion                                     | 4     | 3     | 5     | 4     | 3               | >                   | 7     | >               | >                   |
| Cytoskeleton dynamics                                 | >     | 7     | 4     | 7     | 6               | 7                   | >     | 7               | >                   |
| Amino acid metabolism                                 | >     | 5     | >     | >     | >               | >                   | 6     | 6               | 6                   |
| Electric transmission                                 | >     | 3     | 3     | >     | >               | >                   | >     | >               | >                   |
| Energy generation and metabolism of cellular monomers | >     | >     | >     | >     | 6               | >                   | 3     | 3               | 3                   |
| Vitamin metabolism                                    | >     | 4     | >     | >     | >               | >                   | 8     | 8               | 8                   |

# MBCOL2 dabrafenib (is c.toxic: yes)

## Upregulated

## Downregulated

complete

|                                                                  | MSN01 | MSN05 | MSN06 | MSN08 | MSN08-<br>-Alone | MSN08-<br>-WithHCAEC | MSN09 | MSN09-<br>-Alone | MSN09-<br>-WithHCAEC |
|------------------------------------------------------------------|-------|-------|-------|-------|------------------|----------------------|-------|------------------|----------------------|
| Metabolism of non-essential amino acids                          | 1     | 1     | 2     | 1     | 2                | 1                    | 1     | 1                | 2                    |
| Cellular response to oxidative stress                            | 6     | 2     | 4     | 10    | 1                | 1                    | 9     | 4                | 3                    |
| Apoptosis                                                        | 3     | 6     | 12    | 8     | 6                | 6                    | 5     | 4                | 3                    |
| Metabolism and transport of cholesterol, steroids and bile acids | v     | v     | v     | v     | 1                | 2                    | v     | v                | v                    |
| Matricellular protein signaling                                  | v     | 7     | 5     | 3     | 4                | 1                    | v     | 5                | 1                    |
| Cellular response to hypoxia                                     | v     | 6     | 11    | 6     | 3                | 2                    | v     | 8                | 5                    |
| Signaling pathways involved in hematopoiesis                     | 8     | 5     | 8     | 7     | 9                | 7                    | v     | 9                | v                    |
| Sig. pathways that control cell prol. and diff.                  | v     | 8     | 3     | 6     | 4                | 2                    | v     | 7                | v                    |
| Signaling pathways regulating water homeostasis                  | v     | 9     | 13    | 5     | 5                | 7                    | v     | 7                | v                    |
| Glycosaminoglycan metabolism                                     | v     | v     | v     | 6     | 11               | 4                    | v     | v                | v                    |
| PT protein modification and QC during secretory pathway          | 2     | 1     | v     | v     | 3                | v                    | v     | v                | v                    |
| ECM breakdown                                                    | v     | 4     | v     | v     | 6                | 3                    | v     | v                | v                    |
| Fatty acid metabolism                                            | v     | v     | v     | v     | 10               | 5                    | v     | v                | 4                    |
| Signaling by extracellular matrix components                     | v     | v     | v     | 4     | v                | v                    | v     | 6                | 10                   |
| Collagen biosynthesis                                            | 3     | 7     | v     | v     | v                | v                    | v     | v                | v                    |
| Intracellular common signaling cascades of multiple pathways     | 5     | 10    | v     | v     | v                | v                    | v     | v                | v                    |
| Basement membrane dynamics                                       | 4     | v     | v     | v     | v                | v                    | v     | v                | v                    |
| Neuronal signaling pathways                                      | v     | v     | 5     | v     | v                | v                    | v     | v                | v                    |

|                                                           | MSN01 | MSN05 | MSN06 | MSN08 | MSN08-<br>-Alone | MSN08-<br>-WithHCAEC | MSN09 | MSN09-<br>-Alone | MSN09-<br>-WithHCAEC |
|-----------------------------------------------------------|-------|-------|-------|-------|------------------|----------------------|-------|------------------|----------------------|
| Myofibril formation and organization                      | 2     | 4     | 1     | 6     | v                | 1                    | 3     | 1                | 11                   |
| Cardiomyocyte action potential generation and propagation | v     | v     | v     | v     | v                | v                    | v     | v                | v                    |
| Metabolism of fat-soluble vitamins                        | 5     | 6     | 4     | 5     | v                | v                    | v     | v                | v                    |
| Apoptosis                                                 | 10    | 4     | 2     | v     | v                | v                    | v     | v                | v                    |
| Centrosome cycle                                          | v     | v     | v     | v     | v                | v                    | v     | v                | v                    |
| ECM breakdown                                             | v     | 1     | 9     | v     | v                | v                    | v     | v                | v                    |
| Chromosome segregation by mitotic spindle                 | v     | v     | v     | v     | v                | v                    | v     | v                | v                    |
| Cellular response to hypoxia                              | v     | v     | v     | v     | v                | v                    | v     | v                | v                    |
| Eukaryotic DNA replication                                | v     | 2     | v     | v     | v                | v                    | v     | 1                | v                    |
| Epidermal growth factor family signaling                  | 1     | v     | v     | v     | v                | v                    | v     | v                | v                    |
| Basement membrane dynamics                                | v     | v     | v     | v     | v                | v                    | v     | v                | v                    |
| Mitotic cell cycle checkpoints                            | v     | 3     | v     | v     | v                | v                    | v     | v                | v                    |
| Thyroid hormone related signaling                         | 7     | v     | v     | v     | v                | 2                    | v     | v                | v                    |
| Matricellular protein signaling                           | v     | 5     | 7     | 3     | v                | v                    | v     | v                | v                    |
| Cytokinesis                                               | v     | v     | v     | v     | v                | v                    | v     | v                | v                    |
| Collagen biosynthesis                                     | 3     | v     | 9     | 7     | v                | v                    | v     | v                | v                    |
| Elastogenesis                                             | v     | v     | v     | v     | v                | 5                    | v     | v                | v                    |
| Complement pathway and regulation                         | v     | v     | 1     | v     | v                | v                    | v     | v                | v                    |
| Carbohydrate metabolism and transport                     | v     | v     | v     | v     | v                | v                    | 2     | v                | v                    |
| Neuronal action potential generation and propagation      | v     | v     | v     | v     | v                | v                    | v     | 4                | v                    |
| Fatty acid metabolism                                     | v     | v     | v     | v     | v                | v                    | v     | v                | v                    |
| Metabolism of tryptophan products                         | v     | v     | 5     | v     | v                | v                    | v     | v                | v                    |

no1stSVD

|                                                                  | MSN01 | MSN05 | MSN06 | MSN08 | MSN08-<br>-Alone | MSN08-<br>-WithHCAEC | MSN09 | MSN09-<br>-Alone | MSN09-<br>-WithHCAEC |
|------------------------------------------------------------------|-------|-------|-------|-------|------------------|----------------------|-------|------------------|----------------------|
| Metabolism of non-essential amino acids                          | 1     | 1     | 2     | 1     | 2                | 1                    | 1     | 1                | 2                    |
| Cellular response to oxidative stress                            | 8     | 2     | 4     | 11    | 1                | 2                    | 4     | 3                | 2                    |
| Matricellular protein signaling                                  | v     | 7     | 4     | 6     | 6                | 7                    | v     | 6                | 3                    |
| Signaling pathways involved in hematopoiesis                     | 10    | 5     | 3     | 8     | 11               | 9                    | v     | v                | v                    |
| Metabolism and transport of cholesterol, steroids and bile acids | v     | v     | v     | v     | 1                | 1                    | v     | v                | 1                    |
| Cellular response to hypoxia                                     | v     | 8     | 10    | 10    | 3                | 1                    | v     | 5                | 3                    |
| ECM breakdown                                                    | 4     | 4     | v     | v     | 7                | 8                    | 6     | v                | 13                   |
| Collagen biosynthesis                                            | 3     | v     | 7     | v     | v                | 12                   | 6     | v                | 5                    |
| Sig. pathways that control cell prol. and diff.                  | v     | 9     | 11    | v     | 5                | 10                   | 2     | v                | 7                    |
| Fatty acid metabolism                                            | v     | v     | v     | v     | 4                | 3                    | v     | v                | v                    |
| Apoptosis                                                        | v     | 3     | 5     | v     | v                | v                    | 9     | v                | 9                    |
| Signaling by extracellular matrix components                     | v     | v     | v     | v     | 8                | v                    | v     | 4                | 11                   |
| Glycosaminoglycan metabolism                                     | v     | v     | v     | v     | 11               | 3                    | v     | v                | v                    |
| Neuronal signaling pathways                                      | v     | v     | v     | v     | v                | v                    | 10    | 9                | v                    |
| PT protein modification and QC during secretory pathway          | 5     | 1     | v     | v     | v                | v                    | v     | v                | v                    |
| Actin filament dynamics                                          | 5     | v     | v     | v     | v                | v                    | 5     | v                | v                    |
| Carbohydrate metabolism and transport                            | v     | v     | v     | v     | 9                | v                    | v     | v                | 4                    |
| Signaling pathways regulating cardiovascular homeostasis         | v     | v     | v     | v     | v                | 4                    | v     | v                | v                    |
| Steroid hormone metabolism                                       | v     | v     | v     | v     | v                | 5                    | v     | v                | v                    |

|                                                           | MSN01 | MSN05 | MSN06 | MSN08 | MSN08-<br>-Alone | MSN08-<br>-WithHCAEC | MSN09 | MSN09-<br>-Alone | MSN09-<br>-WithHCAEC |
|-----------------------------------------------------------|-------|-------|-------|-------|------------------|----------------------|-------|------------------|----------------------|
| Myofibril formation and organization                      | v     | v     | v     | v     | v                | v                    | v     | v                | v                    |
| Cardiomyocyte action potential generation and propagation | v     | v     | v     | v     | v                | v                    | v     | v                | v                    |
| Metabolism of fat-soluble vitamins                        | v     | v     | 4     | 5     | v                | v                    | v     | v                | v                    |
| ECM breakdown                                             | 10    | v     | v     | v     | v                | v                    | v     | v                | v                    |
| Cellular response to hypoxia                              | v     | 6     | v     | v     | v                | v                    | v     | v                | v                    |
| Thyroid hormone related signaling                         | v     | v     | v     | v     | v                | v                    | v     | v                | v                    |
| Epidermal growth factor family signaling                  | v     | v     | v     | v     | v                | v                    | v     | v                | v                    |
| Apoptosis                                                 | 5     | v     | v     | v     | v                | v                    | v     | v                | v                    |
| Collagen biosynthesis                                     | v     | v     | v     | v     | v                | v                    | v     | v                | v                    |
| Elastogenesis                                             | v     | v     | 8     | v     | 4                | v                    | v     | v                | v                    |
| Chromosome segregation by mitotic spindle                 | v     | v     | v     | v     | v                | v                    | v     | v                | v                    |
| Eukaryotic DNA replication                                | v     | 2     | v     | v     | v                | v                    | v     | v                | v                    |
| Basement membrane dynamics                                | v     | v     | v     | v     | v                | v                    | v     | v                | v                    |
| Mitotic cell cycle checkpoints                            | v     | v     | v     | v     | v                | v                    | v     | v                | v                    |
| Centrosome cycle                                          | v     | v     | v     | v     | v                | v                    | v     | v                | v                    |
| Cytokinesis                                               | v     | v     | v     | v     | v                | v                    | v     | v                | v                    |
| Matricellular protein signaling                           | v     | 7     | v     | 3     | v                | v                    | v     | v                | v                    |
| Actin filament dynamics                                   | v     | v     | v     | v     | v                | v                    | v     | v                | v                    |
| Carbohydrate metabolism and transport                     | v     | v     | v     | v     | v                | v                    | v     | v                | v                    |
| Complement pathway and regulation                         | v     | v     | 1     | v     | v                | v                    | v     | v                | v                    |
| Neuronal action potential generation and propagation      | v     | v     | v     | v     | v                | v                    | v     | v                | v                    |
| Metabolism of tryptophan products                         | v     | v     | 5     | v     | v                | v                    | v     | v                | v                    |

decomposed

|                                                                  | MSN01 | MSN05 | MSN06 | MSN08 | MSN08-<br>-Alone | MSN08-<br>-WithHCAEC | MSN09 | MSN09-<br>-Alone | MSN09-<br>-WithHCAEC |
|------------------------------------------------------------------|-------|-------|-------|-------|------------------|----------------------|-------|------------------|----------------------|
| Metabolism of non-essential amino acids                          | 1     | 1     | 2     | 1     | 2                | 1                    | 1     | 1                | 2                    |
| Cellular response to oxidative stress                            | 8     | 2     | 4     | 11    | 1                | 2                    | 4     | 3                | 2                    |
| Matricellular protein signaling                                  | v     | 7     | 4     | 6     | 6                | 7                    | v     | 6                | 3                    |
| Signaling pathways involved in hematopoiesis                     | 10    | 5     | 3     | 8     | 11               | 9                    | v     | v                | v                    |
| Metabolism and transport of cholesterol, steroids and bile acids | v     | v     | v     | v     | 1                | 1                    | v     | v                | 1                    |
| Cellular response to hypoxia                                     | v     | 8     | 10    | 10    | 3                | 1                    | v     | 5                | 3                    |
| ECM breakdown                                                    | 4     | 4     | v     | v     | 7                | 8                    | 6     | v                | 13                   |
| Collagen biosynthesis                                            | 3     | v     | 7     | v     | v                | 12                   | 6     | v                | 5                    |
| Sig. pathways that control cell prol. and diff.                  | v     | 9     | 11    | v     | 5                | 10                   | 2     | v                | 7                    |
| Fatty acid metabolism                                            | v     | v     | v     | v     | 4                | 3                    | v     | v                | v                    |
| Apoptosis                                                        | v     | 3     | 5     | v     | v                | v                    | 9     | v                | 9                    |
| Signaling by extracellular matrix components                     | v     | v     | v     | v     | 8                | v                    | v     | 4                | 11                   |
| Glycosaminoglycan metabolism                                     | v     | v     | v     | v     | 11               | 3                    | v     | v                | v                    |
| Neuronal signaling pathways                                      | v     | v     | v     | v     | v                | v                    | 10    | 9                | v                    |
| PT protein modification and QC during secretory pathway          | 5     | 1     | v     | v     | v                | v                    | v     | v                | v                    |
| Actin filament dynamics                                          | 5     | v     | v     | v     | v                | v                    | 5     | v                | v                    |
| Carbohydrate metabolism and transport                            | v     | v     | v     | v     | 9                | v                    | v     | v                | 4                    |
| Signaling pathways regulating cardiovascular homeostasis         | v     | v     | v     | v     | v                | 4                    | v     | v                | v                    |
| Steroid hormone metabolism                                       | v     | v     | v     | v     | v                | 5                    | v     | v                | v                    |

|                                                           | MSN01 | MSN05 | MSN06 | MSN08 | MSN08-<br>-Alone | MSN08-<br>-WithHCAEC | MSN09 | MSN09-<br>-Alone | MSN09-<br>-WithHCAEC |
|-----------------------------------------------------------|-------|-------|-------|-------|------------------|----------------------|-------|------------------|----------------------|
| Myofibril formation and organization                      | v     | v     | v     | v     | v                | v                    | v     | v                | v                    |
| Cardiomyocyte action potential generation and propagation | v     | v     | v     | v     | v                | v                    | v     | v                | v                    |
| Metabolism of fat-soluble vitamins                        | v     | v     | 4     | 5     | v                | v                    | v     | v                | v                    |
| ECM breakdown                                             | 10    | v     | v     | v     | v                | v                    | v     | v                | v                    |
| Cellular response to hypoxia                              | v     | 6     | v     | v     | v                | v                    | v     | v                | v                    |
| Thyroid hormone related signaling                         | v     | v     | v     | v     | v                | v                    | v     | v                | v                    |
| Epidermal growth factor family signaling                  | v     | v     | v     | v     | v                | v                    | v     | v                | v                    |
| Apoptosis                                                 | 5     | v     | v     | v     | v                | v                    | v     | v                | v                    |
| Collagen biosynthesis                                     | v     | v     | v     | v     | v                | v                    | v     | v                | v                    |
| Elastogenesis                                             | v     | v     | 8     | v     | 4                | v                    | v     | v                | v                    |
| Chromosome segregation by mitotic spindle                 | v     | v     | v     | v     | v                | v                    | v     | v                | v                    |
| Eukaryotic DNA replication                                | v     | 2     | v     | v     | v                | v                    | v     | v                | v                    |
| Basement membrane dynamics                                | v     | v     | v     | v     | v                | v                    | v     | v                | v                    |
| Mitotic cell cycle checkpoints                            | v     | v     | v     | v     | v                | v                    | v     | v                | v                    |
| Centrosome cycle                                          | v     | v     | v     | v     | v                | v                    | v     | v                | v                    |
| Cytokinesis                                               | v     | v     | v     | v     | v                | v                    | v     | v                | v                    |
| Matricellular protein signaling                           | v     | 7     | v     | 3     | v                | v                    | v     | v                | v                    |
| Actin filament dynamics                                   | v     | v     | v     | v     | v                | v                    | v     | v                | v                    |
| Carbohydrate metabolism and transport                     | v     | v     | v     | v     | v                | v                    | v     | v                | v                    |
| Complement pathway and regulation                         | v     | v     | 1     | v     | v                | v                    | v     | v                | v                    |
| Neuronal action potential generation and propagation      | v     | v     | v     | v     | v                | v                    | v     | v                | v                    |
| Metabolism of tryptophan products                         | v     | v     | 5     | v     | v                | v                    | v     | v                | v                    |



# MBCOL2 pazopanib (is c.toxic: yes)

## Upregulated

## Downregulated

complete

|                                                                  | MSN01 | MSN05 | MSN06 | MSN08 | MSN08-Along | MSN08-WithHCAEC | MSN09 | MSN09-Along | MSN09-WithHCAEC |
|------------------------------------------------------------------|-------|-------|-------|-------|-------------|-----------------|-------|-------------|-----------------|
| Fatty acid metabolism                                            | 11    | 6     | 6     | 1     | 1           | 2               | 3     | 3           | v               |
| Mitochondrial energy production                                  | 1     | 1     | 8     | 4     | 2           | 3               | v     | v           | v               |
| Carbohydrate metabolism and transport                            | 3     | 4     | 10    | 3     | 4           | v               | 4     | 8           | v               |
| Metabolism and transport of cholesterol, steroids and bile acids | 8     | v     | 2     | 5     | 4           | v               | 1     | 1           | v               |
| Metabolism of non-essential amino acids                          | 2     | 2     | 1     | 2     | v           | v               | 2     | v           | v               |
| PT protein modification in mitochondria                          | 4     | 5     | 11    | 6     | v           | v               | 5     | v           | v               |
| Triacylglycerol metabolism and transport                         | v     | 7     | v     | v     | 3           | 4               | 10    | 10          | v               |
| Degradation by lysosomal enzymes                                 | 5     | v     | 4     | v     | 7           | v               | 8     | v           | v               |
| Chromosome segregation by mitotic spindle                        | v     | v     | v     | v     | v           | 1               | v     | 2           | 1               |
| DNA interstrand cross-links repair                               | v     | v     | v     | v     | v           | 7               | v     | 5           | 3               |
| Centrosome cycle                                                 | v     | v     | v     | v     | v           | 6               | v     | 6           | 4               |
| Ammonium metabolism                                              | 9     | v     | 5     | 8     | v           | v               | v     | v           | v               |
| Metabolism of purines and pyrimidines                            | v     | v     | v     | v     | v           | 5               | v     | 9           | 9               |
| Mitotic cell cycle checkpoints                                   | v     | v     | v     | v     | v           | 8               | v     | 11          | 5               |
| Eukaryotic DNA replication                                       | v     | v     | v     | v     | v           | v               | v     | v           | 2               |
| Collagen biosynthesis                                            | v     | v     | 3     | v     | v           | v               | v     | v           | v               |
| Cellular antioxidant systems                                     | v     | 3     | v     | v     | v           | v               | v     | v           | v               |

|                                                           | MSN01 | MSN05 | MSN06 | MSN08 | MSN08-Along | MSN08-WithHCAEC | MSN09 | MSN09-Along | MSN09-WithHCAEC |
|-----------------------------------------------------------|-------|-------|-------|-------|-------------|-----------------|-------|-------------|-----------------|
| Sig. pathways that control cell prol. and diff.           | 1     | 4     | 1     | 7     | 4           | 10              | 3     | 4           | 5               |
| ECM breakdown                                             | 6     | 3     | 4     | 5     | 5           | 7               | 10    | 6           | 6               |
| Cellular response to hypoxia                              | v     | 11    | 6     | 14    | v           | 1               | 1     | 3           | 1               |
| Matricellular protein signaling                           | v     | 1     | v     | 13    | 9           | 6               | 4     | 2           | 7               |
| Cell-cell adhesion                                        | 2     | 6     | 3     | 12    | 6           | v               | 6     | 11          | v               |
| Collagen biosynthesis                                     | v     | 2     | v     | 1     | 1           | 2               | v     | 1           | 3               |
| Myofibril formation and organization                      | v     | v     | v     | 8     | 13          | 8               | 2     | 13          | 4               |
| Elastogenesis                                             | v     | 5     | v     | v     | 7           | 4               | v     | 5           | 11              |
| Basement membrane dynamics                                | v     | v     | v     | v     | 2           | 5               | v     | 10          | 9               |
| Cardiomyocyte action potential generation and propagation | v     | v     | 5     | 4     | 10          | v               | 12    | v           | v               |
| Cellular response to radiation                            | 3     | 9     | v     | v     | v           | v               | v     | 8           | 16              |
| Apoptosis                                                 | 5     | v     | v     | v     | 14          | v               | 5     | 20          | v               |
| Neuronal signaling pathways                               | v     | v     | 2     | v     | 3           | v               | v     | 15          | v               |
| Carbohydrate metabolism and transport                     | v     | v     | v     | v     | v           | 3               | v     | 17          | 2               |
| TGF-beta superfamily signaling                            | v     | v     | v     | 2     | v           | v               | v     | 7           | v               |
| Epidermal growth factor family signaling                  | 4     | v     | v     | 9     | v           | v               | v     | v           | v               |
| Signaling by extracellular matrix components              | v     | v     | v     | 4     | v           | v               | 12    | v           | v               |

no1stSVD

|                                                                  | MSN01 | MSN05 | MSN06 | MSN08 | MSN08-Along | MSN08-WithHCAEC | MSN09 | MSN09-Along | MSN09-WithHCAEC |
|------------------------------------------------------------------|-------|-------|-------|-------|-------------|-----------------|-------|-------------|-----------------|
| Fatty acid metabolism                                            | 12    | 4     | 5     | 1     | 2           | 4               | 3     | 6           | v               |
| Mitochondrial energy production                                  | 1     | 1     | 8     | 2     | 1           | 10              | 8     | 9           | v               |
| Metabolism and transport of cholesterol, steroids and bile acids | 9     | v     | 1     | 5     | 3           | 6               | 1     | 2           | v               |
| Metabolism of non-essential amino acids                          | 3     | 2     | 2     | 3     | 8           | v               | 2     | v           | 11              |
| Carbohydrate metabolism and transport                            | 2     | 3     | 11    | 4     | 6           | v               | 4     | 10          | v               |
| Triacylglycerol metabolism and transport                         | v     | 7     | v     | v     | 4           | 8               | 10    | 11          | 16              |
| PT protein modification in mitochondria                          | 4     | 6     | 10    | 6     | v           | v               | 5     | v           | v               |
| Cellular response to hypoxia                                     | 6     | v     | v     | 10    | 5           | v               | 11    | v           | v               |
| Chromosome segregation by mitotic spindle                        | v     | v     | v     | v     | v           | 1               | v     | 1           | 1               |
| Mitotic cell cycle checkpoints                                   | v     | v     | v     | v     | v           | 2               | v     | 5           | 5               |
| Cytokinesis                                                      | v     | v     | v     | v     | v           | 3               | v     | 3           | 3               |
| Centrosome cycle                                                 | v     | v     | v     | v     | v           | 7               | v     | 7           | 4               |
| DNA interstrand cross-links repair                               | v     | v     | v     | v     | v           | 5               | v     | 4           | 6               |
| Degradation by lysosomal enzymes                                 | 5     | v     | 4     | v     | v           | v               | 8     | v           | v               |
| Cellular antioxidant systems                                     | v     | 7     | 5     | v     | v           | v               | v     | v           | v               |
| Eukaryotic DNA replication                                       | v     | v     | v     | v     | v           | 12              | v     | v           | 2               |
| Collagen biosynthesis                                            | v     | v     | 3     | v     | v           | v               | v     | v           | v               |

|                                                           | MSN01 | MSN05 | MSN06 | MSN08 | MSN08-Along | MSN08-WithHCAEC | MSN09 | MSN09-Along | MSN09-WithHCAEC |
|-----------------------------------------------------------|-------|-------|-------|-------|-------------|-----------------|-------|-------------|-----------------|
| Sig. pathways that control cell prol. and diff.           | 1     | 4     | 1     | 4     | 2           | 5               | 3     | 5           | 12              |
| ECM breakdown                                             | v     | 3     | 3     | 2     | 1           | 6               | 6     | 6           | 6               |
| Matricellular protein signaling                           | v     | 1     | v     | 11    | 4           | 10              | 2     | 3           | 4               |
| Cellular response to hypoxia                              | v     | 12    | 6     | 15    | v           | 1               | 1     | 2           | 1               |
| Apoptosis                                                 | 5     | v     | v     | 10    | 11          | 7               | 5     | 10          | 18              |
| Collagen biosynthesis                                     | v     | 2     | v     | 7     | 3           | 3               | v     | 1           | 2               |
| Myofibril formation and organization                      | v     | v     | v     | 13    | 9           | 2               | 4     | 8           | 5               |
| Signaling pathways involved in hematopoiesis              | 3     | 7     | 10    | 3     | 7           | v               | v     | 18          | v               |
| Cellular response to radiation                            | 2     | 9     | v     | v     | 16          | 11              | v     | 7           | 13              |
| Elastogenesis                                             | v     | 6     | v     | v     | 5           | 12              | v     | 4           | 8               |
| Cell-cell adhesion                                        | 6     | 5     | 7     | 8     | v           | v               | v     | v           | v               |
| Cardiomyocyte action potential generation and propagation | v     | v     | 5     | 1     | 17          | v               | 9     | v           | v               |
| Epidermal growth factor family signaling                  | 4     | v     | v     | 6     | 13          | 14              | v     | v           | v               |
| Neuronal signaling pathways                               | v     | v     | 2     | v     | 8           | 9               | v     | v           | v               |
| Carbohydrate metabolism and transport                     | v     | v     | v     | v     | v           | 4               | v     | 16          | 3               |
| Microtubule dynamics                                      | v     | v     | 4     | 12    | v           | v               | v     | v           | v               |
| TGF-beta superfamily signaling                            | v     | v     | v     | 5     | v           | v               | v     | v           | v               |

decomposed

|                                                                  | MSN01 | MSN05 | MSN06 | MSN08 | MSN08-Along | MSN08-WithHCAEC | MSN09 | MSN09-Along | MSN09-WithHCAEC |
|------------------------------------------------------------------|-------|-------|-------|-------|-------------|-----------------|-------|-------------|-----------------|
| Fatty acid metabolism                                            | 12    | 4     | 5     | 1     | 2           | 4               | 3     | 6           | v               |
| Mitochondrial energy production                                  | 1     | 1     | 8     | 2     | 1           | 10              | 8     | 9           | v               |
| Metabolism and transport of cholesterol, steroids and bile acids | 9     | v     | 1     | 5     | 3           | 6               | 1     | 2           | v               |
| Metabolism of non-essential amino acids                          | 3     | 2     | 2     | 3     | 8           | v               | 2     | v           | 11              |
| Carbohydrate metabolism and transport                            | 2     | 3     | 11    | 4     | 6           | v               | 4     | 10          | v               |
| Triacylglycerol metabolism and transport                         | v     | 7     | v     | v     | 4           | 8               | 10    | 11          | 16              |
| PT protein modification in mitochondria                          | 4     | 6     | 10    | 6     | v           | v               | 5     | v           | v               |
| Cellular response to hypoxia                                     | 6     | v     | v     | 10    | 5           | v               | 11    | v           | v               |
| Chromosome segregation by mitotic spindle                        | v     | v     | v     | v     | v           | 1               | v     | 1           | 1               |
| Mitotic cell cycle checkpoints                                   | v     | v     | v     | v     | v           | 2               | v     | 5           | 5               |
| Cytokinesis                                                      | v     | v     | v     | v     | v           | 3               | v     | 3           | 3               |
| Centrosome cycle                                                 | v     | v     | v     | v     | v           | 7               | v     | 7           | 4               |
| DNA interstrand cross-links repair                               | v     | v     | v     | v     | v           | 5               | v     | 4           | 6               |
| Degradation by lysosomal enzymes                                 | 5     | v     | 4     | v     | v           | v               | 8     | v           | v               |
| Cellular antioxidant systems                                     | v     | 7     | 5     | v     | v           | v               | v     | v           | v               |
| Eukaryotic DNA replication                                       | v     | v     | v     | v     | v           | 12              | v     | v           | 2               |
| Collagen biosynthesis                                            | v     | v     | 3     | v     | v           | v               | v     | v           | v               |

|                                                           | MSN01 | MSN05 | MSN06 | MSN08 | MSN08-Along | MSN08-WithHCAEC | MSN09 | MSN09-Along | MSN09-WithHCAEC |
|-----------------------------------------------------------|-------|-------|-------|-------|-------------|-----------------|-------|-------------|-----------------|
| Sig. pathways that control cell prol. and diff.           | 1     | 4     | 1     | 4     | 2           | 5               | 3     | 5           | 12              |
| ECM breakdown                                             | v     | 3     | 3     | 2     | 1           | 6               | 6     | 6           | 6               |
| Matricellular protein signaling                           | v     | 1     | v     | 11    | 4           | 10              | 2     | 3           | 4               |
| Cellular response to hypoxia                              | v     | 12    | 6     | 15    | v           | 1               | 1     | 2           | 1               |
| Apoptosis                                                 | 5     | v     | v     | 10    | 11          | 7               | 5     | 10          | 18              |
| Collagen biosynthesis                                     | v     | 2     | v     | 7     | 3           | 3               | v     | 1           | 2               |
| Myofibril formation and organization                      | v     | v     | v     | 13    | 9           | 2               | 4     | 8           | 5               |
| Signaling pathways involved in hematopoiesis              | 3     | 7     | 10    | 3     | 7           | v               | v     | 18          | v               |
| Cellular response to radiation                            | 2     | 9     | v     | v     | 16          | 11              | v     | 7           | 13              |
| Elastogenesis                                             | v     | 6     | v     | v     | 5           | 12              | v     | 4           | 8               |
| Cell-cell adhesion                                        | 6     | 5     | 7     | 8     | v           | v               | v     | v           | v               |
| Cardiomyocyte action potential generation and propagation | v     | v     | 5     | 1     | 17          | v               | 9     | v           | v               |
| Epidermal growth factor family signaling                  | 4     | v     | v     | 6     | 13          | 14              | v     | v           | v               |
| Neuronal signaling pathways                               | v     | v     | 2     | v     | 8           | 9               | v     | v           | v               |
| Carbohydrate metabolism and transport                     | v     | v     | v     | v     | v           | 4               | v     | 16          | 3               |
| Microtubule dynamics                                      | v     | v     | 4     | 12    | v           | v               | v     | v           | v               |
| TGF-beta superfamily signaling                            | v     | v     | v     | 5     | v           | v               | v     | v           | v               |

# MBCOL3 dabrafenib (is c.toxic: yes)

## Upregulated

## Downregulated

complete

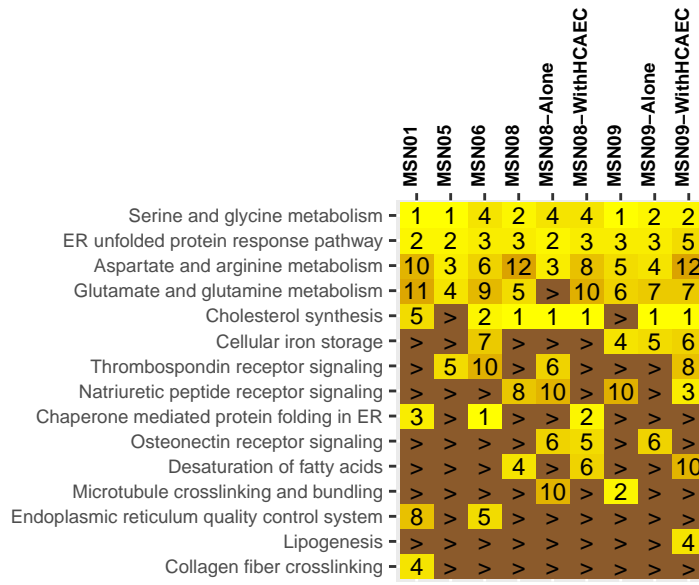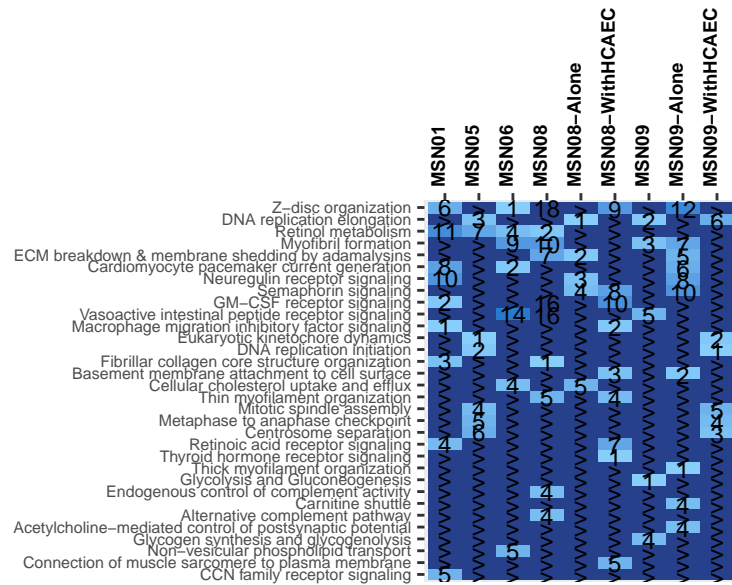

no1stSVD

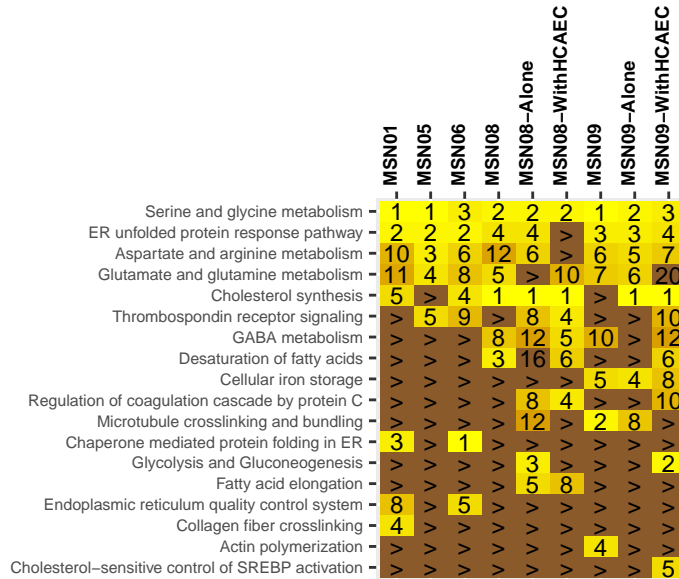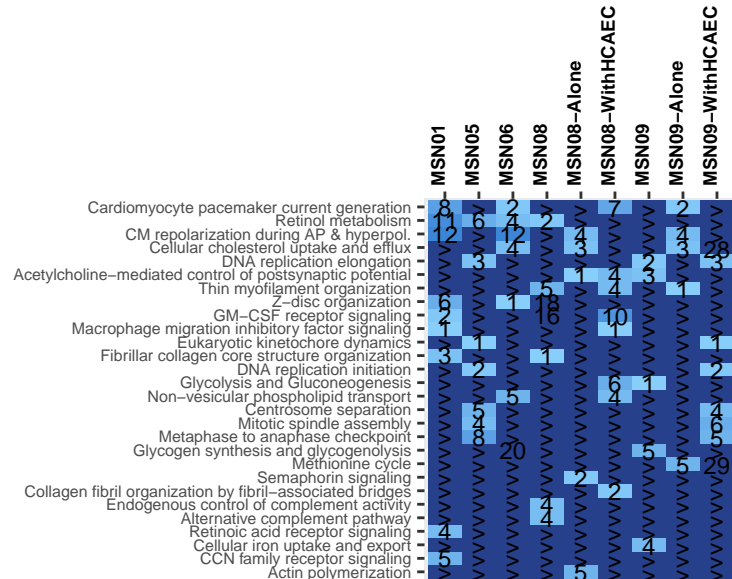

decomposed

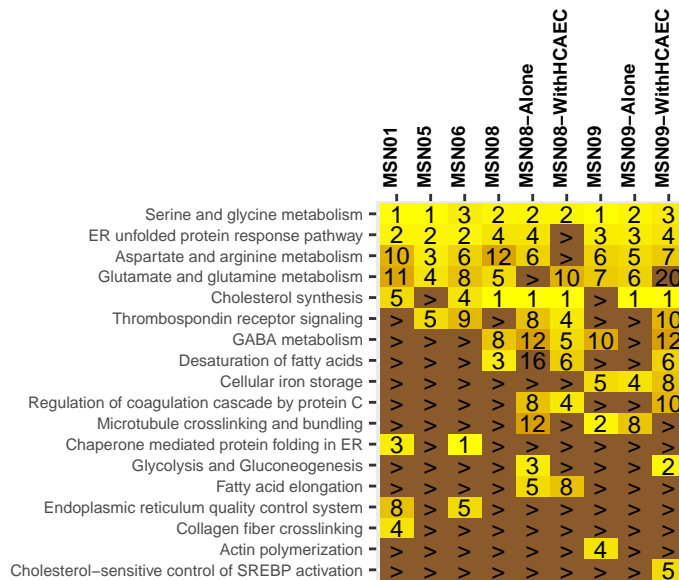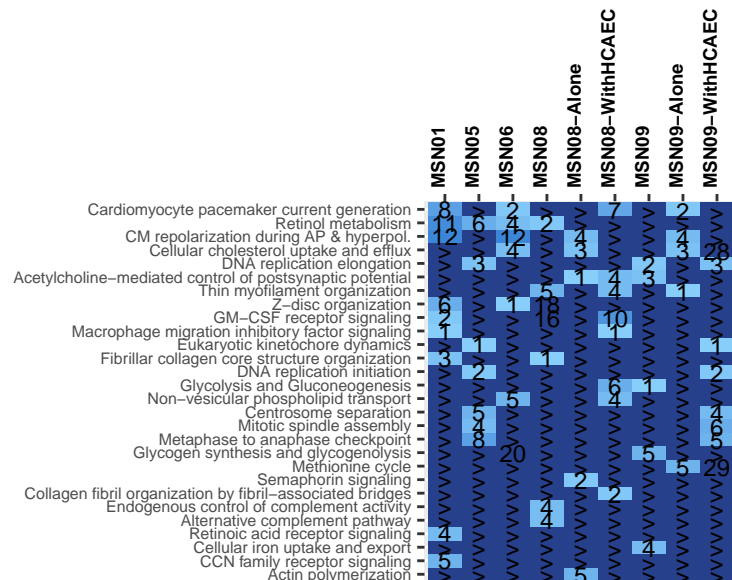

**MBCOL3  
pazopanib  
(is c.toxic: yes)**

**Upregulated**

**Downregulated**

**complete**

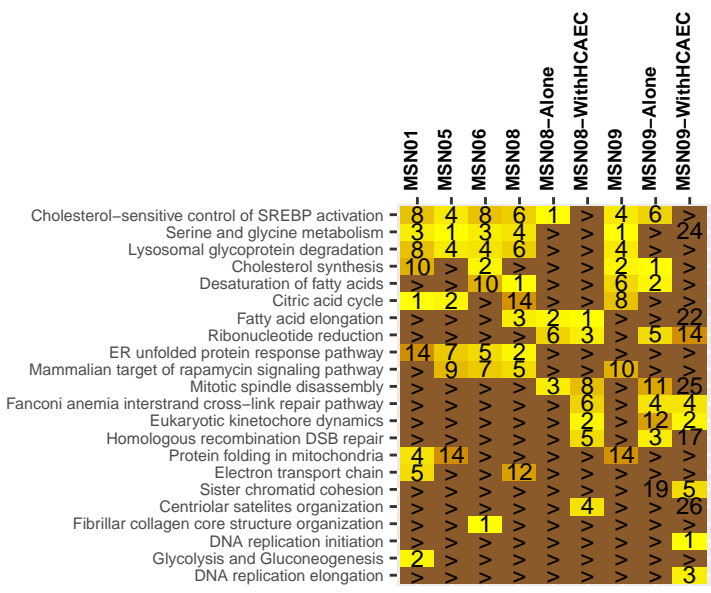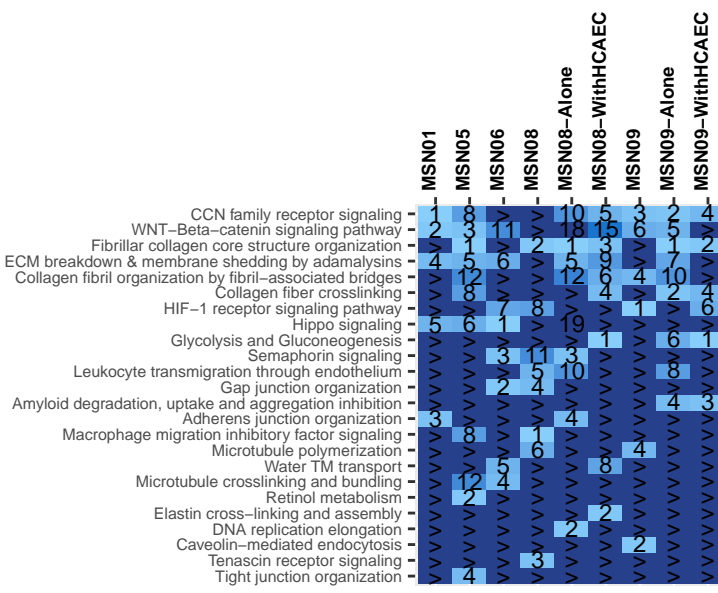

**no1stSVD**

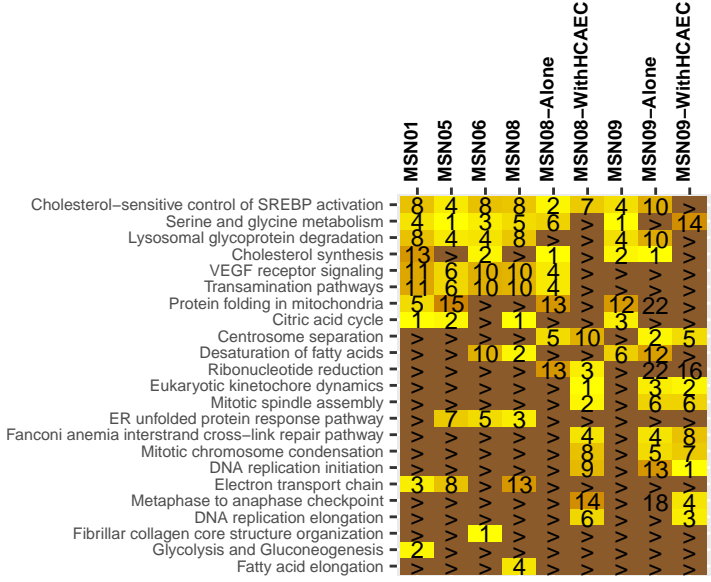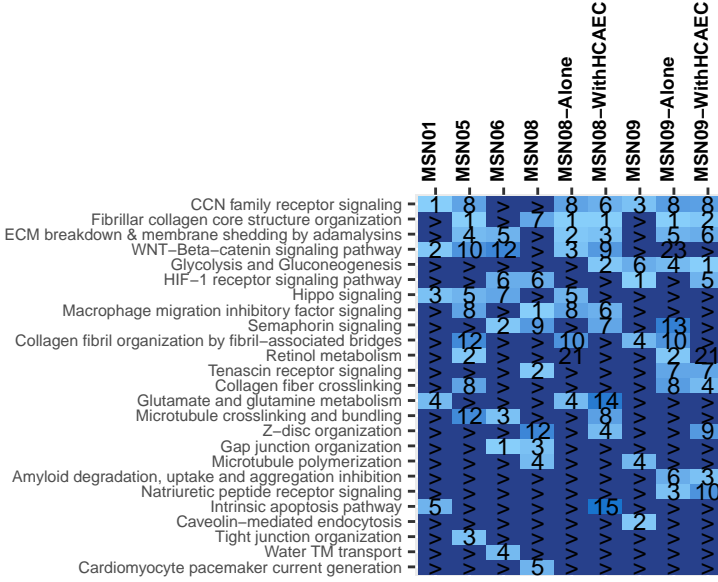

**decomposed**

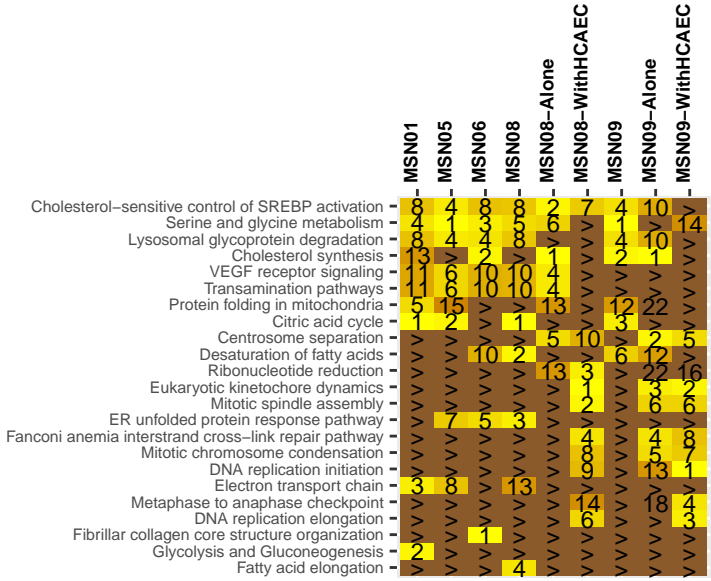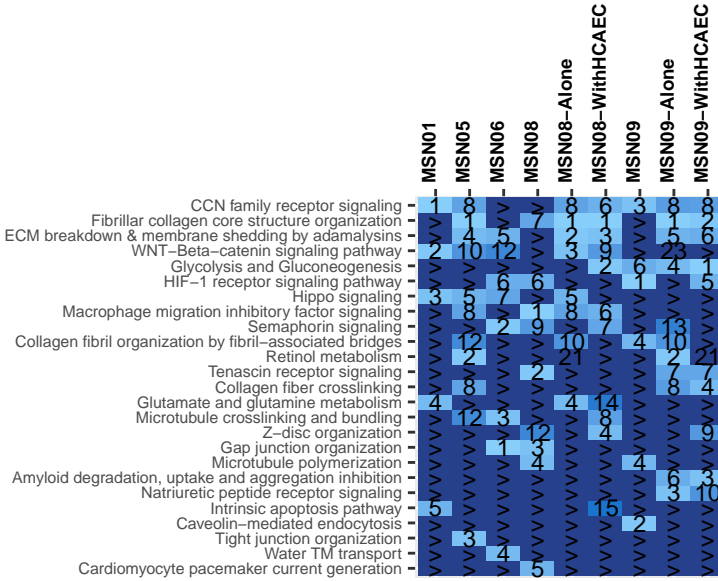

# MBCOL4 dabrafenib (is c.toxic: yes)

## Upregulated

## Downregulated

complete

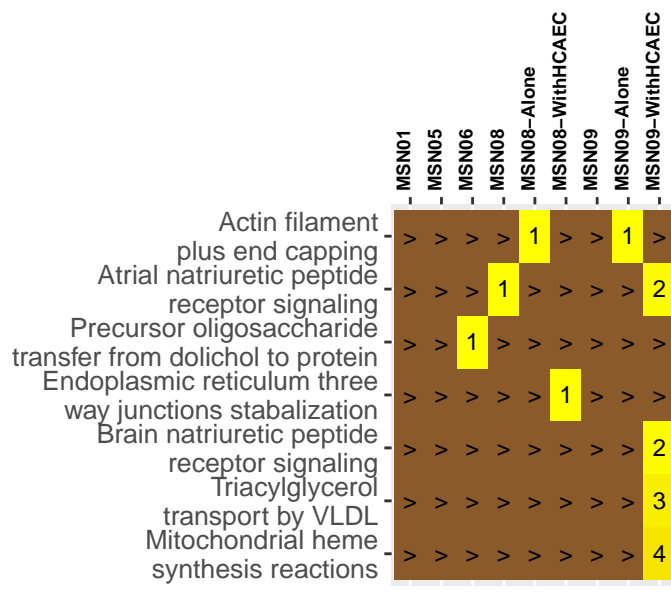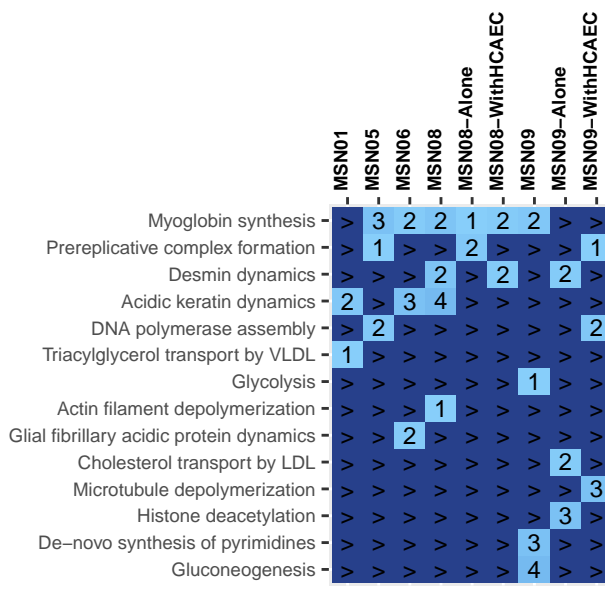

no1stSVD

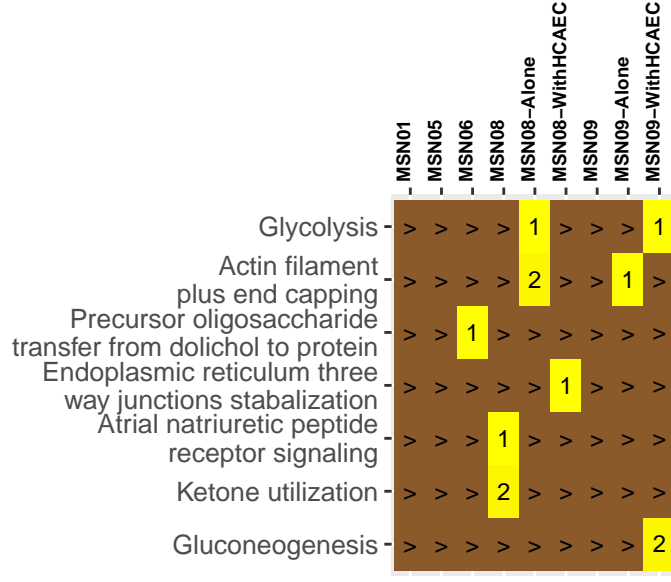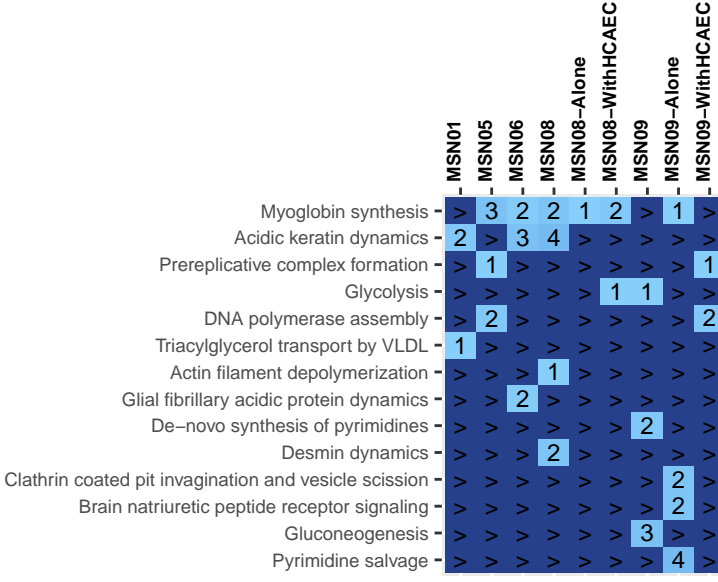

decomposed

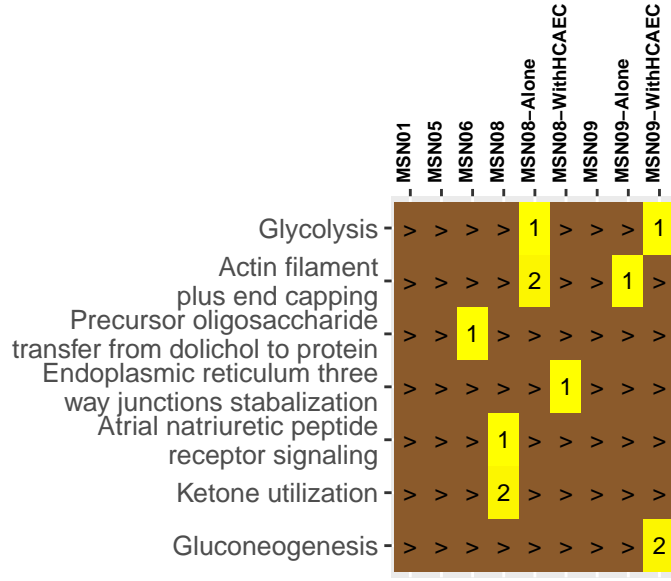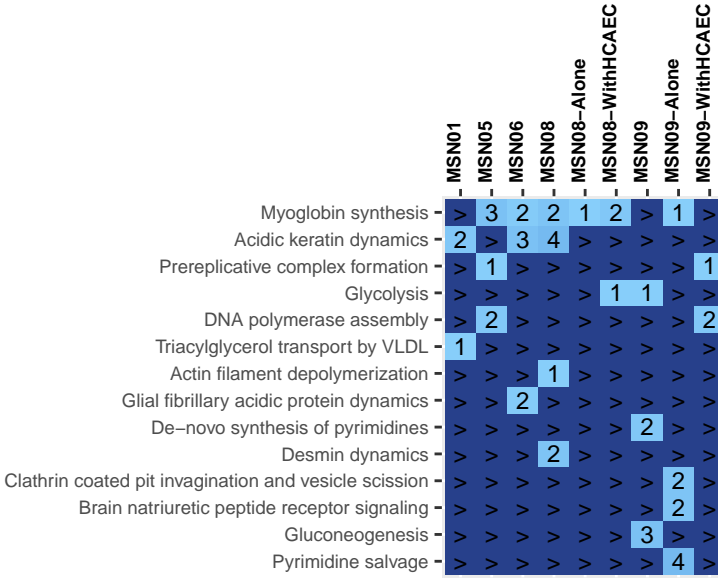

**MBCOL4**  
**pazopanib**  
(is c.toxic: yes)

**Upregulated**

**Downregulated**

**complete**

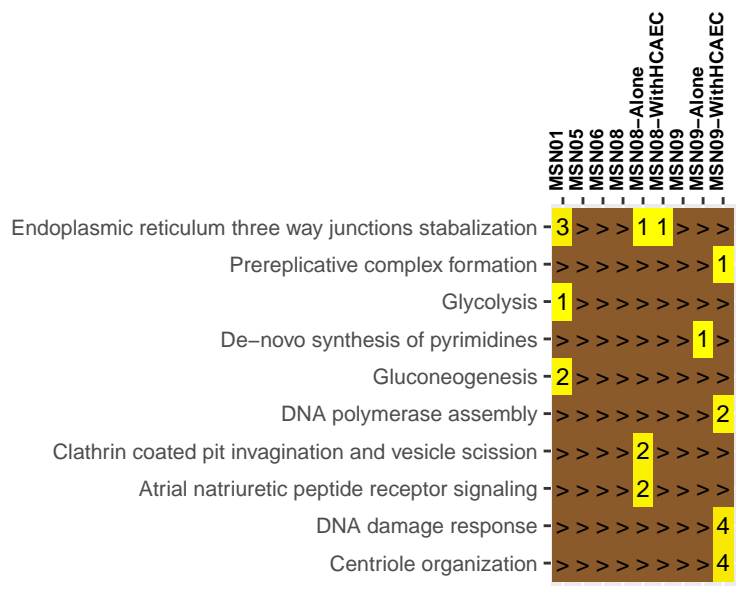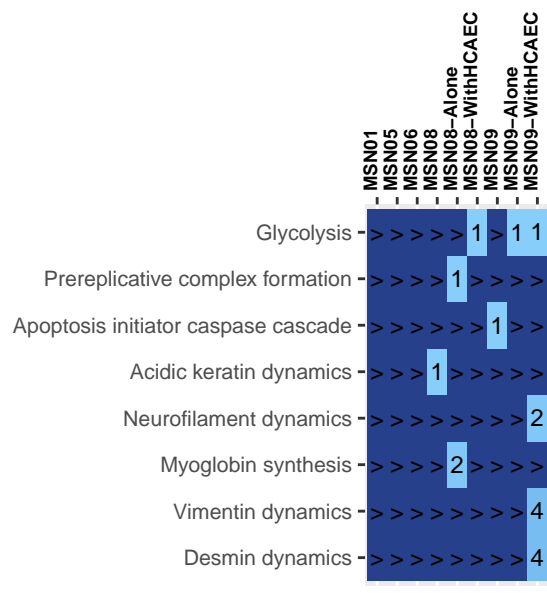

**no1stSVD**

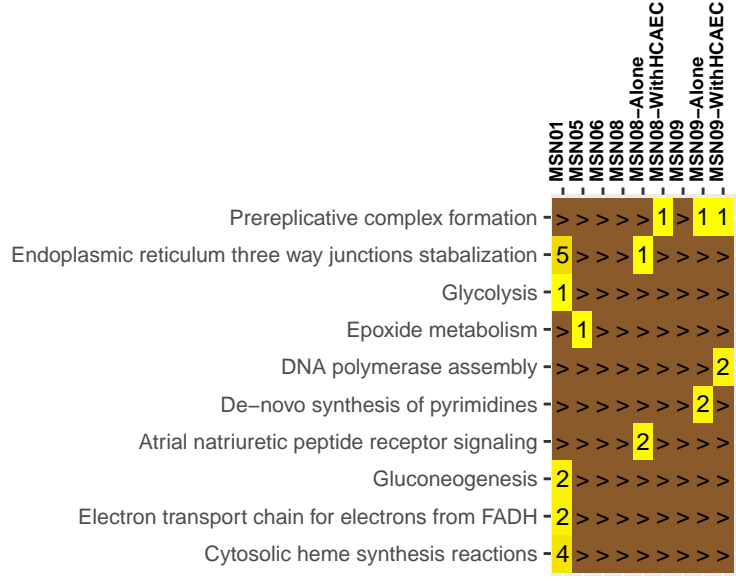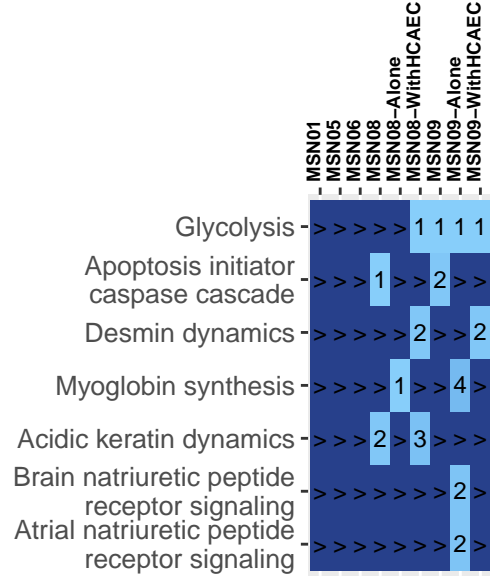

**decomposed**

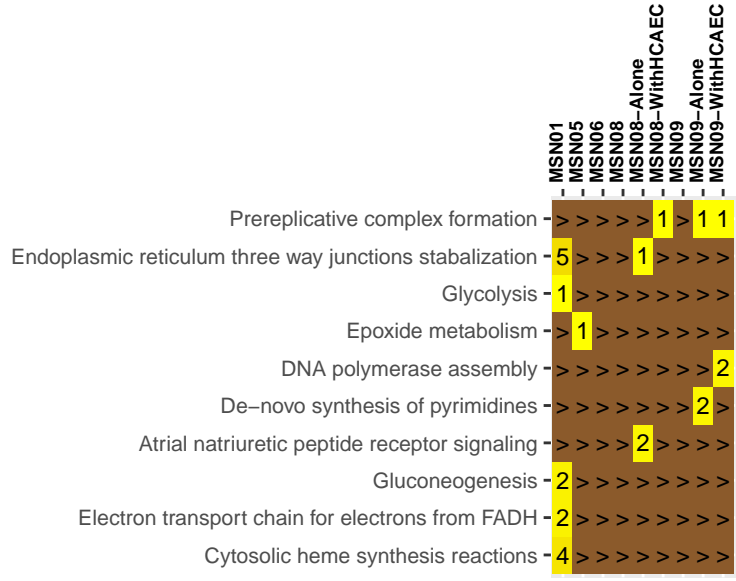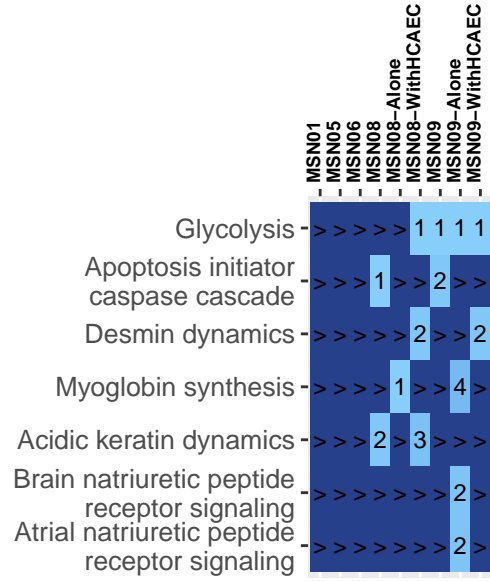

**Supplementary Figure 29.** Top Subcellular Processes predicted from complete gene expression profiles, after removal of first eigenarray and from drug-selective gene expression profiles of all dabrafenib or pazopanib-treated samples. **(A)** Complete, decomposed gene expression profiles and gene expression profiles after removal of the first eigenarray of the original and new dabrafenib or pazopanib treated samples were subjected to pathway enrichment analysis using the Molecular Biology of the Cell Ontology and Fisher's Exact Test to identify up- and downregulated subcellular processes (SCPs). Significant up- or downregulated **(B)** level-1, **(C)** -2, **(D)** -3 and **(E)** -4 SCPs (pvalue  $\leq 0.05$ ) were separately ranked by significance for each cell line/drug combination. SCPs predicted for each drug are shown if they are among the top five ranked SCPs for at least one cell line. Numbers indicate ranks, '>' indicates that an SCP was not predicted or predicted with a rank above 99. 'Alone' and 'With HCAEC' label additional datasets obtained without or with endothelial cell cocultures, respectively. Results for the original samples are also shown in Supplemental figure 14.

- 100 Herrmann, J. Adverse cardiac effects of cancer therapies: cardiotoxicity and arrhythmia. *Nat Rev*  
*Cardiol* **17**, 474-502 (2020). <https://doi.org/10.1038/s41569-020-0348-1>
- 101 Gammella, E., Maccarinelli, F., Buratti, P., Recalcatti, S. & Cairo, G. The role of iron in  
anthracycline cardiotoxicity. *Front Pharmacol* **5**, 25 (2014).  
<https://doi.org/10.3389/fphar.2014.00025>
- 102 Cole, D. C. & Frishman, W. H. Cardiovascular Complications of Proteasome Inhibitors Used in  
Multiple Myeloma. *Cardiol Rev* **26**, 122-129 (2018).  
<https://doi.org/10.1097/CRD.000000000000183>
- 103 Fabarius, A. *et al.* Centrosome aberrations after nilotinib and imatinib treatment in vitro are  
associated with mitotic spindle defects and genetic instability. *Br J Haematol* **138**, 369-373  
(2007). <https://doi.org/10.1111/j.1365-2141.2007.06678.x>
- 104 Giehl, M. *et al.* Detection of centrosome aberrations in disease-unrelated cells from patients  
with tumor treated with tyrosine kinase inhibitors. *Eur J Haematol* **85**, 139-148 (2010).  
<https://doi.org/10.1111/j.1600-0609.2010.01459.x>
- 105 Sethunath, V. *et al.* Targeting the Mevalonate Pathway to Overcome Acquired Anti-HER2  
Treatment Resistance in Breast Cancer. *Mol Cancer Res* **17**, 2318-2330 (2019).  
<https://doi.org/10.1158/1541-7786.MCR-19-0756>
- 106 Bienengraeber, M. *et al.* ABCC9 mutations identified in human dilated cardiomyopathy disrupt  
catalytic KATP channel gating. *Nat Genet* **36**, 382-387 (2004). <https://doi.org/10.1038/ng1329>
- 107 Dupont, E. *et al.* Altered connexin expression in human congestive heart failure. *J Mol Cell*  
*Cardiol* **33**, 359-371 (2001). <https://doi.org/10.1006/jmcc.2000.1308>
- 108 Perea-Gil, I. *et al.* Serine biosynthesis as a novel therapeutic target for dilated cardiomyopathy.  
*Eur Heart J* **43**, 3477-3489 (2022). <https://doi.org/10.1093/eurheartj/ehac305>
- 109 Gorabi, A. M. *et al.* Statins Attenuate Fibrotic Manifestations of Cardiac Tissue Damage. *Curr Mol*  
*Pharmacol* **14**, 782-797 (2021). <https://doi.org/10.2174/1874467214666210210123206>
- 110 Okuyama, H. *et al.* Statins stimulate atherosclerosis and heart failure: pharmacological  
mechanisms. *Expert Rev Clin Pharmacol* **8**, 189-199 (2015).  
<https://doi.org/10.1586/17512433.2015.1011125>
- 111 Rotariu, D. *et al.* Oxidative stress - Complex pathological issues concerning the hallmark of  
cardiovascular and metabolic disorders. *Biomed Pharmacother* **152**, 113238 (2022).  
<https://doi.org/10.1016/j.biopha.2022.113238>
- 112 Groenendyk, J., Sreenivasaiah, P. K., Kim, D. H., Agellon, L. B. & Michalak, M. Biology of  
endoplasmic reticulum stress in the heart. *Circ Res* **107**, 1185-1197 (2010).  
<https://doi.org/10.1161/CIRCRESAHA.110.227033>
- 113 Medamana, J., Clark, R. A. & Butler, J. Platelet-Derived Growth Factor in Heart Failure. *Handb*  
*Exp Pharmacol* **243**, 355-369 (2017). [https://doi.org/10.1007/164\\_2016\\_80](https://doi.org/10.1007/164_2016_80)
- 114 Cheng, M., Park, H., Engelmayer, G. C., Moretti, M. & Freed, L. E. Effects of regulatory factors on  
engineered cardiac tissue in vitro. *Tissue Eng* **13**, 2709-2719 (2007).  
<https://doi.org/10.1089/ten.2006.0414>
- 115 Vantler, M. *et al.* PDGF-BB protects cardiomyocytes from apoptosis and improves contractile  
function of engineered heart tissue. *J Mol Cell Cardiol* **48**, 1316-1323 (2010).  
<https://doi.org/10.1016/j.yjmcc.2010.03.008>
- 116 McGrath, M. F., de Bold, M. L. & de Bold, A. J. The endocrine function of the heart. *Trends*  
*Endocrinol Metab* **16**, 469-477 (2005). <https://doi.org/10.1016/j.tem.2005.10.007>
- 117 Ding, K., Gui, Y., Hou, X., Ye, L. & Wang, L. Transient Receptor Potential Channels, Natriuretic  
Peptides, and Angiotensin Receptor-Nephrilysin Inhibitors in Patients With Heart Failure. *Front*  
*Cardiovasc Med* **9**, 904881 (2022). <https://doi.org/10.3389/fcvm.2022.904881>

- 118 Ong, S. G. & Hausenloy, D. J. Hypoxia-inducible factor as a therapeutic target for cardioprotection. *Pharmacol Ther* **136**, 69-81 (2012). <https://doi.org:10.1016/j.pharmthera.2012.07.005>
- 119 Kubin, T. *et al.* The Role of Oncostatin M and Its Receptor Complexes in Cardiomyocyte Protection, Regeneration, and Failure. *Int J Mol Sci* **23** (2022). <https://doi.org:10.3390/ijms23031811>
- 120 Wang, P. *et al.* The alteration of Hippo/YAP signaling in the development of hypertrophic cardiomyopathy. *Basic Res Cardiol* **109**, 435 (2014). <https://doi.org:10.1007/s00395-014-0435-8>
- 121 Horn, M. A. & Trafford, A. W. Aging and the cardiac collagen matrix: Novel mediators of fibrotic remodelling. *J Mol Cell Cardiol* **93**, 175-185 (2016). <https://doi.org:10.1016/j.yjmcc.2015.11.005>
- 122 Baiocchi, A. *et al.* Extracellular Matrix Molecular Remodeling in Human Liver Fibrosis Evolution. *PLoS One* **11**, e0151736 (2016). <https://doi.org:10.1371/journal.pone.0151736>
- 123 Shangzu, Z. *et al.* Aquaporins: Important players in the cardiovascular pathophysiology. *Pharmacol Res* **183**, 106363 (2022). <https://doi.org:10.1016/j.phrs.2022.106363>
